# Supplementary material
Source: PubMed Central journal article supplement (PMC7195258)
Supplement: NIHMS1566883-supplement-3.pdf [file NIHMS1566883-supplement-3.pdf]

**Supplementary Table 2.** Significant differentially expressed genes and pathways in SPC-Cre KPG and KP cell lines. SPC-Cre KPG-KP: List of genes differentially expressed in SPC-KPG cells compared to SPC-KP cells (*P*-adjusted < 0.05 and |log2 fold change| > 1; n = 1254 genes).

| genes                 | GeneVer               | GeneID              | GeneType                           | GeneName      | SPC-KPG_mean | SPC-KP_mean | log2FoldChange | lfcSE     | stat      | pvalue    | padj      |
|-----------------------|-----------------------|---------------------|------------------------------------|---------------|--------------|-------------|----------------|-----------|-----------|-----------|-----------|
| ENSMUSG0000001555.10  | ENSMUSG0000001555.10  | ENSMUSG0000001555   | protein coding                     | Fkbp10        | 40.96588091  | 9.773265436 | 2.08519595     | 0.4969764 | 4.1956909 | 2.72E-05  | 0.002606  |
| ENSMUSG0000003941.16  | ENSMUSG0000003941.16  | ENSMUSG0000003941   | protein coding                     | Nov2          | 14.57232272  | 40.06567917 | -1.462806538   | 0.4016254 | -3.642216 | 0.002703  | 0.002009  |
| ENSMUSG0000007895.14  | ENSMUSG0000007895.14  | ENSMUSG0000007895   | protein coding                     | Left1         | 174.661979   | 27.0033123  | 2.669379311    | 0.2624569 | 10.273098 | 9.23E-25  | 6.25E-23  |
| ENSMUSG0000004311.0   | ENSMUSG0000004311.0   | ENSMUSG0000004311   | protein coding                     | Lrrn4         | 10.02149336  | 30.04458855 | -1.689033037   | 0.564802  | -2.864716 | 0.0041739 | 0.0323877 |
| ENSMUSG00000094635.2  | ENSMUSG00000094635.2  | ENSMUSG00000094635  | processed_pseudogene               | Gm7104        | 4.915419154  | 0           | 4.66379365     | 1.7555932 | 6.2608383 | 0.008292  | 0.038332  |
| ENSMUSG00000020940.13 | ENSMUSG00000020940.13 | ENSMUSG00000020940  | protein coding                     | 170023706Rik  | 9.81011276   | 0           | 5.61908277     | 1.4910554 | 3.7685111 | 0.001842  | 0.0012902 |
| ENSMUSG00000087201.1  | ENSMUSG00000087201.1  | ENSMUSG00000087201  | antisense_RNA                      | Gm15261       | 5.48621522   | 0           | 4.813712691    | 1.7363305 | 2.772481  | 0.005653  | 0.0273801 |
| ENSMUSG00000018479.12 | ENSMUSG00000018479.12 | ENSMUSG00000018479  | protein coding                     | 1700125H20Rik | 21.22438347  | 42.82420637 | -1.017043844   | 0.3893913 | -2.611881 | 0.009046  | 0.0404068 |
| ENSMUSG00000059336.14 | ENSMUSG00000059336.14 | ENSMUSG00000059336  | protein coding                     | Slc14a1       | 6.275188198  | 501.1138929 | -6.261417746   | 0.3785676 | -16.53976 | 1.898E-61 | 3.95E-59  |
| ENSMUSG00000039347.7  | ENSMUSG00000039347.7  | ENSMUSG00000039347  | protein coding                     | Atp9a2        | 48.0269008   | 97.68737058 | -1.02477019    | 0.2939411 | -4.28166  | 1.855E-05 | 0.001849  |
| ENSMUSG00000029727.7  | ENSMUSG00000029727.7  | ENSMUSG00000029727  | protein coding                     | Cytp3a13      | 458.4565718  | 145.6274498 | 1.654622968    | 0.1560979 | 12.201523 | 3.05E-34  | 3.132E-32 |
| ENSMUSG00000112716.12 | ENSMUSG00000112716.12 | ENSMUSG00000112716  | lincRNA                            | AC134528.2    | 33.63900654  | 10.76240278 | 1.653724637    | 0.5230968 | 3.1614726 | 0.0015697 | 0.0029996 |
| ENSMUSG00000079484.12 | ENSMUSG00000079484.12 | ENSMUSG00000079484  | protein coding                     | Phyhd1        | 150.1557341  | 61.12797013 | 1.298935402    | 0.3039976 | 4.2728471 | 1.93E-05  | 0.0001914 |
| ENSMUSG00000092981.1  | ENSMUSG00000092981.1  | ENSMUSG00000092981  | miRNA                              | Mir1525       | 4.57749357   | 49.83226357 | -3.43020303    | 0.5169813 | -6.635062 | 3.244E-11 | 7.866E-10 |
| ENSMUSG00000046352.7  | ENSMUSG00000046352.7  | ENSMUSG00000046352  | protein coding                     | Gjb2          | 52.93022105  | 18.74958963 | 1.497610934    | 0.345292  | 4.3372298 | 1.443E-05 | 0.001467  |
| ENSMUSG00000031596.15 | ENSMUSG00000031596.15 | ENSMUSG00000031596  | protein coding                     | Slc7a2        | 36.30914772  | 1.4923903   | 4.66467777     | 0.9020105 | 5.1817634 | 2.19E-07  | 3.139E-06 |
| ENSMUSG00000042312.9  | ENSMUSG00000042312.9  | ENSMUSG00000042312  | protein coding                     | S100a13       | 357.8503372  | 101.1053227 | 1.825832809    | 0.1534974 | 11.894876 | 1.258E-32 | 1.217E-30 |
| ENSMUSG0000004267.16  | ENSMUSG0000004267.16  | ENSMUSG0000004267   | protein coding                     | Eno2          | 16.72728904  | 34.03519528 | -1.024339999   | 0.391023  | -2.619626 | 0.008026  | 0.0397204 |
| ENSMUSG00000030693.10 | ENSMUSG00000030693.10 | ENSMUSG00000030693  | protein coding                     | Klk10         | 263.0487939  | 632.5140748 | -1.26729094    | 0.1202346 | -10.38468 | 2.91E-25  | 2.022E-23 |
| ENSMUSG00000031303.8  | ENSMUSG00000031303.8  | ENSMUSG00000031303  | protein coding                     | Map3k15       | 28.66689509  | 79.00830072 | -1.467414306   | 0.3132769 | -4.684081 | 2.81E-06  | 3.308E-05 |
| ENSMUSG00000044349.15 | ENSMUSG00000044349.15 | ENSMUSG00000044349  | protein coding                     | Snhg11        | 33.10617089  | 14.99227834 | 1.145228682    | 0.4382547 | 2.631577  | 0.008971  | 0.0403422 |
| ENSMUSG00000013584.5  | ENSMUSG00000013584.5  | ENSMUSG00000013584  | protein coding                     | Alidn1a2      | 352.0912724  | 9.798163813 | 5.155242865    | 0.3186683 | 16.177475 | 7.27E-59  | 1.892E-56 |
| ENSMUSG00000085183.1  | ENSMUSG00000085183.1  | ENSMUSG00000085183  | lincRNA                            | Gm12603       | 405.1782258  | 869.3325249 | -1.011992852   | 0.1041375 | -10.58209 | 3.608E-26 | 2.615E-24 |
| ENSMUSG00000106933.1  | ENSMUSG00000106933.1  | ENSMUSG00000106933  | TEC                                | Gm43621       | 20.025509    | 4.950811423 | 2.012772884    | 0.6533465 | 3.8007123 | 0.0020651 | 0.0117795 |
| ENSMUSG00000091055.2  | ENSMUSG00000091055.2  | ENSMUSG00000091055  | protein coding                     | Siglec15      | 6.339056879  | 68.50176397 | -3.357006997   | 0.7733161 | -4.341054 | 1.418E-05 | 0.001444  |
| ENSMUSG0000001397.7   | ENSMUSG0000001397.7   | ENSMUSG0000001397   | protein coding                     | Klf7r9        | 38.91711303  | 0           | 6.736787548    | 1.2587068 | 6.0878773 | 1.236E-09 | 2.572E-08 |
| ENSMUSG00000041658.12 | ENSMUSG00000041658.12 | ENSMUSG00000041658  | protein coding                     | Ragab         | 28.51436868  | 0           | 7.190440417    | 1.2929859 | 5.534478  | 3.127E-08 | 5.163E-07 |
| ENSMUSG00000087660.1  | ENSMUSG00000087660.1  | ENSMUSG00000087660  | antisense_RNA                      | B230398E01Rik | 5.09001700   | 0           | 4.67705676     | 1.7820222 | 6.643796  | 0.0079454 | 0.0363935 |
| ENSMUSG00000017446.14 | ENSMUSG00000017446.14 | ENSMUSG00000017446  | protein coding                     | C1qln1f       | 17.09882368  | 1.29659816  | 3.644080737    | 1.0667267 | 3.326894  | 0.008915  | 0.056889  |
| ENSMUSG00000042797.9  | ENSMUSG00000042797.9  | ENSMUSG00000042797  | protein coding                     | Aqp11         | 44.0224729   | 20.92830323 | 1.087060139    | 0.3816928 | 2.7956007 | 0.0051803 | 0.025282  |
| ENSMUSG00000041390.18 | ENSMUSG00000041390.18 | ENSMUSG00000041390  | protein coding                     | Mdfic         | 619.1043254  | 159.1940451 | 1.959157774    | 0.1692263 | 11.574686 | 5.337E-31 | 5.106E-29 |
| ENSMUSG0000002076.11  | ENSMUSG0000002076.11  | ENSMUSG0000002076   | protein coding                     | Hsf2bp        | 26.6163534   | 10.87963433 | 1.285591895    | 0.4877793 | 2.6356014 | 0.003988  | 0.028156  |
| ENSMUSG00000059742.10 | ENSMUSG00000059742.10 | ENSMUSG00000059742  | protein coding                     | Kcnh7         | 84.11918228  | 195.7493951 | -1.223103581   | 0.2244384 | -5.496818 | 5.048E-08 | 7.993E-07 |
| ENSMUSG00000030268.17 | ENSMUSG00000030268.17 | ENSMUSG00000030268  | protein coding                     | Bcat1         | 121.9579201  | 378.3618871 | -1.631783064   | 0.1488187 | -10.96491 | 5.636E-28 | 4.394E-26 |
| ENSMUSG00000103292.1  | ENSMUSG00000103292.1  | ENSMUSG00000103292  | TEC                                | Gm35048       | 5.22972675   | 43.79621677 | -3.05897419    | 0.541447  | -6.549486 | 1.609E-08 | 2.764E-07 |
| ENSMUSG00000020566.19 | ENSMUSG00000020566.19 | ENSMUSG00000020566  | protein coding                     | Atp6v1c2      | 25.04387534  | 1.6207477   | 3.868517542    | 0.958912  | 4.0342778 | 5.477E-05 | 0.0004854 |
| ENSMUSG00000035356.16 | ENSMUSG00000035356.16 | ENSMUSG00000035356  | protein coding                     | Nfkibz        | 965.0742692  | 2321.302572 | -1.267262735   | 0.09227   | -13.7343  | 6.327E-43 | 9.505E-41 |
| ENSMUSG00000079173.11 | ENSMUSG00000079173.11 | ENSMUSG00000079173  | protein coding                     | Nr1           | 54.47910935  | 156.5026394 | -1.519266394   | 0.213684  | -7.109885 | 1.161E-12 | 3.37E-11  |
| ENSMUSG00000036181.2  | ENSMUSG00000036181.2  | ENSMUSG00000036181  | protein coding                     | Hist1hc       | 639.3563691  | 298.1781812 | 1.099810977    | 0.1245786 | 8.2825414 | 1.063E-18 | 5.038E-17 |
| ENSMUSG00000025810.9  | ENSMUSG00000025810.9  | ENSMUSG00000025810  | protein coding                     | Nrp1          | 203.1340478  | 705.247252  | -1.794641222   | 0.1240773 | -14.4639  | 2.049E-47 | 3.863E-45 |
| ENSMUSG00000049511.5  | ENSMUSG00000049511.5  | ENSMUSG00000049511  | protein coding                     | Htr1b         | 48.29441752  | 7.297300671 | 2.747750351    | 0.5763097 | 4.7673661 | 1.862E-06 | 2.267E-05 |
| ENSMUSG00000112468.1  | ENSMUSG00000112468.1  | ENSMUSG00000112468  | TEC                                | AC154734.2    | 12.4173564   | 0           | 5.988504216    | 1.4246148 | 4.2039565 | 2.627E-05 | 0.002523  |
| ENSMUSG00000059246.4  | ENSMUSG00000059246.4  | ENSMUSG00000059246  | protein coding                     | Foxb1         | 14.38662317  | 0           | 6.199354604    | 1.4080375 | 4.4028334 | 1.068E-05 | 0.000112  |
| ENSMUSG000000110631.1 | ENSMUSG000000110631.1 | ENSMUSG000000110631 | lincRNA                            | Gm42047       | 770.0843117  | 1637.354511 | -1.089062622   | 0.1182212 | -9.212079 | 3.199E-20 | 1.642E-18 |
| ENSMUSG00000037108.13 | ENSMUSG00000037108.13 | ENSMUSG00000037108  | protein coding                     | Zcwpv1        | 65.0716589   | 21.57460231 | 1.58201564     | 0.3782072 | 4.1829333 | 2.878E-05 | 0.0002734 |
| ENSMUSG00000038146.7  | ENSMUSG00000038146.7  | ENSMUSG00000038146  | protein coding                     | Notch3        | 14.17653394  | 54.32449406 | -1.940259324   | 0.4866189 | -3.987225 | 6.685E-05 | 0.0005799 |
| ENSMUSG00000041642.18 | ENSMUSG00000041642.18 | ENSMUSG00000041642  | antisense_RNA                      | Klf21b        | 102.4654308  | 36.78276548 | 1.471832737    | 0.3536631 | 4.1932325 | 3.192E-05 | 0.0002899 |
| ENSMUSG00000087623.1  | ENSMUSG00000087623.1  | ENSMUSG00000087623  | antisense_RNA                      | Gm15726       | 5.102581299  | 21.2142858  | -2.076438393   | 0.6698004 | -3.100085 | 0.0019346 | 0.0111124 |
| ENSMUSG00000036528.15 | ENSMUSG00000036528.15 | ENSMUSG00000036528  | protein coding                     | Ppp1b2        | 66.0564911   | 24.64059033 | 1.422154455    | 0.3281059 | 4.3344377 | 1.461E-05 | 0.0001484 |
| ENSMUSG00000045083.14 | ENSMUSG00000045083.14 | ENSMUSG00000045083  | protein coding                     | Line2         | 23.73932071  | 3.793696429 | 2.29367161     | 0.8575263 | 3.900665  | 6.589E-05 | 0.0008721 |
| ENSMUSG00000018965.8  | ENSMUSG00000018965.8  | ENSMUSG00000018965  | protein coding                     | Sulf4k1a      | 38.68604754  | 342.4072318 | -1.621440614   | 0.2071183 | -15.53914 | 1.895E-54 | 4.09E-62  |
| ENSMUSG00000021281.15 | ENSMUSG00000021281.15 | ENSMUSG00000021281  | protein coding                     | Tfnafp2       | 940.8550298  | 1883.848705 | -1.001361862   | 0.2557172 | -3.915896 | 9.007E-05 | 0.0007596 |
| ENSMUSG0000001804.9   | ENSMUSG0000001804.9   | ENSMUSG0000001804   | protein coding                     | Dsg4          | 7.234420171  | 21.29007303 | -1.567614032   | 0.5620447 | -2.789127 | 0.005285  | 0.0262378 |
| ENSMUSG0000002123.8   | ENSMUSG0000002123.8   | ENSMUSG0000002123   | protein coding                     | Scel          | 523.8917093  | 1745.569547 | -1.37750642    | 0.1077018 | -16.13265 | 1.506E-58 | 3.866E-56 |
| ENSMUSG00000032285.15 | ENSMUSG00000032285.15 | ENSMUSG00000032285  | protein coding                     | Dnajd4        | 316.6256568  | 129.2545691 | 1.289674049    | 0.1667214 | 7.7355056 | 1.03E-14  | 3.524E-13 |
| ENSMUSG0000001793.12  | ENSMUSG0000001793.12  | ENSMUSG0000001793   | transcribed_unprocessed_pseudogene | 2610005L07Rik | 4.99630991   | 46.93804579 | -3.218495771   | 1.1531276 | -2.79101  | 0.0052529 | 0.0292203 |
| ENSMUSG0000004196.15  | ENSMUSG0000004196.15  | ENSMUSG0000004196   | protein coding                     | Nkx2-1        | 535.4774088  | 8.10177166  | 6.04246478     | 0.3354542 | 18.012787 | 1.546E-72 | 6.126E-70 |
| ENSMUSG00000015243.4  | ENSMUSG00000015243.4  | ENSMUSG00000015243  | protein coding                     | Abca1         | 22.07313291  | 1.49239033  | 3.938440952    | 1.0322665 | 3.8152627 | 0.001266  | 0.010924  |
| ENSMUSG00000026787.3  | ENSMUSG00000026787.3  | ENSMUSG00000026787  | protein coding                     | Gad2          | 89.1964905   | 20.64177395 | 2.126188517    | 0.3502295 | 6.0691099 | 1.286E-09 | 2.556E-08 |
| ENSMUSG0000002617.14  | ENSMUSG0000002617.14  | ENSMUSG0000002617   | protein coding                     | Zfp40         | 77.09113572  | 259.8509923 | -1.753136639   | 0.1800837 | -9.735123 | 2.136E-22 | 1.241E-20 |
| ENSMUSG00000082051.1  | ENSMUSG0000008        |                     |                                    |               |              |             |                |           |           |           |           |





|                      |                      |                      |                        |               |             |             |              |           |           |            |           |
|----------------------|----------------------|----------------------|------------------------|---------------|-------------|-------------|--------------|-----------|-----------|------------|-----------|
| ENSMUSG0000025347.4  | ENSMUSG0000025347.4  | ENSMUSG0000025347.4  | protein coding         | Mettl7b       | 141.7434891 | 16.77799598 | 3.082821663  | 0.3350741 | 9.2167134 | 3.06320    | 1.581E-18 |
| ENSMUSG0000000693.10 | ENSMUSG0000000693.10 | ENSMUSG0000000693.10 | protein coding         | Lox3          | 54.38499291 | 15.46291106 | 1.812185184  | 0.3771801 | 4.8045624 | 1.551E-06  | 1.914E-05 |
| ENSMUSG0000050052.12 | ENSMUSG0000050052.12 | ENSMUSG0000050052.12 | protein coding         | Tdrp          | 89.43750313 | 362.8497863 | -0.202685386 | 0.1505743 | -13.42079 | 4.568E-41  | 6.949E-39 |
| ENSMUSG0000059901.12 | ENSMUSG0000059901.12 | ENSMUSG0000059901.12 | protein coding         | Adamts14      | 40.29385621 | 4.681172813 | 3.117398561  | 0.6518489 | 4.7823501 | 1.733E-06  | 2.126E-05 |
| ENSMUSG0000074604.9  | ENSMUSG0000074604.9  | ENSMUSG0000074604.9  | protein coding         | Mgsl2         | 136.176439  | 7.6363049   | 4.137545837  | 0.4024504 | 10.280884 | 8.594E-25  | 5.817E-23 |
| ENSMUSG0000020770.14 | ENSMUSG0000020770.14 | ENSMUSG0000020770.14 | protein coding         | Lrp2          | 16.34199289 | 3017.521397 | -7.52457161  | 0.2441152 | -29.61087 | 1.08E-192  | 2.22E-18  |
| ENSMUSG0000038253.6  | ENSMUSG0000038253.6  | ENSMUSG0000038253.6  | protein coding         | Hoxa5         | 6.772062124 | 0           | 5.116969456  | 1.6112426 | 3.1757827 | 0.0104943  | 0.0088957 |
| ENSMUSG0000005580.11 | ENSMUSG0000005580.11 | ENSMUSG0000005580.11 | protein coding         | Adcy9         | 12.03313134 | 30.75407962 | -1.352053723 | 0.4532215 | -2.983207 | 0.0248254  | 0.0155159 |
| ENSMUSG0000060738.4  | ENSMUSG0000060738.4  | ENSMUSG0000060738.4  | protein coding         | Pfif7c1       | 0           | 9.765904494 | -8.838010198 | 1.5136331 | -3.856952 | 0.0001148  | 0.0009399 |
| ENSMUSG0000006386.15 | ENSMUSG0000006386.15 | ENSMUSG0000006386.15 | protein coding         | Tek           | 0           | 49.68653757 | -8.182665409 | 1.2453596 | -6.570952 | 5.01E-11   | 1.182E-09 |
| ENSMUSG0000027230.9  | ENSMUSG0000027230.9  | ENSMUSG0000027230.9  | protein coding         | Creb3l1       | 14.36316018 | 10.97244862 | 3.793111909  | 1.1497596 | 3.2990479 | 0.0009701  | 0.0061035 |
| ENSMUSG0000039529.8  | ENSMUSG0000039529.8  | ENSMUSG0000039529.8  | protein coding         | Atp3b1        | 1428.09097  | 468.0200685 | 1.60760544   | 0.1213184 | 13.251128 | 4.4445E-40 | 6.939E-38 |
| ENSMUSG0000048482.14 | ENSMUSG0000048482.14 | ENSMUSG0000048482.14 | protein coding         | Bdnf          | 615.447401  | 1274.68578  | -1.05138402  | 0.1123702 | 9.366469  | 8.245E-21  | 4.378E-19 |
| ENSMUSG0000031758.10 | ENSMUSG0000031758.10 | ENSMUSG0000031758.10 | protein coding         | Cydv2         | 112.8003025 | 33.52749751 | 1.750824433  | 0.3245256 | 3.95024   | 6.851E-08  | 1.058E-06 |
| ENSMUSG0000034353.14 | ENSMUSG0000034353.14 | ENSMUSG0000034353.14 | protein coding         | Ramp1         | 16.675119   | 38.86894393 | 1.807588448  | 0.3412303 | 5.2972677 | 1.175E-07  | 1.749E-06 |
| ENSMUSG000004927.6   | ENSMUSG000004927.6   | ENSMUSG000004927.6   | protein coding         | H1fx          | 171.501397  | 0           | 9.77655226   | 1.1983472 | 8.1583409 | 3.937E-16  | 1.347E-14 |
| ENSMUSG0000020160.18 | ENSMUSG0000020160.18 | ENSMUSG0000020160.18 | protein coding         | Meis1         | 8.06097764  | 72.21981594 | -3.165534992 | 0.4603194 | -6.876283 | 6.12E-12   | 1.618E-10 |
| ENSMUSG0000097754.1  | ENSMUSG0000097754.1  | ENSMUSG0000097754.1  | lincRNA                | Ptgs2os1      | 786.7917487 | 216.4051833 | 1.863478499  | 0.1259012 | 14.80122  | 1.441E-49  | 2.893E-47 |
| ENSMUSG0000027797.15 | ENSMUSG0000027797.15 | ENSMUSG0000027797.15 | protein coding         | Dclk1         | 262.5097892 | 102.1316023 | 1.36256052   | 0.1679278 | 8.1102562 | 5.051E-16  | 1.961E-14 |
| ENSMUSG0000026249.10 | ENSMUSG0000026249.10 | ENSMUSG0000026249.10 | protein coding         | Serpine2      | 497.1669477 | 1704.017283 | -1.776081    | 0.0944131 | -18.818   | 6.045E-79  | 2.376E-76 |
| ENSMUSG0000070280.13 | ENSMUSG0000070280.13 | ENSMUSG0000070280.13 | protein coding         | Slc22a14      | 5.998121192 | 0           | 4.944517021  | 1.8055041 | 2.7385797 | 0.061705   | 0.0298011 |
| ENSMUSG0000031750.15 | ENSMUSG0000031750.15 | ENSMUSG0000031750.15 | protein coding         | Ij34          | 431.038764  | 105.2647558 | 0.234096122  | 0.156631  | 12.966553 | 1.458E-38  | 1.821E-36 |
| ENSMUSG0000097165.1  | ENSMUSG0000097165.1  | ENSMUSG0000097165.1  | lincRNA                | Z210008F06Rik | 84.40219107 | 37.4391054  | 1.165333801  | 0.2872995 | 4.056164  | 4.998E-05  | 0.0044698 |
| ENSMUSG0000047253.4  | ENSMUSG0000047253.4  | ENSMUSG0000047253.4  | protein coding         | Krtap1-5      | 21.2463843  | 6.388690783 | 1.738635406  | 0.5666857 | 3.080754  | 0.021544   | 0.012219  |
| ENSMUSG0000093908.2  | ENSMUSG0000093908.2  | ENSMUSG0000093908.2  | lincRNA                | Gm5784        | 21.15280323 | 0.735069349 | 4.896021656  | 1.1927117 | 4.1049498 | 4.044E-05  | 0.0003708 |
| ENSMUSG0000024593.15 | ENSMUSG0000024593.15 | ENSMUSG0000024593.15 | protein coding         | Megf10        | 236.4365797 | 20.99750291 | 3.484610441  | 0.2761376 | 12.61911  | 1.657E-36  | 1.913E-34 |
| ENSMUSG0000113348.1  | ENSMUSG0000113348.1  | ENSMUSG0000113348.1  | unprocessed_pseudogene | AC097644.5    | 0           | 15.05378929 | -6.456530566 | 1.4125656 | -4.570786 | 4.859E-06  | 5.451E-05 |
| ENSMUSG0000057143.15 | ENSMUSG0000057143.15 | ENSMUSG0000057143.15 | protein coding         | Trim12c       | 78.07597213 | 26.0996322  | 1.580162396  | 0.3243222 | 4.8722018 | 1.104E-06  | 1.406E-05 |
| ENSMUSG0000030030.10 | ENSMUSG0000030030.10 | ENSMUSG0000030030.10 | protein coding         | Add2          | 41.06989883 | 126.0248794 | -1.612004498 | 0.2520468 | -6.395658 | 1.599E-10  | 3.521E-09 |
| ENSMUSG0000090125.3  | ENSMUSG0000090125.3  | ENSMUSG0000090125.3  | protein coding         | Pou3f1        | 2.79679915  | 43.91208852 | -3.980725098 | 0.6512783 | -6.112173 | 9.828E-10  | 1.978E-08 |
| ENSMUSG0000025790.14 | ENSMUSG0000025790.14 | ENSMUSG0000025790.14 | protein coding         | Slic3oa1      | 658.7929384 | 204.9368173 | 1.687098641  | 0.2657499 | 6.348444  | 2.175E-10  | 4.734E-09 |
| ENSMUSG0000024600.8  | ENSMUSG0000024600.8  | ENSMUSG0000024600.8  | protein coding         | Slc27a6       | 32.264534   | 13.21611591 | 1.2960638    | 0.4770101 | 2.7170572 | 0.0065885  | 0.0313271 |
| ENSMUSG0000105366.1  | ENSMUSG0000105366.1  | ENSMUSG0000105366.1  | TEC                    | Gm43719       | 47.63305981 | 22.55997478 | 1.074502085  | 0.377802  | 2.8440893 | 0.0044539  | 0.0226219 |
| ENSMUSG0000012017.3  | ENSMUSG0000012017.3  | ENSMUSG0000012017.3  | protein coding         | Scaf2         | 267.2947945 | 540.9026894 | -1.018960043 | 0.1213867 | -8.38347  | 5.843E-17  | 2.444E-15 |
| ENSMUSG0000055416.7  | ENSMUSG0000055416.7  | ENSMUSG0000055416.7  | protein coding         | Alp19b        | 10.78742351 | 317.010245  | -4.873167167 | 0.3042813 | -16.01634 | 9.937E-58  | 2.494E-55 |
| ENSMUSG0000104781.1  | ENSMUSG0000104781.1  | ENSMUSG0000104781.1  | lincRNA                | Gm43303       | 28.6592237  | 26.8502237  | -2.8248265   | 1.197232  | 5.518189  | 3.425E-08  | 5.618E-07 |
| ENSMUSG000010662.1   | ENSMUSG000010662.1   | ENSMUSG000010662.1   | TEC                    | Gm43034       | 6.316272309 | 9.863800579 | 1.678960864  | 0.4648072 | 3.6121661 | 0.0003036  | 0.0222026 |
| ENSMUSG0000050357.9  | ENSMUSG0000050357.9  | ENSMUSG0000050357.9  | protein coding         | Carmil2       | 6.82599657  | 18.84192281 | -1.464539992 | 0.5642633 | -2.595508 | 0.0094451  | 0.0203985 |
| ENSMUSG0000019102.10 | ENSMUSG0000019102.10 | ENSMUSG0000019102.10 | protein coding         | Aldh3a1       | 23.72788519 | 54.19596788 | -1.180250393 | 0.3696023 | -3.193299 | 0.014066   | 0.00465   |
| ENSMUSG0000030559.8  | ENSMUSG0000030559.8  | ENSMUSG0000030559.8  | protein coding         | Rab38         | 338.6141524 | 76.67249905 | 2.142835664  | 0.1730322 | 12.384027 | 3.199E-35  | 3.948E-33 |
| ENSMUSG0000043924.16 | ENSMUSG0000043924.16 | ENSMUSG0000043924.16 | protein coding         | Ncmap         | 210.3656791 | 96.45281312 | 1.123572488  | 0.183363  | 6.127577  | 8.923E-10  | 1.816E-08 |
| ENSMUSG0000000409.14 | ENSMUSG0000000409.14 | ENSMUSG0000000409.14 | protein coding         | Lck           | 23.7167844  | 5.195551616 | 2.2191157    | 0.8647609 | 2.5578302 | 0.0105328  | 0.0040706 |
| ENSMUSG0000016494.9  | ENSMUSG0000016494.9  | ENSMUSG0000016494.9  | protein coding         | Cd34          | 191.6904408 | 74.24771858 | 1.367185908  | 0.1976535 | 6.9170851 | 4.61E-12   | 1.24E-10  |
| ENSMUSG0000042256.4  | ENSMUSG0000042256.4  | ENSMUSG0000042256.4  | protein coding         | Pltcd4        | 8.445929462 | 148.3668104 | -4.147829599 | 0.3595441 | -11.53636 | 8.651E-31  | 7.76E-29  |
| ENSMUSG0000040612.13 | ENSMUSG0000040612.13 | ENSMUSG0000040612.13 | protein coding         | Idr2          | 0           | 17.00869421 | -6.63513824  | 1.3960884 | -4.752646 | 2.008E-06  | 2.431E-05 |
| ENSMUSG0000035799.6  | ENSMUSG0000035799.6  | ENSMUSG0000035799.6  | protein coding         | Twist1        | 176.5825131 | 68.14603501 | 1.374623679  | 0.2041746 | 6.7325906 | 1.67E-11   | 4.22E-10  |
| ENSMUSG0000108905.1  | ENSMUSG0000108905.1  | ENSMUSG0000108905.1  | lincRNA                | Gm44618       | 0           | 6.08306116  | -5.159759311 | 1.8840586 | -2.736517 | 0.002693   | 0.299606  |
| ENSMUSG0000024529.13 | ENSMUSG0000024529.13 | ENSMUSG0000024529.13 | protein coding         | Lox           | 552.168472  | 47.8893317  | 3.5173253    | 0.1866078 | 18.84875  | 3.008E-79  | 1.208E-76 |
| ENSMUSG0000024766.14 | ENSMUSG0000024766.14 | ENSMUSG0000024766.14 | protein coding         | Lipo3         | 67.5384988  | 42.735531   | 1.039209278  | 0.2607572 | 3.9853518 | 6.738E-05  | 0.005835  |
| ENSMUSG0000053414.7  | ENSMUSG0000053414.7  | ENSMUSG0000053414.7  | protein coding         | Hunk          | 189.8525216 | 37.08449458 | 2.363000824  | 0.2433384 | 10.08374  | 6.519E-24  | 4.287E-22 |
| ENSMUSG0000048572.4  | ENSMUSG0000048572.4  | ENSMUSG0000048572.4  | protein coding         | Tmem252       | 97.3002007  | 0           | 8.958970535  | 1.2114088 | 7.3954975 | 1.409E-13  | 4.331E-12 |
| ENSMUSG0000024885.8  | ENSMUSG0000024885.8  | ENSMUSG0000024885.8  | protein coding         | Aldh3b1       | 92.19305515 | 42.92474921 | 1.103249491  | 0.2903939 | 3.7991487 | 0.001452   | 0.0015589 |
| ENSMUSG0000041515.9  | ENSMUSG0000041515.9  | ENSMUSG0000041515.9  | protein coding         | Irf8          | 14.0824175  | 3.507369116 | 2.02434407   | 0.7916906 | 2.5293313 | 0.0114286  | 0.0492665 |
| ENSMUSG0000022759.13 | ENSMUSG0000022759.13 | ENSMUSG0000022759.13 | protein coding         | Lrrc74b       | 5.288616393 | 0           | 4.756638392  | 1.7195353 | 7.762348  | 0.0056708  | 0.0277869 |
| ENSMUSG0000036585.15 | ENSMUSG0000036585.15 | ENSMUSG0000036585.15 | protein coding         | Fgf1          | 255.8472914 | 57.57206346 | 2.151116135  | 0.1850313 | 11.62659  | 3.051E-31  | 2.805E-29 |
| ENSMUSG0000047735.14 | ENSMUSG0000047735.14 | ENSMUSG0000047735.14 | protein coding         | Samd9l        | 174.9135839 | 349.0316728 | -1.072231548 | 0.110384  | 9.6742092 | 3.881E-22  | 2.213E-20 |
| ENSMUSG0000022332.7  | ENSMUSG0000022332.7  | ENSMUSG0000022332.7  | protein coding         | Kndrb3        | 8.211441694 | 129.9117577 | -3.967378642 | 0.3825305 | -10.37141 | 3.346E-25  | 2.307E-23 |
| ENSMUSG0000097159.1  | ENSMUSG0000097159.1  | ENSMUSG0000097159.1  | lincRNA                | Gm26517       | 48.4363955  | 12.82431517 | 1.903142536  | 0.4471692 | 4.2599789 | 2.081E-05  | 0.0002049 |
| ENSMUSG0000026899.4  | ENSMUSG0000026899.4  | ENSMUSG0000026899.4  | protein coding         | Ijbr3         | 531.0376582 | 118.6239509 | 2.166939597  | 1.1405961 | 15.418959 | 1.279E-53  | 3.177E-51 |
| ENSMUSG0000033705.16 | ENSMUSG0000033705.16 | ENSMUSG0000033705.16 | protein coding         | Slard9        | 96.1156464  | 249.1605689 | -1.17873936  | 0.2105504 | 6.6155622 | 7.23E-11   | 1.873E-09 |
| ENSMUSG0000107134.1  | ENSMUSG0000107134.1  | ENSMUSG0000107134.1  | TEC                    | Gm42528       | 13.18521537 | 29.29951152 | -1.146573454 | 0.4401371 | -2.805037 | 0.0091864  | 0.0014108 |
| ENSMUSG0000026535.9  | ENSMUSG0000026535.9  | ENSMUSG0000026535.9  | protein coding         | Irf202b       | 4.413905688 | 147.4172933 | -5.00782552  | 0.49674   | -10.08138 | 6.878E-24  | 4.356E-22 |
| ENSMUSG0000055421.8  | ENSMUSG0000055421.8  | ENSMUSG0000055421.8  | protein coding         | Pcdh9         | 114.0041081 | 508.5646308 | -2.15698233  | 0.2106057 | -10.24123 | 2.96E-24   | 8.707E-23 |
| ENSMUSG0000029659.16 | ENSMUSG0000029659.16 | ENSMUSG0000029659.16 | protein coding         | Medag         | 125.1681351 | 48.83311854 | 1.36805837   | 0.2548861 | 5.3394438 | 9.323E-08  | 1.417E-06 |
| ENSMUSG0000024810.16 | ENSMUSG0000024810.16 | ENSMUSG0000024810.16 | protein coding         | Ij33          | 160.4677123 | 80.05775361 | 1.00665564   | 0.2447432 | 4.1131102 | 3.904E-05  | 0.0003587 |
| ENSMUSG0000092060.4  | ENSMUSG0000092060.4  | ENSMUSG0000092060.4  | protein coding         | Bend4         | 153.1463995 | 918.4954565 | -2.580389884 | 0.1516842 | -17.01158 | 6.739E-65  | 2.111E-62 |
| ENSMUSG0000051279.2  | ENSMUSG0000051279.2  | ENSMUSG0000051279.2  | protein coding         | Gdf6          | 15.05929005 | 0           | 6.17075721   | 1.4267842 | 4.3249409 | 1.526E-05  |           |



|                       |                       |                       |                      |               |              |             |              |            |           |           |           |
|-----------------------|-----------------------|-----------------------|----------------------|---------------|--------------|-------------|--------------|------------|-----------|-----------|-----------|
| ENSMUSG0000002792.11  | ENSMUSG0000002792.11  | ENSMUSG0000002792.11  | protein coding       | Bche          | 0            | 7.56249448  | -5.462713274 | 1.6553785  | -3.299978 | 0.009699  | 0.0060785 |
| ENSMUSG00000060445.11 | ENSMUSG00000060445.11 | ENSMUSG00000060445.11 | protein coding       | Sypc2         | 0            | 4.907426268 | -4.844187437 | 1.7690703  | -2.738267 | 0.0061764 | 0.0298216 |
| ENSMUSG00000024039.14 | ENSMUSG00000024039.14 | ENSMUSG00000024039.14 | protein coding       | Cbs           | 30.38971922  | 144.6906149 | -2.245153667 | 0.2570577  | -8.734048 | 2.457E-18 | 1.127E-16 |
| ENSMUSG00000026872.17 | ENSMUSG00000026872.17 | ENSMUSG00000026872.17 | protein coding       | Zeb2          | 282.77132168 | 68.81366956 | -2.036605959 | 2.3265431  | 8.609875  | 7.314E-18 | 3.257E-16 |
| ENSMUSG00000026664.7  | ENSMUSG00000026664.7  | ENSMUSG00000026664.7  | protein coding       | Phyh          | 152.4564629  | 62.28926047 | 1.287791716  | 0.2076212  | 6.2026099 | 5.554E-10 | 1.153E-08 |
| ENSMUSG00000031621.9  | ENSMUSG00000031621.9  | ENSMUSG00000031621.9  | protein coding       | Isx           | 7.11016603   | 5.25116603  | 5.20899513   | 1.8029616  | 2.8890772 | 0.0038637 | 0.0020264 |
| ENSMUSG00000029561.17 | ENSMUSG00000029561.17 | ENSMUSG00000029561.17 | protein coding       | Oasl2         | 34.39690842  | 8.756533647 | 1.969034587  | 0.4873454  | 4.0403267 | 5.338E-05 | 0.0040737 |
| ENSMUSG00000054752.16 | ENSMUSG00000054752.16 | ENSMUSG00000054752.16 | protein coding       | Fsd11         | 98.33982893  | 382.3943503 | -1.963539143 | 0.176691   | -11.11284 | 1.086E-28 | 8.729E-27 |
| ENSMUSG00000034422.14 | ENSMUSG00000034422.14 | ENSMUSG00000034422.14 | protein coding       | Parp14        | 157.310566   | 32.0673665  | 2.29190422   | 0.2609418  | 8.7831931 | 1.589E-18 | 7.336E-17 |
| ENSMUSG00000045106.12 | ENSMUSG00000045106.12 | ENSMUSG00000045106.12 | protein coding       | Ccdc73        | 42.9116849   | 91.75633913 | -1.09426144  | 0.286409   | -3.821898 | 0.001324  | 0.0010682 |
| ENSMUSG00000086813.1  | ENSMUSG00000086813.1  | ENSMUSG00000086813.1  | processed_transcript | Gm13857       | 8.013307318  | 27.43958951 | -1.77434571  | 0.555401   | -3.194871 | 0.0013989 | 0.0084173 |
| ENSMUSG00000024442.14 | ENSMUSG00000024442.14 | ENSMUSG00000024442.14 | protein coding       | Nfasc         | 196.5203715  | 68.16443368 | 1.574810448  | 0.2323041  | 7.0545778 | 4.877E-11 | 4.877E-11 |
| ENSMUSG0000007989.7   | ENSMUSG0000007989.7   | ENSMUSG0000007989.7   | protein coding       | Fzd3          | 100.5293752  | 287.8286876 | -1.51938215  | -0.1936991 | -8.47705  | 2.439E-17 | 1.053E-15 |
| ENSMUSG0000071324.11  | ENSMUSG0000071324.11  | ENSMUSG0000071324.11  | protein coding       | Armc2         | 9.738920374  | 29.0547713  | -1.59022116  | 0.5072532  | -3.134968 | 0.0017187 | 0.0010598 |
| ENSMUSG0000097861.1   | ENSMUSG0000097861.1   | ENSMUSG0000097861.1   | lincRNA              | Gm26858       | 48.4904524   | 0           | 9.765000064  | 1.2493537  | 6.3672925 | 1.924E-10 | 4.192E-09 |
| ENSMUSG0000027339.15  | ENSMUSG0000027339.15  | ENSMUSG0000027339.15  | protein coding       | Rassf2        | 204.1451138  | 39.28166178 | 2.3703577    | 0.2407489  | 9.856936  | 6.394E-23 | 3.887E-21 |
| ENSMUSG0000033579.16  | ENSMUSG0000033579.16  | ENSMUSG0000033579.16  | protein coding       | Fa2h          | 8.305022576  | 31.18168815 | -1.903210634 | 0.4884576  | -3.896368 | 9.765E-05 | 0.008142  |
| ENSMUSG0000028949.13  | ENSMUSG0000028949.13  | ENSMUSG0000028949.13  | protein coding       | Smarcd3       | 122.2358883  | 270.4375732 | -1.144446537 | 0.2409133  | -4.75045  | 0.203E-10 | 2.454E-05 |
| ENSMUSG0000045648.15  | ENSMUSG0000045648.15  | ENSMUSG0000045648.15  | protein coding       | Vmwc2         | 0            | 4.950811403 | -4.854948527 | 1.7601131  | -2.758316 | 0.058E-02 | 0.0028319 |
| ENSMUSG000005364.11   | ENSMUSG000005364.11   | ENSMUSG000005364.11   | protein coding       | Ilfra         | 629.6250077  | 106.0879552 | 1.114840656  | 0.2455286  | 4.5405726 | 5.61E-06  | 6.241E-05 |
| ENSMUSG0000021403.3   | ENSMUSG0000021403.3   | ENSMUSG0000021403.3   | protein coding       | Serpinc9b     | 236.693386   | 3598.558859 | -2.49854696  | 0.072694   | -2.33552  | 2.22E-22  | 6.822E-05 |
| ENSMUSG0000038286.11  | ENSMUSG0000038286.11  | ENSMUSG0000038286.11  | protein coding       | Bph1          | 170.5623748  | 78.66369758 | 1.1882558    | 0.204996   | 5.457917  | 4.821E-08 | 7.666E-07 |
| ENSMUSG0000011343.1   | ENSMUSG0000011343.1   | ENSMUSG0000011343.1   | TEC                  | AC159819.3    | 14.51396855  | 4.215742054 | 1.779177026  | 0.6878793  | 2.586437  | 0.0096974 | 0.0429738 |
| ENSMUSG0000045518.18  | ENSMUSG0000045518.18  | ENSMUSG0000045518.18  | protein coding       | Oncu2         | 3.72753232   | 162.7807796 | -5.453418436 | 0.4714005  | -11.57739 | 5.366E-31 | 4.848E-29 |
| ENSMUSG0000058427.10  | ENSMUSG0000058427.10  | ENSMUSG0000058427.10  | protein coding       | Cxcl12        | 46.69291872  | 12.62052975 | 1.882628571  | 0.471304   | 9.938627  | 6.501E-05 | 0.005648  |
| ENSMUSG0000010297.1   | ENSMUSG0000010297.1   | ENSMUSG0000010297.1   | TEC                  | Gm17244       | 4.100770099  | 27.82397872 | -2.779745612 | 0.8093815  | -3.434407 | 0.005939  | 0.0039643 |
| ENSMUSG0000032281.11  | ENSMUSG0000032281.11  | ENSMUSG0000032281.11  | protein coding       | Acsbg1        | 2171.71999   | 1047.3538   | 1.052647834  | 1.008844   | 10.434195 | 1.731E-25 | 1.225E-23 |
| ENSMUSG00000330615.15 | ENSMUSG00000330615.15 | ENSMUSG00000330615.15 | protein coding       | Gas7          | 259.5831595  | 75.50161151 | 1.784017341  | 0.1722856  | 10.354997 | 3.972E-25 | 2.718E-23 |
| ENSMUSG000001506.10   | ENSMUSG000001506.10   | ENSMUSG000001506.10   | protein coding       | Col1a1        | 431.8896732  | 35.39939705 | 3.59632379   | 0.2566949  | 14.010112 | 1.352E-44 | 2.25E-42  |
| ENSMUSG0000032854.12  | ENSMUSG0000032854.12  | ENSMUSG0000032854.12  | protein coding       | Utg8a         | 3.716004995  | 18.7921758  | -2.334779491 | 0.7982876  | -9.294735 | 0.0034475 | 0.0181283 |
| ENSMUSG0000034793.15  | ENSMUSG0000034793.15  | ENSMUSG0000034793.15  | protein coding       | G6pc3         | 290.363106   | 104.3256846 | 1.476832292  | 1.5171254  | 9.3990667 | 5.505E-21 | 2.948E-19 |
| ENSMUSG0000043811.5   | ENSMUSG0000043811.5   | ENSMUSG0000043811.5   | protein coding       | Rtm4r         | 83.94079529  | 40.81811715 | 1.042085669  | 0.27428    | 3.7993487 | 0.001451  | 0.0015885 |
| ENSMUSG0000043782.8   | ENSMUSG0000043782.8   | ENSMUSG0000043782.8   | protein coding       | Bicoid2       | 37.97147548  | 80.49401001 | -1.07866328  | 0.2870034  | -3.758366 | 0.001771  | 0.0013385 |
| ENSMUSG000007892.13   | ENSMUSG000007892.13   | ENSMUSG000007892.13   | protein coding       | Pcdh18        | 284.1953538  | 51.28974794 | 2.471918041  | 0.5132625  | 7.8442087 | 4.387E-15 | 1.503E-13 |
| ENSMUSG0000044095.13  | ENSMUSG0000044095.13  | ENSMUSG0000044095.13  | protein coding       | Gcl2          | 88.52243714  | 207.3240519 | -1.281392828 | 0.1848183  | -8.474389 | 9.52E-11  | 2.168E-09 |
| ENSMUSG0000044162.12  | ENSMUSG0000044162.12  | ENSMUSG0000044162.12  | protein coding       | Trip3         | 110.7664497  | 32.2136925  | 1.781833331  | 0.2572803  | 6.6256879 | 4.342E-12 | 1.173E-10 |
| ENSMUSG0000039934.12  | ENSMUSG0000039934.12  | ENSMUSG0000039934.12  | protein coding       | Gasp          | 64.70436814  | 12.67714462 | 2.309977973  | 0.487611   | 4.9395669 | 7.814E-07 | 1.022E-05 |
| ENSMUSG0000110710.11  | ENSMUSG0000110710.11  | ENSMUSG0000110710.11  | lincRNA              | C78859        | 13.5116218   | 32.92146544 | -1.729024113 | 0.419612   | -3.048105 | 0.0032029 | 0.0112616 |
| ENSMUSG0000039114.16  | ENSMUSG0000039114.16  | ENSMUSG0000039114.16  | protein coding       | Nm1           | 417.0098591  | 1333.162351 | -1.677823155 | 0.1130753  | -14.8381  | 8.307E-50 | 1.687E-47 |
| ENSMUSG0000026620.11  | ENSMUSG0000026620.11  | ENSMUSG0000026620.11  | protein coding       | Mark1         | 0            | 5.182627766 | -4.92570947  | 1.788932   | -2.753436 | 0.0059873 | 0.0286917 |
| ENSMUSG0000010686.1   | ENSMUSG0000010686.1   | ENSMUSG0000010686.1   | antisense_RNA        | Gm43352       | 1.86378661   | 10.93414528 | -2.557060148 | 0.8945852  | -2.858375 | 0.0032662 | 0.0217959 |
| ENSMUSG0000002997.15  | ENSMUSG0000002997.15  | ENSMUSG0000002997.15  | protein coding       | Pkrar2b       | 596.9887052  | 264.5131673 | 1.174271282  | 0.1869173  | 6.2823053 | 3.458E-10 | 7.093E-09 |
| ENSMUSG0000020159.8   | ENSMUSG0000020159.8   | ENSMUSG0000020159.8   | protein coding       | Gapr          | 96.95479182  | 12.98874433 | 2.914313797  | 0.4622256  | 6.3045789 | 2.89E-10  | 6.202E-09 |
| ENSMUSG0000041482.16  | ENSMUSG0000041482.16  | ENSMUSG0000041482.16  | protein coding       | Piez2         | 282.5803708  | 118.169646  | 1.260386627  | 0.6173134  | 7.5330853 | 4.966E-14 | 1.612E-12 |
| ENSMUSG000002157.8    | ENSMUSG000002157.8    | ENSMUSG000002157.8    | protein coding       | Mcp8b         | 18.7826255   | 80.7876927  | 2.410410531  | 0.1597752  | 15.086266 | 1.994E-51 | 4.285E-49 |
| ENSMUSG0000011589.8   | ENSMUSG0000011589.8   | ENSMUSG0000011589.8   | protein coding       | Fsd1          | 4.816460617  | 34.49950791 | -4.22766529  | 0.9513705  | -4.443763 | 8.44E-06  | 9.42E-05  |
| ENSMUSG0000025232.8   | ENSMUSG0000025232.8   | ENSMUSG0000025232.8   | protein coding       | Hexa          | 340.3716121  | 79.67328852 | 2.093941908  | 0.1797185  | 11.651233 | 2.62E-31  | 2.1E-29   |
| ENSMUSG0000024225.15  | ENSMUSG0000024225.15  | ENSMUSG0000024225.15  | protein coding       | Enpp2         | 72.08817678  | 5.814238122 | 3.301534498  | 0.6325248  | 5.7078462 | 1.144E-08 | 2.006E-07 |
| ENSMUSG0000030748.9   | ENSMUSG0000030748.9   | ENSMUSG0000030748.9   | protein coding       | Ilfra         | 1863.750488  | 892.1363843 | 1.062354146  | 0.2146991  | 4.9481067 | 7.494E-07 | 9.835E-06 |
| ENSMUSG0000051710.6   | ENSMUSG0000051710.6   | ENSMUSG0000051710.6   | protein coding       | Prf3d1        | 1.747078268  | 19.40901453 | -3.431630683 | 1.0907932  | -3.145996 | 0.0016552 | 0.0079467 |
| ENSMUSG0000044367.7   | ENSMUSG0000044367.7   | ENSMUSG0000044367.7   | protein coding       | Slc16a13      | 15.11209038  | 41.91627639 | 1.850976445  | 0.2658788  | 6.9617313 | 3.61E-12  | 1.988E-11 |
| ENSMUSG0000051022.7   | ENSMUSG0000051022.7   | ENSMUSG0000051022.7   | protein coding       | Hs3st1        | 89.06543294  | 278.2697514 | -1.64505812  | 0.1688293  | -9.743917 | 1.959E-22 | 1.142E-20 |
| ENSMUSG0000050545.16  | ENSMUSG0000050545.16  | ENSMUSG0000050545.16  | protein coding       | Chd5          | 21.45667346  | 52.77186106 | -1.303588114 | 0.3403996  | -3.829683 | 0.001283  | 0.001038  |
| ENSMUSG0000057967.12  | ENSMUSG0000057967.12  | ENSMUSG0000057967.12  | protein coding       | Cfd1          | 7.31471751   | 25.37009678 | -1.784121607 | 0.5312311  | -3.358446 | 0.0007838 | 0.0005605 |
| ENSMUSG0000028451.12  | ENSMUSG0000028451.12  | ENSMUSG0000028451.12  | protein coding       | 1700222111Rik | 3.104601813  | 13.88885209 | -2.174896541 | 0.8046783  | -2.707289 | 0.0067835 | 0.030278  |
| ENSMUSG0000104718.1   | ENSMUSG0000104718.1   | ENSMUSG0000104718.1   | lincRNA              | Gm31752       | 17.31077516  | 63.46862708 | -1.886386162 | 0.3744294  | -0.038029 | 4.704E-07 | 8.642E-06 |
| ENSMUSG0000105053.1   | ENSMUSG0000105053.1   | ENSMUSG0000105053.1   | protein coding       | Gm43084       | 1.571757819  | 346.8292848 | -1.012947165 | 0.1884182  | -5.376057 | 7.613E-08 | 1.169E-06 |
| ENSMUSG0000043422.7   | ENSMUSG0000043422.7   | ENSMUSG0000043422.7   | protein coding       | Chchd10       | 439.5275466  | 209.820274  | 1.086984795  | 0.1382937  | 7.7153523 | 1.206E-14 | 4.113E-13 |
| ENSMUSG0000091007.1   | ENSMUSG0000091007.1   | ENSMUSG0000091007.1   | protein coding       | D3E036H23Rik  | 4.259127188  | 4.83700750  | 1.8356219    | 2.528124   | 0.0115329 | 0.0486748 | 0.0097678 |
| ENSMUSG0000032702.16  | ENSMUSG0000032702.16  | ENSMUSG0000032702.16  | protein coding       | Kank1         | 349.8209201  | 766.3893323 | -1.132156279 | 0.107094   | -10.57162 | 4.035E-26 | 2.912E-24 |
| ENSMUSG0000063767.4   | ENSMUSG0000063767.4   | ENSMUSG0000063767.4   | protein coding       | S100a7a       | 1508.333044  | 281.0833411 | 2.530123115  | 0.1074157  | 23.554497 | 1.13E-12  | 3.5E-119  |
| ENSMUSG0000034855.13  | ENSMUSG0000034855.13  | ENSMUSG0000034855.13  | protein coding       | Cxcl10        | 47.86340202  | 110.5128515 | -1.203504191 | 0.2553368  | -4.713366 | 2.437E-06 | 2.892E-05 |
| ENSMUSG0000062345.10  | ENSMUSG0000062345.10  | ENSMUSG0000062345.10  | protein coding       | Serpinc2      | 593.0598702  | 1526.833327 | -1.365305597 | 0.143359   | -9.52368  | 1.672E-21 | 1.938E-20 |
| ENSMUSG0000039601.15  | ENSMUSG0000039601.15  | ENSMUSG0000039601.15  | protein coding       | Rcan2         | 3.750700669  | 50.94154863 | -3.77408276  | 0.5584281  | -6.758412 | 1.395E-11 | 3.556E-10 |
| ENSMUSG0000051596.13  | ENSMUSG0000051596.13  | ENSMUSG0000051596.13  | protein coding       | Enpp2         | 14.40828839  | 0           | 6.205750322  | 1.4042806  | 4.192297  | 9.905E-06 | 0.001042  |
| ENSMUSG0000025921.7   | ENSMUSG0000025921.7   | ENSMUSG0000025921.7   | protein coding       | Rhd10         | 1914.760142  | 5779.959738 | -1.59332635  | 0.8817448  | -19.49148 | 1.297E-84 | 6.144E-82 |
| ENSMUSG0000034159.12  | ENSMUSG0000034159.12  | ENSMUSG0000034159.12  | protein coding</     |               |              |             |              |            |           |           |           |

|                       |                       |                       |                                  |            |              |             |              |             |            |           |           |
|-----------------------|-----------------------|-----------------------|----------------------------------|------------|--------------|-------------|--------------|-------------|------------|-----------|-----------|
| ENSMUSG00000110633.1  | ENSMUSG00000110633.1  | ENSMUSG00000110633.1  | lincRNA                          | Gm32122    | 40.9495124   | 19.22502808 | 1.093749449  | 0.4123016   | 2.6527899  | 0.007983  | 0.0366664 |
| ENSMUSG00000052396.7  | ENSMUSG00000052396.7  | ENSMUSG00000052396.7  | protein coding                   | Mogat2     | 16.96597903  | 46.86618632 | -1.461123427 | 0.3808746   | -3.836232  | 0.0001249 | 0.0010143 |
| ENSMUSG00000108801.1  | ENSMUSG00000108801.1  | ENSMUSG00000108801.1  | lincRNA                          | Gm39090    | 7            | 0.730698963 | -5.263365139 | 1.6064708   | -3.336801  | 0.000842  | 0.0005405 |
| ENSMUSG00000030484.5  | ENSMUSG00000030484.5  | ENSMUSG00000030484.5  | protein coding                   | Lypd5      | 60.85262808  | 26.33878052 | -1.11376359  | 0.3162088   | 8.3039680  | 0.001277  | 0.0010337 |
| ENSMUSG00000035283.4  | ENSMUSG00000035283.4  | ENSMUSG00000035283.4  | protein coding                   | Adrb1      | 1.888914059  | 23.8231955  | -3.675485273 | 0.8512327   | -4.31784   | 1.576E-05 | 0.000159  |
| ENSMUSG00000096764.1  | ENSMUSG00000096764.1  | ENSMUSG00000096764.1  | protein coding                   | Gm21985    | 0            | 73.85640365 | -8.753313862 | 1.250654    | -6.998898  | 2.578E-12 | 7.142E-11 |
| ENSMUSG00000086806.1  | ENSMUSG00000086806.1  | ENSMUSG00000086806.1  | antisense RNA                    | Gm13054    | 0            | 6.010030292 | -5.134738532 | 1.6893669   | -3.039445  | 0.0023701 | 0.0133024 |
| ENSMUSG00000097373.1  | ENSMUSG00000097373.1  | ENSMUSG00000097373.1  | antisense RNA                    | Gm26877    | 32.64875906  | 7.394516849 | 2.141657027  | 0.8133039   | 2.63328    | 0.0084655 | 0.0384305 |
| ENSMUSG00000024164.15 | ENSMUSG00000024164.15 | ENSMUSG00000024164.15 | protein coding                   | Cc3        | 511.969101   | 212.561179  | 1.268334203  | 0.1324052   | 9.5791854  | 9.781E-22 | 5.432E-20 |
| ENSMUSG00000113959.1  | ENSMUSG00000113959.1  | ENSMUSG00000113959.1  | TEC                              | AC124739.5 | 16.63370815  | 0.64829908  | 4.577335641  | 0.1240995   | 3.7366172  | 0.0001865 | 0.0001445 |
| ENSMUSG0000001510.8   | ENSMUSG0000001510.8   | ENSMUSG0000001510.8   | protein coding                   | Dir3       | 43.22706294  | 21.55526984 | 1.004423998  | 0.3758998   | 2.671223   | 0.0075373 | 0.0350186 |
| ENSMUSG00000039384.8  | ENSMUSG00000039384.8  | ENSMUSG00000039384.8  | protein coding                   | Dusp10     | 369.6770001  | 773.7514338 | -1.067051954 | 0.157702    | -6.763265  | 1.322E-11 | 3.382E-10 |
| ENSMUSG00000050737.13 | ENSMUSG00000050737.13 | ENSMUSG00000050737.13 | protein coding                   | Ptges      | 847.9070936  | 345.8457334 | 1.29349233   | 0.159771    | 9.059788   | 6.685E-16 | 2.198E-14 |
| ENSMUSG00000086196.4  | ENSMUSG00000086196.4  | ENSMUSG00000086196.4  | protein coding                   | Col8a1     | 12315.49213  | 5195.207192 | 1.245091433  | 0.0678316   | 18.355639  | 2.976E-75 | 1.1E-72   |
| ENSMUSG0000007786.16  | ENSMUSG0000007786.16  | ENSMUSG0000007786.16  | protein coding                   | Nkxar2     | 55.24000621  | 215.6115687 | -1.961155522 | 0.4493908   | -3.36848   | 1.251E-05 | 0.0001289 |
| ENSMUSG00000078503.9  | ENSMUSG00000078503.9  | ENSMUSG00000078503.9  | protein coding                   | Zfp990     | 50.92938757  | 0           | 8.023464793  | 1.2520534   | 6.4082448  | 1.472E-10 | 3.265E-09 |
| ENSMUSG00000044216.6  | ENSMUSG00000044216.6  | ENSMUSG00000044216.6  | protein coding                   | Kcnj4      | 9.016189163  | 26.93745165 | -1.584937362 | 0.5541798   | -2.860035  | 0.0042359 | 0.0216999 |
| ENSMUSG00000035395.11 | ENSMUSG00000035395.11 | ENSMUSG00000035395.11 | protein coding                   | Pet2       | 0            | 5.767088114 | -5.072007884 | 1.8369484   | -2.76105   | 0.0057616 | 0.0281349 |
| ENSMUSG00000022514.14 | ENSMUSG00000022514.14 | ENSMUSG00000022514.14 | protein coding                   | Il1rap     | 349.6397998  | 117.1749457 | -1.580325241 | 0.1573804   | 1.0041361  | 1.003E-23 | 6.434E-22 |
| ENSMUSG00000079051.5  | ENSMUSG00000079051.5  | ENSMUSG00000079051.5  | protein coding                   | Gm14025    | 35.09651173  | 4.637787679 | 2.929911479  | 0.5795234   | 5.056478   | 4.289E-07 | 5.884E-06 |
| ENSMUSG00000085289.1  | ENSMUSG00000085289.1  | ENSMUSG00000085289.1  | antisense RNA                    | Gm15337    | 32.40656758  | 3.518494931 | 3.196420166  | 0.6280204   | 5.0896758  | 3.587E-07 | 4.976E-06 |
| ENSMUSG00000073413.9  | ENSMUSG00000073413.9  | ENSMUSG00000073413.9  | protein coding                   | Ly6g6d     | 7.699535704  | 0           | 5.500936544  | 1.5658947   | 3.3850995  | 0.0007116 | 0.004641  |
| ENSMUSG0000010782.1   | ENSMUSG0000010782.1   | ENSMUSG0000010782.1   | lincRNA                          | Gm28231    | 9.68056203   | 0           | 6.528078351  | 1.5090198   | 3.7296251  | 0.0001918 | 0.0014814 |
| ENSMUSG00000049929.7  | ENSMUSG00000049929.7  | ENSMUSG00000049929.7  | protein coding                   | Lpar4      | 10.07522829  | 0           | 6.590415164  | 1.5018356   | 3.7899734  | 0.0001513 | 0.0012027 |
| ENSMUSG00000043430.5  | ENSMUSG00000043430.5  | ENSMUSG00000043430.5  | protein coding                   | Psap1      | 402.1629137  | 69.49534609 | 2.532577602  | 0.2141468   | 11.826359  | 2.852E-32 | 2.703E-30 |
| ENSMUSG00000024087.3  | ENSMUSG00000024087.3  | ENSMUSG00000024087.3  | protein coding                   | Cyp1b1     | 796.4437305  | 143.0144798 | 2.480315609  | 0.1778113   | 13.949148  | 3.184E-44 | 5.072E-42 |
| ENSMUSG00000047414.6  | ENSMUSG00000047414.6  | ENSMUSG00000047414.6  | protein coding                   | Fir2       | 582.897306   | 189.2116794 | 1.62284861   | 0.4114807   | 3.9439241  | 8.016E-05 | 0.0068845 |
| ENSMUSG00000031734.13 | ENSMUSG00000031734.13 | ENSMUSG00000031734.13 | protein coding                   | lrx3       | 560.8003243  | 261.0110235 | 1.102519344  | 0.2507104   | 4.3975817  | 1.095E-05 | 0.0001145 |
| ENSMUSG00000048764.16 | ENSMUSG00000048764.16 | ENSMUSG00000048764.16 | protein coding                   | Tmprss11f  | 54.08444726  | 6.939093778 | 2.945136     | 0.4775974   | 6.1665569  | 6.979E-10 | 1.434E-08 |
| ENSMUSG00000029007.8  | ENSMUSG00000029007.8  | ENSMUSG00000029007.8  | protein coding                   | Agtrap     | 177.1323628  | 364.7681559 | -1.041292947 | 0.1517694   | -8.861019  | 6.837E-12 | 1.795E-10 |
| ENSMUSG00000073591.4  | ENSMUSG00000073591.4  | ENSMUSG00000073591.4  | protein coding                   | Pcdbh22    | 22.22506798  | 5.648058526 | -1.594964667 | 0.5755595   | -3.4331194 | 0.0005967 | 0.0039789 |
| ENSMUSG00000020316.6  | ENSMUSG00000020316.6  | ENSMUSG00000020316.6  | protein coding                   | Dkk2       | 10.21595963  | 38.93705864 | -1.130275427 | 0.4258627   | -4.532624  | 5.826E-06 | 6.457E-05 |
| ENSMUSG0000002006.12  | ENSMUSG0000002006.12  | ENSMUSG0000002006.12  | protein coding                   | Pzd4       | 82.35448247  | 180.5910287 | -1.934133088 | 0.1797666   | -6.308922  | 2.81E-10  | 6.051E-09 |
| ENSMUSG00000006989.12 | ENSMUSG00000006989.12 | ENSMUSG00000006989.12 | protein coding                   | Gaint13    | 8.730573625  | 0.746195165 | 3.602848511  | 1.3747054   | 2.620815   | 0.008772  | 0.0399344 |
| ENSMUSG00000009817.18 | ENSMUSG00000009817.18 | ENSMUSG00000009817.18 | protein coding                   | Pleg1      | 893.3203394  | 173.4704264 | -1.010141082 | 0.2368989   | -4.214367  | 2.605E-05 | 0.002426  |
| ENSMUSG00000017688.14 | ENSMUSG00000017688.14 | ENSMUSG00000017688.14 | protein coding                   | Hnf1g      | 1.619397345  | 13.41659348 | -3.092067217 | 0.9570722   | -3.17116   | 0.0115185 | 0.0092882 |
| ENSMUSG00000029086.15 | ENSMUSG00000029086.15 | ENSMUSG00000029086.15 | protein coding                   | Prom1      | 1.014768427  | 456.9576665 | -2.10776601  | 0.2070257   | -10.48899  | 9.035E-27 | 7.073E-24 |
| ENSMUSG00000048078.16 | ENSMUSG00000048078.16 | ENSMUSG00000048078.16 | protein coding                   | Tenm4      | 193.0829625  | 53.24088789 | 1.865937037  | 0.223077    | 8.3645407  | 6.035E-17 | 2.523E-15 |
| ENSMUSG00000020607.7  | ENSMUSG00000020607.7  | ENSMUSG00000020607.7  | protein coding                   | Fam84a     | 536.2150834  | 248.1484003 | 1.112846752  | 0.1240385   | 8.9717884  | 2.917E-19 | 1.419E-17 |
| ENSMUSG00000019990.15 | ENSMUSG00000019990.15 | ENSMUSG00000019990.15 | protein coding                   | Hnf1b      | 9.62221032   | 0.746195165 | 7.343840861  | 1.3692357   | 2.7339928  | 0.0026571 | 0.0030936 |
| ENSMUSG00000041801.5  | ENSMUSG00000041801.5  | ENSMUSG00000041801.5  | protein coding                   | Mtdra3     | 53.95237077  | 110.380898  | -1.026797883 | 0.254856    | -4.028933  | 5.603E-05 | 0.0004951 |
| ENSMUSG00000032584.12 | ENSMUSG00000032584.12 | ENSMUSG00000032584.12 | protein coding                   | Plist1     | 1.164718845  | 34.13865427 | -4.803368412 | 0.9188128   | -5.227819  | 1.715E-07 | 2.484E-06 |
| ENSMUSG00000024388.10 | ENSMUSG00000024388.10 | ENSMUSG00000024388.10 | protein coding                   | Myo7b      | 5.368435776  | 78.97868815 | -3.851368463 | 0.5908496   | -6.518356  | 7.108E-11 | 1.646E-09 |
| ENSMUSG00000062309.8  | ENSMUSG00000062309.8  | ENSMUSG00000062309.8  | protein coding                   | Rpp25      | 34.62203026  | 104.9016659 | -1.603767459 | 0.3097997   | -5.176788  | 2.257E-07 | 3.211E-06 |
| ENSMUSG00000085022.2  | ENSMUSG00000085022.2  | ENSMUSG00000085022.2  | lincRNA                          | Gm5860     | 8.072732583  | 76.01419228 | -3.29872477  | 0.395628    | -8.146623  | 3.742E-16 | 1.471E-14 |
| ENSMUSG00000063851.12 | ENSMUSG00000063851.12 | ENSMUSG00000063851.12 | protein coding                   | Rnf183     | 102.1350667  | 38.13258765 | 1.425526286  | 0.2695862   | 5.3999638  | 8.324E-08 | 1.274E-06 |
| ENSMUSG00000014773.13 | ENSMUSG00000014773.13 | ENSMUSG00000014773.13 | protein coding                   | Dil1       | 102.9854227  | 245.9685288 | -1.256425193 | 0.1699867   | -7.391317  | 1.454E-13 | 4.46E-12  |
| ENSMUSG0000002578.17  | ENSMUSG0000002578.17  | ENSMUSG0000002578.17  | protein coding                   | Ikzf4      | 24.29855268  | 116.0253605 | -2.251677445 | 0.2802065   | -8.035778  | 2.999E-16 | 3.565E-14 |
| ENSMUSG00000035868.8  | ENSMUSG00000035868.8  | ENSMUSG00000035868.8  | protein coding                   | Zfp983     | 67.37373615  | 15.14988734 | 2.15044519   | 0.3533815   | 6.0853349  | 1.162E-09 | 2.32E-08  |
| ENSMUSG00000022340.14 | ENSMUSG00000022340.14 | ENSMUSG00000022340.14 | protein coding                   | Sybu       | 19.9870134   | 45.60471579 | -1.189038116 | 0.4083525   | -2.91194   | 0.0035936 | 0.0012310 |
| ENSMUSG00000041180.13 | ENSMUSG00000041180.13 | ENSMUSG00000041180.13 | protein coding                   | Hectd2     | 25.20571189  | 64.78798797 | -1.355640807 | 0.414003    | -3.274471  | 0.001586  | 0.0066062 |
| ENSMUSG00000021216.7  | ENSMUSG00000021216.7  | ENSMUSG00000021216.7  | protein coding                   | Tubaal3    | 0            | 16.32257291 | -6.57332365  | 1.3894001   | -4.732526  | 2.217E-06 | 2.657E-05 |
| ENSMUSG00000043969.4  | ENSMUSG00000043969.4  | ENSMUSG00000043969.4  | protein coding                   | Emc2       | 50.76642433  | 24.81233284 | 1.024103906  | 0.3624372   | 2.8260309  | 0.004192  | 0.0237993 |
| ENSMUSG00000045991.18 | ENSMUSG00000045991.18 | ENSMUSG00000045991.18 | protein coding                   | Oneuc2     | 270.3234577  | 122.8443066 | 1.135348326  | 0.135348326 | 1.7263442  | 3.774E-13 | 1.119E-11 |
| ENSMUSG00000038508.7  | ENSMUSG00000038508.7  | ENSMUSG00000038508.7  | protein coding                   | Gdf15      | 45.71839278  | 5.653621433 | 3.01560393   | 0.5200918   | 5.7982151  | 6.702E-09 | 1.215E-07 |
| ENSMUSG00000025889.13 | ENSMUSG00000025889.13 | ENSMUSG00000025889.13 | protein coding                   | Snra       | 19.5934224   | 53.81995414 | -1.463250581 | 0.3491387   | -4.191029  | 2.777E-05 | 0.002662  |
| ENSMUSG0000001457.7   | ENSMUSG0000001457.7   | ENSMUSG0000001457.7   | protein coding                   | Spr        | 78.53338396  | 29.23498828 | 1.422435668  | 0.312157    | 4.5567956  | 5.194E-06 | 5.806E-05 |
| ENSMUSG00000027955.16 | ENSMUSG00000027955.16 | ENSMUSG00000027955.16 | protein coding                   | Fam198b    | 202.7253014  | 677.020761  | 1.581132509  | 0.103726    | 14.456389  | 2.895E-47 | 4.264E-45 |
| ENSMUSG00000067377.12 | ENSMUSG00000067377.12 | ENSMUSG00000067377.12 | protein coding                   | Tspan6     | 76.44720884  | 11.76307004 | 7.705694061  | 0.385581    | 1.023018   | 0.217E-12 | 6.651E-11 |
| ENSMUSG00000047907.11 | ENSMUSG00000047907.11 | ENSMUSG00000047907.11 | protein coding                   | Fgf7       | 97.0094067   | 13.06567572 | 2.882077146  | 0.8901432   | 3.2377679  | 0.012004  | 0.007386  |
| ENSMUSG00000081375.1  | ENSMUSG00000081375.1  | ENSMUSG00000081375.1  | transcribed processed pseudogene | Gm14886    | 12.35733969  | 2.453713134 | 6.22331886   | 0.9437485   | 2.523374   | 0.0116247 | 0.0499769 |
| ENSMUSG00000027296.7  | ENSMUSG00000027296.7  | ENSMUSG00000027296.7  | protein coding                   | ltkpa      | 5.194499548  | 0           | 4.734410316  | 1.7943202   | 2.6385537  | 0.003261  | 0.033459  |
| ENSMUSG00000032086.12 | ENSMUSG00000032086.12 | ENSMUSG00000032086.12 | protein coding                   | Bace1      | 2672.102151  | 1248.053996 | 1.098632297  | 0.0760067   | 14.454411  | 2.351E-47 | 4.345E-45 |
| ENSMUSG00000039145.16 | ENSMUSG00000039145.16 | ENSMUSG00000039145.16 | protein coding                   | Camk1d     | 10.22719994  | 905.2864321 | -2.913420954 | 0.1239966   | -23.49547  | 4.54E-122 | 4.93E-119 |
| ENSMUSG00000000296.8  | ENSMUSG00000000296.8  | ENSMUSG00000000296.8  | protein coding                   | Tpds12     | 1575.5273909 | 726.4978689 | 1.115701601  | 0.1053004   | 10.595972  | 3.111E-26 | 2.263E-24 |
| ENSMUSG00000067199.4  | ENSMUSG00000067199.4  | ENSMUSG00000067199.4  | protein coding                   | Frata      |              |             |              |             |            |           |           |





|                      |                      |                      |                                |               |             |             |              |           |            |           |           |
|----------------------|----------------------|----------------------|--------------------------------|---------------|-------------|-------------|--------------|-----------|------------|-----------|-----------|
| ENSMUSG0000057933.10 | ENSMUSG0000057933.10 | ENSMUSG0000057933.10 | protein coding                 | Gsta2         | 0           | 6.296357605 | -5.204186073 | 1.6604919 | -3.134123  | 0.0017237 | 0.0100284 |
| ENSMUSG0000035615.12 | ENSMUSG0000035615.12 | ENSMUSG0000035615.12 | protein coding                 | Fmpd1         | 7.419919718 | 19.72203825 | -1.411338042 | 0.5441038 | -2.593876  | 0.0094901 | 0.0420239 |
| ENSMUSG0000022816.11 | ENSMUSG0000022816.11 | ENSMUSG0000022816.11 | protein coding                 | Fst11         | 23.88155768 | 3.908281237 | 2.601529176  | 0.8098189 | 3.2124827  | 0.0013159 | 0.0019724 |
| ENSMUSG0000032766.9  | ENSMUSG0000032766.9  | ENSMUSG0000032766.9  | protein coding                 | Gng11         | 6.150591802 | 0           | 4.976736634  | 1.7027901 | 2.9226953  | 0.0034702 | 0.0182139 |
| ENSMUSG0000097479.1  | ENSMUSG0000097479.1  | ENSMUSG0000097479.1  | lincRNA                        | Gm26582       | 22.4600913  | 45.49484518 | -1.020801234 | 0.4035016 | -2.529856  | 0.0114109 | 0.0492747 |
| ENSMUSG0000070704.10 | ENSMUSG0000070704.10 | ENSMUSG0000070704.10 | protein coding                 | Ugt2b36       | 1.013910473 | 99.84672029 | -6.735899769 | 0.9051582 | -7.441678  | 9.941E-14 | 3.124E-12 |
| ENSMUSG0000025912.16 | ENSMUSG0000025912.16 | ENSMUSG0000025912.16 | protein coding                 | Mybl1         | 242.3093289 | 502.9024123 | -1.054824726 | 0.1533676 | -8.877753  | 6.08E-12  | 1.81E-10  |
| ENSMUSG0000040212.12 | ENSMUSG0000040212.12 | ENSMUSG0000040212.12 | protein coding                 | Emp3          | 153.9417814 | 58.83528418 | 1.386990455  | 0.2336225 | 5.9368885  | 2.905E-09 | 5.522E-08 |
| ENSMUSG0000020053.18 | ENSMUSG0000020053.18 | ENSMUSG0000020053.18 | protein coding                 | Igf1          | 21.504535   | 4.210179146 | 2.343901351  | 0.6609898 | 3.5460477  | 0.0003911 | 0.0027643 |
| ENSMUSG0000086531.2  | ENSMUSG0000086531.2  | ENSMUSG0000086531.2  | lincRNA                        | Gm11351       | 0           | 2.05256687  | -10.2287864  | 1.1954376 | -8.556504  | 1.163E-17 | 1.515E-16 |
| ENSMUSG0000096856.7  | ENSMUSG0000096856.7  | ENSMUSG0000096856.7  | protein coding                 | Gm10778       | 0           | 6.707351273 | -5.304295222 | 1.8406471 | -3.233052  | 0.0012248 | 0.0074789 |
| ENSMUSG0000026932.14 | ENSMUSG0000026932.14 | ENSMUSG0000026932.14 | processed pseudogene           | Nac22         | 1101.140129 | 534.1575411 | 1.044500254  | 1.1796154 | 5.8125031  | 6.056E-09 | 1.107E-07 |
| ENSMUSG0000113011.1  | ENSMUSG0000113011.1  | ENSMUSG0000113011.1  | processed pseudogene           | AC211878.2    | 34.92150482 | 0.64829808  | 5.637144179  | 1.1240742 | 5.0149195  | 1.638E-07 | 7.214E-06 |
| ENSMUSG0000001763.18 | ENSMUSG0000001763.18 | ENSMUSG0000001763.18 | protein coding                 | Tspan33       | 64.26927242 | 39.7451257  | -2.165943098 | 0.5236856 | -4.995255  | 8.878E-07 | 7.826E-06 |
| ENSMUSG0000022899.8  | ENSMUSG0000022899.8  | ENSMUSG0000022899.8  | protein coding                 | Slc15a2       | 30.41158    | 0           | 7.281071409  | 1.2983522 | 6.607891   | 2.048E-08 | 3.469E-07 |
| ENSMUSG0000020427.11 | ENSMUSG0000020427.11 | ENSMUSG0000020427.11 | protein coding                 | Igf2bp3       | 3620.125987 | 11134.47349 | -1.6211174   | 0.0794295 | -20.40951  | 1.377E-92 | 7.949E-90 |
| ENSMUSG0000042190.12 | ENSMUSG0000042190.12 | ENSMUSG0000042190.12 | protein coding                 | Cmk1r1        | 4.962209961 | 0           | 4.665444187  | 1.7470104 | 2.6705303  | 0.0075732 | 0.0351954 |
| ENSMUSG0000055538.7  | ENSMUSG0000055538.7  | ENSMUSG0000055538.7  | protein coding                 | Zcchc24       | 54.46701008 | 5.263835127 | 3.365083509  | 0.523196  | 6.4317832  | 1.261E-10 | 2.835E-09 |
| ENSMUSG0000050241.8  | ENSMUSG0000050241.8  | ENSMUSG0000050241.8  | protein coding                 | Klre1         | 3.751236216 | 14.94853226 | -2.007548671 | 0.2532396 | -2.661382  | 0.0077821 | 0.0359223 |
| ENSMUSG0000060403.13 | ENSMUSG0000060403.13 | ENSMUSG0000060403.13 | processed transcript           | Trrf1         | 20.00192735 | 156.0505707 | -4.47409549  | 0.2583133 | -9.579102  | 9.789E-22 | 5.432E-20 |
| ENSMUSG000002103.9   | ENSMUSG000002103.9   | ENSMUSG000002103.9   | protein coding                 | Gfra2         | 8.28357365  | 0           | 5.20036655   | 1.6344495 | 3.2859583  | 0.0101664 | 0.0063619 |
| ENSMUSG0000112758.1  | ENSMUSG0000112758.1  | ENSMUSG0000112758.1  | bidirectional promoter lincRNA | AC159502.1    | 4.926983239 | 0           | 4.656709478  | 1.7647579 | 2.6387242  | 0.003219  | 0.0379401 |
| ENSMUSG0000050822.11 | ENSMUSG0000050822.11 | ENSMUSG0000050822.11 | protein coding                 | Sic29a4       | 66.98287849 | 160.8745533 | -1.267880095 | 2.7376315 | -5.335488  | 8.529E-08 | 1.446E-06 |
| ENSMUSG0000049939.6  | ENSMUSG0000049939.6  | ENSMUSG0000049939.6  | protein coding                 | Lrrc4         | 16.70362605 | 3.880466698 | 2.104082157  | 0.6983319 | 3.0130115  | 0.0025867 | 0.0134305 |
| ENSMUSG0000047045.17 | ENSMUSG0000047045.17 | ENSMUSG0000047045.17 | protein coding                 | Tmem164       | 269.0542296 | 861.2247074 | -1.678156027 | 0.598137  | -2.805638  | 0.0050217 | 0.0251603 |
| ENSMUSG0000024238.14 | ENSMUSG0000024238.14 | ENSMUSG0000024238.14 | protein coding                 | Zeb3          | 227.9284524 | 60.0509439  | 1.927338977  | 1.213672  | 9.0200835  | 1.879E-19 | 9.311E-18 |
| ENSMUSG0000090958.2  | ENSMUSG0000090958.2  | ENSMUSG0000090958.2  | protein coding                 | Lrrc1         | 43.03005527 | 8.619915336 | 2.300650721  | 0.5255642 | 4.3774877  | 1.201E-05 | 0.000124  |
| ENSMUSG0000103749.1  | ENSMUSG0000103749.1  | ENSMUSG0000103749.1  | protein coding                 | Pcdhgb5       | 94.06835263 | 11.68953036 | 3.007632218  | 0.5911331 | 5.0879107  | 3.62E-07  | 5.015E-06 |
| ENSMUSG0000026764.15 | ENSMUSG0000026764.15 | ENSMUSG0000026764.15 | protein coding                 | Klf5c         | 83.07881988 | 184.7253946 | -1.152979136 | 0.1950909 | -6.052166  | 1.429E-09 | 2.815E-08 |
| ENSMUSG0000023913.17 | ENSMUSG0000023913.17 | ENSMUSG0000023913.17 | protein coding                 | Plag2g7       | 26.5845244  | 153.1487954 | -2.523903758 | 0.3141382 | -8.063023  | 7.443E-16 | 2.847E-14 |
| ENSMUSG0000033788.15 | ENSMUSG0000033788.15 | ENSMUSG0000033788.15 | protein coding                 | Dyf8          | 242.8872928 | 25.53183159 | 3.241217257  | 0.2622856 | 12.386529  | 3.481E-35 | 4.679E-33 |
| ENSMUSG0000054545.17 | ENSMUSG0000054545.17 | ENSMUSG0000054545.17 | protein coding                 | Ugt18a1       | 25.54035757 | 3.946103464 | 2.706701693  | 0.865497  | 3.1273379  | 0.001764  | 0.010262  |
| ENSMUSG000003032.15  | ENSMUSG000003032.15  | ENSMUSG000003032.15  | protein coding                 | Alap111       | 10.03953736 | 9.446199734 | 2.866520584  | 0.722679  | 3.9941949  | 6.849E-05 | 0.0005645 |
| ENSMUSG0000027843.13 | ENSMUSG0000027843.13 | ENSMUSG0000027843.13 | protein coding                 | Ptpr23        | 1907.574775 | 828.2942898 | 1.202606976  | 0.0810437 | 14.8389953 | 3.189E-50 | 1.683E-47 |
| ENSMUSG0000022901.3  | ENSMUSG0000022901.3  | ENSMUSG0000022901.3  | protein coding                 | Ctse          | 84.38005004 | 23.55732178 | 1.829871049  | 0.3564984 | 5.1330096  | 2.85E-07  | 4.014E-06 |
| ENSMUSG0000043639.14 | ENSMUSG0000043639.14 | ENSMUSG0000043639.14 | protein coding                 | Rbm20         | 2.807779186 | 22.71126369 | -3.022318337 | 0.8005369 | -3.775364  | 0.0001599 | 0.0012595 |
| ENSMUSG0000043773.5  | ENSMUSG0000043773.5  | ENSMUSG0000043773.5  | lincRNA                        | 1700048020Rik | 13.3965757  | 1.29659816  | 3.294133159  | 1.1590136 | 2.8421667  | 0.0044805 | 0.027448  |
| ENSMUSG0000085992.1  | ENSMUSG0000085992.1  | ENSMUSG0000085992.1  | lincRNA                        | Gm11515       | 5.742168202 | 0           | 4.880858782  | 1.7536191 | 7.7833216  | 0.0038805 | 0.0266175 |
| ENSMUSG0000078713.8  | ENSMUSG0000078713.8  | ENSMUSG0000078713.8  | protein coding                 | Tomms5        | 154.9406533 | 349.3889255 | -1.117298347 | 0.2245836 | -5.218984  | 1.799E-07 | 2.539E-06 |
| ENSMUSG0000020681.14 | ENSMUSG0000020681.14 | ENSMUSG0000020681.14 | protein coding                 | Ace           | 39.88478587 | 14.00834296 | 1.503382132  | 0.4309195 | 3.4887776  | 0.004852  | 0.0308311 |
| ENSMUSG000006777.7   | ENSMUSG000006777.7   | ENSMUSG000006777.7   | protein coding                 | Kr23          | 0           | 96.12798367 | -9.15718697  | 1.2203314 | 7.486339   | 7.082E-14 | 2.268E-12 |
| ENSMUSG0000027849.18 | ENSMUSG0000027849.18 | ENSMUSG0000027849.18 | protein coding                 | Syt6          | 11.40344593 | 1.481264514 | 2.989788995  | 0.1030316 | 2.8941891  | 0.0038014 | 0.0197365 |
| ENSMUSG0000033510.14 | ENSMUSG0000033510.14 | ENSMUSG0000033510.14 | protein coding                 | Outd7a        | 5.894103265 | 0           | 4.913673787  | 1.6682993 | 2.9453191  | 0.003262  | 0.0172096 |
| ENSMUSG0000022641.15 | ENSMUSG0000022641.15 | ENSMUSG0000022641.15 | protein coding                 | Bbx           | 1542.685099 | 576.9393394 | 1.420003973  | 0.1123223 | 12.642223  | 1.235E-36 | 1.435E-34 |
| ENSMUSG0000025884.17 | ENSMUSG0000025884.17 | ENSMUSG0000025884.17 | protein coding                 | Pde8a         | 46.88412712 | 21.71211866 | 1.117267711  | 0.3907115 | 2.8959723  | 0.0042421 | 0.021692  |
| ENSMUSG0000037025.11 | ENSMUSG0000037025.11 | ENSMUSG0000037025.11 | protein coding                 | Foxa2         | 217.7282765 | 78.74310691 | 1.465493696  | 0.1944496 | 7.534825   | 4.888E-14 | 1.593E-12 |
| ENSMUSG0000043222.7  | ENSMUSG0000043222.7  | ENSMUSG0000043222.7  | protein coding                 | Dsc1          | 0           | 8.474869242 | -5.63078074  | 1.5393418 | -3.657915  | 0.002543  | 0.001899  |
| ENSMUSG0000034612.7  | ENSMUSG0000034612.7  | ENSMUSG0000034612.7  | protein coding                 | Chst11        | 99.80723561 | 19.15050175 | 2.383027459  | 0.3382273 | 7.0456244  | 1.846E-12 | 5.185E-11 |
| ENSMUSG0000047712.8  | ENSMUSG0000047712.8  | ENSMUSG0000047712.8  | protein coding                 | Ust           | 56.48718292 | 11.7292849  | 2.268485058  | 0.4518603 | 5.0203255  | 5.158E-07 | 7.024E-06 |
| ENSMUSG0000050578.10 | ENSMUSG0000050578.10 | ENSMUSG0000050578.10 | protein coding                 | Mmp13         | 315.9249124 | 116.6046962 | 1.43801394   | 0.2172212 | 6.2004338  | 3.591E-11 | 8.651E-10 |
| ENSMUSG0000108926.1  | ENSMUSG0000108926.1  | ENSMUSG0000108926.1  | processed pseudogene           | Gm10988       | 0           | 5.059833304 | -4.882314394 | 1.8538514 | -2.633066  | 0.0048483 | 0.0304831 |
| ENSMUSG0000033377.14 | ENSMUSG0000033377.14 | ENSMUSG0000033377.14 | protein coding                 | Palmd         | 81.06090042 | 34.55710383 | 1.224330231  | 0.3154926 | 3.8806935  | 0.001042  | 0.0038317 |
| ENSMUSG0000075391.6  | ENSMUSG0000075391.6  | ENSMUSG0000075391.6  | processed pseudogene           | Gm13443       | 107.3641446 | 0.735069349 | 7.244780335  | 1.0605749 | 6.8309933  | 8.433E-12 | 2.185E-10 |
| ENSMUSG0000044258.10 | ENSMUSG0000044258.10 | ENSMUSG0000044258.10 | protein coding                 | Ctla2a        | 116.7234435 | 1204.657461 | -3.366977719 | 0.2101668 | -16.2026   | 9.191E-58 | 2.326E-55 |
| ENSMUSG0000026470.14 | ENSMUSG0000026470.14 | ENSMUSG0000026470.14 | protein coding                 | Rpl21         | 226.2563179 | 501.9896134 | -1.148756243 | 0.3184673 | -3.607141  | 0.003096  | 0.0022593 |
| ENSMUSG0000096269.3  | ENSMUSG0000096269.3  | ENSMUSG0000096269.3  | processed pseudogene           | Rp31-ps21     | 24.25342447 | 1.481264514 | 4.083313814  | 0.9160779 | 4.576789   | 8.285E-06 | 8.885E-05 |
| ENSMUSG0000014846.12 | ENSMUSG0000014846.12 | ENSMUSG0000014846.12 | protein coding                 | Tpp33         | 31.99623933 | 242.4427458 | -2.917173028 | 0.2611456 | -11.17067  | 5.675E-29 | 4.84E-27  |
| ENSMUSG0000049646.7  | ENSMUSG0000049646.7  | ENSMUSG0000049646.7  | protein coding                 | BC030500      | 12.66121012 | 1.49232033  | 3.12552665   | 1.2039143 | 2.5981372  | 0.004278  | 0.041988  |
| ENSMUSG0000036192.15 | ENSMUSG0000036192.15 | ENSMUSG0000036192.15 | protein coding                 | Rarb          | 9.342596346 | 23.46302178 | -1.53094267  | 5.0948251 | 2.617439   | 0.0085952 | 0.0392821 |
| ENSMUSG0000059656.12 | ENSMUSG0000059656.12 | ENSMUSG0000059656.12 | protein coding                 | Samd12        | 1.115693021 | 190.0432296 | -1.116089991 | 0.2194039 | -6.454258  | 1.088E-12 | 4.575E-09 |
| ENSMUSG0000021998.16 | ENSMUSG0000021998.16 | ENSMUSG0000021998.16 | protein coding                 | Lcp1          | 699.8522596 | 10.64781797 | 6.034440961  | 0.3158958 | 19.13132   | 1.39E-81  | 5.838E-79 |
| ENSMUSG0000058260.2  | ENSMUSG0000058260.2  | ENSMUSG0000058260.2  | protein coding                 | Serpina9      | 11.93847938 | 1.29659816  | 3.335837255  | 1.2192827 | 5.219127   | 0.0101138 | 0.0448655 |
| ENSMUSG0000033871.14 | ENSMUSG0000033871.14 | ENSMUSG0000033871.14 | protein coding                 | Pparg1b       | 219.1831039 | 99.69834281 | 1.133091754  | 0.2022674 | 5.6069335  | 2.06E-08  | 3.486E-07 |
| ENSMUSG0000027199.14 | ENSMUSG0000027199.14 | ENSMUSG0000027199.14 | protein coding                 | Gatm          | 353.4077369 | 3924.652631 | -1.947192599 | 0.0824265 | -42.12469  | 0         | 0         |
| ENSMUSG0000030710.7  | ENSMUSG0000030710.7  | ENSMUSG0000030710.7  | protein coding                 | Apln          | 845.835209  | 218.1453988 | 1.935977436  | 0.1090278 | 17.930994  | 6.756E-72 | 2.27E-69  |
| ENSMUSG0000029816.10 | ENSMUSG0000029816.10 | ENSMUSG0000029816.10 | protein coding                 | Gpmnb         | 5.21816295  | 30.73294612 | -2.551603875 | 0.5753143 | -4.435148  | 9.201E-06 | 9.76E-05  |
| ENSMUSG0000022114.4  | ENSMUSG0000022114.4  | ENSMUSG0000022114.4  |                                |               |             |             |              |           |            |           |           |

|                       |                       |                       |                        |               |              |             |               |           |           |           |           |
|-----------------------|-----------------------|-----------------------|------------------------|---------------|--------------|-------------|---------------|-----------|-----------|-----------|-----------|
| ENSMUSG0000049593.8   | ENSMUSG0000049593.8   | ENSMUSG0000049593.8   | protein coding         | Lce1h         | 68.73001235  | 32.26204055 | 1.089579239   | 0.3171528 | 3.4355028 | 0.0005915 | 0.0039497 |
| ENSMUSG00000102748.1  | ENSMUSG00000102748.1  | ENSMUSG00000102748.1  | protein coding         | Pcdhgb2       | 36.76092609  | 116.7707474 | -1.66506033   | 0.6355662 | -2.619764 | 0.0087991 | 0.0037139 |
| ENSMUSG00000304121.12 | ENSMUSG00000304121.12 | ENSMUSG00000304121.12 | protein coding         | Mks1          | 97.63850778  | 45.24830667 | 1.014256625   | 0.2581103 | 4.2782686 | 1.884e-05 | 0.0001876 |
| ENSMUSG00000606487.7  | ENSMUSG00000606487.7  | ENSMUSG00000606487.7  | protein coding         | Samd5         | 611.357274   | 4511.471977 | -2.884275202  | 0.072203  | -39.94676 | 0         | 0         |
| ENSMUSG0000037636.6   | ENSMUSG0000037636.6   | ENSMUSG0000037636.6   | protein coding         | Sic25a43      | 52.21851846  | 25.26843582 | 1.051920585   | 0.3398651 | 3.095119  | 0.0019674 | 0.0112794 |
| ENSMUSG0000042812.5   | ENSMUSG0000042812.5   | ENSMUSG0000042812.5   | protein coding         | Foxf1         | 233.3509023  | 7.556931573 | 4.970660399   | 0.3664718 | 13.563557 | 6.586e-42 | 9.583e-40 |
| ENSMUSG0000023827.8   | ENSMUSG0000023827.8   | ENSMUSG0000023827.8   | protein coding         | Aggta2        | 181.74460003 | 397.7186269 | -2.277861997  | 0.1713668 | -13.29232 | 2.565e-40 | 3.537e-38 |
| ENSMUSG0000073158.4   | ENSMUSG0000073158.4   | ENSMUSG0000073158.4   | protein coding         | 9030624G23Rik | 12.73718582  | 0           | 6.023049539   | 2.3356856 | 2.5787073 | 0.0099171 | 0.0437973 |
| ENSMUSG0000048231.14  | ENSMUSG0000048231.14  | ENSMUSG0000048231.14  | protein coding         | H2-M10.4      | 0            | 11.25273192 | -6.04074507   | 1.4583338 | -4.142224 | 3.44e-05  | 0.0003197 |
| ENSMUSG0000073821.11  | ENSMUSG0000073821.11  | ENSMUSG0000073821.11  | processed transcript   | 8030451A03Rik | 153.9066659  | 30.1658944  | 2.354250185   | 0.2722873 | 8.6461983 | 5.324e-18 | 2.394e-16 |
| ENSMUSG0000039936.18  | ENSMUSG0000039936.18  | ENSMUSG0000039936.18  | protein coding         | Plk3cd        | 18.79827803  | 77.2618424  | -2.206222616  | 0.3505315 | -6.293936 | 3.095e-10 | 6.619e-09 |
| ENSMUSG0000021678.9   | ENSMUSG0000021678.9   | ENSMUSG0000021678.9   | protein coding         | Ilgag2        | 417.8694999  | 52.6025965  | 2.927939991   | 0.2140883 | 14.00291  | 1.496e-44 | 2.468e-42 |
| ENSMUSG0000021751.13  | ENSMUSG0000021751.13  | ENSMUSG0000021751.13  | protein coding         | Rims3         | 198.2657009  | 93.21063781 | 1.087138878   | 0.1979808 | 5.7836608 | 7.301e-09 | 1.132e-07 |
| ENSMUSG0000032890.17  | ENSMUSG0000032890.17  | ENSMUSG0000032890.17  | protein coding         | Rims3         | 8.095860033  | 45.65742871 | -2.504412545  | 0.4821713 | -5.194031 | 2.058e-07 | 2.943e-06 |
| ENSMUSG0000039395.8   | ENSMUSG0000039395.8   | ENSMUSG0000039395.8   | protein coding         | Mreg          | 3.271857561  | 87.26136129 | -1.874195963  | 0.286741  | -6.536197 | 6.31e-11  | 1.467e-09 |
| ENSMUSG0000035390.16  | ENSMUSG0000035390.16  | ENSMUSG0000035390.16  | protein coding         | Brsk1         | 108.5267232  | 270.7975504 | 1.31928792    | 0.1605562 | -8.208519 | 2.239e-16 | 9.043e-15 |
| ENSMUSG0000075302.10  | ENSMUSG0000075302.10  | ENSMUSG0000075302.10  | protein coding         | Erich2        | 88.20511977  | 32.05512256 | -1.455876272  | 0.2982098 | 4.8820543 | 1.05e-06  | 1.345e-05 |
| ENSMUSG0000004105.8   | ENSMUSG0000004105.8   | ENSMUSG0000004105.8   | protein coding         | Angpt2        | 384.3862421  | 66.8158147  | 2.502738576   | 0.1766994 | 14.265668 | 3.581e-46 | 6.242e-44 |
| ENSMUSG0000091962.2   | ENSMUSG0000091962.2   | ENSMUSG0000091962.2   | protein coding         | Vmn2r78       | 0            | 4.864041134 | -4.83313746   | 1.8035293 | -2.67982  | 0.0073662 | 0.0344666 |
| ENSMUSG0000070509.15  | ENSMUSG0000070509.15  | ENSMUSG0000070509.15  | protein coding         | Rgma          | 34.77509202  | 95.76180881 | -1.469708575  | 0.3657994 | -4.017799 | 5.874e-05 | 0.0005171 |
| ENSMUSG0000031327.10  | ENSMUSG0000031327.10  | ENSMUSG0000031327.10  | protein coding         | Chic1         | 61.11746419  | 14.14962418 | 1.21120041    | 0.3821501 | 5.266347  | 3.264e-08 | 5.371e-07 |
| ENSMUSG0000026483.13  | ENSMUSG0000026483.13  | ENSMUSG0000026483.13  | protein coding         | Fam129a       | 2697.171113  | 364.4683255 | 2.887216439   | 0.0931107 | 31.008427 | 4.15e-211 | 1.24e-207 |
| ENSMUSG0000029019.8   | ENSMUSG0000029019.8   | ENSMUSG0000029019.8   | protein coding         | Nppb          | 27.59516599  | 118.2786679 | -2.098058078  | 0.2695983 | -7.789804 | 6.711e-15 | 2.30e-13  |
| ENSMUSG000001362.1    | ENSMUSG000001362.1    | ENSMUSG000001362.1    | unprocessed pseudogene | Mrgprbp-9s    | 301.7415088  | 196.6275437 | -2.679724103  | 0.2373292 | -11.29117 | 1.451e-29 | 1.224e-27 |
| ENSMUSG000009954.14   | ENSMUSG000009954.14   | ENSMUSG000009954.14   | protein coding         | Kcnq1         | 193.197473   | 44.04404195 | 2.12135249    | 0.2169448 | 9.8238589 | 8.87e-23  | 5.31e-21  |
| ENSMUSG0000043165.7   | ENSMUSG0000043165.7   | ENSMUSG0000043165.7   | protein coding         | L13r          | 23.66886176  | 49.1895274  | -1.050871572  | 0.373505  | -3.11348  | 0.0018489 | 0.0106763 |
| ENSMUSG0000037169.15  | ENSMUSG0000037169.15  | ENSMUSG0000037169.15  | protein coding         | Mycn          | 34.5851423   | 81.81662468 | -1.243306259  | 0.3073891 | -4.044809 | 5.237e-05 | 0.0004661 |
| ENSMUSG0000030074.9   | ENSMUSG0000030074.9   | ENSMUSG0000030074.9   | protein coding         | Gyxl2         | 62.7577356   | 25.80883112 | 1.284992895   | 0.3574754 | 3.5946331 | 0.0003248 | 0.0023549 |
| ENSMUSG0000054453.11  | ENSMUSG0000054453.11  | ENSMUSG0000054453.11  | protein coding         | Sytl5         | 5.39325464   | 98.16324725 | -4.260351165  | 0.5601717 | -7.509039 | 5.956e-14 | 1.921e-12 |
| ENSMUSG0000061601.15  | ENSMUSG0000061601.15  | ENSMUSG0000061601.15  | protein coding         | Pc1o          | 8.65092006   | 11.3128777  | -3.682772915  | 0.3872984 | -9.508878 | 1.927e-21 | 1.047e-19 |
| ENSMUSG0000050425.2   | ENSMUSG0000050425.2   | ENSMUSG0000050425.2   | protein coding         | Mrgprb2       | 20.1618476   | 276.7920101 | -3.767351265  | 0.2612988 | -14.41846 | 3.961e-47 | 7.176e-45 |
| ENSMUSG0000039376.13  | ENSMUSG0000039376.13  | ENSMUSG0000039376.13  | protein coding         | Sympo2l       | 60.78222736  | 28.76288108 | 1.501409836   | 0.331105  | 3.249269  | 0.001789  | 0.0072446 |
| ENSMUSG000007899.6    | ENSMUSG000007899.6    | ENSMUSG000007899.6    | protein coding         | Adgrt2        | 2.527627653  | 14.17187581 | -2.501290203  | 0.9157131 | -2.731522 | 0.0063043 | 0.0032088 |
| ENSMUSG0000022575.4   | ENSMUSG0000022575.4   | ENSMUSG0000022575.4   | protein coding         | Gsdmd         | 137.5578736  | 15.14612224 | 3.199225079   | 0.362154  | 8.833891  | 1.011e-18 | 4.803e-17 |
| ENSMUSG000001348.15   | ENSMUSG000001348.15   | ENSMUSG000001348.15   | protein coding         | Aeg5          | 28.94122644  | 0           | 7.108913031   | 1.310264  | 5.4254419 | 5.778e-08 | 9.076e-07 |
| ENSMUSG0000020467.15  | ENSMUSG0000020467.15  | ENSMUSG0000020467.15  | protein coding         | Efemp1        | 77.110066    | 2652.162166 | -1.7770752    | 0.110856  | -16.0022  | 1.737e-57 | 3.17e-65  |
| ENSMUSG0000068720.6   | ENSMUSG0000068720.6   | ENSMUSG0000068720.6   | protein coding         | Clcn9         | 427.4907057  | 134.3399807 | 1.68748517    | 0.1480634 | 11.26198  | 2.022e-29 | 1.683e-27 |
| ENSMUSG0000020233.13  | ENSMUSG0000020233.13  | ENSMUSG0000020233.13  | protein coding         | Chnr2         | 681.2585658  | 1493.502264 | -1.123396349  | 0.102225  | -11.07749 | 1.813e-28 | 1.279e-26 |
| ENSMUSG0000021364.16  | ENSMUSG0000021364.16  | ENSMUSG0000021364.16  | protein coding         | Elovl2        | 0            | 4.259127188 | -4.63700759   | 1.8358219 | -2.526124 | 0.0115329 | 0.0496748 |
| ENSMUSG0000074457.10  | ENSMUSG0000074457.10  | ENSMUSG0000074457.10  | protein coding         | S100a16       | 975.4825881  | 458.3463561 | 1.08871004    | 0.1574565 | 6.9143558 | 4.71e-12  | 1.26e-10  |
| ENSMUSG0000024059.9   | ENSMUSG0000024059.9   | ENSMUSG0000024059.9   | protein coding         | Clp4          | 293.0200212  | 861.9183073 | -1.556160704  | 0.1100531 | -14.14009 | 2.15e-45  | 3.654e-43 |
| ENSMUSG0000072964.14  | ENSMUSG0000072964.14  | ENSMUSG0000072964.14  | protein coding         | Bhhb9         | 30.33136504  | 11.30167996 | 1.427085767   | 0.4704651 | 6.0334092 | 0.0024181 | 0.0013453 |
| ENSMUSG0000028527.18  | ENSMUSG0000028527.18  | ENSMUSG0000028527.18  | protein coding         | Ak4           | 162.9275087  | 754.1000725 | -2.210512917  | 0.6632326 | -3.332398 | 0.0008593 | 0.0054925 |
| ENSMUSG0000028525.16  | ENSMUSG0000028525.16  | ENSMUSG0000028525.16  | protein coding         | Pde4b         | 13.10373375  | 67.43209917 | -2.350552272  | 0.3817473 | -6.157351 | 7.397e-10 | 1.512e-08 |
| ENSMUSG0000097867.1   | ENSMUSG0000097867.1   | ENSMUSG0000097867.1   | lincRNA                | Lppos         | 111.9059449  | 51.82790689 | 1.112332816   | 0.2415492 | 4.6049952 | 4.125e-06 | 4.696e-05 |
| ENSMUSG0000085068.1   | ENSMUSG0000085068.1   | ENSMUSG0000085068.1   | antisense RNA          | M15895        | 24.4262892   | 5.966645158 | 2.027618197   | 0.56525   | 3.8711176 | 0.0003004 | 0.0024105 |
| ENSMUSG0000050730.17  | ENSMUSG0000050730.17  | ENSMUSG0000050730.17  | protein coding         | Arhgap42      | 1089.853362  | 377.8072358 | 1.528406503   | 0.1143135 | 13.370307 | 9.017e-41 | 1.253e-38 |
| ENSMUSG0000036019.8   | ENSMUSG0000036019.8   | ENSMUSG0000036019.8   | protein coding         | Tmc12         | 47.30138111  | 134.1838087 | -1.498410839  | 0.271937  | -5.509395 | 3.601e-08 | 5.838e-07 |
| ENSMUSG00000109508.1  | ENSMUSG00000109508.1  | ENSMUSG00000109508.1  | lincRNA                | Gk44956       | 55.37361148  | 25.07648052 | 1.13668417    | 0.3754218 | 3.027752  | 0.0024638 | 0.0137666 |
| ENSMUSG0000007888.15  | ENSMUSG0000007888.15  | ENSMUSG0000007888.15  | protein coding         | Crf1          | 179.939153   | 84.42830776 | 1.090891159   | 0.2107123 | 5.1771597 | 2.253e-07 | 3.207e-06 |
| ENSMUSG0000024987.5   | ENSMUSG0000024987.5   | ENSMUSG0000024987.5   | protein coding         | Cyp26a1       | 9.527560045  | 0           | 5.608447707   | 1.534317  | 3.6553383 | 0.002568  | 0.0019173 |
| ENSMUSG0000067212.8   | ENSMUSG0000067212.8   | ENSMUSG0000067212.8   | protein coding         | H2-T23        | 80.81612341  | 34.0339725  | 1.242606005   | 0.3129482 | 3.9706448 | 1.768e-05 | 0.0006166 |
| ENSMUSG0000028402.18  | ENSMUSG0000028402.18  | ENSMUSG0000028402.18  | protein coding         | Mpdz          | 732.1849584  | 1641.331824 | -1.164369053  | 0.077492  | -15.02566 | 4.986e-51 | 1.059e-48 |
| ENSMUSG0000064443.1   | ENSMUSG0000064443.1   | ENSMUSG0000064443.1   | snRNA                  | Gm26226       | 10.75116881  | 2.08617846  | 2.353041948   | 0.9015482 | 6.2100001 | 0.0090542 | 0.0406373 |
| ENSMUSG0000038910.6   | ENSMUSG0000038910.6   | ENSMUSG0000038910.6   | protein coding         | Plic2         | 10.18827364  | 65.12275222 | -2.676607467  | 0.4188362 | -6.390584 | 1.653e-10 | 3.635e-09 |
| ENSMUSG0000060594.6   | ENSMUSG0000060594.6   | ENSMUSG0000060594.6   | protein coding         | Layn          | 38.94132884  | 157.0611799 | -1.0213795994 | 0.313761  | -6.418247 | 1.379e-10 | 3.073e-09 |
| ENSMUSG0000061341.5   | ENSMUSG0000061341.5   | ENSMUSG0000061341.5   | protein coding         | Zfp52         | 332.6202044  | 1236.114373 | -1.892789623  | 0.1046115 | -18.09352 | 3.585e-73 | 1.25e-70  |
| ENSMUSG0000039828.14  | ENSMUSG0000039828.14  | ENSMUSG0000039828.14  | protein coding         | Tex15         | 31.78181328  | 104.3446096 | -1.723198245  | 0.429179  | 4.019599  | 5.642e-05 | 0.0002228 |
| ENSMUSG0000061527.6   | ENSMUSG0000061527.6   | ENSMUSG0000061527.6   | protein coding         | Kfs           | 16.6795293   | 0           | 5.77402267    | 2.149775  | 2.6858632 | 0.0075243 | 0.0339362 |
| ENSMUSG000009097.9    | ENSMUSG000009097.9    | ENSMUSG000009097.9    | protein coding         | Tbx1          | 50.09925881  | 0           | 8.002966341   | 1.257045  | 6.396874  | 1.586e-10 | 3.05e-09  |
| ENSMUSG0000035273.14  | ENSMUSG0000035273.14  | ENSMUSG0000035273.14  | protein coding         | Hpse          | 59.91692748  | 272.5829213 | 1.851819724   | 0.2056713 | -10.66116 | 1.547e-26 | 1.143e-24 |
| ENSMUSG0000024678.6   | ENSMUSG0000024678.6   | ENSMUSG0000024678.6   | protein coding         | Msa44d        | 2.072949153  | 30.13247695 | -3.814361722  | 0.7445417 | -5.1231   | 3.006e-07 | 4.214e-06 |
| ENSMUSG0000085956.1   | ENSMUSG0000085956.1   | ENSMUSG0000085956.1   | processed transcript   | 4930481B07Rik | 5.235460109  | 21.9272463  | 1.334130643   | 0.3402519 | 9.3200818 | 8.818e-05 | 0.000745  |
| ENSMUSG0000074280.6   | ENSMUSG0000074280.6   | ENSMUSG0000074280.6   | processed pseudogene   | Gm166         | 1024.105297  | 2.404765092 | 8.693985379   | 0.5639514 | 15.416038 | 1.277e-53 | 2.917e-51 |
| ENSMUSG0000073197.9   | ENSMUSG0000073197.9   | ENSMUSG0000073197.9   | processed transcript   | 5730507C01Rik | 43.55020049  | 10.59886993 | 1.460546754   | 0.4605466 | 4.431304  | 9.366e-06 | 9.924e-05 |
| ENSMUSG0000014291.1   | ENSMUSG0000014291.1   | ENSMUSG0000014291.1   | antisense RNA          | AC139750.1    | 7.74632615   | 0           | 5.30812458    | 1.5602766 | 3.4020408 | 0.0006688 | 0.0043966 |
| ENSMUSG0000029371.7   | ENSMUSG0000029371.7   | ENSMUSG0000029371.7   | protein coding         |               |              |             |               |           |           |           |           |

|                       |                       |                       |                      |               |              |             |              |           |           |           |            |
|-----------------------|-----------------------|-----------------------|----------------------|---------------|--------------|-------------|--------------|-----------|-----------|-----------|------------|
| ENSMUSG0000007805.4   | ENSMUSG0000007805.4   | ENSMUSG0000007805.4   | protein coding       | Twist2        | 12.4983802   | 1.38368429  | 3.15204337   | 1.0466883 | 3.0114443 | 0.0026001 | 0.0144061  |
| ENSMUSG0000019890.4   | ENSMUSG0000019890.4   | ENSMUSG0000019890.4   | protein coding       | Nts           | 0            | 62.30218432 | -8.508242337 | 1.2306213 | -6.913778 | 4.719E-12 | 1.264E-10  |
| ENSMUSG0000023094.14  | ENSMUSG0000023094.14  | ENSMUSG0000023094.14  | protein coding       | Msr2b         | 17.75578448  | 12.1817954  | 2.544010653  | 0.3861214 | 6.5886293 | 4.439E-11 | 1.053E-09  |
| ENSMUSG0000003153.10  | ENSMUSG0000003153.10  | ENSMUSG0000003153.10  | protein coding       | Sic2a3        | 5.68494722   | 28.66874987 | -2.35160425  | 0.6721624 | -3.498567 | 0.0004497 | 0.0032623  |
| ENSMUSG00000039062.15 | ENSMUSG00000039062.15 | ENSMUSG00000039062.15 | protein coding       | Anpep         | 12.87909821  | 2.453713134 | 2.36695998   | 0.82605   | 2.8891713 | 0.0038626 | 0.0020261  |
| ENSMUSG00000083282.2  | ENSMUSG00000083282.2  | ENSMUSG00000083282.2  | protein coding       | Cisf          | 6.371318071  | 0           | 5.032037102  | 1.6923157 | 9.273987  | 0.0029548 | 0.0015987  |
| ENSMUSG0000099568.1   | ENSMUSG0000099568.1   | ENSMUSG0000099568.1   | antisense RNA        | Gm2813        | 8.371121848  | 0.735069349 | 3.539833351  | 1.3969974 | 2.5338869 | 0.0112805 | 0.0487924  |
| ENSMUSG0000104231.1   | ENSMUSG0000104231.1   | ENSMUSG0000104231.1   | antisense RNA        | Gm37592       | 8.351813023  | 0           | 5.417110725  | 1.5357055 | 3.5274412 | 0.0004196 | 0.0029275  |
| ENSMUSG0000104350.1   | ENSMUSG0000104350.1   | ENSMUSG0000104350.1   | TEC                  | Gm38244       | 35.94628017  | 17.86655034 | 1.141252081  | 0.3900095 | 2.9262161 | 0.0034311 | 0.0180576  |
| ENSMUSG00000027314.6  | ENSMUSG00000027314.6  | ENSMUSG00000027314.6  | protein coding       | Dil4          | 18.86849385  | 65.06071152 | -1.77425208  | 3.818907  | -4.64643  | 3.377622  | 3.9177E-05 |
| ENSMUSG00000097451.10 | ENSMUSG00000097451.10 | ENSMUSG00000097451.10 | processed transcript | Rian          | 29.8205021   | 5.615739206 | 2.402012495  | 0.5919833 | 4.0575677 | 4.959E-05 | 0.0004488  |
| ENSMUSG0000020385.0   | ENSMUSG0000020385.0   | ENSMUSG0000020385.0   | protein coding       | Apa1          | 198.7547584  | 81.36676451 | 1.284167193  | 0.2067389 | 6.211541  | 5.237E-10 | 1.095E-08  |
| ENSMUSG0000020732.13  | ENSMUSG0000020732.13  | ENSMUSG0000020732.13  | protein coding       | Rab37         | 14.00259812  | 2.46483895  | 2.502189385  | 0.9553831 | 2.6190371 | 0.0068178 | 0.0397698  |
| ENSMUSG0000052430.15  | ENSMUSG0000052430.15  | ENSMUSG0000052430.15  | protein coding       | Bmpr1b        | 22.03903288  | 4.432667727 | 2.373124593  | 0.8497412 | 1.7503958 | 0.0095253 | 0.0287566  |
| ENSMUSG0000022636.13  | ENSMUSG0000022636.13  | ENSMUSG0000022636.13  | protein coding       | Alcam         | 2172.487303  | 872.7868111 | 1.315054379  | 0.0919447 | 14.302673 | 2.106E-46 | 3.705E-44  |
| ENSMUSG0000030041.9   | ENSMUSG0000030041.9   | ENSMUSG0000030041.9   | protein coding       | M1ap          | 23.12007232  | 6.794047684 | 1.778951292  | 0.627765  | 2.8332243 | 0.0046081 | 0.0233156  |
| ENSMUSG0000083856.1   | ENSMUSG0000083856.1   | ENSMUSG0000083856.1   | processed_pseudogene | Gm13886       | 19.44095179  | 6.712840323 | 1.534697052  | 0.5656144 | 1.7133273 | 0.0066611 | 0.0318087  |
| ENSMUSG0000021301.9   | ENSMUSG0000021301.9   | ENSMUSG0000021301.9   | protein coding       | Hecw1         | 52.99237964  | 16.64227767 | 1.670024631  | 0.4197831 | 3.9783035 | 6.941E-05 | 0.000599   |
| ENSMUSG0000041548.4   | ENSMUSG0000041548.4   | ENSMUSG0000041548.4   | protein coding       | Hspb8         | 206.794972   | 95.93466944 | 1.106389936  | 0.172338  | 6.4198837 | 1.364E-10 | 3.047E-09  |
| ENSMUSG0000054640.14  | ENSMUSG0000054640.14  | ENSMUSG0000054640.14  | protein coding       | Sic8a1        | 12.3474385   | 34.53844827 | -1.479670281 | 0.4314919 | -3.429196 | 0.006054  | 0.0040296  |
| ENSMUSG0000040584.8   | ENSMUSG0000040584.8   | ENSMUSG0000040584.8   | protein coding       | Abcb1a        | 748.1426543  | 285.503921  | 1.392232841  | 1.0303372 | 10.681705 | 1.24E-26  | 9.237E-25  |
| ENSMUSG0000020396.8   | ENSMUSG0000020396.8   | ENSMUSG0000020396.8   | protein coding       | Nefh          | 8.363912294  | 28.94378256 | -1.788755325 | 0.5391393 | -3.317654 | 0.009071  | 0.0057541  |
| ENSMUSG0000020183.11  | ENSMUSG0000020183.11  | ENSMUSG0000020183.11  | protein coding       | Cpm           | 17.7171922   | 72.7887057  | 1.238534003  | 0.2189728 | 6.5661078 | 1.548E-08 | 2.669E-07  |
| ENSMUSG0000035473.10  | ENSMUSG0000035473.10  | ENSMUSG0000035473.10  | protein coding       | Galm          | 17.05149769  | 49.54037335 | 1.529369848  | 0.4180919 | -3.657973 | 0.002542  | 0.0018999  |
| ENSMUSG0000031342.17  | ENSMUSG0000031342.17  | ENSMUSG0000031342.17  | protein coding       | Gpm6b         | 647.4342102  | 272.0644273 | -1.252479372 | 0.2789041 | 4.4907164 | 7.098E-06 | 7.72E-05   |
| ENSMUSG0000041020.14  | ENSMUSG0000041020.14  | ENSMUSG0000041020.14  | protein coding       | Map7d2        | 11.31152727  | 65.34300455 | -2.542187627 | 0.4189935 | -0.607368 | 1.3E-09   | 2.578E-08  |
| ENSMUSG0000055675.6   | ENSMUSG0000055675.6   | ENSMUSG0000055675.6   | protein coding       | Kbtbd11       | 64.88923595  | 25.14384332 | 1.36926211   | 0.3072339 | 4.4567412 | 8.321E-06 | 8.919E-05  |
| ENSMUSG0000038347.14  | ENSMUSG0000038347.14  | ENSMUSG0000038347.14  | protein coding       | Tctc2         | 144.5215638  | 387.8929908 | -1.422213205 | 0.1748267 | -8.134989 | 4.12E-16  | 1.612E-14  |
| ENSMUSG0000042429.8   | ENSMUSG0000042429.8   | ENSMUSG0000042429.8   | protein coding       | Adora1        | 0            | 6.241846655 | -5.193153502 | 1.7152896 | -3.027602 | 0.002465  | 0.0137693  |
| ENSMUSG0000027996.13  | ENSMUSG0000027996.13  | ENSMUSG0000027996.13  | protein coding       | Sfrp2         | 0.90823008   | 142.6468723 | -7.266161356 | 0.8746402 | -8.3076   | 9.766E-17 | 4.046E-15  |
| ENSMUSG000002565.16   | ENSMUSG000002565.16   | ENSMUSG000002565.16   | protein coding       | Scin          | 495.8932405  | 145.0534354 | 1.770985907  | 0.1348862 | 13.12948  | 2.232E-39 | 2.967E-37  |
| ENSMUSG0000032735.14  | ENSMUSG0000032735.14  | ENSMUSG0000032735.14  | protein coding       | Abim3         | 40.59069395  | 4.215742054 | 3.26128235   | 0.5278177 | 5.6935655 | 1.244E-08 | 2.176E-07  |
| ENSMUSG0000110635.1   | ENSMUSG0000110635.1   | ENSMUSG0000110635.1   | TEC                  | Gm49853       | 11.31527237  | 33.13394633 | -1.557709168 | 0.4838908 | -3.219134 | 0.0012858 | 0.0078179  |
| ENSMUSG0000029167.13  | ENSMUSG0000029167.13  | ENSMUSG0000029167.13  | protein coding       | Pparg1a       | 42.95934623  | 13.47839359 | 1.65820197   | 0.4505515 | 3.6804994 | 0.002328  | 0.0017607  |
| ENSMUSG0000032070.15  | ENSMUSG0000032070.15  | ENSMUSG0000032070.15  | protein coding       | Cnll1         | 118.7970767  | 14.24105739 | 3.069371422  | 0.3449482 | 8.843503  | 8.822E-19 | 4.23E-17   |
| ENSMUSG0000024846.5   | ENSMUSG0000024846.5   | ENSMUSG0000024846.5   | protein coding       | Cst8          | 44.27459434  | 10.57753042 | 2.013122393  | 0.4341573 | 4.6368501 | 5.358E-06 | 4.077E-05  |
| ENSMUSG0000032186.15  | ENSMUSG0000032186.15  | ENSMUSG0000032186.15  | protein coding       | Tmod2         | 28.79623825  | 59.19837407 | -1.047265309 | 0.3291491 | -3.181735 | 0.001464  | 0.00876    |
| ENSMUSG0000062393.13  | ENSMUSG0000062393.13  | ENSMUSG0000062393.13  | protein coding       | Dgkik         | 2115.473555  | 4772.412812 | 1.171761107  | 0.0849678 | 13.8189   | 1.96E-43  | 2.994E-41  |
| ENSMUSG0000097791.1   | ENSMUSG0000097791.1   | ENSMUSG0000097791.1   | lincRNA              | Gm17315       | 8.584638563  | 29.62990387 | -1.778628812 | 0.539554  | -3.296479 | 0.000979  | 0.0015533  |
| ENSMUSG0000056457.6   | ENSMUSG0000056457.6   | ENSMUSG0000056457.6   | protein coding       | Prifc2        | 8.855719761  | 52.61304241 | -2.55075991  | 0.785692  | -3.331312 | 0.000844  | 0.0006209  |
| ENSMUSG0000046186.8   | ENSMUSG0000046186.8   | ENSMUSG0000046186.8   | protein coding       | Cd109         | 52.9716046   | 6.854121542 | 2.997054758  | 0.48327   | 6.2016155 | 5.89E-10  | 1.159E-08  |
| ENSMUSG0000061013.5   | ENSMUSG0000061013.5   | ENSMUSG0000061013.5   | protein coding       | Mox1          | 2.760453193  | 40.41635632 | -3.859715412 | 0.7006477 | -5.80871  | 3.613E-08 | 5.898E-07  |
| ENSMUSG0000022323.11  | ENSMUSG0000022323.11  | ENSMUSG0000022323.11  | protein coding       | Rida          | 881.2944642  | 380.7946355 | 1.210086402  | 1.1018368 | 11.8826   | 1.458E-32 | 1.403E-30  |
| ENSMUSG0000014813.9   | ENSMUSG0000014813.9   | ENSMUSG0000014813.9   | protein coding       | Stc1          | 161.5796549  | 57.46039482 | 1.492958664  | 0.2164111 | 6.8988861 | 5.241E-12 | 1.402E-10  |
| ENSMUSG0000040219.4   | ENSMUSG0000040219.4   | ENSMUSG0000040219.4   | protein coding       | Tlcl2         | 28.58862325  | 7.848821793 | 1.866906702  | 0.6653494 | 2.8059044 | 0.0050176 | 0.0251253  |
| ENSMUSG0000015222.17  | ENSMUSG0000015222.17  | ENSMUSG0000015222.17  | protein coding       | Map2          | 203.5509494  | 3175.70954  | -3.965880091 | 0.2167117 | -18.30026 | 8.236E-75 | 2.984E-72  |
| ENSMUSG0000038304.14  | ENSMUSG0000038304.14  | ENSMUSG0000038304.14  | protein coding       | Cd160         | 5.602923554  | 0           | 4.839892711  | 1.6992971 | 2.848173  | 0.0043971 | 0.0223828  |
| ENSMUSG000004558.14   | ENSMUSG000004558.14   | ENSMUSG000004558.14   | protein coding       | Ndrp2         | 343.2432121  | 102.5947969 | 1.743185294  | 1.1545041 | 11.282456 | 1.602E-29 | 1.346E-27  |
| ENSMUSG0000025496.5   | ENSMUSG0000025496.5   | ENSMUSG0000025496.5   | protein coding       | Drd4          | 5.241825947  | 0           | 4.745707547  | 1.7246025 | 2.7517689 | 0.0059274 | 0.0288002  |
| ENSMUSG0000040111.16  | ENSMUSG0000040111.16  | ENSMUSG0000040111.16  | protein coding       | Gram1b        | 62.45059659  | 17.2571993  | 1.856899915  | 0.490975  | 3.7820664 | 0.001555  | 0.0012333  |
| ENSMUSG0000039997.16  | ENSMUSG0000039997.16  | ENSMUSG0000039997.16  | protein coding       | Ifi203        | 34.66549623  | 7.81920922  | 2.127706318  | 0.6272532 | 3.3921009 | 0.006936  | 0.045383   |
| ENSMUSG0000039375.16  | ENSMUSG0000039375.16  | ENSMUSG0000039375.16  | protein coding       | Wdr17         | 1.816460215  | 15.28891693 | -1.82684705  | 1.1628407 | -2.584138 | 0.0097623 | 0.0432065  |
| ENSMUSG0000028076.12  | ENSMUSG0000028076.12  | ENSMUSG0000028076.12  | protein coding       | Cd1d1         | 11.99903131  | 0.97244862  | 3.540356818  | 1.2443653 | 2.8451173 | 0.004395  | 0.0225734  |
| ENSMUSG0000029304.14  | ENSMUSG0000029304.14  | ENSMUSG0000029304.14  | protein coding       | Spp1          | 25371.75669  | 9326.680836 | 1.443766688  | 0.1003741 | 14.389861 | 6.534E-47 | 1.167E-46  |
| ENSMUSG0000028217.11  | ENSMUSG0000028217.11  | ENSMUSG0000028217.11  | protein coding       | Cdh17         | 112.0044405  | 23.45009791 | 2.251119516  | 0.3373001 | 6.6739651 | 2.49E-11  | 6.169E-10  |
| ENSMUSG0000039217.13  | ENSMUSG0000039217.13  | ENSMUSG0000039217.13  | protein coding       | lil18         | 0            | 4.626661863 | -4.725846994 | 1.7992582 | -2.643227 | 0.008212  | 0.0375598  |
| ENSMUSG0000097287.2   | ENSMUSG0000097287.2   | ENSMUSG0000097287.2   | lincRNA              | D130017N08Rik | 14.10554495  | 62.0730147  | -2.1317442   | 0.380889  | -5.596881 | 2.185E-08 | 3.67E-07   |
| ENSMUSG0000033616.9   | ENSMUSG0000033616.9   | ENSMUSG0000033616.9   | protein coding       | Mocos         | 174.3250371  | 85.2680284  | 1.028746084  | 0.2419485 | 4.2519047 | 1.12E-05  | 0.0002083  |
| ENSMUSG0000048989.8   | ENSMUSG0000048989.8   | ENSMUSG0000048989.8   | protein coding       | Rim8          | 2.364278865  | 15.47403888 | -2.87656008  | 0.8856045 | -3.02127  | 0.002172  | 0.014102   |
| ENSMUSG0000002688.7   | ENSMUSG0000002688.7   | ENSMUSG0000002688.7   | protein coding       | Dendc1        | 4.083132263  | 17.3975381  | -1.513548764 | 0.3179018 | -4.761057 | 1.926E-06 | 2.338E-05  |
| ENSMUSG0000103313.1   | ENSMUSG0000103313.1   | ENSMUSG0000103313.1   | TEC                  | Gm38357       | 40.87230002  | 139.6179584 | -1.76723069  | 0.300146  | -5.890482 | 3.851E-09 | 7.202E-08  |
| ENSMUSG0000048485.12  | ENSMUSG0000048485.12  | ENSMUSG0000048485.12  | protein coding       | Zbtb8b        | 15.88997663  | 60.37217777 | -1.931846459 | 0.3483054 | -5.546415 | 2.916E-08 | 8.454E-07  |
| ENSMUSG0000039742.15  | ENSMUSG0000039742.15  | ENSMUSG0000039742.15  | protein coding       | Fam711f       | 117.6739739  | 238.8343228 | 1.102344510  | 1.1604468 | -6.378719 | 1.786E-10 | 3.9E-09    |
| ENSMUSG0000020774.9   | ENSMUSG0000020774.9   | ENSMUSG0000020774.9   | protein coding       | Alp3          | 14.536560545 | 65.69985163 | -2.177567486 | 0.3756539 | -5.796763 | 6.761E-09 | 1.222E-07  |
| ENSMUSG0000051177.16  | ENSMUSG0000051177.16  | ENSMUSG0000051177.16  | protein coding       | Pscb1         | 23.00615291  | 2.723351724 | 3.043550115  | 1.7800196 | 3.90189   | 9.544E-05 | 0.0007977  |
| ENSMUSG0000003354.5   | ENSMUSG0000003354.5   | ENSMUSG0000003354.5   | protein coding       | Ccdc65        | 65.52537329  | 28.72617698 | 1.18237611   | 0.342948  | 3.4476836 | 0.005654  | 0.0037988  |
| ENSMUSG0000079363.7   | ENSMUSG0000079363.7   | ENSMUSG0000079363.7   |                      |               |              |             |              |           |           |           |            |

|                       |                       |                    |                        |           |             |             |              |           |           |           |           |
|-----------------------|-----------------------|--------------------|------------------------|-----------|-------------|-------------|--------------|-----------|-----------|-----------|-----------|
| ENSMUSG00000079293.11 | ENSMUSG00000079293.11 | ENSMUSG00000079293 | polymorphic_pseudogene | Clec7a    | 0           | 5.789339745 | -5.076206512 | 1.7522724 | -2.896928 | 0.0037684 | 0.019587  |
| ENSMUSG00000029409.7  | ENSMUSG00000029409.7  | ENSMUSG00000029409 | protein_coding         | U90926    | 148.7957898 | 5.431132852 | 4.733193185  | 0.4803759 | 9.8531036 | 6.646E-23 | 4.026E-21 |
| ENSMUSG00000102676.1  | ENSMUSG00000102676.1  | ENSMUSG00000102676 | TEC                    | Gm37435   | 0           | 10.78173825 | -5.981259725 | 1.496826  | -3.995962 | 6.443E-05 | 0.0005616 |
| ENSMUSG00000022836.10 | ENSMUSG00000022836.10 | ENSMUSG00000022836 | protein_coding         | Myk       | 217.2863832 | 46.58452536 | 2.220635052  | 0.2081594 | 10.667956 | 1.438E-26 | 1.067E-24 |
| ENSMUSG00000038965.15 | ENSMUSG00000038965.15 | ENSMUSG00000038965 | protein_coding         | Ube2l3    | 1316.622733 | 487.3787521 | 1.434227121  | 0.0979029 | 14.649479 | 1.358E-48 | 2.697E-46 |
| ENSMUSG00000029778.12 | ENSMUSG00000029778.12 | ENSMUSG00000029778 | protein_coding         | Adcyap1r1 | 0           | 8.237489972 | -5.586780134 | 1.5695518 | -3.559475 | 0.0003716 | 0.0026409 |
| ENSMUSG0000001995.9   | ENSMUSG0000001995.9   | ENSMUSG0000001995  | protein_coding         | Sipa1l2   | 138.2868126 | 540.1631543 | -1.964048812 | 0.1499069 | -13.10179 | 3.216E-39 | 4.214E-37 |
| ENSMUSG00000022037.15 | ENSMUSG00000022037.15 | ENSMUSG00000022037 | protein_coding         | Clu       | 12613.7444  | 31204.76763 | -1.306709261 | 0.0877525 | -14.89085 | 3.779E-50 | 7.846E-48 |
| ENSMUSG00000031131.11 | ENSMUSG00000031131.11 | ENSMUSG00000031131 | protein_coding         | Vgll1     | 6.243637148 | 25.92049977 | -2.06369992  | 0.5571663 | -3.703921 | 0.0002123 | 0.0016216 |
| ENSMUSG00000039717.16 | ENSMUSG00000039717.16 | ENSMUSG00000039717 | protein_coding         | Raiyl1    | 20.8500598  | 57.62409647 | -1.465064322 | 0.3876176 | -3.779664 | 0.000157  | 0.0012417 |
| ENSMUSG00000032202.11 | ENSMUSG00000032202.11 | ENSMUSG00000032202 | protein_coding         | Rab27a    | 24.55450567 | 8.85909264  | 1.474870911  | 0.5511816 | 2.6758346 | 0.0074543 | 0.0348007 |
| ENSMUSG00000050071.8  | ENSMUSG00000050071.8  | ENSMUSG00000050071 | protein_coding         | Bev1      | 324.248164  | 778.7702188 | -1.264537178 | 0.1123321 | -11.25713 | 2.138E-29 | 1.77E-27  |
| ENSMUSG00000059498.13 | ENSMUSG00000059498.13 | ENSMUSG00000059498 | protein_coding         | Fcg3      | 0           | 6.004467385 | -5.133803872 | 1.7311346 | -2.965456 | 0.0030223 | 0.0162724 |
| ENSMUSG00000043822.18 | ENSMUSG00000043822.18 | ENSMUSG00000043822 | protein_coding         | Adamtsl5  | 154.8143214 | 492.5691062 | -1.673837988 | 0.1651452 | -10.13555 | 3.842E-24 | 2.545E-22 |
| ENSMUSG00000063296.4  | ENSMUSG00000063296.4  | ENSMUSG00000063296 | protein_coding         | Tmem117   | 17.58926445 | 3.064189987 | 2.494161657  | 0.8478846 | 2.9416288 | 0.0032649 | 0.0173859 |
| ENSMUSG00000022076.9  | ENSMUSG00000022076.9  | ENSMUSG00000022076 | protein_coding         | Klhl1     | 282.5552124 | 615.7732489 | -1.124027529 | 0.1052046 | -10.68421 | 1.207E-26 | 9.065E-25 |
| ENSMUSG00000035557.9  | ENSMUSG00000035557.9  | ENSMUSG00000035557 | protein_coding         | Krt17     | 0           | 5.879874888 | -5.107603534 | 1.7254069 | -2.960231 | 0.0030741 | 0.0164933 |
| ENSMUSG0000000794.9   | ENSMUSG0000000794.9   | ENSMUSG0000000794  | protein_coding         | Kcnn3     | 377.4313987 | 987.8261794 | -1.388367228 | 0.1403503 | -9.892158 | 4.502E-23 | 2.782E-21 |
| ENSMUSG00000028111.4  | ENSMUSG00000028111.4  | ENSMUSG00000028111 | protein_coding         | Ctsk      | 5.92879444  | 0           | 4.921314723  | 1.7645208 | 2.7890375 | 0.0052865 | 0.0262379 |
| ENSMUSG00000003282.9  | ENSMUSG00000003282.9  | ENSMUSG00000003282 | protein_coding         | Plag1     | 88.83025917 | 272.4180287 | -1.618837451 | 0.364259  | -4.444194 | 8.822E-06 | 9.407E-05 |
| ENSMUSG00000000031.15 | ENSMUSG00000000031.15 | ENSMUSG00000000031 | lincRNA                | H19       | 30.38094442 | 2.908018078 | 3.40873199   | 0.7312407 | 4.6615733 | 3.138E-06 | 3.658E-05 |
| ENSMUSG00000025969.15 | ENSMUSG00000025969.15 | ENSMUSG00000025969 | protein_coding         | Nrp2      | 3440.623413 | 1542.547289 | 1.157384296  | 0.086457  | 13.386825 | 7.22E-41  | 1.018E-38 |
| ENSMUSG00000073000.3  | ENSMUSG00000073000.3  | ENSMUSG00000073000 | lincRNA                | Gm10451   | 12.5098106  | 0           | 6.002688763  | 1.4510985 | 4.1366514 | 3.524E-05 | 0.0003267 |
| ENSMUSG00000034057.8  | ENSMUSG00000034057.8  | ENSMUSG00000034057 | protein_coding         | Myrl1     | 0           | 7.151574671 | -5.383570302 | 1.7158288 | -3.137592 | 0.0017034 | 0.009936  |
| ENSMUSG00000026360.9  | ENSMUSG00000026360.9  | ENSMUSG00000026360 | protein_coding         | Rgs2      | 15.16571032 | 80.103375   | -2.399232016 | 0.3548604 | -6.761058 | 1.37E-11  | 3.501E-10 |
| ENSMUSG00000029287.14 | ENSMUSG00000029287.14 | ENSMUSG00000029287 | protein_coding         | Tgfr3     | 74.65269339 | 26.52344688 | 1.502798529  | 0.3400847 | 4.4188949 | 9.921E-06 | 0.0001043 |

Supplementary Table 2. Significant differentially expressed genes and pathways in SPC-Cre KPG and KP cell lines. [MetaCore](#) Top 10 upregulated and downregulated canonical pathways in KPG cells using all significant genes listed in SPC-Cre KPG-KP lab.

| PATHWAY                                                                                                                  | DIRECTION            | TOTAL | pvalue    | MIN FDR   | pvalue    | FDR       | LOG10 IN DATA | NETWORK OBJECTS FROM ACTIVE DATA                                                                                             |
|--------------------------------------------------------------------------------------------------------------------------|----------------------|-------|-----------|-----------|-----------|-----------|---------------|------------------------------------------------------------------------------------------------------------------------------|
| Probable BMP4-mediated induction of EMT in airway epithelium                                                             | Upregulated in KPG   | 21    | 2.173E-03 | 2.520E-03 | 2.173E-06 | 2.520E-03 | 2.59          | CCL1A1, SMAD9 (SMAD8), N-cadherin, TCF8, SNAIL1, TWIST1, SIP1 (ZFHX1B)                                                       |
| PGE2 pathways in cancer                                                                                                  | Upregulated in KPG   | 55    | 6.487E-06 | 3.406E-03 | 6.487E-06 | 3.406E-03 | 2.47          | G-protein beta/gamma, COX-1 (PTGS1), Tcf(Lef), PKA-reg (cAMP-dependent), EGFR, Axin, PGES, Lef-1, Adenylate cyclase, SLC21A2 |
| Stem cells: Extramembranous differentiation of embryonic stem cells                                                      | Upregulated in KPG   | 35    | 9.388E-06 | 3.406E-03 | 9.388E-06 | 3.406E-03 | 2.47          | SMAD9 (SMAD8), SOX2, Grem1, GATA-6, BMP7, BMP2, NCAM1, Transferrin                                                           |
| E-cadherin signaling and its regulation in gastric cancer                                                                | Upregulated in KPG   | 38    | 1.175E-05 | 3.406E-03 | 1.175E-05 | 3.406E-03 | 2.47          | TCF8, EGFR, SNAIL1, BMP9, Fzd9, TWIST1, SIP1 (ZFHX1B), EGF1                                                                  |
| Hedgehog signaling in gastric cancer                                                                                     | Upregulated in KPG   | 29    | 2.350E-05 | 4.378E-03 | 2.350E-05 | 4.378E-03 | 2.38          | N-cadherin, ROBO1, CUX2, ROR2, HNF3-beta, TWIST2, SIP1 (ZFHX1B)                                                              |
| Stem cells: Hedgehog, BMP and Parathyroid hormone in osteogenesis                                                        | Upregulated in KPG   | 51    | 2.432E-05 | 4.378E-03 | 2.432E-05 | 4.378E-03 | 2.38          | CCL1A1, SMAD9 (SMAD8), Osteopontin, PKA-reg (cAMP-dependent), BMP7, Adenylate cyclase, BMPR1B, BMP2, PLC-beta                |
| Stem cells: Role of BMP signaling in embryonic stem cell neural differentiation                                          | Upregulated in KPG   | 30    | 2.984E-05 | 4.378E-03 | 2.984E-05 | 4.378E-03 | 2.38          | SMAD9 (SMAD8), SOX2, Chordin, BMP7, BMPR1B, BMP2, NCAM1                                                                      |
| Hypoxia-induced EMT in cancer and fibrosis                                                                               | Upregulated in KPG   | 13    | 3.019E-05 | 4.378E-03 | 3.019E-05 | 4.378E-03 | 2.38          | TCF8, SNAIL1, Lysyl oxidase, TWIST1, SIP1 (ZFHX1B)                                                                           |
| Development: TGF-beta-dependent induction of EMT via SMAD9                                                               | Upregulated in KPG   | 35    | 8.619E-05 | 9.160E-03 | 8.619E-05 | 9.160E-03 | 2.04          | N-cadherin, Vimentin, TCF8, SNAIL1, Lef-1, TWIST1, SIP1 (ZFHX1B)                                                             |
| Stem cells: Schema: TGF signaling in embryonic stem cell self-renewal and differentiation                                | Upregulated in KPG   | 47    | 9.044E-05 | 9.160E-03 | 9.044E-05 | 9.160E-03 | 2.04          | TTF1, SOX2, Grem1, GATA-6, HNF3-beta, BMP2, NCAM1, TGF1                                                                      |
| Regulation of immune cell differentiation by Notch signaling                                                             | Downregulated in KPG | 43    | 0.0003363 | 0.0003363 | 0.0003363 | 0.0003363 | 0.49          | #202a, NOTCH3 (3ICD), DLL1, DLL4, PSK cat class IA, NOTCH3                                                                   |
| Gastric cancer (general scheme)                                                                                          | Downregulated in KPG | 41    | 0.0019784 | 0.4839065 | 0.0019784 | 0.4839065 | 0.32          | ESK2, DLL1, DLL4, Phox2b, NOTCH3                                                                                             |
| NF-AT signaling in cardiac hypertrophy                                                                                   | Downregulated in KPG | 65    | 0.0032426 | 0.4839065 | 0.0032426 | 0.4839065 | 0.32          | Cardiotropin-1, NF-AT3/NFATC4, PKC- $\alpha$ , PI3K cat class IA, NOTCH3                                                     |
| Stem cells: Schema: TGF signaling in embryonic stem cell self-renewal and differentiation                                | Downregulated in KPG | 47    | 0.0036379 | 0.4839065 | 0.0036379 | 0.4839065 | 0.32          | SPRY2, Adhvin A, GATA-2, SOX17, NEFH                                                                                         |
| Role of Shh and Notch in SCLC                                                                                            | Downregulated in KPG | 30    | 0.0045469 | 0.4839065 | 0.0045469 | 0.4839065 | 0.32          | DLL1, CD133, ALA1, ENO2                                                                                                      |
| Protein folding and maturation: Posttranslational processing of neuroendocrine peptides                                  | Downregulated in KPG | 50    | 0.0047633 | 0.4839065 | 0.0047633 | 0.4839065 | 0.32          | NN, NTFNN, NT, LargeN, LargeNN                                                                                               |
| wcCFR and deltaF508 traffic / Late endosome and lysosome (normal and CF)                                                 | Downregulated in KPG | 16    | 0.0048201 | 0.4839065 | 0.0048201 | 0.4839065 | 0.32          | Syntaxin 6, CFTR, Slp5                                                                                                       |
| Stem cells: Endothelial differentiation during embryonic development                                                     | Downregulated in KPG | 51    | 0.0051878 | 0.4839065 | 0.0051878 | 0.4839065 | 0.32          | GATA2, DLL4, TIE2, PI3K cat class IA, Neuroglin-1                                                                            |
| Notch signaling in breast cancer                                                                                         | Downregulated in KPG | 53    | 0.0061161 | 0.4839065 | 0.0061161 | 0.4839065 | 0.32          | TFF1, NOTCH3 (3ICD), DLL1, DLL4, NOTCH3                                                                                      |
| Development: Epigenetic and transcriptional regulation of oligodendrocyte precursor cell differentiation and myelination | Downregulated in KPG | 34    | 0.0064054 | 0.4839065 | 0.0064054 | 0.4839065 | 0.32          | UGT8, SMRT, SOX17, Fruzzed                                                                                                   |

**Supplementary Table 2.** Significant differentially expressed genes and pathways in SPC-Cre KPG and KP cell lines. GSEA: Top 25 Hallmarks Pathways upregulated and downregulated of a pre-ranked list of significantly expressed genes (P-adjusted < 0.05; n = 4,304) in KPG compared to KP cells.

| NAME                                       | DIRECTION            | SIZE | ES        | NES       | NOM p-val | FDR q-val | FWER p-val | RANK AT MAX | LEADING EDGE                    |
|--------------------------------------------|----------------------|------|-----------|-----------|-----------|-----------|------------|-------------|---------------------------------|
| HALLMARK_ADIPOGENESIS                      | Upregulated in KPG   | 64   | 0.3087746 | 2.8973925 | 0         | 0         | 0          | 1944        | tags=81%, list=51%, signal=163% |
| HALLMARK_EPITHELIAL_MESENCHYMAL_TRANSITION | Upregulated in KPG   | 80   | 0.2393306 | 2.4799433 | 0         | 0.0030972 | 0.006      | 680         | tags=41%, list=18%, signal=49%  |
| HALLMARK_XENOBIOTIC_METABOLISM             | Upregulated in KPG   | 68   | 0.246631  | 2.3704953 | 0         | 0.0051904 | 0.015      | 1490        | tags=63%, list=39%, signal=102% |
| HALLMARK_HEME_METABOLISM                   | Upregulated in KPG   | 55   | 0.2720178 | 2.368931  | 0.0021097 | 0.0038928 | 0.015      | 1337        | tags=62%, list=35%, signal=94%  |
| HALLMARK_INTERFERON_ALPHA_RESPONSE         | Upregulated in KPG   | 30   | 0.3143988 | 2.0540638 | 0         | 0.0176706 | 0.077      | 1737        | tags=77%, list=45%, signal=139% |
| HALLMARK_HYPOXIA                           | Upregulated in KPG   | 69   | 0.209919  | 2.0342999 | 0.0059172 | 0.0162403 | 0.084      | 1593        | tags=62%, list=42%, signal=105% |
| HALLMARK_BILE_ACID_METABOLISM              | Upregulated in KPG   | 29   | 0.2875987 | 1.8590988 | 0.016129  | 0.0405127 | 0.223      | 1544        | tags=69%, list=40%, signal=115% |
| HALLMARK_OXIDATIVE_PHOSPHORYLATION         | Upregulated in KPG   | 56   | 0.2105683 | 1.8454502 | 0.0061475 | 0.0384866 | 0.238      | 2209        | tags=79%, list=58%, signal=183% |
| HALLMARK_MYOGENESIS                        | Upregulated in KPG   | 54   | 0.2072423 | 1.7691535 | 0.012     | 0.0515419 | 0.335      | 846         | tags=43%, list=22%, signal=54%  |
| HALLMARK_GLYCOLYSIS                        | Upregulated in KPG   | 80   | 0.1373864 | 1.4076837 | 0.1072165 | 0.2562518 | 0.895      | 1587        | tags=55%, list=42%, signal=92%  |
| HALLMARK_PROTEIN_SECRETION                 | Upregulated in KPG   | 31   | 0.2156891 | 1.388687  | 0.1212766 | 0.2523617 | 0.912      | 2017        | tags=74%, list=53%, signal=156% |
| HALLMARK_ALLOGRAFT_REJECTION               | Upregulated in KPG   | 40   | 0.1893046 | 1.387612  | 0.1133201 | 0.2325755 | 0.913      | 2054        | tags=73%, list=54%, signal=155% |
| HALLMARK_IL2_STAT5_SIGNALING               | Upregulated in KPG   | 69   | 0.1388686 | 1.3419819 | 0.128991  | 0.2639448 | 0.956      | 918         | tags=38%, list=24%, signal=49%  |
| HALLMARK_IL6_JAK_STAT3_SIGNALING           | Upregulated in KPG   | 22   | 0.2351675 | 1.3211472 | 0.1425662 | 0.2674708 | 0.967      | 1885        | tags=73%, list=49%, signal=143% |
| HALLMARK_INTERFERON_GAMMA_RESPONSE         | Upregulated in KPG   | 53   | 0.1435594 | 1.2341661 | 0.203125  | 0.3435778 | 0.991      | 2054        | tags=68%, list=54%, signal=145% |
| HALLMARK_FATTY_ACID_METABOLISM             | Upregulated in KPG   | 52   | 0.1366048 | 1.140919  | 0.2900609 | 0.4467276 | 0.997      | 1248        | tags=46%, list=33%, signal=68%  |
| HALLMARK_ANGIOGENESIS                      | Upregulated in KPG   | 16   | 0.2369285 | 1.104808  | 0.3380567 | 0.4706182 | 0.998      | 1486        | tags=63%, list=39%, signal=102% |
| HALLMARK_ANDROGEN_RESPONSE                 | Upregulated in KPG   | 32   | 0.152688  | 1.0580735 | 0.3723609 | 0.514609  | 1          | 973         | tags=41%, list=25%, signal=54%  |
| HALLMARK_COAGULATION                       | Upregulated in KPG   | 35   | 0.1463428 | 1.0255752 | 0.4047619 | 0.5340839 | 1          | 646         | tags=31%, list=17%, signal=37%  |
| HALLMARK_PEROXISOME                        | Upregulated in KPG   | 31   | 0.1551637 | 1.0100205 | 0.4388778 | 0.531258  | 1          | 1630        | tags=58%, list=43%, signal=100% |
| HALLMARK_MTORC1_SIGNALING                  | Upregulated in KPG   | 71   | 0.0970258 | 0.9532559 | 0.5129311 | 0.5937614 | 1          | 927         | tags=34%, list=24%, signal=44%  |
| HALLMARK_APOPTOSIS                         | Upregulated in KPG   | 49   | 0.1168831 | 0.9423836 | 0.5297619 | 0.5837251 | 1          | 572         | tags=27%, list=15%, signal=31%  |
| HALLMARK_INFLAMMATORY_RESPONSE             | Upregulated in KPG   | 61   | 0.0984827 | 0.9180151 | 0.5671937 | 0.5935605 | 1          | 1195        | tags=41%, list=31%, signal=59%  |
| HALLMARK_SPERMATOGENESIS                   | Upregulated in KPG   | 24   | 0.139613  | 0.8377472 | 0.6715177 | 0.6831927 | 1          | 2813        | tags=88%, list=74%, signal=329% |
| HALLMARK_TGF_BETA_SIGNALING                | Upregulated in KPG   | 21   | 0.1344383 | 0.7427978 | 0.7992203 | 0.789022  | 1          | 1854        | tags=62%, list=49%, signal=120% |
| HALLMARK_E2F_TARGETS                       | Downregulated in KPG | 58   | -0.289842 | -2.590151 | 0         | 0         | 0          | 1480        | tags=67%, list=39%, signal=108% |
| HALLMARK_G2M_CHECKPOINT                    | Downregulated in KPG | 57   | -0.27518  | -2.451213 | 0         | 0.000864  | 0.002      | 1580        | tags=68%, list=41%, signal=115% |
| HALLMARK_MYC_TARGETS_V1                    | Downregulated in KPG | 55   | -0.195159 | -1.689979 | 0.028169  | 0.1725581 | 0.453      | 1837        | tags=67%, list=48%, signal=128% |
| HALLMARK_CHOLESTEROL_HOMEOSTASIS           | Downregulated in KPG | 35   | -0.236969 | -1.674563 | 0.0226415 | 0.1399269 | 0.477      | 1506        | tags=63%, list=39%, signal=103% |
| HALLMARK_TNFA_SIGNALING_VIA_NFKB           | Downregulated in KPG | 65   | -0.148523 | -1.407578 | 0.1078067 | 0.3877018 | 0.899      | 913         | tags=38%, list=24%, signal=50%  |
| HALLMARK_ESTROGEN_RESPONSE_EARLY           | Downregulated in KPG | 78   | -0.136752 | -1.396809 | 0.107943  | 0.3389201 | 0.907      | 518         | tags=27%, list=14%, signal=31%  |
| HALLMARK_KRAS_SIGNALING_DN                 | Downregulated in KPG | 35   | -0.196462 | -1.376531 | 0.1284585 | 0.3163018 | 0.923      | 1987        | tags=71%, list=52%, signal=147% |
| HALLMARK_KRAS_SIGNALING_UP                 | Downregulated in KPG | 79   | -0.130563 | -1.313629 | 0.1729622 | 0.3606851 | 0.966      | 238         | tags=19%, list=6%, signal=20%   |
| HALLMARK_COMPLEMENT                        | Downregulated in KPG | 55   | -0.133765 | -1.159425 | 0.2620545 | 0.5715651 | 0.998      | 331         | tags=22%, list=9%, signal=24%   |
| HALLMARK_UNFOLDED_PROTEIN_RESPONSE         | Downregulated in KPG | 43   | -0.141787 | -1.088666 | 0.3514563 | 0.6399371 | 1          | 2665        | tags=84%, list=70%, signal=273% |
| HALLMARK_UV_RESPONSE_UP                    | Downregulated in KPG | 48   | -0.134638 | -1.086468 | 0.3527132 | 0.5862522 | 1          | 2439        | tags=77%, list=64%, signal=210% |
| HALLMARK_ESTROGEN_RESPONSE_LATE            | Downregulated in KPG | 71   | -0.109334 | -1.072391 | 0.3466136 | 0.5611009 | 1          | 829         | tags=32%, list=22%, signal=41%  |
| HALLMARK_P53_PATHWAY                       | Downregulated in KPG | 63   | -0.09781  | -0.884625 | 0.5783898 | 0.8654372 | 1          | 1514        | tags=49%, list=40%, signal=80%  |
| HALLMARK_UV_RESPONSE_DN                    | Downregulated in KPG | 54   | -0.09678  | -0.834176 | 0.65286   | 0.9006521 | 1          | 698         | tags=28%, list=18%, signal=34%  |
| HALLMARK_DNA_REPAIR                        | Downregulated in KPG | 31   | -0.119681 | -0.789318 | 0.7534791 | 0.9234579 | 1          | 3246        | tags=97%, list=85%, signal=637% |
| HALLMARK_WNT_BETA_CATENIN_SIGNALING        | Downregulated in KPG | 17   | -0.155693 | -0.782687 | 0.7391304 | 0.8767106 | 1          | 1432        | tags=63%, list=37%, signal=84%  |
| HALLMARK_APICAL_JUNCTION                   | Downregulated in KPG | 65   | -0.080543 | -0.760303 | 0.7930368 | 0.8606477 | 1          | 404         | tags=18%, list=11%, signal=20%  |
| HALLMARK_PI3K_AKT_MTOR_SIGNALING           | Downregulated in KPG | 32   | -0.104106 | -0.691927 | 0.8742268 | 0.9010095 | 1          | 3309        | tags=97%, list=87%, signal=716% |
| HALLMARK_MITOTIC_SPINDLE                   | Downregulated in KPG | 59   | -0.053825 | -0.476869 | 0.9959596 | 0.9939423 | 1          | 3167        | tags=88%, list=83%, signal=506% |
