# Supplementary material
Source: PubMed Central journal article supplement (PMC7195258)
Supplement: NIHMS1566883-supplement-5.pdf [file NIHMS1566883-supplement-5.pdf]

**Supplementary Table 4.** ATAC-seq peaks and Motif analysis. ATAC-seq Peaks: List of all ATAC peaks in SPC-Cre KP and KPG cells.

| <b>Chr</b> | <b>Start</b> | <b>End</b> |
|------------|--------------|------------|
| chr1       | 3045792      | 3045975    |
| chr1       | 3046415      | 3046725    |
| chr1       | 3164926      | 3165132    |
| chr1       | 3249335      | 3249508    |
| chr1       | 3472092      | 3472316    |
| chr1       | 3493475      | 3494045    |
| chr1       | 3514631      | 3515318    |
| chr1       | 3517047      | 3517269    |
| chr1       | 3534806      | 3535070    |
| chr1       | 3611117      | 3611529    |
| chr1       | 3670682      | 3670961    |
| chr1       | 3670961      | 3671240    |
| chr1       | 3671310      | 3671983    |
| chr1       | 3671983      | 3672381    |
| chr1       | 3672381      | 3672652    |
| chr1       | 3858985      | 3859148    |
| chr1       | 4256446      | 4256608    |
| chr1       | 4256713      | 4257248    |
| chr1       | 4257343      | 4257539    |
| chr1       | 4257539      | 4257706    |
| chr1       | 4258219      | 4258755    |
| chr1       | 4434873      | 4435047    |
| chr1       | 4473908      | 4474080    |
| chr1       | 4491821      | 4492303    |
| chr1       | 4492303      | 4492571    |
| chr1       | 4492571      | 4492814    |
| chr1       | 4492940      | 4493103    |
| chr1       | 4493103      | 4493292    |
| chr1       | 4493292      | 4493482    |
| chr1       | 4493482      | 4493813    |
| chr1       | 4571240      | 4571633    |
| chr1       | 4571633      | 4572254    |
| chr1       | 4581998      | 4582243    |
| chr1       | 4586165      | 4586690    |
| chr1       | 4602397      | 4602710    |
| chr1       | 4622507      | 4622687    |
| chr1       | 4628385      | 4628595    |

|      |         |         |
|------|---------|---------|
| chr1 | 4666003 | 4666256 |
| chr1 | 4670656 | 4670942 |
| chr1 | 4671272 | 4671722 |
| chr1 | 4671722 | 4672145 |
| chr1 | 4672393 | 4672715 |
| chr1 | 4698549 | 4699183 |
| chr1 | 4706078 | 4706650 |
| chr1 | 4722232 | 4722475 |
| chr1 | 4722475 | 4722992 |
| chr1 | 4751319 | 4751645 |
| chr1 | 4762337 | 4762517 |
| chr1 | 4771042 | 4771225 |
| chr1 | 4780169 | 4780387 |
| chr1 | 4785254 | 4785592 |
| chr1 | 4785592 | 4785937 |
| chr1 | 4785949 | 4786113 |
| chr1 | 4786113 | 4786284 |
| chr1 | 4798442 | 4798658 |
| chr1 | 4807404 | 4807916 |
| chr1 | 4807916 | 4808269 |
| chr1 | 4857374 | 4857684 |
| chr1 | 4857684 | 4857878 |
| chr1 | 4857878 | 4858204 |
| chr1 | 4858204 | 4858498 |
| chr1 | 4858517 | 4858739 |
| chr1 | 4880600 | 4880810 |
| chr1 | 5008031 | 5008212 |
| chr1 | 5015363 | 5015745 |
| chr1 | 5018730 | 5018921 |
| chr1 | 5019083 | 5019297 |
| chr1 | 5019297 | 5019506 |
| chr1 | 5019506 | 5019791 |
| chr1 | 5019803 | 5019978 |
| chr1 | 5019978 | 5020176 |
| chr1 | 5020204 | 5020382 |
| chr1 | 5022803 | 5023053 |
| chr1 | 5070292 | 5070544 |
| chr1 | 5072053 | 5072271 |
| chr1 | 5072386 | 5072772 |
| chr1 | 5072772 | 5072980 |
| chr1 | 5082728 | 5082969 |
| chr1 | 5082969 | 5083245 |

|      |         |         |
|------|---------|---------|
| chr1 | 5083245 | 5083660 |
| chr1 | 5129596 | 5129875 |
| chr1 | 5206784 | 5206954 |
| chr1 | 5588300 | 5588522 |
| chr1 | 5910025 | 5910296 |
| chr1 | 5917035 | 5917195 |
| chr1 | 6135221 | 6135371 |
| chr1 | 6193651 | 6193816 |
| chr1 | 6214105 | 6214464 |
| chr1 | 6214464 | 6214767 |
| chr1 | 6214767 | 6215068 |
| chr1 | 6215068 | 6215324 |
| chr1 | 6215352 | 6215513 |
| chr1 | 6272291 | 6272571 |
| chr1 | 6279690 | 6279928 |
| chr1 | 6279928 | 6280165 |
| chr1 | 6280209 | 6280783 |
| chr1 | 6288040 | 6288295 |
| chr1 | 6289690 | 6290044 |
| chr1 | 6304875 | 6305065 |
| chr1 | 6306690 | 6307143 |
| chr1 | 6311446 | 6311650 |
| chr1 | 6311650 | 6311922 |
| chr1 | 6311922 | 6312319 |
| chr1 | 6330701 | 6330931 |
| chr1 | 6359026 | 6359581 |
| chr1 | 6382613 | 6383014 |
| chr1 | 6383014 | 6383408 |
| chr1 | 6388094 | 6388326 |
| chr1 | 6406477 | 6406629 |
| chr1 | 6410167 | 6410390 |
| chr1 | 6454033 | 6454190 |
| chr1 | 6454220 | 6454536 |
| chr1 | 6457653 | 6458388 |
| chr1 | 6459810 | 6460129 |
| chr1 | 6460164 | 6460364 |
| chr1 | 6509974 | 6510182 |
| chr1 | 6623908 | 6624364 |
| chr1 | 6624424 | 6624767 |
| chr1 | 6755385 | 6755674 |
| chr1 | 6756934 | 6757135 |
| chr1 | 6818572 | 6818750 |

|      |         |         |
|------|---------|---------|
| chr1 | 6869155 | 6869349 |
| chr1 | 6875522 | 6875720 |
| chr1 | 6907168 | 6907384 |
| chr1 | 6966389 | 6966573 |
| chr1 | 6966573 | 6966775 |
| chr1 | 6969620 | 6969786 |
| chr1 | 6969825 | 6970259 |
| chr1 | 6973987 | 6974264 |
| chr1 | 6980427 | 6980681 |
| chr1 | 7053430 | 7053608 |
| chr1 | 7088413 | 7088913 |
| chr1 | 7088913 | 7089305 |
| chr1 | 7177645 | 7177795 |
| chr1 | 7199618 | 7199773 |
| chr1 | 7206195 | 7206574 |
| chr1 | 7206675 | 7206896 |
| chr1 | 7375804 | 7376033 |
| chr1 | 7397586 | 7397866 |
| chr1 | 7397866 | 7398514 |
| chr1 | 7476612 | 7476786 |
| chr1 | 7499102 | 7499337 |
| chr1 | 7707469 | 7707849 |
| chr1 | 7709172 | 7709540 |
| chr1 | 7750774 | 7750974 |
| chr1 | 7898854 | 7899448 |
| chr1 | 7966745 | 7966975 |
| chr1 | 8190162 | 8190318 |
| chr1 | 8196842 | 8197000 |
| chr1 | 8686019 | 8686244 |
| chr1 | 9133089 | 9133292 |
| chr1 | 9153926 | 9154142 |
| chr1 | 9235199 | 9235389 |
| chr1 | 9237128 | 9237303 |
| chr1 | 9238155 | 9238657 |
| chr1 | 9239926 | 9240109 |
| chr1 | 9530528 | 9530827 |
| chr1 | 9541334 | 9541554 |
| chr1 | 9545068 | 9545472 |
| chr1 | 9545472 | 9545782 |
| chr1 | 9545782 | 9546014 |
| chr1 | 9546014 | 9546230 |
| chr1 | 9547958 | 9548217 |

|      |         |         |
|------|---------|---------|
| chr1 | 9548554 | 9549005 |
| chr1 | 9561514 | 9561705 |
| chr1 | 9573305 | 9573526 |
| chr1 | 9593096 | 9593302 |
| chr1 | 9621465 | 9621730 |
| chr1 | 9627393 | 9627699 |
| chr1 | 9630263 | 9630488 |
| chr1 | 9630552 | 9630908 |
| chr1 | 9630927 | 9631272 |
| chr1 | 9631540 | 9631940 |
| chr1 | 9636403 | 9636672 |
| chr1 | 9636846 | 9637357 |
| chr1 | 9638708 | 9638871 |
| chr1 | 9640874 | 9641197 |
| chr1 | 9642176 | 9642332 |
| chr1 | 9699886 | 9700530 |
| chr1 | 9700530 | 9700920 |
| chr1 | 9747432 | 9747704 |
| chr1 | 9747772 | 9748179 |
| chr1 | 9748179 | 9748763 |
| chr1 | 9754997 | 9755310 |
| chr1 | 9755310 | 9755650 |
| chr1 | 9755650 | 9755974 |
| chr1 | 9756053 | 9756482 |
| chr1 | 9764592 | 9764834 |
| chr1 | 9772800 | 9773082 |
| chr1 | 9773088 | 9773455 |
| chr1 | 9773455 | 9773775 |
| chr1 | 9797816 | 9798719 |
| chr1 | 9799111 | 9799261 |
| chr1 | 9805505 | 9805754 |
| chr1 | 9847709 | 9847904 |
| chr1 | 9847904 | 9848146 |
| chr1 | 9848146 | 9848809 |
| chr1 | 9937333 | 9937502 |
| chr1 | 9938652 | 9939039 |
| chr1 | 9943649 | 9943963 |
| chr1 | 9943963 | 9944327 |
| chr1 | 9947237 | 9947507 |
| chr1 | 9947580 | 9947980 |
| chr1 | 9967019 | 9967519 |
| chr1 | 9967519 | 9967855 |

|      |          |          |
|------|----------|----------|
| chr1 | 9967855  | 9968104  |
| chr1 | 9968104  | 9968370  |
| chr1 | 9983030  | 9983500  |
| chr1 | 9985747  | 9985897  |
| chr1 | 9986753  | 9986958  |
| chr1 | 9989896  | 9990350  |
| chr1 | 10007290 | 10007544 |
| chr1 | 10009002 | 10009292 |
| chr1 | 10037467 | 10037669 |
| chr1 | 10037800 | 10038062 |
| chr1 | 10038062 | 10038312 |
| chr1 | 10039486 | 10039722 |
| chr1 | 10039722 | 10039947 |
| chr1 | 10039947 | 10040298 |
| chr1 | 10049475 | 10049723 |
| chr1 | 10089603 | 10089849 |
| chr1 | 10099687 | 10099892 |
| chr1 | 10100494 | 10100692 |
| chr1 | 10100692 | 10101147 |
| chr1 | 10101184 | 10101500 |
| chr1 | 10101588 | 10101893 |
| chr1 | 10113768 | 10114089 |
| chr1 | 10114207 | 10114358 |
| chr1 | 10114773 | 10115273 |
| chr1 | 10131927 | 10132077 |
| chr1 | 10132611 | 10133046 |
| chr1 | 10139407 | 10139612 |
| chr1 | 10165760 | 10166003 |
| chr1 | 10170248 | 10170510 |
| chr1 | 10170510 | 10170811 |
| chr1 | 10177971 | 10178171 |
| chr1 | 10232022 | 10232473 |
| chr1 | 10232473 | 10232841 |
| chr1 | 10232841 | 10233230 |
| chr1 | 10233230 | 10233499 |
| chr1 | 10233557 | 10233720 |
| chr1 | 10247962 | 10248206 |
| chr1 | 10253631 | 10253875 |
| chr1 | 10253890 | 10254207 |
| chr1 | 10254420 | 10254654 |
| chr1 | 10255140 | 10255334 |
| chr1 | 10255585 | 10255810 |

|      |          |          |
|------|----------|----------|
| chr1 | 10256694 | 10257080 |
| chr1 | 10257204 | 10257565 |
| chr1 | 10257565 | 10257853 |
| chr1 | 10263814 | 10264251 |
| chr1 | 10265293 | 10265612 |
| chr1 | 10271995 | 10272241 |
| chr1 | 10278774 | 10279008 |
| chr1 | 10283300 | 10283569 |
| chr1 | 10284651 | 10284977 |
| chr1 | 10285140 | 10285393 |
| chr1 | 10285393 | 10285627 |
| chr1 | 10285627 | 10285850 |
| chr1 | 10285850 | 10286091 |
| chr1 | 10293029 | 10293179 |
| chr1 | 10298045 | 10298290 |
| chr1 | 10300438 | 10300871 |
| chr1 | 10300871 | 10301227 |
| chr1 | 10307491 | 10307746 |
| chr1 | 10311211 | 10311725 |
| chr1 | 10311875 | 10312209 |
| chr1 | 10327757 | 10328297 |
| chr1 | 10328297 | 10328580 |
| chr1 | 10380854 | 10381104 |
| chr1 | 10397994 | 10398153 |
| chr1 | 10459962 | 10460209 |
| chr1 | 10478334 | 10478574 |
| chr1 | 10478574 | 10478882 |
| chr1 | 10486361 | 10486709 |
| chr1 | 10544710 | 10545216 |
| chr1 | 10571008 | 10571300 |
| chr1 | 10592530 | 10593015 |
| chr1 | 10593151 | 10593553 |
| chr1 | 10598264 | 10598480 |
| chr1 | 10603297 | 10603734 |
| chr1 | 10708937 | 10709206 |
| chr1 | 10710022 | 10710377 |
| chr1 | 10719898 | 10720102 |
| chr1 | 10759519 | 10759826 |
| chr1 | 10797703 | 10797913 |
| chr1 | 10853691 | 10853885 |
| chr1 | 10872305 | 10872688 |
| chr1 | 10872706 | 10873081 |

|      |          |          |
|------|----------|----------|
| chr1 | 10878242 | 10878511 |
| chr1 | 10878511 | 10878751 |
| chr1 | 10880042 | 10880314 |
| chr1 | 10880369 | 10880661 |
| chr1 | 10898774 | 10899170 |
| chr1 | 10899176 | 10899445 |
| chr1 | 10902632 | 10903006 |
| chr1 | 10932456 | 10932716 |
| chr1 | 10932766 | 10932996 |
| chr1 | 10932996 | 10933265 |
| chr1 | 10933265 | 10933632 |
| chr1 | 10940304 | 10940691 |
| chr1 | 10955231 | 10955632 |
| chr1 | 10993349 | 10993740 |
| chr1 | 10993740 | 10994064 |
| chr1 | 11065259 | 11065470 |
| chr1 | 11079095 | 11079508 |
| chr1 | 11097345 | 11097528 |
| chr1 | 11110566 | 11110718 |
| chr1 | 11145774 | 11145946 |
| chr1 | 11202592 | 11202818 |
| chr1 | 11214248 | 11214403 |
| chr1 | 11253804 | 11253964 |
| chr1 | 11330382 | 11330532 |
| chr1 | 11340411 | 11340561 |
| chr1 | 11348332 | 11348584 |
| chr1 | 11401166 | 11401396 |
| chr1 | 11413917 | 11414342 |
| chr1 | 11414342 | 11414582 |
| chr1 | 11624715 | 11624873 |
| chr1 | 11895086 | 11895326 |
| chr1 | 11895326 | 11895555 |
| chr1 | 11896701 | 11896898 |
| chr1 | 11938224 | 11938415 |
| chr1 | 11953707 | 11953885 |
| chr1 | 12117106 | 12117434 |
| chr1 | 12117434 | 12117651 |
| chr1 | 12198664 | 12198884 |
| chr1 | 12227335 | 12227629 |
| chr1 | 12230652 | 12230894 |
| chr1 | 12231169 | 12231460 |
| chr1 | 12232010 | 12232185 |



|      |          |          |
|------|----------|----------|
| chr1 | 12233134 | 12233761 |
| chr1 | 12238264 | 12238462 |
| chr1 | 12238608 | 12238850 |
| chr1 | 12238894 | 12239205 |
| chr1 | 12273377 | 12273585 |
| chr1 | 12287672 | 12288216 |
| chr1 | 12291793 | 12292143 |
| chr1 | 12295904 | 12296096 |
| chr1 | 12433693 | 12434145 |
| chr1 | 12466340 | 12466505 |
| chr1 | 12564906 | 12565273 |
| chr1 | 12572773 | 12573207 |
| chr1 | 12573207 | 12573719 |
| chr1 | 12578806 | 12579044 |
| chr1 | 12579044 | 12579541 |
| chr1 | 12612177 | 12612445 |
| chr1 | 12620422 | 12620822 |
| chr1 | 12620868 | 12621283 |
| chr1 | 12623144 | 12623718 |
| chr1 | 12633086 | 12633433 |
| chr1 | 12641688 | 12641960 |
| chr1 | 12655892 | 12656284 |
| chr1 | 12657401 | 12658160 |
| chr1 | 12658218 | 12658745 |
| chr1 | 12685504 | 12685714 |
| chr1 | 12692345 | 12692604 |
| chr1 | 12706150 | 12706308 |
| chr1 | 12714700 | 12714973 |
| chr1 | 12715349 | 12715787 |
| chr1 | 12718118 | 12718446 |
| chr1 | 12718446 | 12718744 |
| chr1 | 12719393 | 12719597 |
| chr1 | 12729483 | 12729647 |
| chr1 | 12733013 | 12733198 |
| chr1 | 12734211 | 12734784 |
| chr1 | 12744564 | 12745051 |
| chr1 | 12745061 | 12745359 |
| chr1 | 12759583 | 12759935 |
| chr1 | 12760713 | 12760902 |
| chr1 | 12776790 | 12777303 |
| chr1 | 12777474 | 12777723 |
| chr1 | 12810906 | 12811316 |

|      |          |          |
|------|----------|----------|
| chr1 | 12836873 | 12837045 |
| chr1 | 12838522 | 12838700 |
| chr1 | 12864115 | 12864348 |
| chr1 | 12875551 | 12875757 |
| chr1 | 12877654 | 12878009 |
| chr1 | 12942491 | 12942737 |
| chr1 | 12987140 | 12987290 |
| chr1 | 12990930 | 12991396 |
| chr1 | 12991447 | 12991707 |
| chr1 | 12991707 | 12991906 |
| chr1 | 12991906 | 12992105 |
| chr1 | 12992105 | 12992367 |
| chr1 | 12992367 | 12992628 |
| chr1 | 12992628 | 12992913 |
| chr1 | 12997240 | 12997541 |
| chr1 | 13019654 | 13019838 |
| chr1 | 13052126 | 13052300 |
| chr1 | 13056180 | 13056332 |
| chr1 | 13117848 | 13118015 |
| chr1 | 13119920 | 13120338 |
| chr1 | 13123052 | 13123287 |
| chr1 | 13134365 | 13134664 |
| chr1 | 13143730 | 13144139 |
| chr1 | 13151199 | 13151381 |
| chr1 | 13161356 | 13161922 |
| chr1 | 13162032 | 13162182 |
| chr1 | 13188488 | 13188757 |
| chr1 | 13191876 | 13192097 |
| chr1 | 13231523 | 13231786 |
| chr1 | 13258095 | 13258273 |
| chr1 | 13259592 | 13259805 |
| chr1 | 13301704 | 13301854 |
| chr1 | 13303994 | 13304238 |
| chr1 | 13304865 | 13305242 |
| chr1 | 13305242 | 13305535 |
| chr1 | 13305535 | 13305799 |
| chr1 | 13308960 | 13309240 |
| chr1 | 13312636 | 13312835 |
| chr1 | 13372175 | 13372704 |
| chr1 | 13372704 | 13373002 |
| chr1 | 13373002 | 13373276 |
| chr1 | 13373276 | 13373502 |

|      |          |          |
|------|----------|----------|
| chr1 | 13373502 | 13373679 |
| chr1 | 13373679 | 13373891 |
| chr1 | 13373961 | 13374212 |
| chr1 | 13374338 | 13374671 |
| chr1 | 13386929 | 13387340 |
| chr1 | 13426489 | 13426717 |
| chr1 | 13426964 | 13427120 |
| chr1 | 13454280 | 13454520 |
| chr1 | 13454630 | 13454820 |
| chr1 | 13531572 | 13531803 |
| chr1 | 13546365 | 13546619 |
| chr1 | 13589028 | 13589633 |
| chr1 | 13589633 | 13589957 |
| chr1 | 13589957 | 13590353 |
| chr1 | 13599062 | 13599261 |
| chr1 | 13600383 | 13600701 |
| chr1 | 13608459 | 13608751 |
| chr1 | 13614938 | 13615183 |
| chr1 | 13615687 | 13615877 |
| chr1 | 13615890 | 13616237 |
| chr1 | 13616237 | 13616538 |
| chr1 | 13625696 | 13625906 |
| chr1 | 13639308 | 13639482 |
| chr1 | 13639526 | 13640011 |
| chr1 | 13643099 | 13643502 |
| chr1 | 13659875 | 13660419 |
| chr1 | 13660419 | 13660970 |
| chr1 | 13661065 | 13661242 |
| chr1 | 13677756 | 13678020 |
| chr1 | 13706378 | 13706624 |
| chr1 | 13752479 | 13752931 |
| chr1 | 13789290 | 13789515 |
| chr1 | 13789515 | 13789697 |
| chr1 | 13873876 | 13874322 |
| chr1 | 13879113 | 13879483 |
| chr1 | 13930298 | 13930498 |
| chr1 | 14001477 | 14001773 |
| chr1 | 14002030 | 14002454 |
| chr1 | 14002593 | 14002930 |
| chr1 | 14010777 | 14011088 |
| chr1 | 14011098 | 14011258 |
| chr1 | 14011521 | 14011944 |

|      |          |          |
|------|----------|----------|
| chr1 | 14012011 | 14012237 |
| chr1 | 14012588 | 14012935 |
| chr1 | 14013586 | 14013796 |
| chr1 | 14036938 | 14037217 |
| chr1 | 14037217 | 14037449 |
| chr1 | 14037449 | 14037737 |
| chr1 | 14105776 | 14105928 |
| chr1 | 14124054 | 14124248 |
| chr1 | 14124741 | 14125051 |
| chr1 | 14131774 | 14132118 |
| chr1 | 14148280 | 14148519 |
| chr1 | 14167138 | 14167379 |
| chr1 | 14190517 | 14190687 |
| chr1 | 14200730 | 14200937 |
| chr1 | 14225354 | 14225741 |
| chr1 | 14273608 | 14274346 |
| chr1 | 14274525 | 14274886 |
| chr1 | 14304413 | 14304863 |
| chr1 | 14304863 | 14305142 |
| chr1 | 14305142 | 14305473 |
| chr1 | 14309568 | 14310038 |
| chr1 | 14310038 | 14310412 |
| chr1 | 14355130 | 14355414 |
| chr1 | 14359652 | 14359827 |
| chr1 | 14359907 | 14360442 |
| chr1 | 14362931 | 14363171 |
| chr1 | 14364450 | 14364662 |
| chr1 | 14364665 | 14364945 |
| chr1 | 14460511 | 14460718 |
| chr1 | 14462429 | 14462915 |
| chr1 | 14463333 | 14463520 |
| chr1 | 14467366 | 14467722 |
| chr1 | 14484196 | 14484536 |
| chr1 | 14484536 | 14484969 |
| chr1 | 14484990 | 14485145 |
| chr1 | 14499185 | 14499378 |
| chr1 | 14506526 | 14506863 |
| chr1 | 14513596 | 14513871 |
| chr1 | 14513871 | 14514181 |
| chr1 | 14566498 | 14566724 |
| chr1 | 14596140 | 14596306 |
| chr1 | 14710441 | 14710599 |

|      |          |          |
|------|----------|----------|
| chr1 | 14740091 | 14740335 |
| chr1 | 14746948 | 14747144 |
| chr1 | 14755121 | 14755638 |
| chr1 | 14755638 | 14756006 |
| chr1 | 14772912 | 14773169 |
| chr1 | 14774698 | 14774855 |
| chr1 | 14775271 | 14775630 |
| chr1 | 14781285 | 14781761 |
| chr1 | 14858341 | 14858725 |
| chr1 | 14858903 | 14859240 |
| chr1 | 14918746 | 14919018 |
| chr1 | 14922321 | 14922501 |
| chr1 | 14923724 | 14923927 |
| chr1 | 14924867 | 14925239 |
| chr1 | 14925941 | 14926132 |
| chr1 | 15070065 | 15070321 |
| chr1 | 15070362 | 15070682 |
| chr1 | 15118510 | 15118974 |
| chr1 | 15172901 | 15173053 |
| chr1 | 15179799 | 15180006 |
| chr1 | 15286455 | 15287119 |
| chr1 | 15312968 | 15313151 |
| chr1 | 15691566 | 15691754 |
| chr1 | 15719390 | 15719970 |
| chr1 | 15721093 | 15721266 |
| chr1 | 15725950 | 15726394 |
| chr1 | 15784476 | 15784628 |
| chr1 | 15784769 | 15785173 |
| chr1 | 15785173 | 15785375 |
| chr1 | 15791104 | 15791410 |
| chr1 | 15791422 | 15791919 |
| chr1 | 15791919 | 15792156 |
| chr1 | 15805368 | 15805809 |
| chr1 | 15805809 | 15806167 |
| chr1 | 15806167 | 15806439 |
| chr1 | 15892471 | 15892691 |
| chr1 | 15902510 | 15902660 |
| chr1 | 15936525 | 15937180 |
| chr1 | 15976441 | 15976695 |
| chr1 | 15977098 | 15977272 |
| chr1 | 15993652 | 15993840 |
| chr1 | 16071851 | 16072106 |

|      |          |          |
|------|----------|----------|
| chr1 | 16072113 | 16072263 |
| chr1 | 16072370 | 16072721 |
| chr1 | 16073247 | 16073582 |
| chr1 | 16073582 | 16073859 |
| chr1 | 16073866 | 16074060 |
| chr1 | 16074060 | 16074238 |
| chr1 | 16074238 | 16074431 |
| chr1 | 16074431 | 16074617 |
| chr1 | 16087252 | 16087455 |
| chr1 | 16089791 | 16090209 |
| chr1 | 16093030 | 16093254 |
| chr1 | 16093254 | 16093474 |
| chr1 | 16096678 | 16096864 |
| chr1 | 16104609 | 16105081 |
| chr1 | 16105081 | 16105581 |
| chr1 | 16105581 | 16105960 |
| chr1 | 16109202 | 16109629 |
| chr1 | 16110790 | 16110952 |
| chr1 | 16111774 | 16112009 |
| chr1 | 16113008 | 16113269 |
| chr1 | 16113269 | 16113571 |
| chr1 | 16113656 | 16113904 |
| chr1 | 16121649 | 16121846 |
| chr1 | 16122018 | 16122206 |
| chr1 | 16123569 | 16123748 |
| chr1 | 16130050 | 16130355 |
| chr1 | 16132766 | 16132916 |
| chr1 | 16135436 | 16135826 |
| chr1 | 16135826 | 16136087 |
| chr1 | 16158737 | 16159096 |
| chr1 | 16159248 | 16159415 |
| chr1 | 16159425 | 16159840 |
| chr1 | 16161676 | 16161970 |
| chr1 | 16161970 | 16162207 |
| chr1 | 16171955 | 16172354 |
| chr1 | 16172354 | 16172946 |
| chr1 | 16177616 | 16177938 |
| chr1 | 16179920 | 16180387 |
| chr1 | 16182456 | 16182799 |
| chr1 | 16182799 | 16183097 |
| chr1 | 16199308 | 16199517 |
| chr1 | 16205959 | 16206343 |

|      |          |          |
|------|----------|----------|
| chr1 | 16206517 | 16206833 |
| chr1 | 16206833 | 16207148 |
| chr1 | 16207148 | 16207449 |
| chr1 | 16207449 | 16207770 |
| chr1 | 16207782 | 16207979 |
| chr1 | 16227758 | 16228225 |
| chr1 | 16228225 | 16228512 |
| chr1 | 16228512 | 16229033 |
| chr1 | 16234649 | 16235113 |
| chr1 | 16235113 | 16235559 |
| chr1 | 16240907 | 16241416 |
| chr1 | 16241416 | 16241662 |
| chr1 | 16258250 | 16258808 |
| chr1 | 16268665 | 16269249 |
| chr1 | 16288693 | 16288993 |
| chr1 | 16297752 | 16298013 |
| chr1 | 16304899 | 16305201 |
| chr1 | 16342853 | 16343174 |
| chr1 | 16393634 | 16394020 |
| chr1 | 16433482 | 16433699 |
| chr1 | 16440318 | 16440512 |
| chr1 | 16443517 | 16443697 |
| chr1 | 16518571 | 16519000 |
| chr1 | 16519000 | 16519466 |
| chr1 | 16519640 | 16519883 |
| chr1 | 16519883 | 16520213 |
| chr1 | 16578489 | 16578707 |
| chr1 | 16593146 | 16593318 |
| chr1 | 16618522 | 16618775 |
| chr1 | 16618775 | 16619116 |
| chr1 | 16619116 | 16619621 |
| chr1 | 16629367 | 16629580 |
| chr1 | 16631362 | 16631547 |
| chr1 | 16656460 | 16656819 |
| chr1 | 16656819 | 16657231 |
| chr1 | 16657231 | 16657624 |
| chr1 | 16661331 | 16661607 |
| chr1 | 16662398 | 16662562 |
| chr1 | 16665017 | 16665308 |
| chr1 | 16665308 | 16665693 |
| chr1 | 16683924 | 16684129 |
| chr1 | 16687867 | 16688248 |

|      |          |          |
|------|----------|----------|
| chr1 | 16688248 | 16688570 |
| chr1 | 16688570 | 16688852 |
| chr1 | 16688852 | 16689100 |
| chr1 | 16696722 | 16696920 |
| chr1 | 16750305 | 16750455 |
| chr1 | 16790699 | 16791248 |
| chr1 | 16796533 | 16796767 |
| chr1 | 16798399 | 16798641 |
| chr1 | 16888225 | 16888409 |
| chr1 | 16889812 | 16890110 |
| chr1 | 16904002 | 16904235 |
| chr1 | 17007701 | 17008288 |
| chr1 | 17008379 | 17008651 |
| chr1 | 17008651 | 17008983 |
| chr1 | 17010854 | 17011239 |
| chr1 | 17016017 | 17016230 |
| chr1 | 17016230 | 17016462 |
| chr1 | 17096756 | 17097083 |
| chr1 | 17097126 | 17097347 |
| chr1 | 17097347 | 17097672 |
| chr1 | 17097672 | 17098239 |
| chr1 | 17122916 | 17123078 |
| chr1 | 17123470 | 17123755 |
| chr1 | 17124454 | 17124750 |
| chr1 | 17145482 | 17145823 |
| chr1 | 17163677 | 17163827 |
| chr1 | 17273397 | 17273617 |
| chr1 | 17362568 | 17362718 |
| chr1 | 17375681 | 17376348 |
| chr1 | 17403099 | 17403283 |
| chr1 | 17449424 | 17449574 |
| chr1 | 17488868 | 17489245 |
| chr1 | 17489245 | 17489740 |
| chr1 | 17489740 | 17490116 |
| chr1 | 17490225 | 17490437 |
| chr1 | 17490571 | 17490794 |
| chr1 | 17506714 | 17507106 |
| chr1 | 17523255 | 17523502 |
| chr1 | 17596855 | 17597084 |
| chr1 | 17601358 | 17601508 |
| chr1 | 17605653 | 17605889 |
| chr1 | 17639209 | 17639404 |



|      |          |          |
|------|----------|----------|
| chr1 | 18498608 | 18499034 |
| chr1 | 19176213 | 19176409 |
| chr1 | 19179164 | 19179328 |
| chr1 | 19205741 | 19206016 |
| chr1 | 19206285 | 19206490 |
| chr1 | 19210320 | 19210498 |
| chr1 | 19590290 | 19590620 |
| chr1 | 19660064 | 19660306 |
| chr1 | 19716311 | 19716568 |
| chr1 | 19716791 | 19716953 |
| chr1 | 19744511 | 19744686 |
| chr1 | 19746218 | 19746499 |
| chr1 | 19746607 | 19746830 |
| chr1 | 19749058 | 19749424 |
| chr1 | 19752177 | 19752577 |
| chr1 | 19774435 | 19774925 |
| chr1 | 19794188 | 19794482 |
| chr1 | 19794535 | 19794766 |
| chr1 | 19849951 | 19850363 |
| chr1 | 19850363 | 19850652 |
| chr1 | 19857319 | 19857541 |
| chr1 | 19895988 | 19896143 |
| chr1 | 19906501 | 19906830 |
| chr1 | 19951412 | 19951620 |
| chr1 | 19973412 | 19973669 |
| chr1 | 19974019 | 19974268 |
| chr1 | 20042099 | 20042279 |
| chr1 | 20067538 | 20067688 |
| chr1 | 20069644 | 20070077 |
| chr1 | 20148626 | 20148858 |
| chr1 | 20310982 | 20311271 |
| chr1 | 20311582 | 20311802 |
| chr1 | 20356616 | 20356788 |
| chr1 | 20364536 | 20364740 |
| chr1 | 20414833 | 20415039 |
| chr1 | 20464191 | 20464374 |
| chr1 | 20471310 | 20471638 |
| chr1 | 20544614 | 20544766 |
| chr1 | 20554481 | 20554715 |
| chr1 | 20570790 | 20570944 |
| chr1 | 20571596 | 20571858 |
| chr1 | 20612771 | 20612946 |

|      |          |          |
|------|----------|----------|
| chr1 | 20617638 | 20617901 |
| chr1 | 20617901 | 20618432 |
| chr1 | 20619313 | 20619751 |
| chr1 | 20624455 | 20624646 |
| chr1 | 20634909 | 20635153 |
| chr1 | 20677994 | 20678394 |
| chr1 | 20678702 | 20679246 |
| chr1 | 20736688 | 20736916 |
| chr1 | 20740546 | 20740898 |
| chr1 | 20743926 | 20744124 |
| chr1 | 20744124 | 20744331 |
| chr1 | 20748590 | 20748908 |
| chr1 | 20748908 | 20749194 |
| chr1 | 20752615 | 20752874 |
| chr1 | 20787063 | 20787413 |
| chr1 | 20791495 | 20791812 |
| chr1 | 20819840 | 20820198 |
| chr1 | 20820198 | 20820596 |
| chr1 | 20832574 | 20832733 |
| chr1 | 20846210 | 20846422 |
| chr1 | 20847871 | 20848303 |
| chr1 | 20848303 | 20848562 |
| chr1 | 20848830 | 20849108 |
| chr1 | 20857017 | 20857187 |
| chr1 | 20862827 | 20863024 |
| chr1 | 20863755 | 20864239 |
| chr1 | 20870895 | 20871355 |
| chr1 | 20872278 | 20872520 |
| chr1 | 20872549 | 20872951 |
| chr1 | 20877754 | 20878166 |
| chr1 | 20878985 | 20879251 |
| chr1 | 20879443 | 20879631 |
| chr1 | 20880582 | 20880742 |
| chr1 | 20890378 | 20890678 |
| chr1 | 20890678 | 20890956 |
| chr1 | 20890956 | 20891218 |
| chr1 | 20891218 | 20891593 |
| chr1 | 20893257 | 20893409 |
| chr1 | 20893563 | 20893785 |
| chr1 | 20896470 | 20896928 |
| chr1 | 20923191 | 20923410 |
| chr1 | 20932264 | 20932414 |

|      |          |          |
|------|----------|----------|
| chr1 | 20933559 | 20933801 |
| chr1 | 20939118 | 20939359 |
| chr1 | 20951209 | 20952109 |
| chr1 | 20989444 | 20989951 |
| chr1 | 21002126 | 21003097 |
| chr1 | 21008399 | 21008661 |
| chr1 | 21008883 | 21009251 |
| chr1 | 21010341 | 21010578 |
| chr1 | 21014455 | 21015038 |
| chr1 | 21023950 | 21024165 |
| chr1 | 21040862 | 21041477 |
| chr1 | 21052019 | 21052174 |
| chr1 | 21052265 | 21052435 |
| chr1 | 21052587 | 21052966 |
| chr1 | 21068521 | 21068855 |
| chr1 | 21076351 | 21076513 |
| chr1 | 21078717 | 21079077 |
| chr1 | 21079077 | 21079375 |
| chr1 | 21079375 | 21079572 |
| chr1 | 21079572 | 21079850 |
| chr1 | 21086230 | 21086721 |
| chr1 | 21089630 | 21089842 |
| chr1 | 21090397 | 21090547 |
| chr1 | 21094935 | 21095132 |
| chr1 | 21101290 | 21101555 |
| chr1 | 21114934 | 21115170 |
| chr1 | 21121624 | 21121868 |
| chr1 | 21153089 | 21153276 |
| chr1 | 21161893 | 21162055 |
| chr1 | 21166244 | 21166747 |
| chr1 | 21166864 | 21167057 |
| chr1 | 21210126 | 21210533 |
| chr1 | 21210533 | 21210914 |
| chr1 | 21218289 | 21218688 |
| chr1 | 21218688 | 21219106 |
| chr1 | 21221751 | 21221923 |
| chr1 | 21244427 | 21244587 |
| chr1 | 21271338 | 21271536 |
| chr1 | 21271536 | 21271778 |
| chr1 | 21279216 | 21279606 |
| chr1 | 21344405 | 21344643 |
| chr1 | 21344676 | 21344897 |

|      |          |          |
|------|----------|----------|
| chr1 | 21344897 | 21345134 |
| chr1 | 21458672 | 21458896 |
| chr1 | 21499936 | 21500124 |
| chr1 | 21530929 | 21531081 |
| chr1 | 21552717 | 21552986 |
| chr1 | 21554602 | 21554761 |
| chr1 | 21613743 | 21613920 |
| chr1 | 21613964 | 21614320 |
| chr1 | 21616689 | 21616980 |
| chr1 | 21618740 | 21618990 |
| chr1 | 21622961 | 21623379 |
| chr1 | 21623379 | 21623671 |
| chr1 | 21632684 | 21633043 |
| chr1 | 21634145 | 21634299 |
| chr1 | 21672523 | 21672837 |
| chr1 | 21676368 | 21676559 |
| chr1 | 21676818 | 21677039 |
| chr1 | 21712770 | 21712989 |
| chr1 | 21729222 | 21729429 |
| chr1 | 21817816 | 21818021 |
| chr1 | 21836387 | 21836750 |
| chr1 | 21838605 | 21838867 |
| chr1 | 21960744 | 21960973 |
| chr1 | 21960973 | 21961272 |
| chr1 | 21961272 | 21961665 |
| chr1 | 21961665 | 21962000 |
| chr1 | 21962000 | 21962176 |
| chr1 | 21962176 | 21962342 |
| chr1 | 22268171 | 22268485 |
| chr1 | 22269062 | 22269295 |
| chr1 | 22307877 | 22308180 |
| chr1 | 22327557 | 22327816 |
| chr1 | 22422150 | 22422471 |
| chr1 | 22533285 | 22533648 |
| chr1 | 22805783 | 22806206 |
| chr1 | 22806206 | 22806511 |
| chr1 | 23056679 | 23057095 |
| chr1 | 23061958 | 23062327 |
| chr1 | 23189848 | 23190197 |
| chr1 | 23190213 | 23190661 |
| chr1 | 23190661 | 23191094 |
| chr1 | 23191137 | 23191407 |

|      |          |          |
|------|----------|----------|
| chr1 | 23202543 | 23202841 |
| chr1 | 23202841 | 23203332 |
| chr1 | 23211385 | 23211545 |
| chr1 | 23214296 | 23214795 |
| chr1 | 23214795 | 23215061 |
| chr1 | 23219811 | 23220116 |
| chr1 | 23225068 | 23225222 |
| chr1 | 23228491 | 23228863 |
| chr1 | 23240399 | 23240617 |
| chr1 | 23255847 | 23256495 |
| chr1 | 23256495 | 23257057 |
| chr1 | 23263896 | 23264069 |
| chr1 | 23268141 | 23268398 |
| chr1 | 23268622 | 23268796 |
| chr1 | 23269327 | 23269525 |
| chr1 | 23270932 | 23271233 |
| chr1 | 23271392 | 23271869 |
| chr1 | 23273250 | 23273480 |
| chr1 | 23279731 | 23280184 |
| chr1 | 23286804 | 23287035 |
| chr1 | 23301171 | 23301336 |
| chr1 | 23302173 | 23302323 |
| chr1 | 23306070 | 23306225 |
| chr1 | 23382619 | 23383071 |
| chr1 | 23383071 | 23383319 |
| chr1 | 23383319 | 23383622 |
| chr1 | 23396580 | 23396847 |
| chr1 | 23645050 | 23645558 |
| chr1 | 23761776 | 23762023 |
| chr1 | 23762053 | 23762233 |
| chr1 | 23762233 | 23762447 |
| chr1 | 23762447 | 23762764 |
| chr1 | 23762764 | 23763283 |
| chr1 | 23792829 | 23793068 |
| chr1 | 23827156 | 23827406 |
| chr1 | 23899741 | 23899920 |
| chr1 | 23920382 | 23920577 |
| chr1 | 23921588 | 23921954 |
| chr1 | 23921954 | 23922203 |
| chr1 | 23922203 | 23922591 |
| chr1 | 23944442 | 23944642 |
| chr1 | 23949129 | 23949335 |

|      |          |          |
|------|----------|----------|
| chr1 | 23952715 | 23952870 |
| chr1 | 23958951 | 23959153 |
| chr1 | 23961802 | 23962054 |
| chr1 | 24005169 | 24005350 |
| chr1 | 24005350 | 24005572 |
| chr1 | 24005572 | 24005974 |
| chr1 | 24006703 | 24006899 |
| chr1 | 24047222 | 24047403 |
| chr1 | 24099632 | 24100168 |
| chr1 | 24100168 | 24100388 |
| chr1 | 24100388 | 24100822 |
| chr1 | 24102551 | 24102870 |
| chr1 | 24107367 | 24107737 |
| chr1 | 24107836 | 24108390 |
| chr1 | 24108390 | 24108734 |
| chr1 | 24118938 | 24119133 |
| chr1 | 24134952 | 24135182 |
| chr1 | 24137208 | 24137432 |
| chr1 | 24171551 | 24171777 |
| chr1 | 24249222 | 24249385 |
| chr1 | 24302812 | 24302971 |
| chr1 | 24326278 | 24326510 |
| chr1 | 24331212 | 24331442 |
| chr1 | 24331481 | 24331797 |
| chr1 | 24491824 | 24492018 |
| chr1 | 24553455 | 24553852 |
| chr1 | 24611567 | 24612174 |
| chr1 | 24612174 | 24612732 |
| chr1 | 24612732 | 24613078 |
| chr1 | 24613142 | 24613501 |
| chr1 | 24613501 | 24613755 |
| chr1 | 24613755 | 24614037 |
| chr1 | 24614037 | 24614248 |
| chr1 | 24614248 | 24614444 |
| chr1 | 24614444 | 24614663 |
| chr1 | 24614663 | 24614922 |
| chr1 | 24614922 | 24615170 |
| chr1 | 24615170 | 24615643 |
| chr1 | 24615646 | 24616184 |
| chr1 | 24659816 | 24660131 |
| chr1 | 24677743 | 24677963 |
| chr1 | 24678165 | 24678411 |

|      |          |          |
|------|----------|----------|
| chr1 | 24678411 | 24678571 |
| chr1 | 24678571 | 24679012 |
| chr1 | 24679025 | 24679417 |
| chr1 | 24683995 | 24684324 |
| chr1 | 24686731 | 24686922 |
| chr1 | 24798796 | 24799454 |
| chr1 | 25015018 | 25015250 |
| chr1 | 25017521 | 25018024 |
| chr1 | 25019414 | 25019564 |
| chr1 | 25199468 | 25199662 |
| chr1 | 25228704 | 25228881 |
| chr1 | 26353146 | 26353338 |
| chr1 | 26686062 | 26686318 |
| chr1 | 26686391 | 26686590 |
| chr1 | 26686851 | 26687194 |
| chr1 | 26687194 | 26687445 |
| chr1 | 26687445 | 26687699 |
| chr1 | 26687893 | 26688337 |
| chr1 | 28054039 | 28054338 |
| chr1 | 28328669 | 28328899 |
| chr1 | 28611411 | 28611590 |
| chr1 | 28819009 | 28819248 |
| chr1 | 28831454 | 28831704 |
| chr1 | 28841348 | 28842006 |
| chr1 | 28843666 | 28843985 |
| chr1 | 28893995 | 28894204 |
| chr1 | 29035555 | 29035705 |
| chr1 | 29159993 | 29160259 |
| chr1 | 29285000 | 29285303 |
| chr1 | 29493323 | 29493521 |
| chr1 | 29794832 | 29794992 |
| chr1 | 29818845 | 29819307 |
| chr1 | 30143925 | 30144150 |
| chr1 | 30176972 | 30177145 |
| chr1 | 30184639 | 30184825 |
| chr1 | 30184832 | 30185168 |
| chr1 | 30214668 | 30214829 |
| chr1 | 30590672 | 30590943 |
| chr1 | 30595229 | 30595400 |
| chr1 | 30700482 | 30700696 |
| chr1 | 30718673 | 30718897 |
| chr1 | 30740987 | 30741154 |

|      |          |          |
|------|----------|----------|
| chr1 | 30771912 | 30772062 |
| chr1 | 30789076 | 30789329 |
| chr1 | 30789562 | 30790082 |
| chr1 | 30790237 | 30790606 |
| chr1 | 30792931 | 30793318 |
| chr1 | 30838855 | 30839223 |
| chr1 | 30872827 | 30873081 |
| chr1 | 30873081 | 30873305 |
| chr1 | 30873305 | 30873576 |
| chr1 | 30873576 | 30873851 |
| chr1 | 30873851 | 30874279 |
| chr1 | 30877705 | 30877963 |
| chr1 | 30889697 | 30889866 |
| chr1 | 30891800 | 30892064 |
| chr1 | 30892627 | 30892819 |
| chr1 | 30895357 | 30895751 |
| chr1 | 30898696 | 30898982 |
| chr1 | 30903015 | 30903186 |
| chr1 | 30903550 | 30903849 |
| chr1 | 30903849 | 30904274 |
| chr1 | 30908855 | 30909280 |
| chr1 | 30930703 | 30930918 |
| chr1 | 30930918 | 30931154 |
| chr1 | 30937240 | 30937398 |
| chr1 | 30937417 | 30937996 |
| chr1 | 30938989 | 30939417 |
| chr1 | 30940582 | 30940980 |
| chr1 | 30948988 | 30949222 |
| chr1 | 30949222 | 30949591 |
| chr1 | 30949591 | 30949977 |
| chr1 | 30949977 | 30950390 |
| chr1 | 31019215 | 31019753 |
| chr1 | 31023208 | 31023445 |
| chr1 | 31045388 | 31045668 |
| chr1 | 31045668 | 31045878 |
| chr1 | 31050123 | 31050710 |
| chr1 | 31059035 | 31059217 |
| chr1 | 31094064 | 31094413 |
| chr1 | 31094719 | 31095242 |
| chr1 | 31095564 | 31095782 |
| chr1 | 31095782 | 31096012 |
| chr1 | 31096012 | 31096244 |



|      |          |          |
|------|----------|----------|
| chr1 | 31096244 | 31096461 |
| chr1 | 31101154 | 31101444 |
| chr1 | 31103906 | 31104114 |
| chr1 | 31104648 | 31104914 |
| chr1 | 31105296 | 31105553 |
| chr1 | 31110322 | 31110524 |
| chr1 | 31133905 | 31134062 |
| chr1 | 31143415 | 31143925 |
| chr1 | 31143941 | 31144177 |
| chr1 | 31149891 | 31150132 |
| chr1 | 31153093 | 31153348 |
| chr1 | 31153806 | 31154283 |
| chr1 | 31156892 | 31157276 |
| chr1 | 31164386 | 31165134 |
| chr1 | 31210272 | 31210432 |
| chr1 | 31227722 | 31227976 |
| chr1 | 31227976 | 31228412 |
| chr1 | 31232753 | 31233015 |
| chr1 | 31346030 | 31346206 |
| chr1 | 31615402 | 31615558 |
| chr1 | 31749049 | 31749253 |
| chr1 | 32101170 | 32101562 |
| chr1 | 32104060 | 32104579 |
| chr1 | 32105539 | 32105724 |
| chr1 | 32172354 | 32173207 |
| chr1 | 32412724 | 32412919 |
| chr1 | 33207910 | 33208127 |
| chr1 | 33214424 | 33214597 |
| chr1 | 33244704 | 33245027 |
| chr1 | 33265778 | 33266051 |
| chr1 | 33266161 | 33266347 |
| chr1 | 33463366 | 33463522 |
| chr1 | 33466963 | 33467302 |
| chr1 | 33467458 | 33467847 |
| chr1 | 33467943 | 33468140 |
| chr1 | 33471181 | 33471341 |
| chr1 | 33501354 | 33501562 |
| chr1 | 33522194 | 33522563 |
| chr1 | 33529906 | 33530175 |
| chr1 | 33581558 | 33581819 |
| chr1 | 33583893 | 33584172 |
| chr1 | 33584223 | 33584685 |

|      |          |          |
|------|----------|----------|
| chr1 | 33600804 | 33600994 |
| chr1 | 33601114 | 33601314 |
| chr1 | 33613432 | 33613594 |
| chr1 | 33616936 | 33617137 |
| chr1 | 33631003 | 33631274 |
| chr1 | 33649177 | 33649332 |
| chr1 | 33657430 | 33657910 |
| chr1 | 33657910 | 33658193 |
| chr1 | 33669485 | 33669696 |
| chr1 | 33669696 | 33669933 |
| chr1 | 33669933 | 33670237 |
| chr1 | 33670237 | 33670687 |
| chr1 | 33672630 | 33672804 |
| chr1 | 33684499 | 33684771 |
| chr1 | 33689866 | 33690083 |
| chr1 | 33710581 | 33710982 |
| chr1 | 33717773 | 33717966 |
| chr1 | 33719655 | 33719998 |
| chr1 | 33719998 | 33720251 |
| chr1 | 33720251 | 33720503 |
| chr1 | 33724595 | 33724887 |
| chr1 | 33732873 | 33733460 |
| chr1 | 33739254 | 33739655 |
| chr1 | 33742889 | 33743170 |
| chr1 | 33754298 | 33754461 |
| chr1 | 33756295 | 33756639 |
| chr1 | 33757012 | 33757405 |
| chr1 | 33757408 | 33757678 |
| chr1 | 33757678 | 33758115 |
| chr1 | 33792532 | 33792820 |
| chr1 | 33798460 | 33798643 |
| chr1 | 33799243 | 33799409 |
| chr1 | 33813289 | 33813500 |
| chr1 | 33813500 | 33813807 |
| chr1 | 33813866 | 33814260 |
| chr1 | 33814260 | 33814751 |
| chr1 | 33819878 | 33820124 |
| chr1 | 33870918 | 33871134 |
| chr1 | 33883504 | 33883687 |
| chr1 | 33900136 | 33900527 |
| chr1 | 33906987 | 33907294 |
| chr1 | 33907330 | 33907798 |

|      |          |          |
|------|----------|----------|
| chr1 | 33907798 | 33908386 |
| chr1 | 33908515 | 33908674 |
| chr1 | 33926501 | 33926875 |
| chr1 | 33926947 | 33927239 |
| chr1 | 33927239 | 33927482 |
| chr1 | 33927508 | 33927748 |
| chr1 | 33944054 | 33944277 |
| chr1 | 33945048 | 33945255 |
| chr1 | 33947981 | 33948132 |
| chr1 | 33964666 | 33965074 |
| chr1 | 33966479 | 33966649 |
| chr1 | 33989479 | 33990052 |
| chr1 | 33990052 | 33990338 |
| chr1 | 33996463 | 33996663 |
| chr1 | 33996663 | 33996861 |
| chr1 | 34005543 | 34006205 |
| chr1 | 34006205 | 34006699 |
| chr1 | 34010996 | 34011382 |
| chr1 | 34011382 | 34011739 |
| chr1 | 34011739 | 34012184 |
| chr1 | 34013619 | 34013834 |
| chr1 | 34021057 | 34021264 |
| chr1 | 34021602 | 34021867 |
| chr1 | 34027205 | 34027601 |
| chr1 | 34029911 | 34030073 |
| chr1 | 34030073 | 34030263 |
| chr1 | 34030263 | 34030511 |
| chr1 | 34033148 | 34033382 |
| chr1 | 34034012 | 34034295 |
| chr1 | 34035407 | 34035687 |
| chr1 | 34038672 | 34038909 |
| chr1 | 34041117 | 34041415 |
| chr1 | 34041415 | 34041688 |
| chr1 | 34042293 | 34042642 |
| chr1 | 34043368 | 34043548 |
| chr1 | 34044191 | 34044389 |
| chr1 | 34044517 | 34044819 |
| chr1 | 34044819 | 34045048 |
| chr1 | 34049760 | 34049910 |
| chr1 | 34060417 | 34060637 |
| chr1 | 34060637 | 34060921 |
| chr1 | 34061046 | 34061506 |

|      |          |          |
|------|----------|----------|
| chr1 | 34070492 | 34070798 |
| chr1 | 34071329 | 34071557 |
| chr1 | 34073570 | 34073872 |
| chr1 | 34073872 | 34074277 |
| chr1 | 34074322 | 34074570 |
| chr1 | 34088641 | 34088791 |
| chr1 | 34094322 | 34094661 |
| chr1 | 34094817 | 34095153 |
| chr1 | 34095153 | 34095445 |
| chr1 | 34102484 | 34102648 |
| chr1 | 34102675 | 34103071 |
| chr1 | 34103592 | 34103960 |
| chr1 | 34104517 | 34104757 |
| chr1 | 34104913 | 34105201 |
| chr1 | 34109491 | 34109887 |
| chr1 | 34109887 | 34110272 |
| chr1 | 34110972 | 34111250 |
| chr1 | 34112060 | 34112345 |
| chr1 | 34112635 | 34112915 |
| chr1 | 34120192 | 34120364 |
| chr1 | 34120505 | 34120967 |
| chr1 | 34121188 | 34121552 |
| chr1 | 34122943 | 34123273 |
| chr1 | 34123328 | 34123716 |
| chr1 | 34127807 | 34128083 |
| chr1 | 34132903 | 34133141 |
| chr1 | 34139262 | 34139714 |
| chr1 | 34140092 | 34140504 |
| chr1 | 34144272 | 34144429 |
| chr1 | 34148046 | 34148400 |
| chr1 | 34150697 | 34151104 |
| chr1 | 34158796 | 34158949 |
| chr1 | 34159908 | 34160202 |
| chr1 | 34164381 | 34164531 |
| chr1 | 34164624 | 34164891 |
| chr1 | 34175039 | 34175204 |
| chr1 | 34184327 | 34184621 |
| chr1 | 34185998 | 34186480 |
| chr1 | 34190129 | 34190310 |
| chr1 | 34200153 | 34200316 |
| chr1 | 34202654 | 34202960 |
| chr1 | 34218381 | 34218687 |

|      |          |          |
|------|----------|----------|
| chr1 | 34223999 | 34224177 |
| chr1 | 34230287 | 34230495 |
| chr1 | 34230495 | 34230846 |
| chr1 | 34236211 | 34236770 |
| chr1 | 34237343 | 34237706 |
| chr1 | 34250862 | 34251156 |
| chr1 | 34251156 | 34251507 |
| chr1 | 34251971 | 34252144 |
| chr1 | 34254094 | 34254289 |
| chr1 | 34259146 | 34259313 |
| chr1 | 34259993 | 34260213 |
| chr1 | 34261077 | 34261250 |
| chr1 | 34300738 | 34300997 |
| chr1 | 34310568 | 34310754 |
| chr1 | 34314572 | 34315047 |
| chr1 | 34370764 | 34371037 |
| chr1 | 34399749 | 34400019 |
| chr1 | 34403856 | 34404006 |
| chr1 | 34410021 | 34410171 |
| chr1 | 34411353 | 34411560 |
| chr1 | 34429432 | 34429717 |
| chr1 | 34433263 | 34433413 |
| chr1 | 34434021 | 34434191 |
| chr1 | 34434256 | 34434443 |
| chr1 | 34434664 | 34434949 |
| chr1 | 34434949 | 34435191 |
| chr1 | 34439200 | 34439597 |
| chr1 | 34439597 | 34439950 |
| chr1 | 34439950 | 34440234 |
| chr1 | 34459375 | 34459967 |
| chr1 | 34459967 | 34460376 |
| chr1 | 34462824 | 34463107 |
| chr1 | 34471985 | 34472263 |
| chr1 | 34472566 | 34472802 |
| chr1 | 34472802 | 34473069 |
| chr1 | 34473100 | 34473307 |
| chr1 | 34485935 | 34486182 |
| chr1 | 34503133 | 34503295 |
| chr1 | 34504951 | 34505273 |
| chr1 | 34505273 | 34505623 |
| chr1 | 34511097 | 34511304 |
| chr1 | 34536691 | 34536943 |

|      |          |          |
|------|----------|----------|
| chr1 | 34536943 | 34537180 |
| chr1 | 34537180 | 34537480 |
| chr1 | 34579464 | 34579983 |
| chr1 | 34601766 | 34601917 |
| chr1 | 34602420 | 34602724 |
| chr1 | 34642524 | 34642787 |
| chr1 | 34656428 | 34656795 |
| chr1 | 34677775 | 34678037 |
| chr1 | 34678037 | 34678285 |
| chr1 | 34678285 | 34678460 |
| chr1 | 34678835 | 34679061 |
| chr1 | 34712536 | 34712905 |
| chr1 | 34738506 | 34738658 |
| chr1 | 34738747 | 34739009 |
| chr1 | 34739408 | 34739623 |
| chr1 | 34801548 | 34801838 |
| chr1 | 34801838 | 34802236 |
| chr1 | 34802236 | 34802626 |
| chr1 | 34815887 | 34816184 |
| chr1 | 34819333 | 34819532 |
| chr1 | 34823803 | 34823954 |
| chr1 | 34824172 | 34824545 |
| chr1 | 34824545 | 34825024 |
| chr1 | 34829352 | 34829555 |
| chr1 | 34831010 | 34831281 |
| chr1 | 34840100 | 34840252 |
| chr1 | 34842431 | 34842883 |
| chr1 | 34842883 | 34843180 |
| chr1 | 34843180 | 34843445 |
| chr1 | 34843445 | 34843662 |
| chr1 | 34849826 | 34850096 |
| chr1 | 34850096 | 34850314 |
| chr1 | 34850314 | 34850550 |
| chr1 | 34850550 | 34850821 |
| chr1 | 34851047 | 34851295 |
| chr1 | 34851516 | 34851960 |
| chr1 | 34852525 | 34852754 |
| chr1 | 34858808 | 34858992 |
| chr1 | 34867225 | 34867592 |
| chr1 | 34891668 | 34891889 |
| chr1 | 34896100 | 34896380 |
| chr1 | 34896471 | 34896734 |

|      |          |          |
|------|----------|----------|
| chr1 | 34896973 | 34897223 |
| chr1 | 34979425 | 34979678 |
| chr1 | 35017629 | 35017779 |
| chr1 | 35106753 | 35106983 |
| chr1 | 35149381 | 35149610 |
| chr1 | 35274318 | 35274534 |
| chr1 | 35385513 | 35385732 |
| chr1 | 35509047 | 35509328 |
| chr1 | 35724813 | 35724973 |
| chr1 | 35726697 | 35726908 |
| chr1 | 35759686 | 35760100 |
| chr1 | 35762403 | 35762553 |
| chr1 | 35765743 | 35765939 |
| chr1 | 35780474 | 35780660 |
| chr1 | 35780745 | 35780922 |
| chr1 | 35783407 | 35783667 |
| chr1 | 35813684 | 35813879 |
| chr1 | 35839438 | 35839852 |
| chr1 | 35843684 | 35843968 |
| chr1 | 35843970 | 35844151 |
| chr1 | 35858440 | 35858754 |
| chr1 | 35874868 | 35875253 |
| chr1 | 35875253 | 35875741 |
| chr1 | 35878520 | 35878755 |
| chr1 | 35879553 | 35879915 |
| chr1 | 35879971 | 35880126 |
| chr1 | 35889808 | 35889958 |
| chr1 | 35903972 | 35904516 |
| chr1 | 35913469 | 35914025 |
| chr1 | 35914087 | 35914261 |
| chr1 | 35914261 | 35914442 |
| chr1 | 35930473 | 35930671 |
| chr1 | 35930671 | 35930888 |
| chr1 | 35931019 | 35931583 |
| chr1 | 35940156 | 35940552 |
| chr1 | 35945415 | 35945581 |
| chr1 | 35951816 | 35952086 |
| chr1 | 35952601 | 35953060 |
| chr1 | 35953060 | 35953357 |
| chr1 | 35954095 | 35954386 |
| chr1 | 35961819 | 35962492 |
| chr1 | 35963065 | 35963324 |

|      |          |          |
|------|----------|----------|
| chr1 | 35975795 | 35976195 |
| chr1 | 35976630 | 35976945 |
| chr1 | 35977222 | 35977442 |
| chr1 | 36001864 | 36002047 |
| chr1 | 36012048 | 36012411 |
| chr1 | 36013758 | 36014061 |
| chr1 | 36016759 | 36017156 |
| chr1 | 36017156 | 36017627 |
| chr1 | 36030249 | 36030801 |
| chr1 | 36047681 | 36047893 |
| chr1 | 36059965 | 36060277 |
| chr1 | 36060688 | 36060873 |
| chr1 | 36064966 | 36065193 |
| chr1 | 36068057 | 36068494 |
| chr1 | 36068494 | 36068786 |
| chr1 | 36068897 | 36069240 |
| chr1 | 36069288 | 36069534 |
| chr1 | 36069534 | 36069788 |
| chr1 | 36071284 | 36071608 |
| chr1 | 36073258 | 36073517 |
| chr1 | 36079464 | 36079757 |
| chr1 | 36083299 | 36083507 |
| chr1 | 36083509 | 36083986 |
| chr1 | 36087816 | 36088025 |
| chr1 | 36088344 | 36088587 |
| chr1 | 36089453 | 36089804 |
| chr1 | 36090083 | 36090233 |
| chr1 | 36095428 | 36095749 |
| chr1 | 36095749 | 36096159 |
| chr1 | 36106362 | 36106964 |
| chr1 | 36116204 | 36116534 |
| chr1 | 36116534 | 36117116 |
| chr1 | 36127574 | 36127920 |
| chr1 | 36128462 | 36128646 |
| chr1 | 36129188 | 36129390 |
| chr1 | 36129896 | 36130050 |
| chr1 | 36130237 | 36130731 |
| chr1 | 36134669 | 36134921 |
| chr1 | 36135476 | 36135672 |
| chr1 | 36145153 | 36145347 |
| chr1 | 36149475 | 36149727 |
| chr1 | 36160164 | 36160654 |



|      |          |          |
|------|----------|----------|
| chr1 | 36162263 | 36162437 |
| chr1 | 36162723 | 36163101 |
| chr1 | 36198936 | 36199206 |
| chr1 | 36200418 | 36200667 |
| chr1 | 36235055 | 36235477 |
| chr1 | 36235851 | 36236232 |
| chr1 | 36243798 | 36244553 |
| chr1 | 36252891 | 36253149 |
| chr1 | 36254644 | 36255016 |
| chr1 | 36255016 | 36255304 |
| chr1 | 36255304 | 36255521 |
| chr1 | 36263979 | 36264155 |
| chr1 | 36264209 | 36264539 |
| chr1 | 36264785 | 36265020 |
| chr1 | 36265085 | 36265378 |
| chr1 | 36265378 | 36265724 |
| chr1 | 36266384 | 36266696 |
| chr1 | 36272502 | 36272979 |
| chr1 | 36273031 | 36273372 |
| chr1 | 36273372 | 36273685 |
| chr1 | 36274364 | 36274926 |
| chr1 | 36275119 | 36275290 |
| chr1 | 36277358 | 36277508 |
| chr1 | 36279215 | 36279522 |
| chr1 | 36285889 | 36286043 |
| chr1 | 36287686 | 36287979 |
| chr1 | 36288960 | 36289206 |
| chr1 | 36295328 | 36295600 |
| chr1 | 36296311 | 36296822 |
| chr1 | 36296822 | 36297030 |
| chr1 | 36303352 | 36303893 |
| chr1 | 36307513 | 36307912 |
| chr1 | 36307912 | 36308220 |
| chr1 | 36308541 | 36308911 |
| chr1 | 36309016 | 36309468 |
| chr1 | 36309468 | 36309809 |
| chr1 | 36315001 | 36315296 |
| chr1 | 36324108 | 36324365 |
| chr1 | 36325332 | 36325597 |
| chr1 | 36325718 | 36326146 |
| chr1 | 36326146 | 36326511 |
| chr1 | 36368202 | 36368367 |

|      |          |          |
|------|----------|----------|
| chr1 | 36368460 | 36368729 |
| chr1 | 36368729 | 36369019 |
| chr1 | 36369019 | 36369304 |
| chr1 | 36369304 | 36369560 |
| chr1 | 36372475 | 36372770 |
| chr1 | 36387050 | 36387272 |
| chr1 | 36396290 | 36396596 |
| chr1 | 36432780 | 36433073 |
| chr1 | 36433073 | 36433400 |
| chr1 | 36433421 | 36433603 |
| chr1 | 36436793 | 36437127 |
| chr1 | 36444761 | 36445123 |
| chr1 | 36445123 | 36445531 |
| chr1 | 36445610 | 36445822 |
| chr1 | 36457176 | 36457649 |
| chr1 | 36457649 | 36458263 |
| chr1 | 36470056 | 36470441 |
| chr1 | 36471217 | 36471867 |
| chr1 | 36471867 | 36472231 |
| chr1 | 36477295 | 36477447 |
| chr1 | 36480578 | 36480820 |
| chr1 | 36484757 | 36484927 |
| chr1 | 36485148 | 36485534 |
| chr1 | 36490463 | 36490860 |
| chr1 | 36492290 | 36492867 |
| chr1 | 36497418 | 36497654 |
| chr1 | 36497743 | 36498403 |
| chr1 | 36498563 | 36498717 |
| chr1 | 36501361 | 36501530 |
| chr1 | 36511408 | 36512023 |
| chr1 | 36512023 | 36512355 |
| chr1 | 36512355 | 36512607 |
| chr1 | 36512607 | 36512816 |
| chr1 | 36512816 | 36513058 |
| chr1 | 36517895 | 36518189 |
| chr1 | 36518908 | 36519097 |
| chr1 | 36534468 | 36535159 |
| chr1 | 36535755 | 36535907 |
| chr1 | 36536023 | 36536331 |
| chr1 | 36546718 | 36546877 |
| chr1 | 36546882 | 36547702 |
| chr1 | 36550586 | 36550797 |

|      |          |          |
|------|----------|----------|
| chr1 | 36556511 | 36556873 |
| chr1 | 36556873 | 36557122 |
| chr1 | 36557122 | 36557395 |
| chr1 | 36557395 | 36557697 |
| chr1 | 36557697 | 36558072 |
| chr1 | 36558072 | 36558368 |
| chr1 | 36558368 | 36558582 |
| chr1 | 36569015 | 36569175 |
| chr1 | 36570428 | 36570807 |
| chr1 | 36571674 | 36571889 |
| chr1 | 36574387 | 36574577 |
| chr1 | 36580109 | 36580368 |
| chr1 | 36580433 | 36580665 |
| chr1 | 36583408 | 36583770 |
| chr1 | 36583770 | 36584067 |
| chr1 | 36596105 | 36596441 |
| chr1 | 36603367 | 36603649 |
| chr1 | 36608306 | 36608504 |
| chr1 | 36610344 | 36610601 |
| chr1 | 36610601 | 36610891 |
| chr1 | 36613716 | 36613866 |
| chr1 | 36625557 | 36625867 |
| chr1 | 36634785 | 36635033 |
| chr1 | 36635033 | 36635413 |
| chr1 | 36659111 | 36659263 |
| chr1 | 36683961 | 36684113 |
| chr1 | 36684134 | 36684764 |
| chr1 | 36691232 | 36691634 |
| chr1 | 36691634 | 36691890 |
| chr1 | 36708700 | 36709009 |
| chr1 | 36709009 | 36709316 |
| chr1 | 36709316 | 36709563 |
| chr1 | 36709563 | 36709839 |
| chr1 | 36709839 | 36710257 |
| chr1 | 36715307 | 36715629 |
| chr1 | 36722519 | 36722743 |
| chr1 | 36737368 | 36737630 |
| chr1 | 36744445 | 36744961 |
| chr1 | 36746553 | 36746762 |
| chr1 | 36766916 | 36767145 |
| chr1 | 36772310 | 36772466 |
| chr1 | 36772612 | 36772840 |

|      |          |          |
|------|----------|----------|
| chr1 | 36784509 | 36784669 |
| chr1 | 36784685 | 36785155 |
| chr1 | 36785217 | 36785500 |
| chr1 | 36798146 | 36798504 |
| chr1 | 36802466 | 36802799 |
| chr1 | 36822013 | 36822224 |
| chr1 | 36861588 | 36861780 |
| chr1 | 36864532 | 36864820 |
| chr1 | 36864820 | 36865170 |
| chr1 | 36865170 | 36865473 |
| chr1 | 36871307 | 36871568 |
| chr1 | 36874446 | 36874760 |
| chr1 | 36874760 | 36875002 |
| chr1 | 36875002 | 36875267 |
| chr1 | 36875293 | 36875443 |
| chr1 | 36879163 | 36879474 |
| chr1 | 36879743 | 36879920 |
| chr1 | 36889715 | 36889914 |
| chr1 | 36904615 | 36904829 |
| chr1 | 36920179 | 36920417 |
| chr1 | 36920417 | 36920684 |
| chr1 | 36920684 | 36920977 |
| chr1 | 36923055 | 36923413 |
| chr1 | 36923413 | 36923758 |
| chr1 | 36930148 | 36930302 |
| chr1 | 36937386 | 36937564 |
| chr1 | 36937738 | 36937963 |
| chr1 | 36939003 | 36939426 |
| chr1 | 36939426 | 36939805 |
| chr1 | 36939805 | 36940244 |
| chr1 | 36942072 | 36942227 |
| chr1 | 36944018 | 36944217 |
| chr1 | 36949657 | 36949875 |
| chr1 | 36965281 | 36965514 |
| chr1 | 36965514 | 36965838 |
| chr1 | 36965838 | 36966243 |
| chr1 | 36971009 | 36971239 |
| chr1 | 37029141 | 37029582 |
| chr1 | 37041134 | 37041453 |
| chr1 | 37044369 | 37044538 |
| chr1 | 37077364 | 37077628 |
| chr1 | 37216118 | 37216415 |

|      |          |          |
|------|----------|----------|
| chr1 | 37216494 | 37216714 |
| chr1 | 37218468 | 37218683 |
| chr1 | 37231325 | 37231499 |
| chr1 | 37232781 | 37233163 |
| chr1 | 37237462 | 37237786 |
| chr1 | 37248419 | 37248867 |
| chr1 | 37249529 | 37249886 |
| chr1 | 37250759 | 37250909 |
| chr1 | 37253283 | 37253575 |
| chr1 | 37272367 | 37272517 |
| chr1 | 37272539 | 37272823 |
| chr1 | 37288317 | 37288528 |
| chr1 | 37288732 | 37288883 |
| chr1 | 37288885 | 37289280 |
| chr1 | 37299548 | 37299823 |
| chr1 | 37299823 | 37300037 |
| chr1 | 37300037 | 37300494 |
| chr1 | 37329284 | 37329434 |
| chr1 | 37351403 | 37351596 |
| chr1 | 37401749 | 37402083 |
| chr1 | 37404986 | 37405455 |
| chr1 | 37419432 | 37419786 |
| chr1 | 37429525 | 37429876 |
| chr1 | 37429876 | 37430492 |
| chr1 | 37430521 | 37430771 |
| chr1 | 37466687 | 37466844 |
| chr1 | 37475423 | 37475636 |
| chr1 | 37519128 | 37519324 |
| chr1 | 37524076 | 37524465 |
| chr1 | 37525109 | 37525327 |
| chr1 | 37528359 | 37528584 |
| chr1 | 37540503 | 37540932 |
| chr1 | 37540932 | 37541550 |
| chr1 | 37559780 | 37560037 |
| chr1 | 37560414 | 37560857 |
| chr1 | 37566804 | 37567096 |
| chr1 | 37567386 | 37567630 |
| chr1 | 37583827 | 37584147 |
| chr1 | 37585646 | 37586100 |
| chr1 | 37586100 | 37586496 |
| chr1 | 37595100 | 37595271 |
| chr1 | 37595439 | 37595971 |

|      |          |          |
|------|----------|----------|
| chr1 | 37603192 | 37603773 |
| chr1 | 37609650 | 37609833 |
| chr1 | 37616208 | 37616459 |
| chr1 | 37616463 | 37616786 |
| chr1 | 37628955 | 37629136 |
| chr1 | 37630812 | 37631304 |
| chr1 | 37631304 | 37632009 |
| chr1 | 37632598 | 37632840 |
| chr1 | 37639140 | 37639489 |
| chr1 | 37646841 | 37647003 |
| chr1 | 37665602 | 37665904 |
| chr1 | 37666533 | 37667016 |
| chr1 | 37678175 | 37678462 |
| chr1 | 37678462 | 37678734 |
| chr1 | 37684782 | 37685016 |
| chr1 | 37687141 | 37687462 |
| chr1 | 37690756 | 37690958 |
| chr1 | 37691301 | 37691485 |
| chr1 | 37694546 | 37694747 |
| chr1 | 37696405 | 37696830 |
| chr1 | 37696830 | 37697333 |
| chr1 | 37706520 | 37706747 |
| chr1 | 37709764 | 37710030 |
| chr1 | 37711519 | 37712003 |
| chr1 | 37712018 | 37712297 |
| chr1 | 37712353 | 37712812 |
| chr1 | 37719415 | 37719743 |
| chr1 | 37719743 | 37720049 |
| chr1 | 37720049 | 37720508 |
| chr1 | 37723344 | 37723494 |
| chr1 | 37793627 | 37793795 |
| chr1 | 37864469 | 37865137 |
| chr1 | 37865137 | 37865603 |
| chr1 | 37871612 | 37872031 |
| chr1 | 37872061 | 37872300 |
| chr1 | 37872300 | 37872536 |
| chr1 | 37872768 | 37872966 |
| chr1 | 37873465 | 37873660 |
| chr1 | 37884453 | 37884796 |
| chr1 | 37889580 | 37889864 |
| chr1 | 37890045 | 37890442 |
| chr1 | 37890442 | 37890809 |

|      |          |          |
|------|----------|----------|
| chr1 | 37891504 | 37891708 |
| chr1 | 37903242 | 37903560 |
| chr1 | 37913486 | 37913655 |
| chr1 | 37931709 | 37932217 |
| chr1 | 37954370 | 37954713 |
| chr1 | 37954713 | 37955225 |
| chr1 | 37968891 | 37969220 |
| chr1 | 37971247 | 37971605 |
| chr1 | 37971605 | 37971927 |
| chr1 | 37985838 | 37986095 |
| chr1 | 37996833 | 37997139 |
| chr1 | 37997139 | 37997512 |
| chr1 | 37997764 | 37998324 |
| chr1 | 37998324 | 37998683 |
| chr1 | 38012283 | 38012452 |
| chr1 | 38012600 | 38012842 |
| chr1 | 38012842 | 38013080 |
| chr1 | 38025472 | 38025660 |
| chr1 | 38038776 | 38039333 |
| chr1 | 38049520 | 38049847 |
| chr1 | 38052198 | 38052559 |
| chr1 | 38081414 | 38081648 |
| chr1 | 38108802 | 38109107 |
| chr1 | 38109794 | 38110168 |
| chr1 | 38110175 | 38110339 |
| chr1 | 38114133 | 38114285 |
| chr1 | 38129141 | 38129458 |
| chr1 | 38129505 | 38130316 |
| chr1 | 38141052 | 38141202 |
| chr1 | 38165722 | 38165920 |
| chr1 | 38185590 | 38185828 |
| chr1 | 38194498 | 38194668 |
| chr1 | 38212416 | 38212707 |
| chr1 | 38286669 | 38286822 |
| chr1 | 38292005 | 38292246 |
| chr1 | 38292891 | 38293179 |
| chr1 | 38424464 | 38424865 |
| chr1 | 38430413 | 38430609 |
| chr1 | 38437733 | 38438103 |
| chr1 | 38470185 | 38470422 |
| chr1 | 38547602 | 38548058 |
| chr1 | 38548709 | 38548948 |

|      |          |          |
|------|----------|----------|
| chr1 | 38548948 | 38549159 |
| chr1 | 38626559 | 38626724 |
| chr1 | 38626907 | 38627294 |
| chr1 | 38627294 | 38627677 |
| chr1 | 38647372 | 38647793 |
| chr1 | 38653297 | 38653491 |
| chr1 | 38705901 | 38706117 |
| chr1 | 38787519 | 38787776 |
| chr1 | 38835699 | 38835849 |
| chr1 | 38897911 | 38898193 |
| chr1 | 38951776 | 38951969 |
| chr1 | 38956868 | 38957159 |
| chr1 | 38971665 | 38971970 |
| chr1 | 38972936 | 38973276 |
| chr1 | 38973276 | 38973593 |
| chr1 | 38973599 | 38973789 |
| chr1 | 38979922 | 38980362 |
| chr1 | 38980852 | 38981032 |
| chr1 | 38987119 | 38987512 |
| chr1 | 38987512 | 38987834 |
| chr1 | 38987834 | 38988153 |
| chr1 | 38988341 | 38988501 |
| chr1 | 38991460 | 38991611 |
| chr1 | 39001187 | 39001453 |
| chr1 | 39010727 | 39011005 |
| chr1 | 39056390 | 39056603 |
| chr1 | 39081321 | 39081531 |
| chr1 | 39105605 | 39105807 |
| chr1 | 39189489 | 39189689 |
| chr1 | 39196756 | 39197118 |
| chr1 | 39207017 | 39207194 |
| chr1 | 39253880 | 39254056 |
| chr1 | 39256108 | 39256434 |
| chr1 | 39256484 | 39256886 |
| chr1 | 39256900 | 39257103 |
| chr1 | 39261092 | 39261271 |
| chr1 | 39281806 | 39282236 |
| chr1 | 39340722 | 39341055 |
| chr1 | 39367609 | 39367954 |
| chr1 | 39367954 | 39368213 |
| chr1 | 39368213 | 39368443 |
| chr1 | 39373552 | 39373754 |



|      |          |          |
|------|----------|----------|
| chr1 | 39374444 | 39374778 |
| chr1 | 39376610 | 39376884 |
| chr1 | 39376971 | 39377133 |
| chr1 | 39392242 | 39392500 |
| chr1 | 39394344 | 39394506 |
| chr1 | 39398883 | 39399203 |
| chr1 | 39399203 | 39399812 |
| chr1 | 39399842 | 39400028 |
| chr1 | 39456243 | 39456630 |
| chr1 | 39456630 | 39456952 |
| chr1 | 39457277 | 39457468 |
| chr1 | 39478018 | 39478302 |
| chr1 | 39478302 | 39478614 |
| chr1 | 39478614 | 39479102 |
| chr1 | 39480568 | 39480764 |
| chr1 | 39499459 | 39499786 |
| chr1 | 39499786 | 39500033 |
| chr1 | 39511235 | 39511385 |
| chr1 | 39522601 | 39522879 |
| chr1 | 39525945 | 39526095 |
| chr1 | 39526509 | 39526670 |
| chr1 | 39527512 | 39527766 |
| chr1 | 39530345 | 39530582 |
| chr1 | 39535437 | 39535892 |
| chr1 | 39535892 | 39536392 |
| chr1 | 39545554 | 39546025 |
| chr1 | 39548619 | 39548906 |
| chr1 | 39548906 | 39549163 |
| chr1 | 39556100 | 39556414 |
| chr1 | 39563237 | 39563486 |
| chr1 | 39568868 | 39569141 |
| chr1 | 39576475 | 39576841 |
| chr1 | 39576841 | 39577137 |
| chr1 | 39577137 | 39577422 |
| chr1 | 39577422 | 39577674 |
| chr1 | 39602628 | 39602801 |
| chr1 | 39636221 | 39636600 |
| chr1 | 39636602 | 39637024 |
| chr1 | 39650465 | 39651105 |
| chr1 | 39656810 | 39657282 |
| chr1 | 39657282 | 39657528 |
| chr1 | 39667109 | 39667406 |

|      |          |          |
|------|----------|----------|
| chr1 | 39667406 | 39667684 |
| chr1 | 39670217 | 39670616 |
| chr1 | 39670616 | 39670887 |
| chr1 | 39678959 | 39679256 |
| chr1 | 39680629 | 39680881 |
| chr1 | 39685888 | 39686157 |
| chr1 | 39695264 | 39695543 |
| chr1 | 39695543 | 39695808 |
| chr1 | 39752749 | 39752958 |
| chr1 | 39755700 | 39755947 |
| chr1 | 39755947 | 39756242 |
| chr1 | 39756270 | 39756446 |
| chr1 | 39759145 | 39759490 |
| chr1 | 39759490 | 39759820 |
| chr1 | 39759887 | 39760059 |
| chr1 | 39761094 | 39761414 |
| chr1 | 39761414 | 39761715 |
| chr1 | 39761754 | 39761921 |
| chr1 | 39762087 | 39762304 |
| chr1 | 39796203 | 39796403 |
| chr1 | 39810517 | 39810916 |
| chr1 | 39845159 | 39845343 |
| chr1 | 39867577 | 39867729 |
| chr1 | 39889395 | 39889782 |
| chr1 | 39895055 | 39895734 |
| chr1 | 39900255 | 39900557 |
| chr1 | 39900557 | 39901082 |
| chr1 | 39901082 | 39901494 |
| chr1 | 39901494 | 39901725 |
| chr1 | 39901922 | 39902081 |
| chr1 | 39902748 | 39902993 |
| chr1 | 39910146 | 39910363 |
| chr1 | 39911396 | 39911822 |
| chr1 | 39913304 | 39913656 |
| chr1 | 39915616 | 39915915 |
| chr1 | 39923465 | 39923730 |
| chr1 | 39923821 | 39924001 |
| chr1 | 39925077 | 39925493 |
| chr1 | 39926268 | 39926434 |
| chr1 | 39931479 | 39931656 |
| chr1 | 39931713 | 39931911 |
| chr1 | 39931971 | 39932342 |

|      |          |          |
|------|----------|----------|
| chr1 | 39932342 | 39932709 |
| chr1 | 39935607 | 39935799 |
| chr1 | 39935961 | 39936434 |
| chr1 | 39936434 | 39936834 |
| chr1 | 39940935 | 39941261 |
| chr1 | 39941261 | 39941603 |
| chr1 | 39941603 | 39942116 |
| chr1 | 39949170 | 39949490 |
| chr1 | 39949490 | 39949697 |
| chr1 | 39950115 | 39950469 |
| chr1 | 39956499 | 39957104 |
| chr1 | 39977022 | 39977182 |
| chr1 | 39986207 | 39986505 |
| chr1 | 40000996 | 40001233 |
| chr1 | 40002172 | 40002330 |
| chr1 | 40006142 | 40006387 |
| chr1 | 40006387 | 40006597 |
| chr1 | 40015081 | 40015380 |
| chr1 | 40028238 | 40028450 |
| chr1 | 40028450 | 40028655 |
| chr1 | 40031747 | 40032034 |
| chr1 | 40033408 | 40033589 |
| chr1 | 40033613 | 40034091 |
| chr1 | 40051257 | 40051418 |
| chr1 | 40054009 | 40054165 |
| chr1 | 40060777 | 40060998 |
| chr1 | 40063097 | 40063262 |
| chr1 | 40085613 | 40085772 |
| chr1 | 40085845 | 40085997 |
| chr1 | 40088714 | 40089106 |
| chr1 | 40092594 | 40092813 |
| chr1 | 40107132 | 40107497 |
| chr1 | 40115433 | 40115586 |
| chr1 | 40116477 | 40116789 |
| chr1 | 40139752 | 40140256 |
| chr1 | 40140256 | 40140429 |
| chr1 | 40155541 | 40155718 |
| chr1 | 40167112 | 40167348 |
| chr1 | 40167553 | 40167879 |
| chr1 | 40171836 | 40172074 |
| chr1 | 40172074 | 40172350 |
| chr1 | 40174113 | 40174581 |

|      |          |          |
|------|----------|----------|
| chr1 | 40183443 | 40183623 |
| chr1 | 40183623 | 40183787 |
| chr1 | 40187878 | 40188080 |
| chr1 | 40188122 | 40188443 |
| chr1 | 40190176 | 40190326 |
| chr1 | 40194151 | 40194815 |
| chr1 | 40217189 | 40217342 |
| chr1 | 40219298 | 40219504 |
| chr1 | 40224490 | 40224892 |
| chr1 | 40224892 | 40225403 |
| chr1 | 40233703 | 40233937 |
| chr1 | 40235616 | 40235831 |
| chr1 | 40251999 | 40252149 |
| chr1 | 40253986 | 40254289 |
| chr1 | 40266404 | 40266699 |
| chr1 | 40266699 | 40266917 |
| chr1 | 40266917 | 40267372 |
| chr1 | 40272256 | 40272640 |
| chr1 | 40275209 | 40275671 |
| chr1 | 40279111 | 40279696 |
| chr1 | 40284497 | 40284670 |
| chr1 | 40284670 | 40284978 |
| chr1 | 40294757 | 40295205 |
| chr1 | 40295205 | 40295470 |
| chr1 | 40318048 | 40318226 |
| chr1 | 40318777 | 40319108 |
| chr1 | 40339431 | 40339626 |
| chr1 | 40358579 | 40359233 |
| chr1 | 40378917 | 40379077 |
| chr1 | 40380143 | 40380494 |
| chr1 | 40385017 | 40385524 |
| chr1 | 40392919 | 40393591 |
| chr1 | 40393591 | 40393905 |
| chr1 | 40400658 | 40400949 |
| chr1 | 40400949 | 40401323 |
| chr1 | 40412484 | 40412767 |
| chr1 | 40413129 | 40413406 |
| chr1 | 40417045 | 40417557 |
| chr1 | 40420033 | 40420321 |
| chr1 | 40435924 | 40436348 |
| chr1 | 40436348 | 40436653 |
| chr1 | 40437111 | 40437393 |

|      |          |          |
|------|----------|----------|
| chr1 | 40444679 | 40444998 |
| chr1 | 40444998 | 40445266 |
| chr1 | 40465451 | 40465747 |
| chr1 | 40465747 | 40465994 |
| chr1 | 40466171 | 40466326 |
| chr1 | 40467288 | 40467775 |
| chr1 | 40468891 | 40469343 |
| chr1 | 40501682 | 40501838 |
| chr1 | 40512911 | 40513080 |
| chr1 | 40515234 | 40515508 |
| chr1 | 40516075 | 40516270 |
| chr1 | 40516432 | 40516709 |
| chr1 | 40529353 | 40529634 |
| chr1 | 40529634 | 40529928 |
| chr1 | 40530888 | 40531092 |
| chr1 | 40534334 | 40534595 |
| chr1 | 40542223 | 40543136 |
| chr1 | 40551451 | 40551601 |
| chr1 | 40579835 | 40580194 |
| chr1 | 40580372 | 40580558 |
| chr1 | 40586759 | 40587359 |
| chr1 | 40592181 | 40592567 |
| chr1 | 40592567 | 40592782 |
| chr1 | 40594038 | 40594470 |
| chr1 | 40614269 | 40614972 |
| chr1 | 40616940 | 40617236 |
| chr1 | 40617236 | 40617491 |
| chr1 | 40617528 | 40617786 |
| chr1 | 40619782 | 40620200 |
| chr1 | 40631391 | 40631615 |
| chr1 | 40632687 | 40633034 |
| chr1 | 40633480 | 40633738 |
| chr1 | 40658032 | 40658349 |
| chr1 | 40681055 | 40681465 |
| chr1 | 40681465 | 40681906 |
| chr1 | 40681906 | 40682335 |
| chr1 | 40682783 | 40683423 |
| chr1 | 40714904 | 40715054 |
| chr1 | 40724690 | 40724969 |
| chr1 | 40768715 | 40768866 |
| chr1 | 40773232 | 40773756 |
| chr1 | 40775640 | 40775941 |

|      |          |          |
|------|----------|----------|
| chr1 | 40779953 | 40780221 |
| chr1 | 40789926 | 40790132 |
| chr1 | 40790218 | 40790589 |
| chr1 | 40790589 | 40790826 |
| chr1 | 40790826 | 40791045 |
| chr1 | 40797365 | 40797667 |
| chr1 | 40802847 | 40803070 |
| chr1 | 40808732 | 40808925 |
| chr1 | 40832749 | 40833162 |
| chr1 | 40835506 | 40835761 |
| chr1 | 40840268 | 40840510 |
| chr1 | 40840510 | 40840949 |
| chr1 | 40841018 | 40841344 |
| chr1 | 40842497 | 40842729 |
| chr1 | 40844733 | 40844889 |
| chr1 | 40847003 | 40847199 |
| chr1 | 40847199 | 40847396 |
| chr1 | 40847553 | 40847978 |
| chr1 | 40848068 | 40848219 |
| chr1 | 40851381 | 40851544 |
| chr1 | 40857808 | 40858010 |
| chr1 | 40865049 | 40865367 |
| chr1 | 40866474 | 40866733 |
| chr1 | 40874978 | 40875584 |
| chr1 | 40878199 | 40878386 |
| chr1 | 40887704 | 40887915 |
| chr1 | 40907093 | 40907267 |
| chr1 | 40945775 | 40945964 |
| chr1 | 40968200 | 40968402 |
| chr1 | 41390178 | 41390401 |
| chr1 | 42021205 | 42021454 |
| chr1 | 42169624 | 42169774 |
| chr1 | 42200703 | 42200857 |
| chr1 | 42591790 | 42592330 |
| chr1 | 42668467 | 42668623 |
| chr1 | 42695581 | 42695826 |
| chr1 | 42695826 | 42696072 |
| chr1 | 42696546 | 42696766 |
| chr1 | 42713272 | 42713450 |
| chr1 | 42714673 | 42714857 |
| chr1 | 42715213 | 42715450 |
| chr1 | 42769152 | 42769338 |

|      |          |          |
|------|----------|----------|
| chr1 | 42787470 | 42787626 |
| chr1 | 42850794 | 42851016 |
| chr1 | 42851016 | 42851321 |
| chr1 | 42851321 | 42851774 |
| chr1 | 42882319 | 42882622 |
| chr1 | 42915090 | 42915351 |
| chr1 | 42917935 | 42918262 |
| chr1 | 42952766 | 42953017 |
| chr1 | 42953134 | 42953452 |
| chr1 | 43051791 | 43052410 |
| chr1 | 43065967 | 43066240 |
| chr1 | 43070807 | 43071029 |
| chr1 | 43091597 | 43091753 |
| chr1 | 43091772 | 43092083 |
| chr1 | 43092083 | 43092397 |
| chr1 | 43092397 | 43092619 |
| chr1 | 43092619 | 43092827 |
| chr1 | 43092827 | 43093079 |
| chr1 | 43098093 | 43098295 |
| chr1 | 43098306 | 43098775 |
| chr1 | 43098775 | 43099165 |
| chr1 | 43110634 | 43110865 |
| chr1 | 43112963 | 43113204 |
| chr1 | 43119033 | 43119279 |
| chr1 | 43127767 | 43128219 |
| chr1 | 43128219 | 43128732 |
| chr1 | 43139653 | 43139952 |
| chr1 | 43141475 | 43141782 |
| chr1 | 43141782 | 43142106 |
| chr1 | 43144433 | 43144718 |
| chr1 | 43147524 | 43147820 |
| chr1 | 43152261 | 43152630 |
| chr1 | 43152630 | 43152965 |
| chr1 | 43152965 | 43153231 |
| chr1 | 43163098 | 43163456 |
| chr1 | 43163529 | 43164297 |
| chr1 | 43168035 | 43168325 |
| chr1 | 43168325 | 43168636 |
| chr1 | 43168636 | 43169209 |
| chr1 | 43169649 | 43170030 |
| chr1 | 43174851 | 43175197 |
| chr1 | 43207789 | 43207939 |

|      |          |          |
|------|----------|----------|
| chr1 | 43218071 | 43218302 |
| chr1 | 43218512 | 43218715 |
| chr1 | 43223156 | 43223516 |
| chr1 | 43224168 | 43224603 |
| chr1 | 43225079 | 43225257 |
| chr1 | 43225864 | 43226017 |
| chr1 | 43237970 | 43238199 |
| chr1 | 43253081 | 43253235 |
| chr1 | 43256118 | 43256305 |
| chr1 | 43260453 | 43260876 |
| chr1 | 43264446 | 43264705 |
| chr1 | 43264705 | 43264920 |
| chr1 | 43265681 | 43266209 |
| chr1 | 43269493 | 43269731 |
| chr1 | 43269741 | 43270021 |
| chr1 | 43281067 | 43281305 |
| chr1 | 43284763 | 43284935 |
| chr1 | 43299529 | 43299796 |
| chr1 | 43302731 | 43303115 |
| chr1 | 43305462 | 43305630 |
| chr1 | 43306093 | 43306307 |
| chr1 | 43338654 | 43338888 |
| chr1 | 43361123 | 43361402 |
| chr1 | 43361402 | 43361922 |
| chr1 | 43367592 | 43367874 |
| chr1 | 43385065 | 43385537 |
| chr1 | 43394078 | 43394333 |
| chr1 | 43395804 | 43396213 |
| chr1 | 43396250 | 43396588 |
| chr1 | 43396588 | 43396849 |
| chr1 | 43411916 | 43412142 |
| chr1 | 43412929 | 43413206 |
| chr1 | 43413373 | 43413740 |
| chr1 | 43413766 | 43414155 |
| chr1 | 43414247 | 43414497 |
| chr1 | 43423426 | 43423692 |
| chr1 | 43444143 | 43444429 |
| chr1 | 43444603 | 43444889 |
| chr1 | 43445360 | 43445566 |
| chr1 | 43445575 | 43445847 |
| chr1 | 43445847 | 43446094 |
| chr1 | 43446094 | 43446429 |



|      |          |          |
|------|----------|----------|
| chr1 | 43450457 | 43450730 |
| chr1 | 43450765 | 43451359 |
| chr1 | 43462723 | 43463032 |
| chr1 | 43465981 | 43466180 |
| chr1 | 43471832 | 43472176 |
| chr1 | 43472176 | 43472655 |
| chr1 | 43474472 | 43474855 |
| chr1 | 43500756 | 43500993 |
| chr1 | 43522190 | 43522360 |
| chr1 | 43530345 | 43530503 |
| chr1 | 43544569 | 43544947 |
| chr1 | 43549447 | 43549903 |
| chr1 | 43593609 | 43594057 |
| chr1 | 43596244 | 43596413 |
| chr1 | 43635806 | 43635981 |
| chr1 | 43698570 | 43698769 |
| chr1 | 43701089 | 43701497 |
| chr1 | 43714882 | 43715255 |
| chr1 | 43715255 | 43715771 |
| chr1 | 43719531 | 43719732 |
| chr1 | 43738269 | 43738497 |
| chr1 | 43742276 | 43742467 |
| chr1 | 43760198 | 43760355 |
| chr1 | 43766342 | 43766710 |
| chr1 | 43768439 | 43768713 |
| chr1 | 43768713 | 43769007 |
| chr1 | 43777726 | 43778001 |
| chr1 | 43778001 | 43778241 |
| chr1 | 43778375 | 43778962 |
| chr1 | 43779500 | 43779708 |
| chr1 | 43785301 | 43785677 |
| chr1 | 43818032 | 43818243 |
| chr1 | 43819042 | 43819414 |
| chr1 | 43819414 | 43819791 |
| chr1 | 43826593 | 43826866 |
| chr1 | 43826940 | 43827197 |
| chr1 | 43827197 | 43827560 |
| chr1 | 43827560 | 43828247 |
| chr1 | 43895771 | 43896225 |
| chr1 | 43896474 | 43896631 |
| chr1 | 43899054 | 43899293 |
| chr1 | 43899293 | 43899461 |

|      |          |          |
|------|----------|----------|
| chr1 | 43902920 | 43903254 |
| chr1 | 43918075 | 43918448 |
| chr1 | 43933467 | 43934080 |
| chr1 | 43934080 | 43934486 |
| chr1 | 43964467 | 43964629 |
| chr1 | 43969338 | 43969705 |
| chr1 | 43971155 | 43971428 |
| chr1 | 44041879 | 44042099 |
| chr1 | 44064711 | 44064928 |
| chr1 | 44094289 | 44094666 |
| chr1 | 44101533 | 44101900 |
| chr1 | 44101900 | 44102286 |
| chr1 | 44102286 | 44102844 |
| chr1 | 44118514 | 44119096 |
| chr1 | 44119226 | 44119538 |
| chr1 | 44119538 | 44119808 |
| chr1 | 44119808 | 44120095 |
| chr1 | 44120095 | 44120323 |
| chr1 | 44147524 | 44148004 |
| chr1 | 44148004 | 44148471 |
| chr1 | 44198393 | 44198579 |
| chr1 | 44198666 | 44198840 |
| chr1 | 44198840 | 44199079 |
| chr1 | 44201193 | 44201391 |
| chr1 | 44242066 | 44242386 |
| chr1 | 44242438 | 44242786 |
| chr1 | 44367253 | 44367407 |
| chr1 | 44392000 | 44392530 |
| chr1 | 44398088 | 44398385 |
| chr1 | 44424638 | 44424896 |
| chr1 | 44551478 | 44551754 |
| chr1 | 44551754 | 44552320 |
| chr1 | 44552362 | 44552652 |
| chr1 | 44584823 | 44585114 |
| chr1 | 45207994 | 45208170 |
| chr1 | 45314087 | 45314283 |
| chr1 | 45355985 | 45356274 |
| chr1 | 45430543 | 45430693 |
| chr1 | 45431970 | 45432236 |
| chr1 | 45495122 | 45495288 |
| chr1 | 45527446 | 45527997 |
| chr1 | 45539099 | 45539690 |

|      |          |          |
|------|----------|----------|
| chr1 | 45539690 | 45540024 |
| chr1 | 45541202 | 45541502 |
| chr1 | 45580436 | 45580894 |
| chr1 | 45580960 | 45581161 |
| chr1 | 45626035 | 45626274 |
| chr1 | 45626816 | 45626994 |
| chr1 | 45627952 | 45628225 |
| chr1 | 45672815 | 45673118 |
| chr1 | 45675659 | 45676317 |
| chr1 | 45700959 | 45701219 |
| chr1 | 45709360 | 45709467 |
| chr1 | 45709467 | 45709512 |
| chr1 | 45734057 | 45734306 |
| chr1 | 45735179 | 45735426 |
| chr1 | 45739036 | 45739205 |
| chr1 | 45756804 | 45757118 |
| chr1 | 45776638 | 45776995 |
| chr1 | 45777482 | 45777965 |
| chr1 | 45780719 | 45780944 |
| chr1 | 45780944 | 45781243 |
| chr1 | 45794885 | 45795308 |
| chr1 | 45795308 | 45795603 |
| chr1 | 45795603 | 45795966 |
| chr1 | 45816955 | 45817185 |
| chr1 | 45825218 | 45825496 |
| chr1 | 45830461 | 45830776 |
| chr1 | 45832526 | 45832808 |
| chr1 | 45837679 | 45838125 |
| chr1 | 45838333 | 45838597 |
| chr1 | 45842841 | 45843021 |
| chr1 | 45864517 | 45864767 |
| chr1 | 45864821 | 45864986 |
| chr1 | 45866690 | 45866978 |
| chr1 | 45917129 | 45917491 |
| chr1 | 45917561 | 45917747 |
| chr1 | 45921072 | 45921252 |
| chr1 | 45925108 | 45925383 |
| chr1 | 45925474 | 45925798 |
| chr1 | 45925798 | 45926076 |
| chr1 | 45926076 | 45926495 |
| chr1 | 46018474 | 46018687 |
| chr1 | 46055519 | 46055711 |

|      |          |          |
|------|----------|----------|
| chr1 | 46066528 | 46066951 |
| chr1 | 46066951 | 46067292 |
| chr1 | 46075905 | 46076249 |
| chr1 | 46128068 | 46128431 |
| chr1 | 46325457 | 46325607 |
| chr1 | 46360963 | 46361247 |
| chr1 | 46377192 | 46377438 |
| chr1 | 46378811 | 46378984 |
| chr1 | 46408116 | 46408356 |
| chr1 | 46408356 | 46408653 |
| chr1 | 46408717 | 46409045 |
| chr1 | 46409045 | 46409266 |
| chr1 | 46413892 | 46414096 |
| chr1 | 46415024 | 46415232 |
| chr1 | 46416750 | 46416992 |
| chr1 | 46732533 | 46732689 |
| chr1 | 46782294 | 46782563 |
| chr1 | 46808756 | 46808931 |
| chr1 | 46849824 | 46850101 |
| chr1 | 46852282 | 46852491 |
| chr1 | 46852672 | 46853197 |
| chr1 | 46853197 | 46853590 |
| chr1 | 46853590 | 46853930 |
| chr1 | 46853930 | 46854309 |
| chr1 | 46863814 | 46864165 |
| chr1 | 46864165 | 46864506 |
| chr1 | 46864506 | 46864804 |
| chr1 | 46871218 | 46871480 |
| chr1 | 46873493 | 46873780 |
| chr1 | 46873780 | 46874164 |
| chr1 | 46879603 | 46879889 |
| chr1 | 46880001 | 46880357 |
| chr1 | 46884440 | 46885034 |
| chr1 | 46885166 | 46885829 |
| chr1 | 46894589 | 46894830 |
| chr1 | 46912869 | 46913076 |
| chr1 | 46963375 | 46963686 |
| chr1 | 46964006 | 46964229 |
| chr1 | 46970544 | 46970750 |
| chr1 | 47004389 | 47004817 |
| chr1 | 47014097 | 47014527 |
| chr1 | 47014634 | 47015099 |

|      |          |          |
|------|----------|----------|
| chr1 | 47021503 | 47021666 |
| chr1 | 47034667 | 47034857 |
| chr1 | 47036491 | 47036721 |
| chr1 | 47036721 | 47037045 |
| chr1 | 47039313 | 47039844 |
| chr1 | 47051110 | 47051490 |
| chr1 | 47190261 | 47190499 |
| chr1 | 47277836 | 47278044 |
| chr1 | 47300752 | 47301140 |
| chr1 | 47306995 | 47307254 |
| chr1 | 47398705 | 47399312 |
| chr1 | 47399696 | 47399925 |
| chr1 | 47545698 | 47545914 |
| chr1 | 48090152 | 48090331 |
| chr1 | 48462159 | 48462353 |
| chr1 | 50459505 | 50459812 |
| chr1 | 50480723 | 50481020 |
| chr1 | 50481265 | 50481474 |
| chr1 | 50507235 | 50507471 |
| chr1 | 50507901 | 50508261 |
| chr1 | 50855137 | 50855532 |
| chr1 | 50890696 | 50890946 |
| chr1 | 50900379 | 50900674 |
| chr1 | 50926759 | 50927031 |
| chr1 | 50927031 | 50927327 |
| chr1 | 50927327 | 50927702 |
| chr1 | 50927702 | 50928210 |
| chr1 | 50962372 | 50962613 |
| chr1 | 50967627 | 50967779 |
| chr1 | 50980196 | 50980566 |
| chr1 | 51003869 | 51004052 |
| chr1 | 51058270 | 51058585 |
| chr1 | 51064597 | 51064931 |
| chr1 | 51064931 | 51065142 |
| chr1 | 51065376 | 51065689 |
| chr1 | 51065689 | 51066091 |
| chr1 | 51111958 | 51112499 |
| chr1 | 51113736 | 51113969 |
| chr1 | 51122158 | 51122851 |
| chr1 | 51136845 | 51137049 |
| chr1 | 51143790 | 51144120 |
| chr1 | 51165440 | 51165634 |

|      |          |          |
|------|----------|----------|
| chr1 | 51198055 | 51198277 |
| chr1 | 51217273 | 51217583 |
| chr1 | 51243261 | 51243682 |
| chr1 | 51250121 | 51250648 |
| chr1 | 51250648 | 51250923 |
| chr1 | 51260166 | 51260528 |
| chr1 | 51265067 | 51265692 |
| chr1 | 51265830 | 51266279 |
| chr1 | 51268252 | 51268607 |
| chr1 | 51282926 | 51283204 |
| chr1 | 51286875 | 51287285 |
| chr1 | 51288716 | 51289033 |
| chr1 | 51289033 | 51289336 |
| chr1 | 51289336 | 51289623 |
| chr1 | 51289623 | 51289926 |
| chr1 | 51297087 | 51297258 |
| chr1 | 51299073 | 51299233 |
| chr1 | 51301292 | 51301557 |
| chr1 | 51302685 | 51302884 |
| chr1 | 51303248 | 51303465 |
| chr1 | 51303621 | 51303806 |
| chr1 | 51303806 | 51303993 |
| chr1 | 51304118 | 51304325 |
| chr1 | 51304325 | 51304539 |
| chr1 | 51333665 | 51333865 |
| chr1 | 51333970 | 51334285 |
| chr1 | 51334321 | 51334489 |
| chr1 | 51370366 | 51370583 |
| chr1 | 51382207 | 51382607 |
| chr1 | 51386876 | 51387329 |
| chr1 | 51401796 | 51402014 |
| chr1 | 51402014 | 51402201 |
| chr1 | 51404414 | 51404694 |
| chr1 | 51404737 | 51405283 |
| chr1 | 51448589 | 51449381 |
| chr1 | 51459046 | 51459357 |
| chr1 | 51466475 | 51466913 |
| chr1 | 51466926 | 51467107 |
| chr1 | 51467900 | 51468407 |
| chr1 | 51468407 | 51468675 |
| chr1 | 51476505 | 51476703 |
| chr1 | 51477674 | 51477868 |

|      |          |          |
|------|----------|----------|
| chr1 | 51477900 | 51478081 |
| chr1 | 51478097 | 51478437 |
| chr1 | 51478437 | 51478884 |
| chr1 | 51499191 | 51499455 |
| chr1 | 51505625 | 51506034 |
| chr1 | 51507240 | 51507460 |
| chr1 | 51508568 | 51508828 |
| chr1 | 51509052 | 51509424 |
| chr1 | 51525672 | 51525874 |
| chr1 | 51525923 | 51526217 |
| chr1 | 51530082 | 51530621 |
| chr1 | 51531005 | 51531256 |
| chr1 | 51552260 | 51552450 |
| chr1 | 51562636 | 51562921 |
| chr1 | 51584674 | 51585414 |
| chr1 | 51597021 | 51597321 |
| chr1 | 51597326 | 51597483 |
| chr1 | 51600509 | 51600748 |
| chr1 | 51615546 | 51615821 |
| chr1 | 51643652 | 51643972 |
| chr1 | 51644498 | 51644669 |
| chr1 | 51688002 | 51688181 |
| chr1 | 51720414 | 51720569 |
| chr1 | 51747426 | 51748021 |
| chr1 | 51748346 | 51748608 |
| chr1 | 51789310 | 51789835 |
| chr1 | 51808315 | 51808511 |
| chr1 | 51815720 | 51815935 |
| chr1 | 51829364 | 51829576 |
| chr1 | 51830992 | 51831191 |
| chr1 | 51837943 | 51838093 |
| chr1 | 51848528 | 51848982 |
| chr1 | 51849056 | 51849289 |
| chr1 | 51849609 | 51849865 |
| chr1 | 51849910 | 51850087 |
| chr1 | 51852360 | 51852538 |
| chr1 | 51853211 | 51853937 |
| chr1 | 51854558 | 51854754 |
| chr1 | 51856219 | 51856545 |
| chr1 | 51856577 | 51856843 |
| chr1 | 51913160 | 51913343 |
| chr1 | 51914999 | 51915443 |

|      |          |          |
|------|----------|----------|
| chr1 | 51915443 | 51915858 |
| chr1 | 51915858 | 51916210 |
| chr1 | 51944927 | 51945155 |
| chr1 | 51963144 | 51963380 |
| chr1 | 51996658 | 51997244 |
| chr1 | 52004160 | 52004342 |
| chr1 | 52035434 | 52035655 |
| chr1 | 52039248 | 52039398 |
| chr1 | 52049901 | 52050051 |
| chr1 | 52113172 | 52113634 |
| chr1 | 52113634 | 52114090 |
| chr1 | 52118965 | 52119218 |
| chr1 | 52119218 | 52119622 |
| chr1 | 52119622 | 52120100 |
| chr1 | 52146629 | 52146905 |
| chr1 | 52169967 | 52170493 |
| chr1 | 52170568 | 52170719 |
| chr1 | 52171410 | 52171608 |
| chr1 | 52190347 | 52190637 |
| chr1 | 52232346 | 52232550 |
| chr1 | 52232760 | 52233740 |
| chr1 | 52234655 | 52234936 |
| chr1 | 52250972 | 52251367 |
| chr1 | 52252546 | 52252706 |
| chr1 | 52254052 | 52254235 |
| chr1 | 52254272 | 52254519 |
| chr1 | 52254519 | 52254833 |
| chr1 | 52267666 | 52267887 |
| chr1 | 52270346 | 52270729 |
| chr1 | 52282778 | 52283021 |
| chr1 | 52302625 | 52302880 |
| chr1 | 52331541 | 52331733 |
| chr1 | 52354413 | 52354616 |
| chr1 | 52388867 | 52389176 |
| chr1 | 52389197 | 52389359 |
| chr1 | 52419502 | 52419719 |
| chr1 | 52427930 | 52428195 |
| chr1 | 52429448 | 52429692 |
| chr1 | 52430196 | 52430392 |
| chr1 | 52454533 | 52454770 |
| chr1 | 52454770 | 52455230 |
| chr1 | 52456517 | 52457133 |



|      |          |          |
|------|----------|----------|
| chr1 | 52499684 | 52500178 |
| chr1 | 52500178 | 52500641 |
| chr1 | 52500641 | 52501065 |
| chr1 | 52501604 | 52502085 |
| chr1 | 52514451 | 52514651 |
| chr1 | 52530034 | 52530213 |
| chr1 | 52578279 | 52578529 |
| chr1 | 52578529 | 52578821 |
| chr1 | 52580574 | 52580816 |
| chr1 | 52597811 | 52598172 |
| chr1 | 52598240 | 52598395 |
| chr1 | 52600462 | 52600619 |
| chr1 | 52630458 | 52630935 |
| chr1 | 52630935 | 52631294 |
| chr1 | 52631361 | 52631604 |
| chr1 | 52631673 | 52631905 |
| chr1 | 52647840 | 52647993 |
| chr1 | 52648211 | 52648436 |
| chr1 | 52652602 | 52652908 |
| chr1 | 52675561 | 52675887 |
| chr1 | 52676798 | 52677022 |
| chr1 | 52687752 | 52687919 |
| chr1 | 52702782 | 52703104 |
| chr1 | 52703104 | 52703422 |
| chr1 | 52703422 | 52703685 |
| chr1 | 52712228 | 52712434 |
| chr1 | 52718427 | 52718674 |
| chr1 | 52724251 | 52724514 |
| chr1 | 52726308 | 52726706 |
| chr1 | 52726706 | 52727126 |
| chr1 | 52727126 | 52727585 |
| chr1 | 52748354 | 52748506 |
| chr1 | 52765166 | 52765471 |
| chr1 | 52793628 | 52793888 |
| chr1 | 52799396 | 52799761 |
| chr1 | 52799780 | 52800100 |
| chr1 | 52802465 | 52802788 |
| chr1 | 52803034 | 52803184 |
| chr1 | 52816926 | 52817290 |
| chr1 | 52817290 | 52817600 |
| chr1 | 52817600 | 52817989 |
| chr1 | 52844665 | 52845348 |

|      |          |          |
|------|----------|----------|
| chr1 | 52854112 | 52854348 |
| chr1 | 52952589 | 52953056 |
| chr1 | 52953056 | 52953452 |
| chr1 | 53296667 | 53297444 |
| chr1 | 53298968 | 53299137 |
| chr1 | 53312581 | 53312753 |
| chr1 | 53313340 | 53313756 |
| chr1 | 53313756 | 53314031 |
| chr1 | 53352228 | 53352567 |
| chr1 | 53352567 | 53352934 |
| chr1 | 53692679 | 53693005 |
| chr1 | 53694126 | 53694643 |
| chr1 | 53696693 | 53696856 |
| chr1 | 53715985 | 53716201 |
| chr1 | 53720715 | 53720880 |
| chr1 | 53720963 | 53721328 |
| chr1 | 53721399 | 53721713 |
| chr1 | 53721767 | 53721919 |
| chr1 | 53728497 | 53728820 |
| chr1 | 53728855 | 53729177 |
| chr1 | 53757951 | 53758341 |
| chr1 | 53761679 | 53762072 |
| chr1 | 53762102 | 53762413 |
| chr1 | 53763690 | 53764027 |
| chr1 | 53784303 | 53784514 |
| chr1 | 53784514 | 53784926 |
| chr1 | 53784926 | 53785490 |
| chr1 | 53797560 | 53797743 |
| chr1 | 53797794 | 53798188 |
| chr1 | 53808270 | 53808547 |
| chr1 | 53808659 | 53809049 |
| chr1 | 53814220 | 53814374 |
| chr1 | 53822024 | 53822330 |
| chr1 | 53823686 | 53824144 |
| chr1 | 53824144 | 53824388 |
| chr1 | 53838063 | 53838514 |
| chr1 | 53838514 | 53838916 |
| chr1 | 53845021 | 53845179 |
| chr1 | 53845222 | 53845671 |
| chr1 | 53845859 | 53846271 |
| chr1 | 53846271 | 53846507 |
| chr1 | 53855756 | 53856064 |

|      |          |          |
|------|----------|----------|
| chr1 | 53856238 | 53856530 |
| chr1 | 53856652 | 53856919 |
| chr1 | 53866469 | 53866780 |
| chr1 | 53881844 | 53882049 |
| chr1 | 53890517 | 53890690 |
| chr1 | 53909192 | 53909454 |
| chr1 | 53931396 | 53931624 |
| chr1 | 53931734 | 53931898 |
| chr1 | 53939362 | 53939620 |
| chr1 | 53940235 | 53940619 |
| chr1 | 54122030 | 54122190 |
| chr1 | 54187693 | 54187856 |
| chr1 | 54194193 | 54194380 |
| chr1 | 54194380 | 54194634 |
| chr1 | 54194762 | 54195054 |
| chr1 | 54250466 | 54251150 |
| chr1 | 54253314 | 54253464 |
| chr1 | 54323077 | 54323254 |
| chr1 | 54380729 | 54380879 |
| chr1 | 54381351 | 54381566 |
| chr1 | 54430240 | 54430400 |
| chr1 | 54438371 | 54438730 |
| chr1 | 54438730 | 54439177 |
| chr1 | 54448248 | 54448493 |
| chr1 | 54467425 | 54467698 |
| chr1 | 54492429 | 54492760 |
| chr1 | 54544848 | 54545225 |
| chr1 | 54556869 | 54557072 |
| chr1 | 54557072 | 54557291 |
| chr1 | 54557291 | 54557528 |
| chr1 | 54557528 | 54557814 |
| chr1 | 54557814 | 54558167 |
| chr1 | 54584637 | 54585015 |
| chr1 | 54585968 | 54586222 |
| chr1 | 54600212 | 54600728 |
| chr1 | 54600728 | 54601035 |
| chr1 | 54601252 | 54601427 |
| chr1 | 54603874 | 54604329 |
| chr1 | 54606123 | 54606489 |
| chr1 | 54609784 | 54610098 |
| chr1 | 54611944 | 54612332 |
| chr1 | 54612332 | 54612674 |

|      |          |          |
|------|----------|----------|
| chr1 | 54612961 | 54613260 |
| chr1 | 54639174 | 54639328 |
| chr1 | 54647272 | 54647820 |
| chr1 | 54653040 | 54653340 |
| chr1 | 54658588 | 54658870 |
| chr1 | 54660629 | 54661204 |
| chr1 | 54661372 | 54661699 |
| chr1 | 54666049 | 54666292 |
| chr1 | 54713294 | 54713551 |
| chr1 | 54713578 | 54713734 |
| chr1 | 54713860 | 54714120 |
| chr1 | 54768805 | 54768955 |
| chr1 | 54785902 | 54786062 |
| chr1 | 54823609 | 54823795 |
| chr1 | 54826270 | 54826667 |
| chr1 | 54826667 | 54827091 |
| chr1 | 54830208 | 54830599 |
| chr1 | 54832803 | 54833041 |
| chr1 | 54882297 | 54882498 |
| chr1 | 54882498 | 54882685 |
| chr1 | 54882685 | 54882843 |
| chr1 | 54882843 | 54883050 |
| chr1 | 54902914 | 54903072 |
| chr1 | 54909151 | 54909303 |
| chr1 | 54909898 | 54910177 |
| chr1 | 54920166 | 54920469 |
| chr1 | 54922416 | 54922581 |
| chr1 | 54925586 | 54926241 |
| chr1 | 54926241 | 54926539 |
| chr1 | 54926539 | 54926761 |
| chr1 | 54930793 | 54931107 |
| chr1 | 54934921 | 54935164 |
| chr1 | 54954976 | 54955152 |
| chr1 | 54966933 | 54967170 |
| chr1 | 54983374 | 54983653 |
| chr1 | 55012610 | 55012825 |
| chr1 | 55026823 | 55027068 |
| chr1 | 55027068 | 55027323 |
| chr1 | 55027323 | 55027875 |
| chr1 | 55033976 | 55034136 |
| chr1 | 55043277 | 55043427 |
| chr1 | 55052291 | 55052931 |

|      |          |          |
|------|----------|----------|
| chr1 | 55052931 | 55053366 |
| chr1 | 55073039 | 55073333 |
| chr1 | 55073518 | 55073673 |
| chr1 | 55074897 | 55075126 |
| chr1 | 55075497 | 55075663 |
| chr1 | 55075732 | 55075970 |
| chr1 | 55076458 | 55076609 |
| chr1 | 55076823 | 55077127 |
| chr1 | 55082189 | 55082410 |
| chr1 | 55087316 | 55087715 |
| chr1 | 55087715 | 55088039 |
| chr1 | 55088039 | 55088669 |
| chr1 | 55097290 | 55097537 |
| chr1 | 55097537 | 55097790 |
| chr1 | 55108684 | 55108834 |
| chr1 | 55130893 | 55131171 |
| chr1 | 55131171 | 55131516 |
| chr1 | 55131516 | 55131982 |
| chr1 | 55133261 | 55133416 |
| chr1 | 55133500 | 55133664 |
| chr1 | 55162014 | 55162220 |
| chr1 | 55163901 | 55164452 |
| chr1 | 55165266 | 55165429 |
| chr1 | 55172267 | 55172417 |
| chr1 | 55185799 | 55186030 |
| chr1 | 55186594 | 55186795 |
| chr1 | 55192046 | 55192223 |
| chr1 | 55193211 | 55193668 |
| chr1 | 55196425 | 55196604 |
| chr1 | 55201775 | 55202111 |
| chr1 | 55202171 | 55202448 |
| chr1 | 55202470 | 55202704 |
| chr1 | 55209144 | 55209330 |
| chr1 | 55228277 | 55228553 |
| chr1 | 55228553 | 55228827 |
| chr1 | 55236946 | 55237445 |
| chr1 | 55237445 | 55237844 |
| chr1 | 55237844 | 55238114 |
| chr1 | 55238114 | 55238280 |
| chr1 | 55239380 | 55239583 |
| chr1 | 55363265 | 55363656 |
| chr1 | 55363656 | 55364012 |

|      |          |          |
|------|----------|----------|
| chr1 | 55377849 | 55378007 |
| chr1 | 55383184 | 55383445 |
| chr1 | 55405610 | 55406087 |
| chr1 | 55406087 | 55406463 |
| chr1 | 55410720 | 55411017 |
| chr1 | 55454205 | 55454399 |
| chr1 | 55488357 | 55488548 |
| chr1 | 55489423 | 55489786 |
| chr1 | 55528491 | 55529245 |
| chr1 | 55531686 | 55531888 |
| chr1 | 55533780 | 55533954 |
| chr1 | 55533954 | 55534138 |
| chr1 | 55569429 | 55569588 |
| chr1 | 55574694 | 55574890 |
| chr1 | 55575856 | 55576546 |
| chr1 | 55582352 | 55582611 |
| chr1 | 55610337 | 55610606 |
| chr1 | 55620490 | 55620682 |
| chr1 | 55624336 | 55624652 |
| chr1 | 55627697 | 55627884 |
| chr1 | 55736452 | 55736680 |
| chr1 | 55812610 | 55812814 |
| chr1 | 55826992 | 55827267 |
| chr1 | 55827267 | 55827770 |
| chr1 | 55828263 | 55828514 |
| chr1 | 55833728 | 55833895 |
| chr1 | 55838277 | 55838428 |
| chr1 | 55865116 | 55865806 |
| chr1 | 55874211 | 55874485 |
| chr1 | 55874837 | 55874992 |
| chr1 | 55886465 | 55886685 |
| chr1 | 56206989 | 56207191 |
| chr1 | 56546292 | 56546473 |
| chr1 | 56630959 | 56631119 |
| chr1 | 56668150 | 56668435 |
| chr1 | 56681050 | 56681337 |
| chr1 | 56681337 | 56681623 |
| chr1 | 56681623 | 56681839 |
| chr1 | 56685137 | 56685499 |
| chr1 | 56695272 | 56695607 |
| chr1 | 56759419 | 56759814 |
| chr1 | 56782235 | 56782454 |

|      |          |          |
|------|----------|----------|
| chr1 | 56888953 | 56889149 |
| chr1 | 56896802 | 56896952 |
| chr1 | 56953077 | 56953371 |
| chr1 | 56971512 | 56971858 |
| chr1 | 56972007 | 56972446 |
| chr1 | 56972446 | 56972715 |
| chr1 | 56972715 | 56972974 |
| chr1 | 56972974 | 56973334 |
| chr1 | 56973348 | 56973617 |
| chr1 | 56973666 | 56973849 |
| chr1 | 56977179 | 56977448 |
| chr1 | 56977493 | 56977687 |
| chr1 | 56980039 | 56980261 |
| chr1 | 56991706 | 56991873 |
| chr1 | 57204364 | 57204670 |
| chr1 | 57205701 | 57205871 |
| chr1 | 57223494 | 57223649 |
| chr1 | 57269798 | 57269973 |
| chr1 | 57332629 | 57332851 |
| chr1 | 57377164 | 57377325 |
| chr1 | 57377378 | 57377723 |
| chr1 | 57377723 | 57378270 |
| chr1 | 57378382 | 57378624 |
| chr1 | 57406071 | 57406563 |
| chr1 | 57406563 | 57406824 |
| chr1 | 57406824 | 57407317 |
| chr1 | 57428964 | 57429222 |
| chr1 | 57430185 | 57430446 |
| chr1 | 57450345 | 57450596 |
| chr1 | 57773972 | 57774302 |
| chr1 | 57774336 | 57774659 |
| chr1 | 57774659 | 57774888 |
| chr1 | 57774888 | 57775093 |
| chr1 | 57775093 | 57775396 |
| chr1 | 57845385 | 57845628 |
| chr1 | 57849169 | 57849462 |
| chr1 | 57850001 | 57850220 |
| chr1 | 57852649 | 57852870 |
| chr1 | 57874048 | 57874428 |
| chr1 | 57884934 | 57885084 |
| chr1 | 57892423 | 57892612 |
| chr1 | 57898090 | 57898409 |

|      |          |          |
|------|----------|----------|
| chr1 | 57898441 | 57898743 |
| chr1 | 57898743 | 57899186 |
| chr1 | 57969278 | 57969512 |
| chr1 | 57969512 | 57969838 |
| chr1 | 57969838 | 57970363 |
| chr1 | 57989109 | 57989687 |
| chr1 | 57995730 | 57996071 |
| chr1 | 57996071 | 57996401 |
| chr1 | 57996401 | 57996705 |
| chr1 | 58029554 | 58030196 |
| chr1 | 58030257 | 58030508 |
| chr1 | 58030596 | 58030934 |
| chr1 | 58031261 | 58031491 |
| chr1 | 58072998 | 58073263 |
| chr1 | 58073266 | 58073646 |
| chr1 | 58079776 | 58079926 |
| chr1 | 58081456 | 58081676 |
| chr1 | 58092321 | 58092489 |
| chr1 | 58111342 | 58111685 |
| chr1 | 58112862 | 58113218 |
| chr1 | 58144242 | 58144544 |
| chr1 | 58144544 | 58144736 |
| chr1 | 58144736 | 58144937 |
| chr1 | 58257150 | 58257602 |
| chr1 | 58257631 | 58257919 |
| chr1 | 58271206 | 58271493 |
| chr1 | 58288242 | 58288451 |
| chr1 | 58289872 | 58290110 |
| chr1 | 58296366 | 58296689 |
| chr1 | 58300824 | 58301210 |
| chr1 | 58304413 | 58304724 |
| chr1 | 58308555 | 58308929 |
| chr1 | 58309944 | 58310137 |
| chr1 | 58335715 | 58335878 |
| chr1 | 58341702 | 58341899 |
| chr1 | 58343848 | 58344254 |
| chr1 | 58346868 | 58347172 |
| chr1 | 58347196 | 58347387 |
| chr1 | 58351380 | 58351808 |
| chr1 | 58352001 | 58352224 |
| chr1 | 58353362 | 58354034 |
| chr1 | 58359030 | 58359536 |



|      |          |          |
|------|----------|----------|
| chr1 | 58359536 | 58359922 |
| chr1 | 58366537 | 58367102 |
| chr1 | 58367102 | 58367361 |
| chr1 | 58374185 | 58374546 |
| chr1 | 58392266 | 58392621 |
| chr1 | 58392621 | 58392926 |
| chr1 | 58392926 | 58393231 |
| chr1 | 58393231 | 58393550 |
| chr1 | 58393550 | 58393842 |
| chr1 | 58393870 | 58394109 |
| chr1 | 58407620 | 58408001 |
| chr1 | 58408328 | 58408614 |
| chr1 | 58409382 | 58409558 |
| chr1 | 58409676 | 58409789 |
| chr1 | 58409789 | 58409852 |
| chr1 | 58409852 | 58410036 |
| chr1 | 58410277 | 58410427 |
| chr1 | 58410870 | 58411061 |
| chr1 | 58415576 | 58415789 |
| chr1 | 58415885 | 58416149 |
| chr1 | 58416183 | 58416396 |
| chr1 | 58422932 | 58423221 |
| chr1 | 58423371 | 58423581 |
| chr1 | 58423581 | 58423899 |
| chr1 | 58423899 | 58424224 |
| chr1 | 58424224 | 58424440 |
| chr1 | 58425863 | 58426148 |
| chr1 | 58431028 | 58431272 |
| chr1 | 58433907 | 58434127 |
| chr1 | 58434127 | 58434457 |
| chr1 | 58435788 | 58435945 |
| chr1 | 58445062 | 58445382 |
| chr1 | 58445382 | 58445871 |
| chr1 | 58460631 | 58460937 |
| chr1 | 58504511 | 58504854 |
| chr1 | 58504854 | 58505280 |
| chr1 | 58540071 | 58540490 |
| chr1 | 58540659 | 58540876 |
| chr1 | 58541530 | 58541799 |
| chr1 | 58549413 | 58549756 |
| chr1 | 58577359 | 58577564 |
| chr1 | 58585769 | 58586133 |

|      |          |          |
|------|----------|----------|
| chr1 | 58586133 | 58586448 |
| chr1 | 58586448 | 58586713 |
| chr1 | 58586713 | 58586905 |
| chr1 | 58606993 | 58607198 |
| chr1 | 58613843 | 58614087 |
| chr1 | 58614452 | 58614936 |
| chr1 | 58636516 | 58636666 |
| chr1 | 58651642 | 58652127 |
| chr1 | 58652127 | 58652373 |
| chr1 | 58652448 | 58652926 |
| chr1 | 58652926 | 58653315 |
| chr1 | 58662782 | 58662933 |
| chr1 | 58663092 | 58663348 |
| chr1 | 58663348 | 58663893 |
| chr1 | 58664323 | 58664615 |
| chr1 | 58677390 | 58677913 |
| chr1 | 58678427 | 58678580 |
| chr1 | 58690454 | 58690632 |
| chr1 | 58692100 | 58692292 |
| chr1 | 58692330 | 58692874 |
| chr1 | 58697661 | 58697970 |
| chr1 | 58703283 | 58703640 |
| chr1 | 58711412 | 58712163 |
| chr1 | 58712232 | 58712408 |
| chr1 | 58712458 | 58713039 |
| chr1 | 58713150 | 58713341 |
| chr1 | 58720071 | 58720537 |
| chr1 | 58722121 | 58722422 |
| chr1 | 58725857 | 58726106 |
| chr1 | 58727051 | 58727405 |
| chr1 | 58729372 | 58729838 |
| chr1 | 58742220 | 58742878 |
| chr1 | 58742878 | 58743101 |
| chr1 | 58761295 | 58761934 |
| chr1 | 58762071 | 58762303 |
| chr1 | 58770204 | 58770365 |
| chr1 | 58773395 | 58773560 |
| chr1 | 58777688 | 58777845 |
| chr1 | 58794963 | 58795243 |
| chr1 | 58795243 | 58795562 |
| chr1 | 58795562 | 58796021 |
| chr1 | 58796258 | 58796433 |

|      |          |          |
|------|----------|----------|
| chr1 | 58797291 | 58797628 |
| chr1 | 58830819 | 58831215 |
| chr1 | 58831490 | 58831751 |
| chr1 | 58849342 | 58849536 |
| chr1 | 58856775 | 58857144 |
| chr1 | 58857144 | 58857399 |
| chr1 | 58857831 | 58858123 |
| chr1 | 58859288 | 58859497 |
| chr1 | 58859675 | 58860229 |
| chr1 | 58890245 | 58890414 |
| chr1 | 58897592 | 58897912 |
| chr1 | 58909555 | 58909930 |
| chr1 | 58909930 | 58910171 |
| chr1 | 58946068 | 58946607 |
| chr1 | 58950873 | 58951252 |
| chr1 | 58951292 | 58951648 |
| chr1 | 58972976 | 58973709 |
| chr1 | 58973709 | 58974104 |
| chr1 | 58974104 | 58974452 |
| chr1 | 58993234 | 58993453 |
| chr1 | 59068073 | 59068301 |
| chr1 | 59070922 | 59071175 |
| chr1 | 59071209 | 59071365 |
| chr1 | 59119653 | 59119991 |
| chr1 | 59119991 | 59120598 |
| chr1 | 59141486 | 59141650 |
| chr1 | 59142890 | 59143055 |
| chr1 | 59144616 | 59144831 |
| chr1 | 59147696 | 59147920 |
| chr1 | 59162519 | 59162886 |
| chr1 | 59162886 | 59163569 |
| chr1 | 59176572 | 59176795 |
| chr1 | 59177956 | 59178166 |
| chr1 | 59178217 | 59178514 |
| chr1 | 59212166 | 59212333 |
| chr1 | 59236808 | 59237086 |
| chr1 | 59237086 | 59237292 |
| chr1 | 59237292 | 59237578 |
| chr1 | 59237620 | 59237838 |
| chr1 | 59237995 | 59238269 |
| chr1 | 59242774 | 59243021 |
| chr1 | 59247727 | 59247953 |

|      |          |          |
|------|----------|----------|
| chr1 | 59252849 | 59253070 |
| chr1 | 59256672 | 59256970 |
| chr1 | 59286605 | 59286760 |
| chr1 | 59292099 | 59292329 |
| chr1 | 59340672 | 59341205 |
| chr1 | 59400286 | 59400677 |
| chr1 | 59400725 | 59400885 |
| chr1 | 59400969 | 59401144 |
| chr1 | 59401144 | 59401258 |
| chr1 | 59401258 | 59401309 |
| chr1 | 59428059 | 59428209 |
| chr1 | 59428810 | 59429159 |
| chr1 | 59444182 | 59444645 |
| chr1 | 59464047 | 59464401 |
| chr1 | 59464740 | 59465366 |
| chr1 | 59475714 | 59475872 |
| chr1 | 59481575 | 59481805 |
| chr1 | 59481847 | 59482263 |
| chr1 | 59482263 | 59482665 |
| chr1 | 59482665 | 59482970 |
| chr1 | 59483143 | 59483362 |
| chr1 | 59487597 | 59487828 |
| chr1 | 59487828 | 59488158 |
| chr1 | 59516688 | 59516885 |
| chr1 | 59531346 | 59531563 |
| chr1 | 59531563 | 59531805 |
| chr1 | 59566841 | 59567233 |
| chr1 | 59580113 | 59580778 |
| chr1 | 59584736 | 59584943 |
| chr1 | 59593750 | 59593986 |
| chr1 | 59604044 | 59604238 |
| chr1 | 59613838 | 59614061 |
| chr1 | 59617715 | 59617872 |
| chr1 | 59623380 | 59623697 |
| chr1 | 59669944 | 59670250 |
| chr1 | 59670250 | 59670616 |
| chr1 | 59670616 | 59670939 |
| chr1 | 59670939 | 59671289 |
| chr1 | 59684738 | 59685312 |
| chr1 | 59685509 | 59685714 |
| chr1 | 59685753 | 59685907 |
| chr1 | 59687559 | 59687825 |

|      |          |          |
|------|----------|----------|
| chr1 | 59690575 | 59690745 |
| chr1 | 59719163 | 59719352 |
| chr1 | 59719475 | 59719718 |
| chr1 | 59719718 | 59719985 |
| chr1 | 59719985 | 59720304 |
| chr1 | 59739348 | 59739524 |
| chr1 | 59739594 | 59739905 |
| chr1 | 59739909 | 59740217 |
| chr1 | 59744920 | 59745072 |
| chr1 | 59745122 | 59745382 |
| chr1 | 59762662 | 59763187 |
| chr1 | 59763187 | 59763605 |
| chr1 | 59763605 | 59763820 |
| chr1 | 59763820 | 59764044 |
| chr1 | 59764044 | 59764305 |
| chr1 | 59764420 | 59764570 |
| chr1 | 59764607 | 59764975 |
| chr1 | 59882546 | 59882761 |
| chr1 | 59883243 | 59883583 |
| chr1 | 59883801 | 59884049 |
| chr1 | 59895207 | 59895533 |
| chr1 | 59895533 | 59895807 |
| chr1 | 59896070 | 59896239 |
| chr1 | 59897825 | 59898194 |
| chr1 | 59912502 | 59913136 |
| chr1 | 59913136 | 59913463 |
| chr1 | 59913463 | 59913715 |
| chr1 | 59913715 | 59913967 |
| chr1 | 59915951 | 59916197 |
| chr1 | 59926381 | 59926555 |
| chr1 | 59930475 | 59930674 |
| chr1 | 59948090 | 59948434 |
| chr1 | 59963656 | 59963972 |
| chr1 | 59966188 | 59966495 |
| chr1 | 59966495 | 59966775 |
| chr1 | 59995523 | 59995878 |
| chr1 | 59999945 | 60000292 |
| chr1 | 60000292 | 60000776 |
| chr1 | 60000849 | 60001099 |
| chr1 | 60042552 | 60043090 |
| chr1 | 60043090 | 60043480 |
| chr1 | 60063853 | 60064066 |

|      |          |          |
|------|----------|----------|
| chr1 | 60097533 | 60097806 |
| chr1 | 60097806 | 60098091 |
| chr1 | 60098091 | 60098379 |
| chr1 | 60098379 | 60098804 |
| chr1 | 60137367 | 60137957 |
| chr1 | 60138526 | 60138880 |
| chr1 | 60152794 | 60153011 |
| chr1 | 60166577 | 60166821 |
| chr1 | 60166821 | 60167109 |
| chr1 | 60169425 | 60169824 |
| chr1 | 60169824 | 60170045 |
| chr1 | 60180036 | 60180448 |
| chr1 | 60180448 | 60180676 |
| chr1 | 60180676 | 60180939 |
| chr1 | 60180939 | 60181205 |
| chr1 | 60231957 | 60232177 |
| chr1 | 60235175 | 60235484 |
| chr1 | 60240547 | 60240718 |
| chr1 | 60342813 | 60343115 |
| chr1 | 60343115 | 60343411 |
| chr1 | 60343411 | 60343843 |
| chr1 | 60353367 | 60353556 |
| chr1 | 60353556 | 60353732 |
| chr1 | 60398253 | 60398449 |
| chr1 | 60408940 | 60409095 |
| chr1 | 60409153 | 60409540 |
| chr1 | 60409540 | 60409871 |
| chr1 | 60409871 | 60410283 |
| chr1 | 60428451 | 60428605 |
| chr1 | 60429027 | 60429204 |
| chr1 | 60464571 | 60464936 |
| chr1 | 60565215 | 60565608 |
| chr1 | 60565610 | 60565760 |
| chr1 | 60566186 | 60566400 |
| chr1 | 60566400 | 60566642 |
| chr1 | 60566642 | 60566924 |
| chr1 | 60566924 | 60567352 |
| chr1 | 60572838 | 60573043 |
| chr1 | 60573139 | 60573408 |
| chr1 | 60587708 | 60587954 |
| chr1 | 60603010 | 60603287 |
| chr1 | 60604583 | 60604831 |

|      |          |          |
|------|----------|----------|
| chr1 | 60609045 | 60609199 |
| chr1 | 60609199 | 60609423 |
| chr1 | 60609423 | 60609802 |
| chr1 | 60611287 | 60611531 |
| chr1 | 60613259 | 60613628 |
| chr1 | 60616707 | 60616863 |
| chr1 | 60616888 | 60617230 |
| chr1 | 60621788 | 60622155 |
| chr1 | 60622901 | 60623183 |
| chr1 | 60624147 | 60624515 |
| chr1 | 60636752 | 60637108 |
| chr1 | 60637108 | 60637408 |
| chr1 | 60658397 | 60658743 |
| chr1 | 60705046 | 60705225 |
| chr1 | 60744425 | 60744600 |
| chr1 | 60762592 | 60762745 |
| chr1 | 60815962 | 60816199 |
| chr1 | 60822990 | 60823267 |
| chr1 | 60824577 | 60824786 |
| chr1 | 60825861 | 60826255 |
| chr1 | 60839306 | 60839493 |
| chr1 | 60859893 | 60860188 |
| chr1 | 60860683 | 60860879 |
| chr1 | 60866612 | 60866841 |
| chr1 | 60875259 | 60875680 |
| chr1 | 60898769 | 60899009 |
| chr1 | 60916588 | 60916810 |
| chr1 | 60916875 | 60917114 |
| chr1 | 60919997 | 60920181 |
| chr1 | 60920283 | 60920866 |
| chr1 | 60961143 | 60961350 |
| chr1 | 60967977 | 60968309 |
| chr1 | 60983091 | 60983254 |
| chr1 | 60994305 | 60994477 |
| chr1 | 61050454 | 61050604 |
| chr1 | 61092173 | 61092360 |
| chr1 | 61095436 | 61095869 |
| chr1 | 61095869 | 61096175 |
| chr1 | 61097431 | 61097652 |
| chr1 | 61131713 | 61132097 |
| chr1 | 61136077 | 61136534 |
| chr1 | 61181164 | 61181417 |

|      |          |          |
|------|----------|----------|
| chr1 | 61203170 | 61203566 |
| chr1 | 61470671 | 61471079 |
| chr1 | 61480593 | 61480809 |
| chr1 | 61485593 | 61485781 |
| chr1 | 61638644 | 61639037 |
| chr1 | 61639037 | 61639365 |
| chr1 | 61639365 | 61639627 |
| chr1 | 61639662 | 61640066 |
| chr1 | 61641967 | 61642128 |
| chr1 | 61780033 | 61780221 |
| chr1 | 61903317 | 61903514 |
| chr1 | 61991619 | 61991774 |
| chr1 | 62085971 | 62086156 |
| chr1 | 62086156 | 62086348 |
| chr1 | 62175073 | 62175365 |
| chr1 | 62444524 | 62444674 |
| chr1 | 62466674 | 62466872 |
| chr1 | 62539876 | 62540169 |
| chr1 | 62551331 | 62552046 |
| chr1 | 62591702 | 62591889 |
| chr1 | 62591889 | 62592084 |
| chr1 | 62697037 | 62697264 |
| chr1 | 62701092 | 62701375 |
| chr1 | 62703002 | 62703793 |
| chr1 | 62706019 | 62706644 |
| chr1 | 62706644 | 62707068 |
| chr1 | 62720041 | 62720590 |
| chr1 | 62721736 | 62722338 |
| chr1 | 62724441 | 62724609 |
| chr1 | 62727285 | 62727448 |
| chr1 | 62734212 | 62734392 |
| chr1 | 62734434 | 62734854 |
| chr1 | 62736495 | 62736875 |
| chr1 | 62738166 | 62738532 |
| chr1 | 62740285 | 62740530 |
| chr1 | 62747405 | 62747746 |
| chr1 | 62747746 | 62748147 |
| chr1 | 62748304 | 62748456 |
| chr1 | 62750453 | 62750919 |
| chr1 | 62751440 | 62751627 |
| chr1 | 62763828 | 62764153 |
| chr1 | 62765518 | 62765721 |



|      |          |          |
|------|----------|----------|
| chr1 | 62767618 | 62768228 |
| chr1 | 62772124 | 62772343 |
| chr1 | 62777223 | 62777615 |
| chr1 | 62777615 | 62777944 |
| chr1 | 62777944 | 62778177 |
| chr1 | 62782736 | 62782937 |
| chr1 | 62783327 | 62783829 |
| chr1 | 62796402 | 62796572 |
| chr1 | 62835279 | 62835512 |
| chr1 | 62843249 | 62843531 |
| chr1 | 62904690 | 62904905 |
| chr1 | 62929571 | 62929811 |
| chr1 | 62933388 | 62933546 |
| chr1 | 62964333 | 62964630 |
| chr1 | 62982802 | 62982993 |
| chr1 | 62984520 | 62984761 |
| chr1 | 62986413 | 62986578 |
| chr1 | 62987712 | 62987891 |
| chr1 | 63051015 | 63051282 |
| chr1 | 63088209 | 63088398 |
| chr1 | 63088703 | 63088871 |
| chr1 | 63098942 | 63099117 |
| chr1 | 63112877 | 63113221 |
| chr1 | 63113384 | 63113629 |
| chr1 | 63113629 | 63113904 |
| chr1 | 63113904 | 63114250 |
| chr1 | 63114250 | 63114564 |
| chr1 | 63114564 | 63114858 |
| chr1 | 63129966 | 63130145 |
| chr1 | 63134463 | 63135087 |
| chr1 | 63135425 | 63135695 |
| chr1 | 63176313 | 63176550 |
| chr1 | 63176552 | 63176941 |
| chr1 | 63176941 | 63177222 |
| chr1 | 63177222 | 63177456 |
| chr1 | 63180590 | 63180763 |
| chr1 | 63180763 | 63180954 |
| chr1 | 63181012 | 63181392 |
| chr1 | 63181557 | 63181729 |
| chr1 | 63186373 | 63186540 |
| chr1 | 63203992 | 63204203 |
| chr1 | 63204355 | 63204547 |

|      |          |          |
|------|----------|----------|
| chr1 | 63273168 | 63273328 |
| chr1 | 63273533 | 63273743 |
| chr1 | 63323738 | 63323948 |
| chr1 | 63446120 | 63446445 |
| chr1 | 63491092 | 63491298 |
| chr1 | 63529356 | 63529537 |
| chr1 | 63567099 | 63567426 |
| chr1 | 63629789 | 63629965 |
| chr1 | 63629965 | 63630299 |
| chr1 | 63630299 | 63630694 |
| chr1 | 63630694 | 63630950 |
| chr1 | 63658084 | 63658344 |
| chr1 | 63659695 | 63659914 |
| chr1 | 63668870 | 63669129 |
| chr1 | 63696538 | 63696898 |
| chr1 | 63729943 | 63730208 |
| chr1 | 63730234 | 63730465 |
| chr1 | 63730486 | 63730833 |
| chr1 | 63732645 | 63732883 |
| chr1 | 63756068 | 63756230 |
| chr1 | 63763193 | 63763375 |
| chr1 | 63763375 | 63763561 |
| chr1 | 63766478 | 63766777 |
| chr1 | 63776365 | 63776762 |
| chr1 | 63776840 | 63777281 |
| chr1 | 63777281 | 63777591 |
| chr1 | 63849921 | 63850220 |
| chr1 | 63850220 | 63850544 |
| chr1 | 63916862 | 63917212 |
| chr1 | 63917297 | 63917678 |
| chr1 | 63919896 | 63920316 |
| chr1 | 63928477 | 63928686 |
| chr1 | 63953549 | 63953837 |
| chr1 | 63956590 | 63956740 |
| chr1 | 63967870 | 63968202 |
| chr1 | 63976857 | 63977280 |
| chr1 | 63992763 | 63992948 |
| chr1 | 63995107 | 63995259 |
| chr1 | 63995294 | 63995457 |
| chr1 | 63995856 | 63996173 |
| chr1 | 63996173 | 63996411 |
| chr1 | 63998226 | 63998386 |

|      |          |          |
|------|----------|----------|
| chr1 | 63998801 | 63999226 |
| chr1 | 64005059 | 64005706 |
| chr1 | 64005786 | 64005979 |
| chr1 | 64005979 | 64006207 |
| chr1 | 64023534 | 64023732 |
| chr1 | 64036972 | 64037443 |
| chr1 | 64053617 | 64053877 |
| chr1 | 64077269 | 64077614 |
| chr1 | 64077614 | 64077909 |
| chr1 | 64078368 | 64078675 |
| chr1 | 64081848 | 64082109 |
| chr1 | 64087972 | 64088257 |
| chr1 | 64088257 | 64088895 |
| chr1 | 64089014 | 64089318 |
| chr1 | 64102207 | 64102684 |
| chr1 | 64105334 | 64105732 |
| chr1 | 64118773 | 64119187 |
| chr1 | 64121170 | 64121511 |
| chr1 | 64121511 | 64122015 |
| chr1 | 64122015 | 64122497 |
| chr1 | 64128498 | 64128686 |
| chr1 | 64187875 | 64188532 |
| chr1 | 64191603 | 64191885 |
| chr1 | 64197181 | 64197642 |
| chr1 | 64197642 | 64198035 |
| chr1 | 64198346 | 64198584 |
| chr1 | 64208930 | 64209645 |
| chr1 | 64211076 | 64211328 |
| chr1 | 64211328 | 64211630 |
| chr1 | 64225802 | 64226087 |
| chr1 | 64226087 | 64226464 |
| chr1 | 64226464 | 64226791 |
| chr1 | 64252696 | 64252851 |
| chr1 | 64287153 | 64287389 |
| chr1 | 64298204 | 64298391 |
| chr1 | 64301177 | 64301676 |
| chr1 | 64305360 | 64305640 |
| chr1 | 64305640 | 64305981 |
| chr1 | 64316583 | 64316738 |
| chr1 | 64316763 | 64317087 |
| chr1 | 64317087 | 64317509 |
| chr1 | 64319276 | 64319438 |

|      |          |          |
|------|----------|----------|
| chr1 | 64319555 | 64319807 |
| chr1 | 64324100 | 64324305 |
| chr1 | 64337062 | 64337265 |
| chr1 | 64337730 | 64337954 |
| chr1 | 64337954 | 64338442 |
| chr1 | 64338487 | 64339003 |
| chr1 | 64347623 | 64347911 |
| chr1 | 64353501 | 64353673 |
| chr1 | 64355320 | 64355570 |
| chr1 | 64373966 | 64374448 |
| chr1 | 64374710 | 64375092 |
| chr1 | 64435237 | 64435399 |
| chr1 | 64446080 | 64446356 |
| chr1 | 64448167 | 64448325 |
| chr1 | 64451469 | 64451674 |
| chr1 | 64484513 | 64484778 |
| chr1 | 64494649 | 64494853 |
| chr1 | 64532035 | 64532324 |
| chr1 | 64532324 | 64532657 |
| chr1 | 64532657 | 64533357 |
| chr1 | 64539090 | 64539311 |
| chr1 | 64546134 | 64546348 |
| chr1 | 64551983 | 64552295 |
| chr1 | 64600511 | 64600718 |
| chr1 | 64600718 | 64601008 |
| chr1 | 64601309 | 64601566 |
| chr1 | 64601566 | 64601859 |
| chr1 | 64601868 | 64602041 |
| chr1 | 64608180 | 64608586 |
| chr1 | 64611097 | 64611328 |
| chr1 | 64616699 | 64616863 |
| chr1 | 64616863 | 64617097 |
| chr1 | 64617097 | 64617386 |
| chr1 | 64617386 | 64617658 |
| chr1 | 64617658 | 64617934 |
| chr1 | 64623740 | 64624318 |
| chr1 | 64640226 | 64640580 |
| chr1 | 64649448 | 64649656 |
| chr1 | 64656437 | 64656753 |
| chr1 | 64669486 | 64669748 |
| chr1 | 64673980 | 64674366 |
| chr1 | 64690284 | 64690589 |

|      |          |          |
|------|----------|----------|
| chr1 | 64690589 | 64691108 |
| chr1 | 64691108 | 64691546 |
| chr1 | 64705304 | 64705562 |
| chr1 | 64709963 | 64710146 |
| chr1 | 64715424 | 64715798 |
| chr1 | 64717594 | 64717838 |
| chr1 | 64718063 | 64718357 |
| chr1 | 64734858 | 64735014 |
| chr1 | 64736132 | 64736584 |
| chr1 | 64736992 | 64737403 |
| chr1 | 64737403 | 64737817 |
| chr1 | 64737817 | 64738131 |
| chr1 | 64738161 | 64738477 |
| chr1 | 64775091 | 64775406 |
| chr1 | 64782293 | 64782546 |
| chr1 | 64787499 | 64788145 |
| chr1 | 64790872 | 64791024 |
| chr1 | 64795329 | 64795665 |
| chr1 | 64795665 | 64796085 |
| chr1 | 64796847 | 64797196 |
| chr1 | 64797196 | 64797591 |
| chr1 | 64797591 | 64797886 |
| chr1 | 64807242 | 64807462 |
| chr1 | 64808967 | 64809554 |
| chr1 | 64826333 | 64826762 |
| chr1 | 64842811 | 64843038 |
| chr1 | 64852286 | 64852519 |
| chr1 | 64853810 | 64854296 |
| chr1 | 64855456 | 64855824 |
| chr1 | 64859856 | 64860246 |
| chr1 | 64860614 | 64860994 |
| chr1 | 64868725 | 64868913 |
| chr1 | 64875698 | 64875848 |
| chr1 | 64876351 | 64876628 |
| chr1 | 64889735 | 64890025 |
| chr1 | 64907847 | 64908091 |
| chr1 | 64908988 | 64909225 |
| chr1 | 64919075 | 64919230 |
| chr1 | 64929124 | 64929371 |
| chr1 | 64929792 | 64929949 |
| chr1 | 64932975 | 64933327 |
| chr1 | 64941846 | 64942402 |

|      |          |          |
|------|----------|----------|
| chr1 | 64942402 | 64942894 |
| chr1 | 64949138 | 64949500 |
| chr1 | 64949500 | 64949756 |
| chr1 | 64950074 | 64950313 |
| chr1 | 64950372 | 64950686 |
| chr1 | 64956415 | 64957079 |
| chr1 | 64957100 | 64957271 |
| chr1 | 64970720 | 64971032 |
| chr1 | 64986100 | 64986481 |
| chr1 | 64988371 | 64988540 |
| chr1 | 65001561 | 65001793 |
| chr1 | 65010173 | 65010499 |
| chr1 | 65112098 | 65112329 |
| chr1 | 65117987 | 65118260 |
| chr1 | 65118260 | 65118501 |
| chr1 | 65118563 | 65118836 |
| chr1 | 65129757 | 65129920 |
| chr1 | 65130320 | 65130490 |
| chr1 | 65154803 | 65155171 |
| chr1 | 65178096 | 65178605 |
| chr1 | 65178605 | 65178968 |
| chr1 | 65178968 | 65179519 |
| chr1 | 65186206 | 65187220 |
| chr1 | 65245675 | 65246001 |
| chr1 | 65246001 | 65246234 |
| chr1 | 65282841 | 65283051 |
| chr1 | 65311660 | 65311810 |
| chr1 | 65312996 | 65313189 |
| chr1 | 65337803 | 65338308 |
| chr1 | 65342496 | 65342679 |
| chr1 | 65353065 | 65353342 |
| chr1 | 65354140 | 65354635 |
| chr1 | 65354667 | 65354906 |
| chr1 | 65357611 | 65357777 |
| chr1 | 65362062 | 65362284 |
| chr1 | 65388449 | 65388607 |
| chr1 | 65389401 | 65389573 |
| chr1 | 65389620 | 65390073 |
| chr1 | 65390073 | 65390465 |
| chr1 | 65407315 | 65407558 |
| chr1 | 65407558 | 65407838 |
| chr1 | 65422479 | 65422710 |

|      |          |          |
|------|----------|----------|
| chr1 | 65422710 | 65422989 |
| chr1 | 65423404 | 65423614 |
| chr1 | 65440134 | 65440762 |
| chr1 | 65470134 | 65470416 |
| chr1 | 65574960 | 65575207 |
| chr1 | 65619280 | 65619469 |
| chr1 | 65625912 | 65626117 |
| chr1 | 65667830 | 65667989 |
| chr1 | 65808618 | 65808996 |
| chr1 | 65829089 | 65829278 |
| chr1 | 65847135 | 65847315 |
| chr1 | 65932110 | 65932418 |
| chr1 | 65932418 | 65932899 |
| chr1 | 65933000 | 65933263 |
| chr1 | 65933389 | 65933553 |
| chr1 | 66098828 | 66098986 |
| chr1 | 66108109 | 66108355 |
| chr1 | 66128449 | 66128698 |
| chr1 | 66133084 | 66133400 |
| chr1 | 66145158 | 66145523 |
| chr1 | 66147282 | 66147434 |
| chr1 | 66168758 | 66169217 |
| chr1 | 66174938 | 66175378 |
| chr1 | 66175378 | 66175749 |
| chr1 | 66244867 | 66245369 |
| chr1 | 66257708 | 66257916 |
| chr1 | 66280498 | 66281056 |
| chr1 | 66302492 | 66302719 |
| chr1 | 66311687 | 66311936 |
| chr1 | 66467908 | 66468329 |
| chr1 | 66585933 | 66586255 |
| chr1 | 66617251 | 66617477 |
| chr1 | 66649571 | 66649919 |
| chr1 | 66650109 | 66650339 |
| chr1 | 66655210 | 66655398 |
| chr1 | 66700617 | 66700966 |
| chr1 | 66700966 | 66701544 |
| chr1 | 66815981 | 66816314 |
| chr1 | 66816445 | 66816742 |
| chr1 | 66816742 | 66817018 |
| chr1 | 66817030 | 66817251 |
| chr1 | 66817251 | 66817466 |

|      |          |          |
|------|----------|----------|
| chr1 | 66817466 | 66817648 |
| chr1 | 66817648 | 66817836 |
| chr1 | 66817836 | 66818056 |
| chr1 | 66828566 | 66828736 |
| chr1 | 66838581 | 66838758 |
| chr1 | 66845706 | 66846274 |
| chr1 | 66846274 | 66846588 |
| chr1 | 66861933 | 66862087 |
| chr1 | 66862656 | 66863105 |
| chr1 | 66863105 | 66863544 |
| chr1 | 66881838 | 66882064 |
| chr1 | 66884393 | 66884573 |
| chr1 | 66895407 | 66895623 |
| chr1 | 66895755 | 66896061 |
| chr1 | 66896157 | 66896445 |
| chr1 | 66901042 | 66901263 |
| chr1 | 66996716 | 66997284 |
| chr1 | 66997911 | 66998135 |
| chr1 | 67003705 | 67004002 |
| chr1 | 67038377 | 67038681 |
| chr1 | 67038681 | 67039071 |
| chr1 | 67061498 | 67061770 |
| chr1 | 67246727 | 67246882 |
| chr1 | 67288081 | 67288241 |
| chr1 | 67450857 | 67451195 |
| chr1 | 67496967 | 67497161 |
| chr1 | 67692141 | 67692337 |
| chr1 | 68501592 | 68501835 |
| chr1 | 68720651 | 68720948 |
| chr1 | 68720948 | 68721264 |
| chr1 | 68743483 | 68743769 |
| chr1 | 68756022 | 68756218 |
| chr1 | 68780142 | 68780327 |
| chr1 | 69106559 | 69106784 |
| chr1 | 69106877 | 69107296 |
| chr1 | 69165294 | 69165530 |
| chr1 | 69210169 | 69210590 |
| chr1 | 69241867 | 69242277 |
| chr1 | 69275913 | 69276109 |
| chr1 | 69276994 | 69277183 |
| chr1 | 69277183 | 69277427 |
| chr1 | 69277427 | 69277801 |



|      |          |          |
|------|----------|----------|
| chr1 | 69277801 | 69278110 |
| chr1 | 69285231 | 69285572 |
| chr1 | 69286311 | 69286768 |
| chr1 | 69331711 | 69331976 |
| chr1 | 69367583 | 69367950 |
| chr1 | 69368052 | 69368367 |
| chr1 | 69368744 | 69368926 |
| chr1 | 69369321 | 69370052 |
| chr1 | 69370052 | 69370386 |
| chr1 | 69379765 | 69380069 |
| chr1 | 69397733 | 69397991 |
| chr1 | 69398690 | 69398990 |
| chr1 | 69401383 | 69401826 |
| chr1 | 69427508 | 69427759 |
| chr1 | 69427759 | 69428226 |
| chr1 | 69433568 | 69433999 |
| chr1 | 69433999 | 69434500 |
| chr1 | 69440638 | 69440912 |
| chr1 | 69440912 | 69441407 |
| chr1 | 69444517 | 69444765 |
| chr1 | 69450507 | 69450833 |
| chr1 | 69452919 | 69453242 |
| chr1 | 69453242 | 69453519 |
| chr1 | 69456734 | 69456913 |
| chr1 | 69460782 | 69461116 |
| chr1 | 69461116 | 69461566 |
| chr1 | 69467911 | 69468336 |
| chr1 | 69469201 | 69469439 |
| chr1 | 69470916 | 69471227 |
| chr1 | 69504888 | 69505073 |
| chr1 | 69507742 | 69507958 |
| chr1 | 69508321 | 69508562 |
| chr1 | 69585301 | 69585548 |
| chr1 | 69589870 | 69590081 |
| chr1 | 69609970 | 69610261 |
| chr1 | 69610261 | 69610702 |
| chr1 | 69610702 | 69611209 |
| chr1 | 69611209 | 69611645 |
| chr1 | 69655467 | 69655753 |
| chr1 | 69655850 | 69656116 |
| chr1 | 69657013 | 69657190 |
| chr1 | 69657999 | 69658523 |

|      |          |          |
|------|----------|----------|
| chr1 | 69658593 | 69658815 |
| chr1 | 69686100 | 69686286 |
| chr1 | 69686723 | 69686880 |
| chr1 | 69686969 | 69687417 |
| chr1 | 69687417 | 69688049 |
| chr1 | 69688301 | 69688486 |
| chr1 | 69689041 | 69689343 |
| chr1 | 69728011 | 69728322 |
| chr1 | 69752075 | 69752226 |
| chr1 | 69775704 | 69775856 |
| chr1 | 69833557 | 69833888 |
| chr1 | 70077894 | 70078284 |
| chr1 | 70078848 | 70079215 |
| chr1 | 70082278 | 70082540 |
| chr1 | 70082648 | 70082972 |
| chr1 | 70115298 | 70115471 |
| chr1 | 70135510 | 70135777 |
| chr1 | 70164337 | 70164579 |
| chr1 | 70339607 | 70339849 |
| chr1 | 70504663 | 70504850 |
| chr1 | 70523242 | 70523425 |
| chr1 | 70621634 | 70622179 |
| chr1 | 70622179 | 70622401 |
| chr1 | 70665433 | 70665593 |
| chr1 | 70698175 | 70698390 |
| chr1 | 70725635 | 70725895 |
| chr1 | 70776639 | 70776943 |
| chr1 | 70776989 | 70777450 |
| chr1 | 70777520 | 70777693 |
| chr1 | 70795177 | 70795432 |
| chr1 | 70821323 | 70821635 |
| chr1 | 70821635 | 70822115 |
| chr1 | 70846885 | 70847173 |
| chr1 | 70884249 | 70884443 |
| chr1 | 70885534 | 70885724 |
| chr1 | 70916876 | 70917145 |
| chr1 | 70918240 | 70918673 |
| chr1 | 70918673 | 70918919 |
| chr1 | 70926174 | 70926509 |
| chr1 | 70936485 | 70936645 |
| chr1 | 70937809 | 70938210 |
| chr1 | 70959854 | 70960012 |

|      |          |          |
|------|----------|----------|
| chr1 | 71000325 | 71000847 |
| chr1 | 71003752 | 71003984 |
| chr1 | 71004138 | 71004662 |
| chr1 | 71004768 | 71004971 |
| chr1 | 71014118 | 71014416 |
| chr1 | 71014450 | 71014664 |
| chr1 | 71018731 | 71018978 |
| chr1 | 71019536 | 71019869 |
| chr1 | 71024531 | 71024835 |
| chr1 | 71030580 | 71030801 |
| chr1 | 71037069 | 71037278 |
| chr1 | 71056197 | 71056534 |
| chr1 | 71079274 | 71079482 |
| chr1 | 71095252 | 71095609 |
| chr1 | 71102246 | 71102799 |
| chr1 | 71102799 | 71103367 |
| chr1 | 71219119 | 71219318 |
| chr1 | 71289606 | 71289817 |
| chr1 | 71310699 | 71310891 |
| chr1 | 71323349 | 71323499 |
| chr1 | 71339320 | 71339536 |
| chr1 | 71366454 | 71366771 |
| chr1 | 71395997 | 71396464 |
| chr1 | 71396480 | 71396668 |
| chr1 | 71402165 | 71402360 |
| chr1 | 71413069 | 71413387 |
| chr1 | 71413387 | 71413698 |
| chr1 | 71414875 | 71415120 |
| chr1 | 71432427 | 71432579 |
| chr1 | 71458045 | 71458308 |
| chr1 | 71460695 | 71461342 |
| chr1 | 71478598 | 71479021 |
| chr1 | 71479143 | 71479315 |
| chr1 | 71531669 | 71532004 |
| chr1 | 71546521 | 71546696 |
| chr1 | 71556765 | 71557290 |
| chr1 | 71557290 | 71557689 |
| chr1 | 71567931 | 71568162 |
| chr1 | 71575781 | 71575992 |
| chr1 | 71576172 | 71576419 |
| chr1 | 71580482 | 71580791 |
| chr1 | 71582532 | 71582801 |

|      |          |          |
|------|----------|----------|
| chr1 | 71582937 | 71583180 |
| chr1 | 71583206 | 71583454 |
| chr1 | 71583454 | 71583693 |
| chr1 | 71586775 | 71586978 |
| chr1 | 71589583 | 71589788 |
| chr1 | 71590861 | 71591018 |
| chr1 | 71593054 | 71593204 |
| chr1 | 71597428 | 71597578 |
| chr1 | 71601087 | 71601347 |
| chr1 | 71610002 | 71610219 |
| chr1 | 71625835 | 71626004 |
| chr1 | 71626068 | 71626246 |
| chr1 | 71629580 | 71629776 |
| chr1 | 71638126 | 71638389 |
| chr1 | 71638425 | 71638575 |
| chr1 | 71639101 | 71639333 |
| chr1 | 71641817 | 71641988 |
| chr1 | 71642962 | 71643139 |
| chr1 | 71643301 | 71643661 |
| chr1 | 71652582 | 71653046 |
| chr1 | 71653046 | 71653949 |
| chr1 | 71667204 | 71667855 |
| chr1 | 71691599 | 71691879 |
| chr1 | 71691879 | 71692185 |
| chr1 | 71723409 | 71723741 |
| chr1 | 71723823 | 71724262 |
| chr1 | 71752315 | 71752740 |
| chr1 | 71755432 | 71755805 |
| chr1 | 71756200 | 71756560 |
| chr1 | 71756656 | 71756902 |
| chr1 | 71763575 | 71764012 |
| chr1 | 71814391 | 71814669 |
| chr1 | 71830426 | 71830694 |
| chr1 | 71837121 | 71837338 |
| chr1 | 71837338 | 71837641 |
| chr1 | 71851116 | 71851784 |
| chr1 | 71865487 | 71866055 |
| chr1 | 71880399 | 71880958 |
| chr1 | 71886994 | 71887189 |
| chr1 | 71887784 | 71888302 |
| chr1 | 71893288 | 71893603 |
| chr1 | 71893603 | 71894033 |

|      |          |          |
|------|----------|----------|
| chr1 | 71894033 | 71894300 |
| chr1 | 71895817 | 71896092 |
| chr1 | 71912450 | 71912671 |
| chr1 | 71912673 | 71912837 |
| chr1 | 71919030 | 71919414 |
| chr1 | 71919871 | 71920301 |
| chr1 | 71921252 | 71921427 |
| chr1 | 71923767 | 71924083 |
| chr1 | 71936647 | 71937019 |
| chr1 | 71945125 | 71945487 |
| chr1 | 71948676 | 71949088 |
| chr1 | 71952643 | 71952795 |
| chr1 | 71963499 | 71963667 |
| chr1 | 71970313 | 71970885 |
| chr1 | 71977323 | 71977743 |
| chr1 | 71983856 | 71984088 |
| chr1 | 72002563 | 72002746 |
| chr1 | 72013915 | 72014263 |
| chr1 | 72022622 | 72022936 |
| chr1 | 72069208 | 72069395 |
| chr1 | 72070473 | 72070976 |
| chr1 | 72075566 | 72075943 |
| chr1 | 72076103 | 72076841 |
| chr1 | 72079030 | 72079473 |
| chr1 | 72079661 | 72079880 |
| chr1 | 72083218 | 72083532 |
| chr1 | 72084974 | 72085248 |
| chr1 | 72099101 | 72099516 |
| chr1 | 72099516 | 72100023 |
| chr1 | 72105366 | 72105956 |
| chr1 | 72106304 | 72106607 |
| chr1 | 72107231 | 72107403 |
| chr1 | 72114395 | 72114594 |
| chr1 | 72123506 | 72123732 |
| chr1 | 72123732 | 72123983 |
| chr1 | 72141939 | 72142175 |
| chr1 | 72144406 | 72144974 |
| chr1 | 72172835 | 72173216 |
| chr1 | 72173352 | 72174028 |
| chr1 | 72182510 | 72182714 |
| chr1 | 72182921 | 72183268 |
| chr1 | 72183268 | 72183549 |

|      |          |          |
|------|----------|----------|
| chr1 | 72186317 | 72186485 |
| chr1 | 72197184 | 72197334 |
| chr1 | 72198781 | 72198938 |
| chr1 | 72202743 | 72202961 |
| chr1 | 72211759 | 72212214 |
| chr1 | 72212214 | 72212483 |
| chr1 | 72220070 | 72220301 |
| chr1 | 72225856 | 72226105 |
| chr1 | 72226155 | 72226477 |
| chr1 | 72226477 | 72226668 |
| chr1 | 72226668 | 72226980 |
| chr1 | 72226980 | 72227452 |
| chr1 | 72227580 | 72227981 |
| chr1 | 72236360 | 72236597 |
| chr1 | 72236597 | 72236828 |
| chr1 | 72236861 | 72237307 |
| chr1 | 72237307 | 72237708 |
| chr1 | 72237708 | 72238044 |
| chr1 | 72238044 | 72238359 |
| chr1 | 72242711 | 72242901 |
| chr1 | 72243684 | 72244088 |
| chr1 | 72244129 | 72244614 |
| chr1 | 72244614 | 72245281 |
| chr1 | 72254654 | 72254871 |
| chr1 | 72254924 | 72255370 |
| chr1 | 72255370 | 72255867 |
| chr1 | 72255867 | 72256360 |
| chr1 | 72256480 | 72256771 |
| chr1 | 72283933 | 72284525 |
| chr1 | 72306944 | 72307226 |
| chr1 | 72307226 | 72307835 |
| chr1 | 72309813 | 72310071 |
| chr1 | 72352588 | 72352811 |
| chr1 | 72352894 | 72353108 |
| chr1 | 72371662 | 72371856 |
| chr1 | 72371983 | 72372366 |
| chr1 | 72372456 | 72372705 |
| chr1 | 72372705 | 72372955 |
| chr1 | 72379627 | 72379796 |
| chr1 | 72379796 | 72379964 |
| chr1 | 72399713 | 72400085 |
| chr1 | 72400085 | 72400364 |

|      |          |          |
|------|----------|----------|
| chr1 | 72400443 | 72400606 |
| chr1 | 72405581 | 72405770 |
| chr1 | 72420416 | 72420641 |
| chr1 | 72428535 | 72428983 |
| chr1 | 72428983 | 72429567 |
| chr1 | 72449448 | 72449713 |
| chr1 | 72449757 | 72450061 |
| chr1 | 72450061 | 72450316 |
| chr1 | 72450316 | 72450551 |
| chr1 | 72450551 | 72450758 |
| chr1 | 72450817 | 72451061 |
| chr1 | 72456906 | 72457158 |
| chr1 | 72457158 | 72457379 |
| chr1 | 72457379 | 72457665 |
| chr1 | 72464908 | 72465311 |
| chr1 | 72465311 | 72465555 |
| chr1 | 72466085 | 72466639 |
| chr1 | 72476635 | 72476956 |
| chr1 | 72509430 | 72509606 |
| chr1 | 72509622 | 72510095 |
| chr1 | 72511193 | 72511402 |
| chr1 | 72513948 | 72514099 |
| chr1 | 72536655 | 72536954 |
| chr1 | 72536954 | 72537314 |
| chr1 | 72538379 | 72538625 |
| chr1 | 72550374 | 72550663 |
| chr1 | 72551013 | 72551182 |
| chr1 | 72556510 | 72556816 |
| chr1 | 72564408 | 72564981 |
| chr1 | 72582958 | 72583372 |
| chr1 | 72583372 | 72583821 |
| chr1 | 72593516 | 72593763 |
| chr1 | 72599216 | 72599569 |
| chr1 | 72599569 | 72600156 |
| chr1 | 72601276 | 72601506 |
| chr1 | 72602238 | 72602535 |
| chr1 | 72609235 | 72609489 |
| chr1 | 72676519 | 72676721 |
| chr1 | 72710740 | 72711084 |
| chr1 | 72711084 | 72711357 |
| chr1 | 72711357 | 72711580 |
| chr1 | 72711580 | 72711894 |

|      |          |          |
|------|----------|----------|
| chr1 | 72716614 | 72716767 |
| chr1 | 72717036 | 72717279 |
| chr1 | 72718890 | 72719237 |
| chr1 | 72798592 | 72798754 |
| chr1 | 72824734 | 72824884 |
| chr1 | 72854972 | 72855237 |
| chr1 | 72865886 | 72866042 |
| chr1 | 72870228 | 72870503 |
| chr1 | 72871065 | 72871344 |
| chr1 | 72871913 | 72872063 |
| chr1 | 72872609 | 72872765 |
| chr1 | 72873822 | 72874010 |
| chr1 | 72877904 | 72878101 |
| chr1 | 72963387 | 72963856 |
| chr1 | 73007631 | 73007797 |
| chr1 | 73026865 | 73027266 |
| chr1 | 73027293 | 73027779 |
| chr1 | 73027830 | 73028126 |
| chr1 | 73032568 | 73032848 |
| chr1 | 73043630 | 73043871 |
| chr1 | 73046843 | 73047094 |
| chr1 | 73051471 | 73051964 |
| chr1 | 73123107 | 73123326 |
| chr1 | 73213051 | 73213206 |
| chr1 | 73235241 | 73235608 |
| chr1 | 73257338 | 73257582 |
| chr1 | 73270771 | 73271062 |
| chr1 | 73826372 | 73826623 |
| chr1 | 73853488 | 73853656 |
| chr1 | 73862775 | 73863081 |
| chr1 | 73883440 | 73883752 |
| chr1 | 73901397 | 73901587 |
| chr1 | 73901587 | 73902035 |
| chr1 | 73902175 | 73902391 |
| chr1 | 73902391 | 73902643 |
| chr1 | 73907056 | 73907631 |
| chr1 | 73926340 | 73926662 |
| chr1 | 73928399 | 73928762 |
| chr1 | 73935769 | 73935998 |
| chr1 | 73936064 | 73936333 |
| chr1 | 73936510 | 73937199 |
| chr1 | 73947378 | 73947944 |



|      |          |          |
|------|----------|----------|
| chr1 | 73954542 | 73955140 |
| chr1 | 73955333 | 73956048 |
| chr1 | 73958153 | 73958555 |
| chr1 | 73962694 | 73963016 |
| chr1 | 73963016 | 73963582 |
| chr1 | 73968600 | 73968833 |
| chr1 | 73986828 | 73987011 |
| chr1 | 73987822 | 73988158 |
| chr1 | 73991001 | 73991256 |
| chr1 | 73996252 | 73996572 |
| chr1 | 73998072 | 73998369 |
| chr1 | 73998369 | 73998846 |
| chr1 | 73998933 | 73999113 |
| chr1 | 73999113 | 73999347 |
| chr1 | 74007983 | 74008137 |
| chr1 | 74008226 | 74008536 |
| chr1 | 74008536 | 74008979 |
| chr1 | 74008979 | 74009314 |
| chr1 | 74015845 | 74016145 |
| chr1 | 74027545 | 74028006 |
| chr1 | 74028626 | 74029206 |
| chr1 | 74036575 | 74037407 |
| chr1 | 74042366 | 74042789 |
| chr1 | 74042789 | 74043136 |
| chr1 | 74043807 | 74043957 |
| chr1 | 74054034 | 74054365 |
| chr1 | 74058427 | 74058750 |
| chr1 | 74063907 | 74064063 |
| chr1 | 74066086 | 74066272 |
| chr1 | 74069185 | 74069378 |
| chr1 | 74069390 | 74069848 |
| chr1 | 74070078 | 74070542 |
| chr1 | 74076262 | 74076671 |
| chr1 | 74077441 | 74077688 |
| chr1 | 74081601 | 74081766 |
| chr1 | 74082915 | 74083159 |
| chr1 | 74084470 | 74084746 |
| chr1 | 74084748 | 74085116 |
| chr1 | 74092332 | 74092719 |
| chr1 | 74095739 | 74096105 |
| chr1 | 74098123 | 74098479 |
| chr1 | 74098479 | 74098856 |

|      |          |          |
|------|----------|----------|
| chr1 | 74098856 | 74099117 |
| chr1 | 74102774 | 74102937 |
| chr1 | 74121901 | 74122198 |
| chr1 | 74122198 | 74122594 |
| chr1 | 74124366 | 74124739 |
| chr1 | 74124739 | 74124990 |
| chr1 | 74125044 | 74125638 |
| chr1 | 74126412 | 74126588 |
| chr1 | 74132111 | 74132267 |
| chr1 | 74147909 | 74148119 |
| chr1 | 74149107 | 74149720 |
| chr1 | 74155207 | 74155577 |
| chr1 | 74155577 | 74156002 |
| chr1 | 74162134 | 74162842 |
| chr1 | 74182282 | 74182529 |
| chr1 | 74196058 | 74196284 |
| chr1 | 74227248 | 74227626 |
| chr1 | 74236066 | 74236216 |
| chr1 | 74236243 | 74236449 |
| chr1 | 74236449 | 74236812 |
| chr1 | 74236812 | 74237222 |
| chr1 | 74239244 | 74239407 |
| chr1 | 74239753 | 74239944 |
| chr1 | 74240157 | 74240432 |
| chr1 | 74248805 | 74249188 |
| chr1 | 74249277 | 74249653 |
| chr1 | 74249653 | 74249907 |
| chr1 | 74270063 | 74270235 |
| chr1 | 74271687 | 74271951 |
| chr1 | 74275187 | 74275517 |
| chr1 | 74276658 | 74276825 |
| chr1 | 74276925 | 74277204 |
| chr1 | 74277952 | 74278224 |
| chr1 | 74279335 | 74279510 |
| chr1 | 74284155 | 74284537 |
| chr1 | 74284539 | 74285159 |
| chr1 | 74287239 | 74287476 |
| chr1 | 74295083 | 74295451 |
| chr1 | 74295451 | 74295799 |
| chr1 | 74295799 | 74296129 |
| chr1 | 74296479 | 74296637 |
| chr1 | 74297229 | 74297706 |

|      |          |          |
|------|----------|----------|
| chr1 | 74300512 | 74300851 |
| chr1 | 74303539 | 74303851 |
| chr1 | 74303851 | 74304066 |
| chr1 | 74304066 | 74304307 |
| chr1 | 74304307 | 74304526 |
| chr1 | 74313338 | 74313677 |
| chr1 | 74332237 | 74332902 |
| chr1 | 74340530 | 74340874 |
| chr1 | 74340874 | 74341204 |
| chr1 | 74351396 | 74351587 |
| chr1 | 74352587 | 74353045 |
| chr1 | 74361271 | 74361421 |
| chr1 | 74361817 | 74362284 |
| chr1 | 74367043 | 74367306 |
| chr1 | 74381362 | 74381755 |
| chr1 | 74386624 | 74387041 |
| chr1 | 74387041 | 74387362 |
| chr1 | 74391282 | 74391783 |
| chr1 | 74391789 | 74392176 |
| chr1 | 74392176 | 74392413 |
| chr1 | 74397035 | 74397478 |
| chr1 | 74397478 | 74397770 |
| chr1 | 74397770 | 74398063 |
| chr1 | 74411819 | 74412250 |
| chr1 | 74415088 | 74415560 |
| chr1 | 74431997 | 74432271 |
| chr1 | 74432271 | 74432568 |
| chr1 | 74433207 | 74433475 |
| chr1 | 74434620 | 74434977 |
| chr1 | 74438066 | 74438501 |
| chr1 | 74452555 | 74452827 |
| chr1 | 74452827 | 74453053 |
| chr1 | 74460365 | 74460515 |
| chr1 | 74492688 | 74493010 |
| chr1 | 74496596 | 74496813 |
| chr1 | 74505438 | 74505715 |
| chr1 | 74505715 | 74506107 |
| chr1 | 74506107 | 74506526 |
| chr1 | 74506526 | 74506867 |
| chr1 | 74506965 | 74507115 |
| chr1 | 74537851 | 74538043 |
| chr1 | 74551239 | 74551473 |

|      |          |          |
|------|----------|----------|
| chr1 | 74570081 | 74570411 |
| chr1 | 74578883 | 74579615 |
| chr1 | 74579773 | 74579959 |
| chr1 | 74587439 | 74587689 |
| chr1 | 74587689 | 74588045 |
| chr1 | 74588045 | 74588557 |
| chr1 | 74600878 | 74601068 |
| chr1 | 74601068 | 74601299 |
| chr1 | 74601299 | 74601570 |
| chr1 | 74601570 | 74601890 |
| chr1 | 74610460 | 74610745 |
| chr1 | 74610745 | 74610997 |
| chr1 | 74643998 | 74644235 |
| chr1 | 74661389 | 74662223 |
| chr1 | 74712127 | 74712323 |
| chr1 | 74713173 | 74713338 |
| chr1 | 74713338 | 74713582 |
| chr1 | 74713582 | 74713867 |
| chr1 | 74714015 | 74714246 |
| chr1 | 74723873 | 74724030 |
| chr1 | 74726643 | 74727247 |
| chr1 | 74748666 | 74749064 |
| chr1 | 74749207 | 74749708 |
| chr1 | 74754223 | 74754405 |
| chr1 | 74759895 | 74760169 |
| chr1 | 74761287 | 74761639 |
| chr1 | 74762115 | 74762267 |
| chr1 | 74763171 | 74763416 |
| chr1 | 74771651 | 74771801 |
| chr1 | 74771877 | 74772076 |
| chr1 | 74772076 | 74772296 |
| chr1 | 74773087 | 74773513 |
| chr1 | 74784053 | 74784294 |
| chr1 | 74784294 | 74784531 |
| chr1 | 74784531 | 74784781 |
| chr1 | 74787892 | 74788184 |
| chr1 | 74791369 | 74791859 |
| chr1 | 74791859 | 74792131 |
| chr1 | 74792131 | 74792332 |
| chr1 | 74793278 | 74793644 |
| chr1 | 74803003 | 74803561 |
| chr1 | 74804768 | 74804977 |

|      |          |          |
|------|----------|----------|
| chr1 | 74805276 | 74805840 |
| chr1 | 74806349 | 74806617 |
| chr1 | 74806617 | 74806928 |
| chr1 | 74807008 | 74807442 |
| chr1 | 74808130 | 74808495 |
| chr1 | 74816572 | 74816877 |
| chr1 | 74816877 | 74817322 |
| chr1 | 74851894 | 74852320 |
| chr1 | 74854702 | 74855175 |
| chr1 | 74855218 | 74855437 |
| chr1 | 74857712 | 74857967 |
| chr1 | 74858104 | 74858366 |
| chr1 | 74858366 | 74858550 |
| chr1 | 74858550 | 74858715 |
| chr1 | 74863358 | 74863538 |
| chr1 | 74880824 | 74881101 |
| chr1 | 74882084 | 74882546 |
| chr1 | 74891645 | 74891818 |
| chr1 | 74892880 | 74893486 |
| chr1 | 74893546 | 74893724 |
| chr1 | 74895103 | 74895279 |
| chr1 | 74900389 | 74900698 |
| chr1 | 74900698 | 74901380 |
| chr1 | 74926782 | 74927009 |
| chr1 | 74948854 | 74949166 |
| chr1 | 74949586 | 74950036 |
| chr1 | 74950170 | 74950384 |
| chr1 | 74962881 | 74963093 |
| chr1 | 74964490 | 74964772 |
| chr1 | 74968010 | 74968330 |
| chr1 | 74971684 | 74972009 |
| chr1 | 74998943 | 74999153 |
| chr1 | 75016907 | 75017176 |
| chr1 | 75017420 | 75017583 |
| chr1 | 75024424 | 75024667 |
| chr1 | 75024771 | 75025365 |
| chr1 | 75036637 | 75036934 |
| chr1 | 75040390 | 75040873 |
| chr1 | 75051528 | 75051755 |
| chr1 | 75051794 | 75051944 |
| chr1 | 75124239 | 75124441 |
| chr1 | 75124524 | 75124844 |

|      |          |          |
|------|----------|----------|
| chr1 | 75124844 | 75125095 |
| chr1 | 75125095 | 75125375 |
| chr1 | 75133237 | 75133482 |
| chr1 | 75133482 | 75133901 |
| chr1 | 75140767 | 75140970 |
| chr1 | 75141337 | 75142011 |
| chr1 | 75142308 | 75142552 |
| chr1 | 75142552 | 75142752 |
| chr1 | 75142752 | 75142939 |
| chr1 | 75142939 | 75143307 |
| chr1 | 75168187 | 75168469 |
| chr1 | 75168469 | 75168801 |
| chr1 | 75168801 | 75169103 |
| chr1 | 75169103 | 75169337 |
| chr1 | 75179134 | 75179589 |
| chr1 | 75179589 | 75179870 |
| chr1 | 75179870 | 75180086 |
| chr1 | 75180086 | 75180317 |
| chr1 | 75180317 | 75180625 |
| chr1 | 75191467 | 75191899 |
| chr1 | 75191899 | 75192500 |
| chr1 | 75192520 | 75192794 |
| chr1 | 75210504 | 75210654 |
| chr1 | 75210656 | 75211114 |
| chr1 | 75214513 | 75215007 |
| chr1 | 75218563 | 75219030 |
| chr1 | 75219124 | 75219469 |
| chr1 | 75219469 | 75219709 |
| chr1 | 75219709 | 75220026 |
| chr1 | 75221567 | 75222006 |
| chr1 | 75230652 | 75231214 |
| chr1 | 75231265 | 75231581 |
| chr1 | 75234653 | 75234940 |
| chr1 | 75236103 | 75236401 |
| chr1 | 75236401 | 75236682 |
| chr1 | 75236682 | 75237068 |
| chr1 | 75237070 | 75237226 |
| chr1 | 75244971 | 75245154 |
| chr1 | 75248024 | 75248467 |
| chr1 | 75248467 | 75248823 |
| chr1 | 75251619 | 75251939 |
| chr1 | 75254313 | 75254542 |

|      |          |          |
|------|----------|----------|
| chr1 | 75263012 | 75263301 |
| chr1 | 75263301 | 75263605 |
| chr1 | 75263605 | 75263929 |
| chr1 | 75264077 | 75264445 |
| chr1 | 75277286 | 75277492 |
| chr1 | 75283182 | 75283334 |
| chr1 | 75289493 | 75289670 |
| chr1 | 75292419 | 75292671 |
| chr1 | 75292741 | 75293253 |
| chr1 | 75316930 | 75317244 |
| chr1 | 75317244 | 75317539 |
| chr1 | 75317539 | 75317847 |
| chr1 | 75317847 | 75318161 |
| chr1 | 75337815 | 75338125 |
| chr1 | 75338125 | 75338438 |
| chr1 | 75341238 | 75341436 |
| chr1 | 75342932 | 75343174 |
| chr1 | 75347589 | 75347777 |
| chr1 | 75360355 | 75360513 |
| chr1 | 75369595 | 75369773 |
| chr1 | 75371470 | 75371704 |
| chr1 | 75380760 | 75381085 |
| chr1 | 75381544 | 75381700 |
| chr1 | 75381968 | 75382178 |
| chr1 | 75382801 | 75383025 |
| chr1 | 75388253 | 75388445 |
| chr1 | 75392941 | 75393494 |
| chr1 | 75398724 | 75399077 |
| chr1 | 75399077 | 75399356 |
| chr1 | 75399902 | 75400216 |
| chr1 | 75408330 | 75408483 |
| chr1 | 75413844 | 75414021 |
| chr1 | 75422897 | 75423138 |
| chr1 | 75423138 | 75423482 |
| chr1 | 75425886 | 75426043 |
| chr1 | 75427500 | 75427777 |
| chr1 | 75435783 | 75436095 |
| chr1 | 75436095 | 75436399 |
| chr1 | 75445761 | 75446084 |
| chr1 | 75450682 | 75450855 |
| chr1 | 75450945 | 75451095 |
| chr1 | 75455554 | 75455793 |

|      |          |          |
|------|----------|----------|
| chr1 | 75457963 | 75458153 |
| chr1 | 75458316 | 75458577 |
| chr1 | 75458577 | 75458778 |
| chr1 | 75460569 | 75460849 |
| chr1 | 75460849 | 75461199 |
| chr1 | 75461199 | 75461662 |
| chr1 | 75461662 | 75462157 |
| chr1 | 75462157 | 75462511 |
| chr1 | 75462511 | 75462757 |
| chr1 | 75467306 | 75467463 |
| chr1 | 75467508 | 75467954 |
| chr1 | 75467964 | 75468148 |
| chr1 | 75477217 | 75477384 |
| chr1 | 75477422 | 75477814 |
| chr1 | 75478590 | 75478814 |
| chr1 | 75478814 | 75479085 |
| chr1 | 75479085 | 75479405 |
| chr1 | 75479405 | 75479714 |
| chr1 | 75486543 | 75487066 |
| chr1 | 75487098 | 75487334 |
| chr1 | 75487422 | 75487657 |
| chr1 | 75487657 | 75487923 |
| chr1 | 75487923 | 75488224 |
| chr1 | 75495243 | 75495517 |
| chr1 | 75499014 | 75499244 |
| chr1 | 75499537 | 75499734 |
| chr1 | 75505055 | 75505416 |
| chr1 | 75505416 | 75505809 |
| chr1 | 75505809 | 75506202 |
| chr1 | 75506202 | 75506575 |
| chr1 | 75506575 | 75506914 |
| chr1 | 75513325 | 75513487 |
| chr1 | 75518021 | 75518420 |
| chr1 | 75521198 | 75521637 |
| chr1 | 75521637 | 75521879 |
| chr1 | 75521879 | 75522089 |
| chr1 | 75530580 | 75530840 |
| chr1 | 75546153 | 75546989 |
| chr1 | 75559255 | 75559532 |
| chr1 | 75559532 | 75560011 |
| chr1 | 75575077 | 75575259 |
| chr1 | 75588508 | 75588676 |



|      |          |          |
|------|----------|----------|
| chr1 | 75615098 | 75615321 |
| chr1 | 75618294 | 75618573 |
| chr1 | 75618576 | 75618735 |
| chr1 | 75635758 | 75635918 |
| chr1 | 75652593 | 75652812 |
| chr1 | 75653700 | 75653994 |
| chr1 | 75896133 | 75896310 |
| chr1 | 76010575 | 76010752 |
| chr1 | 76018108 | 76018293 |
| chr1 | 76019144 | 76019573 |
| chr1 | 76019597 | 76019897 |
| chr1 | 76296569 | 76296861 |
| chr1 | 76570365 | 76570706 |
| chr1 | 76616458 | 76616632 |
| chr1 | 76644870 | 76645320 |
| chr1 | 76646013 | 76646404 |
| chr1 | 76776616 | 76776842 |
| chr1 | 76927144 | 76927312 |
| chr1 | 76928059 | 76928390 |
| chr1 | 76958235 | 76958403 |
| chr1 | 76970753 | 76970993 |
| chr1 | 76993867 | 76994070 |
| chr1 | 77008060 | 77008326 |
| chr1 | 77008417 | 77008704 |
| chr1 | 77051289 | 77051591 |
| chr1 | 77143052 | 77143431 |
| chr1 | 77163347 | 77163668 |
| chr1 | 77206570 | 77206869 |
| chr1 | 77213299 | 77213505 |
| chr1 | 77216421 | 77216583 |
| chr1 | 77219535 | 77219781 |
| chr1 | 77219865 | 77220231 |
| chr1 | 77258818 | 77259019 |
| chr1 | 77363160 | 77363484 |
| chr1 | 77363653 | 77364342 |
| chr1 | 77364637 | 77364837 |
| chr1 | 77365897 | 77366073 |
| chr1 | 77374179 | 77374361 |
| chr1 | 77396189 | 77396339 |
| chr1 | 77399820 | 77399997 |
| chr1 | 77420426 | 77420576 |
| chr1 | 77421199 | 77421482 |

|      |          |          |
|------|----------|----------|
| chr1 | 77433238 | 77433466 |
| chr1 | 77439743 | 77439991 |
| chr1 | 77444759 | 77445038 |
| chr1 | 77445038 | 77445401 |
| chr1 | 77454073 | 77454345 |
| chr1 | 77459056 | 77459307 |
| chr1 | 77460617 | 77461518 |
| chr1 | 77462354 | 77462510 |
| chr1 | 77463353 | 77463667 |
| chr1 | 77465624 | 77465779 |
| chr1 | 77467387 | 77467938 |
| chr1 | 77471084 | 77471508 |
| chr1 | 77473447 | 77473754 |
| chr1 | 77489429 | 77489779 |
| chr1 | 77490262 | 77490513 |
| chr1 | 77490513 | 77490764 |
| chr1 | 77503808 | 77504067 |
| chr1 | 77504067 | 77504363 |
| chr1 | 77504779 | 77505116 |
| chr1 | 77506018 | 77506273 |
| chr1 | 77506362 | 77506525 |
| chr1 | 77506834 | 77507037 |
| chr1 | 77513493 | 77513692 |
| chr1 | 77513692 | 77513889 |
| chr1 | 77514651 | 77515032 |
| chr1 | 77515032 | 77515331 |
| chr1 | 77515331 | 77515589 |
| chr1 | 77515705 | 77516049 |
| chr1 | 77516049 | 77516314 |
| chr1 | 77516314 | 77516649 |
| chr1 | 77516739 | 77516999 |
| chr1 | 77523431 | 77523691 |
| chr1 | 77535964 | 77536251 |
| chr1 | 77536251 | 77536533 |
| chr1 | 77538326 | 77538575 |
| chr1 | 77538628 | 77538995 |
| chr1 | 77616570 | 77616822 |
| chr1 | 77631026 | 77631197 |
| chr1 | 77631197 | 77631356 |
| chr1 | 77674714 | 77674895 |
| chr1 | 77695180 | 77695726 |
| chr1 | 77749127 | 77749279 |

|      |          |          |
|------|----------|----------|
| chr1 | 77809086 | 77809252 |
| chr1 | 77820204 | 77820423 |
| chr1 | 77832260 | 77832570 |
| chr1 | 77839668 | 77839906 |
| chr1 | 77845880 | 77846611 |
| chr1 | 77861731 | 77862017 |
| chr1 | 77869190 | 77869491 |
| chr1 | 77870182 | 77870399 |
| chr1 | 77876877 | 77877077 |
| chr1 | 77879069 | 77879377 |
| chr1 | 77959385 | 77959615 |
| chr1 | 77978762 | 77978997 |
| chr1 | 78033025 | 78033175 |
| chr1 | 78057943 | 78058232 |
| chr1 | 78060918 | 78061215 |
| chr1 | 78088665 | 78088944 |
| chr1 | 78196581 | 78196886 |
| chr1 | 78196886 | 78197367 |
| chr1 | 78203605 | 78203755 |
| chr1 | 78203839 | 78204027 |
| chr1 | 78204027 | 78204213 |
| chr1 | 78215812 | 78216145 |
| chr1 | 78216209 | 78216373 |
| chr1 | 78216517 | 78216810 |
| chr1 | 78216810 | 78217181 |
| chr1 | 78217181 | 78217714 |
| chr1 | 78269383 | 78269624 |
| chr1 | 78269840 | 78270031 |
| chr1 | 78272897 | 78273292 |
| chr1 | 78310029 | 78310474 |
| chr1 | 78310474 | 78310796 |
| chr1 | 78310886 | 78311036 |
| chr1 | 78320374 | 78320614 |
| chr1 | 78322581 | 78322742 |
| chr1 | 78347600 | 78347841 |
| chr1 | 78366021 | 78366272 |
| chr1 | 78387889 | 78388196 |
| chr1 | 78388226 | 78388379 |
| chr1 | 78388658 | 78388875 |
| chr1 | 78395276 | 78395568 |
| chr1 | 78396317 | 78396639 |
| chr1 | 78398638 | 78398881 |

|      |          |          |
|------|----------|----------|
| chr1 | 78419726 | 78419910 |
| chr1 | 78435938 | 78436389 |
| chr1 | 78436389 | 78436863 |
| chr1 | 78437020 | 78437581 |
| chr1 | 78447973 | 78448265 |
| chr1 | 78448265 | 78448760 |
| chr1 | 78488385 | 78488974 |
| chr1 | 78489037 | 78489291 |
| chr1 | 78489291 | 78489647 |
| chr1 | 78511876 | 78512176 |
| chr1 | 78521310 | 78521516 |
| chr1 | 78525285 | 78525446 |
| chr1 | 78528859 | 78529035 |
| chr1 | 78529041 | 78529374 |
| chr1 | 78529374 | 78529628 |
| chr1 | 78530304 | 78530733 |
| chr1 | 78536865 | 78537065 |
| chr1 | 78537514 | 78538040 |
| chr1 | 78538463 | 78538747 |
| chr1 | 78554092 | 78554573 |
| chr1 | 78559313 | 78559953 |
| chr1 | 78568216 | 78568452 |
| chr1 | 78573659 | 78574267 |
| chr1 | 78574267 | 78574722 |
| chr1 | 78575253 | 78575462 |
| chr1 | 78585130 | 78585679 |
| chr1 | 78586953 | 78587310 |
| chr1 | 78602124 | 78602297 |
| chr1 | 78603024 | 78603243 |
| chr1 | 78609677 | 78609827 |
| chr1 | 78622131 | 78622513 |
| chr1 | 78629024 | 78629596 |
| chr1 | 78642552 | 78642824 |
| chr1 | 78644005 | 78644518 |
| chr1 | 78644518 | 78644968 |
| chr1 | 78646938 | 78647123 |
| chr1 | 78647352 | 78647791 |
| chr1 | 78649300 | 78649590 |
| chr1 | 78656431 | 78656830 |
| chr1 | 78657554 | 78658120 |
| chr1 | 78658120 | 78658549 |
| chr1 | 78684732 | 78684902 |

|      |          |          |
|------|----------|----------|
| chr1 | 78686969 | 78687165 |
| chr1 | 78687773 | 78688042 |
| chr1 | 78701851 | 78702047 |
| chr1 | 78704986 | 78705318 |
| chr1 | 78724590 | 78724842 |
| chr1 | 78724842 | 78725139 |
| chr1 | 78725139 | 78725427 |
| chr1 | 78725669 | 78725894 |
| chr1 | 78725894 | 78726112 |
| chr1 | 78744522 | 78744776 |
| chr1 | 78745010 | 78745479 |
| chr1 | 78745479 | 78745832 |
| chr1 | 78770925 | 78771098 |
| chr1 | 78775399 | 78775567 |
| chr1 | 78781969 | 78782226 |
| chr1 | 78807565 | 78807715 |
| chr1 | 78810754 | 78811175 |
| chr1 | 78811695 | 78812179 |
| chr1 | 78812179 | 78812626 |
| chr1 | 78814743 | 78814957 |
| chr1 | 78846610 | 78846761 |
| chr1 | 78866010 | 78866337 |
| chr1 | 78866590 | 78866814 |
| chr1 | 78867003 | 78867162 |
| chr1 | 78876165 | 78876470 |
| chr1 | 78895782 | 78896089 |
| chr1 | 78897463 | 78897809 |
| chr1 | 78908092 | 78908326 |
| chr1 | 78924962 | 78925206 |
| chr1 | 78999571 | 78999875 |
| chr1 | 79074600 | 79074801 |
| chr1 | 79075484 | 79075666 |
| chr1 | 79090341 | 79090523 |
| chr1 | 79105980 | 79106307 |
| chr1 | 79144082 | 79144514 |
| chr1 | 79144514 | 79144746 |
| chr1 | 79176855 | 79177325 |
| chr1 | 79188804 | 79189027 |
| chr1 | 79189358 | 79189679 |
| chr1 | 79190530 | 79190806 |
| chr1 | 79190946 | 79191160 |
| chr1 | 79191160 | 79191446 |

|      |          |          |
|------|----------|----------|
| chr1 | 79197789 | 79198018 |
| chr1 | 79315663 | 79315843 |
| chr1 | 79362710 | 79363007 |
| chr1 | 79363324 | 79363502 |
| chr1 | 79400410 | 79400634 |
| chr1 | 79424376 | 79424708 |
| chr1 | 79424708 | 79425019 |
| chr1 | 79431059 | 79431398 |
| chr1 | 79432403 | 79432669 |
| chr1 | 79439908 | 79440322 |
| chr1 | 79457675 | 79457841 |
| chr1 | 79470594 | 79470915 |
| chr1 | 79470915 | 79471252 |
| chr1 | 79506848 | 79507250 |
| chr1 | 79507762 | 79507956 |
| chr1 | 79520946 | 79521225 |
| chr1 | 79521730 | 79522088 |
| chr1 | 79559334 | 79559734 |
| chr1 | 79561078 | 79561230 |
| chr1 | 79561233 | 79561560 |
| chr1 | 79570532 | 79570736 |
| chr1 | 79581078 | 79581397 |
| chr1 | 79581397 | 79581761 |
| chr1 | 79637552 | 79638103 |
| chr1 | 79638103 | 79638360 |
| chr1 | 79638360 | 79638641 |
| chr1 | 79639155 | 79639381 |
| chr1 | 79640227 | 79640632 |
| chr1 | 79641542 | 79641792 |
| chr1 | 79671486 | 79671852 |
| chr1 | 79671852 | 79672089 |
| chr1 | 79672089 | 79672366 |
| chr1 | 79678216 | 79678413 |
| chr1 | 79678413 | 79678723 |
| chr1 | 79678723 | 79679195 |
| chr1 | 79679199 | 79679475 |
| chr1 | 79691493 | 79691881 |
| chr1 | 79697029 | 79697366 |
| chr1 | 79697366 | 79697793 |
| chr1 | 79698287 | 79698445 |
| chr1 | 79736318 | 79736807 |
| chr1 | 79741214 | 79741411 |

|      |          |          |
|------|----------|----------|
| chr1 | 79746021 | 79746484 |
| chr1 | 79749542 | 79749728 |
| chr1 | 79759503 | 79759905 |
| chr1 | 79760696 | 79761080 |
| chr1 | 79761109 | 79761563 |
| chr1 | 79761563 | 79761915 |
| chr1 | 79775880 | 79776512 |
| chr1 | 79782469 | 79782688 |
| chr1 | 79786674 | 79786833 |
| chr1 | 79819417 | 79819715 |
| chr1 | 79822590 | 79822849 |
| chr1 | 79822849 | 79823135 |
| chr1 | 79823135 | 79823456 |
| chr1 | 79858046 | 79858763 |
| chr1 | 79858763 | 79859016 |
| chr1 | 79859016 | 79859242 |
| chr1 | 79859476 | 79859725 |
| chr1 | 79928748 | 79928905 |
| chr1 | 80025830 | 80026151 |
| chr1 | 80171241 | 80171391 |
| chr1 | 80171553 | 80172388 |
| chr1 | 80172704 | 80172890 |
| chr1 | 80177637 | 80177947 |
| chr1 | 80180256 | 80180406 |
| chr1 | 80278816 | 80279048 |
| chr1 | 80308954 | 80309174 |
| chr1 | 80339435 | 80339646 |
| chr1 | 80340163 | 80340512 |
| chr1 | 80340512 | 80340896 |
| chr1 | 80340896 | 80341414 |
| chr1 | 80362419 | 80362852 |
| chr1 | 80395441 | 80395596 |
| chr1 | 80405223 | 80405534 |
| chr1 | 80418042 | 80418313 |
| chr1 | 80418374 | 80418652 |
| chr1 | 80418722 | 80419002 |
| chr1 | 80447195 | 80447413 |
| chr1 | 80447586 | 80447925 |
| chr1 | 80447930 | 80448239 |
| chr1 | 80496412 | 80496638 |
| chr1 | 80506086 | 80506415 |
| chr1 | 80512715 | 80512883 |

|      |          |          |
|------|----------|----------|
| chr1 | 80603195 | 80603386 |
| chr1 | 80606147 | 80606566 |
| chr1 | 80607605 | 80607781 |
| chr1 | 80609757 | 80609911 |
| chr1 | 80639780 | 80640073 |
| chr1 | 80641793 | 80642212 |
| chr1 | 80642328 | 80642497 |
| chr1 | 80714030 | 80714190 |
| chr1 | 80717551 | 80717727 |
| chr1 | 80855274 | 80855426 |
| chr1 | 81310186 | 81310409 |
| chr1 | 81316675 | 81316879 |
| chr1 | 81369172 | 81369358 |
| chr1 | 81516708 | 81516863 |
| chr1 | 81525886 | 81526128 |
| chr1 | 81591746 | 81591962 |
| chr1 | 81623863 | 81624174 |
| chr1 | 81624174 | 81624508 |
| chr1 | 81625958 | 81626109 |
| chr1 | 81630529 | 81630769 |
| chr1 | 81636105 | 81636308 |
| chr1 | 81636404 | 81636556 |
| chr1 | 81671070 | 81671473 |
| chr1 | 81671838 | 81672096 |
| chr1 | 81677790 | 81677974 |
| chr1 | 81726414 | 81726724 |
| chr1 | 81726724 | 81727019 |
| chr1 | 81733953 | 81734254 |
| chr1 | 81735606 | 81735885 |
| chr1 | 81740029 | 81740355 |
| chr1 | 81743448 | 81743708 |
| chr1 | 81744551 | 81744981 |
| chr1 | 81745685 | 81746007 |
| chr1 | 81746130 | 81746322 |
| chr1 | 81754193 | 81754359 |
| chr1 | 81755295 | 81755632 |
| chr1 | 81755715 | 81756120 |
| chr1 | 81756318 | 81756479 |
| chr1 | 81759961 | 81760235 |
| chr1 | 81859501 | 81859940 |
| chr1 | 81860046 | 81860314 |
| chr1 | 81869665 | 81869831 |



|      |          |          |
|------|----------|----------|
| chr1 | 81912591 | 81913006 |
| chr1 | 81913442 | 81913824 |
| chr1 | 81913824 | 81914018 |
| chr1 | 81915052 | 81915220 |
| chr1 | 81933725 | 81933923 |
| chr1 | 81940323 | 81940582 |
| chr1 | 81950094 | 81950407 |
| chr1 | 81951535 | 81951937 |
| chr1 | 81954547 | 81954918 |
| chr1 | 81987443 | 81987804 |
| chr1 | 81991236 | 81991429 |
| chr1 | 82031240 | 82031525 |
| chr1 | 82031541 | 82031838 |
| chr1 | 82032402 | 82032802 |
| chr1 | 82110393 | 82110543 |
| chr1 | 82150785 | 82151221 |
| chr1 | 82155939 | 82156454 |
| chr1 | 82157144 | 82157294 |
| chr1 | 82157463 | 82157661 |
| chr1 | 82158567 | 82158803 |
| chr1 | 82162874 | 82163253 |
| chr1 | 82189537 | 82190163 |
| chr1 | 82283040 | 82283750 |
| chr1 | 82283952 | 82284148 |
| chr1 | 82290106 | 82290261 |
| chr1 | 82290635 | 82290964 |
| chr1 | 82290964 | 82291353 |
| chr1 | 82291353 | 82291864 |
| chr1 | 82316179 | 82316810 |
| chr1 | 82316810 | 82317147 |
| chr1 | 82347693 | 82347876 |
| chr1 | 82358936 | 82359324 |
| chr1 | 82362372 | 82362567 |
| chr1 | 82363874 | 82364179 |
| chr1 | 82371909 | 82372189 |
| chr1 | 82373709 | 82374029 |
| chr1 | 82414552 | 82414738 |
| chr1 | 82428767 | 82429092 |
| chr1 | 82429092 | 82429419 |
| chr1 | 82429419 | 82429639 |
| chr1 | 82433446 | 82433650 |
| chr1 | 82477314 | 82477787 |

|      |          |          |
|------|----------|----------|
| chr1 | 82477787 | 82478098 |
| chr1 | 82526039 | 82526409 |
| chr1 | 82536613 | 82536766 |
| chr1 | 82536805 | 82537043 |
| chr1 | 82537902 | 82538084 |
| chr1 | 82554407 | 82554676 |
| chr1 | 82574473 | 82574713 |
| chr1 | 82577884 | 82578215 |
| chr1 | 82586462 | 82586752 |
| chr1 | 82586752 | 82587094 |
| chr1 | 82587094 | 82587403 |
| chr1 | 82587403 | 82587649 |
| chr1 | 82597239 | 82597627 |
| chr1 | 82598985 | 82599564 |
| chr1 | 82603330 | 82603506 |
| chr1 | 82603607 | 82603758 |
| chr1 | 82605310 | 82605756 |
| chr1 | 82610235 | 82610478 |
| chr1 | 82613224 | 82613387 |
| chr1 | 82616371 | 82616521 |
| chr1 | 82634529 | 82634679 |
| chr1 | 82648795 | 82648983 |
| chr1 | 82701590 | 82701774 |
| chr1 | 82724699 | 82725005 |
| chr1 | 82725005 | 82725279 |
| chr1 | 82725297 | 82725533 |
| chr1 | 82785598 | 82785883 |
| chr1 | 82787391 | 82787842 |
| chr1 | 82793118 | 82793441 |
| chr1 | 82795099 | 82795597 |
| chr1 | 82795697 | 82795975 |
| chr1 | 82796017 | 82796356 |
| chr1 | 82801163 | 82801428 |
| chr1 | 82801428 | 82801713 |
| chr1 | 82801787 | 82802061 |
| chr1 | 82803691 | 82803918 |
| chr1 | 82811690 | 82812206 |
| chr1 | 82826056 | 82826461 |
| chr1 | 82831794 | 82832266 |
| chr1 | 82834597 | 82834911 |
| chr1 | 82839189 | 82839606 |
| chr1 | 82839606 | 82840442 |

|      |          |          |
|------|----------|----------|
| chr1 | 82879188 | 82879668 |
| chr1 | 82902203 | 82902379 |
| chr1 | 82902924 | 82903222 |
| chr1 | 82903590 | 82903750 |
| chr1 | 82905520 | 82905786 |
| chr1 | 82913013 | 82913182 |
| chr1 | 82913262 | 82913448 |
| chr1 | 82913448 | 82913675 |
| chr1 | 82916884 | 82917116 |
| chr1 | 82938820 | 82938975 |
| chr1 | 82946171 | 82946370 |
| chr1 | 82946687 | 82946906 |
| chr1 | 82947316 | 82947503 |
| chr1 | 82948702 | 82948935 |
| chr1 | 82949180 | 82949421 |
| chr1 | 82954857 | 82955066 |
| chr1 | 82962344 | 82962540 |
| chr1 | 82971586 | 82971806 |
| chr1 | 82972107 | 82972415 |
| chr1 | 82975747 | 82976227 |
| chr1 | 82976227 | 82976630 |
| chr1 | 82977942 | 82978093 |
| chr1 | 82987859 | 82988105 |
| chr1 | 83010987 | 83011254 |
| chr1 | 83031247 | 83031478 |
| chr1 | 83036980 | 83037188 |
| chr1 | 83045212 | 83045447 |
| chr1 | 83063146 | 83063333 |
| chr1 | 83076220 | 83076443 |
| chr1 | 83096141 | 83096395 |
| chr1 | 83096490 | 83096892 |
| chr1 | 83099656 | 83100096 |
| chr1 | 83111749 | 83112071 |
| chr1 | 83116463 | 83116980 |
| chr1 | 83119678 | 83119924 |
| chr1 | 83119924 | 83120605 |
| chr1 | 83135605 | 83135900 |
| chr1 | 83135900 | 83136201 |
| chr1 | 83137334 | 83137591 |
| chr1 | 83137814 | 83138170 |
| chr1 | 83138215 | 83138427 |
| chr1 | 83142093 | 83142353 |

|      |          |          |
|------|----------|----------|
| chr1 | 83154728 | 83155157 |
| chr1 | 83156496 | 83156646 |
| chr1 | 83156713 | 83157258 |
| chr1 | 83187247 | 83187483 |
| chr1 | 83850469 | 83850737 |
| chr1 | 83850895 | 83851192 |
| chr1 | 83851192 | 83851455 |
| chr1 | 83900239 | 83900448 |
| chr1 | 83906704 | 83906884 |
| chr1 | 83907046 | 83907202 |
| chr1 | 84093435 | 84093663 |
| chr1 | 84284458 | 84284699 |
| chr1 | 84286912 | 84287126 |
| chr1 | 84360157 | 84360460 |
| chr1 | 84363755 | 84363939 |
| chr1 | 84387624 | 84387947 |
| chr1 | 84388207 | 84388366 |
| chr1 | 84390314 | 84390464 |
| chr1 | 84405920 | 84406247 |
| chr1 | 84406810 | 84407217 |
| chr1 | 84407217 | 84407560 |
| chr1 | 84444123 | 84444518 |
| chr1 | 84561900 | 84562177 |
| chr1 | 84581913 | 84582118 |
| chr1 | 84596444 | 84596665 |
| chr1 | 84695542 | 84695755 |
| chr1 | 84695755 | 84696140 |
| chr1 | 84696149 | 84696470 |
| chr1 | 84838604 | 84838865 |
| chr1 | 84838865 | 84839177 |
| chr1 | 84839220 | 84839667 |
| chr1 | 84839667 | 84839983 |
| chr1 | 84839983 | 84840202 |
| chr1 | 84840202 | 84840440 |
| chr1 | 84862473 | 84862685 |
| chr1 | 84869544 | 84869879 |
| chr1 | 84881248 | 84881502 |
| chr1 | 84881520 | 84881867 |
| chr1 | 84881867 | 84882215 |
| chr1 | 84882231 | 84882393 |
| chr1 | 84919277 | 84919492 |
| chr1 | 84933544 | 84933758 |

|      |          |          |
|------|----------|----------|
| chr1 | 84934363 | 84934734 |
| chr1 | 84934734 | 84934956 |
| chr1 | 84934963 | 84935145 |
| chr1 | 84935145 | 84935339 |
| chr1 | 84935772 | 84935981 |
| chr1 | 84939028 | 84939276 |
| chr1 | 84955348 | 84955545 |
| chr1 | 84955718 | 84955942 |
| chr1 | 84956711 | 84956878 |
| chr1 | 84960478 | 84960635 |
| chr1 | 84962594 | 84963089 |
| chr1 | 84963089 | 84963301 |
| chr1 | 84963576 | 84963860 |
| chr1 | 84963860 | 84964037 |
| chr1 | 84964037 | 84964220 |
| chr1 | 84964811 | 84964979 |
| chr1 | 84965023 | 84965240 |
| chr1 | 84965622 | 84965950 |
| chr1 | 84965950 | 84966257 |
| chr1 | 84975838 | 84976332 |
| chr1 | 84976435 | 84976893 |
| chr1 | 84979040 | 84979302 |
| chr1 | 84979646 | 84979852 |
| chr1 | 84982272 | 84982446 |
| chr1 | 84982620 | 84982823 |
| chr1 | 84982823 | 84983055 |
| chr1 | 84984444 | 84984748 |
| chr1 | 84986224 | 84986438 |
| chr1 | 84987396 | 84987693 |
| chr1 | 84987693 | 84987888 |
| chr1 | 84991233 | 84991398 |
| chr1 | 84993039 | 84993199 |
| chr1 | 84993829 | 84994247 |
| chr1 | 84994303 | 84994546 |
| chr1 | 84994546 | 84994841 |
| chr1 | 84994968 | 84995206 |
| chr1 | 84995206 | 84995418 |
| chr1 | 85000870 | 85001196 |
| chr1 | 85001196 | 85001506 |
| chr1 | 85001518 | 85001719 |
| chr1 | 85001719 | 85001907 |
| chr1 | 85003213 | 85003413 |

|      |          |          |
|------|----------|----------|
| chr1 | 85007713 | 85007864 |
| chr1 | 85008837 | 85009042 |
| chr1 | 85009130 | 85009344 |
| chr1 | 85009441 | 85009622 |
| chr1 | 85009622 | 85009821 |
| chr1 | 85009821 | 85010084 |
| chr1 | 85010156 | 85010374 |
| chr1 | 85011890 | 85012061 |
| chr1 | 85025970 | 85026142 |
| chr1 | 85026245 | 85026780 |
| chr1 | 85027552 | 85027816 |
| chr1 | 85028293 | 85028536 |
| chr1 | 85028727 | 85028877 |
| chr1 | 85029112 | 85029342 |
| chr1 | 85029415 | 85029700 |
| chr1 | 85029700 | 85029958 |
| chr1 | 85031617 | 85032072 |
| chr1 | 85034651 | 85034837 |
| chr1 | 85037498 | 85037653 |
| chr1 | 85038765 | 85038931 |
| chr1 | 85039818 | 85039992 |
| chr1 | 85043847 | 85044072 |
| chr1 | 85045485 | 85045769 |
| chr1 | 85046243 | 85046674 |
| chr1 | 85046889 | 85047046 |
| chr1 | 85047071 | 85047237 |
| chr1 | 85061821 | 85062065 |
| chr1 | 85062208 | 85062383 |
| chr1 | 85063024 | 85063281 |
| chr1 | 85063281 | 85063604 |
| chr1 | 85064143 | 85064527 |
| chr1 | 85068101 | 85068367 |
| chr1 | 85068552 | 85068704 |
| chr1 | 85069271 | 85069433 |
| chr1 | 85073915 | 85074078 |
| chr1 | 85075079 | 85075388 |
| chr1 | 85080473 | 85080665 |
| chr1 | 85080774 | 85081019 |
| chr1 | 85081019 | 85081260 |
| chr1 | 85082338 | 85082557 |
| chr1 | 85084841 | 85085081 |
| chr1 | 85086305 | 85086621 |

|      |          |          |
|------|----------|----------|
| chr1 | 85086694 | 85086844 |
| chr1 | 85087534 | 85087813 |
| chr1 | 85087813 | 85088043 |
| chr1 | 85089891 | 85090161 |
| chr1 | 85090272 | 85090553 |
| chr1 | 85090553 | 85090869 |
| chr1 | 85090869 | 85091140 |
| chr1 | 85092404 | 85092567 |
| chr1 | 85097251 | 85097454 |
| chr1 | 85097631 | 85097803 |
| chr1 | 85098579 | 85098883 |
| chr1 | 85099057 | 85099286 |
| chr1 | 85100448 | 85100643 |
| chr1 | 85101121 | 85101304 |
| chr1 | 85102754 | 85103034 |
| chr1 | 85105276 | 85105483 |
| chr1 | 85105483 | 85105734 |
| chr1 | 85105734 | 85106012 |
| chr1 | 85106012 | 85106280 |
| chr1 | 85109543 | 85109812 |
| chr1 | 85109812 | 85110051 |
| chr1 | 85110765 | 85111042 |
| chr1 | 85111496 | 85111799 |
| chr1 | 85112132 | 85112291 |
| chr1 | 85113071 | 85113334 |
| chr1 | 85113334 | 85113551 |
| chr1 | 85114345 | 85114542 |
| chr1 | 85114771 | 85115044 |
| chr1 | 85120104 | 85120369 |
| chr1 | 85120529 | 85120715 |
| chr1 | 85122982 | 85123180 |
| chr1 | 85123180 | 85123417 |
| chr1 | 85123695 | 85123876 |
| chr1 | 85124675 | 85124828 |
| chr1 | 85125195 | 85125477 |
| chr1 | 85128373 | 85128701 |
| chr1 | 85131030 | 85131252 |
| chr1 | 85147552 | 85147751 |
| chr1 | 85147751 | 85148057 |
| chr1 | 85153665 | 85153885 |
| chr1 | 85153885 | 85154121 |
| chr1 | 85154260 | 85154439 |

|      |          |          |
|------|----------|----------|
| chr1 | 85155078 | 85155427 |
| chr1 | 85155490 | 85155693 |
| chr1 | 85156130 | 85156333 |
| chr1 | 85156379 | 85156534 |
| chr1 | 85158612 | 85158780 |
| chr1 | 85160653 | 85160841 |
| chr1 | 85161067 | 85161263 |
| chr1 | 85161460 | 85161656 |
| chr1 | 85161656 | 85161843 |
| chr1 | 85162074 | 85162349 |
| chr1 | 85162456 | 85162581 |
| chr1 | 85162581 | 85162661 |
| chr1 | 85164142 | 85164560 |
| chr1 | 85165795 | 85165967 |
| chr1 | 85166979 | 85167363 |
| chr1 | 85168007 | 85168175 |
| chr1 | 85169190 | 85169340 |
| chr1 | 85169983 | 85170208 |
| chr1 | 85171114 | 85171323 |
| chr1 | 85179517 | 85179889 |
| chr1 | 85179889 | 85180132 |
| chr1 | 85182004 | 85182195 |
| chr1 | 85182703 | 85182941 |
| chr1 | 85183161 | 85183363 |
| chr1 | 85185556 | 85185826 |
| chr1 | 85186502 | 85186727 |
| chr1 | 85195927 | 85196077 |
| chr1 | 85196817 | 85197017 |
| chr1 | 85197510 | 85197681 |
| chr1 | 85198321 | 85198613 |
| chr1 | 85198613 | 85198904 |
| chr1 | 85198904 | 85199131 |
| chr1 | 85199131 | 85199347 |
| chr1 | 85199551 | 85199710 |
| chr1 | 85199983 | 85200174 |
| chr1 | 85202409 | 85202698 |
| chr1 | 85206703 | 85206976 |
| chr1 | 85209404 | 85209679 |
| chr1 | 85212869 | 85213101 |
| chr1 | 85214199 | 85214552 |
| chr1 | 85214902 | 85215108 |
| chr1 | 85215108 | 85215457 |



|      |          |          |
|------|----------|----------|
| chr1 | 85216149 | 85216423 |
| chr1 | 85230924 | 85231194 |
| chr1 | 85233143 | 85233417 |
| chr1 | 85233702 | 85233982 |
| chr1 | 85234363 | 85234566 |
| chr1 | 85234581 | 85234858 |
| chr1 | 85235232 | 85235407 |
| chr1 | 85235645 | 85235834 |
| chr1 | 85236082 | 85236481 |
| chr1 | 85241722 | 85242014 |
| chr1 | 85243366 | 85243568 |
| chr1 | 85243776 | 85244023 |
| chr1 | 85244250 | 85244423 |
| chr1 | 85245713 | 85245863 |
| chr1 | 85246933 | 85247270 |
| chr1 | 85247590 | 85247882 |
| chr1 | 85248045 | 85248246 |
| chr1 | 85250601 | 85250901 |
| chr1 | 85254651 | 85254990 |
| chr1 | 85255076 | 85255254 |
| chr1 | 85256362 | 85256545 |
| chr1 | 85257103 | 85257367 |
| chr1 | 85260357 | 85260573 |
| chr1 | 85260573 | 85260763 |
| chr1 | 85261325 | 85261523 |
| chr1 | 85261906 | 85262088 |
| chr1 | 85265681 | 85265867 |
| chr1 | 85269932 | 85270158 |
| chr1 | 85270158 | 85270456 |
| chr1 | 85270549 | 85270770 |
| chr1 | 85272068 | 85272477 |
| chr1 | 85273434 | 85273858 |
| chr1 | 85275466 | 85275621 |
| chr1 | 85276024 | 85276204 |
| chr1 | 85276520 | 85276686 |
| chr1 | 85276850 | 85277201 |
| chr1 | 85277785 | 85277980 |
| chr1 | 85278405 | 85278560 |
| chr1 | 85278664 | 85278828 |
| chr1 | 85278828 | 85278971 |
| chr1 | 85280380 | 85280662 |
| chr1 | 85281732 | 85281982 |

|      |          |          |
|------|----------|----------|
| chr1 | 85284002 | 85284169 |
| chr1 | 85284560 | 85284716 |
| chr1 | 85285451 | 85285742 |
| chr1 | 85286605 | 85286758 |
| chr1 | 85287135 | 85287398 |
| chr1 | 85287531 | 85287825 |
| chr1 | 85294653 | 85294816 |
| chr1 | 85294965 | 85295127 |
| chr1 | 85295129 | 85295309 |
| chr1 | 85296579 | 85296756 |
| chr1 | 85297161 | 85297382 |
| chr1 | 85297730 | 85297931 |
| chr1 | 85304521 | 85304777 |
| chr1 | 85304872 | 85305051 |
| chr1 | 85305168 | 85305336 |
| chr1 | 85305465 | 85305680 |
| chr1 | 85306922 | 85307206 |
| chr1 | 85309577 | 85309761 |
| chr1 | 85309761 | 85309956 |
| chr1 | 85311482 | 85311666 |
| chr1 | 85314022 | 85314262 |
| chr1 | 85319204 | 85319410 |
| chr1 | 85323188 | 85323587 |
| chr1 | 85323735 | 85323927 |
| chr1 | 85327189 | 85327428 |
| chr1 | 85330046 | 85330233 |
| chr1 | 85330251 | 85330415 |
| chr1 | 85330792 | 85330947 |
| chr1 | 85332230 | 85332400 |
| chr1 | 85332403 | 85332649 |
| chr1 | 85332988 | 85333240 |
| chr1 | 85333240 | 85333686 |
| chr1 | 85339834 | 85340048 |
| chr1 | 85340048 | 85340408 |
| chr1 | 85340616 | 85340841 |
| chr1 | 85341084 | 85341395 |
| chr1 | 85341919 | 85342102 |
| chr1 | 85342229 | 85342588 |
| chr1 | 85344739 | 85344973 |
| chr1 | 85344973 | 85345231 |
| chr1 | 85345288 | 85345687 |
| chr1 | 85345877 | 85346027 |

|      |          |          |
|------|----------|----------|
| chr1 | 85346366 | 85346827 |
| chr1 | 85447251 | 85447401 |
| chr1 | 85448531 | 85448702 |
| chr1 | 85448754 | 85448936 |
| chr1 | 85449554 | 85449738 |
| chr1 | 85451539 | 85452170 |
| chr1 | 85454130 | 85454392 |
| chr1 | 85454663 | 85454841 |
| chr1 | 85456200 | 85456351 |
| chr1 | 85458820 | 85459045 |
| chr1 | 85460347 | 85460762 |
| chr1 | 85462527 | 85462677 |
| chr1 | 85462952 | 85463208 |
| chr1 | 85478916 | 85479173 |
| chr1 | 85479173 | 85479550 |
| chr1 | 85481419 | 85481606 |
| chr1 | 85481606 | 85481806 |
| chr1 | 85482991 | 85483166 |
| chr1 | 85483482 | 85483756 |
| chr1 | 85485122 | 85485328 |
| chr1 | 85485450 | 85485627 |
| chr1 | 85485879 | 85486208 |
| chr1 | 85488950 | 85489232 |
| chr1 | 85491512 | 85491832 |
| chr1 | 85492243 | 85492405 |
| chr1 | 85494711 | 85494947 |
| chr1 | 85494947 | 85495263 |
| chr1 | 85495979 | 85496140 |
| chr1 | 85497049 | 85497199 |
| chr1 | 85499006 | 85499258 |
| chr1 | 85500068 | 85500279 |
| chr1 | 85500361 | 85500511 |
| chr1 | 85502634 | 85502907 |
| chr1 | 85502947 | 85503205 |
| chr1 | 85503798 | 85504007 |
| chr1 | 85504080 | 85504360 |
| chr1 | 85506579 | 85506743 |
| chr1 | 85508864 | 85509080 |
| chr1 | 85511662 | 85511835 |
| chr1 | 85522847 | 85523423 |
| chr1 | 85524833 | 85525034 |
| chr1 | 85525252 | 85525457 |

|      |          |          |
|------|----------|----------|
| chr1 | 85525679 | 85525875 |
| chr1 | 85525875 | 85526073 |
| chr1 | 85526073 | 85526265 |
| chr1 | 85526842 | 85527168 |
| chr1 | 85528876 | 85529066 |
| chr1 | 85529958 | 85530221 |
| chr1 | 85534051 | 85534379 |
| chr1 | 85535006 | 85535170 |
| chr1 | 85536583 | 85536831 |
| chr1 | 85539258 | 85539551 |
| chr1 | 85543746 | 85543974 |
| chr1 | 85545050 | 85545376 |
| chr1 | 85546557 | 85546799 |
| chr1 | 85549715 | 85549894 |
| chr1 | 85550428 | 85550627 |
| chr1 | 85550627 | 85550867 |
| chr1 | 85551159 | 85551347 |
| chr1 | 85551621 | 85552112 |
| chr1 | 85553283 | 85553440 |
| chr1 | 85555313 | 85555614 |
| chr1 | 85555614 | 85555811 |
| chr1 | 85562538 | 85562690 |
| chr1 | 85562694 | 85562866 |
| chr1 | 85563098 | 85563391 |
| chr1 | 85565284 | 85565507 |
| chr1 | 85565507 | 85565831 |
| chr1 | 85566046 | 85566210 |
| chr1 | 85570515 | 85570675 |
| chr1 | 85570979 | 85571171 |
| chr1 | 85572293 | 85572445 |
| chr1 | 85572676 | 85572857 |
| chr1 | 85573675 | 85573868 |
| chr1 | 85574011 | 85574356 |
| chr1 | 85575180 | 85575365 |
| chr1 | 85578306 | 85578488 |
| chr1 | 85581290 | 85581444 |
| chr1 | 85581651 | 85581897 |
| chr1 | 85582857 | 85583046 |
| chr1 | 85583378 | 85583534 |
| chr1 | 85584235 | 85584438 |
| chr1 | 85584813 | 85585254 |
| chr1 | 85585867 | 85586220 |

|      |          |          |
|------|----------|----------|
| chr1 | 85588667 | 85589143 |
| chr1 | 85591189 | 85591445 |
| chr1 | 85591445 | 85591797 |
| chr1 | 85591810 | 85592019 |
| chr1 | 85592179 | 85592443 |
| chr1 | 85592443 | 85592634 |
| chr1 | 85592715 | 85592981 |
| chr1 | 85592981 | 85593354 |
| chr1 | 85595032 | 85595198 |
| chr1 | 85597544 | 85597662 |
| chr1 | 85597662 | 85597813 |
| chr1 | 85598377 | 85598689 |
| chr1 | 85598689 | 85599029 |
| chr1 | 85599228 | 85599378 |
| chr1 | 85599397 | 85599632 |
| chr1 | 85600071 | 85600277 |
| chr1 | 85600378 | 85600729 |
| chr1 | 85600737 | 85600913 |
| chr1 | 85600913 | 85601105 |
| chr1 | 85601117 | 85601323 |
| chr1 | 85604224 | 85604427 |
| chr1 | 85604427 | 85604649 |
| chr1 | 85604745 | 85604962 |
| chr1 | 85604962 | 85605170 |
| chr1 | 85605170 | 85605366 |
| chr1 | 85608108 | 85608263 |
| chr1 | 85608924 | 85609236 |
| chr1 | 85609797 | 85610002 |
| chr1 | 85610002 | 85610248 |
| chr1 | 85610248 | 85610482 |
| chr1 | 85614539 | 85614821 |
| chr1 | 85617499 | 85617682 |
| chr1 | 85617682 | 85617886 |
| chr1 | 85618593 | 85618840 |
| chr1 | 85621022 | 85621341 |
| chr1 | 85621827 | 85622238 |
| chr1 | 85624449 | 85624784 |
| chr1 | 85624787 | 85625230 |
| chr1 | 85625308 | 85625646 |
| chr1 | 85625800 | 85625952 |
| chr1 | 85627022 | 85627368 |
| chr1 | 85629728 | 85629927 |

|      |          |          |
|------|----------|----------|
| chr1 | 85632478 | 85632737 |
| chr1 | 85636248 | 85636474 |
| chr1 | 85643768 | 85643954 |
| chr1 | 85648296 | 85648461 |
| chr1 | 85650401 | 85650587 |
| chr1 | 85650587 | 85650812 |
| chr1 | 85653354 | 85653671 |
| chr1 | 85653813 | 85653979 |
| chr1 | 85657511 | 85657825 |
| chr1 | 85657825 | 85658074 |
| chr1 | 85658329 | 85658582 |
| chr1 | 85662765 | 85662973 |
| chr1 | 85668041 | 85668394 |
| chr1 | 85697452 | 85697769 |
| chr1 | 85697797 | 85698004 |
| chr1 | 85703156 | 85703585 |
| chr1 | 85703585 | 85703868 |
| chr1 | 85703868 | 85704125 |
| chr1 | 85729280 | 85729503 |
| chr1 | 85736363 | 85736532 |
| chr1 | 85736554 | 85736804 |
| chr1 | 85740900 | 85741358 |
| chr1 | 85743092 | 85743400 |
| chr1 | 85744661 | 85744920 |
| chr1 | 85747859 | 85748118 |
| chr1 | 85760709 | 85760859 |
| chr1 | 85771985 | 85772224 |
| chr1 | 85775128 | 85775521 |
| chr1 | 85778573 | 85778723 |
| chr1 | 85778936 | 85779281 |
| chr1 | 85779819 | 85780078 |
| chr1 | 85793234 | 85793535 |
| chr1 | 85793535 | 85793759 |
| chr1 | 85793759 | 85793937 |
| chr1 | 85793937 | 85794225 |
| chr1 | 85794225 | 85794577 |
| chr1 | 85794577 | 85794828 |
| chr1 | 85799716 | 85800095 |
| chr1 | 85800206 | 85800375 |
| chr1 | 85806729 | 85807021 |
| chr1 | 85808469 | 85808869 |
| chr1 | 85810810 | 85811099 |

|      |          |          |
|------|----------|----------|
| chr1 | 85811099 | 85811323 |
| chr1 | 85820352 | 85820555 |
| chr1 | 85828948 | 85829387 |
| chr1 | 85837713 | 85837900 |
| chr1 | 85837940 | 85838416 |
| chr1 | 85850932 | 85851090 |
| chr1 | 85853334 | 85853635 |
| chr1 | 85861725 | 85861895 |
| chr1 | 85866054 | 85866247 |
| chr1 | 85868300 | 85868616 |
| chr1 | 85884780 | 85884938 |
| chr1 | 85892837 | 85893028 |
| chr1 | 85894383 | 85894671 |
| chr1 | 85894671 | 85895018 |
| chr1 | 85895149 | 85895822 |
| chr1 | 85924291 | 85924565 |
| chr1 | 85935534 | 85935780 |
| chr1 | 85966939 | 85967129 |
| chr1 | 86007875 | 86008148 |
| chr1 | 86015858 | 86016035 |
| chr1 | 86018218 | 86018478 |
| chr1 | 86018478 | 86018750 |
| chr1 | 86021799 | 86021978 |
| chr1 | 86032290 | 86032458 |
| chr1 | 86037041 | 86037324 |
| chr1 | 86038356 | 86038601 |
| chr1 | 86038601 | 86038843 |
| chr1 | 86038843 | 86039051 |
| chr1 | 86045796 | 86046053 |
| chr1 | 86046053 | 86046260 |
| chr1 | 86046260 | 86046711 |
| chr1 | 86048246 | 86048583 |
| chr1 | 86059370 | 86059782 |
| chr1 | 86061241 | 86061477 |
| chr1 | 86064209 | 86064472 |
| chr1 | 86064555 | 86064774 |
| chr1 | 86064774 | 86065285 |
| chr1 | 86094474 | 86094760 |
| chr1 | 86110657 | 86110821 |
| chr1 | 86110821 | 86110995 |
| chr1 | 86124493 | 86124690 |
| chr1 | 86126048 | 86126352 |

|      |          |          |
|------|----------|----------|
| chr1 | 86126407 | 86126622 |
| chr1 | 86129576 | 86129788 |
| chr1 | 86136463 | 86136760 |
| chr1 | 86141027 | 86141253 |
| chr1 | 86147645 | 86147933 |
| chr1 | 86148290 | 86148478 |
| chr1 | 86148478 | 86148662 |
| chr1 | 86150534 | 86150756 |
| chr1 | 86151082 | 86151319 |
| chr1 | 86151319 | 86151742 |
| chr1 | 86154496 | 86155094 |
| chr1 | 86167273 | 86167624 |
| chr1 | 86178849 | 86179366 |
| chr1 | 86186649 | 86187257 |
| chr1 | 86189125 | 86189479 |
| chr1 | 86210772 | 86210957 |
| chr1 | 86214149 | 86214601 |
| chr1 | 86225204 | 86225623 |
| chr1 | 86226231 | 86226788 |
| chr1 | 86229443 | 86229789 |
| chr1 | 86245793 | 86246033 |
| chr1 | 86257225 | 86257583 |
| chr1 | 86262587 | 86262768 |
| chr1 | 86263974 | 86264203 |
| chr1 | 86273346 | 86273512 |
| chr1 | 86277144 | 86277355 |
| chr1 | 86277355 | 86277569 |
| chr1 | 86278047 | 86278212 |
| chr1 | 86278311 | 86278606 |
| chr1 | 86279059 | 86279289 |
| chr1 | 86279862 | 86280025 |
| chr1 | 86282225 | 86282496 |
| chr1 | 86284911 | 86285342 |
| chr1 | 86293012 | 86293532 |
| chr1 | 86294580 | 86294943 |
| chr1 | 86301312 | 86301740 |
| chr1 | 86301740 | 86302031 |
| chr1 | 86303028 | 86303307 |
| chr1 | 86303307 | 86303580 |
| chr1 | 86303580 | 86303927 |
| chr1 | 86313729 | 86314038 |
| chr1 | 86336327 | 86336675 |



|      |          |          |
|------|----------|----------|
| chr1 | 86338265 | 86338480 |
| chr1 | 86339495 | 86339740 |
| chr1 | 86341198 | 86341487 |
| chr1 | 86341652 | 86341860 |
| chr1 | 86342408 | 86342909 |
| chr1 | 86342909 | 86343540 |
| chr1 | 86343653 | 86343989 |
| chr1 | 86344010 | 86344276 |
| chr1 | 86346985 | 86347172 |
| chr1 | 86347244 | 86347396 |
| chr1 | 86348442 | 86348592 |
| chr1 | 86348643 | 86348822 |
| chr1 | 86353291 | 86353462 |
| chr1 | 86358586 | 86359238 |
| chr1 | 86359238 | 86359737 |
| chr1 | 86359737 | 86360151 |
| chr1 | 86372034 | 86372294 |
| chr1 | 86376438 | 86376856 |
| chr1 | 86380987 | 86381404 |
| chr1 | 86389281 | 86389600 |
| chr1 | 86403716 | 86404246 |
| chr1 | 86406374 | 86406693 |
| chr1 | 86406898 | 86407172 |
| chr1 | 86415583 | 86415834 |
| chr1 | 86415834 | 86416207 |
| chr1 | 86416395 | 86416560 |
| chr1 | 86419942 | 86420118 |
| chr1 | 86421160 | 86421324 |
| chr1 | 86430024 | 86430368 |
| chr1 | 86434104 | 86434412 |
| chr1 | 86434412 | 86434926 |
| chr1 | 86435429 | 86435765 |
| chr1 | 86437929 | 86438186 |
| chr1 | 86439913 | 86440219 |
| chr1 | 86440219 | 86440512 |
| chr1 | 86440512 | 86440868 |
| chr1 | 86441418 | 86441751 |
| chr1 | 86442188 | 86442751 |
| chr1 | 86442751 | 86443007 |
| chr1 | 86448321 | 86448655 |
| chr1 | 86449981 | 86450362 |
| chr1 | 86463580 | 86464134 |

|      |          |          |
|------|----------|----------|
| chr1 | 86470507 | 86471269 |
| chr1 | 86472168 | 86472586 |
| chr1 | 86472593 | 86472961 |
| chr1 | 86487079 | 86487308 |
| chr1 | 86487308 | 86487588 |
| chr1 | 86487588 | 86487848 |
| chr1 | 86487848 | 86488192 |
| chr1 | 86501579 | 86501913 |
| chr1 | 86503355 | 86503872 |
| chr1 | 86503872 | 86504702 |
| chr1 | 86509397 | 86509797 |
| chr1 | 86513083 | 86513360 |
| chr1 | 86516133 | 86516314 |
| chr1 | 86520463 | 86520690 |
| chr1 | 86525228 | 86525526 |
| chr1 | 86525854 | 86526105 |
| chr1 | 86526105 | 86526406 |
| chr1 | 86526406 | 86526975 |
| chr1 | 86527894 | 86528160 |
| chr1 | 86528160 | 86528446 |
| chr1 | 86528626 | 86528935 |
| chr1 | 86530950 | 86531211 |
| chr1 | 86531399 | 86531549 |
| chr1 | 86531710 | 86532202 |
| chr1 | 86532202 | 86532448 |
| chr1 | 86532448 | 86532737 |
| chr1 | 86533779 | 86533941 |
| chr1 | 86538486 | 86538712 |
| chr1 | 86542674 | 86542902 |
| chr1 | 86557825 | 86558200 |
| chr1 | 86582150 | 86582432 |
| chr1 | 86582432 | 86582709 |
| chr1 | 86582709 | 86583017 |
| chr1 | 86586997 | 86587245 |
| chr1 | 86587245 | 86587490 |
| chr1 | 86598646 | 86598803 |
| chr1 | 86614404 | 86614567 |
| chr1 | 86618533 | 86618761 |
| chr1 | 86622289 | 86622547 |
| chr1 | 86623058 | 86623309 |
| chr1 | 86623330 | 86623649 |
| chr1 | 86623649 | 86623899 |

|      |          |          |
|------|----------|----------|
| chr1 | 86628290 | 86628657 |
| chr1 | 86650318 | 86650641 |
| chr1 | 86657588 | 86657930 |
| chr1 | 86669522 | 86669880 |
| chr1 | 86669880 | 86670321 |
| chr1 | 86670321 | 86670736 |
| chr1 | 86679943 | 86680487 |
| chr1 | 86697096 | 86697255 |
| chr1 | 86698822 | 86699040 |
| chr1 | 86703301 | 86703695 |
| chr1 | 86703695 | 86704016 |
| chr1 | 86704016 | 86704290 |
| chr1 | 86728909 | 86729156 |
| chr1 | 86740783 | 86740950 |
| chr1 | 86822236 | 86822749 |
| chr1 | 86995545 | 86995765 |
| chr1 | 87006759 | 87006965 |
| chr1 | 87007144 | 87007390 |
| chr1 | 87008281 | 87008583 |
| chr1 | 87008640 | 87008851 |
| chr1 | 87011779 | 87012051 |
| chr1 | 87012650 | 87013013 |
| chr1 | 87014033 | 87014246 |
| chr1 | 87021678 | 87021862 |
| chr1 | 87028620 | 87029171 |
| chr1 | 87029171 | 87029539 |
| chr1 | 87030615 | 87030969 |
| chr1 | 87040647 | 87041035 |
| chr1 | 87041188 | 87041431 |
| chr1 | 87042095 | 87042403 |
| chr1 | 87051256 | 87051860 |
| chr1 | 87057131 | 87057285 |
| chr1 | 87059741 | 87059992 |
| chr1 | 87070773 | 87071042 |
| chr1 | 87075603 | 87075711 |
| chr1 | 87075711 | 87075758 |
| chr1 | 87077073 | 87077739 |
| chr1 | 87087051 | 87087280 |
| chr1 | 87098622 | 87099026 |
| chr1 | 87102175 | 87102489 |
| chr1 | 87102518 | 87102794 |
| chr1 | 87108426 | 87108596 |

|      |          |          |
|------|----------|----------|
| chr1 | 87108643 | 87108846 |
| chr1 | 87114784 | 87115121 |
| chr1 | 87131837 | 87132034 |
| chr1 | 87132034 | 87132225 |
| chr1 | 87149505 | 87149800 |
| chr1 | 87152647 | 87152835 |
| chr1 | 87154174 | 87154465 |
| chr1 | 87154465 | 87154748 |
| chr1 | 87155891 | 87156168 |
| chr1 | 87159452 | 87159790 |
| chr1 | 87174341 | 87174733 |
| chr1 | 87175808 | 87176078 |
| chr1 | 87176078 | 87176343 |
| chr1 | 87180570 | 87180721 |
| chr1 | 87180782 | 87181314 |
| chr1 | 87181314 | 87181686 |
| chr1 | 87184867 | 87185092 |
| chr1 | 87186626 | 87186839 |
| chr1 | 87186839 | 87187063 |
| chr1 | 87187063 | 87187337 |
| chr1 | 87198332 | 87198548 |
| chr1 | 87205194 | 87205501 |
| chr1 | 87206488 | 87206653 |
| chr1 | 87213236 | 87213537 |
| chr1 | 87213703 | 87214096 |
| chr1 | 87214096 | 87214591 |
| chr1 | 87214944 | 87215094 |
| chr1 | 87215638 | 87215852 |
| chr1 | 87238549 | 87238726 |
| chr1 | 87239091 | 87239465 |
| chr1 | 87246052 | 87246209 |
| chr1 | 87246211 | 87246665 |
| chr1 | 87252804 | 87253128 |
| chr1 | 87254327 | 87254889 |
| chr1 | 87255137 | 87255631 |
| chr1 | 87255705 | 87255877 |
| chr1 | 87259488 | 87259740 |
| chr1 | 87264174 | 87264463 |
| chr1 | 87264463 | 87264756 |
| chr1 | 87264756 | 87264996 |
| chr1 | 87265245 | 87265492 |
| chr1 | 87265654 | 87265848 |

|      |          |          |
|------|----------|----------|
| chr1 | 87266029 | 87266181 |
| chr1 | 87272437 | 87272804 |
| chr1 | 87280399 | 87280602 |
| chr1 | 87287264 | 87287450 |
| chr1 | 87299576 | 87299777 |
| chr1 | 87315840 | 87316250 |
| chr1 | 87316765 | 87316945 |
| chr1 | 87326621 | 87327063 |
| chr1 | 87327063 | 87327355 |
| chr1 | 87327355 | 87327545 |
| chr1 | 87327545 | 87327758 |
| chr1 | 87381718 | 87381921 |
| chr1 | 87381921 | 87382168 |
| chr1 | 87398930 | 87399182 |
| chr1 | 87418762 | 87419010 |
| chr1 | 87447575 | 87447791 |
| chr1 | 87456236 | 87456481 |
| chr1 | 87460059 | 87460344 |
| chr1 | 87466932 | 87467130 |
| chr1 | 87468462 | 87468728 |
| chr1 | 87469254 | 87469442 |
| chr1 | 87470224 | 87470443 |
| chr1 | 87472337 | 87472547 |
| chr1 | 87484921 | 87485196 |
| chr1 | 87486351 | 87486869 |
| chr1 | 87486984 | 87487239 |
| chr1 | 87491703 | 87491908 |
| chr1 | 87492187 | 87492682 |
| chr1 | 87492682 | 87493153 |
| chr1 | 87509099 | 87509473 |
| chr1 | 87509473 | 87509728 |
| chr1 | 87509728 | 87510006 |
| chr1 | 87510006 | 87510267 |
| chr1 | 87510267 | 87510668 |
| chr1 | 87521566 | 87521889 |
| chr1 | 87541653 | 87541965 |
| chr1 | 87548988 | 87549392 |
| chr1 | 87550832 | 87551233 |
| chr1 | 87551233 | 87551527 |
| chr1 | 87553746 | 87554124 |
| chr1 | 87559168 | 87559622 |
| chr1 | 87560194 | 87560576 |

|      |          |          |
|------|----------|----------|
| chr1 | 87565870 | 87566087 |
| chr1 | 87566087 | 87566327 |
| chr1 | 87573744 | 87574291 |
| chr1 | 87574388 | 87574725 |
| chr1 | 87574742 | 87575276 |
| chr1 | 87589899 | 87590298 |
| chr1 | 87594317 | 87594676 |
| chr1 | 87607876 | 87608128 |
| chr1 | 87608487 | 87608722 |
| chr1 | 87608722 | 87608965 |
| chr1 | 87609533 | 87609683 |
| chr1 | 87621390 | 87621794 |
| chr1 | 87637490 | 87637938 |
| chr1 | 87643123 | 87643355 |
| chr1 | 87648765 | 87648915 |
| chr1 | 87667122 | 87667292 |
| chr1 | 87681557 | 87681807 |
| chr1 | 87689702 | 87690010 |
| chr1 | 87690010 | 87690306 |
| chr1 | 87718176 | 87718331 |
| chr1 | 87721489 | 87721680 |
| chr1 | 87722070 | 87722310 |
| chr1 | 87723445 | 87723638 |
| chr1 | 87730349 | 87730566 |
| chr1 | 87755732 | 87756144 |
| chr1 | 87756144 | 87756558 |
| chr1 | 87766161 | 87766554 |
| chr1 | 87772664 | 87773035 |
| chr1 | 87791907 | 87792097 |
| chr1 | 87792884 | 87793123 |
| chr1 | 87793123 | 87793363 |
| chr1 | 87821046 | 87821253 |
| chr1 | 87840160 | 87840775 |
| chr1 | 87840775 | 87841196 |
| chr1 | 87848604 | 87848988 |
| chr1 | 87849011 | 87849292 |
| chr1 | 87850713 | 87850893 |
| chr1 | 87853067 | 87853371 |
| chr1 | 87853371 | 87853677 |
| chr1 | 87853696 | 87854034 |
| chr1 | 87854096 | 87854438 |
| chr1 | 87862159 | 87862525 |

|      |          |          |
|------|----------|----------|
| chr1 | 87885535 | 87885875 |
| chr1 | 87891769 | 87891991 |
| chr1 | 87899727 | 87899877 |
| chr1 | 87900864 | 87901563 |
| chr1 | 87906441 | 87906907 |
| chr1 | 87910491 | 87910753 |
| chr1 | 87911575 | 87911735 |
| chr1 | 87911765 | 87911939 |
| chr1 | 87913365 | 87913586 |
| chr1 | 87917340 | 87917692 |
| chr1 | 87920065 | 87920357 |
| chr1 | 87920357 | 87920601 |
| chr1 | 87922764 | 87922949 |
| chr1 | 87935012 | 87935266 |
| chr1 | 87935590 | 87935896 |
| chr1 | 87936378 | 87936545 |
| chr1 | 87936584 | 87936868 |
| chr1 | 87961529 | 87961851 |
| chr1 | 87986880 | 87987291 |
| chr1 | 87988409 | 87988731 |
| chr1 | 88007801 | 88008122 |
| chr1 | 88008122 | 88008444 |
| chr1 | 88008444 | 88008695 |
| chr1 | 88055571 | 88055736 |
| chr1 | 88094238 | 88094658 |
| chr1 | 88103841 | 88104053 |
| chr1 | 88109084 | 88109363 |
| chr1 | 88120608 | 88120889 |
| chr1 | 88121606 | 88121806 |
| chr1 | 88125920 | 88126322 |
| chr1 | 88135330 | 88135620 |
| chr1 | 88140525 | 88140858 |
| chr1 | 88144114 | 88144266 |
| chr1 | 88144337 | 88144640 |
| chr1 | 88145333 | 88145497 |
| chr1 | 88150217 | 88150560 |
| chr1 | 88151015 | 88151193 |
| chr1 | 88205488 | 88205895 |
| chr1 | 88211715 | 88212214 |
| chr1 | 88212378 | 88212656 |
| chr1 | 88213772 | 88213994 |
| chr1 | 88213994 | 88214228 |

|      |          |          |
|------|----------|----------|
| chr1 | 88214228 | 88214445 |
| chr1 | 88214482 | 88214655 |
| chr1 | 88214655 | 88214810 |
| chr1 | 88218133 | 88218288 |
| chr1 | 88219163 | 88219413 |
| chr1 | 88220436 | 88220587 |
| chr1 | 88223255 | 88223485 |
| chr1 | 88223533 | 88223755 |
| chr1 | 88223755 | 88223917 |
| chr1 | 88224290 | 88224444 |
| chr1 | 88224446 | 88224613 |
| chr1 | 88228112 | 88228283 |
| chr1 | 88228289 | 88228480 |
| chr1 | 88229866 | 88230047 |
| chr1 | 88230134 | 88230350 |
| chr1 | 88230350 | 88230565 |
| chr1 | 88233959 | 88234150 |
| chr1 | 88235111 | 88235362 |
| chr1 | 88236883 | 88237095 |
| chr1 | 88237381 | 88237772 |
| chr1 | 88237893 | 88238044 |
| chr1 | 88238745 | 88238906 |
| chr1 | 88242721 | 88242918 |
| chr1 | 88243138 | 88243288 |
| chr1 | 88244017 | 88244179 |
| chr1 | 88249102 | 88249262 |
| chr1 | 88249266 | 88249468 |
| chr1 | 88249541 | 88249714 |
| chr1 | 88250122 | 88250277 |
| chr1 | 88255637 | 88255864 |
| chr1 | 88256504 | 88256786 |
| chr1 | 88257194 | 88257610 |
| chr1 | 88262235 | 88262683 |
| chr1 | 88268707 | 88268914 |
| chr1 | 88270949 | 88271199 |
| chr1 | 88276794 | 88277033 |
| chr1 | 88277061 | 88277442 |
| chr1 | 88277442 | 88277858 |
| chr1 | 88284364 | 88284592 |
| chr1 | 88284954 | 88285223 |
| chr1 | 88287467 | 88287648 |
| chr1 | 88287648 | 88287887 |



|      |          |          |
|------|----------|----------|
| chr1 | 88287911 | 88288130 |
| chr1 | 88289999 | 88290252 |
| chr1 | 88296117 | 88296372 |
| chr1 | 88296372 | 88296558 |
| chr1 | 88300594 | 88300834 |
| chr1 | 88301249 | 88301555 |
| chr1 | 88301655 | 88301913 |
| chr1 | 88302023 | 88302200 |
| chr1 | 88302547 | 88302699 |
| chr1 | 88306677 | 88306882 |
| chr1 | 88310067 | 88310217 |
| chr1 | 88310430 | 88310704 |
| chr1 | 88317239 | 88317761 |
| chr1 | 88318618 | 88318843 |
| chr1 | 88331037 | 88331346 |
| chr1 | 88331346 | 88331553 |
| chr1 | 88331553 | 88331747 |
| chr1 | 88345578 | 88346029 |
| chr1 | 88357470 | 88357962 |
| chr1 | 88361032 | 88361408 |
| chr1 | 88361519 | 88361730 |
| chr1 | 88393370 | 88393684 |
| chr1 | 88424688 | 88424928 |
| chr1 | 88428153 | 88428412 |
| chr1 | 88428412 | 88428754 |
| chr1 | 88428754 | 88429096 |
| chr1 | 88436942 | 88437684 |
| chr1 | 88437684 | 88438043 |
| chr1 | 88438043 | 88438507 |
| chr1 | 88445449 | 88445724 |
| chr1 | 88452219 | 88452772 |
| chr1 | 88453140 | 88453444 |
| chr1 | 88454772 | 88454963 |
| chr1 | 88456751 | 88457014 |
| chr1 | 88462523 | 88462734 |
| chr1 | 88463272 | 88463557 |
| chr1 | 88464205 | 88464456 |
| chr1 | 88464553 | 88464857 |
| chr1 | 88465813 | 88466034 |
| chr1 | 88466574 | 88467019 |
| chr1 | 88468417 | 88468868 |
| chr1 | 88474404 | 88475110 |

|      |          |          |
|------|----------|----------|
| chr1 | 88475316 | 88475952 |
| chr1 | 88497250 | 88497504 |
| chr1 | 88507873 | 88508247 |
| chr1 | 88508247 | 88508552 |
| chr1 | 88509719 | 88509951 |
| chr1 | 88509951 | 88510356 |
| chr1 | 88525784 | 88526167 |
| chr1 | 88526167 | 88526619 |
| chr1 | 88532187 | 88532453 |
| chr1 | 88533885 | 88534135 |
| chr1 | 88534135 | 88534455 |
| chr1 | 88536349 | 88536570 |
| chr1 | 88536839 | 88537142 |
| chr1 | 88537142 | 88537382 |
| chr1 | 88543145 | 88543365 |
| chr1 | 88543365 | 88543662 |
| chr1 | 88543698 | 88543889 |
| chr1 | 88556402 | 88556981 |
| chr1 | 88559398 | 88559648 |
| chr1 | 88560420 | 88560580 |
| chr1 | 88560663 | 88561146 |
| chr1 | 88562421 | 88562655 |
| chr1 | 88575888 | 88576083 |
| chr1 | 88583770 | 88584204 |
| chr1 | 88584418 | 88584934 |
| chr1 | 88600176 | 88600504 |
| chr1 | 88605579 | 88605916 |
| chr1 | 88620134 | 88620457 |
| chr1 | 88627385 | 88627856 |
| chr1 | 88631579 | 88631771 |
| chr1 | 88631908 | 88632093 |
| chr1 | 88633847 | 88634061 |
| chr1 | 88638724 | 88638968 |
| chr1 | 88639033 | 88639193 |
| chr1 | 88639422 | 88639815 |
| chr1 | 88639815 | 88640215 |
| chr1 | 88645668 | 88645956 |
| chr1 | 88646317 | 88647065 |
| chr1 | 88654673 | 88655046 |
| chr1 | 88662650 | 88663079 |
| chr1 | 88663120 | 88663291 |
| chr1 | 88663697 | 88663979 |

|      |          |          |
|------|----------|----------|
| chr1 | 88668516 | 88668747 |
| chr1 | 88669953 | 88670103 |
| chr1 | 88680787 | 88681115 |
| chr1 | 88681412 | 88681673 |
| chr1 | 88687914 | 88688097 |
| chr1 | 88692238 | 88692751 |
| chr1 | 88694464 | 88694848 |
| chr1 | 88699480 | 88699630 |
| chr1 | 88700539 | 88700703 |
| chr1 | 88701582 | 88701939 |
| chr1 | 88701939 | 88702306 |
| chr1 | 88702306 | 88702769 |
| chr1 | 88702790 | 88703014 |
| chr1 | 88705217 | 88705386 |
| chr1 | 88705816 | 88706134 |
| chr1 | 88729665 | 88729843 |
| chr1 | 88735626 | 88735943 |
| chr1 | 88742547 | 88742698 |
| chr1 | 88745232 | 88745695 |
| chr1 | 88746841 | 88746991 |
| chr1 | 88747864 | 88748147 |
| chr1 | 88750648 | 88750899 |
| chr1 | 88754765 | 88754915 |
| chr1 | 88756765 | 88756923 |
| chr1 | 88763543 | 88763744 |
| chr1 | 88763751 | 88764326 |
| chr1 | 88764725 | 88764911 |
| chr1 | 88774173 | 88774435 |
| chr1 | 88774435 | 88774675 |
| chr1 | 88779868 | 88780082 |
| chr1 | 88783191 | 88783425 |
| chr1 | 88794946 | 88795313 |
| chr1 | 88829282 | 88829459 |
| chr1 | 88836264 | 88836436 |
| chr1 | 88868226 | 88868590 |
| chr1 | 88869153 | 88869407 |
| chr1 | 88869438 | 88869765 |
| chr1 | 88869765 | 88870202 |
| chr1 | 88878852 | 88879229 |
| chr1 | 88911704 | 88912073 |
| chr1 | 88912073 | 88912316 |
| chr1 | 88929324 | 88929496 |

|      |          |          |
|------|----------|----------|
| chr1 | 88945859 | 88946119 |
| chr1 | 88949988 | 88950221 |
| chr1 | 88959469 | 88960096 |
| chr1 | 88988356 | 88988678 |
| chr1 | 88991876 | 88992178 |
| chr1 | 88994825 | 88995116 |
| chr1 | 88995116 | 88995401 |
| chr1 | 89015451 | 89015786 |
| chr1 | 89019641 | 89020360 |
| chr1 | 89030582 | 89030816 |
| chr1 | 89041258 | 89041648 |
| chr1 | 89042727 | 89042997 |
| chr1 | 89068860 | 89069128 |
| chr1 | 89069461 | 89069791 |
| chr1 | 89069877 | 89070278 |
| chr1 | 89070278 | 89070505 |
| chr1 | 89070505 | 89070761 |
| chr1 | 89070905 | 89071063 |
| chr1 | 89074767 | 89074994 |
| chr1 | 89080882 | 89081125 |
| chr1 | 89088873 | 89089258 |
| chr1 | 89089956 | 89090171 |
| chr1 | 89090171 | 89090428 |
| chr1 | 89090487 | 89090719 |
| chr1 | 89090719 | 89090977 |
| chr1 | 89092539 | 89092793 |
| chr1 | 89092793 | 89093064 |
| chr1 | 89096029 | 89096315 |
| chr1 | 89102128 | 89102636 |
| chr1 | 89103585 | 89103810 |
| chr1 | 89103896 | 89104199 |
| chr1 | 89104199 | 89104459 |
| chr1 | 89104459 | 89104861 |
| chr1 | 89108283 | 89108664 |
| chr1 | 89108664 | 89109078 |
| chr1 | 89113761 | 89114076 |
| chr1 | 89116382 | 89116664 |
| chr1 | 89118802 | 89119209 |
| chr1 | 89120089 | 89120300 |
| chr1 | 89121552 | 89121791 |
| chr1 | 89121855 | 89122071 |
| chr1 | 89122478 | 89122789 |

|      |          |          |
|------|----------|----------|
| chr1 | 89123890 | 89124070 |
| chr1 | 89124072 | 89124406 |
| chr1 | 89124406 | 89124630 |
| chr1 | 89125539 | 89126049 |
| chr1 | 89130903 | 89131178 |
| chr1 | 89131178 | 89131504 |
| chr1 | 89131643 | 89132128 |
| chr1 | 89133053 | 89133288 |
| chr1 | 89133288 | 89133699 |
| chr1 | 89141753 | 89141917 |
| chr1 | 89147813 | 89148020 |
| chr1 | 89151345 | 89151522 |
| chr1 | 89151815 | 89151986 |
| chr1 | 89152112 | 89152446 |
| chr1 | 89152446 | 89152703 |
| chr1 | 89152703 | 89153130 |
| chr1 | 89153373 | 89153543 |
| chr1 | 89175499 | 89175656 |
| chr1 | 89175832 | 89176339 |
| chr1 | 89183254 | 89183897 |
| chr1 | 89188155 | 89188520 |
| chr1 | 89191184 | 89191451 |
| chr1 | 89191451 | 89191795 |
| chr1 | 89192941 | 89193091 |
| chr1 | 89196120 | 89196393 |
| chr1 | 89196436 | 89196594 |
| chr1 | 89205882 | 89206142 |
| chr1 | 89206150 | 89206305 |
| chr1 | 89206443 | 89206869 |
| chr1 | 89206869 | 89207316 |
| chr1 | 89207316 | 89207620 |
| chr1 | 89226712 | 89227036 |
| chr1 | 89234973 | 89235259 |
| chr1 | 89235293 | 89235878 |
| chr1 | 89250268 | 89250448 |
| chr1 | 89252431 | 89252909 |
| chr1 | 89265590 | 89266257 |
| chr1 | 89266288 | 89266466 |
| chr1 | 89271665 | 89272166 |
| chr1 | 89272991 | 89273407 |
| chr1 | 89320155 | 89320430 |
| chr1 | 89320481 | 89320661 |

|      |          |          |
|------|----------|----------|
| chr1 | 89323171 | 89323408 |
| chr1 | 89340645 | 89340936 |
| chr1 | 89344548 | 89344868 |
| chr1 | 89360390 | 89360552 |
| chr1 | 89373981 | 89374239 |
| chr1 | 89374239 | 89374699 |
| chr1 | 89378031 | 89378230 |
| chr1 | 89390365 | 89390503 |
| chr1 | 89390503 | 89390647 |
| chr1 | 89392640 | 89393325 |
| chr1 | 89424586 | 89424902 |
| chr1 | 89426252 | 89426549 |
| chr1 | 89454381 | 89455191 |
| chr1 | 89455521 | 89455748 |
| chr1 | 89455754 | 89455937 |
| chr1 | 89456003 | 89456156 |
| chr1 | 89456457 | 89456833 |
| chr1 | 89457184 | 89457420 |
| chr1 | 89462279 | 89462509 |
| chr1 | 89462991 | 89463163 |
| chr1 | 89463187 | 89463489 |
| chr1 | 89470377 | 89470620 |
| chr1 | 89472272 | 89472482 |
| chr1 | 89474711 | 89474877 |
| chr1 | 89474926 | 89475146 |
| chr1 | 89477082 | 89477288 |
| chr1 | 89482166 | 89482555 |
| chr1 | 89489466 | 89489840 |
| chr1 | 89491667 | 89491943 |
| chr1 | 89493265 | 89493483 |
| chr1 | 89494892 | 89495196 |
| chr1 | 89495196 | 89495534 |
| chr1 | 89496399 | 89496579 |
| chr1 | 89501747 | 89501911 |
| chr1 | 89509744 | 89510054 |
| chr1 | 89510073 | 89510223 |
| chr1 | 89513834 | 89514149 |
| chr1 | 89518449 | 89518650 |
| chr1 | 89523794 | 89524145 |
| chr1 | 89524280 | 89524745 |
| chr1 | 89525833 | 89526193 |
| chr1 | 89553823 | 89554125 |

|      |          |          |
|------|----------|----------|
| chr1 | 89554149 | 89554391 |
| chr1 | 89554984 | 89555356 |
| chr1 | 89555356 | 89555853 |
| chr1 | 89556163 | 89556313 |
| chr1 | 89563518 | 89563676 |
| chr1 | 89566599 | 89566952 |
| chr1 | 89568762 | 89568991 |
| chr1 | 89570511 | 89570991 |
| chr1 | 89570991 | 89571460 |
| chr1 | 89571460 | 89571813 |
| chr1 | 89574826 | 89575037 |
| chr1 | 89575283 | 89575469 |
| chr1 | 89575657 | 89575910 |
| chr1 | 89577014 | 89577360 |
| chr1 | 89579987 | 89580381 |
| chr1 | 89580381 | 89580784 |
| chr1 | 89580784 | 89581045 |
| chr1 | 89581045 | 89581264 |
| chr1 | 89581264 | 89581573 |
| chr1 | 89593224 | 89593747 |
| chr1 | 89594449 | 89594704 |
| chr1 | 89597740 | 89597991 |
| chr1 | 89600475 | 89600803 |
| chr1 | 89601039 | 89601252 |
| chr1 | 89601409 | 89601688 |
| chr1 | 89602834 | 89603299 |
| chr1 | 89606664 | 89606877 |
| chr1 | 89620164 | 89620333 |
| chr1 | 89625373 | 89625537 |
| chr1 | 89626129 | 89626295 |
| chr1 | 89628391 | 89628556 |
| chr1 | 89630924 | 89631165 |
| chr1 | 89636895 | 89637056 |
| chr1 | 89641644 | 89641842 |
| chr1 | 89643547 | 89643753 |
| chr1 | 89643773 | 89643955 |
| chr1 | 89644114 | 89644442 |
| chr1 | 89646296 | 89646471 |
| chr1 | 89646487 | 89646637 |
| chr1 | 89646680 | 89646973 |
| chr1 | 89648137 | 89648287 |
| chr1 | 89656293 | 89656671 |

|      |          |          |
|------|----------|----------|
| chr1 | 89656671 | 89656960 |
| chr1 | 89656960 | 89657225 |
| chr1 | 89659166 | 89659415 |
| chr1 | 89663353 | 89663503 |
| chr1 | 89676503 | 89676653 |
| chr1 | 89688989 | 89689323 |
| chr1 | 89696653 | 89696943 |
| chr1 | 89697314 | 89697571 |
| chr1 | 89701417 | 89701635 |
| chr1 | 89730623 | 89730878 |
| chr1 | 89730878 | 89731359 |
| chr1 | 89735269 | 89735451 |
| chr1 | 89742472 | 89742645 |
| chr1 | 89757639 | 89757849 |
| chr1 | 89769428 | 89770046 |
| chr1 | 89771645 | 89772033 |
| chr1 | 89779634 | 89779814 |
| chr1 | 89780517 | 89780724 |
| chr1 | 89780724 | 89781245 |
| chr1 | 89804869 | 89805534 |
| chr1 | 89822459 | 89822750 |
| chr1 | 89831191 | 89831367 |
| chr1 | 89843120 | 89843274 |
| chr1 | 89844127 | 89844338 |
| chr1 | 89927084 | 89927304 |
| chr1 | 89930116 | 89930398 |
| chr1 | 89930398 | 89930751 |
| chr1 | 89930751 | 89931118 |
| chr1 | 89931118 | 89931611 |
| chr1 | 89940086 | 89940243 |
| chr1 | 89940358 | 89940730 |
| chr1 | 89942468 | 89942724 |
| chr1 | 89943266 | 89943549 |
| chr1 | 89943986 | 89944179 |
| chr1 | 89967135 | 89967451 |
| chr1 | 89968190 | 89968786 |
| chr1 | 90010157 | 90010404 |
| chr1 | 90018165 | 90018315 |
| chr1 | 90020426 | 90020576 |
| chr1 | 90027012 | 90027264 |
| chr1 | 90028428 | 90028652 |
| chr1 | 90029640 | 90029875 |



|      |          |          |
|------|----------|----------|
| chr1 | 90038853 | 90039100 |
| chr1 | 90051009 | 90051705 |
| chr1 | 90059194 | 90059419 |
| chr1 | 90060646 | 90060959 |
| chr1 | 90069308 | 90069593 |
| chr1 | 90080998 | 90081387 |
| chr1 | 90094057 | 90094223 |
| chr1 | 90097387 | 90097644 |
| chr1 | 90099823 | 90100168 |
| chr1 | 90100389 | 90100885 |
| chr1 | 90100885 | 90101285 |
| chr1 | 90112411 | 90112599 |
| chr1 | 90112603 | 90113200 |
| chr1 | 90124365 | 90124653 |
| chr1 | 90136037 | 90136371 |
| chr1 | 90141159 | 90141464 |
| chr1 | 90152801 | 90153109 |
| chr1 | 90153143 | 90153713 |
| chr1 | 90164076 | 90164472 |
| chr1 | 90164472 | 90164774 |
| chr1 | 90175145 | 90175391 |
| chr1 | 90177636 | 90177939 |
| chr1 | 90177939 | 90178443 |
| chr1 | 90185329 | 90185887 |
| chr1 | 90186073 | 90186619 |
| chr1 | 90186649 | 90186874 |
| chr1 | 90203771 | 90204075 |
| chr1 | 90204075 | 90204328 |
| chr1 | 90204331 | 90204611 |
| chr1 | 90205349 | 90205664 |
| chr1 | 90205843 | 90205993 |
| chr1 | 90224562 | 90224799 |
| chr1 | 90225418 | 90226276 |
| chr1 | 90230625 | 90230977 |
| chr1 | 90234427 | 90235130 |
| chr1 | 90236655 | 90236984 |
| chr1 | 90244340 | 90244585 |
| chr1 | 90244585 | 90244938 |
| chr1 | 90245475 | 90245857 |
| chr1 | 90250496 | 90250762 |
| chr1 | 90258512 | 90258836 |
| chr1 | 90258836 | 90259201 |

|      |          |          |
|------|----------|----------|
| chr1 | 90273281 | 90273446 |
| chr1 | 90273455 | 90273929 |
| chr1 | 90275040 | 90275353 |
| chr1 | 90275856 | 90276160 |
| chr1 | 90287382 | 90287539 |
| chr1 | 90288804 | 90289276 |
| chr1 | 90289276 | 90289519 |
| chr1 | 90289519 | 90289745 |
| chr1 | 90289781 | 90290162 |
| chr1 | 90377066 | 90377222 |
| chr1 | 90380264 | 90380818 |
| chr1 | 90415881 | 90416128 |
| chr1 | 90416128 | 90416394 |
| chr1 | 90439825 | 90440077 |
| chr1 | 90440077 | 90440447 |
| chr1 | 90441188 | 90441560 |
| chr1 | 90445850 | 90446142 |
| chr1 | 90446142 | 90446456 |
| chr1 | 90446456 | 90446846 |
| chr1 | 90446846 | 90447345 |
| chr1 | 90447345 | 90447783 |
| chr1 | 90447783 | 90448193 |
| chr1 | 90448193 | 90448690 |
| chr1 | 90461446 | 90461651 |
| chr1 | 90461752 | 90462055 |
| chr1 | 90466044 | 90466318 |
| chr1 | 90494505 | 90494664 |
| chr1 | 90503293 | 90503614 |
| chr1 | 90505522 | 90506035 |
| chr1 | 90506590 | 90507042 |
| chr1 | 90517545 | 90517786 |
| chr1 | 90518653 | 90518895 |
| chr1 | 90518928 | 90519329 |
| chr1 | 90519329 | 90519557 |
| chr1 | 90519557 | 90519869 |
| chr1 | 90536209 | 90536417 |
| chr1 | 90587063 | 90587301 |
| chr1 | 90588189 | 90588677 |
| chr1 | 90590874 | 90591113 |
| chr1 | 90592923 | 90593172 |
| chr1 | 90593172 | 90593437 |
| chr1 | 90599254 | 90599600 |

|      |          |          |
|------|----------|----------|
| chr1 | 90600980 | 90601493 |
| chr1 | 90603201 | 90603610 |
| chr1 | 90603612 | 90603773 |
| chr1 | 90633456 | 90634199 |
| chr1 | 90634199 | 90634700 |
| chr1 | 90650732 | 90650971 |
| chr1 | 90650996 | 90651157 |
| chr1 | 90668879 | 90669029 |
| chr1 | 90676154 | 90676361 |
| chr1 | 90677749 | 90678106 |
| chr1 | 90718700 | 90718990 |
| chr1 | 90718990 | 90719255 |
| chr1 | 90719342 | 90719521 |
| chr1 | 90727467 | 90727635 |
| chr1 | 90729462 | 90729861 |
| chr1 | 90738208 | 90738467 |
| chr1 | 90754078 | 90754511 |
| chr1 | 90771260 | 90771419 |
| chr1 | 90803162 | 90803473 |
| chr1 | 90834590 | 90835197 |
| chr1 | 90838710 | 90838887 |
| chr1 | 90840312 | 90840497 |
| chr1 | 90848580 | 90848985 |
| chr1 | 90849933 | 90850191 |
| chr1 | 90857803 | 90858080 |
| chr1 | 90866615 | 90867254 |
| chr1 | 90896362 | 90896544 |
| chr1 | 90896638 | 90897084 |
| chr1 | 90897154 | 90897396 |
| chr1 | 90900608 | 90900816 |
| chr1 | 90906425 | 90906691 |
| chr1 | 90908775 | 90908956 |
| chr1 | 90908956 | 90909105 |
| chr1 | 90909115 | 90909571 |
| chr1 | 90909574 | 90909902 |
| chr1 | 90909902 | 90910211 |
| chr1 | 90914867 | 90915235 |
| chr1 | 90917095 | 90917435 |
| chr1 | 90923082 | 90923455 |
| chr1 | 90923455 | 90924014 |
| chr1 | 90927374 | 90927749 |
| chr1 | 90928001 | 90928260 |

|      |          |          |
|------|----------|----------|
| chr1 | 90928260 | 90928512 |
| chr1 | 90928567 | 90928853 |
| chr1 | 90928853 | 90929088 |
| chr1 | 90937065 | 90937374 |
| chr1 | 90949662 | 90949812 |
| chr1 | 90956358 | 90956575 |
| chr1 | 90956586 | 90956741 |
| chr1 | 90956744 | 90957045 |
| chr1 | 90963026 | 90963195 |
| chr1 | 90963195 | 90963362 |
| chr1 | 90969213 | 90969576 |
| chr1 | 90969620 | 90969830 |
| chr1 | 90973320 | 90973590 |
| chr1 | 90974914 | 90975631 |
| chr1 | 90986952 | 90987107 |
| chr1 | 90988818 | 90989062 |
| chr1 | 90998295 | 90998608 |
| chr1 | 90998608 | 90999017 |
| chr1 | 90999017 | 90999385 |
| chr1 | 90999385 | 90999564 |
| chr1 | 91022508 | 91022849 |
| chr1 | 91022975 | 91023264 |
| chr1 | 91023264 | 91023575 |
| chr1 | 91023971 | 91024278 |
| chr1 | 91024278 | 91024538 |
| chr1 | 91024538 | 91024749 |
| chr1 | 91032651 | 91032878 |
| chr1 | 91035424 | 91035625 |
| chr1 | 91035625 | 91036001 |
| chr1 | 91038087 | 91038329 |
| chr1 | 91041377 | 91041619 |
| chr1 | 91041619 | 91042103 |
| chr1 | 91043324 | 91043681 |
| chr1 | 91043879 | 91044029 |
| chr1 | 91044180 | 91044587 |
| chr1 | 91049355 | 91049616 |
| chr1 | 91052674 | 91053222 |
| chr1 | 91053222 | 91053580 |
| chr1 | 91053594 | 91053992 |
| chr1 | 91056422 | 91056765 |
| chr1 | 91062250 | 91062716 |
| chr1 | 91063502 | 91063713 |

|      |          |          |
|------|----------|----------|
| chr1 | 91064849 | 91064999 |
| chr1 | 91065228 | 91065407 |
| chr1 | 91065659 | 91065981 |
| chr1 | 91069701 | 91069973 |
| chr1 | 91082102 | 91082268 |
| chr1 | 91082268 | 91082410 |
| chr1 | 91084095 | 91084284 |
| chr1 | 91088073 | 91088385 |
| chr1 | 91088385 | 91088739 |
| chr1 | 91089228 | 91089569 |
| chr1 | 91094801 | 91095011 |
| chr1 | 91095011 | 91095209 |
| chr1 | 91095209 | 91095705 |
| chr1 | 91095897 | 91096082 |
| chr1 | 91097285 | 91097735 |
| chr1 | 91098781 | 91099180 |
| chr1 | 91104388 | 91104679 |
| chr1 | 91108861 | 91109302 |
| chr1 | 91109302 | 91109722 |
| chr1 | 91125967 | 91126332 |
| chr1 | 91126945 | 91127236 |
| chr1 | 91135988 | 91136145 |
| chr1 | 91136515 | 91136729 |
| chr1 | 91136815 | 91137523 |
| chr1 | 91137628 | 91137822 |
| chr1 | 91138549 | 91138797 |
| chr1 | 91160750 | 91160900 |
| chr1 | 91166948 | 91167202 |
| chr1 | 91175137 | 91175306 |
| chr1 | 91179112 | 91179703 |
| chr1 | 91179841 | 91180305 |
| chr1 | 91180399 | 91180601 |
| chr1 | 91180611 | 91181082 |
| chr1 | 91181364 | 91181529 |
| chr1 | 91193071 | 91193730 |
| chr1 | 91205680 | 91205988 |
| chr1 | 91210882 | 91211475 |
| chr1 | 91216094 | 91216266 |
| chr1 | 91216604 | 91216807 |
| chr1 | 91219539 | 91220081 |
| chr1 | 91220463 | 91220636 |
| chr1 | 91230664 | 91231126 |

|      |          |          |
|------|----------|----------|
| chr1 | 91231199 | 91231465 |
| chr1 | 91233538 | 91233719 |
| chr1 | 91239841 | 91240125 |
| chr1 | 91240125 | 91240360 |
| chr1 | 91240477 | 91240673 |
| chr1 | 91240685 | 91241280 |
| chr1 | 91248258 | 91248507 |
| chr1 | 91248881 | 91249081 |
| chr1 | 91249913 | 91250362 |
| chr1 | 91250362 | 91250683 |
| chr1 | 91252048 | 91252251 |
| chr1 | 91257382 | 91257604 |
| chr1 | 91257856 | 91258192 |
| chr1 | 91258192 | 91258493 |
| chr1 | 91259875 | 91260134 |
| chr1 | 91262508 | 91262950 |
| chr1 | 91263528 | 91263862 |
| chr1 | 91272238 | 91272690 |
| chr1 | 91278332 | 91278840 |
| chr1 | 91278859 | 91279182 |
| chr1 | 91279182 | 91279442 |
| chr1 | 91279751 | 91280019 |
| chr1 | 91297876 | 91298662 |
| chr1 | 91304075 | 91304416 |
| chr1 | 91304683 | 91304889 |
| chr1 | 91320008 | 91320159 |
| chr1 | 91322265 | 91322459 |
| chr1 | 91324779 | 91324972 |
| chr1 | 91339161 | 91339337 |
| chr1 | 91344985 | 91345226 |
| chr1 | 91345235 | 91345673 |
| chr1 | 91346801 | 91346995 |
| chr1 | 91346995 | 91347268 |
| chr1 | 91352185 | 91352490 |
| chr1 | 91352490 | 91352698 |
| chr1 | 91352698 | 91352942 |
| chr1 | 91356193 | 91356811 |
| chr1 | 91362106 | 91362525 |
| chr1 | 91366210 | 91366584 |
| chr1 | 91366584 | 91366916 |
| chr1 | 91366916 | 91367237 |
| chr1 | 91367344 | 91367510 |

|      |          |          |
|------|----------|----------|
| chr1 | 91377734 | 91377897 |
| chr1 | 91380400 | 91380808 |
| chr1 | 91380810 | 91380980 |
| chr1 | 91398072 | 91398453 |
| chr1 | 91398453 | 91398666 |
| chr1 | 91398666 | 91399164 |
| chr1 | 91405030 | 91405387 |
| chr1 | 91405428 | 91405675 |
| chr1 | 91407895 | 91408076 |
| chr1 | 91412607 | 91413061 |
| chr1 | 91413061 | 91413668 |
| chr1 | 91414170 | 91414352 |
| chr1 | 91422030 | 91422247 |
| chr1 | 91422247 | 91422432 |
| chr1 | 91422432 | 91422583 |
| chr1 | 91422583 | 91422792 |
| chr1 | 91428588 | 91428951 |
| chr1 | 91433870 | 91434105 |
| chr1 | 91437957 | 91438107 |
| chr1 | 91442231 | 91442515 |
| chr1 | 91442567 | 91442805 |
| chr1 | 91444466 | 91444651 |
| chr1 | 91456530 | 91456798 |
| chr1 | 91457788 | 91458045 |
| chr1 | 91458175 | 91458850 |
| chr1 | 91459040 | 91459504 |
| chr1 | 91459504 | 91459870 |
| chr1 | 91483363 | 91483645 |
| chr1 | 91483738 | 91484056 |
| chr1 | 91485032 | 91485326 |
| chr1 | 91490172 | 91490792 |
| chr1 | 91492843 | 91493042 |
| chr1 | 91494383 | 91494738 |
| chr1 | 91494738 | 91495008 |
| chr1 | 91495008 | 91495139 |
| chr1 | 91523828 | 91524077 |
| chr1 | 91539688 | 91540077 |
| chr1 | 91540188 | 91541024 |
| chr1 | 91563102 | 91563561 |
| chr1 | 91564096 | 91564324 |
| chr1 | 91574294 | 91574540 |
| chr1 | 91577881 | 91578188 |

|      |          |          |
|------|----------|----------|
| chr1 | 91578188 | 91578476 |
| chr1 | 91590033 | 91590214 |
| chr1 | 91600688 | 91600978 |
| chr1 | 91612805 | 91613351 |
| chr1 | 91636618 | 91636895 |
| chr1 | 91640602 | 91640811 |
| chr1 | 91663349 | 91663707 |
| chr1 | 91663853 | 91664138 |
| chr1 | 91664613 | 91664879 |
| chr1 | 91674083 | 91674347 |
| chr1 | 91674347 | 91674603 |
| chr1 | 91674603 | 91674835 |
| chr1 | 91682755 | 91683035 |
| chr1 | 91683137 | 91683287 |
| chr1 | 91691743 | 91691924 |
| chr1 | 91692439 | 91692718 |
| chr1 | 91692718 | 91693035 |
| chr1 | 91693035 | 91693308 |
| chr1 | 91713259 | 91713409 |
| chr1 | 91732618 | 91732924 |
| chr1 | 91743036 | 91743235 |
| chr1 | 91755160 | 91755397 |
| chr1 | 91768143 | 91768357 |
| chr1 | 91815761 | 91815911 |
| chr1 | 91816118 | 91816412 |
| chr1 | 91816449 | 91817187 |
| chr1 | 91822405 | 91822720 |
| chr1 | 91823405 | 91823959 |
| chr1 | 91828277 | 91828441 |
| chr1 | 91828819 | 91829061 |
| chr1 | 91872297 | 91872754 |
| chr1 | 91874694 | 91874992 |
| chr1 | 91875095 | 91875285 |
| chr1 | 91883086 | 91883312 |
| chr1 | 91883312 | 91883519 |
| chr1 | 91897171 | 91897399 |
| chr1 | 91905368 | 91905603 |
| chr1 | 91905603 | 91905794 |
| chr1 | 91912261 | 91912557 |
| chr1 | 91913872 | 91914276 |
| chr1 | 91941200 | 91941420 |
| chr1 | 91941420 | 91941836 |



|      |          |          |
|------|----------|----------|
| chr1 | 91944800 | 91945261 |
| chr1 | 91945261 | 91945707 |
| chr1 | 91947657 | 91947814 |
| chr1 | 91952794 | 91953105 |
| chr1 | 91956120 | 91956627 |
| chr1 | 91962332 | 91962586 |
| chr1 | 91969119 | 91969335 |
| chr1 | 91978528 | 91978783 |
| chr1 | 92025924 | 92026116 |
| chr1 | 92042280 | 92042562 |
| chr1 | 92048881 | 92049263 |
| chr1 | 92050814 | 92051067 |
| chr1 | 92051067 | 92051452 |
| chr1 | 92052846 | 92053159 |
| chr1 | 92064170 | 92064859 |
| chr1 | 92073864 | 92074077 |
| chr1 | 92075343 | 92075591 |
| chr1 | 92076323 | 92076609 |
| chr1 | 92086239 | 92086472 |
| chr1 | 92086763 | 92087352 |
| chr1 | 92087636 | 92087786 |
| chr1 | 92087867 | 92088079 |
| chr1 | 92089157 | 92089369 |
| chr1 | 92119260 | 92119551 |
| chr1 | 92179949 | 92180436 |
| chr1 | 92180436 | 92180712 |
| chr1 | 92180712 | 92181089 |
| chr1 | 92195757 | 92196273 |
| chr1 | 92215396 | 92215697 |
| chr1 | 92232489 | 92232800 |
| chr1 | 92252019 | 92252230 |
| chr1 | 92263308 | 92263556 |
| chr1 | 92270362 | 92270650 |
| chr1 | 92270710 | 92271065 |
| chr1 | 92271985 | 92272317 |
| chr1 | 92272317 | 92272660 |
| chr1 | 92281633 | 92281887 |
| chr1 | 92283480 | 92283630 |
| chr1 | 92316402 | 92316649 |
| chr1 | 92348382 | 92348651 |
| chr1 | 92360399 | 92360616 |
| chr1 | 92371673 | 92371925 |

|      |          |          |
|------|----------|----------|
| chr1 | 92378952 | 92379471 |
| chr1 | 92379471 | 92379775 |
| chr1 | 92405246 | 92405427 |
| chr1 | 92405873 | 92406080 |
| chr1 | 92440166 | 92440424 |
| chr1 | 92453862 | 92454012 |
| chr1 | 92473014 | 92473200 |
| chr1 | 92473249 | 92473461 |
| chr1 | 92473461 | 92473659 |
| chr1 | 92473659 | 92473839 |
| chr1 | 92473839 | 92474043 |
| chr1 | 92474043 | 92474321 |
| chr1 | 92474321 | 92474583 |
| chr1 | 92480176 | 92480369 |
| chr1 | 92481202 | 92481354 |
| chr1 | 92484523 | 92484797 |
| chr1 | 92537142 | 92537297 |
| chr1 | 92545996 | 92546180 |
| chr1 | 92611109 | 92611330 |
| chr1 | 92615903 | 92616111 |
| chr1 | 92616111 | 92616469 |
| chr1 | 92616469 | 92616826 |
| chr1 | 92641262 | 92641450 |
| chr1 | 92641484 | 92642227 |
| chr1 | 92647694 | 92648121 |
| chr1 | 92648144 | 92648352 |
| chr1 | 92648352 | 92648545 |
| chr1 | 92648798 | 92649081 |
| chr1 | 92652667 | 92652864 |
| chr1 | 92653332 | 92653482 |
| chr1 | 92654070 | 92654236 |
| chr1 | 92654501 | 92654781 |
| chr1 | 92654781 | 92655089 |
| chr1 | 92663145 | 92663348 |
| chr1 | 92669437 | 92669796 |
| chr1 | 92670299 | 92670449 |
| chr1 | 92677797 | 92678035 |
| chr1 | 92696898 | 92697164 |
| chr1 | 92699051 | 92699629 |
| chr1 | 92708052 | 92708279 |
| chr1 | 92712382 | 92712944 |
| chr1 | 92718091 | 92718448 |

|      |          |          |
|------|----------|----------|
| chr1 | 92725110 | 92725386 |
| chr1 | 92742982 | 92743244 |
| chr1 | 92744816 | 92745184 |
| chr1 | 92745280 | 92745608 |
| chr1 | 92745608 | 92745901 |
| chr1 | 92751567 | 92752351 |
| chr1 | 92769034 | 92769572 |
| chr1 | 92769572 | 92769923 |
| chr1 | 92775348 | 92775501 |
| chr1 | 92779307 | 92779470 |
| chr1 | 92785426 | 92785777 |
| chr1 | 92786966 | 92787661 |
| chr1 | 92790276 | 92790501 |
| chr1 | 92791203 | 92791353 |
| chr1 | 92799556 | 92800248 |
| chr1 | 92800267 | 92800449 |
| chr1 | 92805246 | 92805636 |
| chr1 | 92806612 | 92807200 |
| chr1 | 92809666 | 92809922 |
| chr1 | 92811833 | 92812230 |
| chr1 | 92815917 | 92816217 |
| chr1 | 92831102 | 92831473 |
| chr1 | 92831473 | 92831865 |
| chr1 | 92831865 | 92832157 |
| chr1 | 92832157 | 92832336 |
| chr1 | 92832336 | 92832554 |
| chr1 | 92832681 | 92832961 |
| chr1 | 92834022 | 92834294 |
| chr1 | 92839978 | 92840129 |
| chr1 | 92840345 | 92840583 |
| chr1 | 92849593 | 92849766 |
| chr1 | 92861077 | 92861235 |
| chr1 | 92863274 | 92863432 |
| chr1 | 92875704 | 92875869 |
| chr1 | 92883402 | 92883776 |
| chr1 | 92883784 | 92883934 |
| chr1 | 92889292 | 92889529 |
| chr1 | 92895138 | 92895439 |
| chr1 | 92902829 | 92903083 |
| chr1 | 92903715 | 92904176 |
| chr1 | 92906721 | 92907181 |
| chr1 | 92907181 | 92907601 |

|      |          |          |
|------|----------|----------|
| chr1 | 92910424 | 92910899 |
| chr1 | 92910979 | 92911234 |
| chr1 | 92911892 | 92912066 |
| chr1 | 92912383 | 92912606 |
| chr1 | 92919515 | 92919667 |
| chr1 | 92924882 | 92925079 |
| chr1 | 92934161 | 92934525 |
| chr1 | 92934525 | 92935042 |
| chr1 | 92944976 | 92945126 |
| chr1 | 92949514 | 92949749 |
| chr1 | 92956640 | 92957140 |
| chr1 | 92957203 | 92957404 |
| chr1 | 92971912 | 92972205 |
| chr1 | 92972937 | 92973175 |
| chr1 | 92978575 | 92978894 |
| chr1 | 93006132 | 93006363 |
| chr1 | 93008494 | 93008726 |
| chr1 | 93008843 | 93008996 |
| chr1 | 93009064 | 93009518 |
| chr1 | 93014472 | 93014785 |
| chr1 | 93015491 | 93015704 |
| chr1 | 93017177 | 93017428 |
| chr1 | 93023428 | 93023641 |
| chr1 | 93056571 | 93056748 |
| chr1 | 93062258 | 93062544 |
| chr1 | 93062544 | 93062778 |
| chr1 | 93063531 | 93063846 |
| chr1 | 93063846 | 93064195 |
| chr1 | 93081018 | 93081258 |
| chr1 | 93100221 | 93100539 |
| chr1 | 93100539 | 93100900 |
| chr1 | 93100900 | 93101151 |
| chr1 | 93101151 | 93101496 |
| chr1 | 93101589 | 93102175 |
| chr1 | 93107605 | 93107798 |
| chr1 | 93115068 | 93115507 |
| chr1 | 93128796 | 93129022 |
| chr1 | 93130135 | 93130604 |
| chr1 | 93130631 | 93131172 |
| chr1 | 93139714 | 93140099 |
| chr1 | 93142973 | 93143501 |
| chr1 | 93146244 | 93146493 |

|      |          |          |
|------|----------|----------|
| chr1 | 93153015 | 93153355 |
| chr1 | 93159933 | 93160218 |
| chr1 | 93160218 | 93160523 |
| chr1 | 93160523 | 93160811 |
| chr1 | 93160811 | 93161148 |
| chr1 | 93161489 | 93161684 |
| chr1 | 93161847 | 93162310 |
| chr1 | 93166367 | 93166719 |
| chr1 | 93166719 | 93167098 |
| chr1 | 93168333 | 93168627 |
| chr1 | 93173412 | 93173685 |
| chr1 | 93173685 | 93173985 |
| chr1 | 93173985 | 93174419 |
| chr1 | 93174460 | 93174740 |
| chr1 | 93181867 | 93182145 |
| chr1 | 93183978 | 93184529 |
| chr1 | 93187992 | 93188611 |
| chr1 | 93191010 | 93191274 |
| chr1 | 93193755 | 93193935 |
| chr1 | 93197113 | 93197384 |
| chr1 | 93197436 | 93197662 |
| chr1 | 93200119 | 93200552 |
| chr1 | 93206188 | 93206353 |
| chr1 | 93206353 | 93206557 |
| chr1 | 93207686 | 93207880 |
| chr1 | 93210379 | 93210548 |
| chr1 | 93223998 | 93224324 |
| chr1 | 93229168 | 93229934 |
| chr1 | 93235467 | 93236077 |
| chr1 | 93236077 | 93236541 |
| chr1 | 93236541 | 93236805 |
| chr1 | 93245369 | 93245542 |
| chr1 | 93246236 | 93246406 |
| chr1 | 93258844 | 93259212 |
| chr1 | 93261592 | 93262030 |
| chr1 | 93268339 | 93268590 |
| chr1 | 93270492 | 93270904 |
| chr1 | 93270904 | 93271299 |
| chr1 | 93272571 | 93272818 |
| chr1 | 93284477 | 93284627 |
| chr1 | 93286278 | 93286471 |
| chr1 | 93289715 | 93289930 |

|      |          |          |
|------|----------|----------|
| chr1 | 93289930 | 93290168 |
| chr1 | 93299772 | 93300183 |
| chr1 | 93305513 | 93306102 |
| chr1 | 93322407 | 93322686 |
| chr1 | 93326344 | 93326578 |
| chr1 | 93326578 | 93327015 |
| chr1 | 93334431 | 93334921 |
| chr1 | 93334921 | 93335237 |
| chr1 | 93342509 | 93343010 |
| chr1 | 93343010 | 93343385 |
| chr1 | 93343385 | 93343943 |
| chr1 | 93372815 | 93373026 |
| chr1 | 93373774 | 93373961 |
| chr1 | 93375066 | 93375216 |
| chr1 | 93377095 | 93377340 |
| chr1 | 93379201 | 93379417 |
| chr1 | 93387684 | 93387998 |
| chr1 | 93389004 | 93389219 |
| chr1 | 93392093 | 93392566 |
| chr1 | 93392566 | 93392811 |
| chr1 | 93400808 | 93401092 |
| chr1 | 93401437 | 93402190 |
| chr1 | 93444781 | 93445082 |
| chr1 | 93445082 | 93445322 |
| chr1 | 93445322 | 93445551 |
| chr1 | 93445551 | 93445822 |
| chr1 | 93445822 | 93446036 |
| chr1 | 93446036 | 93446202 |
| chr1 | 93477905 | 93478211 |
| chr1 | 93478211 | 93478666 |
| chr1 | 93478682 | 93479447 |
| chr1 | 93506984 | 93507259 |
| chr1 | 93511488 | 93511820 |
| chr1 | 93511820 | 93512238 |
| chr1 | 93512238 | 93512658 |
| chr1 | 93529142 | 93529492 |
| chr1 | 93529506 | 93529658 |
| chr1 | 93529780 | 93530203 |
| chr1 | 93530203 | 93530531 |
| chr1 | 93532632 | 93532952 |
| chr1 | 93563315 | 93563553 |
| chr1 | 93578135 | 93578344 |

|      |          |          |
|------|----------|----------|
| chr1 | 93607837 | 93607988 |
| chr1 | 93611347 | 93611594 |
| chr1 | 93618243 | 93618417 |
| chr1 | 93618426 | 93618682 |
| chr1 | 93634559 | 93634777 |
| chr1 | 93634983 | 93635544 |
| chr1 | 93635544 | 93635935 |
| chr1 | 93635935 | 93636241 |
| chr1 | 93636241 | 93636511 |
| chr1 | 93654422 | 93654609 |
| chr1 | 93654835 | 93655162 |
| chr1 | 93655162 | 93655407 |
| chr1 | 93656684 | 93657198 |
| chr1 | 93667816 | 93668052 |
| chr1 | 93668676 | 93669014 |
| chr1 | 93669014 | 93669455 |
| chr1 | 93674334 | 93674560 |
| chr1 | 93678550 | 93678702 |
| chr1 | 93680120 | 93680708 |
| chr1 | 93685380 | 93685735 |
| chr1 | 93685735 | 93686136 |
| chr1 | 93686240 | 93686495 |
| chr1 | 93686495 | 93686972 |
| chr1 | 93692068 | 93692304 |
| chr1 | 93698534 | 93698762 |
| chr1 | 93705394 | 93705732 |
| chr1 | 93705732 | 93706065 |
| chr1 | 93706065 | 93706384 |
| chr1 | 93715610 | 93715768 |
| chr1 | 93717312 | 93717759 |
| chr1 | 93725234 | 93725566 |
| chr1 | 93725716 | 93726081 |
| chr1 | 93726081 | 93726460 |
| chr1 | 93726954 | 93727322 |
| chr1 | 93740691 | 93740964 |
| chr1 | 93743003 | 93743201 |
| chr1 | 93748553 | 93748961 |
| chr1 | 93753817 | 93754151 |
| chr1 | 93754151 | 93754443 |
| chr1 | 93754443 | 93754778 |
| chr1 | 93754778 | 93755021 |
| chr1 | 93755021 | 93755479 |

|      |          |          |
|------|----------|----------|
| chr1 | 93763621 | 93763782 |
| chr1 | 93771635 | 93771835 |
| chr1 | 93773740 | 93773977 |
| chr1 | 93801682 | 93802148 |
| chr1 | 93803489 | 93804126 |
| chr1 | 93804126 | 93804492 |
| chr1 | 93824661 | 93824829 |
| chr1 | 93824872 | 93825028 |
| chr1 | 93825041 | 93825364 |
| chr1 | 93825364 | 93825722 |
| chr1 | 93825813 | 93826007 |
| chr1 | 93832792 | 93833032 |
| chr1 | 93835874 | 93836259 |
| chr1 | 93836283 | 93836494 |
| chr1 | 93846037 | 93846285 |
| chr1 | 93853878 | 93854077 |
| chr1 | 93854158 | 93854414 |
| chr1 | 93857098 | 93857417 |
| chr1 | 93857417 | 93857789 |
| chr1 | 93897532 | 93897707 |
| chr1 | 93909306 | 93909531 |
| chr1 | 93911941 | 93912193 |
| chr1 | 93919780 | 93920117 |
| chr1 | 93920932 | 93921217 |
| chr1 | 93966576 | 93966932 |
| chr1 | 93978403 | 93978630 |
| chr1 | 93980997 | 93981244 |
| chr1 | 94034920 | 94035219 |
| chr1 | 94035219 | 94035648 |
| chr1 | 94056059 | 94056254 |
| chr1 | 94079148 | 94079438 |
| chr1 | 94149939 | 94150360 |
| chr1 | 94366638 | 94366950 |
| chr1 | 94469838 | 94470195 |
| chr1 | 94499760 | 94499968 |
| chr1 | 94537143 | 94537408 |
| chr1 | 94938149 | 94938350 |
| chr1 | 94949917 | 94950266 |
| chr1 | 95074336 | 95074608 |
| chr1 | 95308504 | 95308716 |
| chr1 | 95313430 | 95313737 |
| chr1 | 95313737 | 95313974 |



|      |          |          |
|------|----------|----------|
| chr1 | 95313974 | 95314501 |
| chr1 | 95367669 | 95367869 |
| chr1 | 95367869 | 95368073 |
| chr1 | 95422408 | 95422558 |
| chr1 | 95433093 | 95433340 |
| chr1 | 95451871 | 95452119 |
| chr1 | 95467044 | 95467251 |
| chr1 | 95467351 | 95467650 |
| chr1 | 95468099 | 95468606 |
| chr1 | 95474875 | 95475256 |
| chr1 | 95636733 | 95637011 |
| chr1 | 95665897 | 95666067 |
| chr1 | 95666905 | 95667183 |
| chr1 | 95667310 | 95668009 |
| chr1 | 95668013 | 95668170 |
| chr1 | 95707066 | 95707285 |
| chr1 | 95707367 | 95707775 |
| chr1 | 95720706 | 95720969 |
| chr1 | 95830818 | 95831044 |
| chr1 | 96000889 | 96001111 |
| chr1 | 96129286 | 96129462 |
| chr1 | 96799147 | 96799450 |
| chr1 | 96799450 | 96799757 |
| chr1 | 96805220 | 96805897 |
| chr1 | 96813937 | 96814237 |
| chr1 | 96814257 | 96814407 |
| chr1 | 96871813 | 96872095 |
| chr1 | 96872095 | 96872591 |
| chr1 | 97260388 | 97260547 |
| chr1 | 97263039 | 97263222 |
| chr1 | 97577071 | 97577465 |
| chr1 | 97587604 | 97587924 |
| chr1 | 97604837 | 97605059 |
| chr1 | 97613836 | 97614228 |
| chr1 | 97647126 | 97647362 |
| chr1 | 97650168 | 97650360 |
| chr1 | 97657278 | 97657552 |
| chr1 | 97660680 | 97660947 |
| chr1 | 97660947 | 97661175 |
| chr1 | 97661175 | 97661362 |
| chr1 | 97661362 | 97661580 |
| chr1 | 97661580 | 97661868 |

|      |          |          |
|------|----------|----------|
| chr1 | 97661868 | 97662304 |
| chr1 | 97688845 | 97689087 |
| chr1 | 97726803 | 97727035 |
| chr1 | 97727283 | 97727467 |
| chr1 | 97759869 | 97760216 |
| chr1 | 97769294 | 97769571 |
| chr1 | 97769635 | 97769921 |
| chr1 | 97769921 | 97770253 |
| chr1 | 97770253 | 97770572 |
| chr1 | 97770572 | 97770774 |
| chr1 | 97771251 | 97771436 |
| chr1 | 97799953 | 97800183 |
| chr1 | 97872150 | 97872394 |
| chr1 | 97873571 | 97873975 |
| chr1 | 97873975 | 97874289 |
| chr1 | 97910632 | 97910939 |
| chr1 | 97910939 | 97911234 |
| chr1 | 97911234 | 97911490 |
| chr1 | 97918284 | 97918537 |
| chr1 | 97918537 | 97918819 |
| chr1 | 97919403 | 97919822 |
| chr1 | 97963640 | 97964090 |
| chr1 | 97964929 | 97965157 |
| chr1 | 97976825 | 97977492 |
| chr1 | 97983255 | 97983540 |
| chr1 | 97992491 | 97992744 |
| chr1 | 97993215 | 97993426 |
| chr1 | 97995803 | 97995971 |
| chr1 | 97996935 | 97997568 |
| chr1 | 98002860 | 98003125 |
| chr1 | 98028994 | 98029424 |
| chr1 | 98035771 | 98036087 |
| chr1 | 98036593 | 98036825 |
| chr1 | 98038047 | 98038651 |
| chr1 | 98047626 | 98048170 |
| chr1 | 98072066 | 98072377 |
| chr1 | 98079651 | 98079993 |
| chr1 | 98083936 | 98084265 |
| chr1 | 98084649 | 98084915 |
| chr1 | 98089174 | 98089389 |
| chr1 | 98089405 | 98089704 |
| chr1 | 98089716 | 98089918 |

|      |           |           |
|------|-----------|-----------|
| chr1 | 98094753  | 98095290  |
| chr1 | 98095290  | 98095977  |
| chr1 | 98096631  | 98096877  |
| chr1 | 98147290  | 98147720  |
| chr1 | 98178609  | 98179020  |
| chr1 | 98179135  | 98179363  |
| chr1 | 98275607  | 98275812  |
| chr1 | 98304301  | 98304587  |
| chr1 | 98304817  | 98305107  |
| chr1 | 98727532  | 98727686  |
| chr1 | 98727711  | 98728220  |
| chr1 | 98730440  | 98730795  |
| chr1 | 98732738  | 98733237  |
| chr1 | 98953244  | 98953590  |
| chr1 | 99249556  | 99249757  |
| chr1 | 99772227  | 99772438  |
| chr1 | 99825353  | 99825515  |
| chr1 | 99843845  | 99844249  |
| chr1 | 99877916  | 99878263  |
| chr1 | 99881769  | 99882397  |
| chr1 | 99917790  | 99918183  |
| chr1 | 100082741 | 100082920 |
| chr1 | 100100452 | 100101005 |
| chr1 | 100101019 | 100101456 |
| chr1 | 100122532 | 100122731 |
| chr1 | 100171474 | 100172009 |
| chr1 | 100173439 | 100173594 |
| chr1 | 100173720 | 100173950 |
| chr1 | 100180036 | 100180491 |
| chr1 | 100185404 | 100185793 |
| chr1 | 100223893 | 100224193 |
| chr1 | 100231395 | 100231839 |
| chr1 | 100231839 | 100232227 |
| chr1 | 100738816 | 100739020 |
| chr1 | 100784607 | 100784828 |
| chr1 | 101133459 | 101133730 |
| chr1 | 101133921 | 101134101 |
| chr1 | 101134291 | 101134472 |
| chr1 | 101135167 | 101135317 |
| chr1 | 102628120 | 102628397 |
| chr1 | 103589863 | 103590104 |
| chr1 | 104224130 | 104224285 |

|      |           |           |
|------|-----------|-----------|
| chr1 | 104293436 | 104293744 |
| chr1 | 104333079 | 104333347 |
| chr1 | 104508423 | 104508601 |
| chr1 | 104986301 | 104986527 |
| chr1 | 104994045 | 104994222 |
| chr1 | 105179390 | 105179721 |
| chr1 | 105179721 | 105180128 |
| chr1 | 105191226 | 105191395 |
| chr1 | 105199316 | 105199665 |
| chr1 | 105291779 | 105292230 |
| chr1 | 105302323 | 105302541 |
| chr1 | 105342351 | 105342753 |
| chr1 | 105355948 | 105356378 |
| chr1 | 105356378 | 105357145 |
| chr1 | 105362887 | 105363037 |
| chr1 | 105374099 | 105374436 |
| chr1 | 105384545 | 105385105 |
| chr1 | 105418194 | 105418381 |
| chr1 | 105420542 | 105420983 |
| chr1 | 105431869 | 105432237 |
| chr1 | 105434853 | 105435418 |
| chr1 | 105442271 | 105442570 |
| chr1 | 105442900 | 105443158 |
| chr1 | 105453893 | 105454419 |
| chr1 | 105493727 | 105494020 |
| chr1 | 105555207 | 105555597 |
| chr1 | 105563273 | 105563545 |
| chr1 | 105564754 | 105565069 |
| chr1 | 105565069 | 105565420 |
| chr1 | 105663152 | 105663500 |
| chr1 | 105663500 | 105663805 |
| chr1 | 105663805 | 105664293 |
| chr1 | 105664548 | 105664713 |
| chr1 | 105669789 | 105670041 |
| chr1 | 105680688 | 105680906 |
| chr1 | 105685617 | 105685783 |
| chr1 | 105735371 | 105735528 |
| chr1 | 105742583 | 105742809 |
| chr1 | 105770829 | 105771136 |
| chr1 | 105780154 | 105781124 |
| chr1 | 105781467 | 105781678 |
| chr1 | 105787131 | 105787302 |

|      |           |           |
|------|-----------|-----------|
| chr1 | 105790159 | 105790540 |
| chr1 | 105790540 | 105790847 |
| chr1 | 105801407 | 105801717 |
| chr1 | 105802300 | 105802518 |
| chr1 | 105805733 | 105805916 |
| chr1 | 105813476 | 105813626 |
| chr1 | 105825701 | 105825854 |
| chr1 | 105866703 | 105867214 |
| chr1 | 105867214 | 105867532 |
| chr1 | 105881093 | 105881249 |
| chr1 | 105886471 | 105886687 |
| chr1 | 105891079 | 105891359 |
| chr1 | 105906158 | 105906464 |
| chr1 | 105906464 | 105906998 |
| chr1 | 105907403 | 105907721 |
| chr1 | 105922685 | 105922867 |
| chr1 | 105923041 | 105923301 |
| chr1 | 105924936 | 105925179 |
| chr1 | 105925357 | 105925819 |
| chr1 | 105925819 | 105926079 |
| chr1 | 105926096 | 105926298 |
| chr1 | 105926419 | 105926569 |
| chr1 | 105930886 | 105931239 |
| chr1 | 105947284 | 105947570 |
| chr1 | 105971796 | 105971946 |
| chr1 | 105977815 | 105978040 |
| chr1 | 105981307 | 105981595 |
| chr1 | 105982590 | 105982831 |
| chr1 | 105983052 | 105983332 |
| chr1 | 105984129 | 105984545 |
| chr1 | 105990095 | 105990895 |
| chr1 | 105991009 | 105991201 |
| chr1 | 105991291 | 105991729 |
| chr1 | 105993313 | 105993519 |
| chr1 | 105993894 | 105994153 |
| chr1 | 106000346 | 106000496 |
| chr1 | 106000713 | 106001149 |
| chr1 | 106007672 | 106007875 |
| chr1 | 106037012 | 106037451 |
| chr1 | 106043093 | 106043451 |
| chr1 | 106043451 | 106043844 |
| chr1 | 106071313 | 106071564 |

|      |           |           |
|------|-----------|-----------|
| chr1 | 106109082 | 106109313 |
| chr1 | 106144280 | 106144526 |
| chr1 | 106144526 | 106144942 |
| chr1 | 106152857 | 106153039 |
| chr1 | 106160947 | 106161346 |
| chr1 | 106162690 | 106162886 |
| chr1 | 106163435 | 106163776 |
| chr1 | 106168857 | 106169169 |
| chr1 | 106171234 | 106171564 |
| chr1 | 106171564 | 106171895 |
| chr1 | 106171895 | 106172203 |
| chr1 | 106172388 | 106172656 |
| chr1 | 106172656 | 106172870 |
| chr1 | 106178059 | 106178229 |
| chr1 | 106187477 | 106187768 |
| chr1 | 106187768 | 106188029 |
| chr1 | 106190817 | 106190967 |
| chr1 | 106210876 | 106211169 |
| chr1 | 106211169 | 106211578 |
| chr1 | 106213996 | 106214151 |
| chr1 | 106220460 | 106220784 |
| chr1 | 106220830 | 106221236 |
| chr1 | 106221538 | 106221715 |
| chr1 | 106230320 | 106230606 |
| chr1 | 106240553 | 106240830 |
| chr1 | 106241751 | 106242019 |
| chr1 | 106242107 | 106242446 |
| chr1 | 106278631 | 106278878 |
| chr1 | 106307448 | 106307635 |
| chr1 | 106308161 | 106308329 |
| chr1 | 106314528 | 106314767 |
| chr1 | 106316960 | 106317207 |
| chr1 | 106320687 | 106320933 |
| chr1 | 106324538 | 106324983 |
| chr1 | 106324983 | 106325432 |
| chr1 | 106326868 | 106327032 |
| chr1 | 106339620 | 106339818 |
| chr1 | 106346829 | 106347025 |
| chr1 | 106352808 | 106353090 |
| chr1 | 106353164 | 106353384 |
| chr1 | 106367386 | 106367608 |
| chr1 | 106378938 | 106379209 |

|      |           |           |
|------|-----------|-----------|
| chr1 | 106389824 | 106390019 |
| chr1 | 106394675 | 106395189 |
| chr1 | 106395540 | 106395825 |
| chr1 | 106400795 | 106401225 |
| chr1 | 106401225 | 106401633 |
| chr1 | 106403193 | 106403811 |
| chr1 | 106407046 | 106407391 |
| chr1 | 106407391 | 106407701 |
| chr1 | 106407713 | 106408424 |
| chr1 | 106408740 | 106409014 |
| chr1 | 106409014 | 106409237 |
| chr1 | 106409466 | 106409750 |
| chr1 | 106423395 | 106423573 |
| chr1 | 106425619 | 106425870 |
| chr1 | 106426322 | 106426697 |
| chr1 | 106430773 | 106431150 |
| chr1 | 106431235 | 106431744 |
| chr1 | 106449774 | 106450123 |
| chr1 | 106460990 | 106461317 |
| chr1 | 106477663 | 106478524 |
| chr1 | 106479057 | 106479262 |
| chr1 | 106500869 | 106501309 |
| chr1 | 106501533 | 106501755 |
| chr1 | 106501830 | 106502027 |
| chr1 | 106503131 | 106503404 |
| chr1 | 106511628 | 106511929 |
| chr1 | 106513309 | 106513552 |
| chr1 | 106513552 | 106513859 |
| chr1 | 106515640 | 106515790 |
| chr1 | 106525645 | 106525903 |
| chr1 | 106525903 | 106526174 |
| chr1 | 106526174 | 106526595 |
| chr1 | 106544744 | 106544977 |
| chr1 | 106547436 | 106547763 |
| chr1 | 106591292 | 106591706 |
| chr1 | 106628805 | 106629030 |
| chr1 | 106629448 | 106629861 |
| chr1 | 106629898 | 106630159 |
| chr1 | 106630159 | 106630618 |
| chr1 | 106700550 | 106701031 |
| chr1 | 106712273 | 106712485 |
| chr1 | 106712485 | 106712706 |

|      |           |           |
|------|-----------|-----------|
| chr1 | 106713704 | 106714942 |
| chr1 | 106735655 | 106735865 |
| chr1 | 106738144 | 106738381 |
| chr1 | 106758764 | 106759463 |
| chr1 | 106759463 | 106760061 |
| chr1 | 106765869 | 106766069 |
| chr1 | 106796156 | 106796507 |
| chr1 | 106796507 | 106796907 |
| chr1 | 106797119 | 106797367 |
| chr1 | 106797369 | 106797583 |
| chr1 | 106799508 | 106799687 |
| chr1 | 106814952 | 106815142 |
| chr1 | 106818454 | 106818635 |
| chr1 | 106839508 | 106839796 |
| chr1 | 106839796 | 106840135 |
| chr1 | 106857420 | 106857805 |
| chr1 | 106860862 | 106861274 |
| chr1 | 106861312 | 106861486 |
| chr1 | 106861495 | 106861645 |
| chr1 | 106865432 | 106865587 |
| chr1 | 106876205 | 106876422 |
| chr1 | 106883421 | 106883633 |
| chr1 | 106883850 | 106884208 |
| chr1 | 106901536 | 106901782 |
| chr1 | 106942134 | 106942455 |
| chr1 | 106944934 | 106945168 |
| chr1 | 107000544 | 107000735 |
| chr1 | 107130091 | 107130343 |
| chr1 | 107214759 | 107215013 |
| chr1 | 107250792 | 107250960 |
| chr1 | 107362140 | 107362290 |
| chr1 | 107365379 | 107365838 |
| chr1 | 107366103 | 107366253 |
| chr1 | 107384595 | 107384829 |
| chr1 | 107414536 | 107415025 |
| chr1 | 107471899 | 107472116 |
| chr1 | 107481515 | 107481826 |
| chr1 | 107488252 | 107489024 |
| chr1 | 107495567 | 107495839 |
| chr1 | 107496932 | 107497118 |
| chr1 | 107499037 | 107499373 |
| chr1 | 107500773 | 107500957 |



|      |           |           |
|------|-----------|-----------|
| chr1 | 107501990 | 107502198 |
| chr1 | 107502198 | 107502392 |
| chr1 | 107505300 | 107505521 |
| chr1 | 107505856 | 107506467 |
| chr1 | 107511105 | 107511610 |
| chr1 | 107589797 | 107590150 |
| chr1 | 107590150 | 107590454 |
| chr1 | 107590454 | 107590685 |
| chr1 | 107591078 | 107591431 |
| chr1 | 107608996 | 107609213 |
| chr1 | 107609598 | 107609875 |
| chr1 | 107810019 | 107810346 |
| chr1 | 107822181 | 107822331 |
| chr1 | 107836764 | 107836951 |
| chr1 | 107967240 | 107967484 |
| chr1 | 108046267 | 108046533 |
| chr1 | 108117123 | 108117435 |
| chr1 | 108131207 | 108131549 |
| chr1 | 108131626 | 108131886 |
| chr1 | 108132002 | 108132398 |
| chr1 | 108409014 | 108409185 |
| chr1 | 108415819 | 108416019 |
| chr1 | 109132566 | 109132766 |
| chr1 | 109512757 | 109512919 |
| chr1 | 110330123 | 110330375 |
| chr1 | 110483483 | 110483851 |
| chr1 | 110745332 | 110745572 |
| chr1 | 110796063 | 110796403 |
| chr1 | 111373134 | 111373397 |
| chr1 | 111864018 | 111864247 |
| chr1 | 111864254 | 111864746 |
| chr1 | 111864746 | 111865193 |
| chr1 | 112245429 | 112245688 |
| chr1 | 112486134 | 112486304 |
| chr1 | 112748507 | 112748855 |
| chr1 | 112750670 | 112751082 |
| chr1 | 113161319 | 113161522 |
| chr1 | 113258370 | 113258525 |
| chr1 | 113259531 | 113259687 |
| chr1 | 113259891 | 113260041 |
| chr1 | 113270875 | 113271287 |
| chr1 | 113287881 | 113288214 |

|      |           |           |
|------|-----------|-----------|
| chr1 | 113288214 | 113288914 |
| chr1 | 113296193 | 113296351 |
| chr1 | 113297765 | 113298339 |
| chr1 | 113302652 | 113302809 |
| chr1 | 113373180 | 113373582 |
| chr1 | 113482480 | 113482800 |
| chr1 | 113530453 | 113530864 |
| chr1 | 113628960 | 113629169 |
| chr1 | 114039405 | 114039770 |
| chr1 | 114186349 | 114186573 |
| chr1 | 114644177 | 114644372 |
| chr1 | 115058526 | 115058769 |
| chr1 | 115174277 | 115174475 |
| chr1 | 115488060 | 115488225 |
| chr1 | 115511684 | 115511961 |
| chr1 | 115511961 | 115512234 |
| chr1 | 115512781 | 115512976 |
| chr1 | 116415061 | 116415574 |
| chr1 | 116667999 | 116668194 |
| chr1 | 118012716 | 118013042 |
| chr1 | 118275248 | 118275470 |
| chr1 | 118288586 | 118288817 |
| chr1 | 118294123 | 118294586 |
| chr1 | 118310769 | 118311659 |
| chr1 | 118320791 | 118321005 |
| chr1 | 118321590 | 118321955 |
| chr1 | 118321955 | 118322383 |
| chr1 | 118325190 | 118325547 |
| chr1 | 118334813 | 118335029 |
| chr1 | 118335029 | 118335272 |
| chr1 | 118335981 | 118336131 |
| chr1 | 118343670 | 118344009 |
| chr1 | 118366384 | 118366754 |
| chr1 | 118368109 | 118368298 |
| chr1 | 118368432 | 118368594 |
| chr1 | 118368701 | 118369117 |
| chr1 | 118369117 | 118369623 |
| chr1 | 118388177 | 118388363 |
| chr1 | 118388588 | 118389117 |
| chr1 | 118389117 | 118389504 |
| chr1 | 118389504 | 118389939 |
| chr1 | 118389939 | 118390308 |

|      |           |           |
|------|-----------|-----------|
| chr1 | 118395819 | 118396038 |
| chr1 | 118398545 | 118398834 |
| chr1 | 118399533 | 118399943 |
| chr1 | 118399943 | 118400248 |
| chr1 | 118424712 | 118424985 |
| chr1 | 118424985 | 118425328 |
| chr1 | 118425328 | 118425655 |
| chr1 | 118428217 | 118428437 |
| chr1 | 118435090 | 118435271 |
| chr1 | 118440673 | 118440848 |
| chr1 | 118441156 | 118441479 |
| chr1 | 118443171 | 118443404 |
| chr1 | 118444506 | 118444726 |
| chr1 | 118444960 | 118445194 |
| chr1 | 118447185 | 118447458 |
| chr1 | 118447515 | 118447665 |
| chr1 | 118449383 | 118449785 |
| chr1 | 118449912 | 118450155 |
| chr1 | 118450210 | 118450476 |
| chr1 | 118453543 | 118453866 |
| chr1 | 118458280 | 118458630 |
| chr1 | 118458723 | 118459380 |
| chr1 | 118459380 | 118459701 |
| chr1 | 118459701 | 118460001 |
| chr1 | 118466577 | 118466753 |
| chr1 | 118476960 | 118477207 |
| chr1 | 118479225 | 118479641 |
| chr1 | 118492897 | 118493136 |
| chr1 | 118494546 | 118494938 |
| chr1 | 118497259 | 118497461 |
| chr1 | 118498199 | 118498399 |
| chr1 | 118498399 | 118498684 |
| chr1 | 118529345 | 118529495 |
| chr1 | 118558813 | 118559010 |
| chr1 | 118559010 | 118559275 |
| chr1 | 118627678 | 118628127 |
| chr1 | 118628127 | 118628528 |
| chr1 | 118630202 | 118630528 |
| chr1 | 118647983 | 118648450 |
| chr1 | 118649691 | 118649983 |
| chr1 | 118649983 | 118650289 |
| chr1 | 118650289 | 118650707 |

|      |           |           |
|------|-----------|-----------|
| chr1 | 118657120 | 118657614 |
| chr1 | 118660666 | 118661102 |
| chr1 | 118661102 | 118661395 |
| chr1 | 118661395 | 118661614 |
| chr1 | 118676567 | 118676856 |
| chr1 | 118689715 | 118689971 |
| chr1 | 118689971 | 118690444 |
| chr1 | 118690750 | 118691065 |
| chr1 | 118697189 | 118697353 |
| chr1 | 118697976 | 118698157 |
| chr1 | 118700032 | 118700309 |
| chr1 | 118711730 | 118711894 |
| chr1 | 118752938 | 118753089 |
| chr1 | 118758086 | 118758306 |
| chr1 | 118759609 | 118759915 |
| chr1 | 118767327 | 118767610 |
| chr1 | 118768075 | 118768289 |
| chr1 | 118772313 | 118772636 |
| chr1 | 118776748 | 118776951 |
| chr1 | 118807739 | 118807962 |
| chr1 | 118825157 | 118825517 |
| chr1 | 118852090 | 118852283 |
| chr1 | 118976543 | 118976969 |
| chr1 | 118993816 | 118994078 |
| chr1 | 119048034 | 119048309 |
| chr1 | 119053583 | 119053838 |
| chr1 | 119076842 | 119077021 |
| chr1 | 119082699 | 119082907 |
| chr1 | 119083718 | 119083972 |
| chr1 | 119085882 | 119086071 |
| chr1 | 119087603 | 119087907 |
| chr1 | 119093798 | 119094067 |
| chr1 | 119123062 | 119123357 |
| chr1 | 119160846 | 119161002 |
| chr1 | 119217401 | 119217712 |
| chr1 | 119234171 | 119234552 |
| chr1 | 119269038 | 119269297 |
| chr1 | 119289817 | 119290015 |
| chr1 | 119290015 | 119290210 |
| chr1 | 119290210 | 119290558 |
| chr1 | 119292094 | 119292613 |
| chr1 | 119307313 | 119307521 |

|      |           |           |
|------|-----------|-----------|
| chr1 | 119308745 | 119309073 |
| chr1 | 119309073 | 119309432 |
| chr1 | 119344091 | 119344344 |
| chr1 | 119375300 | 119375773 |
| chr1 | 119390761 | 119391073 |
| chr1 | 119404267 | 119404764 |
| chr1 | 119404764 | 119405127 |
| chr1 | 119420412 | 119420577 |
| chr1 | 119420661 | 119420833 |
| chr1 | 119420833 | 119420999 |
| chr1 | 119421009 | 119421292 |
| chr1 | 119421292 | 119421565 |
| chr1 | 119421565 | 119421799 |
| chr1 | 119421799 | 119422003 |
| chr1 | 119422003 | 119422231 |
| chr1 | 119422272 | 119422425 |
| chr1 | 119458101 | 119458254 |
| chr1 | 119458270 | 119458539 |
| chr1 | 119463461 | 119463703 |
| chr1 | 119484545 | 119484773 |
| chr1 | 119492075 | 119492485 |
| chr1 | 119492485 | 119492780 |
| chr1 | 119494425 | 119494641 |
| chr1 | 119494757 | 119495058 |
| chr1 | 119495058 | 119495333 |
| chr1 | 119504247 | 119505146 |
| chr1 | 119509529 | 119509851 |
| chr1 | 119509851 | 119510091 |
| chr1 | 119510091 | 119510292 |
| chr1 | 119513856 | 119514029 |
| chr1 | 119525609 | 119526008 |
| chr1 | 119526008 | 119526255 |
| chr1 | 119526255 | 119526608 |
| chr1 | 119534429 | 119534692 |
| chr1 | 119536219 | 119536574 |
| chr1 | 119538336 | 119538778 |
| chr1 | 119548711 | 119548979 |
| chr1 | 119548979 | 119549182 |
| chr1 | 119549442 | 119549603 |
| chr1 | 119639775 | 119640182 |
| chr1 | 119640240 | 119640391 |
| chr1 | 119642325 | 119642698 |

|      |           |           |
|------|-----------|-----------|
| chr1 | 119648274 | 119648550 |
| chr1 | 119648550 | 119648848 |
| chr1 | 119648848 | 119649221 |
| chr1 | 119649691 | 119649973 |
| chr1 | 119660577 | 119660811 |
| chr1 | 119674256 | 119674538 |
| chr1 | 119675080 | 119675277 |
| chr1 | 119794536 | 119794788 |
| chr1 | 119794916 | 119795090 |
| chr1 | 119799282 | 119799600 |
| chr1 | 119806081 | 119806293 |
| chr1 | 119836785 | 119837004 |
| chr1 | 119837004 | 119837325 |
| chr1 | 119837325 | 119837597 |
| chr1 | 119837597 | 119837896 |
| chr1 | 119891880 | 119892035 |
| chr1 | 119895018 | 119895321 |
| chr1 | 119912927 | 119913654 |
| chr1 | 119920704 | 119921109 |
| chr1 | 119921122 | 119921295 |
| chr1 | 119921295 | 119921475 |
| chr1 | 119929841 | 119930056 |
| chr1 | 119931415 | 119931744 |
| chr1 | 119965827 | 119966140 |
| chr1 | 119986629 | 119986885 |
| chr1 | 119991937 | 119992100 |
| chr1 | 119997101 | 119997358 |
| chr1 | 119997358 | 119997601 |
| chr1 | 119997792 | 119997972 |
| chr1 | 120012364 | 120012687 |
| chr1 | 120013204 | 120013428 |
| chr1 | 120032871 | 120033524 |
| chr1 | 120034761 | 120035105 |
| chr1 | 120047092 | 120047315 |
| chr1 | 120066746 | 120067000 |
| chr1 | 120073628 | 120074132 |
| chr1 | 120074132 | 120074619 |
| chr1 | 120080675 | 120081099 |
| chr1 | 120082924 | 120083275 |
| chr1 | 120083275 | 120083553 |
| chr1 | 120083937 | 120084252 |
| chr1 | 120093468 | 120093866 |

|      |           |           |
|------|-----------|-----------|
| chr1 | 120099534 | 120099856 |
| chr1 | 120105701 | 120106005 |
| chr1 | 120120106 | 120120762 |
| chr1 | 120120762 | 120121403 |
| chr1 | 120121406 | 120121575 |
| chr1 | 120124981 | 120125201 |
| chr1 | 120136037 | 120136586 |
| chr1 | 120136586 | 120136856 |
| chr1 | 120154308 | 120154542 |
| chr1 | 120156180 | 120156337 |
| chr1 | 120171863 | 120172115 |
| chr1 | 120197194 | 120197690 |
| chr1 | 120202528 | 120202691 |
| chr1 | 120231399 | 120231618 |
| chr1 | 120235683 | 120235897 |
| chr1 | 120236384 | 120236929 |
| chr1 | 120264769 | 120265590 |
| chr1 | 120276181 | 120276331 |
| chr1 | 120305822 | 120306120 |
| chr1 | 120331989 | 120332189 |
| chr1 | 120363662 | 120363931 |
| chr1 | 120430243 | 120430478 |
| chr1 | 120549358 | 120549613 |
| chr1 | 120549697 | 120550253 |
| chr1 | 120550253 | 120550489 |
| chr1 | 120574823 | 120575002 |
| chr1 | 120586544 | 120586774 |
| chr1 | 120596474 | 120596670 |
| chr1 | 120602197 | 120602385 |
| chr1 | 120602818 | 120603277 |
| chr1 | 120603277 | 120603586 |
| chr1 | 120603614 | 120603995 |
| chr1 | 120607079 | 120607293 |
| chr1 | 120654750 | 120655515 |
| chr1 | 120667485 | 120667699 |
| chr1 | 120668264 | 120668590 |
| chr1 | 120685960 | 120686134 |
| chr1 | 120757333 | 120757816 |
| chr1 | 120757816 | 120758182 |
| chr1 | 120758728 | 120759150 |
| chr1 | 120783035 | 120783197 |
| chr1 | 120812733 | 120813103 |

|      |           |           |
|------|-----------|-----------|
| chr1 | 120814475 | 120814719 |
| chr1 | 120816302 | 120816561 |
| chr1 | 120828308 | 120828493 |
| chr1 | 120828507 | 120828728 |
| chr1 | 120887156 | 120887357 |
| chr1 | 120900576 | 120900998 |
| chr1 | 120901105 | 120901314 |
| chr1 | 120901314 | 120901505 |
| chr1 | 120901705 | 120901858 |
| chr1 | 120905488 | 120905890 |
| chr1 | 120906044 | 120906372 |
| chr1 | 120906602 | 120906761 |
| chr1 | 120910535 | 120910803 |
| chr1 | 120910844 | 120911372 |
| chr1 | 120974645 | 120974896 |
| chr1 | 121012089 | 121012456 |
| chr1 | 121014151 | 121014439 |
| chr1 | 121014439 | 121014656 |
| chr1 | 121016241 | 121016498 |
| chr1 | 121034764 | 121035118 |
| chr1 | 121174597 | 121174758 |
| chr1 | 121180399 | 121180611 |
| chr1 | 121260461 | 121260684 |
| chr1 | 121280570 | 121280861 |
| chr1 | 121295230 | 121295517 |
| chr1 | 121313901 | 121314090 |
| chr1 | 121327090 | 121327248 |
| chr1 | 121327275 | 121327618 |
| chr1 | 121327618 | 121328224 |
| chr1 | 121328228 | 121328467 |
| chr1 | 121344005 | 121344335 |
| chr1 | 121346156 | 121346380 |
| chr1 | 121350643 | 121350862 |
| chr1 | 121351115 | 121351397 |
| chr1 | 121360318 | 121361086 |
| chr1 | 121366313 | 121366849 |
| chr1 | 121369603 | 121369771 |
| chr1 | 121377279 | 121377771 |
| chr1 | 121377832 | 121378233 |
| chr1 | 121380052 | 121380387 |
| chr1 | 121398049 | 121398201 |
| chr1 | 121398280 | 121398553 |



|      |           |           |
|------|-----------|-----------|
| chr1 | 121400348 | 121400577 |
| chr1 | 121419191 | 121419387 |
| chr1 | 121430901 | 121431193 |
| chr1 | 121431193 | 121431485 |
| chr1 | 121431485 | 121432017 |
| chr1 | 121441136 | 121441389 |
| chr1 | 121460173 | 121460360 |
| chr1 | 121482989 | 121483754 |
| chr1 | 121490307 | 121490571 |
| chr1 | 121497252 | 121497454 |
| chr1 | 121527605 | 121527907 |
| chr1 | 121527907 | 121528313 |
| chr1 | 121528370 | 121529017 |
| chr1 | 121549541 | 121549698 |
| chr1 | 121567530 | 121567839 |
| chr1 | 121567839 | 121568138 |
| chr1 | 121568138 | 121568403 |
| chr1 | 121653296 | 121653555 |
| chr1 | 121653555 | 121653761 |
| chr1 | 121653923 | 121654202 |
| chr1 | 121654202 | 121654470 |
| chr1 | 122021513 | 122021802 |
| chr1 | 122050177 | 122050387 |
| chr1 | 122099859 | 122100122 |
| chr1 | 122101630 | 122101916 |
| chr1 | 122101916 | 122102272 |
| chr1 | 122102361 | 122102847 |
| chr1 | 122193763 | 122193956 |
| chr1 | 122357067 | 122357315 |
| chr1 | 123134240 | 123134441 |
| chr1 | 123303659 | 123304044 |
| chr1 | 123580072 | 123580528 |
| chr1 | 123820485 | 123820645 |
| chr1 | 124453057 | 124453575 |
| chr1 | 124458574 | 124458859 |
| chr1 | 124487827 | 124488328 |
| chr1 | 124488348 | 124488915 |
| chr1 | 124496405 | 124496827 |
| chr1 | 124497346 | 124497519 |
| chr1 | 124504096 | 124504407 |
| chr1 | 124584709 | 124584916 |
| chr1 | 124602887 | 124603239 |

|      |           |           |
|------|-----------|-----------|
| chr1 | 124674519 | 124674721 |
| chr1 | 124805103 | 124805572 |
| chr1 | 124829960 | 124830275 |
| chr1 | 124885425 | 124885599 |
| chr1 | 124910712 | 124910936 |
| chr1 | 125146113 | 125146263 |
| chr1 | 125147231 | 125147489 |
| chr1 | 125176451 | 125176664 |
| chr1 | 125213745 | 125214134 |
| chr1 | 125214134 | 125214812 |
| chr1 | 125214932 | 125215084 |
| chr1 | 125219727 | 125219937 |
| chr1 | 125236318 | 125236882 |
| chr1 | 125236882 | 125237589 |
| chr1 | 125237695 | 125237961 |
| chr1 | 125286367 | 125286691 |
| chr1 | 125325583 | 125325733 |
| chr1 | 125370865 | 125371109 |
| chr1 | 125389644 | 125390192 |
| chr1 | 125390192 | 125390662 |
| chr1 | 125428470 | 125428715 |
| chr1 | 125430088 | 125430305 |
| chr1 | 125434849 | 125435001 |
| chr1 | 125435055 | 125436110 |
| chr1 | 125450248 | 125450532 |
| chr1 | 125450532 | 125450916 |
| chr1 | 125454600 | 125454765 |
| chr1 | 125476365 | 125476552 |
| chr1 | 125478777 | 125479018 |
| chr1 | 125489157 | 125489862 |
| chr1 | 125496948 | 125497107 |
| chr1 | 125497154 | 125497315 |
| chr1 | 125508114 | 125508504 |
| chr1 | 125508569 | 125508867 |
| chr1 | 125519074 | 125519753 |
| chr1 | 125520317 | 125520638 |
| chr1 | 125525185 | 125525353 |
| chr1 | 125525906 | 125526333 |
| chr1 | 125526333 | 125526635 |
| chr1 | 125526635 | 125526972 |
| chr1 | 125533250 | 125533495 |
| chr1 | 125540657 | 125540892 |

|      |           |           |
|------|-----------|-----------|
| chr1 | 125549947 | 125550308 |
| chr1 | 125550359 | 125550897 |
| chr1 | 125551604 | 125552006 |
| chr1 | 125559230 | 125559544 |
| chr1 | 125560184 | 125560663 |
| chr1 | 125560663 | 125561443 |
| chr1 | 125607270 | 125607481 |
| chr1 | 125607481 | 125607768 |
| chr1 | 125610791 | 125611016 |
| chr1 | 125612752 | 125613191 |
| chr1 | 125615875 | 125616076 |
| chr1 | 125640008 | 125640176 |
| chr1 | 125640254 | 125640479 |
| chr1 | 125647769 | 125647980 |
| chr1 | 125647985 | 125648523 |
| chr1 | 125648704 | 125648854 |
| chr1 | 125649078 | 125649330 |
| chr1 | 125654108 | 125654273 |
| chr1 | 125661031 | 125661195 |
| chr1 | 125665196 | 125665377 |
| chr1 | 125665377 | 125665459 |
| chr1 | 125665800 | 125666111 |
| chr1 | 125669100 | 125669363 |
| chr1 | 125670160 | 125670332 |
| chr1 | 125676407 | 125676574 |
| chr1 | 125676578 | 125677191 |
| chr1 | 125677191 | 125677535 |
| chr1 | 125677535 | 125677782 |
| chr1 | 125679337 | 125679821 |
| chr1 | 125687526 | 125687733 |
| chr1 | 125687770 | 125688021 |
| chr1 | 125688021 | 125688683 |
| chr1 | 125693670 | 125693860 |
| chr1 | 125694174 | 125694784 |
| chr1 | 125696803 | 125696968 |
| chr1 | 125700817 | 125701369 |
| chr1 | 125701572 | 125702151 |
| chr1 | 125704803 | 125705032 |
| chr1 | 125705118 | 125705304 |
| chr1 | 125706933 | 125707173 |
| chr1 | 125709931 | 125710273 |
| chr1 | 125721238 | 125722023 |

|      |           |           |
|------|-----------|-----------|
| chr1 | 125730177 | 125730464 |
| chr1 | 125731711 | 125731893 |
| chr1 | 125731893 | 125732040 |
| chr1 | 125740752 | 125741042 |
| chr1 | 125755003 | 125755333 |
| chr1 | 125755333 | 125755657 |
| chr1 | 125755657 | 125755955 |
| chr1 | 125789907 | 125790092 |
| chr1 | 125800132 | 125800898 |
| chr1 | 125804474 | 125804693 |
| chr1 | 125825341 | 125825624 |
| chr1 | 125850156 | 125850381 |
| chr1 | 125910575 | 125910762 |
| chr1 | 125911314 | 125911577 |
| chr1 | 125911577 | 125911877 |
| chr1 | 125911877 | 125912168 |
| chr1 | 125912168 | 125912519 |
| chr1 | 125950760 | 125951527 |
| chr1 | 126032357 | 126032544 |
| chr1 | 126065834 | 126065989 |
| chr1 | 126153622 | 126153772 |
| chr1 | 126269660 | 126269868 |
| chr1 | 126271589 | 126272090 |
| chr1 | 126296705 | 126296921 |
| chr1 | 126408035 | 126408195 |
| chr1 | 126431707 | 126431937 |
| chr1 | 126443427 | 126443857 |
| chr1 | 126592508 | 126593011 |
| chr1 | 126593011 | 126593383 |
| chr1 | 126604591 | 126604854 |
| chr1 | 126608954 | 126609204 |
| chr1 | 126639541 | 126639790 |
| chr1 | 126649844 | 126650114 |
| chr1 | 126650248 | 126650569 |
| chr1 | 126650835 | 126651160 |
| chr1 | 126658693 | 126659109 |
| chr1 | 126670497 | 126670902 |
| chr1 | 126673186 | 126673636 |
| chr1 | 126679380 | 126679762 |
| chr1 | 126679762 | 126680142 |
| chr1 | 126680177 | 126680337 |
| chr1 | 126736698 | 126736884 |

|      |           |           |
|------|-----------|-----------|
| chr1 | 126755749 | 126756072 |
| chr1 | 126811443 | 126811593 |
| chr1 | 126817404 | 126817687 |
| chr1 | 126817687 | 126818061 |
| chr1 | 126818115 | 126818390 |
| chr1 | 126827009 | 126827371 |
| chr1 | 126844835 | 126844985 |
| chr1 | 126931872 | 126932204 |
| chr1 | 126939215 | 126939391 |
| chr1 | 126940197 | 126940537 |
| chr1 | 126940582 | 126940737 |
| chr1 | 126944051 | 126944243 |
| chr1 | 126993381 | 126993531 |
| chr1 | 127053773 | 127053975 |
| chr1 | 127204760 | 127205099 |
| chr1 | 127205099 | 127205624 |
| chr1 | 127205771 | 127205932 |
| chr1 | 127205981 | 127206255 |
| chr1 | 127206255 | 127206616 |
| chr1 | 127212908 | 127213116 |
| chr1 | 127219229 | 127219422 |
| chr1 | 127219707 | 127219964 |
| chr1 | 127233040 | 127233658 |
| chr1 | 127233658 | 127233965 |
| chr1 | 127239756 | 127240363 |
| chr1 | 127240363 | 127240611 |
| chr1 | 127246243 | 127246510 |
| chr1 | 127248232 | 127248488 |
| chr1 | 127248488 | 127248797 |
| chr1 | 127251677 | 127251887 |
| chr1 | 127251952 | 127252192 |
| chr1 | 127256524 | 127256703 |
| chr1 | 127256994 | 127257467 |
| chr1 | 127290451 | 127290640 |
| chr1 | 127290700 | 127290949 |
| chr1 | 127290949 | 127291222 |
| chr1 | 127291222 | 127291792 |
| chr1 | 127301073 | 127301468 |
| chr1 | 127330383 | 127330563 |
| chr1 | 127344550 | 127344958 |
| chr1 | 127344958 | 127345455 |
| chr1 | 127408800 | 127409003 |

|      |           |           |
|------|-----------|-----------|
| chr1 | 127409675 | 127409871 |
| chr1 | 127424889 | 127425554 |
| chr1 | 127458965 | 127459244 |
| chr1 | 127461067 | 127461230 |
| chr1 | 127484358 | 127484545 |
| chr1 | 127484898 | 127485130 |
| chr1 | 127487316 | 127487466 |
| chr1 | 127493929 | 127494382 |
| chr1 | 127494480 | 127494828 |
| chr1 | 127496765 | 127497175 |
| chr1 | 127500290 | 127500535 |
| chr1 | 127569211 | 127569465 |
| chr1 | 127583812 | 127584039 |
| chr1 | 127608161 | 127608435 |
| chr1 | 127608435 | 127608762 |
| chr1 | 127609149 | 127609409 |
| chr1 | 127609565 | 127609828 |
| chr1 | 127609828 | 127610049 |
| chr1 | 127622180 | 127622419 |
| chr1 | 127622419 | 127622976 |
| chr1 | 127626700 | 127626954 |
| chr1 | 127627423 | 127627905 |
| chr1 | 127628512 | 127628665 |
| chr1 | 127646290 | 127646440 |
| chr1 | 127660120 | 127660435 |
| chr1 | 127660472 | 127660784 |
| chr1 | 127677218 | 127677621 |
| chr1 | 127677621 | 127677965 |
| chr1 | 127677965 | 127678257 |
| chr1 | 127679902 | 127680086 |
| chr1 | 127755714 | 127756180 |
| chr1 | 127773769 | 127774083 |
| chr1 | 127774083 | 127774279 |
| chr1 | 127774279 | 127774513 |
| chr1 | 127774513 | 127774872 |
| chr1 | 127781139 | 127781438 |
| chr1 | 127806225 | 127806463 |
| chr1 | 127806463 | 127806684 |
| chr1 | 127818846 | 127819111 |
| chr1 | 127819111 | 127819353 |
| chr1 | 127819546 | 127819699 |
| chr1 | 127826340 | 127826490 |

|      |           |           |
|------|-----------|-----------|
| chr1 | 127827386 | 127827624 |
| chr1 | 127833723 | 127833932 |
| chr1 | 127838372 | 127838603 |
| chr1 | 127838685 | 127838947 |
| chr1 | 127860120 | 127860298 |
| chr1 | 127860588 | 127860854 |
| chr1 | 127868584 | 127868895 |
| chr1 | 127868895 | 127869342 |
| chr1 | 127895917 | 127896158 |
| chr1 | 127958571 | 127958726 |
| chr1 | 127961205 | 127961468 |
| chr1 | 127975629 | 127976306 |
| chr1 | 127982042 | 127982335 |
| chr1 | 127982335 | 127982644 |
| chr1 | 127982766 | 127982955 |
| chr1 | 127983302 | 127983641 |
| chr1 | 127983641 | 127983922 |
| chr1 | 127988614 | 127988873 |
| chr1 | 127991489 | 127991651 |
| chr1 | 127991705 | 127992106 |
| chr1 | 128016242 | 128016409 |
| chr1 | 128032279 | 128032461 |
| chr1 | 128058680 | 128058976 |
| chr1 | 128065546 | 128065756 |
| chr1 | 128102371 | 128102567 |
| chr1 | 128102598 | 128103020 |
| chr1 | 128103020 | 128103436 |
| chr1 | 128103436 | 128103881 |
| chr1 | 128115651 | 128115870 |
| chr1 | 128124477 | 128124702 |
| chr1 | 128221595 | 128221889 |
| chr1 | 128243930 | 128244261 |
| chr1 | 128244261 | 128244633 |
| chr1 | 128244633 | 128244995 |
| chr1 | 128245011 | 128245224 |
| chr1 | 128270793 | 128270944 |
| chr1 | 128357548 | 128357784 |
| chr1 | 128358871 | 128359288 |
| chr1 | 128359288 | 128359575 |
| chr1 | 128359575 | 128359970 |
| chr1 | 128368732 | 128368964 |
| chr1 | 128391777 | 128392235 |

|      |           |           |
|------|-----------|-----------|
| chr1 | 128398738 | 128399658 |
| chr1 | 128416559 | 128417001 |
| chr1 | 128417001 | 128417224 |
| chr1 | 128417224 | 128417743 |
| chr1 | 128435602 | 128436218 |
| chr1 | 128471993 | 128472500 |
| chr1 | 128472500 | 128472942 |
| chr1 | 128591895 | 128592054 |
| chr1 | 128592062 | 128592296 |
| chr1 | 128592296 | 128592507 |
| chr1 | 128592528 | 128592764 |
| chr1 | 128593215 | 128593386 |
| chr1 | 128701405 | 128701605 |
| chr1 | 128824307 | 128824575 |
| chr1 | 128824930 | 128825485 |
| chr1 | 128832672 | 128832914 |
| chr1 | 129179390 | 129179736 |
| chr1 | 129184317 | 129184559 |
| chr1 | 129228050 | 129228247 |
| chr1 | 129244392 | 129244553 |
| chr1 | 129251700 | 129251963 |
| chr1 | 129253421 | 129253709 |
| chr1 | 129254590 | 129254742 |
| chr1 | 129363420 | 129363748 |
| chr1 | 129363995 | 129364347 |
| chr1 | 129386336 | 129386919 |
| chr1 | 129463015 | 129463166 |
| chr1 | 129497910 | 129498104 |
| chr1 | 130214647 | 130214837 |
| chr1 | 130224559 | 130224868 |
| chr1 | 130225079 | 130225288 |
| chr1 | 130272338 | 130272556 |
| chr1 | 130350369 | 130350524 |
| chr1 | 130372237 | 130372387 |
| chr1 | 130438360 | 130438521 |
| chr1 | 130457313 | 130457534 |
| chr1 | 130462193 | 130462438 |
| chr1 | 130462438 | 130462661 |
| chr1 | 130462661 | 130463174 |
| chr1 | 130474237 | 130474727 |
| chr1 | 130485510 | 130485725 |
| chr1 | 130485911 | 130486337 |



|      |           |           |
|------|-----------|-----------|
| chr1 | 130486337 | 130486581 |
| chr1 | 130548055 | 130548284 |
| chr1 | 130634017 | 130634313 |
| chr1 | 130648353 | 130648679 |
| chr1 | 130692008 | 130692189 |
| chr1 | 130692599 | 130692785 |
| chr1 | 130715503 | 130715776 |
| chr1 | 130715776 | 130716255 |
| chr1 | 130716780 | 130717240 |
| chr1 | 130717240 | 130717673 |
| chr1 | 130717692 | 130717851 |
| chr1 | 130731749 | 130732189 |
| chr1 | 130733556 | 130734090 |
| chr1 | 130734425 | 130734777 |
| chr1 | 130737611 | 130737936 |
| chr1 | 130740380 | 130740539 |
| chr1 | 130740864 | 130741239 |
| chr1 | 130741321 | 130741588 |
| chr1 | 130745686 | 130745858 |
| chr1 | 130747123 | 130747649 |
| chr1 | 130761079 | 130761504 |
| chr1 | 130761504 | 130761958 |
| chr1 | 130764045 | 130764268 |
| chr1 | 130764268 | 130764488 |
| chr1 | 130766866 | 130767136 |
| chr1 | 130770350 | 130770914 |
| chr1 | 130770937 | 130771430 |
| chr1 | 130776741 | 130776979 |
| chr1 | 130784180 | 130784429 |
| chr1 | 130786378 | 130786586 |
| chr1 | 130787081 | 130787265 |
| chr1 | 130789568 | 130790007 |
| chr1 | 130790007 | 130790654 |
| chr1 | 130797040 | 130797257 |
| chr1 | 130804013 | 130804227 |
| chr1 | 130838386 | 130838608 |
| chr1 | 130853307 | 130853487 |
| chr1 | 130860406 | 130860780 |
| chr1 | 130875218 | 130875436 |
| chr1 | 130879918 | 130880691 |
| chr1 | 130886388 | 130886794 |
| chr1 | 130886794 | 130887036 |

|      |           |           |
|------|-----------|-----------|
| chr1 | 130887226 | 130887634 |
| chr1 | 130892290 | 130892901 |
| chr1 | 130902459 | 130902919 |
| chr1 | 130918347 | 130918644 |
| chr1 | 130918644 | 130918957 |
| chr1 | 130944044 | 130944336 |
| chr1 | 130979610 | 130979782 |
| chr1 | 130984578 | 130984772 |
| chr1 | 130987611 | 130987803 |
| chr1 | 130996165 | 130996480 |
| chr1 | 131000464 | 131000668 |
| chr1 | 131010324 | 131010550 |
| chr1 | 131010590 | 131010774 |
| chr1 | 131021517 | 131021878 |
| chr1 | 131025966 | 131026116 |
| chr1 | 131038041 | 131038660 |
| chr1 | 131039533 | 131039805 |
| chr1 | 131042732 | 131043034 |
| chr1 | 131046073 | 131046240 |
| chr1 | 131050748 | 131050898 |
| chr1 | 131051118 | 131051305 |
| chr1 | 131053145 | 131053611 |
| chr1 | 131054422 | 131054572 |
| chr1 | 131055545 | 131055750 |
| chr1 | 131060375 | 131060603 |
| chr1 | 131060963 | 131061124 |
| chr1 | 131061124 | 131061283 |
| chr1 | 131063591 | 131063778 |
| chr1 | 131064208 | 131064563 |
| chr1 | 131072335 | 131072667 |
| chr1 | 131072667 | 131072909 |
| chr1 | 131080024 | 131080228 |
| chr1 | 131082655 | 131082973 |
| chr1 | 131083006 | 131083239 |
| chr1 | 131083749 | 131084013 |
| chr1 | 131085371 | 131085553 |
| chr1 | 131088715 | 131088901 |
| chr1 | 131089003 | 131089217 |
| chr1 | 131089750 | 131090168 |
| chr1 | 131090168 | 131090549 |
| chr1 | 131096759 | 131097394 |
| chr1 | 131097394 | 131098067 |

|      |           |           |
|------|-----------|-----------|
| chr1 | 131107687 | 131107994 |
| chr1 | 131107994 | 131108279 |
| chr1 | 131108279 | 131108551 |
| chr1 | 131108673 | 131108965 |
| chr1 | 131112532 | 131112920 |
| chr1 | 131115776 | 131115944 |
| chr1 | 131116037 | 131116243 |
| chr1 | 131118489 | 131118976 |
| chr1 | 131118976 | 131119474 |
| chr1 | 131123910 | 131124226 |
| chr1 | 131125908 | 131126377 |
| chr1 | 131126377 | 131126757 |
| chr1 | 131135184 | 131135521 |
| chr1 | 131137692 | 131138154 |
| chr1 | 131138154 | 131138663 |
| chr1 | 131138686 | 131138942 |
| chr1 | 131152991 | 131153512 |
| chr1 | 131153702 | 131153858 |
| chr1 | 131155624 | 131155798 |
| chr1 | 131159069 | 131159280 |
| chr1 | 131159959 | 131160191 |
| chr1 | 131181714 | 131181949 |
| chr1 | 131184021 | 131184234 |
| chr1 | 131184347 | 131184640 |
| chr1 | 131184640 | 131184984 |
| chr1 | 131193803 | 131194037 |
| chr1 | 131200145 | 131200322 |
| chr1 | 131207608 | 131208027 |
| chr1 | 131221918 | 131222200 |
| chr1 | 131222200 | 131222533 |
| chr1 | 131228184 | 131228482 |
| chr1 | 131238162 | 131238554 |
| chr1 | 131238621 | 131238936 |
| chr1 | 131238936 | 131239302 |
| chr1 | 131239302 | 131240012 |
| chr1 | 131244637 | 131244810 |
| chr1 | 131244839 | 131245316 |
| chr1 | 131245316 | 131245615 |
| chr1 | 131245615 | 131245926 |
| chr1 | 131245926 | 131246224 |
| chr1 | 131246266 | 131246421 |
| chr1 | 131246538 | 131246688 |

|      |           |           |
|------|-----------|-----------|
| chr1 | 131252038 | 131252288 |
| chr1 | 131252667 | 131253044 |
| chr1 | 131260421 | 131260694 |
| chr1 | 131270124 | 131270558 |
| chr1 | 131270594 | 131270751 |
| chr1 | 131270800 | 131270969 |
| chr1 | 131276924 | 131277103 |
| chr1 | 131278250 | 131278516 |
| chr1 | 131279087 | 131279489 |
| chr1 | 131279489 | 131279803 |
| chr1 | 131279897 | 131280138 |
| chr1 | 131280162 | 131280592 |
| chr1 | 131286787 | 131287062 |
| chr1 | 131287062 | 131287343 |
| chr1 | 131287343 | 131287743 |
| chr1 | 131290708 | 131290938 |
| chr1 | 131293908 | 131294340 |
| chr1 | 131300807 | 131301073 |
| chr1 | 131333102 | 131333387 |
| chr1 | 131335654 | 131335823 |
| chr1 | 131378175 | 131378379 |
| chr1 | 131400918 | 131401152 |
| chr1 | 131427558 | 131427815 |
| chr1 | 131444033 | 131444201 |
| chr1 | 131447468 | 131447618 |
| chr1 | 131460854 | 131461257 |
| chr1 | 131461257 | 131461528 |
| chr1 | 131462638 | 131462894 |
| chr1 | 131504330 | 131504665 |
| chr1 | 131504665 | 131504884 |
| chr1 | 131506264 | 131506662 |
| chr1 | 131506662 | 131506992 |
| chr1 | 131509090 | 131509362 |
| chr1 | 131511751 | 131512137 |
| chr1 | 131513182 | 131513437 |
| chr1 | 131521530 | 131521948 |
| chr1 | 131526379 | 131526732 |
| chr1 | 131526821 | 131527251 |
| chr1 | 131527251 | 131527599 |
| chr1 | 131527599 | 131527761 |
| chr1 | 131527761 | 131528137 |
| chr1 | 131528207 | 131528401 |

|      |           |           |
|------|-----------|-----------|
| chr1 | 131533912 | 131534084 |
| chr1 | 131541495 | 131541652 |
| chr1 | 131551994 | 131552243 |
| chr1 | 131555019 | 131555236 |
| chr1 | 131555236 | 131555563 |
| chr1 | 131573752 | 131573943 |
| chr1 | 131586597 | 131586879 |
| chr1 | 131586879 | 131587400 |
| chr1 | 131600460 | 131600614 |
| chr1 | 131613380 | 131613826 |
| chr1 | 131625028 | 131625366 |
| chr1 | 131627119 | 131627291 |
| chr1 | 131657915 | 131658128 |
| chr1 | 131658128 | 131658432 |
| chr1 | 131661300 | 131661450 |
| chr1 | 131661729 | 131661975 |
| chr1 | 131663689 | 131663924 |
| chr1 | 131663941 | 131664245 |
| chr1 | 131664245 | 131664510 |
| chr1 | 131672502 | 131672696 |
| chr1 | 131679100 | 131679265 |
| chr1 | 131680055 | 131680447 |
| chr1 | 131690340 | 131691014 |
| chr1 | 131691384 | 131691794 |
| chr1 | 131703487 | 131703853 |
| chr1 | 131703853 | 131704180 |
| chr1 | 131705791 | 131705973 |
| chr1 | 131708425 | 131708654 |
| chr1 | 131712312 | 131712736 |
| chr1 | 131714265 | 131714614 |
| chr1 | 131717585 | 131717855 |
| chr1 | 131719433 | 131719655 |
| chr1 | 131725115 | 131725720 |
| chr1 | 131725720 | 131726107 |
| chr1 | 131730749 | 131731019 |
| chr1 | 131733461 | 131733882 |
| chr1 | 131733919 | 131734181 |
| chr1 | 131737281 | 131737648 |
| chr1 | 131740533 | 131740910 |
| chr1 | 131742299 | 131742533 |
| chr1 | 131747718 | 131747984 |
| chr1 | 131747984 | 131748274 |

|      |           |           |
|------|-----------|-----------|
| chr1 | 131748451 | 131748601 |
| chr1 | 131748912 | 131749363 |
| chr1 | 131749861 | 131750074 |
| chr1 | 131750227 | 131750449 |
| chr1 | 131751195 | 131751579 |
| chr1 | 131751832 | 131752097 |
| chr1 | 131752141 | 131752405 |
| chr1 | 131754338 | 131754495 |
| chr1 | 131759744 | 131759902 |
| chr1 | 131760074 | 131760547 |
| chr1 | 131761251 | 131761975 |
| chr1 | 131765620 | 131765901 |
| chr1 | 131797250 | 131797442 |
| chr1 | 131799048 | 131799198 |
| chr1 | 131827364 | 131827536 |
| chr1 | 131827536 | 131827798 |
| chr1 | 131827798 | 131828201 |
| chr1 | 131828201 | 131828627 |
| chr1 | 131828627 | 131828955 |
| chr1 | 131841017 | 131841373 |
| chr1 | 131846389 | 131846613 |
| chr1 | 131867048 | 131867322 |
| chr1 | 131867322 | 131867583 |
| chr1 | 131867583 | 131868145 |
| chr1 | 131880039 | 131880234 |
| chr1 | 131893432 | 131893603 |
| chr1 | 131910198 | 131910593 |
| chr1 | 131910593 | 131910943 |
| chr1 | 131910943 | 131911264 |
| chr1 | 131911264 | 131911517 |
| chr1 | 131913499 | 131913667 |
| chr1 | 131917193 | 131917346 |
| chr1 | 131937756 | 131938003 |
| chr1 | 131945706 | 131946028 |
| chr1 | 131946028 | 131946295 |
| chr1 | 131948089 | 131948448 |
| chr1 | 131956339 | 131956518 |
| chr1 | 131962533 | 131962900 |
| chr1 | 131962900 | 131963122 |
| chr1 | 131963122 | 131963339 |
| chr1 | 131963339 | 131963637 |
| chr1 | 131963637 | 131963993 |

|      |           |           |
|------|-----------|-----------|
| chr1 | 131967439 | 131967626 |
| chr1 | 131968712 | 131968909 |
| chr1 | 131969089 | 131969482 |
| chr1 | 131969897 | 131970133 |
| chr1 | 131974070 | 131974326 |
| chr1 | 131976764 | 131977251 |
| chr1 | 131977251 | 131977493 |
| chr1 | 131981705 | 131981963 |
| chr1 | 131982951 | 131983354 |
| chr1 | 131995148 | 131995391 |
| chr1 | 131995615 | 131995765 |
| chr1 | 131999351 | 131999615 |
| chr1 | 132006066 | 132006419 |
| chr1 | 132007283 | 132007808 |
| chr1 | 132007808 | 132008419 |
| chr1 | 132010627 | 132011054 |
| chr1 | 132014936 | 132015092 |
| chr1 | 132033841 | 132033991 |
| chr1 | 132046263 | 132046457 |
| chr1 | 132046457 | 132046861 |
| chr1 | 132062759 | 132063023 |
| chr1 | 132063166 | 132063410 |
| chr1 | 132063711 | 132063962 |
| chr1 | 132067515 | 132068250 |
| chr1 | 132075437 | 132075778 |
| chr1 | 132095405 | 132095634 |
| chr1 | 132095634 | 132096026 |
| chr1 | 132099023 | 132099403 |
| chr1 | 132104439 | 132104732 |
| chr1 | 132105751 | 132105924 |
| chr1 | 132106810 | 132106960 |
| chr1 | 132113130 | 132113676 |
| chr1 | 132121239 | 132121735 |
| chr1 | 132133181 | 132134046 |
| chr1 | 132138212 | 132138392 |
| chr1 | 132138749 | 132138983 |
| chr1 | 132139318 | 132139619 |
| chr1 | 132139619 | 132139985 |
| chr1 | 132140257 | 132140417 |
| chr1 | 132143138 | 132143327 |
| chr1 | 132144245 | 132144619 |
| chr1 | 132144847 | 132145133 |

|      |           |           |
|------|-----------|-----------|
| chr1 | 132145133 | 132145540 |
| chr1 | 132146130 | 132146410 |
| chr1 | 132150143 | 132150550 |
| chr1 | 132150732 | 132151191 |
| chr1 | 132151248 | 132151473 |
| chr1 | 132151544 | 132151756 |
| chr1 | 132151782 | 132152317 |
| chr1 | 132155835 | 132155992 |
| chr1 | 132157424 | 132157884 |
| chr1 | 132157916 | 132158111 |
| chr1 | 132158779 | 132159078 |
| chr1 | 132160589 | 132160745 |
| chr1 | 132162746 | 132162897 |
| chr1 | 132168197 | 132168464 |
| chr1 | 132190104 | 132190330 |
| chr1 | 132190330 | 132190568 |
| chr1 | 132190634 | 132190974 |
| chr1 | 132190974 | 132191161 |
| chr1 | 132192306 | 132192471 |
| chr1 | 132195160 | 132195381 |
| chr1 | 132195472 | 132195780 |
| chr1 | 132195780 | 132195972 |
| chr1 | 132196298 | 132196517 |
| chr1 | 132196517 | 132196720 |
| chr1 | 132199358 | 132199615 |
| chr1 | 132200623 | 132200982 |
| chr1 | 132200982 | 132201297 |
| chr1 | 132205951 | 132206365 |
| chr1 | 132206365 | 132206755 |
| chr1 | 132206871 | 132207250 |
| chr1 | 132210812 | 132211262 |
| chr1 | 132211788 | 132212008 |
| chr1 | 132233649 | 132233886 |
| chr1 | 132237627 | 132237866 |
| chr1 | 132241599 | 132241751 |
| chr1 | 132254503 | 132254810 |
| chr1 | 132255069 | 132255342 |
| chr1 | 132255342 | 132255597 |
| chr1 | 132255844 | 132256107 |
| chr1 | 132260377 | 132260642 |
| chr1 | 132264594 | 132265014 |
| chr1 | 132265319 | 132265489 |



|      |           |           |
|------|-----------|-----------|
| chr1 | 132266723 | 132267146 |
| chr1 | 132271579 | 132271896 |
| chr1 | 132271952 | 132272344 |
| chr1 | 132280713 | 132280901 |
| chr1 | 132286804 | 132287122 |
| chr1 | 132291382 | 132291590 |
| chr1 | 132291734 | 132292062 |
| chr1 | 132292315 | 132292610 |
| chr1 | 132292610 | 132293174 |
| chr1 | 132294875 | 132295115 |
| chr1 | 132295560 | 132295863 |
| chr1 | 132295922 | 132296072 |
| chr1 | 132296074 | 132296273 |
| chr1 | 132298419 | 132298733 |
| chr1 | 132298733 | 132299023 |
| chr1 | 132299023 | 132299433 |
| chr1 | 132299832 | 132300013 |
| chr1 | 132306090 | 132306273 |
| chr1 | 132306273 | 132306499 |
| chr1 | 132306861 | 132307127 |
| chr1 | 132312725 | 132312981 |
| chr1 | 132315846 | 132316366 |
| chr1 | 132316396 | 132316585 |
| chr1 | 132318374 | 132318702 |
| chr1 | 132318745 | 132319022 |
| chr1 | 132319144 | 132319771 |
| chr1 | 132326948 | 132327135 |
| chr1 | 132333770 | 132333928 |
| chr1 | 132334818 | 132335199 |
| chr1 | 132335199 | 132335624 |
| chr1 | 132335624 | 132335877 |
| chr1 | 132338571 | 132338727 |
| chr1 | 132338893 | 132339252 |
| chr1 | 132346124 | 132346500 |
| chr1 | 132346500 | 132346878 |
| chr1 | 132353405 | 132353789 |
| chr1 | 132353825 | 132354106 |
| chr1 | 132354777 | 132355004 |
| chr1 | 132355082 | 132355377 |
| chr1 | 132355377 | 132355645 |
| chr1 | 132355801 | 132356139 |
| chr1 | 132364377 | 132364663 |

|      |           |           |
|------|-----------|-----------|
| chr1 | 132364663 | 132364878 |
| chr1 | 132365258 | 132365490 |
| chr1 | 132367616 | 132367903 |
| chr1 | 132371701 | 132372060 |
| chr1 | 132384652 | 132385011 |
| chr1 | 132390319 | 132390504 |
| chr1 | 132390699 | 132390943 |
| chr1 | 132390943 | 132391226 |
| chr1 | 132391334 | 132391993 |
| chr1 | 132410806 | 132410958 |
| chr1 | 132417216 | 132417685 |
| chr1 | 132417685 | 132418066 |
| chr1 | 132418066 | 132418270 |
| chr1 | 132431863 | 132432204 |
| chr1 | 132432961 | 132433246 |
| chr1 | 132443213 | 132443528 |
| chr1 | 132476584 | 132477187 |
| chr1 | 132477270 | 132477499 |
| chr1 | 132477499 | 132477733 |
| chr1 | 132513975 | 132514135 |
| chr1 | 132520827 | 132521168 |
| chr1 | 132524076 | 132524323 |
| chr1 | 132525704 | 132526166 |
| chr1 | 132526192 | 132526359 |
| chr1 | 132526359 | 132526544 |
| chr1 | 132527224 | 132527458 |
| chr1 | 132538574 | 132539107 |
| chr1 | 132540072 | 132540492 |
| chr1 | 132541230 | 132541672 |
| chr1 | 132542789 | 132543049 |
| chr1 | 132557802 | 132558113 |
| chr1 | 132558113 | 132558441 |
| chr1 | 132558441 | 132558720 |
| chr1 | 132565775 | 132566072 |
| chr1 | 132568285 | 132568873 |
| chr1 | 132580113 | 132580376 |
| chr1 | 132586622 | 132586915 |
| chr1 | 132586915 | 132587254 |
| chr1 | 132591860 | 132592373 |
| chr1 | 132594728 | 132594946 |
| chr1 | 132602259 | 132602475 |
| chr1 | 132606328 | 132606766 |

|      |           |           |
|------|-----------|-----------|
| chr1 | 132609120 | 132609365 |
| chr1 | 132609433 | 132609602 |
| chr1 | 132636779 | 132637215 |
| chr1 | 132641512 | 132641684 |
| chr1 | 132653388 | 132653593 |
| chr1 | 132655710 | 132656190 |
| chr1 | 132656190 | 132656666 |
| chr1 | 132678451 | 132678607 |
| chr1 | 132681685 | 132681975 |
| chr1 | 132705471 | 132705646 |
| chr1 | 132710463 | 132710683 |
| chr1 | 132727685 | 132728002 |
| chr1 | 132733950 | 132734179 |
| chr1 | 132741503 | 132742002 |
| chr1 | 132745968 | 132746134 |
| chr1 | 132758648 | 132759004 |
| chr1 | 132759020 | 132759303 |
| chr1 | 132759903 | 132760226 |
| chr1 | 132765222 | 132765600 |
| chr1 | 132766221 | 132766459 |
| chr1 | 132771485 | 132771734 |
| chr1 | 132791101 | 132791345 |
| chr1 | 132840862 | 132841014 |
| chr1 | 132841485 | 132841793 |
| chr1 | 132841793 | 132842000 |
| chr1 | 132851390 | 132851545 |
| chr1 | 132864193 | 132864466 |
| chr1 | 132865608 | 132865838 |
| chr1 | 132865838 | 132866034 |
| chr1 | 132880343 | 132880521 |
| chr1 | 132880523 | 132880734 |
| chr1 | 132912715 | 132913174 |
| chr1 | 132913180 | 132913531 |
| chr1 | 132921847 | 132922105 |
| chr1 | 132934968 | 132935209 |
| chr1 | 132937230 | 132937380 |
| chr1 | 132944638 | 132944810 |
| chr1 | 132955798 | 132956004 |
| chr1 | 132956004 | 132956316 |
| chr1 | 132956345 | 132956504 |
| chr1 | 132982786 | 132983060 |
| chr1 | 133007390 | 133007567 |

|      |           |           |
|------|-----------|-----------|
| chr1 | 133024966 | 133025262 |
| chr1 | 133025262 | 133025645 |
| chr1 | 133025645 | 133026013 |
| chr1 | 133026013 | 133026208 |
| chr1 | 133028076 | 133028283 |
| chr1 | 133033102 | 133033320 |
| chr1 | 133033320 | 133033541 |
| chr1 | 133033541 | 133033903 |
| chr1 | 133033903 | 133034466 |
| chr1 | 133039440 | 133039939 |
| chr1 | 133045690 | 133046250 |
| chr1 | 133046250 | 133046485 |
| chr1 | 133046485 | 133046684 |
| chr1 | 133046684 | 133046916 |
| chr1 | 133050166 | 133050513 |
| chr1 | 133057163 | 133057681 |
| chr1 | 133057681 | 133058209 |
| chr1 | 133068439 | 133068637 |
| chr1 | 133083223 | 133083389 |
| chr1 | 133083389 | 133083548 |
| chr1 | 133084140 | 133084555 |
| chr1 | 133087526 | 133087682 |
| chr1 | 133087694 | 133087957 |
| chr1 | 133090564 | 133090989 |
| chr1 | 133091563 | 133091875 |
| chr1 | 133100852 | 133101362 |
| chr1 | 133101362 | 133101721 |
| chr1 | 133102259 | 133102461 |
| chr1 | 133118186 | 133118559 |
| chr1 | 133118673 | 133119176 |
| chr1 | 133130691 | 133131024 |
| chr1 | 133131024 | 133131384 |
| chr1 | 133131384 | 133131825 |
| chr1 | 133133525 | 133133751 |
| chr1 | 133141246 | 133141467 |
| chr1 | 133146017 | 133146406 |
| chr1 | 133146494 | 133146809 |
| chr1 | 133147407 | 133147661 |
| chr1 | 133155270 | 133155420 |
| chr1 | 133161711 | 133161924 |
| chr1 | 133162096 | 133162447 |
| chr1 | 133162478 | 133162688 |

|      |           |           |
|------|-----------|-----------|
| chr1 | 133162919 | 133163495 |
| chr1 | 133163702 | 133164103 |
| chr1 | 133164103 | 133164387 |
| chr1 | 133164545 | 133164830 |
| chr1 | 133177491 | 133177790 |
| chr1 | 133177790 | 133178098 |
| chr1 | 133181005 | 133181462 |
| chr1 | 133187994 | 133188300 |
| chr1 | 133188310 | 133188591 |
| chr1 | 133188591 | 133188869 |
| chr1 | 133188869 | 133189230 |
| chr1 | 133201508 | 133201732 |
| chr1 | 133204283 | 133204911 |
| chr1 | 133205061 | 133205295 |
| chr1 | 133209941 | 133210723 |
| chr1 | 133211895 | 133212208 |
| chr1 | 133214051 | 133214328 |
| chr1 | 133217501 | 133217880 |
| chr1 | 133217939 | 133218190 |
| chr1 | 133225281 | 133225603 |
| chr1 | 133226077 | 133226293 |
| chr1 | 133226565 | 133226853 |
| chr1 | 133226853 | 133227383 |
| chr1 | 133235857 | 133236234 |
| chr1 | 133236621 | 133236808 |
| chr1 | 133236852 | 133237480 |
| chr1 | 133245540 | 133246229 |
| chr1 | 133254312 | 133254523 |
| chr1 | 133265350 | 133265715 |
| chr1 | 133269147 | 133269421 |
| chr1 | 133269859 | 133270352 |
| chr1 | 133270352 | 133270982 |
| chr1 | 133276993 | 133277332 |
| chr1 | 133277332 | 133277610 |
| chr1 | 133291864 | 133292286 |
| chr1 | 133295148 | 133295422 |
| chr1 | 133295422 | 133295630 |
| chr1 | 133296466 | 133296817 |
| chr1 | 133302559 | 133302858 |
| chr1 | 133305969 | 133306202 |
| chr1 | 133306870 | 133307154 |
| chr1 | 133307443 | 133307682 |

|      |           |           |
|------|-----------|-----------|
| chr1 | 133309648 | 133309935 |
| chr1 | 133309935 | 133310191 |
| chr1 | 133311300 | 133311583 |
| chr1 | 133314454 | 133314734 |
| chr1 | 133315809 | 133316109 |
| chr1 | 133316344 | 133316622 |
| chr1 | 133316725 | 133317007 |
| chr1 | 133317282 | 133317432 |
| chr1 | 133327992 | 133328278 |
| chr1 | 133329445 | 133329672 |
| chr1 | 133334512 | 133334706 |
| chr1 | 133342966 | 133343187 |
| chr1 | 133347894 | 133348176 |
| chr1 | 133353179 | 133353559 |
| chr1 | 133353559 | 133353867 |
| chr1 | 133363166 | 133363682 |
| chr1 | 133363682 | 133364174 |
| chr1 | 133364193 | 133364408 |
| chr1 | 133372199 | 133372516 |
| chr1 | 133380819 | 133380983 |
| chr1 | 133382028 | 133382368 |
| chr1 | 133385562 | 133385815 |
| chr1 | 133392779 | 133392932 |
| chr1 | 133400277 | 133400744 |
| chr1 | 133404147 | 133404308 |
| chr1 | 133406538 | 133406815 |
| chr1 | 133406815 | 133407228 |
| chr1 | 133413163 | 133413465 |
| chr1 | 133418111 | 133418726 |
| chr1 | 133422997 | 133423156 |
| chr1 | 133423263 | 133423564 |
| chr1 | 133423564 | 133423981 |
| chr1 | 133423981 | 133424310 |
| chr1 | 133424310 | 133424719 |
| chr1 | 133460779 | 133461021 |
| chr1 | 133465752 | 133466052 |
| chr1 | 133466686 | 133467011 |
| chr1 | 133470753 | 133470993 |
| chr1 | 133471064 | 133471588 |
| chr1 | 133471638 | 133471893 |
| chr1 | 133476890 | 133477243 |
| chr1 | 133477243 | 133477494 |

|      |           |           |
|------|-----------|-----------|
| chr1 | 133477494 | 133477711 |
| chr1 | 133487176 | 133487536 |
| chr1 | 133487536 | 133487888 |
| chr1 | 133488026 | 133488218 |
| chr1 | 133499270 | 133499554 |
| chr1 | 133499554 | 133499843 |
| chr1 | 133507932 | 133508091 |
| chr1 | 133510234 | 133510465 |
| chr1 | 133536400 | 133536571 |
| chr1 | 133560960 | 133561454 |
| chr1 | 133577887 | 133578146 |
| chr1 | 133594440 | 133594998 |
| chr1 | 133594998 | 133595589 |
| chr1 | 133595589 | 133596146 |
| chr1 | 133604638 | 133604907 |
| chr1 | 133609723 | 133609935 |
| chr1 | 133609935 | 133610182 |
| chr1 | 133610182 | 133610591 |
| chr1 | 133641277 | 133641445 |
| chr1 | 133660724 | 133661229 |
| chr1 | 133661229 | 133661620 |
| chr1 | 133685685 | 133686187 |
| chr1 | 133694325 | 133694535 |
| chr1 | 133694649 | 133694812 |
| chr1 | 133695703 | 133696475 |
| chr1 | 133701951 | 133702108 |
| chr1 | 133712783 | 133712960 |
| chr1 | 133716555 | 133716798 |
| chr1 | 133736304 | 133736604 |
| chr1 | 133740647 | 133740851 |
| chr1 | 133745143 | 133745362 |
| chr1 | 133750017 | 133750542 |
| chr1 | 133751697 | 133752182 |
| chr1 | 133765170 | 133765929 |
| chr1 | 133771692 | 133772323 |
| chr1 | 133777678 | 133778079 |
| chr1 | 133778981 | 133779614 |
| chr1 | 133781672 | 133781862 |
| chr1 | 133784562 | 133784990 |
| chr1 | 133790062 | 133790298 |
| chr1 | 133793429 | 133793647 |
| chr1 | 133800655 | 133800830 |

|      |           |           |
|------|-----------|-----------|
| chr1 | 133800867 | 133801355 |
| chr1 | 133801427 | 133801600 |
| chr1 | 133815500 | 133815749 |
| chr1 | 133815749 | 133816214 |
| chr1 | 133816715 | 133816946 |
| chr1 | 133843283 | 133843655 |
| chr1 | 133853192 | 133853434 |
| chr1 | 133855589 | 133855974 |
| chr1 | 133856032 | 133856472 |
| chr1 | 133885869 | 133886071 |
| chr1 | 133894089 | 133894269 |
| chr1 | 133896373 | 133896660 |
| chr1 | 133899083 | 133899250 |
| chr1 | 133905255 | 133905608 |
| chr1 | 133908390 | 133908633 |
| chr1 | 133909002 | 133909267 |
| chr1 | 133909267 | 133909527 |
| chr1 | 133911480 | 133911824 |
| chr1 | 133930622 | 133930772 |
| chr1 | 133941319 | 133941527 |
| chr1 | 133950083 | 133950470 |
| chr1 | 133950470 | 133950831 |
| chr1 | 133953272 | 133953656 |
| chr1 | 133959511 | 133959698 |
| chr1 | 133961468 | 133961776 |
| chr1 | 133961776 | 133962189 |
| chr1 | 133976355 | 133976509 |
| chr1 | 133978362 | 133978771 |
| chr1 | 133978774 | 133979061 |
| chr1 | 133979087 | 133979237 |
| chr1 | 133981285 | 133981637 |
| chr1 | 134022434 | 134022683 |
| chr1 | 134045992 | 134046247 |
| chr1 | 134048803 | 134049086 |
| chr1 | 134053278 | 134053536 |
| chr1 | 134059810 | 134060046 |
| chr1 | 134060799 | 134061191 |
| chr1 | 134061191 | 134061515 |
| chr1 | 134065333 | 134065784 |
| chr1 | 134067079 | 134067546 |
| chr1 | 134070175 | 134070442 |
| chr1 | 134070553 | 134070707 |



|      |           |           |
|------|-----------|-----------|
| chr1 | 134078775 | 134079249 |
| chr1 | 134079249 | 134079596 |
| chr1 | 134091858 | 134092027 |
| chr1 | 134092305 | 134092662 |
| chr1 | 134092836 | 134093506 |
| chr1 | 134094065 | 134094244 |
| chr1 | 134098022 | 134098242 |
| chr1 | 134099062 | 134099725 |
| chr1 | 134099725 | 134100290 |
| chr1 | 134101641 | 134101861 |
| chr1 | 134106589 | 134107083 |
| chr1 | 134110497 | 134110749 |
| chr1 | 134111047 | 134111346 |
| chr1 | 134113630 | 134113828 |
| chr1 | 134119318 | 134119471 |
| chr1 | 134119473 | 134119634 |
| chr1 | 134120255 | 134120486 |
| chr1 | 134122266 | 134122453 |
| chr1 | 134151591 | 134152018 |
| chr1 | 134161540 | 134161900 |
| chr1 | 134162474 | 134163013 |
| chr1 | 134191219 | 134191578 |
| chr1 | 134196481 | 134196781 |
| chr1 | 134202125 | 134202280 |
| chr1 | 134206121 | 134206321 |
| chr1 | 134217019 | 134217412 |
| chr1 | 134221201 | 134221459 |
| chr1 | 134222163 | 134222467 |
| chr1 | 134222572 | 134222722 |
| chr1 | 134234788 | 134235083 |
| chr1 | 134235132 | 134235351 |
| chr1 | 134244237 | 134244588 |
| chr1 | 134288312 | 134288594 |
| chr1 | 134299092 | 134299334 |
| chr1 | 134322695 | 134322905 |
| chr1 | 134331952 | 134332215 |
| chr1 | 134332751 | 134333059 |
| chr1 | 134333059 | 134333329 |
| chr1 | 134336483 | 134336768 |
| chr1 | 134344448 | 134344944 |
| chr1 | 134346537 | 134346705 |
| chr1 | 134346755 | 134346947 |

|      |           |           |
|------|-----------|-----------|
| chr1 | 134348998 | 134349302 |
| chr1 | 134361295 | 134361445 |
| chr1 | 134361502 | 134361851 |
| chr1 | 134361851 | 134362218 |
| chr1 | 134368646 | 134368796 |
| chr1 | 134368863 | 134369096 |
| chr1 | 134391175 | 134391377 |
| chr1 | 134393582 | 134393750 |
| chr1 | 134393868 | 134394092 |
| chr1 | 134399764 | 134400358 |
| chr1 | 134405239 | 134405469 |
| chr1 | 134405607 | 134406127 |
| chr1 | 134406127 | 134406449 |
| chr1 | 134406449 | 134406743 |
| chr1 | 134414863 | 134415125 |
| chr1 | 134415148 | 134415633 |
| chr1 | 134415633 | 134416003 |
| chr1 | 134420433 | 134420800 |
| chr1 | 134433581 | 134433741 |
| chr1 | 134435521 | 134435677 |
| chr1 | 134442060 | 134442334 |
| chr1 | 134447246 | 134447404 |
| chr1 | 134451086 | 134451287 |
| chr1 | 134454961 | 134455270 |
| chr1 | 134455270 | 134455616 |
| chr1 | 134455616 | 134455900 |
| chr1 | 134493592 | 134493766 |
| chr1 | 134494397 | 134494767 |
| chr1 | 134494767 | 134495031 |
| chr1 | 134495031 | 134495315 |
| chr1 | 134513306 | 134513469 |
| chr1 | 134518669 | 134518939 |
| chr1 | 134555209 | 134555524 |
| chr1 | 134556536 | 134556883 |
| chr1 | 134556883 | 134557254 |
| chr1 | 134560081 | 134560416 |
| chr1 | 134560416 | 134560750 |
| chr1 | 134560750 | 134561039 |
| chr1 | 134561039 | 134561259 |
| chr1 | 134561259 | 134561486 |
| chr1 | 134580949 | 134581225 |
| chr1 | 134583375 | 134584005 |

|      |           |           |
|------|-----------|-----------|
| chr1 | 134636782 | 134636932 |
| chr1 | 134638664 | 134638849 |
| chr1 | 134646293 | 134646856 |
| chr1 | 134646922 | 134647072 |
| chr1 | 134650382 | 134650594 |
| chr1 | 134651731 | 134651949 |
| chr1 | 134664964 | 134665124 |
| chr1 | 134674387 | 134674666 |
| chr1 | 134676805 | 134676955 |
| chr1 | 134679502 | 134679710 |
| chr1 | 134686936 | 134687124 |
| chr1 | 134699039 | 134699427 |
| chr1 | 134701235 | 134701589 |
| chr1 | 134701619 | 134701769 |
| chr1 | 134704978 | 134705211 |
| chr1 | 134708893 | 134709181 |
| chr1 | 134709181 | 134709556 |
| chr1 | 134725345 | 134725624 |
| chr1 | 134729205 | 134729432 |
| chr1 | 134737557 | 134737848 |
| chr1 | 134741538 | 134741784 |
| chr1 | 134742053 | 134742234 |
| chr1 | 134745780 | 134746023 |
| chr1 | 134746269 | 134746496 |
| chr1 | 134749584 | 134750310 |
| chr1 | 134752455 | 134752614 |
| chr1 | 134753737 | 134754270 |
| chr1 | 134754270 | 134754657 |
| chr1 | 134771116 | 134771952 |
| chr1 | 134772082 | 134772311 |
| chr1 | 134783910 | 134784366 |
| chr1 | 134784494 | 134784785 |
| chr1 | 134799172 | 134799353 |
| chr1 | 134799353 | 134799479 |
| chr1 | 134803345 | 134803664 |
| chr1 | 134803664 | 134804139 |
| chr1 | 134804139 | 134804533 |
| chr1 | 134804533 | 134804764 |
| chr1 | 134809129 | 134809406 |
| chr1 | 134809406 | 134809799 |
| chr1 | 134810739 | 134811135 |
| chr1 | 134816660 | 134816984 |

|      |           |           |
|------|-----------|-----------|
| chr1 | 134818510 | 134819103 |
| chr1 | 134819103 | 134819645 |
| chr1 | 134819686 | 134819874 |
| chr1 | 134829631 | 134829880 |
| chr1 | 134831948 | 134832109 |
| chr1 | 134837035 | 134837326 |
| chr1 | 134854412 | 134854637 |
| chr1 | 134880427 | 134880767 |
| chr1 | 134896140 | 134896315 |
| chr1 | 134902310 | 134902524 |
| chr1 | 134909474 | 134909830 |
| chr1 | 134929229 | 134929384 |
| chr1 | 134939571 | 134939728 |
| chr1 | 134942748 | 134942944 |
| chr1 | 134947178 | 134947331 |
| chr1 | 134949308 | 134949568 |
| chr1 | 134950016 | 134950307 |
| chr1 | 134955073 | 134955499 |
| chr1 | 134955499 | 134955846 |
| chr1 | 134955846 | 134956192 |
| chr1 | 134961673 | 134961856 |
| chr1 | 134962112 | 134962374 |
| chr1 | 134962374 | 134962861 |
| chr1 | 134962883 | 134963154 |
| chr1 | 134968690 | 134968895 |
| chr1 | 134971716 | 134971995 |
| chr1 | 134985174 | 134985754 |
| chr1 | 134986051 | 134986306 |
| chr1 | 134990891 | 134991055 |
| chr1 | 134994459 | 134994728 |
| chr1 | 134995989 | 134996272 |
| chr1 | 134996560 | 134996747 |
| chr1 | 135001455 | 135001605 |
| chr1 | 135004626 | 135004832 |
| chr1 | 135016801 | 135017322 |
| chr1 | 135019018 | 135019228 |
| chr1 | 135020356 | 135020591 |
| chr1 | 135020591 | 135020828 |
| chr1 | 135020995 | 135021469 |
| chr1 | 135021469 | 135021790 |
| chr1 | 135021797 | 135022023 |
| chr1 | 135022023 | 135022436 |

|      |           |           |
|------|-----------|-----------|
| chr1 | 135030071 | 135030444 |
| chr1 | 135054286 | 135054490 |
| chr1 | 135063034 | 135063268 |
| chr1 | 135063466 | 135063793 |
| chr1 | 135083383 | 135083819 |
| chr1 | 135084926 | 135085083 |
| chr1 | 135090976 | 135091319 |
| chr1 | 135094373 | 135094659 |
| chr1 | 135095290 | 135095455 |
| chr1 | 135096687 | 135096916 |
| chr1 | 135104886 | 135105597 |
| chr1 | 135105804 | 135106014 |
| chr1 | 135106014 | 135106304 |
| chr1 | 135108698 | 135108936 |
| chr1 | 135110236 | 135110401 |
| chr1 | 135112114 | 135112374 |
| chr1 | 135112553 | 135112765 |
| chr1 | 135112765 | 135113033 |
| chr1 | 135132467 | 135132759 |
| chr1 | 135136567 | 135136849 |
| chr1 | 135146509 | 135147013 |
| chr1 | 135147013 | 135147386 |
| chr1 | 135147386 | 135147930 |
| chr1 | 135153924 | 135154190 |
| chr1 | 135154190 | 135154467 |
| chr1 | 135154467 | 135154743 |
| chr1 | 135154743 | 135155013 |
| chr1 | 135169657 | 135169832 |
| chr1 | 135169881 | 135170257 |
| chr1 | 135170257 | 135170620 |
| chr1 | 135170620 | 135170951 |
| chr1 | 135171871 | 135172280 |
| chr1 | 135177778 | 135178178 |
| chr1 | 135180899 | 135181305 |
| chr1 | 135182321 | 135182515 |
| chr1 | 135183061 | 135183330 |
| chr1 | 135183333 | 135183806 |
| chr1 | 135184001 | 135184569 |
| chr1 | 135188284 | 135188516 |
| chr1 | 135198975 | 135199354 |
| chr1 | 135199354 | 135199814 |
| chr1 | 135199991 | 135200173 |

|      |           |           |
|------|-----------|-----------|
| chr1 | 135207001 | 135207153 |
| chr1 | 135208799 | 135209024 |
| chr1 | 135226254 | 135226404 |
| chr1 | 135226474 | 135226978 |
| chr1 | 135226986 | 135227216 |
| chr1 | 135227332 | 135227626 |
| chr1 | 135227626 | 135227928 |
| chr1 | 135231990 | 135232155 |
| chr1 | 135248429 | 135248866 |
| chr1 | 135250668 | 135251046 |
| chr1 | 135251562 | 135251712 |
| chr1 | 135256355 | 135256615 |
| chr1 | 135258188 | 135258872 |
| chr1 | 135258875 | 135259042 |
| chr1 | 135259098 | 135259340 |
| chr1 | 135260974 | 135261257 |
| chr1 | 135265887 | 135266218 |
| chr1 | 135268046 | 135268436 |
| chr1 | 135268436 | 135268729 |
| chr1 | 135273387 | 135273707 |
| chr1 | 135281146 | 135281340 |
| chr1 | 135283189 | 135283468 |
| chr1 | 135283468 | 135283836 |
| chr1 | 135283836 | 135284374 |
| chr1 | 135313244 | 135313663 |
| chr1 | 135313663 | 135314152 |
| chr1 | 135324671 | 135324872 |
| chr1 | 135346917 | 135347234 |
| chr1 | 135347924 | 135348109 |
| chr1 | 135366958 | 135367533 |
| chr1 | 135368250 | 135368524 |
| chr1 | 135369156 | 135369373 |
| chr1 | 135374067 | 135374410 |
| chr1 | 135374410 | 135374664 |
| chr1 | 135374748 | 135375674 |
| chr1 | 135381634 | 135382003 |
| chr1 | 135401524 | 135401719 |
| chr1 | 135401807 | 135402061 |
| chr1 | 135410798 | 135411030 |
| chr1 | 135411030 | 135411308 |
| chr1 | 135411308 | 135411546 |
| chr1 | 135411599 | 135411749 |

|      |           |           |
|------|-----------|-----------|
| chr1 | 135413888 | 135414298 |
| chr1 | 135428444 | 135428634 |
| chr1 | 135429809 | 135430152 |
| chr1 | 135430152 | 135430373 |
| chr1 | 135430373 | 135430647 |
| chr1 | 135430647 | 135430928 |
| chr1 | 135448343 | 135448497 |
| chr1 | 135452339 | 135452599 |
| chr1 | 135461204 | 135461620 |
| chr1 | 135466893 | 135467428 |
| chr1 | 135471828 | 135472102 |
| chr1 | 135492461 | 135492780 |
| chr1 | 135509249 | 135509474 |
| chr1 | 135509474 | 135509716 |
| chr1 | 135509720 | 135509980 |
| chr1 | 135510085 | 135510235 |
| chr1 | 135510295 | 135510582 |
| chr1 | 135510582 | 135510844 |
| chr1 | 135515370 | 135515607 |
| chr1 | 135515607 | 135515845 |
| chr1 | 135523150 | 135523422 |
| chr1 | 135535260 | 135535656 |
| chr1 | 135535656 | 135535816 |
| chr1 | 135536397 | 135536637 |
| chr1 | 135540314 | 135540607 |
| chr1 | 135540607 | 135540803 |
| chr1 | 135541253 | 135541582 |
| chr1 | 135544827 | 135545101 |
| chr1 | 135554672 | 135554918 |
| chr1 | 135554918 | 135555218 |
| chr1 | 135555218 | 135555540 |
| chr1 | 135560620 | 135560886 |
| chr1 | 135562152 | 135562411 |
| chr1 | 135585069 | 135585396 |
| chr1 | 135586653 | 135586813 |
| chr1 | 135590881 | 135591073 |
| chr1 | 135594045 | 135594338 |
| chr1 | 135609633 | 135610072 |
| chr1 | 135615999 | 135616258 |
| chr1 | 135626273 | 135626455 |
| chr1 | 135634564 | 135634755 |
| chr1 | 135634901 | 135635108 |

|      |           |           |
|------|-----------|-----------|
| chr1 | 135637516 | 135637847 |
| chr1 | 135659448 | 135659819 |
| chr1 | 135659819 | 135660065 |
| chr1 | 135668235 | 135668690 |
| chr1 | 135670382 | 135670736 |
| chr1 | 135675563 | 135675863 |
| chr1 | 135675866 | 135676099 |
| chr1 | 135687275 | 135687496 |
| chr1 | 135687724 | 135688091 |
| chr1 | 135688091 | 135688559 |
| chr1 | 135691104 | 135691374 |
| chr1 | 135691510 | 135691748 |
| chr1 | 135697539 | 135697767 |
| chr1 | 135699052 | 135699334 |
| chr1 | 135699334 | 135699703 |
| chr1 | 135700667 | 135700949 |
| chr1 | 135708468 | 135708698 |
| chr1 | 135711108 | 135711584 |
| chr1 | 135715000 | 135715282 |
| chr1 | 135719519 | 135719869 |
| chr1 | 135720019 | 135720328 |
| chr1 | 135722487 | 135722764 |
| chr1 | 135723131 | 135723315 |
| chr1 | 135724244 | 135724468 |
| chr1 | 135728994 | 135729341 |
| chr1 | 135729341 | 135729683 |
| chr1 | 135729862 | 135730152 |
| chr1 | 135730400 | 135730695 |
| chr1 | 135731475 | 135731739 |
| chr1 | 135731828 | 135732272 |
| chr1 | 135741956 | 135742221 |
| chr1 | 135742221 | 135742506 |
| chr1 | 135752801 | 135753277 |
| chr1 | 135755896 | 135756398 |
| chr1 | 135760296 | 135760599 |
| chr1 | 135764229 | 135764395 |
| chr1 | 135765751 | 135765906 |
| chr1 | 135765914 | 135766276 |
| chr1 | 135766276 | 135766783 |
| chr1 | 135770896 | 135771239 |
| chr1 | 135771239 | 135771522 |
| chr1 | 135779190 | 135779552 |



|      |           |           |
|------|-----------|-----------|
| chr1 | 135781182 | 135781601 |
| chr1 | 135782820 | 135783067 |
| chr1 | 135787877 | 135788149 |
| chr1 | 135788795 | 135789003 |
| chr1 | 135789897 | 135790151 |
| chr1 | 135792339 | 135792585 |
| chr1 | 135792585 | 135792851 |
| chr1 | 135793347 | 135793563 |
| chr1 | 135793813 | 135793989 |
| chr1 | 135794515 | 135794976 |
| chr1 | 135811206 | 135811588 |
| chr1 | 135812202 | 135812497 |
| chr1 | 135812497 | 135812715 |
| chr1 | 135812715 | 135812984 |
| chr1 | 135813117 | 135813338 |
| chr1 | 135818552 | 135819053 |
| chr1 | 135819982 | 135820469 |
| chr1 | 135820641 | 135821346 |
| chr1 | 135821472 | 135821904 |
| chr1 | 135828764 | 135828981 |
| chr1 | 135828981 | 135829267 |
| chr1 | 135834288 | 135834530 |
| chr1 | 135841610 | 135841793 |
| chr1 | 135841860 | 135842060 |
| chr1 | 135843607 | 135843778 |
| chr1 | 135844426 | 135845009 |
| chr1 | 135845220 | 135845468 |
| chr1 | 135846752 | 135846920 |
| chr1 | 135847139 | 135847408 |
| chr1 | 135847454 | 135847616 |
| chr1 | 135850779 | 135851046 |
| chr1 | 135852134 | 135852301 |
| chr1 | 135852310 | 135852730 |
| chr1 | 135856564 | 135856770 |
| chr1 | 135857071 | 135857654 |
| chr1 | 135861859 | 135862281 |
| chr1 | 135862281 | 135862752 |
| chr1 | 135863727 | 135864145 |
| chr1 | 135865623 | 135865853 |
| chr1 | 135882796 | 135883048 |
| chr1 | 135883048 | 135883319 |
| chr1 | 135883319 | 135883614 |

|      |           |           |
|------|-----------|-----------|
| chr1 | 135883614 | 135883895 |
| chr1 | 135883895 | 135884153 |
| chr1 | 135891549 | 135891856 |
| chr1 | 135891856 | 135892302 |
| chr1 | 135893318 | 135893637 |
| chr1 | 135893637 | 135894109 |
| chr1 | 135895456 | 135895699 |
| chr1 | 135895959 | 135896188 |
| chr1 | 135899217 | 135899553 |
| chr1 | 135900458 | 135900770 |
| chr1 | 135900770 | 135900975 |
| chr1 | 135906428 | 135906758 |
| chr1 | 135906758 | 135907126 |
| chr1 | 135907126 | 135907462 |
| chr1 | 135918564 | 135919036 |
| chr1 | 135919036 | 135919534 |
| chr1 | 135925808 | 135926438 |
| chr1 | 135926588 | 135926793 |
| chr1 | 135928175 | 135928355 |
| chr1 | 135929119 | 135929329 |
| chr1 | 135929855 | 135930194 |
| chr1 | 135931769 | 135931958 |
| chr1 | 135933711 | 135934024 |
| chr1 | 135938306 | 135938943 |
| chr1 | 135944788 | 135945124 |
| chr1 | 135945744 | 135946038 |
| chr1 | 135946162 | 135946733 |
| chr1 | 135948458 | 135948647 |
| chr1 | 135958351 | 135958819 |
| chr1 | 135958885 | 135959035 |
| chr1 | 135982608 | 135982789 |
| chr1 | 136007499 | 136007935 |
| chr1 | 136007935 | 136008201 |
| chr1 | 136008201 | 136008462 |
| chr1 | 136010342 | 136010531 |
| chr1 | 136017822 | 136018109 |
| chr1 | 136018109 | 136018335 |
| chr1 | 136018335 | 136018533 |
| chr1 | 136018537 | 136018819 |
| chr1 | 136040522 | 136040821 |
| chr1 | 136040821 | 136041218 |
| chr1 | 136045863 | 136046091 |

|      |           |           |
|------|-----------|-----------|
| chr1 | 136047508 | 136047659 |
| chr1 | 136050438 | 136050894 |
| chr1 | 136050894 | 136051402 |
| chr1 | 136051408 | 136051864 |
| chr1 | 136064068 | 136064396 |
| chr1 | 136069893 | 136070078 |
| chr1 | 136076152 | 136076417 |
| chr1 | 136116050 | 136116464 |
| chr1 | 136119680 | 136120183 |
| chr1 | 136120669 | 136121005 |
| chr1 | 136121005 | 136121328 |
| chr1 | 136126247 | 136126886 |
| chr1 | 136126899 | 136127280 |
| chr1 | 136131137 | 136131609 |
| chr1 | 136135168 | 136135326 |
| chr1 | 136137090 | 136137331 |
| chr1 | 136139989 | 136140293 |
| chr1 | 136140293 | 136140661 |
| chr1 | 136156376 | 136156601 |
| chr1 | 136167762 | 136167970 |
| chr1 | 136169977 | 136170453 |
| chr1 | 136175261 | 136175672 |
| chr1 | 136177198 | 136177366 |
| chr1 | 136194543 | 136194801 |
| chr1 | 136212883 | 136213128 |
| chr1 | 136220031 | 136220492 |
| chr1 | 136228269 | 136228795 |
| chr1 | 136228988 | 136229309 |
| chr1 | 136230171 | 136230596 |
| chr1 | 136231642 | 136231923 |
| chr1 | 136233916 | 136234199 |
| chr1 | 136234199 | 136234438 |
| chr1 | 136234454 | 136234661 |
| chr1 | 136255171 | 136255626 |
| chr1 | 136259808 | 136260145 |
| chr1 | 136260145 | 136260954 |
| chr1 | 136262118 | 136262362 |
| chr1 | 136268343 | 136268503 |
| chr1 | 136273091 | 136273249 |
| chr1 | 136273311 | 136273828 |
| chr1 | 136291457 | 136291683 |
| chr1 | 136306523 | 136306705 |

|      |           |           |
|------|-----------|-----------|
| chr1 | 136325964 | 136326378 |
| chr1 | 136345283 | 136345961 |
| chr1 | 136345961 | 136346346 |
| chr1 | 136346346 | 136346562 |
| chr1 | 136346745 | 136346991 |
| chr1 | 136361116 | 136361268 |
| chr1 | 136361446 | 136361898 |
| chr1 | 136364817 | 136365037 |
| chr1 | 136370534 | 136370692 |
| chr1 | 136399321 | 136399528 |
| chr1 | 136399850 | 136400166 |
| chr1 | 136401323 | 136401554 |
| chr1 | 136401589 | 136401739 |
| chr1 | 136405445 | 136405900 |
| chr1 | 136414900 | 136415412 |
| chr1 | 136415412 | 136415761 |
| chr1 | 136458993 | 136459143 |
| chr1 | 136466049 | 136466458 |
| chr1 | 136466458 | 136466750 |
| chr1 | 136521490 | 136521864 |
| chr1 | 136525008 | 136525247 |
| chr1 | 136550949 | 136551198 |
| chr1 | 136556136 | 136556293 |
| chr1 | 136565084 | 136565313 |
| chr1 | 136624167 | 136624453 |
| chr1 | 136624538 | 136625242 |
| chr1 | 136625287 | 136625461 |
| chr1 | 136625461 | 136625666 |
| chr1 | 136625666 | 136625896 |
| chr1 | 136652185 | 136652393 |
| chr1 | 136652393 | 136652686 |
| chr1 | 136656514 | 136657049 |
| chr1 | 136665236 | 136665719 |
| chr1 | 136672144 | 136672378 |
| chr1 | 136673367 | 136673636 |
| chr1 | 136676284 | 136676848 |
| chr1 | 136683032 | 136683515 |
| chr1 | 136683515 | 136683776 |
| chr1 | 136683776 | 136684094 |
| chr1 | 136685167 | 136685650 |
| chr1 | 136685801 | 136686025 |
| chr1 | 136695004 | 136695168 |

|      |           |           |
|------|-----------|-----------|
| chr1 | 136695220 | 136695401 |
| chr1 | 136695644 | 136695846 |
| chr1 | 136695866 | 136696281 |
| chr1 | 136696281 | 136696732 |
| chr1 | 136698496 | 136698742 |
| chr1 | 136707415 | 136707633 |
| chr1 | 136718006 | 136718158 |
| chr1 | 136739613 | 136739835 |
| chr1 | 136749250 | 136749459 |
| chr1 | 136751584 | 136751777 |
| chr1 | 136767058 | 136767607 |
| chr1 | 136831151 | 136831311 |
| chr1 | 136839334 | 136839521 |
| chr1 | 136859548 | 136859743 |
| chr1 | 136899814 | 136900223 |
| chr1 | 136915489 | 136915702 |
| chr1 | 136948585 | 136948906 |
| chr1 | 136948906 | 136949270 |
| chr1 | 137020643 | 137020811 |
| chr1 | 137061951 | 137062261 |
| chr1 | 137079105 | 137079700 |
| chr1 | 137079700 | 137079953 |
| chr1 | 137083481 | 137083784 |
| chr1 | 137091853 | 137092147 |
| chr1 | 137127310 | 137127623 |
| chr1 | 137127750 | 137127999 |
| chr1 | 137148088 | 137148276 |
| chr1 | 137197528 | 137197757 |
| chr1 | 137209519 | 137209725 |
| chr1 | 137216229 | 137216483 |
| chr1 | 137225563 | 137225814 |
| chr1 | 137323864 | 137324234 |
| chr1 | 137329085 | 137329237 |
| chr1 | 137467037 | 137467200 |
| chr1 | 137561679 | 137561846 |
| chr1 | 137561846 | 137562008 |
| chr1 | 137588189 | 137588584 |
| chr1 | 137588584 | 137588814 |
| chr1 | 137591286 | 137591640 |
| chr1 | 137745838 | 137746001 |
| chr1 | 137751405 | 137751578 |
| chr1 | 137863523 | 137864003 |

|      |           |           |
|------|-----------|-----------|
| chr1 | 137898285 | 137898799 |
| chr1 | 137898943 | 137899093 |
| chr1 | 137900153 | 137900620 |
| chr1 | 137900694 | 137901198 |
| chr1 | 137929801 | 137930110 |
| chr1 | 137935109 | 137935302 |
| chr1 | 137935760 | 137936223 |
| chr1 | 138009556 | 138009774 |
| chr1 | 138039169 | 138039478 |
| chr1 | 138044615 | 138044855 |
| chr1 | 138085910 | 138086068 |
| chr1 | 138179722 | 138179938 |
| chr1 | 138179958 | 138180395 |
| chr1 | 138180395 | 138180728 |
| chr1 | 138190858 | 138191200 |
| chr1 | 138207419 | 138207569 |
| chr1 | 138248750 | 138249110 |
| chr1 | 138258809 | 138259086 |
| chr1 | 138259274 | 138259513 |
| chr1 | 138265990 | 138266423 |
| chr1 | 138275969 | 138276181 |
| chr1 | 138288740 | 138289207 |
| chr1 | 138290085 | 138290550 |
| chr1 | 138304261 | 138304421 |
| chr1 | 138328403 | 138328565 |
| chr1 | 138328580 | 138328759 |
| chr1 | 138328830 | 138329013 |
| chr1 | 138329091 | 138329635 |
| chr1 | 138329635 | 138329889 |
| chr1 | 138331678 | 138332020 |
| chr1 | 138334792 | 138335269 |
| chr1 | 138343308 | 138343829 |
| chr1 | 138348257 | 138348637 |
| chr1 | 138348637 | 138349075 |
| chr1 | 138355756 | 138355975 |
| chr1 | 138356451 | 138356770 |
| chr1 | 138357914 | 138358189 |
| chr1 | 138370191 | 138370341 |
| chr1 | 138423592 | 138423934 |
| chr1 | 138446897 | 138447195 |
| chr1 | 138487623 | 138487925 |
| chr1 | 138488248 | 138488546 |

|      |           |           |
|------|-----------|-----------|
| chr1 | 138494946 | 138495310 |
| chr1 | 138495346 | 138495499 |
| chr1 | 138506754 | 138506904 |
| chr1 | 138506953 | 138507542 |
| chr1 | 138507545 | 138508041 |
| chr1 | 138508089 | 138508359 |
| chr1 | 138515045 | 138515781 |
| chr1 | 138516996 | 138517266 |
| chr1 | 138535834 | 138536104 |
| chr1 | 138536104 | 138536474 |
| chr1 | 138537317 | 138537550 |
| chr1 | 138537550 | 138537776 |
| chr1 | 138537786 | 138538045 |
| chr1 | 138538283 | 138538533 |
| chr1 | 138558454 | 138558610 |
| chr1 | 138571031 | 138571642 |
| chr1 | 138571642 | 138572154 |
| chr1 | 138596234 | 138596668 |
| chr1 | 138603787 | 138604039 |
| chr1 | 138604039 | 138604302 |
| chr1 | 138604302 | 138604591 |
| chr1 | 138604797 | 138605052 |
| chr1 | 138606796 | 138607219 |
| chr1 | 138617975 | 138618311 |
| chr1 | 138618969 | 138619525 |
| chr1 | 138619525 | 138619913 |
| chr1 | 138620134 | 138620334 |
| chr1 | 138641108 | 138641367 |
| chr1 | 138643419 | 138643774 |
| chr1 | 138668953 | 138669205 |
| chr1 | 138669353 | 138669613 |
| chr1 | 138676406 | 138676630 |
| chr1 | 138692373 | 138692523 |
| chr1 | 138708879 | 138709167 |
| chr1 | 138750355 | 138750538 |
| chr1 | 138752434 | 138752666 |
| chr1 | 138831387 | 138831600 |
| chr1 | 138833486 | 138833670 |
| chr1 | 138835419 | 138835642 |
| chr1 | 138841423 | 138841687 |
| chr1 | 138841687 | 138841920 |
| chr1 | 138841920 | 138842118 |

|      |           |           |
|------|-----------|-----------|
| chr1 | 138842352 | 138842603 |
| chr1 | 138848118 | 138848506 |
| chr1 | 138848506 | 138849093 |
| chr1 | 138856153 | 138856440 |
| chr1 | 138856440 | 138856720 |
| chr1 | 138856720 | 138857020 |
| chr1 | 138911752 | 138911914 |
| chr1 | 138912071 | 138912679 |
| chr1 | 138928505 | 138928812 |
| chr1 | 138928812 | 138929121 |
| chr1 | 138929121 | 138929434 |
| chr1 | 138929661 | 138929856 |
| chr1 | 138929976 | 138930349 |
| chr1 | 138947100 | 138947373 |
| chr1 | 138953856 | 138954127 |
| chr1 | 138959757 | 138960202 |
| chr1 | 138962654 | 138963050 |
| chr1 | 138963050 | 138963451 |
| chr1 | 138963451 | 138963725 |
| chr1 | 138963725 | 138963876 |
| chr1 | 138963876 | 138964094 |
| chr1 | 138964133 | 138964307 |
| chr1 | 138974778 | 138975641 |
| chr1 | 138983476 | 138983873 |
| chr1 | 138992384 | 138992692 |
| chr1 | 138994988 | 138995179 |
| chr1 | 139018939 | 139019276 |
| chr1 | 139028997 | 139029154 |
| chr1 | 139041391 | 139041547 |
| chr1 | 139088681 | 139088842 |
| chr1 | 139095960 | 139096383 |
| chr1 | 139104915 | 139105105 |
| chr1 | 139107699 | 139107879 |
| chr1 | 139107888 | 139108314 |
| chr1 | 139108362 | 139108563 |
| chr1 | 139116030 | 139116225 |
| chr1 | 139145635 | 139145931 |
| chr1 | 139146337 | 139146628 |
| chr1 | 139160191 | 139160380 |
| chr1 | 139161692 | 139161924 |
| chr1 | 139162845 | 139163186 |
| chr1 | 139176960 | 139177303 |



|      |           |           |
|------|-----------|-----------|
| chr1 | 139177424 | 139177667 |
| chr1 | 139179665 | 139180167 |
| chr1 | 139209731 | 139210064 |
| chr1 | 139210606 | 139211012 |
| chr1 | 139267981 | 139268134 |
| chr1 | 139276961 | 139277289 |
| chr1 | 139324541 | 139324911 |
| chr1 | 139325190 | 139325411 |
| chr1 | 139340575 | 139340799 |
| chr1 | 139345311 | 139345471 |
| chr1 | 139345471 | 139345664 |
| chr1 | 139369036 | 139369267 |
| chr1 | 139379201 | 139379662 |
| chr1 | 139379664 | 139379918 |
| chr1 | 139421825 | 139422093 |
| chr1 | 139422093 | 139422361 |
| chr1 | 139422361 | 139422885 |
| chr1 | 139422964 | 139423114 |
| chr1 | 139454294 | 139454555 |
| chr1 | 139454555 | 139454828 |
| chr1 | 139454828 | 139455059 |
| chr1 | 139455059 | 139455290 |
| chr1 | 139455290 | 139455531 |
| chr1 | 139473890 | 139474121 |
| chr1 | 139481122 | 139481429 |
| chr1 | 139481540 | 139481702 |
| chr1 | 139725910 | 139726108 |
| chr1 | 141066859 | 141067153 |
| chr1 | 141464609 | 141464896 |
| chr1 | 142218192 | 142218400 |
| chr1 | 142585023 | 142585228 |
| chr1 | 142588569 | 142588775 |
| chr1 | 142588775 | 142589028 |
| chr1 | 142589931 | 142590136 |
| chr1 | 142740367 | 142740632 |
| chr1 | 142740889 | 142741168 |
| chr1 | 142742382 | 142742645 |
| chr1 | 142828370 | 142828616 |
| chr1 | 143391960 | 143392113 |
| chr1 | 143475266 | 143475746 |
| chr1 | 143536421 | 143536714 |
| chr1 | 143536897 | 143537349 |

|      |           |           |
|------|-----------|-----------|
| chr1 | 143548621 | 143548831 |
| chr1 | 143593048 | 143593215 |
| chr1 | 143702090 | 143702286 |
| chr1 | 143702313 | 143702639 |
| chr1 | 143702639 | 143703319 |
| chr1 | 143705894 | 143706170 |
| chr1 | 143725636 | 143726078 |
| chr1 | 143728080 | 143728378 |
| chr1 | 143730984 | 143731269 |
| chr1 | 143739189 | 143739864 |
| chr1 | 143739864 | 143740443 |
| chr1 | 143776676 | 143776936 |
| chr1 | 143776936 | 143777168 |
| chr1 | 143777168 | 143777471 |
| chr1 | 143777471 | 143777763 |
| chr1 | 143777763 | 143777975 |
| chr1 | 143803626 | 143803862 |
| chr1 | 143813998 | 143814234 |
| chr1 | 143818956 | 143819388 |
| chr1 | 143819677 | 143820006 |
| chr1 | 143871540 | 143871733 |
| chr1 | 143871733 | 143871900 |
| chr1 | 143874270 | 143874441 |
| chr1 | 143878284 | 143878621 |
| chr1 | 143878621 | 143878935 |
| chr1 | 143941369 | 143941868 |
| chr1 | 144003900 | 144004435 |
| chr1 | 144004435 | 144004743 |
| chr1 | 144004847 | 144005071 |
| chr1 | 144006646 | 144006903 |
| chr1 | 144018363 | 144018702 |
| chr1 | 144018702 | 144019052 |
| chr1 | 144019930 | 144020419 |
| chr1 | 144075969 | 144076427 |
| chr1 | 144076525 | 144076824 |
| chr1 | 144085642 | 144085854 |
| chr1 | 144085913 | 144086151 |
| chr1 | 144086151 | 144086468 |
| chr1 | 144202908 | 144203147 |
| chr1 | 144239050 | 144239528 |
| chr1 | 144296253 | 144296529 |
| chr1 | 144306329 | 144306656 |

|      |           |           |
|------|-----------|-----------|
| chr1 | 144308353 | 144308586 |
| chr1 | 144316333 | 144316579 |
| chr1 | 144316595 | 144316801 |
| chr1 | 144343316 | 144343639 |
| chr1 | 144355071 | 144355387 |
| chr1 | 144356054 | 144356315 |
| chr1 | 144406699 | 144406981 |
| chr1 | 144493215 | 144493413 |
| chr1 | 144502328 | 144502507 |
| chr1 | 144600844 | 144601148 |
| chr1 | 144604124 | 144604355 |
| chr1 | 144783610 | 144783828 |
| chr1 | 144786964 | 144787204 |
| chr1 | 145344431 | 145344753 |
| chr1 | 145781394 | 145781737 |
| chr1 | 145930327 | 145930564 |
| chr1 | 145940328 | 145940495 |
| chr1 | 145957844 | 145958078 |
| chr1 | 146320891 | 146321146 |
| chr1 | 146353962 | 146354175 |
| chr1 | 146357013 | 146357378 |
| chr1 | 146498794 | 146499165 |
| chr1 | 146724897 | 146725115 |
| chr1 | 147802058 | 147802350 |
| chr1 | 147802838 | 147803099 |
| chr1 | 148723034 | 148723355 |
| chr1 | 148723459 | 148723663 |
| chr1 | 149617747 | 149617934 |
| chr1 | 149705098 | 149705606 |
| chr1 | 149743757 | 149743909 |
| chr1 | 149813537 | 149814001 |
| chr1 | 149814001 | 149814398 |
| chr1 | 149833034 | 149833296 |
| chr1 | 149833764 | 149834125 |
| chr1 | 149846567 | 149847231 |
| chr1 | 149850129 | 149850283 |
| chr1 | 149852345 | 149852514 |
| chr1 | 149855633 | 149855895 |
| chr1 | 149856756 | 149857099 |
| chr1 | 149862724 | 149863447 |
| chr1 | 149876581 | 149877205 |
| chr1 | 149877762 | 149877968 |

|      |           |           |
|------|-----------|-----------|
| chr1 | 149878283 | 149878475 |
| chr1 | 149889065 | 149889306 |
| chr1 | 149897120 | 149897866 |
| chr1 | 149906877 | 149907077 |
| chr1 | 149929241 | 149929552 |
| chr1 | 149940381 | 149940663 |
| chr1 | 149940698 | 149940861 |
| chr1 | 149946490 | 149946653 |
| chr1 | 149946985 | 149947360 |
| chr1 | 149949323 | 149949784 |
| chr1 | 149950308 | 149950631 |
| chr1 | 149960311 | 149960466 |
| chr1 | 149960630 | 149961096 |
| chr1 | 149961096 | 149961409 |
| chr1 | 149961409 | 149961656 |
| chr1 | 149979761 | 149980132 |
| chr1 | 150026184 | 150026483 |
| chr1 | 150026483 | 150026732 |
| chr1 | 150026878 | 150027061 |
| chr1 | 150027120 | 150027724 |
| chr1 | 150042871 | 150043605 |
| chr1 | 150047384 | 150047698 |
| chr1 | 150049077 | 150049396 |
| chr1 | 150049874 | 150050029 |
| chr1 | 150050272 | 150050551 |
| chr1 | 150050606 | 150050882 |
| chr1 | 150053938 | 150054255 |
| chr1 | 150054751 | 150055039 |
| chr1 | 150058962 | 150059271 |
| chr1 | 150061357 | 150061730 |
| chr1 | 150062777 | 150063144 |
| chr1 | 150063421 | 150063578 |
| chr1 | 150064851 | 150065193 |
| chr1 | 150065765 | 150065950 |
| chr1 | 150096706 | 150096943 |
| chr1 | 150097761 | 150098007 |
| chr1 | 150098612 | 150098790 |
| chr1 | 150099566 | 150100036 |
| chr1 | 150100036 | 150100412 |
| chr1 | 150106752 | 150107008 |
| chr1 | 150108242 | 150108481 |
| chr1 | 150108481 | 150108704 |

|      |           |           |
|------|-----------|-----------|
| chr1 | 150108704 | 150109081 |
| chr1 | 150109081 | 150109545 |
| chr1 | 150109545 | 150109873 |
| chr1 | 150114997 | 150115981 |
| chr1 | 150130091 | 150130372 |
| chr1 | 150130700 | 150130971 |
| chr1 | 150130971 | 150131234 |
| chr1 | 150131621 | 150132221 |
| chr1 | 150132262 | 150132541 |
| chr1 | 150135510 | 150135660 |
| chr1 | 150144151 | 150144335 |
| chr1 | 150144898 | 150145511 |
| chr1 | 150151309 | 150151814 |
| chr1 | 150152504 | 150152889 |
| chr1 | 150156674 | 150156898 |
| chr1 | 150164809 | 150165317 |
| chr1 | 150165337 | 150165549 |
| chr1 | 150170031 | 150170253 |
| chr1 | 150177148 | 150177482 |
| chr1 | 150177482 | 150177727 |
| chr1 | 150197560 | 150198115 |
| chr1 | 150198476 | 150198627 |
| chr1 | 150206444 | 150206687 |
| chr1 | 150208828 | 150209245 |
| chr1 | 150218350 | 150218886 |
| chr1 | 150218886 | 150219373 |
| chr1 | 150247812 | 150248140 |
| chr1 | 150251508 | 150251768 |
| chr1 | 150251768 | 150252197 |
| chr1 | 150256669 | 150256905 |
| chr1 | 150257678 | 150257912 |
| chr1 | 150260131 | 150260358 |
| chr1 | 150260358 | 150260698 |
| chr1 | 150260769 | 150261140 |
| chr1 | 150266602 | 150266848 |
| chr1 | 150267057 | 150267213 |
| chr1 | 150307705 | 150307913 |
| chr1 | 150323251 | 150323635 |
| chr1 | 150360959 | 150361169 |
| chr1 | 150392626 | 150392984 |
| chr1 | 150392984 | 150393230 |
| chr1 | 150393230 | 150393497 |

|      |           |           |
|------|-----------|-----------|
| chr1 | 150393497 | 150393847 |
| chr1 | 150425754 | 150426055 |
| chr1 | 150426229 | 150426555 |
| chr1 | 150460533 | 150461124 |
| chr1 | 150472480 | 150472881 |
| chr1 | 150486970 | 150487173 |
| chr1 | 150497779 | 150497969 |
| chr1 | 150540341 | 150540587 |
| chr1 | 150565726 | 150565952 |
| chr1 | 150566123 | 150566279 |
| chr1 | 150567322 | 150567512 |
| chr1 | 150577133 | 150577348 |
| chr1 | 150761026 | 150761331 |
| chr1 | 150826111 | 150826330 |
| chr1 | 150827241 | 150827490 |
| chr1 | 151009503 | 151009712 |
| chr1 | 151011152 | 151011348 |
| chr1 | 151078981 | 151079234 |
| chr1 | 151084118 | 151084294 |
| chr1 | 151164839 | 151165031 |
| chr1 | 151168501 | 151169049 |
| chr1 | 151172052 | 151172384 |
| chr1 | 151177746 | 151177920 |
| chr1 | 151177953 | 151178109 |
| chr1 | 151181111 | 151181342 |
| chr1 | 151188086 | 151188295 |
| chr1 | 151192968 | 151193201 |
| chr1 | 151204586 | 151204952 |
| chr1 | 151210837 | 151211005 |
| chr1 | 151223442 | 151223812 |
| chr1 | 151226762 | 151226970 |
| chr1 | 151226970 | 151227152 |
| chr1 | 151227485 | 151227884 |
| chr1 | 151228664 | 151228899 |
| chr1 | 151236113 | 151236381 |
| chr1 | 151236793 | 151236953 |
| chr1 | 151239272 | 151239592 |
| chr1 | 151264897 | 151265101 |
| chr1 | 151289206 | 151290157 |
| chr1 | 151303333 | 151303528 |
| chr1 | 151305161 | 151305364 |
| chr1 | 151343926 | 151344607 |

|      |           |           |
|------|-----------|-----------|
| chr1 | 151344607 | 151344907 |
| chr1 | 151344907 | 151345184 |
| chr1 | 151345184 | 151345474 |
| chr1 | 151350753 | 151350943 |
| chr1 | 151352989 | 151353331 |
| chr1 | 151362779 | 151363056 |
| chr1 | 151371590 | 151371811 |
| chr1 | 151390136 | 151390286 |
| chr1 | 151428040 | 151428345 |
| chr1 | 151428345 | 151428686 |
| chr1 | 151428686 | 151428950 |
| chr1 | 151428950 | 151429172 |
| chr1 | 151462815 | 151463251 |
| chr1 | 151466518 | 151466973 |
| chr1 | 151500087 | 151500330 |
| chr1 | 151500330 | 151500569 |
| chr1 | 151500569 | 151500841 |
| chr1 | 151500841 | 151501337 |
| chr1 | 151515747 | 151515980 |
| chr1 | 151550462 | 151550647 |
| chr1 | 151550647 | 151550843 |
| chr1 | 151564439 | 151564732 |
| chr1 | 151568774 | 151569026 |
| chr1 | 151571218 | 151571605 |
| chr1 | 151571605 | 151571937 |
| chr1 | 151571991 | 151572174 |
| chr1 | 151572698 | 151572923 |
| chr1 | 151582096 | 151582288 |
| chr1 | 151602120 | 151602389 |
| chr1 | 151610690 | 151610928 |
| chr1 | 151616557 | 151616885 |
| chr1 | 151616885 | 151617186 |
| chr1 | 151618319 | 151618604 |
| chr1 | 151618839 | 151619085 |
| chr1 | 151630041 | 151630191 |
| chr1 | 151646431 | 151646589 |
| chr1 | 151651177 | 151651442 |
| chr1 | 151651442 | 151651718 |
| chr1 | 151672916 | 151673121 |
| chr1 | 151675608 | 151676129 |
| chr1 | 151676699 | 151677042 |
| chr1 | 151677101 | 151677275 |

|      |           |           |
|------|-----------|-----------|
| chr1 | 151678081 | 151678489 |
| chr1 | 151679232 | 151679582 |
| chr1 | 151679958 | 151680143 |
| chr1 | 151685090 | 151685406 |
| chr1 | 151686025 | 151686317 |
| chr1 | 151686781 | 151687098 |
| chr1 | 151689090 | 151689467 |
| chr1 | 151689592 | 151689909 |
| chr1 | 151690619 | 151690893 |
| chr1 | 151692983 | 151693156 |
| chr1 | 151698308 | 151698570 |
| chr1 | 151706080 | 151706445 |
| chr1 | 151716459 | 151716610 |
| chr1 | 151719639 | 151719809 |
| chr1 | 151719900 | 151720050 |
| chr1 | 151732732 | 151733044 |
| chr1 | 151735493 | 151735651 |
| chr1 | 151754924 | 151755416 |
| chr1 | 151755416 | 151755717 |
| chr1 | 151755717 | 151755918 |
| chr1 | 151755918 | 151756105 |
| chr1 | 151766241 | 151766466 |
| chr1 | 151766884 | 151767177 |
| chr1 | 151800226 | 151800923 |
| chr1 | 151800923 | 151801531 |
| chr1 | 151801619 | 151801858 |
| chr1 | 151801858 | 151802214 |
| chr1 | 151802214 | 151802560 |
| chr1 | 151802560 | 151802820 |
| chr1 | 151872550 | 151872731 |
| chr1 | 151872861 | 151873459 |
| chr1 | 151875252 | 151875562 |
| chr1 | 151875564 | 151875750 |
| chr1 | 151907073 | 151907636 |
| chr1 | 151943696 | 151944027 |
| chr1 | 152063047 | 152063354 |
| chr1 | 152063354 | 152063773 |
| chr1 | 152063805 | 152064118 |
| chr1 | 152084636 | 152084980 |
| chr1 | 152085021 | 152085210 |
| chr1 | 152089528 | 152089726 |
| chr1 | 152089726 | 152090076 |



|      |           |           |
|------|-----------|-----------|
| chr1 | 152090076 | 152090569 |
| chr1 | 152090569 | 152091055 |
| chr1 | 152105338 | 152105587 |
| chr1 | 152106198 | 152106445 |
| chr1 | 152141446 | 152141616 |
| chr1 | 152201595 | 152201755 |
| chr1 | 152218097 | 152218427 |
| chr1 | 152223255 | 152223426 |
| chr1 | 152225009 | 152225200 |
| chr1 | 152226130 | 152226298 |
| chr1 | 152230341 | 152230543 |
| chr1 | 152260150 | 152260419 |
| chr1 | 152271758 | 152272026 |
| chr1 | 152273620 | 152273990 |
| chr1 | 152274028 | 152274379 |
| chr1 | 152278329 | 152278618 |
| chr1 | 152386097 | 152386561 |
| chr1 | 152386561 | 152386866 |
| chr1 | 152399726 | 152400031 |
| chr1 | 152400031 | 152400277 |
| chr1 | 152400277 | 152400536 |
| chr1 | 152400621 | 152400794 |
| chr1 | 152437715 | 152438066 |
| chr1 | 152439442 | 152439748 |
| chr1 | 152439952 | 152440250 |
| chr1 | 152497650 | 152497966 |
| chr1 | 152499916 | 152500136 |
| chr1 | 152511265 | 152511601 |
| chr1 | 152520864 | 152521121 |
| chr1 | 152524244 | 152524402 |
| chr1 | 152524899 | 152525334 |
| chr1 | 152536384 | 152536915 |
| chr1 | 152538250 | 152538563 |
| chr1 | 152551047 | 152551341 |
| chr1 | 152555937 | 152556560 |
| chr1 | 152556560 | 152556886 |
| chr1 | 152562048 | 152562484 |
| chr1 | 152581316 | 152581472 |
| chr1 | 152585045 | 152585278 |
| chr1 | 152585523 | 152585920 |
| chr1 | 152611586 | 152611746 |
| chr1 | 152624603 | 152624965 |

|      |           |           |
|------|-----------|-----------|
| chr1 | 152624965 | 152625471 |
| chr1 | 152632031 | 152632198 |
| chr1 | 152651794 | 152652045 |
| chr1 | 152660848 | 152661050 |
| chr1 | 152663942 | 152664154 |
| chr1 | 152669542 | 152669813 |
| chr1 | 152669813 | 152670189 |
| chr1 | 152678600 | 152678771 |
| chr1 | 152746524 | 152746799 |
| chr1 | 152766058 | 152766490 |
| chr1 | 152766490 | 152766847 |
| chr1 | 152766847 | 152767236 |
| chr1 | 152768094 | 152768463 |
| chr1 | 152776903 | 152777182 |
| chr1 | 152778726 | 152778876 |
| chr1 | 152779076 | 152779370 |
| chr1 | 152779370 | 152779677 |
| chr1 | 152790272 | 152790550 |
| chr1 | 152794477 | 152794682 |
| chr1 | 152815196 | 152815488 |
| chr1 | 152817443 | 152817722 |
| chr1 | 152820783 | 152821224 |
| chr1 | 152831055 | 152831347 |
| chr1 | 152831840 | 152831990 |
| chr1 | 152832362 | 152832520 |
| chr1 | 152833010 | 152833243 |
| chr1 | 152844772 | 152844923 |
| chr1 | 152902045 | 152902321 |
| chr1 | 152902321 | 152902573 |
| chr1 | 152902573 | 152902984 |
| chr1 | 152902984 | 152903309 |
| chr1 | 152903309 | 152903532 |
| chr1 | 152903574 | 152903850 |
| chr1 | 152904546 | 152904878 |
| chr1 | 152915891 | 152916094 |
| chr1 | 152916933 | 152917113 |
| chr1 | 152917353 | 152917537 |
| chr1 | 152917566 | 152917932 |
| chr1 | 152921738 | 152922336 |
| chr1 | 152923149 | 152923317 |
| chr1 | 152956108 | 152956289 |
| chr1 | 152956289 | 152956540 |

|      |           |           |
|------|-----------|-----------|
| chr1 | 153000089 | 153000320 |
| chr1 | 153000320 | 153000570 |
| chr1 | 153000570 | 153000874 |
| chr1 | 153009328 | 153009676 |
| chr1 | 153010504 | 153011028 |
| chr1 | 153011554 | 153011930 |
| chr1 | 153011930 | 153012231 |
| chr1 | 153022851 | 153023083 |
| chr1 | 153035605 | 153035755 |
| chr1 | 153040048 | 153040656 |
| chr1 | 153041130 | 153041344 |
| chr1 | 153048126 | 153048464 |
| chr1 | 153049625 | 153050327 |
| chr1 | 153059720 | 153059967 |
| chr1 | 153066417 | 153066749 |
| chr1 | 153068506 | 153068673 |
| chr1 | 153069273 | 153069576 |
| chr1 | 153076039 | 153076214 |
| chr1 | 153084225 | 153084530 |
| chr1 | 153085114 | 153085718 |
| chr1 | 153091630 | 153091985 |
| chr1 | 153091985 | 153092294 |
| chr1 | 153092294 | 153092613 |
| chr1 | 153092613 | 153092928 |
| chr1 | 153101595 | 153101777 |
| chr1 | 153102320 | 153102894 |
| chr1 | 153102894 | 153103167 |
| chr1 | 153115352 | 153115505 |
| chr1 | 153120495 | 153120818 |
| chr1 | 153121281 | 153121738 |
| chr1 | 153126408 | 153126758 |
| chr1 | 153126758 | 153127077 |
| chr1 | 153129755 | 153130059 |
| chr1 | 153130059 | 153130355 |
| chr1 | 153130372 | 153130733 |
| chr1 | 153130774 | 153130924 |
| chr1 | 153132265 | 153132419 |
| chr1 | 153136682 | 153136917 |
| chr1 | 153140670 | 153141407 |
| chr1 | 153141505 | 153141655 |
| chr1 | 153141844 | 153142143 |
| chr1 | 153153413 | 153154009 |

|      |           |           |
|------|-----------|-----------|
| chr1 | 153163923 | 153164190 |
| chr1 | 153172195 | 153172648 |
| chr1 | 153173367 | 153173661 |
| chr1 | 153174805 | 153175223 |
| chr1 | 153180624 | 153180909 |
| chr1 | 153185723 | 153186379 |
| chr1 | 153186379 | 153186730 |
| chr1 | 153186808 | 153187044 |
| chr1 | 153187044 | 153187398 |
| chr1 | 153188184 | 153188375 |
| chr1 | 153200699 | 153200889 |
| chr1 | 153202149 | 153202584 |
| chr1 | 153204050 | 153204485 |
| chr1 | 153206975 | 153207561 |
| chr1 | 153215644 | 153215837 |
| chr1 | 153215837 | 153216024 |
| chr1 | 153224282 | 153224651 |
| chr1 | 153238054 | 153238385 |
| chr1 | 153241940 | 153242127 |
| chr1 | 153266607 | 153266844 |
| chr1 | 153266954 | 153267154 |
| chr1 | 153268313 | 153268736 |
| chr1 | 153268745 | 153268895 |
| chr1 | 153269004 | 153269229 |
| chr1 | 153269757 | 153270020 |
| chr1 | 153270063 | 153270316 |
| chr1 | 153274660 | 153275000 |
| chr1 | 153277590 | 153277871 |
| chr1 | 153278154 | 153278384 |
| chr1 | 153283083 | 153283288 |
| chr1 | 153292207 | 153292776 |
| chr1 | 153299423 | 153299793 |
| chr1 | 153300345 | 153300861 |
| chr1 | 153301404 | 153301554 |
| chr1 | 153304602 | 153304849 |
| chr1 | 153304849 | 153305183 |
| chr1 | 153321315 | 153321817 |
| chr1 | 153321856 | 153322009 |
| chr1 | 153332031 | 153332550 |
| chr1 | 153332550 | 153333034 |
| chr1 | 153333034 | 153333325 |
| chr1 | 153333325 | 153333673 |

|      |           |           |
|------|-----------|-----------|
| chr1 | 153333713 | 153334093 |
| chr1 | 153351047 | 153351413 |
| chr1 | 153386538 | 153387047 |
| chr1 | 153401606 | 153402125 |
| chr1 | 153407782 | 153408000 |
| chr1 | 153414773 | 153414940 |
| chr1 | 153424245 | 153424782 |
| chr1 | 153424782 | 153425462 |
| chr1 | 153446200 | 153446401 |
| chr1 | 153451326 | 153451553 |
| chr1 | 153452613 | 153452782 |
| chr1 | 153453185 | 153453444 |
| chr1 | 153453465 | 153453701 |
| chr1 | 153460755 | 153461048 |
| chr1 | 153480463 | 153480709 |
| chr1 | 153480733 | 153480976 |
| chr1 | 153481007 | 153481290 |
| chr1 | 153486190 | 153486387 |
| chr1 | 153486772 | 153487019 |
| chr1 | 153487019 | 153487277 |
| chr1 | 153487277 | 153487581 |
| chr1 | 153487581 | 153487925 |
| chr1 | 153493485 | 153493636 |
| chr1 | 153500206 | 153500357 |
| chr1 | 153506569 | 153506855 |
| chr1 | 153506855 | 153507191 |
| chr1 | 153540844 | 153540999 |
| chr1 | 153549586 | 153549872 |
| chr1 | 153550869 | 153551146 |
| chr1 | 153556206 | 153556521 |
| chr1 | 153556967 | 153557235 |
| chr1 | 153559308 | 153559584 |
| chr1 | 153559620 | 153560103 |
| chr1 | 153560103 | 153560408 |
| chr1 | 153564680 | 153565033 |
| chr1 | 153565244 | 153565368 |
| chr1 | 153565368 | 153565496 |
| chr1 | 153565728 | 153566097 |
| chr1 | 153566097 | 153566465 |
| chr1 | 153572057 | 153572710 |
| chr1 | 153572712 | 153572980 |
| chr1 | 153572980 | 153573252 |

|      |           |           |
|------|-----------|-----------|
| chr1 | 153573252 | 153573557 |
| chr1 | 153583103 | 153583696 |
| chr1 | 153585383 | 153585690 |
| chr1 | 153585690 | 153586077 |
| chr1 | 153588029 | 153588258 |
| chr1 | 153598932 | 153599094 |
| chr1 | 153599409 | 153599754 |
| chr1 | 153604233 | 153604506 |
| chr1 | 153631137 | 153631577 |
| chr1 | 153635113 | 153635898 |
| chr1 | 153648508 | 153648781 |
| chr1 | 153648781 | 153649056 |
| chr1 | 153652805 | 153653069 |
| chr1 | 153653749 | 153654028 |
| chr1 | 153661407 | 153661710 |
| chr1 | 153661710 | 153661990 |
| chr1 | 153661990 | 153662298 |
| chr1 | 153662501 | 153662657 |
| chr1 | 153669126 | 153669363 |
| chr1 | 153679803 | 153679974 |
| chr1 | 153689746 | 153689977 |
| chr1 | 153690678 | 153690828 |
| chr1 | 153691036 | 153691570 |
| chr1 | 153717841 | 153718013 |
| chr1 | 153736168 | 153736396 |
| chr1 | 153740130 | 153740569 |
| chr1 | 153742805 | 153743121 |
| chr1 | 153746215 | 153746453 |
| chr1 | 153746791 | 153747045 |
| chr1 | 153749276 | 153749608 |
| chr1 | 153749608 | 153750003 |
| chr1 | 153751042 | 153751257 |
| chr1 | 153751760 | 153752312 |
| chr1 | 153752542 | 153752762 |
| chr1 | 153769686 | 153770005 |
| chr1 | 153770005 | 153770394 |
| chr1 | 153770985 | 153771184 |
| chr1 | 153771787 | 153772182 |
| chr1 | 153775306 | 153775546 |
| chr1 | 153788990 | 153789175 |
| chr1 | 153789175 | 153789368 |
| chr1 | 153807461 | 153807668 |

|      |           |           |
|------|-----------|-----------|
| chr1 | 153835841 | 153836069 |
| chr1 | 153836102 | 153836429 |
| chr1 | 153837842 | 153838088 |
| chr1 | 153842327 | 153842534 |
| chr1 | 153846976 | 153847255 |
| chr1 | 153855931 | 153856105 |
| chr1 | 153857008 | 153857358 |
| chr1 | 153874996 | 153875286 |
| chr1 | 153892317 | 153892643 |
| chr1 | 153894252 | 153894645 |
| chr1 | 153899622 | 153900035 |
| chr1 | 153900035 | 153900381 |
| chr1 | 153900446 | 153900725 |
| chr1 | 153922753 | 153922905 |
| chr1 | 153924121 | 153924632 |
| chr1 | 153937435 | 153937676 |
| chr1 | 153940296 | 153940458 |
| chr1 | 153986325 | 153986617 |
| chr1 | 153986617 | 153987021 |
| chr1 | 153987055 | 153987313 |
| chr1 | 153999888 | 154000096 |
| chr1 | 154004059 | 154004234 |
| chr1 | 154021985 | 154022507 |
| chr1 | 154032620 | 154033016 |
| chr1 | 154033884 | 154034192 |
| chr1 | 154034192 | 154034682 |
| chr1 | 154061846 | 154062196 |
| chr1 | 154064647 | 154065008 |
| chr1 | 154065135 | 154066007 |
| chr1 | 154069897 | 154070283 |
| chr1 | 154086037 | 154086393 |
| chr1 | 154086478 | 154086944 |
| chr1 | 154091204 | 154091360 |
| chr1 | 154094393 | 154094710 |
| chr1 | 154100619 | 154100867 |
| chr1 | 154112455 | 154112844 |
| chr1 | 154118092 | 154118358 |
| chr1 | 154118514 | 154118704 |
| chr1 | 154118704 | 154118964 |
| chr1 | 154125102 | 154125341 |
| chr1 | 154126612 | 154126822 |
| chr1 | 154149117 | 154149269 |

|      |           |           |
|------|-----------|-----------|
| chr1 | 154150062 | 154150439 |
| chr1 | 154150439 | 154150914 |
| chr1 | 154178278 | 154178543 |
| chr1 | 154178543 | 154178874 |
| chr1 | 154181018 | 154181277 |
| chr1 | 154187054 | 154187232 |
| chr1 | 154206825 | 154206983 |
| chr1 | 154207011 | 154207173 |
| chr1 | 154207185 | 154207386 |
| chr1 | 154207555 | 154207782 |
| chr1 | 154207886 | 154208153 |
| chr1 | 154461577 | 154461857 |
| chr1 | 154500599 | 154500799 |
| chr1 | 154528888 | 154529206 |
| chr1 | 154729663 | 154729889 |
| chr1 | 154786241 | 154786575 |
| chr1 | 154788145 | 154788379 |
| chr1 | 154875789 | 154876273 |
| chr1 | 154936104 | 154936309 |
| chr1 | 154970602 | 154970937 |
| chr1 | 155006522 | 155006911 |
| chr1 | 155007227 | 155007410 |
| chr1 | 155011102 | 155011295 |
| chr1 | 155013764 | 155014164 |
| chr1 | 155014164 | 155014516 |
| chr1 | 155025844 | 155026137 |
| chr1 | 155027639 | 155027893 |
| chr1 | 155035569 | 155035719 |
| chr1 | 155035918 | 155036142 |
| chr1 | 155040137 | 155040710 |
| chr1 | 155040936 | 155041086 |
| chr1 | 155041683 | 155041910 |
| chr1 | 155049019 | 155049325 |
| chr1 | 155049343 | 155049509 |
| chr1 | 155050166 | 155050654 |
| chr1 | 155051003 | 155051486 |
| chr1 | 155056110 | 155056421 |
| chr1 | 155057053 | 155057236 |
| chr1 | 155057809 | 155058301 |
| chr1 | 155071479 | 155071807 |
| chr1 | 155073743 | 155073992 |
| chr1 | 155073992 | 155074217 |



|      |           |           |
|------|-----------|-----------|
| chr1 | 155074792 | 155075345 |
| chr1 | 155075889 | 155076319 |
| chr1 | 155082935 | 155083476 |
| chr1 | 155083476 | 155083986 |
| chr1 | 155084007 | 155084270 |
| chr1 | 155091329 | 155091711 |
| chr1 | 155093143 | 155093865 |
| chr1 | 155098700 | 155099271 |
| chr1 | 155099271 | 155099894 |
| chr1 | 155107923 | 155108131 |
| chr1 | 155108226 | 155109096 |
| chr1 | 155115306 | 155115640 |
| chr1 | 155115640 | 155115827 |
| chr1 | 155121949 | 155122303 |
| chr1 | 155138558 | 155138881 |
| chr1 | 155138881 | 155139427 |
| chr1 | 155140173 | 155140406 |
| chr1 | 155146717 | 155146961 |
| chr1 | 155152969 | 155153142 |
| chr1 | 155158436 | 155158914 |
| chr1 | 155158914 | 155159335 |
| chr1 | 155163601 | 155163770 |
| chr1 | 155171947 | 155172097 |
| chr1 | 155172973 | 155173139 |
| chr1 | 155173623 | 155174069 |
| chr1 | 155184288 | 155184515 |
| chr1 | 155201045 | 155201331 |
| chr1 | 155201331 | 155201632 |
| chr1 | 155201632 | 155201922 |
| chr1 | 155201922 | 155202190 |
| chr1 | 155214976 | 155215393 |
| chr1 | 155215393 | 155215843 |
| chr1 | 155216020 | 155216199 |
| chr1 | 155216235 | 155216523 |
| chr1 | 155224033 | 155224858 |
| chr1 | 155244101 | 155244452 |
| chr1 | 155244452 | 155244732 |
| chr1 | 155273023 | 155273354 |
| chr1 | 155281382 | 155281578 |
| chr1 | 155281578 | 155281858 |
| chr1 | 155293524 | 155293714 |
| chr1 | 155416624 | 155417186 |

|      |           |           |
|------|-----------|-----------|
| chr1 | 155417186 | 155417668 |
| chr1 | 155472659 | 155472874 |
| chr1 | 155493367 | 155493671 |
| chr1 | 155510203 | 155510798 |
| chr1 | 155516755 | 155516923 |
| chr1 | 155527425 | 155527684 |
| chr1 | 155529267 | 155529569 |
| chr1 | 155533129 | 155533438 |
| chr1 | 155537319 | 155537573 |
| chr1 | 155557776 | 155558073 |
| chr1 | 155558073 | 155558412 |
| chr1 | 155558412 | 155558661 |
| chr1 | 155558661 | 155558918 |
| chr1 | 155564841 | 155565062 |
| chr1 | 155576510 | 155576735 |
| chr1 | 155670752 | 155670913 |
| chr1 | 155722254 | 155722482 |
| chr1 | 155740742 | 155740975 |
| chr1 | 155741048 | 155741368 |
| chr1 | 155741581 | 155741788 |
| chr1 | 155741956 | 155742358 |
| chr1 | 155742358 | 155742643 |
| chr1 | 155742643 | 155742939 |
| chr1 | 155742939 | 155743190 |
| chr1 | 155784908 | 155785132 |
| chr1 | 155785979 | 155786206 |
| chr1 | 155792016 | 155792194 |
| chr1 | 155792249 | 155792542 |
| chr1 | 155801627 | 155802035 |
| chr1 | 155809701 | 155810086 |
| chr1 | 155810086 | 155810433 |
| chr1 | 155810575 | 155810820 |
| chr1 | 155810820 | 155810991 |
| chr1 | 155812362 | 155812754 |
| chr1 | 155812754 | 155813061 |
| chr1 | 155815930 | 155816141 |
| chr1 | 155816141 | 155816400 |
| chr1 | 155832764 | 155833093 |
| chr1 | 155837587 | 155837891 |
| chr1 | 155875243 | 155875476 |
| chr1 | 155972516 | 155972680 |
| chr1 | 155972686 | 155973116 |

|      |           |           |
|------|-----------|-----------|
| chr1 | 155973116 | 155973484 |
| chr1 | 155973484 | 155973782 |
| chr1 | 155990968 | 155991288 |
| chr1 | 155994697 | 155994867 |
| chr1 | 156010554 | 156010794 |
| chr1 | 156010957 | 156011339 |
| chr1 | 156035449 | 156035883 |
| chr1 | 156035883 | 156036319 |
| chr1 | 156036319 | 156036775 |
| chr1 | 156040665 | 156041009 |
| chr1 | 156041960 | 156042119 |
| chr1 | 156043112 | 156043337 |
| chr1 | 156045973 | 156046163 |
| chr1 | 156066122 | 156066435 |
| chr1 | 156070148 | 156070523 |
| chr1 | 156085822 | 156086154 |
| chr1 | 156096767 | 156097046 |
| chr1 | 156204721 | 156204926 |
| chr1 | 156204926 | 156205092 |
| chr1 | 156217410 | 156217740 |
| chr1 | 156218103 | 156218325 |
| chr1 | 156222146 | 156222967 |
| chr1 | 156224973 | 156225200 |
| chr1 | 156229523 | 156229758 |
| chr1 | 156230644 | 156230996 |
| chr1 | 156241125 | 156241548 |
| chr1 | 156241790 | 156242044 |
| chr1 | 156242090 | 156242241 |
| chr1 | 156261609 | 156261773 |
| chr1 | 156263397 | 156263635 |
| chr1 | 156264004 | 156264425 |
| chr1 | 156275933 | 156276083 |
| chr1 | 156302879 | 156303470 |
| chr1 | 156303470 | 156303812 |
| chr1 | 156340923 | 156341162 |
| chr1 | 156344268 | 156344937 |
| chr1 | 156349141 | 156349385 |
| chr1 | 156393098 | 156393301 |
| chr1 | 156420586 | 156420995 |
| chr1 | 156420995 | 156421329 |
| chr1 | 156437794 | 156438053 |
| chr1 | 156450608 | 156450818 |

|      |           |           |
|------|-----------|-----------|
| chr1 | 156454454 | 156454735 |
| chr1 | 156455105 | 156455308 |
| chr1 | 156464319 | 156464539 |
| chr1 | 156464539 | 156464765 |
| chr1 | 156467976 | 156468223 |
| chr1 | 156468629 | 156468938 |
| chr1 | 156473073 | 156473311 |
| chr1 | 156473885 | 156474706 |
| chr1 | 156477373 | 156477523 |
| chr1 | 156479274 | 156479652 |
| chr1 | 156507448 | 156507760 |
| chr1 | 156507760 | 156508329 |
| chr1 | 156511197 | 156511409 |
| chr1 | 156515408 | 156515568 |
| chr1 | 156520462 | 156520683 |
| chr1 | 156521011 | 156521173 |
| chr1 | 156523921 | 156524158 |
| chr1 | 156538540 | 156538690 |
| chr1 | 156540257 | 156540463 |
| chr1 | 156558386 | 156558629 |
| chr1 | 156558629 | 156558972 |
| chr1 | 156558972 | 156559283 |
| chr1 | 156559283 | 156559675 |
| chr1 | 156566265 | 156566464 |
| chr1 | 156584314 | 156584464 |
| chr1 | 156590380 | 156590645 |
| chr1 | 156593251 | 156593699 |
| chr1 | 156598580 | 156598802 |
| chr1 | 156598802 | 156599043 |
| chr1 | 156605252 | 156605414 |
| chr1 | 156605431 | 156605581 |
| chr1 | 156605603 | 156605815 |
| chr1 | 156605980 | 156606257 |
| chr1 | 156614797 | 156614952 |
| chr1 | 156615331 | 156616158 |
| chr1 | 156616990 | 156617266 |
| chr1 | 156620191 | 156620391 |
| chr1 | 156620430 | 156620715 |
| chr1 | 156622270 | 156622541 |
| chr1 | 156622569 | 156622733 |
| chr1 | 156626780 | 156627032 |
| chr1 | 156631049 | 156631283 |

|      |           |           |
|------|-----------|-----------|
| chr1 | 156633049 | 156633508 |
| chr1 | 156639365 | 156639838 |
| chr1 | 156639838 | 156640111 |
| chr1 | 156640706 | 156640901 |
| chr1 | 156642918 | 156643092 |
| chr1 | 156649727 | 156649880 |
| chr1 | 156650549 | 156650837 |
| chr1 | 156654822 | 156655006 |
| chr1 | 156657534 | 156657731 |
| chr1 | 156658221 | 156658521 |
| chr1 | 156658618 | 156658930 |
| chr1 | 156659956 | 156660145 |
| chr1 | 156660145 | 156660339 |
| chr1 | 156660552 | 156660702 |
| chr1 | 156665990 | 156666257 |
| chr1 | 156667068 | 156667279 |
| chr1 | 156667279 | 156667498 |
| chr1 | 156667498 | 156667991 |
| chr1 | 156673887 | 156674183 |
| chr1 | 156674183 | 156674524 |
| chr1 | 156674524 | 156674907 |
| chr1 | 156677280 | 156677703 |
| chr1 | 156678166 | 156678398 |
| chr1 | 156679674 | 156679929 |
| chr1 | 156680325 | 156680488 |
| chr1 | 156718292 | 156718873 |
| chr1 | 156718873 | 156719322 |
| chr1 | 156741691 | 156741926 |
| chr1 | 156741929 | 156742192 |
| chr1 | 156742218 | 156742399 |
| chr1 | 156743943 | 156744113 |
| chr1 | 156752503 | 156752653 |
| chr1 | 156790251 | 156790460 |
| chr1 | 156791144 | 156791334 |
| chr1 | 156861772 | 156861991 |
| chr1 | 156862904 | 156863059 |
| chr1 | 156912000 | 156912270 |
| chr1 | 156917542 | 156917771 |
| chr1 | 156938689 | 156939146 |
| chr1 | 156939146 | 156939467 |
| chr1 | 156939467 | 156939729 |
| chr1 | 156939729 | 156939960 |

|      |           |           |
|------|-----------|-----------|
| chr1 | 156939960 | 156940202 |
| chr1 | 156940222 | 156940508 |
| chr1 | 156971222 | 156971656 |
| chr1 | 156987603 | 156987944 |
| chr1 | 156991164 | 156991485 |
| chr1 | 156993186 | 156993400 |
| chr1 | 156995094 | 156995646 |
| chr1 | 156997889 | 156998389 |
| chr1 | 157000751 | 157000941 |
| chr1 | 157000997 | 157001512 |
| chr1 | 157011139 | 157011844 |
| chr1 | 157019918 | 157020177 |
| chr1 | 157035642 | 157035809 |
| chr1 | 157046695 | 157046986 |
| chr1 | 157061241 | 157061493 |
| chr1 | 157061493 | 157061770 |
| chr1 | 157061770 | 157062088 |
| chr1 | 157062088 | 157062378 |
| chr1 | 157062451 | 157062741 |
| chr1 | 157073563 | 157073995 |
| chr1 | 157074441 | 157074634 |
| chr1 | 157075071 | 157075314 |
| chr1 | 157076347 | 157076604 |
| chr1 | 157076834 | 157077143 |
| chr1 | 157077162 | 157077381 |
| chr1 | 157079402 | 157079700 |
| chr1 | 157079700 | 157079938 |
| chr1 | 157079938 | 157080157 |
| chr1 | 157081095 | 157081372 |
| chr1 | 157081372 | 157081897 |
| chr1 | 157084840 | 157084994 |
| chr1 | 157086196 | 157086410 |
| chr1 | 157090787 | 157091397 |
| chr1 | 157091474 | 157091662 |
| chr1 | 157126793 | 157127104 |
| chr1 | 157127104 | 157127365 |
| chr1 | 157127804 | 157128051 |
| chr1 | 157134741 | 157135110 |
| chr1 | 157219530 | 157219832 |
| chr1 | 157232410 | 157232754 |
| chr1 | 157232754 | 157233145 |
| chr1 | 157248091 | 157248395 |

|      |           |           |
|------|-----------|-----------|
| chr1 | 157256521 | 157256951 |
| chr1 | 157286637 | 157286872 |
| chr1 | 157301318 | 157301609 |
| chr1 | 157319038 | 157319203 |
| chr1 | 157320477 | 157320702 |
| chr1 | 157343538 | 157343890 |
| chr1 | 157347582 | 157347789 |
| chr1 | 157353902 | 157354052 |
| chr1 | 157368256 | 157368721 |
| chr1 | 157380495 | 157380755 |
| chr1 | 157380755 | 157381167 |
| chr1 | 157393155 | 157393602 |
| chr1 | 157411687 | 157412095 |
| chr1 | 157412095 | 157412498 |
| chr1 | 157412498 | 157412877 |
| chr1 | 157412899 | 157413111 |
| chr1 | 157437783 | 157438287 |
| chr1 | 157438287 | 157438591 |
| chr1 | 157440213 | 157440475 |
| chr1 | 157446433 | 157446583 |
| chr1 | 157458432 | 157458641 |
| chr1 | 157480962 | 157481218 |
| chr1 | 157481769 | 157481970 |
| chr1 | 157499224 | 157499595 |
| chr1 | 157512689 | 157513011 |
| chr1 | 157518188 | 157518505 |
| chr1 | 157536640 | 157536807 |
| chr1 | 157553100 | 157553422 |
| chr1 | 157578854 | 157579075 |
| chr1 | 157594660 | 157594867 |
| chr1 | 157599460 | 157599615 |
| chr1 | 157604505 | 157604798 |
| chr1 | 157631881 | 157632118 |
| chr1 | 157632611 | 157633109 |
| chr1 | 157633275 | 157633483 |
| chr1 | 157633499 | 157633929 |
| chr1 | 157634501 | 157634746 |
| chr1 | 157634826 | 157635086 |
| chr1 | 157645738 | 157646405 |
| chr1 | 157648554 | 157648787 |
| chr1 | 157663631 | 157663807 |
| chr1 | 157672242 | 157672887 |

|      |           |           |
|------|-----------|-----------|
| chr1 | 157680313 | 157680588 |
| chr1 | 157680762 | 157681061 |
| chr1 | 157707756 | 157707925 |
| chr1 | 157717048 | 157717608 |
| chr1 | 157717693 | 157717855 |
| chr1 | 157745702 | 157745921 |
| chr1 | 157825150 | 157825310 |
| chr1 | 157858119 | 157858377 |
| chr1 | 157874872 | 157875607 |
| chr1 | 157877213 | 157877389 |
| chr1 | 157905092 | 157905247 |
| chr1 | 158102680 | 158102830 |
| chr1 | 158198176 | 158198583 |
| chr1 | 158201443 | 158201749 |
| chr1 | 158212820 | 158213001 |
| chr1 | 158213822 | 158213999 |
| chr1 | 158241295 | 158241567 |
| chr1 | 158247728 | 158247904 |
| chr1 | 158248700 | 158249075 |
| chr1 | 158249119 | 158249305 |
| chr1 | 158255929 | 158256375 |
| chr1 | 158256433 | 158256583 |
| chr1 | 158310564 | 158310714 |
| chr1 | 158355950 | 158356551 |
| chr1 | 158597174 | 158597324 |
| chr1 | 158605614 | 158605892 |
| chr1 | 158606222 | 158606580 |
| chr1 | 158654668 | 158654884 |
| chr1 | 158670265 | 158670507 |
| chr1 | 158699305 | 158699625 |
| chr1 | 158701333 | 158701827 |
| chr1 | 158765851 | 158766175 |
| chr1 | 158830189 | 158830499 |
| chr1 | 158853008 | 158853189 |
| chr1 | 158853225 | 158853591 |
| chr1 | 158864067 | 158864217 |
| chr1 | 158897200 | 158897711 |
| chr1 | 158917107 | 158917414 |
| chr1 | 158935123 | 158935335 |
| chr1 | 158935335 | 158935802 |
| chr1 | 158935886 | 158936125 |
| chr1 | 158936370 | 158936603 |



|      |           |           |
|------|-----------|-----------|
| chr1 | 158947990 | 158948376 |
| chr1 | 158948442 | 158948687 |
| chr1 | 158948799 | 158949044 |
| chr1 | 158953608 | 158953861 |
| chr1 | 159073228 | 159073448 |
| chr1 | 159082230 | 159082537 |
| chr1 | 159135392 | 159135587 |
| chr1 | 159231763 | 159232049 |
| chr1 | 159232049 | 159232439 |
| chr1 | 159232439 | 159232825 |
| chr1 | 159232905 | 159233088 |
| chr1 | 159234602 | 159234839 |
| chr1 | 159253171 | 159253321 |
| chr1 | 159390157 | 159390321 |
| chr1 | 159392734 | 159393168 |
| chr1 | 159393168 | 159393548 |
| chr1 | 159402804 | 159403072 |
| chr1 | 159404664 | 159404909 |
| chr1 | 159460940 | 159461157 |
| chr1 | 159471012 | 159471261 |
| chr1 | 159523599 | 159523812 |
| chr1 | 159524143 | 159524384 |
| chr1 | 159595703 | 159596168 |
| chr1 | 159596168 | 159596517 |
| chr1 | 159596707 | 159596909 |
| chr1 | 159658151 | 159658435 |
| chr1 | 159660686 | 159660881 |
| chr1 | 159660881 | 159661129 |
| chr1 | 159686391 | 159686865 |
| chr1 | 159686865 | 159687274 |
| chr1 | 159693881 | 159694068 |
| chr1 | 159694068 | 159694286 |
| chr1 | 159702123 | 159702290 |
| chr1 | 159765121 | 159765271 |
| chr1 | 159812781 | 159813229 |
| chr1 | 159817038 | 159817420 |
| chr1 | 159827637 | 159827871 |
| chr1 | 159828653 | 159828835 |
| chr1 | 159832368 | 159832597 |
| chr1 | 159833003 | 159833572 |
| chr1 | 159843608 | 159843863 |
| chr1 | 159843863 | 159844317 |

|      |           |           |
|------|-----------|-----------|
| chr1 | 159852222 | 159852408 |
| chr1 | 159884231 | 159884413 |
| chr1 | 159888699 | 159888986 |
| chr1 | 159889043 | 159889386 |
| chr1 | 159889386 | 159889999 |
| chr1 | 159890662 | 159890905 |
| chr1 | 159911082 | 159911354 |
| chr1 | 159917243 | 159917602 |
| chr1 | 159932202 | 159932373 |
| chr1 | 159982581 | 159982810 |
| chr1 | 159986252 | 159986479 |
| chr1 | 159992150 | 159992494 |
| chr1 | 159997315 | 159997888 |
| chr1 | 160006003 | 160006760 |
| chr1 | 160025645 | 160025878 |
| chr1 | 160039971 | 160040372 |
| chr1 | 160044199 | 160044762 |
| chr1 | 160044762 | 160045043 |
| chr1 | 160052599 | 160052878 |
| chr1 | 160052971 | 160053276 |
| chr1 | 160053496 | 160053671 |
| chr1 | 160053882 | 160054202 |
| chr1 | 160054202 | 160054425 |
| chr1 | 160057355 | 160057605 |
| chr1 | 160057674 | 160058059 |
| chr1 | 160060010 | 160060318 |
| chr1 | 160060437 | 160060794 |
| chr1 | 160060794 | 160061060 |
| chr1 | 160073140 | 160073649 |
| chr1 | 160079474 | 160079664 |
| chr1 | 160080897 | 160081131 |
| chr1 | 160081131 | 160081407 |
| chr1 | 160082763 | 160082956 |
| chr1 | 160082999 | 160083149 |
| chr1 | 160084440 | 160084608 |
| chr1 | 160086791 | 160086997 |
| chr1 | 160088001 | 160088379 |
| chr1 | 160091755 | 160092018 |
| chr1 | 160101031 | 160101215 |
| chr1 | 160150701 | 160151260 |
| chr1 | 160175340 | 160175585 |
| chr1 | 160184603 | 160184834 |

|      |           |           |
|------|-----------|-----------|
| chr1 | 160194838 | 160195329 |
| chr1 | 160195329 | 160195638 |
| chr1 | 160212133 | 160212397 |
| chr1 | 160212397 | 160212761 |
| chr1 | 160212761 | 160213163 |
| chr1 | 160213163 | 160213467 |
| chr1 | 160227844 | 160228136 |
| chr1 | 160233980 | 160234285 |
| chr1 | 160261878 | 160262168 |
| chr1 | 160263168 | 160263353 |
| chr1 | 160263704 | 160263884 |
| chr1 | 160264012 | 160264213 |
| chr1 | 160267361 | 160267724 |
| chr1 | 160271679 | 160271851 |
| chr1 | 160280697 | 160280891 |
| chr1 | 160297249 | 160297422 |
| chr1 | 160297842 | 160298087 |
| chr1 | 160308996 | 160309422 |
| chr1 | 160311985 | 160312158 |
| chr1 | 160327585 | 160327854 |
| chr1 | 160370709 | 160370895 |
| chr1 | 160372069 | 160372229 |
| chr1 | 160373378 | 160373688 |
| chr1 | 160378461 | 160378622 |
| chr1 | 160408034 | 160408296 |
| chr1 | 160509528 | 160509693 |
| chr1 | 160509747 | 160510420 |
| chr1 | 160520138 | 160520381 |
| chr1 | 160520660 | 160521172 |
| chr1 | 160521291 | 160521567 |
| chr1 | 160531428 | 160531818 |
| chr1 | 160542106 | 160542609 |
| chr1 | 160548617 | 160548767 |
| chr1 | 160550596 | 160551038 |
| chr1 | 160561484 | 160561653 |
| chr1 | 160595972 | 160596282 |
| chr1 | 160596282 | 160596633 |
| chr1 | 160596688 | 160596932 |
| chr1 | 160596932 | 160597185 |
| chr1 | 160597367 | 160597746 |
| chr1 | 160692974 | 160693444 |
| chr1 | 160704635 | 160704981 |

|      |           |           |
|------|-----------|-----------|
| chr1 | 160717836 | 160717986 |
| chr1 | 160734645 | 160734925 |
| chr1 | 160734972 | 160735158 |
| chr1 | 160735396 | 160735655 |
| chr1 | 160750695 | 160751138 |
| chr1 | 160758332 | 160758542 |
| chr1 | 160791905 | 160792230 |
| chr1 | 160792230 | 160792654 |
| chr1 | 160792654 | 160792985 |
| chr1 | 160792985 | 160793276 |
| chr1 | 160819849 | 160820010 |
| chr1 | 160834584 | 160834734 |
| chr1 | 160863138 | 160863340 |
| chr1 | 160867898 | 160868236 |
| chr1 | 160874812 | 160874986 |
| chr1 | 160877031 | 160877358 |
| chr1 | 160878448 | 160879085 |
| chr1 | 160881357 | 160881672 |
| chr1 | 160891083 | 160891667 |
| chr1 | 160905909 | 160906312 |
| chr1 | 160906312 | 160906504 |
| chr1 | 160906504 | 160906713 |
| chr1 | 160906713 | 160906954 |
| chr1 | 160906954 | 160907206 |
| chr1 | 160934271 | 160934451 |
| chr1 | 160980039 | 160980290 |
| chr1 | 161034251 | 161034925 |
| chr1 | 161034925 | 161035310 |
| chr1 | 161035310 | 161035641 |
| chr1 | 161039068 | 161039259 |
| chr1 | 161039577 | 161040001 |
| chr1 | 161040001 | 161040436 |
| chr1 | 161040436 | 161040846 |
| chr1 | 161041111 | 161041262 |
| chr1 | 161041753 | 161041915 |
| chr1 | 161070310 | 161070566 |
| chr1 | 161070566 | 161070929 |
| chr1 | 161070929 | 161071247 |
| chr1 | 161071305 | 161071641 |
| chr1 | 161071660 | 161071865 |
| chr1 | 161130856 | 161131093 |
| chr1 | 161131093 | 161131335 |

|      |           |           |
|------|-----------|-----------|
| chr1 | 161131335 | 161131689 |
| chr1 | 161140094 | 161140386 |
| chr1 | 161140386 | 161140796 |
| chr1 | 161143928 | 161144180 |
| chr1 | 161148368 | 161148713 |
| chr1 | 161158638 | 161158839 |
| chr1 | 161159256 | 161159510 |
| chr1 | 161170592 | 161171100 |
| chr1 | 161180788 | 161180938 |
| chr1 | 161195516 | 161195810 |
| chr1 | 161195810 | 161196053 |
| chr1 | 161196053 | 161196365 |
| chr1 | 161214556 | 161214806 |
| chr1 | 161229846 | 161230411 |
| chr1 | 161239228 | 161239405 |
| chr1 | 161248787 | 161248985 |
| chr1 | 161250098 | 161250358 |
| chr1 | 161250543 | 161250775 |
| chr1 | 161250775 | 161251056 |
| chr1 | 161251056 | 161251372 |
| chr1 | 161251372 | 161251695 |
| chr1 | 161281100 | 161281413 |
| chr1 | 161286779 | 161287025 |
| chr1 | 161301440 | 161301649 |
| chr1 | 161327134 | 161327284 |
| chr1 | 161327315 | 161327753 |
| chr1 | 161328144 | 161328342 |
| chr1 | 161351048 | 161351292 |
| chr1 | 161364995 | 161365339 |
| chr1 | 161394542 | 161394855 |
| chr1 | 161400220 | 161400438 |
| chr1 | 161406334 | 161406825 |
| chr1 | 161409107 | 161409381 |
| chr1 | 161424482 | 161424635 |
| chr1 | 161436535 | 161436756 |
| chr1 | 161436756 | 161437109 |
| chr1 | 161444689 | 161444929 |
| chr1 | 161444929 | 161445246 |
| chr1 | 161451361 | 161451693 |
| chr1 | 161451731 | 161452323 |
| chr1 | 161479917 | 161480100 |
| chr1 | 161482225 | 161482693 |

|      |           |           |
|------|-----------|-----------|
| chr1 | 161487251 | 161487465 |
| chr1 | 161494505 | 161494655 |
| chr1 | 161497351 | 161497677 |
| chr1 | 161506453 | 161506662 |
| chr1 | 161507740 | 161508060 |
| chr1 | 161576754 | 161576917 |
| chr1 | 161598768 | 161598954 |
| chr1 | 161601207 | 161601406 |
| chr1 | 161607527 | 161607757 |
| chr1 | 161610484 | 161610657 |
| chr1 | 161614268 | 161614456 |
| chr1 | 161621201 | 161621731 |
| chr1 | 161621731 | 161622055 |
| chr1 | 161628350 | 161628532 |
| chr1 | 161688920 | 161689251 |
| chr1 | 161704620 | 161704772 |
| chr1 | 161727492 | 161727678 |
| chr1 | 161734681 | 161735205 |
| chr1 | 161735205 | 161735493 |
| chr1 | 161735521 | 161735776 |
| chr1 | 161744303 | 161744609 |
| chr1 | 161744798 | 161745199 |
| chr1 | 161748225 | 161748439 |
| chr1 | 161748774 | 161748966 |
| chr1 | 161749218 | 161749402 |
| chr1 | 161750300 | 161750571 |
| chr1 | 161750612 | 161751032 |
| chr1 | 161766630 | 161766982 |
| chr1 | 161767304 | 161767509 |
| chr1 | 161799915 | 161800089 |
| chr1 | 161875857 | 161876041 |
| chr1 | 161876232 | 161876589 |
| chr1 | 161876589 | 161876864 |
| chr1 | 161876864 | 161877113 |
| chr1 | 161877180 | 161877432 |
| chr1 | 161886545 | 161886995 |
| chr1 | 161896216 | 161896394 |
| chr1 | 161912910 | 161913218 |
| chr1 | 161913425 | 161913575 |
| chr1 | 161913744 | 161913901 |
| chr1 | 161963055 | 161963260 |
| chr1 | 161968811 | 161969535 |

|      |           |           |
|------|-----------|-----------|
| chr1 | 161976248 | 161976451 |
| chr1 | 161976451 | 161976765 |
| chr1 | 161999876 | 162000031 |
| chr1 | 162006167 | 162006465 |
| chr1 | 162016618 | 162016821 |
| chr1 | 162039103 | 162039500 |
| chr1 | 162076496 | 162077005 |
| chr1 | 162125886 | 162126386 |
| chr1 | 162132962 | 162133297 |
| chr1 | 162133297 | 162133596 |
| chr1 | 162133718 | 162133973 |
| chr1 | 162207317 | 162207544 |
| chr1 | 162215719 | 162216148 |
| chr1 | 162224896 | 162225176 |
| chr1 | 162225614 | 162226186 |
| chr1 | 162243061 | 162243255 |
| chr1 | 162243404 | 162243747 |
| chr1 | 162313698 | 162313927 |
| chr1 | 162358131 | 162358339 |
| chr1 | 162359279 | 162359525 |
| chr1 | 162388858 | 162389030 |
| chr1 | 162428977 | 162429245 |
| chr1 | 162449194 | 162449521 |
| chr1 | 162449570 | 162449750 |
| chr1 | 162453528 | 162454008 |
| chr1 | 162462884 | 162463261 |
| chr1 | 162463993 | 162464321 |
| chr1 | 162464465 | 162464796 |
| chr1 | 162476683 | 162477188 |
| chr1 | 162477188 | 162477452 |
| chr1 | 162477452 | 162477664 |
| chr1 | 162477664 | 162477887 |
| chr1 | 162477887 | 162478253 |
| chr1 | 162508707 | 162508915 |
| chr1 | 162509208 | 162509709 |
| chr1 | 162509709 | 162509968 |
| chr1 | 162529758 | 162529982 |
| chr1 | 162531702 | 162531915 |
| chr1 | 162547768 | 162547931 |
| chr1 | 162548003 | 162548208 |
| chr1 | 162548208 | 162548441 |
| chr1 | 162548441 | 162548725 |

|      |           |           |
|------|-----------|-----------|
| chr1 | 162548725 | 162548938 |
| chr1 | 162554997 | 162555147 |
| chr1 | 162561704 | 162561963 |
| chr1 | 162565048 | 162565292 |
| chr1 | 162566731 | 162566934 |
| chr1 | 162568593 | 162568788 |
| chr1 | 162570207 | 162570882 |
| chr1 | 162570882 | 162571282 |
| chr1 | 162571427 | 162571657 |
| chr1 | 162582718 | 162582920 |
| chr1 | 162620559 | 162620709 |
| chr1 | 162650283 | 162650511 |
| chr1 | 162665171 | 162665464 |
| chr1 | 162665508 | 162665700 |
| chr1 | 162665700 | 162665877 |
| chr1 | 162665877 | 162666070 |
| chr1 | 162693823 | 162694058 |
| chr1 | 162739857 | 162740197 |
| chr1 | 162740197 | 162740438 |
| chr1 | 162740438 | 162740793 |
| chr1 | 162745647 | 162745802 |
| chr1 | 162746019 | 162746449 |
| chr1 | 162754726 | 162754886 |
| chr1 | 162763861 | 162764128 |
| chr1 | 162773573 | 162774081 |
| chr1 | 162792424 | 162792825 |
| chr1 | 162792825 | 162793230 |
| chr1 | 162830482 | 162830659 |
| chr1 | 162832329 | 162832538 |
| chr1 | 162859853 | 162860408 |
| chr1 | 162892123 | 162892296 |
| chr1 | 162892296 | 162892486 |
| chr1 | 162952981 | 162953451 |
| chr1 | 162953451 | 162953773 |
| chr1 | 163070592 | 163070805 |
| chr1 | 163089591 | 163089811 |
| chr1 | 163091611 | 163091847 |
| chr1 | 163091847 | 163092110 |
| chr1 | 163112546 | 163112950 |
| chr1 | 163112950 | 163113285 |
| chr1 | 163113676 | 163114388 |
| chr1 | 163114834 | 163115067 |



|      |           |           |
|------|-----------|-----------|
| chr1 | 163126141 | 163126381 |
| chr1 | 163130071 | 163130275 |
| chr1 | 163142825 | 163143062 |
| chr1 | 163143062 | 163143416 |
| chr1 | 163143416 | 163143713 |
| chr1 | 163150499 | 163150834 |
| chr1 | 163181871 | 163182195 |
| chr1 | 163209308 | 163209543 |
| chr1 | 163273181 | 163273553 |
| chr1 | 163274906 | 163275253 |
| chr1 | 163285266 | 163285463 |
| chr1 | 163291926 | 163292410 |
| chr1 | 163293104 | 163293476 |
| chr1 | 163311899 | 163312225 |
| chr1 | 163312264 | 163312704 |
| chr1 | 163345037 | 163345197 |
| chr1 | 163380099 | 163380282 |
| chr1 | 163382068 | 163382408 |
| chr1 | 163382408 | 163382985 |
| chr1 | 163399788 | 163399975 |
| chr1 | 163403389 | 163403822 |
| chr1 | 163403822 | 163404124 |
| chr1 | 163426377 | 163426651 |
| chr1 | 163453195 | 163453412 |
| chr1 | 163466178 | 163466401 |
| chr1 | 163466476 | 163466752 |
| chr1 | 163496147 | 163496312 |
| chr1 | 163511144 | 163511427 |
| chr1 | 163512828 | 163513231 |
| chr1 | 163561077 | 163561402 |
| chr1 | 163562380 | 163562640 |
| chr1 | 163563942 | 163564182 |
| chr1 | 163574487 | 163574779 |
| chr1 | 163575691 | 163575941 |
| chr1 | 163576544 | 163576729 |
| chr1 | 163654174 | 163654369 |
| chr1 | 163654369 | 163654685 |
| chr1 | 163655735 | 163656144 |
| chr1 | 163656558 | 163656800 |
| chr1 | 163656800 | 163657024 |
| chr1 | 163779316 | 163779781 |
| chr1 | 163779781 | 163780132 |

|      |           |           |
|------|-----------|-----------|
| chr1 | 163894350 | 163894557 |
| chr1 | 163907002 | 163907282 |
| chr1 | 163907282 | 163907533 |
| chr1 | 163907699 | 163907881 |
| chr1 | 163907881 | 163908095 |
| chr1 | 163910221 | 163910371 |
| chr1 | 163910429 | 163910658 |
| chr1 | 163928905 | 163929157 |
| chr1 | 163929565 | 163929858 |
| chr1 | 163929858 | 163930148 |
| chr1 | 163930148 | 163930443 |
| chr1 | 163930443 | 163930862 |
| chr1 | 163974428 | 163974688 |
| chr1 | 163994252 | 163994560 |
| chr1 | 163994560 | 163994929 |
| chr1 | 163994929 | 163995199 |
| chr1 | 163995199 | 163995410 |
| chr1 | 163995465 | 163995617 |
| chr1 | 164009382 | 164009532 |
| chr1 | 164014191 | 164014433 |
| chr1 | 164030935 | 164031153 |
| chr1 | 164061378 | 164061528 |
| chr1 | 164070501 | 164070666 |
| chr1 | 164113390 | 164113754 |
| chr1 | 164114297 | 164114714 |
| chr1 | 164115007 | 164115279 |
| chr1 | 164123794 | 164124165 |
| chr1 | 164126147 | 164126554 |
| chr1 | 164135302 | 164135911 |
| chr1 | 164135911 | 164136353 |
| chr1 | 164138707 | 164138947 |
| chr1 | 164149192 | 164149378 |
| chr1 | 164151725 | 164151986 |
| chr1 | 164174395 | 164174704 |
| chr1 | 164184593 | 164184854 |
| chr1 | 164208488 | 164208776 |
| chr1 | 164209284 | 164209606 |
| chr1 | 164223947 | 164224146 |
| chr1 | 164229007 | 164229166 |
| chr1 | 164238166 | 164238332 |
| chr1 | 164242933 | 164243143 |
| chr1 | 164248486 | 164248956 |

|      |           |           |
|------|-----------|-----------|
| chr1 | 164248956 | 164249341 |
| chr1 | 164249341 | 164249720 |
| chr1 | 164250307 | 164250716 |
| chr1 | 164250826 | 164251026 |
| chr1 | 164260276 | 164260426 |
| chr1 | 164261547 | 164261887 |
| chr1 | 164266459 | 164266749 |
| chr1 | 164271035 | 164271185 |
| chr1 | 164271565 | 164271889 |
| chr1 | 164275424 | 164275744 |
| chr1 | 164275744 | 164276008 |
| chr1 | 164276664 | 164276951 |
| chr1 | 164306967 | 164307367 |
| chr1 | 164307387 | 164307904 |
| chr1 | 164308080 | 164308230 |
| chr1 | 164315334 | 164315536 |
| chr1 | 164316650 | 164317026 |
| chr1 | 164330197 | 164330363 |
| chr1 | 164347235 | 164347611 |
| chr1 | 164366625 | 164367056 |
| chr1 | 164389844 | 164390002 |
| chr1 | 164418958 | 164419406 |
| chr1 | 164419436 | 164419871 |
| chr1 | 164421075 | 164421282 |
| chr1 | 164425205 | 164425383 |
| chr1 | 164450793 | 164451037 |
| chr1 | 164451195 | 164451777 |
| chr1 | 164457575 | 164457776 |
| chr1 | 164457782 | 164458194 |
| chr1 | 164458194 | 164458606 |
| chr1 | 164458606 | 164459048 |
| chr1 | 164461909 | 164462082 |
| chr1 | 164467976 | 164468262 |
| chr1 | 164481389 | 164482123 |
| chr1 | 164493111 | 164493356 |
| chr1 | 164494808 | 164495116 |
| chr1 | 164495162 | 164495441 |
| chr1 | 164495441 | 164495703 |
| chr1 | 164503276 | 164503665 |
| chr1 | 164539848 | 164540009 |
| chr1 | 164540016 | 164540215 |
| chr1 | 164621302 | 164621586 |

|      |           |           |
|------|-----------|-----------|
| chr1 | 164622309 | 164622792 |
| chr1 | 164623014 | 164623266 |
| chr1 | 164628851 | 164629455 |
| chr1 | 164631730 | 164632050 |
| chr1 | 164644609 | 164644894 |
| chr1 | 164666347 | 164666628 |
| chr1 | 164669600 | 164669884 |
| chr1 | 164708025 | 164708196 |
| chr1 | 164714112 | 164714365 |
| chr1 | 164714365 | 164714594 |
| chr1 | 164745037 | 164745240 |
| chr1 | 164762406 | 164762566 |
| chr1 | 164812776 | 164813046 |
| chr1 | 164831219 | 164831386 |
| chr1 | 164855755 | 164856009 |
| chr1 | 164861080 | 164861390 |
| chr1 | 164861510 | 164861760 |
| chr1 | 164863038 | 164863250 |
| chr1 | 164864558 | 164864953 |
| chr1 | 164868960 | 164869121 |
| chr1 | 164874743 | 164875000 |
| chr1 | 164880919 | 164881083 |
| chr1 | 164887666 | 164888164 |
| chr1 | 164888365 | 164888613 |
| chr1 | 164888613 | 164888924 |
| chr1 | 164898777 | 164899055 |
| chr1 | 164899055 | 164899374 |
| chr1 | 164905147 | 164905357 |
| chr1 | 164969492 | 164969642 |
| chr1 | 164975620 | 164976148 |
| chr1 | 164977414 | 164977691 |
| chr1 | 164986766 | 164987022 |
| chr1 | 164987121 | 164987335 |
| chr1 | 164987758 | 164988387 |
| chr1 | 164993150 | 164993522 |
| chr1 | 164993522 | 164993826 |
| chr1 | 164993826 | 164994147 |
| chr1 | 164994147 | 164994485 |
| chr1 | 164994488 | 164994682 |
| chr1 | 164999274 | 164999581 |
| chr1 | 164999581 | 164999844 |
| chr1 | 165018815 | 165019113 |

|      |           |           |
|------|-----------|-----------|
| chr1 | 165032549 | 165032870 |
| chr1 | 165032873 | 165033609 |
| chr1 | 165035807 | 165035970 |
| chr1 | 165043429 | 165043606 |
| chr1 | 165046046 | 165046480 |
| chr1 | 165046555 | 165046952 |
| chr1 | 165075665 | 165075888 |
| chr1 | 165075888 | 165076149 |
| chr1 | 165084215 | 165084523 |
| chr1 | 165089582 | 165089867 |
| chr1 | 165091873 | 165092033 |
| chr1 | 165104639 | 165105029 |
| chr1 | 165120428 | 165120663 |
| chr1 | 165120663 | 165120855 |
| chr1 | 165132562 | 165132718 |
| chr1 | 165185325 | 165185610 |
| chr1 | 165190763 | 165191144 |
| chr1 | 165192997 | 165193247 |
| chr1 | 165193818 | 165194280 |
| chr1 | 165194280 | 165194587 |
| chr1 | 165194587 | 165194847 |
| chr1 | 165203556 | 165203813 |
| chr1 | 165203813 | 165204061 |
| chr1 | 165236234 | 165236825 |
| chr1 | 165236825 | 165237403 |
| chr1 | 165247239 | 165247407 |
| chr1 | 165252108 | 165252258 |
| chr1 | 165280723 | 165280900 |
| chr1 | 165281369 | 165281581 |
| chr1 | 165281597 | 165282233 |
| chr1 | 165282233 | 165282742 |
| chr1 | 165282746 | 165282896 |
| chr1 | 165289904 | 165290146 |
| chr1 | 165291697 | 165291884 |
| chr1 | 165295022 | 165295278 |
| chr1 | 165299470 | 165299832 |
| chr1 | 165302545 | 165302812 |
| chr1 | 165302812 | 165303200 |
| chr1 | 165303200 | 165303603 |
| chr1 | 165316451 | 165316619 |
| chr1 | 165320417 | 165320885 |
| chr1 | 165432651 | 165432909 |

|      |           |           |
|------|-----------|-----------|
| chr1 | 165432941 | 165433205 |
| chr1 | 165433205 | 165433417 |
| chr1 | 165438744 | 165438941 |
| chr1 | 165459968 | 165460358 |
| chr1 | 165460358 | 165460799 |
| chr1 | 165460810 | 165461516 |
| chr1 | 165492760 | 165492916 |
| chr1 | 165543863 | 165544051 |
| chr1 | 165576915 | 165577078 |
| chr1 | 165583574 | 165583840 |
| chr1 | 165583840 | 165584039 |
| chr1 | 165586357 | 165586693 |
| chr1 | 165603150 | 165603632 |
| chr1 | 165608894 | 165609102 |
| chr1 | 165617219 | 165617469 |
| chr1 | 165630082 | 165630362 |
| chr1 | 165633973 | 165634334 |
| chr1 | 165634334 | 165634883 |
| chr1 | 165641528 | 165641764 |
| chr1 | 165641841 | 165642171 |
| chr1 | 165642227 | 165642479 |
| chr1 | 165642479 | 165642742 |
| chr1 | 165642742 | 165642940 |
| chr1 | 165642940 | 165643125 |
| chr1 | 165643125 | 165643358 |
| chr1 | 165643695 | 165643982 |
| chr1 | 165655082 | 165655330 |
| chr1 | 165658667 | 165658961 |
| chr1 | 165660841 | 165661083 |
| chr1 | 165670187 | 165670404 |
| chr1 | 165672540 | 165672700 |
| chr1 | 165691637 | 165691853 |
| chr1 | 165707946 | 165708134 |
| chr1 | 165730733 | 165730966 |
| chr1 | 165736200 | 165736471 |
| chr1 | 165751965 | 165752216 |
| chr1 | 165758398 | 165758580 |
| chr1 | 165758580 | 165758751 |
| chr1 | 165763541 | 165763878 |
| chr1 | 165763878 | 165764419 |
| chr1 | 165769020 | 165769260 |
| chr1 | 165769260 | 165769493 |

|      |           |           |
|------|-----------|-----------|
| chr1 | 165771578 | 165771905 |
| chr1 | 165775625 | 165775777 |
| chr1 | 165780337 | 165780565 |
| chr1 | 165780629 | 165780831 |
| chr1 | 165789992 | 165790207 |
| chr1 | 165802540 | 165802765 |
| chr1 | 165817350 | 165817619 |
| chr1 | 165840765 | 165840994 |
| chr1 | 165840994 | 165841128 |
| chr1 | 165844360 | 165844681 |
| chr1 | 165844681 | 165845002 |
| chr1 | 165845002 | 165845349 |
| chr1 | 165845349 | 165845801 |
| chr1 | 165853781 | 165854070 |
| chr1 | 165858244 | 165858462 |
| chr1 | 165858462 | 165858716 |
| chr1 | 165863597 | 165863751 |
| chr1 | 165864030 | 165864256 |
| chr1 | 165879861 | 165880123 |
| chr1 | 165880123 | 165880450 |
| chr1 | 165891755 | 165891945 |
| chr1 | 166001310 | 166001460 |
| chr1 | 166001768 | 166002072 |
| chr1 | 166002072 | 166002398 |
| chr1 | 166002480 | 166002880 |
| chr1 | 166002880 | 166003191 |
| chr1 | 166003191 | 166003613 |
| chr1 | 166008769 | 166008924 |
| chr1 | 166008993 | 166009304 |
| chr1 | 166009304 | 166009643 |
| chr1 | 166038658 | 166038823 |
| chr1 | 166043693 | 166044137 |
| chr1 | 166044137 | 166044474 |
| chr1 | 166045378 | 166045598 |
| chr1 | 166079633 | 166079892 |
| chr1 | 166086354 | 166086628 |
| chr1 | 166089719 | 166089963 |
| chr1 | 166094486 | 166094742 |
| chr1 | 166130229 | 166130524 |
| chr1 | 166130524 | 166130779 |
| chr1 | 166137457 | 166138060 |
| chr1 | 166138060 | 166138557 |

|      |           |           |
|------|-----------|-----------|
| chr1 | 166149230 | 166149595 |
| chr1 | 166153403 | 166153731 |
| chr1 | 166154190 | 166154508 |
| chr1 | 166160681 | 166160941 |
| chr1 | 166160963 | 166161122 |
| chr1 | 166174986 | 166175146 |
| chr1 | 166180268 | 166180418 |
| chr1 | 166253958 | 166254300 |
| chr1 | 166255613 | 166256052 |
| chr1 | 166267354 | 166267525 |
| chr1 | 166308990 | 166309251 |
| chr1 | 166309251 | 166309530 |
| chr1 | 166313715 | 166313937 |
| chr1 | 166319226 | 166319403 |
| chr1 | 166360220 | 166360514 |
| chr1 | 166374201 | 166374454 |
| chr1 | 166378807 | 166379079 |
| chr1 | 166379079 | 166379370 |
| chr1 | 166379370 | 166379723 |
| chr1 | 166379723 | 166380019 |
| chr1 | 166380019 | 166380235 |
| chr1 | 166409035 | 166409332 |
| chr1 | 166409332 | 166409661 |
| chr1 | 166409661 | 166410153 |
| chr1 | 166429015 | 166429222 |
| chr1 | 166448376 | 166448533 |
| chr1 | 166639324 | 166639512 |
| chr1 | 166639725 | 166640142 |
| chr1 | 166651456 | 166651760 |
| chr1 | 166651876 | 166652171 |
| chr1 | 166652171 | 166652542 |
| chr1 | 166652916 | 166653073 |
| chr1 | 166737266 | 166737478 |
| chr1 | 166782196 | 166782378 |
| chr1 | 166784666 | 166784851 |
| chr1 | 166787560 | 166787925 |
| chr1 | 166787925 | 166788421 |
| chr1 | 166793703 | 166793993 |
| chr1 | 166836373 | 166836546 |
| chr1 | 166839880 | 166840052 |
| chr1 | 166895988 | 166896138 |
| chr1 | 166899821 | 166900084 |



|      |           |           |
|------|-----------|-----------|
| chr1 | 166900084 | 166900338 |
| chr1 | 166924215 | 166924542 |
| chr1 | 166942265 | 166942542 |
| chr1 | 166944398 | 166944898 |
| chr1 | 166944957 | 166945432 |
| chr1 | 166964614 | 166964933 |
| chr1 | 166968224 | 166968685 |
| chr1 | 166970786 | 166971093 |
| chr1 | 166973835 | 166974027 |
| chr1 | 166996871 | 166997341 |
| chr1 | 166997392 | 166997663 |
| chr1 | 167000488 | 167000890 |
| chr1 | 167000890 | 167001157 |
| chr1 | 167001157 | 167001406 |
| chr1 | 167001406 | 167001642 |
| chr1 | 167002523 | 167002819 |
| chr1 | 167101337 | 167101719 |
| chr1 | 167212348 | 167212625 |
| chr1 | 167220432 | 167220622 |
| chr1 | 167220622 | 167220872 |
| chr1 | 167220927 | 167221249 |
| chr1 | 167230996 | 167231305 |
| chr1 | 167231886 | 167232251 |
| chr1 | 167232251 | 167232556 |
| chr1 | 167233008 | 167233206 |
| chr1 | 167234090 | 167234267 |
| chr1 | 167234388 | 167234676 |
| chr1 | 167242040 | 167242665 |
| chr1 | 167242716 | 167243019 |
| chr1 | 167243019 | 167243237 |
| chr1 | 167243512 | 167243761 |
| chr1 | 167249848 | 167250167 |
| chr1 | 167254108 | 167254570 |
| chr1 | 167254620 | 167254772 |
| chr1 | 167255511 | 167255890 |
| chr1 | 167255968 | 167256164 |
| chr1 | 167261782 | 167262096 |
| chr1 | 167262549 | 167263028 |
| chr1 | 167265502 | 167265662 |
| chr1 | 167269639 | 167269794 |
| chr1 | 167269878 | 167270318 |
| chr1 | 167270318 | 167270692 |

|      |           |           |
|------|-----------|-----------|
| chr1 | 167270692 | 167270956 |
| chr1 | 167270956 | 167271197 |
| chr1 | 167278974 | 167279557 |
| chr1 | 167283723 | 167283957 |
| chr1 | 167284249 | 167284737 |
| chr1 | 167284737 | 167285369 |
| chr1 | 167285423 | 167285709 |
| chr1 | 167300157 | 167300344 |
| chr1 | 167306608 | 167306764 |
| chr1 | 167308101 | 167308820 |
| chr1 | 167308820 | 167309080 |
| chr1 | 167337501 | 167337779 |
| chr1 | 167340136 | 167340582 |
| chr1 | 167349303 | 167349529 |
| chr1 | 167349733 | 167350061 |
| chr1 | 167350061 | 167350313 |
| chr1 | 167350313 | 167350563 |
| chr1 | 167350563 | 167350819 |
| chr1 | 167369780 | 167370267 |
| chr1 | 167374050 | 167374327 |
| chr1 | 167374460 | 167374656 |
| chr1 | 167374725 | 167374925 |
| chr1 | 167381374 | 167381683 |
| chr1 | 167386935 | 167387288 |
| chr1 | 167387288 | 167387673 |
| chr1 | 167387673 | 167387988 |
| chr1 | 167392557 | 167392827 |
| chr1 | 167392827 | 167393146 |
| chr1 | 167393230 | 167393460 |
| chr1 | 167393460 | 167393685 |
| chr1 | 167393685 | 167393971 |
| chr1 | 167393988 | 167394271 |
| chr1 | 167394271 | 167394523 |
| chr1 | 167414995 | 167415159 |
| chr1 | 167425939 | 167426170 |
| chr1 | 167426487 | 167426687 |
| chr1 | 167426835 | 167426995 |
| chr1 | 167446543 | 167446856 |
| chr1 | 167486932 | 167487275 |
| chr1 | 167490370 | 167490656 |
| chr1 | 167551661 | 167551877 |
| chr1 | 167598361 | 167598592 |

|      |           |           |
|------|-----------|-----------|
| chr1 | 167637004 | 167637327 |
| chr1 | 167638107 | 167638300 |
| chr1 | 167644977 | 167645222 |
| chr1 | 167660842 | 167661115 |
| chr1 | 167661190 | 167661457 |
| chr1 | 167669856 | 167670110 |
| chr1 | 167672619 | 167672955 |
| chr1 | 167674969 | 167675155 |
| chr1 | 167803035 | 167803259 |
| chr1 | 167806297 | 167806447 |
| chr1 | 167903733 | 167903913 |
| chr1 | 168057611 | 168057771 |
| chr1 | 168109327 | 168109515 |
| chr1 | 168109917 | 168110077 |
| chr1 | 168133708 | 168134075 |
| chr1 | 168138769 | 168139025 |
| chr1 | 168139288 | 168139551 |
| chr1 | 168139620 | 168139926 |
| chr1 | 168139926 | 168140232 |
| chr1 | 168214181 | 168214467 |
| chr1 | 168217588 | 168217748 |
| chr1 | 168220708 | 168221035 |
| chr1 | 168221035 | 168221333 |
| chr1 | 168221384 | 168221533 |
| chr1 | 168221533 | 168221675 |
| chr1 | 168228977 | 168229150 |
| chr1 | 168230137 | 168230498 |
| chr1 | 168237263 | 168237507 |
| chr1 | 168238042 | 168238225 |
| chr1 | 168239657 | 168239955 |
| chr1 | 168271937 | 168272087 |
| chr1 | 168272102 | 168272481 |
| chr1 | 168278282 | 168278453 |
| chr1 | 168278477 | 168278770 |
| chr1 | 168278770 | 168279118 |
| chr1 | 168279123 | 168279506 |
| chr1 | 168279648 | 168279882 |
| chr1 | 168283424 | 168283791 |
| chr1 | 168283791 | 168284131 |
| chr1 | 168312786 | 168313020 |
| chr1 | 168313842 | 168314056 |
| chr1 | 168319053 | 168319288 |

|      |           |           |
|------|-----------|-----------|
| chr1 | 168322992 | 168323197 |
| chr1 | 168323811 | 168324087 |
| chr1 | 168334932 | 168335207 |
| chr1 | 168335259 | 168335525 |
| chr1 | 168355059 | 168355219 |
| chr1 | 168362436 | 168362909 |
| chr1 | 168364338 | 168364494 |
| chr1 | 168374922 | 168375307 |
| chr1 | 168382883 | 168383104 |
| chr1 | 168390781 | 168390999 |
| chr1 | 168390999 | 168391245 |
| chr1 | 168391250 | 168391615 |
| chr1 | 168391615 | 168392061 |
| chr1 | 168392126 | 168392404 |
| chr1 | 168402637 | 168403027 |
| chr1 | 168411942 | 168412098 |
| chr1 | 168415236 | 168415538 |
| chr1 | 168417175 | 168417425 |
| chr1 | 168426427 | 168426640 |
| chr1 | 168431351 | 168431549 |
| chr1 | 168431800 | 168432297 |
| chr1 | 168432297 | 168432792 |
| chr1 | 168473295 | 168473464 |
| chr1 | 168494543 | 168494890 |
| chr1 | 168501870 | 168502202 |
| chr1 | 168502202 | 168502843 |
| chr1 | 168507819 | 168508142 |
| chr1 | 168518050 | 168518318 |
| chr1 | 168518318 | 168518570 |
| chr1 | 168518570 | 168518868 |
| chr1 | 168545540 | 168545708 |
| chr1 | 168560667 | 168560895 |
| chr1 | 168561265 | 168561590 |
| chr1 | 168583939 | 168584638 |
| chr1 | 168598086 | 168598791 |
| chr1 | 168600963 | 168601413 |
| chr1 | 168631946 | 168632397 |
| chr1 | 168637225 | 168637494 |
| chr1 | 168694577 | 168694727 |
| chr1 | 168708134 | 168708456 |
| chr1 | 168708456 | 168708667 |
| chr1 | 168708684 | 168708876 |

|      |           |           |
|------|-----------|-----------|
| chr1 | 168709005 | 168709230 |
| chr1 | 168709235 | 168709509 |
| chr1 | 168709551 | 168709735 |
| chr1 | 168709753 | 168709924 |
| chr1 | 168709946 | 168710221 |
| chr1 | 168710284 | 168710476 |
| chr1 | 168728780 | 168728930 |
| chr1 | 168772072 | 168772226 |
| chr1 | 168783713 | 168784235 |
| chr1 | 168798400 | 168798567 |
| chr1 | 168832024 | 168832316 |
| chr1 | 168838241 | 168838554 |
| chr1 | 168950987 | 168951205 |
| chr1 | 168967458 | 168967652 |
| chr1 | 168975334 | 168975779 |
| chr1 | 169047221 | 169047472 |
| chr1 | 169368311 | 169368546 |
| chr1 | 169368732 | 169369107 |
| chr1 | 169438632 | 169438810 |
| chr1 | 169445419 | 169445635 |
| chr1 | 169459444 | 169459720 |
| chr1 | 169485639 | 169485988 |
| chr1 | 169517552 | 169517865 |
| chr1 | 169517865 | 169518352 |
| chr1 | 169520489 | 169520658 |
| chr1 | 169526026 | 169526288 |
| chr1 | 169526419 | 169526604 |
| chr1 | 169530273 | 169530489 |
| chr1 | 169530981 | 169531137 |
| chr1 | 169531248 | 169531749 |
| chr1 | 169531749 | 169531995 |
| chr1 | 169532206 | 169532393 |
| chr1 | 169555081 | 169555375 |
| chr1 | 169555375 | 169555534 |
| chr1 | 169555637 | 169556154 |
| chr1 | 169558588 | 169558813 |
| chr1 | 169562859 | 169563016 |
| chr1 | 169579448 | 169579876 |
| chr1 | 169591599 | 169591802 |
| chr1 | 169600862 | 169601053 |
| chr1 | 169601984 | 169602209 |
| chr1 | 169625354 | 169625790 |

|      |           |           |
|------|-----------|-----------|
| chr1 | 169625790 | 169626283 |
| chr1 | 169638598 | 169638900 |
| chr1 | 169638900 | 169639117 |
| chr1 | 169642186 | 169642390 |
| chr1 | 169642432 | 169642684 |
| chr1 | 169643882 | 169644285 |
| chr1 | 169670728 | 169670936 |
| chr1 | 169674207 | 169674428 |
| chr1 | 169675179 | 169675329 |
| chr1 | 169693167 | 169693355 |
| chr1 | 169693554 | 169694141 |
| chr1 | 169695390 | 169695643 |
| chr1 | 169699181 | 169699535 |
| chr1 | 169703819 | 169704137 |
| chr1 | 169704388 | 169704736 |
| chr1 | 169704736 | 169705150 |
| chr1 | 169720928 | 169721143 |
| chr1 | 169728960 | 169729123 |
| chr1 | 169730773 | 169730963 |
| chr1 | 169732713 | 169733238 |
| chr1 | 169774525 | 169774703 |
| chr1 | 169775476 | 169775672 |
| chr1 | 169776599 | 169776926 |
| chr1 | 169804892 | 169805390 |
| chr1 | 169840112 | 169840432 |
| chr1 | 169840432 | 169840701 |
| chr1 | 169894855 | 169895102 |
| chr1 | 169918033 | 169918360 |
| chr1 | 169919239 | 169919517 |
| chr1 | 169921061 | 169921295 |
| chr1 | 169921662 | 169921883 |
| chr1 | 169934105 | 169934310 |
| chr1 | 169936459 | 169936635 |
| chr1 | 169947690 | 169947951 |
| chr1 | 169968847 | 169969554 |
| chr1 | 169969559 | 169969754 |
| chr1 | 169977607 | 169978007 |
| chr1 | 169998706 | 169999165 |
| chr1 | 170003010 | 170003341 |
| chr1 | 170004342 | 170004655 |
| chr1 | 170006545 | 170006936 |
| chr1 | 170008526 | 170008854 |

|      |           |           |
|------|-----------|-----------|
| chr1 | 170008880 | 170009077 |
| chr1 | 170009339 | 170009953 |
| chr1 | 170015871 | 170016200 |
| chr1 | 170023082 | 170023281 |
| chr1 | 170037860 | 170038045 |
| chr1 | 170042975 | 170043182 |
| chr1 | 170043182 | 170043371 |
| chr1 | 170044937 | 170045280 |
| chr1 | 170054110 | 170054312 |
| chr1 | 170057451 | 170057668 |
| chr1 | 170058101 | 170058448 |
| chr1 | 170059370 | 170059783 |
| chr1 | 170062721 | 170063105 |
| chr1 | 170069240 | 170069489 |
| chr1 | 170079391 | 170079785 |
| chr1 | 170080900 | 170081254 |
| chr1 | 170081517 | 170081760 |
| chr1 | 170094258 | 170094495 |
| chr1 | 170097346 | 170097496 |
| chr1 | 170111814 | 170112259 |
| chr1 | 170124693 | 170124984 |
| chr1 | 170136206 | 170136455 |
| chr1 | 170136455 | 170136921 |
| chr1 | 170145542 | 170145957 |
| chr1 | 170145957 | 170146247 |
| chr1 | 170147610 | 170148025 |
| chr1 | 170148025 | 170148442 |
| chr1 | 170164091 | 170164598 |
| chr1 | 170174195 | 170174509 |
| chr1 | 170174509 | 170174883 |
| chr1 | 170174883 | 170175490 |
| chr1 | 170188525 | 170188994 |
| chr1 | 170200503 | 170200660 |
| chr1 | 170214351 | 170214587 |
| chr1 | 170214726 | 170215169 |
| chr1 | 170215169 | 170215555 |
| chr1 | 170218521 | 170218803 |
| chr1 | 170225983 | 170226216 |
| chr1 | 170232472 | 170232760 |
| chr1 | 170232760 | 170233043 |
| chr1 | 170255255 | 170255890 |
| chr1 | 170276911 | 170277366 |

|      |           |           |
|------|-----------|-----------|
| chr1 | 170277366 | 170277700 |
| chr1 | 170292573 | 170292952 |
| chr1 | 170318378 | 170318803 |
| chr1 | 170361362 | 170361568 |
| chr1 | 170381490 | 170381812 |
| chr1 | 170390107 | 170390426 |
| chr1 | 170393075 | 170393258 |
| chr1 | 170394751 | 170394964 |
| chr1 | 170417064 | 170417270 |
| chr1 | 170438485 | 170439095 |
| chr1 | 170445537 | 170445834 |
| chr1 | 170457683 | 170458100 |
| chr1 | 170460066 | 170460568 |
| chr1 | 170469796 | 170470083 |
| chr1 | 170470083 | 170470319 |
| chr1 | 170471309 | 170471610 |
| chr1 | 170473406 | 170473900 |
| chr1 | 170479541 | 170479741 |
| chr1 | 170483653 | 170484033 |
| chr1 | 170496216 | 170496643 |
| chr1 | 170497103 | 170497348 |
| chr1 | 170530481 | 170530674 |
| chr1 | 170530882 | 170531424 |
| chr1 | 170531443 | 170531611 |
| chr1 | 170539322 | 170539472 |
| chr1 | 170539516 | 170539842 |
| chr1 | 170554528 | 170554909 |
| chr1 | 170554909 | 170555373 |
| chr1 | 170558058 | 170558254 |
| chr1 | 170563234 | 170563384 |
| chr1 | 170588959 | 170589146 |
| chr1 | 170589146 | 170589419 |
| chr1 | 170589419 | 170589728 |
| chr1 | 170589728 | 170590190 |
| chr1 | 170612234 | 170612390 |
| chr1 | 170613202 | 170613568 |
| chr1 | 170630544 | 170630804 |
| chr1 | 170632407 | 170632754 |
| chr1 | 170639513 | 170639741 |
| chr1 | 170644233 | 170644840 |
| chr1 | 170649986 | 170650225 |
| chr1 | 170664685 | 170664904 |



|      |           |           |
|------|-----------|-----------|
| chr1 | 170691289 | 170691873 |
| chr1 | 170694352 | 170694536 |
| chr1 | 170699545 | 170699741 |
| chr1 | 170699829 | 170700046 |
| chr1 | 170702332 | 170702566 |
| chr1 | 170702566 | 170702823 |
| chr1 | 170705315 | 170705530 |
| chr1 | 170729639 | 170729887 |
| chr1 | 170731679 | 170731963 |
| chr1 | 170731963 | 170732213 |
| chr1 | 170732213 | 170732492 |
| chr1 | 170753616 | 170753895 |
| chr1 | 170754725 | 170754987 |
| chr1 | 170756929 | 170757377 |
| chr1 | 170766892 | 170767336 |
| chr1 | 170768878 | 170769066 |
| chr1 | 170770736 | 170770952 |
| chr1 | 170770952 | 170771182 |
| chr1 | 170771182 | 170771427 |
| chr1 | 170771451 | 170771917 |
| chr1 | 170781077 | 170781388 |
| chr1 | 170790820 | 170790990 |
| chr1 | 170791008 | 170791391 |
| chr1 | 170795004 | 170795252 |
| chr1 | 170796014 | 170796362 |
| chr1 | 170804095 | 170804265 |
| chr1 | 170807800 | 170808263 |
| chr1 | 170817501 | 170817722 |
| chr1 | 170821393 | 170821544 |
| chr1 | 170822752 | 170822902 |
| chr1 | 170829427 | 170829710 |
| chr1 | 170829715 | 170830377 |
| chr1 | 170834838 | 170835056 |
| chr1 | 170839640 | 170839971 |
| chr1 | 170844456 | 170844704 |
| chr1 | 170853344 | 170854087 |
| chr1 | 170854155 | 170854334 |
| chr1 | 170854942 | 170855189 |
| chr1 | 170858977 | 170859188 |
| chr1 | 170863116 | 170863266 |
| chr1 | 170864897 | 170865102 |
| chr1 | 170867206 | 170867397 |

|      |           |           |
|------|-----------|-----------|
| chr1 | 170867462 | 170867681 |
| chr1 | 170867681 | 170867979 |
| chr1 | 170868512 | 170868948 |
| chr1 | 170884326 | 170884707 |
| chr1 | 170884938 | 170885275 |
| chr1 | 170885275 | 170885650 |
| chr1 | 170895357 | 170895507 |
| chr1 | 170901652 | 170901915 |
| chr1 | 170907773 | 170908178 |
| chr1 | 170912132 | 170912656 |
| chr1 | 170912771 | 170913062 |
| chr1 | 170919936 | 170920265 |
| chr1 | 170962363 | 170962666 |
| chr1 | 170978587 | 170979007 |
| chr1 | 170981718 | 170982020 |
| chr1 | 170984035 | 170984244 |
| chr1 | 170988287 | 170988546 |
| chr1 | 170992715 | 170992900 |
| chr1 | 170996796 | 170997076 |
| chr1 | 171019368 | 171019652 |
| chr1 | 171019652 | 171019945 |
| chr1 | 171019945 | 171020189 |
| chr1 | 171027944 | 171028174 |
| chr1 | 171033219 | 171033409 |
| chr1 | 171033500 | 171034101 |
| chr1 | 171036978 | 171037227 |
| chr1 | 171037935 | 171038191 |
| chr1 | 171038191 | 171038442 |
| chr1 | 171038534 | 171038740 |
| chr1 | 171044236 | 171044592 |
| chr1 | 171044592 | 171044854 |
| chr1 | 171044854 | 171045147 |
| chr1 | 171050734 | 171051072 |
| chr1 | 171063875 | 171064027 |
| chr1 | 171064107 | 171064546 |
| chr1 | 171064546 | 171064915 |
| chr1 | 171064915 | 171065232 |
| chr1 | 171065232 | 171065596 |
| chr1 | 171065610 | 171065867 |
| chr1 | 171065867 | 171066100 |
| chr1 | 171066553 | 171066915 |
| chr1 | 171070378 | 171070589 |

|      |           |           |
|------|-----------|-----------|
| chr1 | 171071768 | 171072182 |
| chr1 | 171072182 | 171072550 |
| chr1 | 171072550 | 171072870 |
| chr1 | 171072870 | 171073224 |
| chr1 | 171073252 | 171073543 |
| chr1 | 171074212 | 171074562 |
| chr1 | 171077974 | 171078264 |
| chr1 | 171079382 | 171079796 |
| chr1 | 171079796 | 171080166 |
| chr1 | 171080166 | 171080486 |
| chr1 | 171080486 | 171080845 |
| chr1 | 171080864 | 171081157 |
| chr1 | 171081760 | 171082170 |
| chr1 | 171094398 | 171094778 |
| chr1 | 171095069 | 171095227 |
| chr1 | 171095451 | 171095716 |
| chr1 | 171096183 | 171096440 |
| chr1 | 171096440 | 171096767 |
| chr1 | 171101787 | 171102127 |
| chr1 | 171102127 | 171102556 |
| chr1 | 171102556 | 171102911 |
| chr1 | 171102911 | 171103208 |
| chr1 | 171111024 | 171111330 |
| chr1 | 171111355 | 171111588 |
| chr1 | 171111588 | 171111856 |
| chr1 | 171111856 | 171112102 |
| chr1 | 171113801 | 171114312 |
| chr1 | 171118310 | 171118581 |
| chr1 | 171118587 | 171118829 |
| chr1 | 171122978 | 171123386 |
| chr1 | 171150234 | 171150484 |
| chr1 | 171150484 | 171150788 |
| chr1 | 171156769 | 171156942 |
| chr1 | 171159437 | 171159768 |
| chr1 | 171159778 | 171160013 |
| chr1 | 171184211 | 171184695 |
| chr1 | 171189537 | 171189695 |
| chr1 | 171193330 | 171193491 |
| chr1 | 171195859 | 171196128 |
| chr1 | 171196128 | 171196422 |
| chr1 | 171220872 | 171221125 |
| chr1 | 171221125 | 171221317 |

|      |           |           |
|------|-----------|-----------|
| chr1 | 171222327 | 171223072 |
| chr1 | 171238540 | 171238820 |
| chr1 | 171246809 | 171247033 |
| chr1 | 171247033 | 171247221 |
| chr1 | 171247221 | 171247515 |
| chr1 | 171247515 | 171247872 |
| chr1 | 171248022 | 171248224 |
| chr1 | 171248469 | 171248701 |
| chr1 | 171248701 | 171249119 |
| chr1 | 171256901 | 171257053 |
| chr1 | 171257053 | 171257238 |
| chr1 | 171257238 | 171257491 |
| chr1 | 171260400 | 171260741 |
| chr1 | 171262566 | 171262779 |
| chr1 | 171262779 | 171263067 |
| chr1 | 171263067 | 171263405 |
| chr1 | 171263768 | 171264009 |
| chr1 | 171269967 | 171270178 |
| chr1 | 171270178 | 171270491 |
| chr1 | 171270491 | 171270953 |
| chr1 | 171271006 | 171271178 |
| chr1 | 171277316 | 171277568 |
| chr1 | 171280663 | 171281016 |
| chr1 | 171281016 | 171281447 |
| chr1 | 171281447 | 171281700 |
| chr1 | 171281700 | 171281897 |
| chr1 | 171287443 | 171287779 |
| chr1 | 171287779 | 171288123 |
| chr1 | 171288123 | 171288348 |
| chr1 | 171292197 | 171292420 |
| chr1 | 171294271 | 171294468 |
| chr1 | 171294519 | 171295119 |
| chr1 | 171306174 | 171306497 |
| chr1 | 171311977 | 171312166 |
| chr1 | 171315121 | 171315312 |
| chr1 | 171319878 | 171320074 |
| chr1 | 171321504 | 171321696 |
| chr1 | 171321990 | 171322331 |
| chr1 | 171328654 | 171328848 |
| chr1 | 171328862 | 171329390 |
| chr1 | 171329390 | 171329708 |
| chr1 | 171329708 | 171330086 |

|      |           |           |
|------|-----------|-----------|
| chr1 | 171330086 | 171330340 |
| chr1 | 171342791 | 171343102 |
| chr1 | 171344351 | 171344633 |
| chr1 | 171345335 | 171345555 |
| chr1 | 171345555 | 171345924 |
| chr1 | 171345924 | 171346474 |
| chr1 | 171349321 | 171349543 |
| chr1 | 171353109 | 171353529 |
| chr1 | 171356038 | 171356276 |
| chr1 | 171358463 | 171358724 |
| chr1 | 171360668 | 171361025 |
| chr1 | 171361200 | 171361479 |
| chr1 | 171361486 | 171361767 |
| chr1 | 171370184 | 171370492 |
| chr1 | 171370492 | 171370755 |
| chr1 | 171374837 | 171375035 |
| chr1 | 171375035 | 171375230 |
| chr1 | 171375571 | 171376175 |
| chr1 | 171376949 | 171377121 |
| chr1 | 171377966 | 171378498 |
| chr1 | 171384456 | 171384726 |
| chr1 | 171386978 | 171387281 |
| chr1 | 171387281 | 171387502 |
| chr1 | 171390226 | 171390456 |
| chr1 | 171410944 | 171411458 |
| chr1 | 171411458 | 171411881 |
| chr1 | 171412018 | 171412317 |
| chr1 | 171424537 | 171425098 |
| chr1 | 171425098 | 171425457 |
| chr1 | 171437160 | 171437460 |
| chr1 | 171437460 | 171437674 |
| chr1 | 171437674 | 171437931 |
| chr1 | 171440382 | 171440589 |
| chr1 | 171441435 | 171441966 |
| chr1 | 171445113 | 171445381 |
| chr1 | 171453088 | 171453264 |
| chr1 | 171455018 | 171455214 |
| chr1 | 171457700 | 171457893 |
| chr1 | 171460627 | 171460819 |
| chr1 | 171461569 | 171461788 |
| chr1 | 171469757 | 171470053 |
| chr1 | 171470132 | 171470395 |

|      |           |           |
|------|-----------|-----------|
| chr1 | 171470406 | 171470613 |
| chr1 | 171470613 | 171470848 |
| chr1 | 171470913 | 171471446 |
| chr1 | 171477861 | 171478323 |
| chr1 | 171478323 | 171478608 |
| chr1 | 171478993 | 171479318 |
| chr1 | 171490465 | 171490618 |
| chr1 | 171490618 | 171490759 |
| chr1 | 171501111 | 171501563 |
| chr1 | 171501563 | 171502074 |
| chr1 | 171502074 | 171502429 |
| chr1 | 171502429 | 171502604 |
| chr1 | 171502604 | 171502769 |
| chr1 | 171502769 | 171503239 |
| chr1 | 171503330 | 171503639 |
| chr1 | 171503639 | 171503906 |
| chr1 | 171504014 | 171504168 |
| chr1 | 171515136 | 171515296 |
| chr1 | 171529688 | 171529846 |
| chr1 | 171532941 | 171533152 |
| chr1 | 171564335 | 171564669 |
| chr1 | 171566884 | 171567166 |
| chr1 | 171590622 | 171590772 |
| chr1 | 171610098 | 171610339 |
| chr1 | 171610846 | 171611105 |
| chr1 | 171815723 | 171816105 |
| chr1 | 171827760 | 171827990 |
| chr1 | 171903005 | 171903160 |
| chr1 | 171979863 | 171980373 |
| chr1 | 172000729 | 172000984 |
| chr1 | 172012079 | 172012368 |
| chr1 | 172018970 | 172019235 |
| chr1 | 172019340 | 172019524 |
| chr1 | 172026333 | 172026888 |
| chr1 | 172026923 | 172027252 |
| chr1 | 172027252 | 172027603 |
| chr1 | 172030026 | 172030225 |
| chr1 | 172046547 | 172046731 |
| chr1 | 172046955 | 172047223 |
| chr1 | 172047247 | 172047402 |
| chr1 | 172047402 | 172047540 |
| chr1 | 172064662 | 172064817 |

|      |           |           |
|------|-----------|-----------|
| chr1 | 172064847 | 172065042 |
| chr1 | 172082272 | 172082894 |
| chr1 | 172082894 | 172083411 |
| chr1 | 172099647 | 172099854 |
| chr1 | 172119765 | 172120000 |
| chr1 | 172126328 | 172126538 |
| chr1 | 172126568 | 172126850 |
| chr1 | 172126850 | 172127062 |
| chr1 | 172127062 | 172127261 |
| chr1 | 172143656 | 172143890 |
| chr1 | 172147845 | 172148283 |
| chr1 | 172148283 | 172148674 |
| chr1 | 172148674 | 172148981 |
| chr1 | 172154621 | 172154892 |
| chr1 | 172162058 | 172162330 |
| chr1 | 172169918 | 172170184 |
| chr1 | 172183115 | 172183295 |
| chr1 | 172186511 | 172186688 |
| chr1 | 172186895 | 172187065 |
| chr1 | 172188809 | 172189237 |
| chr1 | 172200204 | 172200486 |
| chr1 | 172205482 | 172205731 |
| chr1 | 172205819 | 172206087 |
| chr1 | 172206096 | 172206508 |
| chr1 | 172206508 | 172206945 |
| chr1 | 172216911 | 172217162 |
| chr1 | 172217162 | 172217486 |
| chr1 | 172220476 | 172220797 |
| chr1 | 172242344 | 172242945 |
| chr1 | 172247843 | 172248035 |
| chr1 | 172267417 | 172267571 |
| chr1 | 172280022 | 172280172 |
| chr1 | 172280405 | 172280818 |
| chr1 | 172288497 | 172288682 |
| chr1 | 172288844 | 172289220 |
| chr1 | 172289383 | 172289954 |
| chr1 | 172292953 | 172293115 |
| chr1 | 172302312 | 172302680 |
| chr1 | 172307910 | 172308385 |
| chr1 | 172309758 | 172309976 |
| chr1 | 172310176 | 172310470 |
| chr1 | 172311389 | 172311868 |

|      |           |           |
|------|-----------|-----------|
| chr1 | 172311951 | 172312494 |
| chr1 | 172324770 | 172325049 |
| chr1 | 172326167 | 172326561 |
| chr1 | 172340780 | 172340941 |
| chr1 | 172340947 | 172341236 |
| chr1 | 172341236 | 172341546 |
| chr1 | 172350382 | 172350862 |
| chr1 | 172357619 | 172357872 |
| chr1 | 172364711 | 172364963 |
| chr1 | 172368844 | 172369083 |
| chr1 | 172376037 | 172376681 |
| chr1 | 172376681 | 172377072 |
| chr1 | 172377072 | 172377362 |
| chr1 | 172390863 | 172391252 |
| chr1 | 172391252 | 172391567 |
| chr1 | 172392821 | 172393047 |
| chr1 | 172406151 | 172406340 |
| chr1 | 172409173 | 172409325 |
| chr1 | 172409574 | 172409724 |
| chr1 | 172410897 | 172411118 |
| chr1 | 172411526 | 172411817 |
| chr1 | 172411817 | 172412177 |
| chr1 | 172412177 | 172412553 |
| chr1 | 172413617 | 172413821 |
| chr1 | 172423267 | 172424025 |
| chr1 | 172428592 | 172428946 |
| chr1 | 172428946 | 172429230 |
| chr1 | 172431891 | 172432129 |
| chr1 | 172432325 | 172432507 |
| chr1 | 172436900 | 172437128 |
| chr1 | 172458100 | 172458771 |
| chr1 | 172462474 | 172462944 |
| chr1 | 172464266 | 172464585 |
| chr1 | 172475557 | 172475823 |
| chr1 | 172475950 | 172476157 |
| chr1 | 172481509 | 172481844 |
| chr1 | 172481844 | 172482091 |
| chr1 | 172482091 | 172482354 |
| chr1 | 172483405 | 172483648 |
| chr1 | 172489833 | 172490312 |
| chr1 | 172490312 | 172490809 |
| chr1 | 172499714 | 172500022 |



|      |           |           |
|------|-----------|-----------|
| chr1 | 172500022 | 172500572 |
| chr1 | 172500668 | 172500963 |
| chr1 | 172500963 | 172501526 |
| chr1 | 172501713 | 172502036 |
| chr1 | 172502036 | 172502432 |
| chr1 | 172503043 | 172503193 |
| chr1 | 172503359 | 172503649 |
| chr1 | 172503649 | 172503915 |
| chr1 | 172508916 | 172509091 |
| chr1 | 172509314 | 172509513 |
| chr1 | 172513036 | 172513227 |
| chr1 | 172513651 | 172513889 |
| chr1 | 172513905 | 172514246 |
| chr1 | 172514246 | 172514487 |
| chr1 | 172519492 | 172520126 |
| chr1 | 172520616 | 172520878 |
| chr1 | 172520901 | 172521233 |
| chr1 | 172528718 | 172529069 |
| chr1 | 172537292 | 172537631 |
| chr1 | 172546120 | 172546407 |
| chr1 | 172548540 | 172548753 |
| chr1 | 172549321 | 172549685 |
| chr1 | 172549841 | 172549991 |
| chr1 | 172550496 | 172551007 |
| chr1 | 172562686 | 172562980 |
| chr1 | 172562980 | 172563247 |
| chr1 | 172563247 | 172563548 |
| chr1 | 172563550 | 172563705 |
| chr1 | 172565315 | 172565623 |
| chr1 | 172580059 | 172580598 |
| chr1 | 172582801 | 172583047 |
| chr1 | 172585320 | 172585599 |
| chr1 | 172592462 | 172592834 |
| chr1 | 172594584 | 172594734 |
| chr1 | 172612842 | 172612994 |
| chr1 | 172619316 | 172619551 |
| chr1 | 172632445 | 172632817 |
| chr1 | 172632817 | 172633379 |
| chr1 | 172636302 | 172636590 |
| chr1 | 172664746 | 172664888 |
| chr1 | 172664888 | 172665008 |
| chr1 | 172679391 | 172679546 |

|      |           |           |
|------|-----------|-----------|
| chr1 | 172711494 | 172711693 |
| chr1 | 172960542 | 172960773 |
| chr1 | 173339671 | 173339822 |
| chr1 | 173377624 | 173377780 |
| chr1 | 173391850 | 173392077 |
| chr1 | 173398695 | 173398850 |
| chr1 | 173409056 | 173409420 |
| chr1 | 173418917 | 173419079 |
| chr1 | 173437610 | 173437900 |
| chr1 | 173448920 | 173449116 |
| chr1 | 173456433 | 173456668 |
| chr1 | 173538018 | 173538317 |
| chr1 | 173582823 | 173583148 |
| chr1 | 173591385 | 173591633 |
| chr1 | 173628439 | 173628681 |
| chr1 | 173630546 | 173630961 |
| chr1 | 173723638 | 173723980 |
| chr1 | 173733276 | 173733574 |
| chr1 | 173737048 | 173737259 |
| chr1 | 173766617 | 173767282 |
| chr1 | 173767282 | 173767778 |
| chr1 | 173776465 | 173776827 |
| chr1 | 173802653 | 173802913 |
| chr1 | 173802913 | 173803325 |
| chr1 | 173846521 | 173846875 |
| chr1 | 173880124 | 173880674 |
| chr1 | 173912579 | 173913281 |
| chr1 | 173913281 | 173913767 |
| chr1 | 173922468 | 173923016 |
| chr1 | 173924223 | 173924418 |
| chr1 | 173942375 | 173943022 |
| chr1 | 173955066 | 173955432 |
| chr1 | 173961301 | 173961771 |
| chr1 | 173972763 | 173972975 |
| chr1 | 173973108 | 173973528 |
| chr1 | 173982519 | 173982861 |
| chr1 | 173982861 | 173983251 |
| chr1 | 173983389 | 173983609 |
| chr1 | 174031417 | 174031819 |
| chr1 | 174031819 | 174032262 |
| chr1 | 174032264 | 174032514 |
| chr1 | 174036244 | 174036407 |

|      |           |           |
|------|-----------|-----------|
| chr1 | 174037084 | 174037435 |
| chr1 | 174040913 | 174041349 |
| chr1 | 174043538 | 174043743 |
| chr1 | 174043807 | 174044031 |
| chr1 | 174048854 | 174049333 |
| chr1 | 174052985 | 174053447 |
| chr1 | 174376580 | 174376819 |
| chr1 | 174383313 | 174383537 |
| chr1 | 174408135 | 174408319 |
| chr1 | 174456731 | 174456911 |
| chr1 | 174463395 | 174463610 |
| chr1 | 174469820 | 174470044 |
| chr1 | 174501745 | 174501952 |
| chr1 | 174503378 | 174503665 |
| chr1 | 174595132 | 174595289 |
| chr1 | 174623202 | 174623406 |
| chr1 | 174640875 | 174641465 |
| chr1 | 174654353 | 174654633 |
| chr1 | 174654633 | 174654958 |
| chr1 | 174659426 | 174659796 |
| chr1 | 174659796 | 174660089 |
| chr1 | 174677294 | 174677444 |
| chr1 | 174754772 | 174754985 |
| chr1 | 174826188 | 174826395 |
| chr1 | 174826589 | 174826943 |
| chr1 | 174869444 | 174869622 |
| chr1 | 174875250 | 174875441 |
| chr1 | 174918567 | 174918762 |
| chr1 | 174950221 | 174950467 |
| chr1 | 175041493 | 175041738 |
| chr1 | 175239713 | 175239888 |
| chr1 | 175240084 | 175240346 |
| chr1 | 175290178 | 175290336 |
| chr1 | 175427839 | 175428294 |
| chr1 | 175428294 | 175428864 |
| chr1 | 175453983 | 175454566 |
| chr1 | 175459184 | 175459404 |
| chr1 | 175462471 | 175462639 |
| chr1 | 175471537 | 175471732 |
| chr1 | 175491935 | 175492244 |
| chr1 | 175492244 | 175492470 |
| chr1 | 175492470 | 175492985 |

|      |           |           |
|------|-----------|-----------|
| chr1 | 175532383 | 175532628 |
| chr1 | 175586779 | 175587145 |
| chr1 | 175625031 | 175625507 |
| chr1 | 175625507 | 175625964 |
| chr1 | 175626050 | 175626301 |
| chr1 | 175640351 | 175640571 |
| chr1 | 175652569 | 175652772 |
| chr1 | 175669123 | 175669315 |
| chr1 | 175670045 | 175670364 |
| chr1 | 175692003 | 175692606 |
| chr1 | 175692606 | 175693360 |
| chr1 | 175699822 | 175700141 |
| chr1 | 175700230 | 175700770 |
| chr1 | 175725836 | 175726159 |
| chr1 | 175851467 | 175851784 |
| chr1 | 175880402 | 175880654 |
| chr1 | 175880654 | 175880904 |
| chr1 | 175880904 | 175881110 |
| chr1 | 175881110 | 175881306 |
| chr1 | 175881593 | 175881781 |
| chr1 | 175883533 | 175883703 |
| chr1 | 175923916 | 175924181 |
| chr1 | 175936315 | 175936506 |
| chr1 | 175936506 | 175936778 |
| chr1 | 176075538 | 176075749 |
| chr1 | 176076931 | 176077142 |
| chr1 | 176077271 | 176077442 |
| chr1 | 176077450 | 176077603 |
| chr1 | 176080622 | 176080836 |
| chr1 | 176082403 | 176082627 |
| chr1 | 176274917 | 176275104 |
| chr1 | 176275340 | 176275553 |
| chr1 | 176660233 | 176660637 |
| chr1 | 176712469 | 176712744 |
| chr1 | 176764052 | 176764223 |
| chr1 | 176789372 | 176789596 |
| chr1 | 176797421 | 176797587 |
| chr1 | 176801087 | 176801254 |
| chr1 | 176801558 | 176801745 |
| chr1 | 176804533 | 176804824 |
| chr1 | 176806870 | 176807192 |
| chr1 | 176808231 | 176808490 |

|      |           |           |
|------|-----------|-----------|
| chr1 | 176813339 | 176813569 |
| chr1 | 176813569 | 176813895 |
| chr1 | 176813895 | 176814234 |
| chr1 | 176814234 | 176814471 |
| chr1 | 176814530 | 176815052 |
| chr1 | 176818127 | 176818513 |
| chr1 | 176818662 | 176818877 |
| chr1 | 176818877 | 176819108 |
| chr1 | 176824036 | 176824186 |
| chr1 | 176827279 | 176827529 |
| chr1 | 176827529 | 176828034 |
| chr1 | 176832123 | 176832334 |
| chr1 | 176832555 | 176833075 |
| chr1 | 176834390 | 176834540 |
| chr1 | 176834767 | 176835229 |
| chr1 | 176835526 | 176835832 |
| chr1 | 176836101 | 176836284 |
| chr1 | 176847120 | 176847416 |
| chr1 | 176847517 | 176847918 |
| chr1 | 176851459 | 176851701 |
| chr1 | 176862230 | 176862482 |
| chr1 | 176919551 | 176919829 |
| chr1 | 177008705 | 177008975 |
| chr1 | 177008975 | 177009250 |
| chr1 | 177014146 | 177014350 |
| chr1 | 177014350 | 177014532 |
| chr1 | 177014532 | 177014721 |
| chr1 | 177014721 | 177015037 |
| chr1 | 177015037 | 177015395 |
| chr1 | 177029061 | 177029325 |
| chr1 | 177040437 | 177040768 |
| chr1 | 177041949 | 177042117 |
| chr1 | 177061745 | 177061960 |
| chr1 | 177070599 | 177071225 |
| chr1 | 177126045 | 177126302 |
| chr1 | 177132895 | 177133146 |
| chr1 | 177135382 | 177135623 |
| chr1 | 177147894 | 177148044 |
| chr1 | 177158537 | 177158918 |
| chr1 | 177188799 | 177189093 |
| chr1 | 177248757 | 177248947 |
| chr1 | 177257184 | 177257710 |

|      |           |           |
|------|-----------|-----------|
| chr1 | 177257714 | 177257969 |
| chr1 | 177258015 | 177258291 |
| chr1 | 177258291 | 177258520 |
| chr1 | 177258520 | 177258763 |
| chr1 | 177258763 | 177259221 |
| chr1 | 177292707 | 177293385 |
| chr1 | 177293385 | 177293616 |
| chr1 | 177321793 | 177322266 |
| chr1 | 177322266 | 177322558 |
| chr1 | 177322728 | 177322938 |
| chr1 | 177322938 | 177323192 |
| chr1 | 177336461 | 177336807 |
| chr1 | 177337206 | 177337458 |
| chr1 | 177337580 | 177337823 |
| chr1 | 177338724 | 177339136 |
| chr1 | 177352937 | 177353116 |
| chr1 | 177382927 | 177383078 |
| chr1 | 177386038 | 177386275 |
| chr1 | 177406872 | 177407090 |
| chr1 | 177441469 | 177441767 |
| chr1 | 177441767 | 177441996 |
| chr1 | 177441996 | 177442395 |
| chr1 | 177442523 | 177442769 |
| chr1 | 177443233 | 177443499 |
| chr1 | 177453895 | 177454280 |
| chr1 | 177470081 | 177470779 |
| chr1 | 177478983 | 177479349 |
| chr1 | 177479349 | 177479907 |
| chr1 | 177483859 | 177484009 |
| chr1 | 177504064 | 177504214 |
| chr1 | 177504332 | 177504665 |
| chr1 | 177555477 | 177555801 |
| chr1 | 177571021 | 177571315 |
| chr1 | 177623222 | 177623811 |
| chr1 | 177623941 | 177624091 |
| chr1 | 177634037 | 177634192 |
| chr1 | 177634231 | 177634553 |
| chr1 | 177634553 | 177634783 |
| chr1 | 177642679 | 177642950 |
| chr1 | 177644321 | 177644539 |
| chr1 | 177648646 | 177649562 |
| chr1 | 177653318 | 177653552 |

|      |           |           |
|------|-----------|-----------|
| chr1 | 177659981 | 177660260 |
| chr1 | 177676607 | 177677298 |
| chr1 | 177679676 | 177679845 |
| chr1 | 177686213 | 177686486 |
| chr1 | 177697054 | 177697289 |
| chr1 | 177702518 | 177702728 |
| chr1 | 177702908 | 177703393 |
| chr1 | 177703393 | 177703870 |
| chr1 | 177704315 | 177704476 |
| chr1 | 177708549 | 177709138 |
| chr1 | 177709901 | 177710206 |
| chr1 | 177711360 | 177711731 |
| chr1 | 177714174 | 177714453 |
| chr1 | 177719017 | 177719671 |
| chr1 | 177729218 | 177729467 |
| chr1 | 177730246 | 177730477 |
| chr1 | 177737664 | 177737943 |
| chr1 | 177742076 | 177742461 |
| chr1 | 177742461 | 177742701 |
| chr1 | 177744672 | 177744993 |
| chr1 | 177748075 | 177748731 |
| chr1 | 177768380 | 177768551 |
| chr1 | 177772415 | 177772664 |
| chr1 | 177795888 | 177796442 |
| chr1 | 177796442 | 177796951 |
| chr1 | 177808610 | 177808805 |
| chr1 | 177982998 | 177983285 |
| chr1 | 177983285 | 177983616 |
| chr1 | 177983616 | 177984154 |
| chr1 | 178064821 | 178064972 |
| chr1 | 178072877 | 178073081 |
| chr1 | 178146593 | 178146749 |
| chr1 | 178187249 | 178187714 |
| chr1 | 178187714 | 178188387 |
| chr1 | 178217199 | 178217581 |
| chr1 | 178218270 | 178218864 |
| chr1 | 178224824 | 178225153 |
| chr1 | 178242136 | 178242415 |
| chr1 | 178276055 | 178276331 |
| chr1 | 178276331 | 178276593 |
| chr1 | 178276593 | 178276831 |
| chr1 | 178281706 | 178281899 |

|      |           |           |
|------|-----------|-----------|
| chr1 | 178291521 | 178291780 |
| chr1 | 178291780 | 178292066 |
| chr1 | 178298062 | 178298261 |
| chr1 | 178301267 | 178301603 |
| chr1 | 178301819 | 178302111 |
| chr1 | 178302445 | 178302626 |
| chr1 | 178303494 | 178303699 |
| chr1 | 178318126 | 178318371 |
| chr1 | 178318371 | 178318634 |
| chr1 | 178318634 | 178318944 |
| chr1 | 178318944 | 178319365 |
| chr1 | 178319396 | 178319635 |
| chr1 | 178321431 | 178321583 |
| chr1 | 178321948 | 178322339 |
| chr1 | 178330130 | 178330379 |
| chr1 | 178336296 | 178336720 |
| chr1 | 178336720 | 178336917 |
| chr1 | 178336917 | 178337204 |
| chr1 | 178337204 | 178337588 |
| chr1 | 178337588 | 178338078 |
| chr1 | 178344063 | 178344421 |
| chr1 | 178344421 | 178344744 |
| chr1 | 178368701 | 178368915 |
| chr1 | 178368915 | 178369263 |
| chr1 | 178369341 | 178369623 |
| chr1 | 178375435 | 178375655 |
| chr1 | 178376165 | 178376420 |
| chr1 | 178395553 | 178395791 |
| chr1 | 178396411 | 178396744 |
| chr1 | 178405373 | 178405888 |
| chr1 | 178405918 | 178406283 |
| chr1 | 178406283 | 178407064 |
| chr1 | 178413470 | 178413826 |
| chr1 | 178415161 | 178415426 |
| chr1 | 178426851 | 178427048 |
| chr1 | 178449195 | 178449513 |
| chr1 | 178463588 | 178464105 |
| chr1 | 178492185 | 178492415 |
| chr1 | 178492497 | 178492841 |
| chr1 | 178492841 | 178493113 |
| chr1 | 178495479 | 178495700 |
| chr1 | 178515940 | 178516134 |



|      |           |           |
|------|-----------|-----------|
| chr1 | 178527175 | 178527418 |
| chr1 | 178527418 | 178527626 |
| chr1 | 178527626 | 178527834 |
| chr1 | 178527870 | 178528039 |
| chr1 | 178528039 | 178528449 |
| chr1 | 178528451 | 178528810 |
| chr1 | 178528810 | 178529108 |
| chr1 | 178529108 | 178529312 |
| chr1 | 178530336 | 178530575 |
| chr1 | 178530575 | 178531003 |
| chr1 | 178538959 | 178539234 |
| chr1 | 178543085 | 178543471 |
| chr1 | 178544604 | 178544971 |
| chr1 | 178590310 | 178590486 |
| chr1 | 178600852 | 178601211 |
| chr1 | 178601211 | 178601474 |
| chr1 | 178641144 | 178641480 |
| chr1 | 178642903 | 178643230 |
| chr1 | 178655653 | 178655921 |
| chr1 | 178908651 | 178908836 |
| chr1 | 178911082 | 178911329 |
| chr1 | 178942707 | 178942983 |
| chr1 | 178944266 | 178944457 |
| chr1 | 178990210 | 178990503 |
| chr1 | 178999963 | 179000128 |
| chr1 | 179041823 | 179042370 |
| chr1 | 179042370 | 179042840 |
| chr1 | 179045919 | 179046233 |
| chr1 | 179047975 | 179048256 |
| chr1 | 179048256 | 179048604 |
| chr1 | 179053954 | 179054332 |
| chr1 | 179054420 | 179054742 |
| chr1 | 179072427 | 179072711 |
| chr1 | 179091331 | 179091635 |
| chr1 | 179091649 | 179091804 |
| chr1 | 179131183 | 179131725 |
| chr1 | 179136540 | 179137363 |
| chr1 | 179142225 | 179142513 |
| chr1 | 179180681 | 179180946 |
| chr1 | 179181481 | 179181954 |
| chr1 | 179183053 | 179183205 |
| chr1 | 179232083 | 179232346 |

|      |           |           |
|------|-----------|-----------|
| chr1 | 179236566 | 179236814 |
| chr1 | 179250485 | 179250698 |
| chr1 | 179256561 | 179256713 |
| chr1 | 179324207 | 179324680 |
| chr1 | 179333822 | 179334056 |
| chr1 | 179360641 | 179360835 |
| chr1 | 179454691 | 179454963 |
| chr1 | 179476592 | 179476799 |
| chr1 | 179477138 | 179477618 |
| chr1 | 179477618 | 179478018 |
| chr1 | 179506505 | 179506889 |
| chr1 | 179511727 | 179512380 |
| chr1 | 179516881 | 179517274 |
| chr1 | 179517274 | 179517662 |
| chr1 | 179517662 | 179517907 |
| chr1 | 179517907 | 179518193 |
| chr1 | 179545852 | 179546142 |
| chr1 | 179546142 | 179546485 |
| chr1 | 179546485 | 179547003 |
| chr1 | 179547312 | 179547502 |
| chr1 | 179552832 | 179553046 |
| chr1 | 179553635 | 179553857 |
| chr1 | 179566326 | 179566758 |
| chr1 | 179566876 | 179567226 |
| chr1 | 179568930 | 179569085 |
| chr1 | 179570514 | 179570905 |
| chr1 | 179573680 | 179574174 |
| chr1 | 179623737 | 179623987 |
| chr1 | 179624414 | 179624696 |
| chr1 | 179633420 | 179633679 |
| chr1 | 179645169 | 179645441 |
| chr1 | 179645441 | 179645713 |
| chr1 | 179645713 | 179646171 |
| chr1 | 179654163 | 179654391 |
| chr1 | 179660788 | 179661009 |
| chr1 | 179667928 | 179668447 |
| chr1 | 179668447 | 179668755 |
| chr1 | 179669046 | 179669205 |
| chr1 | 179707588 | 179707813 |
| chr1 | 179715969 | 179716119 |
| chr1 | 179734492 | 179734778 |
| chr1 | 179734924 | 179735112 |

|      |           |           |
|------|-----------|-----------|
| chr1 | 179735207 | 179735359 |
| chr1 | 179741475 | 179741639 |
| chr1 | 179743109 | 179743330 |
| chr1 | 179743330 | 179743684 |
| chr1 | 179743684 | 179744203 |
| chr1 | 179744303 | 179744489 |
| chr1 | 179750431 | 179750627 |
| chr1 | 179802905 | 179803188 |
| chr1 | 179803188 | 179803500 |
| chr1 | 179803500 | 179803780 |
| chr1 | 179803780 | 179804083 |
| chr1 | 179819720 | 179819922 |
| chr1 | 179820021 | 179820213 |
| chr1 | 179828823 | 179829328 |
| chr1 | 179835938 | 179836109 |
| chr1 | 179837096 | 179837393 |
| chr1 | 179839674 | 179839915 |
| chr1 | 179844901 | 179845389 |
| chr1 | 179847764 | 179848508 |
| chr1 | 179853502 | 179853718 |
| chr1 | 179859107 | 179859260 |
| chr1 | 179859294 | 179859535 |
| chr1 | 179862861 | 179863300 |
| chr1 | 179863300 | 179863837 |
| chr1 | 179879681 | 179879846 |
| chr1 | 179913165 | 179913816 |
| chr1 | 179913902 | 179914061 |
| chr1 | 179915015 | 179915170 |
| chr1 | 179928917 | 179929165 |
| chr1 | 179935384 | 179935621 |
| chr1 | 179944417 | 179944612 |
| chr1 | 179944786 | 179945090 |
| chr1 | 179945090 | 179945426 |
| chr1 | 179946659 | 179946972 |
| chr1 | 179958771 | 179959035 |
| chr1 | 179959059 | 179959266 |
| chr1 | 179959362 | 179959728 |
| chr1 | 179959728 | 179960128 |
| chr1 | 179960128 | 179960389 |
| chr1 | 179960389 | 179960627 |
| chr1 | 179961442 | 179961660 |
| chr1 | 179961868 | 179962124 |

|      |           |           |
|------|-----------|-----------|
| chr1 | 179969809 | 179970114 |
| chr1 | 179970114 | 179970462 |
| chr1 | 179976684 | 179976956 |
| chr1 | 179976956 | 179977199 |
| chr1 | 179984024 | 179984880 |
| chr1 | 179986234 | 179986444 |
| chr1 | 179991810 | 179992153 |
| chr1 | 180013512 | 180013762 |
| chr1 | 180014908 | 180015390 |
| chr1 | 180015390 | 180015825 |
| chr1 | 180015882 | 180016056 |
| chr1 | 180021439 | 180021648 |
| chr1 | 180021714 | 180022019 |
| chr1 | 180022024 | 180022174 |
| chr1 | 180023837 | 180024110 |
| chr1 | 180029722 | 180030209 |
| chr1 | 180043154 | 180043358 |
| chr1 | 180070079 | 180070259 |
| chr1 | 180095725 | 180095935 |
| chr1 | 180104611 | 180104926 |
| chr1 | 180116603 | 180116822 |
| chr1 | 180131533 | 180131683 |
| chr1 | 180139166 | 180139558 |
| chr1 | 180167069 | 180167275 |
| chr1 | 180167777 | 180167941 |
| chr1 | 180169532 | 180169786 |
| chr1 | 180171473 | 180171623 |
| chr1 | 180175287 | 180175462 |
| chr1 | 180178361 | 180178539 |
| chr1 | 180182024 | 180182178 |
| chr1 | 180195243 | 180195471 |
| chr1 | 180195664 | 180196332 |
| chr1 | 180200897 | 180201065 |
| chr1 | 180214753 | 180215066 |
| chr1 | 180215066 | 180215413 |
| chr1 | 180216546 | 180216696 |
| chr1 | 180225170 | 180225495 |
| chr1 | 180225884 | 180226174 |
| chr1 | 180226250 | 180226627 |
| chr1 | 180242428 | 180242678 |
| chr1 | 180242858 | 180243158 |
| chr1 | 180243582 | 180243909 |

|      |           |           |
|------|-----------|-----------|
| chr1 | 180244267 | 180244454 |
| chr1 | 180244567 | 180244784 |
| chr1 | 180250081 | 180250408 |
| chr1 | 180255583 | 180256061 |
| chr1 | 180256061 | 180256683 |
| chr1 | 180263487 | 180263657 |
| chr1 | 180265501 | 180265699 |
| chr1 | 180268451 | 180268601 |
| chr1 | 180268631 | 180269107 |
| chr1 | 180274711 | 180275113 |
| chr1 | 180279607 | 180280148 |
| chr1 | 180288861 | 180289194 |
| chr1 | 180289194 | 180289493 |
| chr1 | 180289493 | 180289769 |
| chr1 | 180301036 | 180301342 |
| chr1 | 180301342 | 180301638 |
| chr1 | 180303623 | 180303900 |
| chr1 | 180312788 | 180313349 |
| chr1 | 180313583 | 180313808 |
| chr1 | 180313852 | 180314150 |
| chr1 | 180315233 | 180315408 |
| chr1 | 180320718 | 180321094 |
| chr1 | 180321094 | 180321491 |
| chr1 | 180323406 | 180323668 |
| chr1 | 180323668 | 180323878 |
| chr1 | 180328839 | 180329029 |
| chr1 | 180329029 | 180329229 |
| chr1 | 180330323 | 180330657 |
| chr1 | 180330657 | 180330906 |
| chr1 | 180330906 | 180331139 |
| chr1 | 180331139 | 180331567 |
| chr1 | 180331574 | 180331791 |
| chr1 | 180363946 | 180364402 |
| chr1 | 180365124 | 180365478 |
| chr1 | 180365478 | 180365743 |
| chr1 | 180372270 | 180372558 |
| chr1 | 180387185 | 180387480 |
| chr1 | 180387480 | 180387886 |
| chr1 | 180389401 | 180389662 |
| chr1 | 180401712 | 180402086 |
| chr1 | 180403615 | 180404170 |
| chr1 | 180404185 | 180404363 |

|      |           |           |
|------|-----------|-----------|
| chr1 | 180407149 | 180407380 |
| chr1 | 180407437 | 180407661 |
| chr1 | 180410399 | 180410720 |
| chr1 | 180410720 | 180411001 |
| chr1 | 180411159 | 180411479 |
| chr1 | 180411479 | 180411677 |
| chr1 | 180411764 | 180412426 |
| chr1 | 180419728 | 180420167 |
| chr1 | 180420911 | 180421143 |
| chr1 | 180422189 | 180422439 |
| chr1 | 180431961 | 180432111 |
| chr1 | 180434203 | 180434502 |
| chr1 | 180434985 | 180435237 |
| chr1 | 180439250 | 180439404 |
| chr1 | 180442805 | 180443098 |
| chr1 | 180462532 | 180463004 |
| chr1 | 180463004 | 180463447 |
| chr1 | 180467993 | 180468377 |
| chr1 | 180483344 | 180483600 |
| chr1 | 180483968 | 180484318 |
| chr1 | 180507266 | 180507515 |
| chr1 | 180507538 | 180507882 |
| chr1 | 180546024 | 180546698 |
| chr1 | 180550906 | 180551071 |
| chr1 | 180557082 | 180557232 |
| chr1 | 180568578 | 180569042 |
| chr1 | 180569042 | 180569484 |
| chr1 | 180577870 | 180578221 |
| chr1 | 180578767 | 180578952 |
| chr1 | 180622074 | 180622322 |
| chr1 | 180622385 | 180622730 |
| chr1 | 180626021 | 180626533 |
| chr1 | 180627732 | 180628106 |
| chr1 | 180628106 | 180628421 |
| chr1 | 180633398 | 180633599 |
| chr1 | 180635448 | 180635756 |
| chr1 | 180640559 | 180640890 |
| chr1 | 180640890 | 180641188 |
| chr1 | 180641188 | 180641451 |
| chr1 | 180641451 | 180641798 |
| chr1 | 180641798 | 180642189 |
| chr1 | 180657831 | 180658022 |

|      |           |           |
|------|-----------|-----------|
| chr1 | 180669957 | 180670121 |
| chr1 | 180678954 | 180679166 |
| chr1 | 180696564 | 180696818 |
| chr1 | 180696827 | 180697012 |
| chr1 | 180707449 | 180707755 |
| chr1 | 180707790 | 180708190 |
| chr1 | 180715293 | 180715459 |
| chr1 | 180719326 | 180719530 |
| chr1 | 180720324 | 180720645 |
| chr1 | 180725653 | 180726181 |
| chr1 | 180726181 | 180726611 |
| chr1 | 180757919 | 180758177 |
| chr1 | 180763824 | 180764216 |
| chr1 | 180768279 | 180768526 |
| chr1 | 180768526 | 180768840 |
| chr1 | 180777576 | 180778050 |
| chr1 | 180778050 | 180778673 |
| chr1 | 180783239 | 180783604 |
| chr1 | 180783604 | 180783908 |
| chr1 | 180790428 | 180790588 |
| chr1 | 180790610 | 180790901 |
| chr1 | 180790903 | 180791079 |
| chr1 | 180792099 | 180792408 |
| chr1 | 180792877 | 180793152 |
| chr1 | 180793730 | 180793880 |
| chr1 | 180811726 | 180811940 |
| chr1 | 180812491 | 180812660 |
| chr1 | 180812969 | 180813162 |
| chr1 | 180813162 | 180813435 |
| chr1 | 180813435 | 180813696 |
| chr1 | 180813696 | 180813936 |
| chr1 | 180813936 | 180814162 |
| chr1 | 180814162 | 180814492 |
| chr1 | 180829881 | 180830107 |
| chr1 | 180838159 | 180838424 |
| chr1 | 180839172 | 180839559 |
| chr1 | 180839559 | 180839887 |
| chr1 | 180841631 | 180841836 |
| chr1 | 180848116 | 180848421 |
| chr1 | 180848558 | 180848905 |
| chr1 | 180849046 | 180849196 |
| chr1 | 180850448 | 180851020 |

|      |           |           |
|------|-----------|-----------|
| chr1 | 180851020 | 180851294 |
| chr1 | 180858686 | 180859084 |
| chr1 | 180863730 | 180863889 |
| chr1 | 180872496 | 180872716 |
| chr1 | 180873860 | 180874436 |
| chr1 | 180888350 | 180888593 |
| chr1 | 180888703 | 180888854 |
| chr1 | 180889934 | 180890124 |
| chr1 | 180903124 | 180903288 |
| chr1 | 180903801 | 180903984 |
| chr1 | 180904055 | 180904370 |
| chr1 | 180904370 | 180904683 |
| chr1 | 180904683 | 180904977 |
| chr1 | 180913824 | 180914346 |
| chr1 | 180915490 | 180915694 |
| chr1 | 180917073 | 180917427 |
| chr1 | 180930887 | 180931191 |
| chr1 | 180931191 | 180931514 |
| chr1 | 180936886 | 180937038 |
| chr1 | 180940910 | 180941112 |
| chr1 | 180942122 | 180942369 |
| chr1 | 180942369 | 180942598 |
| chr1 | 180942598 | 180942831 |
| chr1 | 180942831 | 180943264 |
| chr1 | 180943904 | 180944221 |
| chr1 | 180944588 | 180944919 |
| chr1 | 180952098 | 180952454 |
| chr1 | 180952454 | 180952828 |
| chr1 | 180952868 | 180953137 |
| chr1 | 180953744 | 180953906 |
| chr1 | 180958104 | 180958411 |
| chr1 | 180966504 | 180966998 |
| chr1 | 180968734 | 180968976 |
| chr1 | 180969942 | 180970161 |
| chr1 | 180972172 | 180972524 |
| chr1 | 180974266 | 180974480 |
| chr1 | 180974480 | 180974738 |
| chr1 | 180976394 | 180976617 |
| chr1 | 180980527 | 180980794 |
| chr1 | 180981283 | 180981650 |
| chr1 | 180981773 | 180981984 |
| chr1 | 180987613 | 180987783 |



|      |           |           |
|------|-----------|-----------|
| chr1 | 180987831 | 180988126 |
| chr1 | 180991418 | 180991706 |
| chr1 | 180991969 | 180992186 |
| chr1 | 180992273 | 180992481 |
| chr1 | 181009677 | 181010213 |
| chr1 | 181010213 | 181010561 |
| chr1 | 181016853 | 181017128 |
| chr1 | 181017220 | 181017437 |
| chr1 | 181017437 | 181017709 |
| chr1 | 181020805 | 181021127 |
| chr1 | 181022278 | 181022618 |
| chr1 | 181035058 | 181035282 |
| chr1 | 181035436 | 181035772 |
| chr1 | 181039660 | 181039886 |
| chr1 | 181045478 | 181045922 |
| chr1 | 181051092 | 181051247 |
| chr1 | 181125956 | 181126297 |
| chr1 | 181126313 | 181126463 |
| chr1 | 181126793 | 181127053 |
| chr1 | 181127145 | 181127427 |
| chr1 | 181131919 | 181132464 |
| chr1 | 181143653 | 181143865 |
| chr1 | 181143865 | 181144134 |
| chr1 | 181144134 | 181144554 |
| chr1 | 181144572 | 181144754 |
| chr1 | 181150751 | 181151051 |
| chr1 | 181151051 | 181151271 |
| chr1 | 181151271 | 181151523 |
| chr1 | 181172528 | 181172788 |
| chr1 | 181203151 | 181203482 |
| chr1 | 181203518 | 181203702 |
| chr1 | 181210586 | 181210857 |
| chr1 | 181210964 | 181211152 |
| chr1 | 181211152 | 181211335 |
| chr1 | 181211335 | 181211726 |
| chr1 | 181211726 | 181212170 |
| chr1 | 181212170 | 181212670 |
| chr1 | 181213180 | 181213459 |
| chr1 | 181230634 | 181231093 |
| chr1 | 181231093 | 181231302 |
| chr1 | 181231302 | 181231623 |
| chr1 | 181232298 | 181232603 |

|      |           |           |
|------|-----------|-----------|
| chr1 | 181232696 | 181232933 |
| chr1 | 181244100 | 181244474 |
| chr1 | 181246867 | 181247106 |
| chr1 | 181247265 | 181247627 |
| chr1 | 181255605 | 181255917 |
| chr1 | 181255917 | 181256181 |
| chr1 | 181256232 | 181256462 |
| chr1 | 181256462 | 181256667 |
| chr1 | 181256667 | 181257396 |
| chr1 | 181272781 | 181273368 |
| chr1 | 181284442 | 181284600 |
| chr1 | 181310725 | 181310935 |
| chr1 | 181331995 | 181332169 |
| chr1 | 181332686 | 181332961 |
| chr1 | 181345699 | 181345933 |
| chr1 | 181352228 | 181352829 |
| chr1 | 181352829 | 181353229 |
| chr1 | 181353601 | 181353898 |
| chr1 | 181355557 | 181355768 |
| chr1 | 181355772 | 181356078 |
| chr1 | 181371287 | 181371620 |
| chr1 | 181376715 | 181376900 |
| chr1 | 181379719 | 181380111 |
| chr1 | 181393308 | 181393531 |
| chr1 | 181393740 | 181394160 |
| chr1 | 181394936 | 181395146 |
| chr1 | 181395199 | 181395500 |
| chr1 | 181395500 | 181395763 |
| chr1 | 181401975 | 181402187 |
| chr1 | 181415062 | 181415336 |
| chr1 | 181415336 | 181415758 |
| chr1 | 181418029 | 181418205 |
| chr1 | 181425234 | 181426000 |
| chr1 | 181441941 | 181442141 |
| chr1 | 181446739 | 181447148 |
| chr1 | 181465096 | 181465305 |
| chr1 | 181472915 | 181473104 |
| chr1 | 181511418 | 181511592 |
| chr1 | 181521136 | 181521296 |
| chr1 | 181521336 | 181521691 |
| chr1 | 181521691 | 181522067 |
| chr1 | 181529481 | 181529645 |

|      |           |           |
|------|-----------|-----------|
| chr1 | 181535588 | 181535878 |
| chr1 | 181536016 | 181536166 |
| chr1 | 181540552 | 181540766 |
| chr1 | 181543731 | 181544022 |
| chr1 | 181545379 | 181545747 |
| chr1 | 181552464 | 181552804 |
| chr1 | 181552804 | 181553142 |
| chr1 | 181553142 | 181553473 |
| chr1 | 181564662 | 181564844 |
| chr1 | 181611327 | 181611502 |
| chr1 | 181615978 | 181616222 |
| chr1 | 181616222 | 181616503 |
| chr1 | 181617440 | 181617590 |
| chr1 | 181623114 | 181623621 |
| chr1 | 181623621 | 181623918 |
| chr1 | 181627279 | 181627438 |
| chr1 | 181638392 | 181638636 |
| chr1 | 181660368 | 181660547 |
| chr1 | 181689280 | 181689445 |
| chr1 | 181691781 | 181691968 |
| chr1 | 181693963 | 181694214 |
| chr1 | 181694214 | 181694499 |
| chr1 | 181718008 | 181718158 |
| chr1 | 181733525 | 181733823 |
| chr1 | 181742388 | 181742580 |
| chr1 | 181742580 | 181742901 |
| chr1 | 181742925 | 181743313 |
| chr1 | 181743313 | 181743596 |
| chr1 | 181743596 | 181743873 |
| chr1 | 181753145 | 181753429 |
| chr1 | 181758842 | 181759010 |
| chr1 | 181834560 | 181834766 |
| chr1 | 181841637 | 181842212 |
| chr1 | 181842212 | 181842797 |
| chr1 | 181842935 | 181843152 |
| chr1 | 181847990 | 181848240 |
| chr1 | 181848240 | 181848573 |
| chr1 | 181853062 | 181853395 |
| chr1 | 181853395 | 181853841 |
| chr1 | 181860467 | 181861210 |
| chr1 | 181866392 | 181866578 |
| chr1 | 181866874 | 181867026 |

|      |           |           |
|------|-----------|-----------|
| chr1 | 181868275 | 181868463 |
| chr1 | 181877135 | 181877277 |
| chr1 | 181877277 | 181877530 |
| chr1 | 181879935 | 181880085 |
| chr1 | 181880980 | 181881237 |
| chr1 | 181881495 | 181881981 |
| chr1 | 181888816 | 181889331 |
| chr1 | 181911009 | 181911195 |
| chr1 | 181911411 | 181911731 |
| chr1 | 181911824 | 181912381 |
| chr1 | 181914266 | 181914450 |
| chr1 | 181921587 | 181921745 |
| chr1 | 181921876 | 181922042 |
| chr1 | 181984725 | 181985139 |
| chr1 | 181985268 | 181985576 |
| chr1 | 181985951 | 181986105 |
| chr1 | 181997230 | 181997470 |
| chr1 | 182015699 | 182015970 |
| chr1 | 182018891 | 182019051 |
| chr1 | 182019188 | 182019346 |
| chr1 | 182019379 | 182019600 |
| chr1 | 182019600 | 182019838 |
| chr1 | 182019838 | 182020107 |
| chr1 | 182020107 | 182020399 |
| chr1 | 182020399 | 182020667 |
| chr1 | 182021679 | 182022000 |
| chr1 | 182026226 | 182026505 |
| chr1 | 182028565 | 182028715 |
| chr1 | 182057900 | 182058332 |
| chr1 | 182058332 | 182058645 |
| chr1 | 182059928 | 182060087 |
| chr1 | 182071972 | 182072188 |
| chr1 | 182072188 | 182072426 |
| chr1 | 182088271 | 182088565 |
| chr1 | 182091282 | 182091652 |
| chr1 | 182091746 | 182092298 |
| chr1 | 182095251 | 182095441 |
| chr1 | 182095441 | 182095717 |
| chr1 | 182110085 | 182110316 |
| chr1 | 182115250 | 182115562 |
| chr1 | 182115604 | 182116036 |
| chr1 | 182124496 | 182124987 |

|      |           |           |
|------|-----------|-----------|
| chr1 | 182124987 | 182125388 |
| chr1 | 182140061 | 182140261 |
| chr1 | 182140396 | 182140726 |
| chr1 | 182143452 | 182143602 |
| chr1 | 182154366 | 182154521 |
| chr1 | 182238189 | 182238572 |
| chr1 | 182254752 | 182254963 |
| chr1 | 182255341 | 182255746 |
| chr1 | 182255909 | 182256118 |
| chr1 | 182256118 | 182256361 |
| chr1 | 182256361 | 182256671 |
| chr1 | 182256683 | 182256844 |
| chr1 | 182265474 | 182265754 |
| chr1 | 182282028 | 182282405 |
| chr1 | 182282405 | 182282662 |
| chr1 | 182282662 | 182283019 |
| chr1 | 182302602 | 182302911 |
| chr1 | 182320050 | 182320200 |
| chr1 | 182340894 | 182341426 |
| chr1 | 182341426 | 182341833 |
| chr1 | 182358210 | 182358509 |
| chr1 | 182361830 | 182362241 |
| chr1 | 182368311 | 182368760 |
| chr1 | 182368785 | 182369138 |
| chr1 | 182369511 | 182369805 |
| chr1 | 182369818 | 182370202 |
| chr1 | 182371844 | 182372223 |
| chr1 | 182376244 | 182376514 |
| chr1 | 182383084 | 182383483 |
| chr1 | 182408606 | 182408871 |
| chr1 | 182408871 | 182409069 |
| chr1 | 182409069 | 182409354 |
| chr1 | 182409354 | 182409668 |
| chr1 | 182432350 | 182432587 |
| chr1 | 182439110 | 182439324 |
| chr1 | 182460099 | 182460311 |
| chr1 | 182461367 | 182461614 |
| chr1 | 182465384 | 182465641 |
| chr1 | 182465989 | 182466451 |
| chr1 | 182478970 | 182479135 |
| chr1 | 182479135 | 182479332 |
| chr1 | 182481764 | 182481931 |

|      |           |           |
|------|-----------|-----------|
| chr1 | 182489776 | 182490104 |
| chr1 | 182490104 | 182490525 |
| chr1 | 182490648 | 182490871 |
| chr1 | 182496655 | 182497133 |
| chr1 | 182499496 | 182499827 |
| chr1 | 182503592 | 182503824 |
| chr1 | 182504251 | 182504618 |
| chr1 | 182505019 | 182505169 |
| chr1 | 182506304 | 182506592 |
| chr1 | 182506661 | 182506952 |
| chr1 | 182509442 | 182509778 |
| chr1 | 182511137 | 182511294 |
| chr1 | 182511780 | 182512113 |
| chr1 | 182514963 | 182515128 |
| chr1 | 182515189 | 182515540 |
| chr1 | 182515633 | 182515783 |
| chr1 | 182516770 | 182517246 |
| chr1 | 182517246 | 182517658 |
| chr1 | 182517658 | 182517930 |
| chr1 | 182520217 | 182520607 |
| chr1 | 182522197 | 182522461 |
| chr1 | 182524376 | 182524670 |
| chr1 | 182527879 | 182528285 |
| chr1 | 182528285 | 182528581 |
| chr1 | 182528581 | 182528857 |
| chr1 | 182534972 | 182535257 |
| chr1 | 182535257 | 182535516 |
| chr1 | 182539392 | 182539629 |
| chr1 | 182540270 | 182540528 |
| chr1 | 182543117 | 182543646 |
| chr1 | 182554035 | 182554396 |
| chr1 | 182559899 | 182560109 |
| chr1 | 182560381 | 182560720 |
| chr1 | 182560720 | 182561075 |
| chr1 | 182561634 | 182561866 |
| chr1 | 182564535 | 182564702 |
| chr1 | 182564756 | 182565079 |
| chr1 | 182571224 | 182571509 |
| chr1 | 182574672 | 182574951 |
| chr1 | 182582751 | 182582993 |
| chr1 | 182592166 | 182592529 |
| chr1 | 182592529 | 182592783 |

|      |           |           |
|------|-----------|-----------|
| chr1 | 182592783 | 182593210 |
| chr1 | 182629653 | 182629976 |
| chr1 | 182639183 | 182639826 |
| chr1 | 182645503 | 182645665 |
| chr1 | 182657846 | 182658075 |
| chr1 | 182669889 | 182670053 |
| chr1 | 182670406 | 182670900 |
| chr1 | 182670900 | 182671165 |
| chr1 | 182671191 | 182671515 |
| chr1 | 182678045 | 182678311 |
| chr1 | 182678839 | 182679430 |
| chr1 | 182679615 | 182680038 |
| chr1 | 182680038 | 182680437 |
| chr1 | 182686854 | 182687151 |
| chr1 | 182687151 | 182687526 |
| chr1 | 182704910 | 182705186 |
| chr1 | 182705186 | 182705410 |
| chr1 | 182705410 | 182705637 |
| chr1 | 182725565 | 182725818 |
| chr1 | 182726905 | 182727186 |
| chr1 | 182728591 | 182728941 |
| chr1 | 182729678 | 182730014 |
| chr1 | 182735168 | 182735528 |
| chr1 | 182763629 | 182764096 |
| chr1 | 182764096 | 182764542 |
| chr1 | 182764646 | 182764969 |
| chr1 | 182767525 | 182767797 |
| chr1 | 182792560 | 182792718 |
| chr1 | 182794294 | 182794504 |
| chr1 | 182830095 | 182830288 |
| chr1 | 182839345 | 182839500 |
| chr1 | 182839635 | 182839894 |
| chr1 | 182878744 | 182879010 |
| chr1 | 182882815 | 182882999 |
| chr1 | 182908205 | 182908755 |
| chr1 | 182931030 | 182931204 |
| chr1 | 182944048 | 182944251 |
| chr1 | 182944485 | 182944977 |
| chr1 | 182944977 | 182945245 |
| chr1 | 182951203 | 182951694 |
| chr1 | 182956249 | 182956653 |
| chr1 | 182956665 | 182956897 |

|      |           |           |
|------|-----------|-----------|
| chr1 | 182957265 | 182957670 |
| chr1 | 182957670 | 182957857 |
| chr1 | 182959875 | 182960075 |
| chr1 | 182960180 | 182960412 |
| chr1 | 182982966 | 182983379 |
| chr1 | 182983604 | 182983900 |
| chr1 | 182989973 | 182990125 |
| chr1 | 182990947 | 182991419 |
| chr1 | 183052643 | 183053236 |
| chr1 | 183058490 | 183059066 |
| chr1 | 183082475 | 183082817 |
| chr1 | 183103162 | 183103548 |
| chr1 | 183103620 | 183103936 |
| chr1 | 183113453 | 183113768 |
| chr1 | 183113768 | 183114174 |
| chr1 | 183115176 | 183115404 |
| chr1 | 183123523 | 183124126 |
| chr1 | 183129209 | 183129451 |
| chr1 | 183132398 | 183132548 |
| chr1 | 183133447 | 183133631 |
| chr1 | 183138658 | 183138808 |
| chr1 | 183144494 | 183144872 |
| chr1 | 183144872 | 183145116 |
| chr1 | 183147429 | 183147657 |
| chr1 | 183152237 | 183152442 |
| chr1 | 183215790 | 183215948 |
| chr1 | 183219054 | 183219410 |
| chr1 | 183220599 | 183220953 |
| chr1 | 183221139 | 183221412 |
| chr1 | 183221412 | 183221683 |
| chr1 | 183227422 | 183228042 |
| chr1 | 183273263 | 183273450 |
| chr1 | 183296477 | 183296683 |
| chr1 | 183296683 | 183296908 |
| chr1 | 183296908 | 183297169 |
| chr1 | 183297169 | 183297446 |
| chr1 | 183297446 | 183297857 |
| chr1 | 183298204 | 183298448 |
| chr1 | 183299090 | 183299631 |
| chr1 | 183315880 | 183316085 |
| chr1 | 183320835 | 183321132 |
| chr1 | 183344793 | 183345089 |



|      |           |           |
|------|-----------|-----------|
| chr1 | 183345089 | 183345349 |
| chr1 | 183345349 | 183345641 |
| chr1 | 183345641 | 183345929 |
| chr1 | 183349868 | 183350194 |
| chr1 | 183351107 | 183351402 |
| chr1 | 183368867 | 183369131 |
| chr1 | 183369131 | 183369489 |
| chr1 | 183369489 | 183369958 |
| chr1 | 183381874 | 183382141 |
| chr1 | 183383501 | 183383727 |
| chr1 | 183388697 | 183389043 |
| chr1 | 183389043 | 183389316 |
| chr1 | 183408039 | 183408210 |
| chr1 | 183414151 | 183414355 |
| chr1 | 183419652 | 183419808 |
| chr1 | 183434835 | 183435350 |
| chr1 | 183441885 | 183442447 |
| chr1 | 183442475 | 183442668 |
| chr1 | 183516243 | 183516448 |
| chr1 | 183548578 | 183548806 |
| chr1 | 183573468 | 183574110 |
| chr1 | 183574237 | 183574583 |
| chr1 | 183584357 | 183584692 |
| chr1 | 183584867 | 183585155 |
| chr1 | 183585434 | 183585873 |
| chr1 | 183600423 | 183601017 |
| chr1 | 183607321 | 183607665 |
| chr1 | 183619467 | 183619669 |
| chr1 | 183634282 | 183634474 |
| chr1 | 183634946 | 183635165 |
| chr1 | 183658383 | 183659076 |
| chr1 | 183668972 | 183669220 |
| chr1 | 183669750 | 183670009 |
| chr1 | 183671541 | 183672077 |
| chr1 | 183674387 | 183674684 |
| chr1 | 183675015 | 183675196 |
| chr1 | 183677028 | 183677188 |
| chr1 | 183679804 | 183680391 |
| chr1 | 183680391 | 183680735 |
| chr1 | 183685447 | 183685795 |
| chr1 | 183702663 | 183702912 |
| chr1 | 183702912 | 183703291 |

|      |           |           |
|------|-----------|-----------|
| chr1 | 183744262 | 183744462 |
| chr1 | 183761647 | 183762004 |
| chr1 | 183764209 | 183764496 |
| chr1 | 183764496 | 183764849 |
| chr1 | 183766857 | 183767073 |
| chr1 | 183778290 | 183778647 |
| chr1 | 183778647 | 183778921 |
| chr1 | 183778921 | 183779281 |
| chr1 | 183788147 | 183788342 |
| chr1 | 183788514 | 183789079 |
| chr1 | 183789079 | 183789293 |
| chr1 | 183790666 | 183790857 |
| chr1 | 183803363 | 183803781 |
| chr1 | 183803781 | 183804210 |
| chr1 | 183804275 | 183804633 |
| chr1 | 183841581 | 183841824 |
| chr1 | 183864867 | 183865475 |
| chr1 | 183865475 | 183865999 |
| chr1 | 183869038 | 183869300 |
| chr1 | 183880792 | 183881389 |
| chr1 | 183905129 | 183905692 |
| chr1 | 183905692 | 183906030 |
| chr1 | 183913961 | 183914291 |
| chr1 | 183921098 | 183921673 |
| chr1 | 183921706 | 183921959 |
| chr1 | 183930327 | 183930820 |
| chr1 | 183931409 | 183931612 |
| chr1 | 183933878 | 183934263 |
| chr1 | 183942321 | 183942633 |
| chr1 | 183944856 | 183945298 |
| chr1 | 183947082 | 183947469 |
| chr1 | 183949290 | 183949464 |
| chr1 | 183963792 | 183964020 |
| chr1 | 183964020 | 183964534 |
| chr1 | 183993867 | 183994141 |
| chr1 | 183999265 | 183999495 |
| chr1 | 184014721 | 184014915 |
| chr1 | 184016381 | 184016707 |
| chr1 | 184018861 | 184019020 |
| chr1 | 184033391 | 184034099 |
| chr1 | 184034099 | 184034737 |
| chr1 | 184041729 | 184042247 |

|      |           |           |
|------|-----------|-----------|
| chr1 | 184042247 | 184042509 |
| chr1 | 184042509 | 184042667 |
| chr1 | 184042788 | 184043081 |
| chr1 | 184051283 | 184051662 |
| chr1 | 184051662 | 184052296 |
| chr1 | 184052319 | 184052592 |
| chr1 | 184057306 | 184057831 |
| chr1 | 184060486 | 184060764 |
| chr1 | 184060764 | 184060977 |
| chr1 | 184060977 | 184061169 |
| chr1 | 184061407 | 184061693 |
| chr1 | 184061693 | 184061962 |
| chr1 | 184065961 | 184066452 |
| chr1 | 184067003 | 184067229 |
| chr1 | 184068326 | 184068526 |
| chr1 | 184070443 | 184070766 |
| chr1 | 184076110 | 184076328 |
| chr1 | 184076515 | 184077273 |
| chr1 | 184081821 | 184082031 |
| chr1 | 184083238 | 184083518 |
| chr1 | 184084617 | 184084931 |
| chr1 | 184084931 | 184085341 |
| chr1 | 184106951 | 184107242 |
| chr1 | 184127424 | 184127682 |
| chr1 | 184128529 | 184128683 |
| chr1 | 184132421 | 184132651 |
| chr1 | 184138690 | 184139105 |
| chr1 | 184140270 | 184140462 |
| chr1 | 184140483 | 184141023 |
| chr1 | 184166573 | 184167355 |
| chr1 | 184171624 | 184171810 |
| chr1 | 184235691 | 184235920 |
| chr1 | 184260807 | 184261126 |
| chr1 | 184261126 | 184261751 |
| chr1 | 184261788 | 184262094 |
| chr1 | 184271302 | 184271553 |
| chr1 | 184275542 | 184276369 |
| chr1 | 184276957 | 184277412 |
| chr1 | 184289794 | 184289945 |
| chr1 | 184291246 | 184291449 |
| chr1 | 184297477 | 184297694 |
| chr1 | 184322228 | 184322471 |

|      |           |           |
|------|-----------|-----------|
| chr1 | 184353930 | 184354090 |
| chr1 | 184358038 | 184358247 |
| chr1 | 184363454 | 184363618 |
| chr1 | 184389038 | 184389377 |
| chr1 | 184395369 | 184395536 |
| chr1 | 184414096 | 184414312 |
| chr1 | 184416744 | 184416939 |
| chr1 | 184431238 | 184431621 |
| chr1 | 184435511 | 184435836 |
| chr1 | 184440961 | 184441278 |
| chr1 | 184441278 | 184441645 |
| chr1 | 184451713 | 184452083 |
| chr1 | 184455603 | 184455808 |
| chr1 | 184455848 | 184456146 |
| chr1 | 184456715 | 184457232 |
| chr1 | 184471512 | 184471667 |
| chr1 | 184478144 | 184478308 |
| chr1 | 184482177 | 184482371 |
| chr1 | 184530552 | 184531110 |
| chr1 | 184534199 | 184534415 |
| chr1 | 184534505 | 184534804 |
| chr1 | 184534804 | 184535044 |
| chr1 | 184546008 | 184546321 |
| chr1 | 184546321 | 184546676 |
| chr1 | 184576603 | 184576833 |
| chr1 | 184612704 | 184613218 |
| chr1 | 184628318 | 184628516 |
| chr1 | 184628726 | 184629004 |
| chr1 | 184629252 | 184629427 |
| chr1 | 184650852 | 184651006 |
| chr1 | 184657367 | 184657673 |
| chr1 | 184663321 | 184663567 |
| chr1 | 184674957 | 184675204 |
| chr1 | 184675373 | 184676295 |
| chr1 | 184687572 | 184687722 |
| chr1 | 184692780 | 184692995 |
| chr1 | 184695422 | 184696027 |
| chr1 | 184704706 | 184704994 |
| chr1 | 184704994 | 184705282 |
| chr1 | 184707427 | 184708066 |
| chr1 | 184713873 | 184714063 |
| chr1 | 184731678 | 184732097 |

|      |           |           |
|------|-----------|-----------|
| chr1 | 184732097 | 184732510 |
| chr1 | 184732563 | 184732829 |
| chr1 | 184732829 | 184733186 |
| chr1 | 184737927 | 184738194 |
| chr1 | 184741463 | 184741707 |
| chr1 | 184745046 | 184745270 |
| chr1 | 184762036 | 184762294 |
| chr1 | 184771629 | 184771920 |
| chr1 | 184775918 | 184776180 |
| chr1 | 184777070 | 184777479 |
| chr1 | 184778597 | 184778821 |
| chr1 | 184782128 | 184782561 |
| chr1 | 184787823 | 184788012 |
| chr1 | 184791174 | 184791423 |
| chr1 | 184792054 | 184792360 |
| chr1 | 184793201 | 184793410 |
| chr1 | 184814354 | 184814751 |
| chr1 | 184814759 | 184814951 |
| chr1 | 184814999 | 184815213 |
| chr1 | 184815213 | 184815427 |
| chr1 | 184815427 | 184815629 |
| chr1 | 184815629 | 184815746 |
| chr1 | 184824237 | 184824509 |
| chr1 | 184824509 | 184825026 |
| chr1 | 184825182 | 184825426 |
| chr1 | 184829818 | 184830085 |
| chr1 | 184844749 | 184844940 |
| chr1 | 184845221 | 184845709 |
| chr1 | 184845709 | 184846083 |
| chr1 | 184846083 | 184846416 |
| chr1 | 184852193 | 184852703 |
| chr1 | 184853307 | 184853819 |
| chr1 | 184858265 | 184858645 |
| chr1 | 184861336 | 184861848 |
| chr1 | 184861848 | 184862139 |
| chr1 | 184877434 | 184877751 |
| chr1 | 184882320 | 184882702 |
| chr1 | 184882702 | 184882934 |
| chr1 | 184882934 | 184883321 |
| chr1 | 184889478 | 184889639 |
| chr1 | 184889684 | 184890067 |
| chr1 | 184908679 | 184908830 |

|      |           |           |
|------|-----------|-----------|
| chr1 | 184911650 | 184911920 |
| chr1 | 184911920 | 184912349 |
| chr1 | 184912366 | 184912699 |
| chr1 | 184937280 | 184937453 |
| chr1 | 184963268 | 184963542 |
| chr1 | 184963558 | 184963708 |
| chr1 | 184966043 | 184966256 |
| chr1 | 184999305 | 184999455 |
| chr1 | 184999595 | 184999827 |
| chr1 | 185038156 | 185038413 |
| chr1 | 185039259 | 185039409 |
| chr1 | 185052761 | 185052921 |
| chr1 | 185096166 | 185096363 |
| chr1 | 185121067 | 185121217 |
| chr1 | 185121303 | 185121572 |
| chr1 | 185121572 | 185121903 |
| chr1 | 185145379 | 185145616 |
| chr1 | 185193477 | 185193915 |
| chr1 | 185196891 | 185197469 |
| chr1 | 185203149 | 185203576 |
| chr1 | 185203718 | 185204044 |
| chr1 | 185204044 | 185204306 |
| chr1 | 185204306 | 185204621 |
| chr1 | 185205132 | 185205379 |
| chr1 | 185209683 | 185210175 |
| chr1 | 185214756 | 185214925 |
| chr1 | 185222204 | 185222413 |
| chr1 | 185224715 | 185225017 |
| chr1 | 185229768 | 185230360 |
| chr1 | 185236643 | 185236836 |
| chr1 | 185262597 | 185262837 |
| chr1 | 185263596 | 185264218 |
| chr1 | 185274892 | 185275089 |
| chr1 | 185279801 | 185280008 |
| chr1 | 185282704 | 185282866 |
| chr1 | 185282870 | 185283233 |
| chr1 | 185289302 | 185289468 |
| chr1 | 185297760 | 185297946 |
| chr1 | 185318958 | 185319392 |
| chr1 | 185319392 | 185319736 |
| chr1 | 185319736 | 185320016 |
| chr1 | 185328602 | 185328849 |

|      |           |           |
|------|-----------|-----------|
| chr1 | 185328849 | 185329066 |
| chr1 | 185329066 | 185329264 |
| chr1 | 185329264 | 185329564 |
| chr1 | 185331953 | 185332465 |
| chr1 | 185343503 | 185343746 |
| chr1 | 185346276 | 185346521 |
| chr1 | 185362629 | 185363343 |
| chr1 | 185363343 | 185363885 |
| chr1 | 185376201 | 185376795 |
| chr1 | 185377475 | 185377777 |
| chr1 | 185455080 | 185455214 |
| chr1 | 185455214 | 185455302 |
| chr1 | 185596778 | 185597055 |
| chr1 | 185628318 | 185628784 |
| chr1 | 185681978 | 185682137 |
| chr1 | 185887041 | 185887206 |
| chr1 | 185989489 | 185989660 |
| chr1 | 186008033 | 186008217 |
| chr1 | 186013168 | 186013326 |
| chr1 | 186015832 | 186016116 |
| chr1 | 186016116 | 186016358 |
| chr1 | 186043520 | 186043906 |
| chr1 | 186084890 | 186085113 |
| chr1 | 186116704 | 186117083 |
| chr1 | 186117083 | 186117493 |
| chr1 | 186119522 | 186119721 |
| chr1 | 186182726 | 186182929 |
| chr1 | 186254567 | 186254800 |
| chr1 | 186289148 | 186289571 |
| chr1 | 186294615 | 186295100 |
| chr1 | 186307720 | 186307981 |
| chr1 | 186393062 | 186393363 |
| chr1 | 186444742 | 186445162 |
| chr1 | 186447699 | 186447981 |
| chr1 | 186448774 | 186449054 |
| chr1 | 186449054 | 186449259 |
| chr1 | 186449291 | 186449650 |
| chr1 | 186454736 | 186455027 |
| chr1 | 186460763 | 186461230 |
| chr1 | 186461491 | 186461659 |
| chr1 | 186461863 | 186462143 |
| chr1 | 186478310 | 186478610 |

|      |           |           |
|------|-----------|-----------|
| chr1 | 186478610 | 186478912 |
| chr1 | 186493688 | 186493908 |
| chr1 | 186494508 | 186494704 |
| chr1 | 186515973 | 186516331 |
| chr1 | 186516331 | 186516724 |
| chr1 | 186530217 | 186530528 |
| chr1 | 186567919 | 186568631 |
| chr1 | 186568658 | 186568902 |
| chr1 | 186580199 | 186580359 |
| chr1 | 186581041 | 186581708 |
| chr1 | 186581708 | 186582316 |
| chr1 | 186584034 | 186584277 |
| chr1 | 186586815 | 186587702 |
| chr1 | 186604158 | 186604524 |
| chr1 | 186609790 | 186610371 |
| chr1 | 186610371 | 186610699 |
| chr1 | 186656286 | 186656637 |
| chr1 | 186671867 | 186672088 |
| chr1 | 186674271 | 186674507 |
| chr1 | 186674715 | 186674916 |
| chr1 | 186675814 | 186676054 |
| chr1 | 186676054 | 186676283 |
| chr1 | 186676283 | 186676592 |
| chr1 | 186704472 | 186704747 |
| chr1 | 186705092 | 186705418 |
| chr1 | 186705418 | 186705812 |
| chr1 | 186706042 | 186706228 |
| chr1 | 186706737 | 186706941 |
| chr1 | 186718994 | 186719144 |
| chr1 | 186721960 | 186722286 |
| chr1 | 186722468 | 186722667 |
| chr1 | 186729881 | 186730269 |
| chr1 | 186730269 | 186730792 |
| chr1 | 186730792 | 186731176 |
| chr1 | 186731176 | 186731454 |
| chr1 | 186731454 | 186731886 |
| chr1 | 186731886 | 186732458 |
| chr1 | 186732458 | 186732816 |
| chr1 | 186732816 | 186732930 |
| chr1 | 186732930 | 186733140 |
| chr1 | 186748813 | 186748965 |
| chr1 | 186748972 | 186749258 |



|      |           |           |
|------|-----------|-----------|
| chr1 | 186749258 | 186749679 |
| chr1 | 186749753 | 186749967 |
| chr1 | 186834403 | 186834622 |
| chr1 | 186926262 | 186926584 |
| chr1 | 186927644 | 186927828 |
| chr1 | 186930440 | 186930899 |
| chr1 | 186934326 | 186934637 |
| chr1 | 186943787 | 186944041 |
| chr1 | 186952311 | 186952533 |
| chr1 | 186959465 | 186959625 |
| chr1 | 187012559 | 187012836 |
| chr1 | 187016121 | 187016444 |
| chr1 | 187020026 | 187020369 |
| chr1 | 187031837 | 187032094 |
| chr1 | 187053320 | 187053683 |
| chr1 | 187076211 | 187076515 |
| chr1 | 187076625 | 187076786 |
| chr1 | 187076942 | 187077243 |
| chr1 | 187078984 | 187079149 |
| chr1 | 187098278 | 187098640 |
| chr1 | 187100756 | 187100960 |
| chr1 | 187114526 | 187115091 |
| chr1 | 187121555 | 187121822 |
| chr1 | 187121863 | 187122028 |
| chr1 | 187133867 | 187134171 |
| chr1 | 187134201 | 187134558 |
| chr1 | 187134558 | 187134833 |
| chr1 | 187134833 | 187135228 |
| chr1 | 187137510 | 187137725 |
| chr1 | 187155752 | 187155916 |
| chr1 | 187171458 | 187171872 |
| chr1 | 187171872 | 187172284 |
| chr1 | 187187223 | 187187418 |
| chr1 | 187198829 | 187199036 |
| chr1 | 187199040 | 187199766 |
| chr1 | 187215140 | 187215703 |
| chr1 | 187215703 | 187216029 |
| chr1 | 187226478 | 187226725 |
| chr1 | 187226725 | 187226970 |
| chr1 | 187228481 | 187228781 |
| chr1 | 187228781 | 187229108 |
| chr1 | 187229148 | 187229305 |

|      |           |           |
|------|-----------|-----------|
| chr1 | 187235192 | 187235479 |
| chr1 | 187236332 | 187236635 |
| chr1 | 187236683 | 187237068 |
| chr1 | 187270317 | 187270662 |
| chr1 | 187276138 | 187276427 |
| chr1 | 187293714 | 187293892 |
| chr1 | 187294542 | 187294830 |
| chr1 | 187295125 | 187295405 |
| chr1 | 187303367 | 187303604 |
| chr1 | 187316601 | 187316826 |
| chr1 | 187353097 | 187353278 |
| chr1 | 187353278 | 187353521 |
| chr1 | 187353634 | 187353812 |
| chr1 | 187354485 | 187354708 |
| chr1 | 187354708 | 187354935 |
| chr1 | 187355310 | 187355473 |
| chr1 | 187355763 | 187355927 |
| chr1 | 187365428 | 187365756 |
| chr1 | 187374532 | 187374872 |
| chr1 | 187740656 | 187740850 |
| chr1 | 187799330 | 187799641 |
| chr1 | 187800691 | 187801085 |
| chr1 | 187910724 | 187911136 |
| chr1 | 187997631 | 187997872 |
| chr1 | 188871687 | 188871893 |
| chr1 | 188896058 | 188896340 |
| chr1 | 188980021 | 188980532 |
| chr1 | 188987646 | 188987808 |
| chr1 | 188988920 | 188989139 |
| chr1 | 188989565 | 188989759 |
| chr1 | 188993246 | 188993557 |
| chr1 | 189006242 | 189006606 |
| chr1 | 189006938 | 189007237 |
| chr1 | 189007237 | 189007648 |
| chr1 | 189007648 | 189008042 |
| chr1 | 189013207 | 189013535 |
| chr1 | 189027077 | 189027242 |
| chr1 | 189028361 | 189028555 |
| chr1 | 189037966 | 189038126 |
| chr1 | 189047281 | 189047520 |
| chr1 | 189054989 | 189055183 |
| chr1 | 189068849 | 189069106 |

|      |           |           |
|------|-----------|-----------|
| chr1 | 189080836 | 189081157 |
| chr1 | 189106406 | 189106605 |
| chr1 | 189119917 | 189120209 |
| chr1 | 189159582 | 189159774 |
| chr1 | 189194367 | 189195130 |
| chr1 | 189201780 | 189201942 |
| chr1 | 189214195 | 189214400 |
| chr1 | 189214977 | 189215199 |
| chr1 | 189215199 | 189215472 |
| chr1 | 189215472 | 189215760 |
| chr1 | 189216517 | 189216669 |
| chr1 | 189227599 | 189227810 |
| chr1 | 189243364 | 189243647 |
| chr1 | 189257157 | 189257372 |
| chr1 | 189353980 | 189354230 |
| chr1 | 189566514 | 189566873 |
| chr1 | 189579466 | 189579673 |
| chr1 | 189615321 | 189615618 |
| chr1 | 189628479 | 189628727 |
| chr1 | 189662019 | 189662169 |
| chr1 | 189667441 | 189667699 |
| chr1 | 189675600 | 189675797 |
| chr1 | 189687770 | 189688019 |
| chr1 | 189688019 | 189688635 |
| chr1 | 189698483 | 189698747 |
| chr1 | 189701053 | 189701349 |
| chr1 | 189703180 | 189703456 |
| chr1 | 189705350 | 189705640 |
| chr1 | 189716044 | 189716224 |
| chr1 | 189716320 | 189716859 |
| chr1 | 189719606 | 189719830 |
| chr1 | 189727288 | 189727761 |
| chr1 | 189727761 | 189728820 |
| chr1 | 189736391 | 189736544 |
| chr1 | 189742066 | 189742280 |
| chr1 | 189749961 | 189750163 |
| chr1 | 189761484 | 189762157 |
| chr1 | 189767154 | 189767450 |
| chr1 | 189773206 | 189773516 |
| chr1 | 189773516 | 189773860 |
| chr1 | 189777195 | 189777613 |
| chr1 | 189778299 | 189778729 |

|      |           |           |
|------|-----------|-----------|
| chr1 | 189784446 | 189784901 |
| chr1 | 189784901 | 189785251 |
| chr1 | 189785251 | 189785407 |
| chr1 | 189792034 | 189792286 |
| chr1 | 189792286 | 189792580 |
| chr1 | 189792580 | 189792852 |
| chr1 | 189792852 | 189793120 |
| chr1 | 189800258 | 189800514 |
| chr1 | 189811749 | 189812345 |
| chr1 | 189812697 | 189812936 |
| chr1 | 189813120 | 189813270 |
| chr1 | 189838042 | 189838368 |
| chr1 | 189860083 | 189860853 |
| chr1 | 189862036 | 189862250 |
| chr1 | 189867094 | 189867467 |
| chr1 | 189867467 | 189867897 |
| chr1 | 189868024 | 189868466 |
| chr1 | 189874986 | 189875381 |
| chr1 | 189875381 | 189875648 |
| chr1 | 189875668 | 189875935 |
| chr1 | 189883038 | 189883243 |
| chr1 | 189883846 | 189884181 |
| chr1 | 189887564 | 189887845 |
| chr1 | 189888767 | 189889129 |
| chr1 | 189895571 | 189895732 |
| chr1 | 189898786 | 189898947 |
| chr1 | 189905822 | 189906039 |
| chr1 | 189906039 | 189906270 |
| chr1 | 189908047 | 189908239 |
| chr1 | 189908239 | 189908446 |
| chr1 | 189911071 | 189911259 |
| chr1 | 189921467 | 189921626 |
| chr1 | 189921740 | 189922155 |
| chr1 | 189922155 | 189922699 |
| chr1 | 189927705 | 189927996 |
| chr1 | 189936519 | 189936789 |
| chr1 | 189936789 | 189937139 |
| chr1 | 189959728 | 189960182 |
| chr1 | 189968144 | 189968398 |
| chr1 | 189972855 | 189973090 |
| chr1 | 189973090 | 189973402 |
| chr1 | 190008829 | 190009028 |

|      |           |           |
|------|-----------|-----------|
| chr1 | 190039393 | 190039671 |
| chr1 | 190125449 | 190125630 |
| chr1 | 190170190 | 190170350 |
| chr1 | 190170391 | 190170833 |
| chr1 | 190300381 | 190300681 |
| chr1 | 190301160 | 190301333 |
| chr1 | 190301409 | 190301645 |
| chr1 | 190301744 | 190302057 |
| chr1 | 190302127 | 190302465 |
| chr1 | 190302465 | 190302840 |
| chr1 | 190303136 | 190303394 |
| chr1 | 190471834 | 190472052 |
| chr1 | 190542050 | 190542282 |
| chr1 | 190595931 | 190596339 |
| chr1 | 190596339 | 190596612 |
| chr1 | 190596612 | 190596859 |
| chr1 | 190695722 | 190695874 |
| chr1 | 190710333 | 190710525 |
| chr1 | 190745428 | 190745643 |
| chr1 | 190756014 | 190756320 |
| chr1 | 190756350 | 190756610 |
| chr1 | 190756610 | 190756840 |
| chr1 | 190770498 | 190770835 |
| chr1 | 190776793 | 190776943 |
| chr1 | 190780271 | 190780506 |
| chr1 | 190780513 | 190780740 |
| chr1 | 190780740 | 190781040 |
| chr1 | 190781042 | 190781276 |
| chr1 | 190781415 | 190781629 |
| chr1 | 190790268 | 190790444 |
| chr1 | 190797328 | 190797480 |
| chr1 | 190806792 | 190806942 |
| chr1 | 190830412 | 190830670 |
| chr1 | 190830670 | 190830944 |
| chr1 | 190831869 | 190832126 |
| chr1 | 190834675 | 190834866 |
| chr1 | 190871107 | 190871264 |
| chr1 | 190880760 | 190880919 |
| chr1 | 190881510 | 190881740 |
| chr1 | 190882926 | 190883125 |
| chr1 | 190899247 | 190899485 |
| chr1 | 190899846 | 190900200 |

|      |           |           |
|------|-----------|-----------|
| chr1 | 190901166 | 190901405 |
| chr1 | 190902641 | 190902968 |
| chr1 | 190902968 | 190903276 |
| chr1 | 190911136 | 190911310 |
| chr1 | 190911369 | 190911688 |
| chr1 | 190911688 | 190912288 |
| chr1 | 190927816 | 190928006 |
| chr1 | 190928341 | 190928649 |
| chr1 | 190928649 | 190928980 |
| chr1 | 190928980 | 190929302 |
| chr1 | 190934296 | 190934473 |
| chr1 | 190934540 | 190935226 |
| chr1 | 190944191 | 190944384 |
| chr1 | 190944397 | 190944724 |
| chr1 | 190978151 | 190978312 |
| chr1 | 190978476 | 190978677 |
| chr1 | 190978677 | 190978849 |
| chr1 | 190978849 | 190979043 |
| chr1 | 190979046 | 190979662 |
| chr1 | 190989764 | 190989969 |
| chr1 | 190998078 | 190998611 |
| chr1 | 191025136 | 191025299 |
| chr1 | 191025302 | 191025676 |
| chr1 | 191025676 | 191025992 |
| chr1 | 191025992 | 191026409 |
| chr1 | 191026409 | 191026740 |
| chr1 | 191031022 | 191031409 |
| chr1 | 191035645 | 191036039 |
| chr1 | 191050692 | 191050916 |
| chr1 | 191050916 | 191051167 |
| chr1 | 191051238 | 191051581 |
| chr1 | 191051694 | 191052122 |
| chr1 | 191052122 | 191052420 |
| chr1 | 191054924 | 191055115 |
| chr1 | 191055251 | 191055533 |
| chr1 | 191055533 | 191055776 |
| chr1 | 191057543 | 191057764 |
| chr1 | 191062595 | 191062868 |
| chr1 | 191062868 | 191063214 |
| chr1 | 191063214 | 191063515 |
| chr1 | 191065335 | 191065521 |
| chr1 | 191068502 | 191068698 |

|      |           |           |
|------|-----------|-----------|
| chr1 | 191072451 | 191072877 |
| chr1 | 191075274 | 191075650 |
| chr1 | 191075650 | 191076187 |
| chr1 | 191085024 | 191085266 |
| chr1 | 191085804 | 191086018 |
| chr1 | 191093016 | 191093185 |
| chr1 | 191093261 | 191093450 |
| chr1 | 191095119 | 191095285 |
| chr1 | 191097199 | 191097717 |
| chr1 | 191097717 | 191098165 |
| chr1 | 191098165 | 191098858 |
| chr1 | 191107039 | 191107248 |
| chr1 | 191120489 | 191120683 |
| chr1 | 191120863 | 191121169 |
| chr1 | 191123902 | 191124104 |
| chr1 | 191124203 | 191124428 |
| chr1 | 191125853 | 191126273 |
| chr1 | 191126273 | 191126558 |
| chr1 | 191131838 | 191131990 |
| chr1 | 191132473 | 191132728 |
| chr1 | 191132843 | 191133395 |
| chr1 | 191134993 | 191135192 |
| chr1 | 191135192 | 191135392 |
| chr1 | 191135470 | 191135852 |
| chr1 | 191141002 | 191141371 |
| chr1 | 191152010 | 191152232 |
| chr1 | 191152232 | 191152382 |
| chr1 | 191152461 | 191152756 |
| chr1 | 191152920 | 191153411 |
| chr1 | 191166338 | 191166778 |
| chr1 | 191166822 | 191166973 |
| chr1 | 191167154 | 191167333 |
| chr1 | 191167333 | 191167648 |
| chr1 | 191167667 | 191167822 |
| chr1 | 191167957 | 191168184 |
| chr1 | 191168214 | 191168396 |
| chr1 | 191168396 | 191168576 |
| chr1 | 191168694 | 191168988 |
| chr1 | 191169520 | 191169918 |
| chr1 | 191170088 | 191170291 |
| chr1 | 191172613 | 191172773 |
| chr1 | 191173460 | 191173640 |

|      |           |           |
|------|-----------|-----------|
| chr1 | 191173868 | 191174133 |
| chr1 | 191174958 | 191175117 |
| chr1 | 191175117 | 191175271 |
| chr1 | 191175582 | 191175902 |
| chr1 | 191182402 | 191182653 |
| chr1 | 191182950 | 191183381 |
| chr1 | 191183381 | 191183983 |
| chr1 | 191184886 | 191185246 |
| chr1 | 191186612 | 191186764 |
| chr1 | 191189902 | 191190235 |
| chr1 | 191193269 | 191193692 |
| chr1 | 191193692 | 191194114 |
| chr1 | 191194114 | 191194388 |
| chr1 | 191200110 | 191200330 |
| chr1 | 191202194 | 191202444 |
| chr1 | 191204507 | 191204834 |
| chr1 | 191204834 | 191205385 |
| chr1 | 191213591 | 191213767 |
| chr1 | 191215833 | 191216120 |
| chr1 | 191216120 | 191216447 |
| chr1 | 191216447 | 191216880 |
| chr1 | 191221883 | 191222453 |
| chr1 | 191224073 | 191224280 |
| chr1 | 191224280 | 191224620 |
| chr1 | 191224775 | 191225085 |
| chr1 | 191232838 | 191233233 |
| chr1 | 191233233 | 191233520 |
| chr1 | 191254472 | 191254798 |
| chr1 | 191265145 | 191265297 |
| chr1 | 191265626 | 191265815 |
| chr1 | 191267937 | 191268266 |
| chr1 | 191275593 | 191276055 |
| chr1 | 191277495 | 191277887 |
| chr1 | 191277887 | 191278193 |
| chr1 | 191278214 | 191278483 |
| chr1 | 191281140 | 191281580 |
| chr1 | 191288798 | 191289063 |
| chr1 | 191292293 | 191292940 |
| chr1 | 191292987 | 191293559 |
| chr1 | 191299033 | 191299543 |
| chr1 | 191299625 | 191299950 |
| chr1 | 191305677 | 191305932 |



|      |           |           |
|------|-----------|-----------|
| chr1 | 191305932 | 191306139 |
| chr1 | 191306410 | 191306624 |
| chr1 | 191312448 | 191313009 |
| chr1 | 191313285 | 191313453 |
| chr1 | 191317603 | 191317985 |
| chr1 | 191317985 | 191318299 |
| chr1 | 191325721 | 191326171 |
| chr1 | 191326171 | 191326598 |
| chr1 | 191326598 | 191326885 |
| chr1 | 191346302 | 191346476 |
| chr1 | 191350530 | 191350680 |
| chr1 | 191352127 | 191352382 |
| chr1 | 191352500 | 191352794 |
| chr1 | 191352918 | 191353076 |
| chr1 | 191353133 | 191353338 |
| chr1 | 191364574 | 191364839 |
| chr1 | 191368337 | 191368489 |
| chr1 | 191391391 | 191391671 |
| chr1 | 191391978 | 191392180 |
| chr1 | 191396498 | 191396994 |
| chr1 | 191396994 | 191397457 |
| chr1 | 191397457 | 191397883 |
| chr1 | 191404807 | 191405017 |
| chr1 | 191414396 | 191414763 |
| chr1 | 191416619 | 191416943 |
| chr1 | 191417098 | 191417432 |
| chr1 | 191417432 | 191417630 |
| chr1 | 191419631 | 191419831 |
| chr1 | 191425956 | 191426191 |
| chr1 | 191432664 | 191432953 |
| chr1 | 191435408 | 191435734 |
| chr1 | 191438587 | 191438877 |
| chr1 | 191442374 | 191442703 |
| chr1 | 191444554 | 191444803 |
| chr1 | 191445897 | 191446244 |
| chr1 | 191452993 | 191453214 |
| chr1 | 191454428 | 191454581 |
| chr1 | 191454636 | 191454921 |
| chr1 | 191468970 | 191469125 |
| chr1 | 191470388 | 191470657 |
| chr1 | 191470657 | 191471011 |
| chr1 | 191472986 | 191473204 |

|      |           |           |
|------|-----------|-----------|
| chr1 | 191479920 | 191480115 |
| chr1 | 191484599 | 191485262 |
| chr1 | 191497807 | 191498163 |
| chr1 | 191498163 | 191498695 |
| chr1 | 191498695 | 191499086 |
| chr1 | 191513297 | 191513461 |
| chr1 | 191526822 | 191527141 |
| chr1 | 191527141 | 191527628 |
| chr1 | 191528395 | 191528649 |
| chr1 | 191529565 | 191529832 |
| chr1 | 191556958 | 191557220 |
| chr1 | 191557220 | 191557530 |
| chr1 | 191559901 | 191560055 |
| chr1 | 191562944 | 191563150 |
| chr1 | 191567987 | 191568161 |
| chr1 | 191574838 | 191575197 |
| chr1 | 191575197 | 191575461 |
| chr1 | 191575461 | 191575848 |
| chr1 | 191575848 | 191576242 |
| chr1 | 191584551 | 191584773 |
| chr1 | 191592048 | 191592387 |
| chr1 | 191599350 | 191599547 |
| chr1 | 191609057 | 191609261 |
| chr1 | 191621110 | 191621355 |
| chr1 | 191622798 | 191623167 |
| chr1 | 191624333 | 191624532 |
| chr1 | 191628475 | 191628771 |
| chr1 | 191632558 | 191633016 |
| chr1 | 191640281 | 191640680 |
| chr1 | 191641585 | 191641828 |
| chr1 | 191645986 | 191646145 |
| chr1 | 191662014 | 191662264 |
| chr1 | 191662264 | 191662558 |
| chr1 | 191662995 | 191663183 |
| chr1 | 191668151 | 191668411 |
| chr1 | 191717681 | 191718114 |
| chr1 | 191718114 | 191718483 |
| chr1 | 191718483 | 191718825 |
| chr1 | 191718864 | 191719270 |
| chr1 | 191732577 | 191733210 |
| chr1 | 191756327 | 191756485 |
| chr1 | 191768459 | 191768699 |

|      |           |           |
|------|-----------|-----------|
| chr1 | 191773921 | 191774208 |
| chr1 | 191774242 | 191774420 |
| chr1 | 191784914 | 191785516 |
| chr1 | 191793055 | 191793316 |
| chr1 | 191793316 | 191793565 |
| chr1 | 191793733 | 191794274 |
| chr1 | 191801759 | 191802037 |
| chr1 | 191802086 | 191802428 |
| chr1 | 191802428 | 191802833 |
| chr1 | 191802833 | 191803153 |
| chr1 | 191803153 | 191803405 |
| chr1 | 191803405 | 191803725 |
| chr1 | 191817836 | 191818170 |
| chr1 | 191818204 | 191818354 |
| chr1 | 191821216 | 191821708 |
| chr1 | 191821708 | 191822088 |
| chr1 | 191829153 | 191829401 |
| chr1 | 191834113 | 191834341 |
| chr1 | 191834850 | 191835305 |
| chr1 | 191837719 | 191837869 |
| chr1 | 191841011 | 191841232 |
| chr1 | 191841248 | 191841415 |
| chr1 | 191854721 | 191854902 |
| chr1 | 191855547 | 191855802 |
| chr1 | 191859485 | 191859662 |
| chr1 | 191868426 | 191868751 |
| chr1 | 191875838 | 191876043 |
| chr1 | 191876859 | 191877127 |
| chr1 | 191881077 | 191881260 |
| chr1 | 191894558 | 191894761 |
| chr1 | 191906000 | 191906459 |
| chr1 | 191906459 | 191906812 |
| chr1 | 191906812 | 191907190 |
| chr1 | 191907190 | 191907502 |
| chr1 | 191907502 | 191907815 |
| chr1 | 191913797 | 191913947 |
| chr1 | 191914482 | 191915069 |
| chr1 | 191915069 | 191915296 |
| chr1 | 191917182 | 191917423 |
| chr1 | 191918285 | 191918548 |
| chr1 | 191924541 | 191924990 |
| chr1 | 191931549 | 191931701 |

|      |           |           |
|------|-----------|-----------|
| chr1 | 191933736 | 191933973 |
| chr1 | 191942006 | 191942247 |
| chr1 | 191942699 | 191942854 |
| chr1 | 191950745 | 191950984 |
| chr1 | 191963481 | 191963715 |
| chr1 | 191964255 | 191964748 |
| chr1 | 191964750 | 191964933 |
| chr1 | 191964933 | 191965128 |
| chr1 | 191965128 | 191965398 |
| chr1 | 191977230 | 191977488 |
| chr1 | 191989135 | 191989303 |
| chr1 | 191989888 | 191990404 |
| chr1 | 191995564 | 191995797 |
| chr1 | 191999010 | 191999359 |
| chr1 | 192061580 | 192061982 |
| chr1 | 192061982 | 192062236 |
| chr1 | 192067017 | 192067257 |
| chr1 | 192068300 | 192068466 |
| chr1 | 192076866 | 192077057 |
| chr1 | 192077198 | 192077686 |
| chr1 | 192092096 | 192092836 |
| chr1 | 192092950 | 192093235 |
| chr1 | 192094518 | 192094755 |
| chr1 | 192107419 | 192107655 |
| chr1 | 192116320 | 192116590 |
| chr1 | 192136510 | 192136767 |
| chr1 | 192136767 | 192137082 |
| chr1 | 192137082 | 192137441 |
| chr1 | 192137490 | 192137867 |
| chr1 | 192137867 | 192138664 |
| chr1 | 192138690 | 192138873 |
| chr1 | 192154406 | 192154677 |
| chr1 | 192188019 | 192188451 |
| chr1 | 192189174 | 192189351 |
| chr1 | 192190531 | 192191051 |
| chr1 | 192266926 | 192267203 |
| chr1 | 192307127 | 192307398 |
| chr1 | 192315726 | 192315995 |
| chr1 | 192316793 | 192317067 |
| chr1 | 192366151 | 192366577 |
| chr1 | 192406491 | 192406652 |
| chr1 | 192418823 | 192418973 |

|      |           |           |
|------|-----------|-----------|
| chr1 | 192419238 | 192419518 |
| chr1 | 192450618 | 192450789 |
| chr1 | 192453969 | 192454308 |
| chr1 | 192454512 | 192454876 |
| chr1 | 192498240 | 192498503 |
| chr1 | 192525815 | 192525989 |
| chr1 | 192540799 | 192541001 |
| chr1 | 192596583 | 192596834 |
| chr1 | 192598419 | 192598705 |
| chr1 | 192660430 | 192660590 |
| chr1 | 192670842 | 192671162 |
| chr1 | 192722246 | 192722450 |
| chr1 | 192727039 | 192727330 |
| chr1 | 192728590 | 192728769 |
| chr1 | 192745496 | 192746155 |
| chr1 | 192746155 | 192746523 |
| chr1 | 192746523 | 192746906 |
| chr1 | 192752694 | 192752993 |
| chr1 | 192754348 | 192754556 |
| chr1 | 192754656 | 192754853 |
| chr1 | 192765593 | 192765795 |
| chr1 | 192770530 | 192770861 |
| chr1 | 192770861 | 192771142 |
| chr1 | 192771142 | 192771335 |
| chr1 | 192774237 | 192774421 |
| chr1 | 192779358 | 192779557 |
| chr1 | 192781319 | 192781663 |
| chr1 | 192784426 | 192784779 |
| chr1 | 192786173 | 192786774 |
| chr1 | 192790582 | 192790761 |
| chr1 | 192794925 | 192795378 |
| chr1 | 192811473 | 192811654 |
| chr1 | 192834610 | 192834830 |
| chr1 | 192834830 | 192835022 |
| chr1 | 192854518 | 192855029 |
| chr1 | 192855029 | 192855262 |
| chr1 | 192855425 | 192855869 |
| chr1 | 192857668 | 192857985 |
| chr1 | 192858248 | 192858478 |
| chr1 | 192860370 | 192860639 |
| chr1 | 192882739 | 192883332 |
| chr1 | 192918657 | 192918842 |

|      |           |           |
|------|-----------|-----------|
| chr1 | 193024408 | 193024585 |
| chr1 | 193035404 | 193035992 |
| chr1 | 193035992 | 193036292 |
| chr1 | 193102619 | 193102954 |
| chr1 | 193102965 | 193103247 |
| chr1 | 193109990 | 193110172 |
| chr1 | 193120740 | 193120900 |
| chr1 | 193129793 | 193130095 |
| chr1 | 193130095 | 193130295 |
| chr1 | 193130295 | 193130499 |
| chr1 | 193130538 | 193130835 |
| chr1 | 193130835 | 193131184 |
| chr1 | 193149441 | 193149800 |
| chr1 | 193151031 | 193151262 |
| chr1 | 193151295 | 193151545 |
| chr1 | 193152883 | 193153229 |
| chr1 | 193153229 | 193153498 |
| chr1 | 193153718 | 193153916 |
| chr1 | 193153988 | 193154138 |
| chr1 | 193163669 | 193163971 |
| chr1 | 193164934 | 193165297 |
| chr1 | 193165543 | 193165760 |
| chr1 | 193166081 | 193166262 |
| chr1 | 193169935 | 193170281 |
| chr1 | 193172993 | 193173333 |
| chr1 | 193173333 | 193174031 |
| chr1 | 193198414 | 193198665 |
| chr1 | 193208236 | 193208507 |
| chr1 | 193213997 | 193214210 |
| chr1 | 193216024 | 193216328 |
| chr1 | 193226812 | 193227045 |
| chr1 | 193227124 | 193227426 |
| chr1 | 193227742 | 193227994 |
| chr1 | 193255654 | 193255821 |
| chr1 | 193255829 | 193256094 |
| chr1 | 193256290 | 193256477 |
| chr1 | 193269299 | 193269691 |
| chr1 | 193273326 | 193273543 |
| chr1 | 193279291 | 193279565 |
| chr1 | 193279565 | 193279871 |
| chr1 | 193279884 | 193280048 |
| chr1 | 193280636 | 193280786 |

|      |           |           |
|------|-----------|-----------|
| chr1 | 193288452 | 193288737 |
| chr1 | 193288915 | 193289142 |
| chr1 | 193298119 | 193298624 |
| chr1 | 193301232 | 193301555 |
| chr1 | 193301555 | 193301824 |
| chr1 | 193301824 | 193302264 |
| chr1 | 193311482 | 193311617 |
| chr1 | 193311617 | 193311756 |
| chr1 | 193312453 | 193312669 |
| chr1 | 193319444 | 193319704 |
| chr1 | 193319732 | 193320068 |
| chr1 | 193324316 | 193324546 |
| chr1 | 193324858 | 193325112 |
| chr1 | 193330201 | 193330592 |
| chr1 | 193332120 | 193332376 |
| chr1 | 193333091 | 193333294 |
| chr1 | 193334657 | 193334971 |
| chr1 | 193337264 | 193337449 |
| chr1 | 193342230 | 193342600 |
| chr1 | 193342612 | 193342915 |
| chr1 | 193350108 | 193350258 |
| chr1 | 193351607 | 193351867 |
| chr1 | 193362476 | 193362696 |
| chr1 | 193362696 | 193362974 |
| chr1 | 193363895 | 193364112 |
| chr1 | 193364544 | 193364885 |
| chr1 | 193376812 | 193377096 |
| chr1 | 193382561 | 193382711 |
| chr1 | 193382894 | 193383119 |
| chr1 | 193383184 | 193383336 |
| chr1 | 193385811 | 193385965 |
| chr1 | 193386193 | 193386492 |
| chr1 | 193387388 | 193387581 |
| chr1 | 193398775 | 193399120 |
| chr1 | 193399125 | 193399373 |
| chr1 | 193400132 | 193400748 |
| chr1 | 193412857 | 193413028 |
| chr1 | 193413205 | 193413684 |
| chr1 | 193413686 | 193414076 |
| chr1 | 193414076 | 193414512 |
| chr1 | 193420075 | 193420225 |
| chr1 | 193422881 | 193423218 |

|      |           |           |
|------|-----------|-----------|
| chr1 | 193440567 | 193440817 |
| chr1 | 193444317 | 193444593 |
| chr1 | 193449376 | 193449907 |
| chr1 | 193449925 | 193450112 |
| chr1 | 193451496 | 193451858 |
| chr1 | 193477212 | 193477672 |
| chr1 | 193478541 | 193478979 |
| chr1 | 193501311 | 193501663 |
| chr1 | 193503604 | 193503901 |
| chr1 | 193503976 | 193504242 |
| chr1 | 193510183 | 193510366 |
| chr1 | 193513884 | 193514256 |
| chr1 | 193543405 | 193543625 |
| chr1 | 193576043 | 193576337 |
| chr1 | 193589120 | 193589395 |
| chr1 | 193599257 | 193599480 |
| chr1 | 193632809 | 193633003 |
| chr1 | 193655375 | 193655777 |
| chr1 | 193673299 | 193673502 |
| chr1 | 193698961 | 193699196 |
| chr1 | 193703241 | 193703395 |
| chr1 | 193705281 | 193705524 |
| chr1 | 193868799 | 193869158 |
| chr1 | 193870022 | 193870249 |
| chr1 | 193870770 | 193871161 |
| chr1 | 193875344 | 193875672 |
| chr1 | 193892858 | 193893023 |
| chr1 | 193893118 | 193893395 |
| chr1 | 193905802 | 193906097 |
| chr1 | 193966729 | 193966987 |
| chr1 | 193966987 | 193967246 |
| chr1 | 193967246 | 193967547 |
| chr1 | 194026359 | 194026570 |
| chr1 | 194089868 | 194090227 |
| chr1 | 194090227 | 194090610 |
| chr1 | 194091624 | 194092003 |
| chr1 | 194095791 | 194096363 |
| chr1 | 194102162 | 194102504 |
| chr1 | 194106939 | 194107111 |
| chr1 | 194107406 | 194107575 |
| chr1 | 194107610 | 194107944 |
| chr1 | 194223111 | 194223314 |



|      |           |           |
|------|-----------|-----------|
| chr1 | 194238578 | 194238926 |
| chr1 | 194330128 | 194330319 |
| chr1 | 194372564 | 194372787 |
| chr1 | 194569325 | 194569602 |
| chr1 | 194589195 | 194589455 |
| chr1 | 194602088 | 194602468 |
| chr1 | 194608529 | 194608686 |
| chr1 | 194610620 | 194610793 |
| chr1 | 194618790 | 194619019 |
| chr1 | 194619067 | 194619280 |
| chr1 | 194619376 | 194619699 |
| chr1 | 194619699 | 194620085 |
| chr1 | 194620085 | 194620478 |
| chr1 | 194620478 | 194620802 |
| chr1 | 194626196 | 194626438 |
| chr1 | 194626995 | 194627145 |
| chr1 | 194639818 | 194640008 |
| chr1 | 194641637 | 194641822 |
| chr1 | 194651738 | 194652151 |
| chr1 | 194652151 | 194652529 |
| chr1 | 194658443 | 194659046 |
| chr1 | 194659120 | 194659277 |
| chr1 | 194659956 | 194660108 |
| chr1 | 194660363 | 194660949 |
| chr1 | 194671806 | 194672146 |
| chr1 | 194672146 | 194672394 |
| chr1 | 194672520 | 194672692 |
| chr1 | 194675712 | 194676229 |
| chr1 | 194682025 | 194682322 |
| chr1 | 194683189 | 194683415 |
| chr1 | 194687796 | 194688173 |
| chr1 | 194688173 | 194688535 |
| chr1 | 194722421 | 194722664 |
| chr1 | 194723967 | 194724137 |
| chr1 | 194724137 | 194724309 |
| chr1 | 194734924 | 194735171 |
| chr1 | 194749533 | 194749861 |
| chr1 | 194749945 | 194750113 |
| chr1 | 194750943 | 194751104 |
| chr1 | 194753259 | 194753413 |
| chr1 | 194761587 | 194761772 |
| chr1 | 194781677 | 194781923 |

|      |           |           |
|------|-----------|-----------|
| chr1 | 194805429 | 194805579 |
| chr1 | 194816930 | 194817239 |
| chr1 | 194821109 | 194821328 |
| chr1 | 194836236 | 194836520 |
| chr1 | 194837877 | 194838106 |
| chr1 | 194839305 | 194839543 |
| chr1 | 194849923 | 194850181 |
| chr1 | 194852753 | 194853205 |
| chr1 | 194878271 | 194878512 |
| chr1 | 194878512 | 194878828 |
| chr1 | 194878923 | 194879168 |
| chr1 | 194879226 | 194879676 |
| chr1 | 194879676 | 194879902 |
| chr1 | 194879964 | 194880114 |
| chr1 | 194885794 | 194885979 |
| chr1 | 194908937 | 194909338 |
| chr1 | 194922863 | 194923018 |
| chr1 | 194925050 | 194925262 |
| chr1 | 194928220 | 194928380 |
| chr1 | 194938835 | 194939055 |
| chr1 | 194941536 | 194941862 |
| chr1 | 194945506 | 194945761 |
| chr1 | 194957201 | 194957351 |
| chr1 | 194962231 | 194962534 |
| chr1 | 194962678 | 194963072 |
| chr1 | 194976090 | 194976491 |
| chr1 | 194976491 | 194976790 |
| chr1 | 194976790 | 194977144 |
| chr1 | 194978126 | 194978281 |
| chr1 | 194995244 | 194995521 |
| chr1 | 195012538 | 195012867 |
| chr1 | 195016816 | 195017068 |
| chr1 | 195017068 | 195017295 |
| chr1 | 195017295 | 195017556 |
| chr1 | 195017928 | 195018090 |
| chr1 | 195018182 | 195018430 |
| chr1 | 195033983 | 195034323 |
| chr1 | 195040513 | 195040765 |
| chr1 | 195080097 | 195080371 |
| chr1 | 195081837 | 195082058 |
| chr1 | 195084664 | 195085086 |
| chr1 | 195091781 | 195092240 |

|       |           |           |
|-------|-----------|-----------|
| chr1  | 195092240 | 195092497 |
| chr1  | 195092497 | 195092741 |
| chr1  | 195100696 | 195101240 |
| chr1  | 195130885 | 195131203 |
| chr1  | 195131203 | 195131473 |
| chr1  | 195131473 | 195131754 |
| chr1  | 195165076 | 195165292 |
| chr1  | 195169187 | 195169460 |
| chr1  | 195176571 | 195176906 |
| chr1  | 195232538 | 195232941 |
| chr1  | 195240673 | 195240848 |
| chr1  | 195241445 | 195241968 |
| chr1  | 195279163 | 195279349 |
| chr1  | 195371644 | 195372040 |
| chr10 | 3109516   | 3109695   |
| chr10 | 3109905   | 3110398   |
| chr10 | 3111314   | 3111559   |
| chr10 | 3111559   | 3111802   |
| chr10 | 3111802   | 3112137   |
| chr10 | 3112308   | 3112490   |
| chr10 | 3112562   | 3113138   |
| chr10 | 3113138   | 3113640   |
| chr10 | 3113640   | 3114008   |
| chr10 | 3114472   | 3114694   |
| chr10 | 3114824   | 3115094   |
| chr10 | 3115094   | 3115325   |
| chr10 | 3116081   | 3116529   |
| chr10 | 3116529   | 3117125   |
| chr10 | 3236709   | 3236987   |
| chr10 | 3236987   | 3237434   |
| chr10 | 3365993   | 3366216   |
| chr10 | 3366289   | 3366794   |
| chr10 | 3446627   | 3446826   |
| chr10 | 3447143   | 3447337   |
| chr10 | 3466222   | 3466596   |
| chr10 | 3466596   | 3467008   |
| chr10 | 3519103   | 3519314   |
| chr10 | 3531478   | 3531720   |
| chr10 | 3573106   | 3573437   |
| chr10 | 3740195   | 3740491   |
| chr10 | 3740491   | 3740812   |
| chr10 | 3740812   | 3741158   |

|       |         |         |
|-------|---------|---------|
| chr10 | 3741158 | 3741458 |
| chr10 | 3778557 | 3778833 |
| chr10 | 3941274 | 3941799 |
| chr10 | 3942370 | 3942749 |
| chr10 | 3943940 | 3944129 |
| chr10 | 3967274 | 3967559 |
| chr10 | 3972886 | 3973475 |
| chr10 | 3973475 | 3974139 |
| chr10 | 3978423 | 3978680 |
| chr10 | 3991382 | 3991532 |
| chr10 | 3992549 | 3992721 |
| chr10 | 3995358 | 3995532 |
| chr10 | 3996289 | 3996453 |
| chr10 | 3996517 | 3996802 |
| chr10 | 3997232 | 3997382 |
| chr10 | 4000788 | 4001026 |
| chr10 | 4002331 | 4002779 |
| chr10 | 4002779 | 4003041 |
| chr10 | 4003041 | 4003251 |
| chr10 | 4004097 | 4004335 |
| chr10 | 4026707 | 4026905 |
| chr10 | 4027015 | 4027172 |
| chr10 | 4027416 | 4027969 |
| chr10 | 4028856 | 4029215 |
| chr10 | 4037232 | 4037392 |
| chr10 | 4041508 | 4041668 |
| chr10 | 4041743 | 4042138 |
| chr10 | 4055343 | 4055653 |
| chr10 | 4063637 | 4063920 |
| chr10 | 4076921 | 4077268 |
| chr10 | 4079080 | 4079404 |
| chr10 | 4105592 | 4105761 |
| chr10 | 4105848 | 4106022 |
| chr10 | 4106144 | 4106387 |
| chr10 | 4106387 | 4106596 |
| chr10 | 4107528 | 4108304 |
| chr10 | 4111080 | 4111373 |
| chr10 | 4120751 | 4120973 |
| chr10 | 4120973 | 4121218 |
| chr10 | 4121218 | 4121713 |
| chr10 | 4123370 | 4123545 |
| chr10 | 4132053 | 4132431 |

|       |         |         |
|-------|---------|---------|
| chr10 | 4132509 | 4133182 |
| chr10 | 4144624 | 4145049 |
| chr10 | 4200405 | 4201101 |
| chr10 | 4212189 | 4212339 |
| chr10 | 4227096 | 4227331 |
| chr10 | 4230504 | 4230842 |
| chr10 | 4233265 | 4233465 |
| chr10 | 4241473 | 4241643 |
| chr10 | 4241660 | 4242008 |
| chr10 | 4245883 | 4246057 |
| chr10 | 4246463 | 4246628 |
| chr10 | 4247622 | 4247871 |
| chr10 | 4250750 | 4251018 |
| chr10 | 4257617 | 4257853 |
| chr10 | 4266173 | 4266890 |
| chr10 | 4266890 | 4267242 |
| chr10 | 4272823 | 4273010 |
| chr10 | 4273066 | 4273345 |
| chr10 | 4273959 | 4274271 |
| chr10 | 4278001 | 4278401 |
| chr10 | 4282501 | 4282721 |
| chr10 | 4313849 | 4314058 |
| chr10 | 4316836 | 4317106 |
| chr10 | 4333446 | 4333667 |
| chr10 | 4334302 | 4334788 |
| chr10 | 4341494 | 4341813 |
| chr10 | 4346579 | 4347157 |
| chr10 | 4372014 | 4372287 |
| chr10 | 4386599 | 4386865 |
| chr10 | 4386865 | 4387084 |
| chr10 | 4387084 | 4387335 |
| chr10 | 4387335 | 4387645 |
| chr10 | 4388089 | 4388284 |
| chr10 | 4388284 | 4388458 |
| chr10 | 4389025 | 4389381 |
| chr10 | 4395066 | 4395894 |
| chr10 | 4402509 | 4402674 |
| chr10 | 4404958 | 4405356 |
| chr10 | 4407287 | 4407514 |
| chr10 | 4413771 | 4414000 |
| chr10 | 4414000 | 4414285 |
| chr10 | 4432041 | 4432386 |

|       |         |         |
|-------|---------|---------|
| chr10 | 4432386 | 4432662 |
| chr10 | 4432662 | 4432963 |
| chr10 | 4433464 | 4433650 |
| chr10 | 4455894 | 4456117 |
| chr10 | 4460318 | 4460505 |
| chr10 | 4476711 | 4476874 |
| chr10 | 4480014 | 4480399 |
| chr10 | 4593913 | 4594143 |
| chr10 | 4595915 | 4596081 |
| chr10 | 4596215 | 4596569 |
| chr10 | 4598394 | 4598570 |
| chr10 | 4598570 | 4598752 |
| chr10 | 4599660 | 4599963 |
| chr10 | 4610003 | 4610327 |
| chr10 | 4610327 | 4610670 |
| chr10 | 4611449 | 4611690 |
| chr10 | 4611848 | 4612130 |
| chr10 | 4612132 | 4612292 |
| chr10 | 4612303 | 4612586 |
| chr10 | 4614354 | 4614528 |
| chr10 | 4620866 | 4621246 |
| chr10 | 4621246 | 4621672 |
| chr10 | 4635402 | 4635609 |
| chr10 | 4635801 | 4636036 |
| chr10 | 4675050 | 4675208 |
| chr10 | 4710014 | 4710255 |
| chr10 | 4712309 | 4712475 |
| chr10 | 4712537 | 4712943 |
| chr10 | 4730134 | 4730562 |
| chr10 | 4909369 | 4909608 |
| chr10 | 4983967 | 4984325 |
| chr10 | 5031215 | 5031449 |
| chr10 | 5070832 | 5071137 |
| chr10 | 5071192 | 5071488 |
| chr10 | 5083665 | 5083850 |
| chr10 | 5085533 | 5085695 |
| chr10 | 5085839 | 5086262 |
| chr10 | 5086437 | 5086651 |
| chr10 | 5089197 | 5089372 |
| chr10 | 5110818 | 5111268 |
| chr10 | 5116725 | 5117070 |
| chr10 | 5161730 | 5161890 |

|       |         |         |
|-------|---------|---------|
| chr10 | 5166723 | 5166919 |
| chr10 | 5177661 | 5177875 |
| chr10 | 5181629 | 5182221 |
| chr10 | 5182221 | 5182493 |
| chr10 | 5188843 | 5189349 |
| chr10 | 5194342 | 5194667 |
| chr10 | 5194667 | 5195182 |
| chr10 | 5199756 | 5200171 |
| chr10 | 5200820 | 5201159 |
| chr10 | 5208011 | 5208252 |
| chr10 | 5208285 | 5208810 |
| chr10 | 5209226 | 5209407 |
| chr10 | 5212666 | 5213146 |
| chr10 | 5256729 | 5257058 |
| chr10 | 5264474 | 5264685 |
| chr10 | 5266430 | 5266622 |
| chr10 | 5287598 | 5287877 |
| chr10 | 5288005 | 5288160 |
| chr10 | 5288786 | 5289023 |
| chr10 | 5289033 | 5289399 |
| chr10 | 5289399 | 5289882 |
| chr10 | 5317693 | 5317919 |
| chr10 | 5326790 | 5327028 |
| chr10 | 5340852 | 5341111 |
| chr10 | 5369683 | 5369893 |
| chr10 | 5455048 | 5455243 |
| chr10 | 5457617 | 5457823 |
| chr10 | 5470759 | 5470981 |
| chr10 | 5480149 | 5480368 |
| chr10 | 5481659 | 5481811 |
| chr10 | 5481842 | 5481999 |
| chr10 | 5483654 | 5483866 |
| chr10 | 5483866 | 5484086 |
| chr10 | 5497979 | 5498134 |
| chr10 | 5511509 | 5511673 |
| chr10 | 5515682 | 5515839 |
| chr10 | 5548617 | 5548979 |
| chr10 | 5549005 | 5549313 |
| chr10 | 5550240 | 5550502 |
| chr10 | 5550502 | 5550967 |
| chr10 | 5555025 | 5555262 |
| chr10 | 5571202 | 5571598 |

|       |         |         |
|-------|---------|---------|
| chr10 | 5576813 | 5577098 |
| chr10 | 5592757 | 5592963 |
| chr10 | 5600150 | 5600490 |
| chr10 | 5633729 | 5633998 |
| chr10 | 5634432 | 5634657 |
| chr10 | 5639196 | 5639414 |
| chr10 | 5646459 | 5646796 |
| chr10 | 5673946 | 5674384 |
| chr10 | 5674384 | 5674653 |
| chr10 | 5688639 | 5689114 |
| chr10 | 5689177 | 5689401 |
| chr10 | 5766333 | 5766500 |
| chr10 | 5787019 | 5787243 |
| chr10 | 5790751 | 5790959 |
| chr10 | 5804734 | 5804884 |
| chr10 | 5804944 | 5805744 |
| chr10 | 5805744 | 5806030 |
| chr10 | 5806030 | 5806267 |
| chr10 | 5823449 | 5823620 |
| chr10 | 5823620 | 5823832 |
| chr10 | 5823832 | 5824166 |
| chr10 | 5824166 | 5824569 |
| chr10 | 5824569 | 5824848 |
| chr10 | 5824901 | 5825178 |
| chr10 | 5829690 | 5829879 |
| chr10 | 5841452 | 5841837 |
| chr10 | 5849987 | 5850262 |
| chr10 | 5853317 | 5853649 |
| chr10 | 5868267 | 5868610 |
| chr10 | 5901830 | 5902033 |
| chr10 | 5921070 | 5921241 |
| chr10 | 5921297 | 5921449 |
| chr10 | 5922216 | 5922630 |
| chr10 | 5922630 | 5922873 |
| chr10 | 5967329 | 5967532 |
| chr10 | 5967532 | 5967760 |
| chr10 | 5967760 | 5968044 |
| chr10 | 6032474 | 6032974 |
| chr10 | 6035882 | 6036150 |
| chr10 | 6366172 | 6366562 |
| chr10 | 6630503 | 6630921 |
| chr10 | 6788766 | 6788999 |



|       |         |         |
|-------|---------|---------|
| chr10 | 6814577 | 6814800 |
| chr10 | 6820592 | 6820805 |
| chr10 | 6824642 | 6824971 |
| chr10 | 6825087 | 6825547 |
| chr10 | 6842341 | 6842570 |
| chr10 | 6844510 | 6844885 |
| chr10 | 6849894 | 6850174 |
| chr10 | 6916626 | 6916848 |
| chr10 | 6934870 | 6935106 |
| chr10 | 6953153 | 6953503 |
| chr10 | 6978113 | 6978291 |
| chr10 | 7015175 | 7015403 |
| chr10 | 7020101 | 7020404 |
| chr10 | 7025138 | 7025357 |
| chr10 | 7075773 | 7075935 |
| chr10 | 7076208 | 7076492 |
| chr10 | 7093202 | 7093352 |
| chr10 | 7100365 | 7100653 |
| chr10 | 7102514 | 7102667 |
| chr10 | 7113212 | 7113454 |
| chr10 | 7113753 | 7114153 |
| chr10 | 7118422 | 7118758 |
| chr10 | 7118758 | 7119025 |
| chr10 | 7119025 | 7119284 |
| chr10 | 7119406 | 7119566 |
| chr10 | 7120174 | 7120438 |
| chr10 | 7124846 | 7125269 |
| chr10 | 7142322 | 7142714 |
| chr10 | 7145640 | 7146161 |
| chr10 | 7152820 | 7153019 |
| chr10 | 7155275 | 7155506 |
| chr10 | 7158660 | 7159018 |
| chr10 | 7159018 | 7159539 |
| chr10 | 7170052 | 7170287 |
| chr10 | 7183439 | 7183668 |
| chr10 | 7189003 | 7189621 |
| chr10 | 7189621 | 7189911 |
| chr10 | 7189911 | 7190219 |
| chr10 | 7211035 | 7211403 |
| chr10 | 7211403 | 7211673 |
| chr10 | 7211673 | 7211880 |
| chr10 | 7211880 | 7212115 |

|       |         |         |
|-------|---------|---------|
| chr10 | 7212115 | 7212448 |
| chr10 | 7212545 | 7212895 |
| chr10 | 7289505 | 7289993 |
| chr10 | 7323389 | 7323560 |
| chr10 | 7333390 | 7333713 |
| chr10 | 7386900 | 7387052 |
| chr10 | 7388256 | 7388452 |
| chr10 | 7388722 | 7388940 |
| chr10 | 7390498 | 7390922 |
| chr10 | 7390922 | 7391130 |
| chr10 | 7391130 | 7391644 |
| chr10 | 7391680 | 7391866 |
| chr10 | 7391866 | 7392256 |
| chr10 | 7394622 | 7394814 |
| chr10 | 7462082 | 7462311 |
| chr10 | 7470114 | 7470454 |
| chr10 | 7473487 | 7474086 |
| chr10 | 7491823 | 7492091 |
| chr10 | 7492321 | 7492862 |
| chr10 | 7578169 | 7578326 |
| chr10 | 7581482 | 7581799 |
| chr10 | 7589480 | 7589928 |
| chr10 | 7589928 | 7590190 |
| chr10 | 7590190 | 7590640 |
| chr10 | 7600712 | 7600990 |
| chr10 | 7619945 | 7620182 |
| chr10 | 7662597 | 7662890 |
| chr10 | 7662890 | 7663174 |
| chr10 | 7663174 | 7663471 |
| chr10 | 7663471 | 7663816 |
| chr10 | 7667344 | 7667615 |
| chr10 | 7667615 | 7667871 |
| chr10 | 7673337 | 7673602 |
| chr10 | 7673743 | 7674012 |
| chr10 | 7680823 | 7681080 |
| chr10 | 7681080 | 7681396 |
| chr10 | 7681396 | 7681747 |
| chr10 | 7681747 | 7682024 |
| chr10 | 7695352 | 7695627 |
| chr10 | 7725575 | 7726364 |
| chr10 | 7726542 | 7726712 |
| chr10 | 7756861 | 7757045 |

|       |         |         |
|-------|---------|---------|
| chr10 | 7774313 | 7774623 |
| chr10 | 7780196 | 7780523 |
| chr10 | 7780523 | 7780821 |
| chr10 | 7780821 | 7781145 |
| chr10 | 7787324 | 7787720 |
| chr10 | 7792498 | 7792686 |
| chr10 | 7792688 | 7793004 |
| chr10 | 7793004 | 7793221 |
| chr10 | 7793221 | 7793407 |
| chr10 | 7809992 | 7810299 |
| chr10 | 7832343 | 7832519 |
| chr10 | 7832519 | 7832684 |
| chr10 | 7841599 | 7842222 |
| chr10 | 7861714 | 7861882 |
| chr10 | 7883592 | 7883845 |
| chr10 | 7890244 | 7890522 |
| chr10 | 7896953 | 7897280 |
| chr10 | 7902662 | 7902823 |
| chr10 | 7912338 | 7912529 |
| chr10 | 7923365 | 7923591 |
| chr10 | 7923591 | 7923851 |
| chr10 | 7943041 | 7943367 |
| chr10 | 7955472 | 7955982 |
| chr10 | 7955982 | 7956864 |
| chr10 | 7966229 | 7966454 |
| chr10 | 7968897 | 7969133 |
| chr10 | 7970385 | 7970650 |
| chr10 | 7976166 | 7976379 |
| chr10 | 8116876 | 8117193 |
| chr10 | 8152664 | 8152910 |
| chr10 | 8156546 | 8156698 |
| chr10 | 8174289 | 8174488 |
| chr10 | 8196360 | 8196642 |
| chr10 | 8213918 | 8214330 |
| chr10 | 8225065 | 8225266 |
| chr10 | 8240347 | 8240559 |
| chr10 | 8242455 | 8242669 |
| chr10 | 8254718 | 8254994 |
| chr10 | 8287376 | 8287603 |
| chr10 | 8292888 | 8293041 |
| chr10 | 8293041 | 8293208 |
| chr10 | 8293231 | 8293552 |

|       |         |         |
|-------|---------|---------|
| chr10 | 8323357 | 8323507 |
| chr10 | 8330969 | 8331354 |
| chr10 | 8362142 | 8362403 |
| chr10 | 8416576 | 8416779 |
| chr10 | 8431851 | 8432306 |
| chr10 | 8492076 | 8492330 |
| chr10 | 8498882 | 8499172 |
| chr10 | 8499172 | 8499428 |
| chr10 | 8499428 | 8499848 |
| chr10 | 8505447 | 8505722 |
| chr10 | 8505722 | 8506068 |
| chr10 | 8506122 | 8506364 |
| chr10 | 8506364 | 8506683 |
| chr10 | 8517809 | 8518137 |
| chr10 | 8518137 | 8518374 |
| chr10 | 8518374 | 8518682 |
| chr10 | 8518682 | 8519206 |
| chr10 | 8544488 | 8544735 |
| chr10 | 8550923 | 8551262 |
| chr10 | 8677029 | 8677254 |
| chr10 | 8679272 | 8679436 |
| chr10 | 8707843 | 8708013 |
| chr10 | 8715717 | 8715994 |
| chr10 | 8742946 | 8743200 |
| chr10 | 8746190 | 8746385 |
| chr10 | 8768592 | 8769130 |
| chr10 | 8772405 | 8772793 |
| chr10 | 8792454 | 8792741 |
| chr10 | 8795421 | 8795661 |
| chr10 | 8797906 | 8798128 |
| chr10 | 8799167 | 8799539 |
| chr10 | 8804841 | 8805052 |
| chr10 | 8805052 | 8805346 |
| chr10 | 8805371 | 8805679 |
| chr10 | 8811296 | 8811619 |
| chr10 | 8812910 | 8813120 |
| chr10 | 8829789 | 8829949 |
| chr10 | 8833829 | 8834045 |
| chr10 | 8841427 | 8841672 |
| chr10 | 8844479 | 8844689 |
| chr10 | 8866364 | 8866573 |
| chr10 | 8868188 | 8868401 |

|       |         |         |
|-------|---------|---------|
| chr10 | 8870213 | 8870802 |
| chr10 | 8874765 | 8874957 |
| chr10 | 8875227 | 8875438 |
| chr10 | 8885639 | 8886214 |
| chr10 | 8886214 | 8886727 |
| chr10 | 8890097 | 8890367 |
| chr10 | 8890545 | 8890959 |
| chr10 | 8895164 | 8895361 |
| chr10 | 8898922 | 8899162 |
| chr10 | 8899162 | 8899439 |
| chr10 | 8899439 | 8899685 |
| chr10 | 8969565 | 8969934 |
| chr10 | 8973995 | 8974292 |
| chr10 | 8990549 | 8990787 |
| chr10 | 8995168 | 8995434 |
| chr10 | 9012878 | 9013114 |
| chr10 | 9014486 | 9014646 |
| chr10 | 9027233 | 9027449 |
| chr10 | 9027449 | 9027678 |
| chr10 | 9175061 | 9175331 |
| chr10 | 9226192 | 9226434 |
| chr10 | 9239443 | 9239837 |
| chr10 | 9239837 | 9240394 |
| chr10 | 9249727 | 9249963 |
| chr10 | 9258760 | 9259026 |
| chr10 | 9300028 | 9300178 |
| chr10 | 9312406 | 9312662 |
| chr10 | 9404257 | 9404442 |
| chr10 | 9496675 | 9497523 |
| chr10 | 9503424 | 9503822 |
| chr10 | 9503822 | 9504156 |
| chr10 | 9504340 | 9504621 |
| chr10 | 9506572 | 9506730 |
| chr10 | 9523079 | 9523281 |
| chr10 | 9528141 | 9528445 |
| chr10 | 9529002 | 9529178 |
| chr10 | 9529293 | 9530062 |
| chr10 | 9531047 | 9531227 |
| chr10 | 9544131 | 9544330 |
| chr10 | 9574255 | 9574519 |
| chr10 | 9575623 | 9575939 |
| chr10 | 9581334 | 9581506 |

|       |          |          |
|-------|----------|----------|
| chr10 | 9594713  | 9595315  |
| chr10 | 9596376  | 9596532  |
| chr10 | 9597047  | 9597248  |
| chr10 | 9597248  | 9597455  |
| chr10 | 9603393  | 9603632  |
| chr10 | 9617633  | 9617906  |
| chr10 | 9637894  | 9638055  |
| chr10 | 9638061  | 9638348  |
| chr10 | 9640126  | 9640598  |
| chr10 | 9640598  | 9641055  |
| chr10 | 9646440  | 9646621  |
| chr10 | 9674413  | 9675015  |
| chr10 | 9675015  | 9675527  |
| chr10 | 9675527  | 9675971  |
| chr10 | 9676996  | 9677270  |
| chr10 | 9791098  | 9791248  |
| chr10 | 9801490  | 9801776  |
| chr10 | 9803584  | 9803834  |
| chr10 | 9808090  | 9808348  |
| chr10 | 9854356  | 9854527  |
| chr10 | 9880396  | 9880697  |
| chr10 | 9881884  | 9882248  |
| chr10 | 9883084  | 9883469  |
| chr10 | 9900379  | 9900775  |
| chr10 | 9900775  | 9901115  |
| chr10 | 9901115  | 9901491  |
| chr10 | 9901491  | 9901913  |
| chr10 | 9901913  | 9902290  |
| chr10 | 10059116 | 10059673 |
| chr10 | 10093825 | 10094149 |
| chr10 | 10224675 | 10224896 |
| chr10 | 10252194 | 10252455 |
| chr10 | 10253090 | 10253376 |
| chr10 | 10307334 | 10307814 |
| chr10 | 10321119 | 10321445 |
| chr10 | 10321481 | 10321676 |
| chr10 | 10325669 | 10325831 |
| chr10 | 10335239 | 10335431 |
| chr10 | 10335431 | 10335631 |
| chr10 | 10343978 | 10344342 |
| chr10 | 10355621 | 10355886 |
| chr10 | 10355927 | 10356078 |

|       |          |          |
|-------|----------|----------|
| chr10 | 10382714 | 10382941 |
| chr10 | 10408229 | 10408481 |
| chr10 | 10477536 | 10477694 |
| chr10 | 10544385 | 10544539 |
| chr10 | 10549608 | 10549787 |
| chr10 | 10550207 | 10550500 |
| chr10 | 10555236 | 10555607 |
| chr10 | 10557081 | 10557278 |
| chr10 | 10557278 | 10557479 |
| chr10 | 10557479 | 10557815 |
| chr10 | 10557815 | 10558128 |
| chr10 | 10558128 | 10558434 |
| chr10 | 10601755 | 10601941 |
| chr10 | 11023443 | 11023655 |
| chr10 | 11024188 | 11024338 |
| chr10 | 11024803 | 11025149 |
| chr10 | 11149089 | 11149679 |
| chr10 | 11149679 | 11150037 |
| chr10 | 11197285 | 11197699 |
| chr10 | 11197780 | 11197995 |
| chr10 | 11198119 | 11198273 |
| chr10 | 11198356 | 11198690 |
| chr10 | 11205917 | 11206134 |
| chr10 | 11260971 | 11261121 |
| chr10 | 11261439 | 11261795 |
| chr10 | 11280525 | 11281080 |
| chr10 | 11281080 | 11281396 |
| chr10 | 11281396 | 11281690 |
| chr10 | 11281808 | 11282014 |
| chr10 | 11300558 | 11300714 |
| chr10 | 11343161 | 11344095 |
| chr10 | 11350662 | 11350865 |
| chr10 | 11352606 | 11352915 |
| chr10 | 11352915 | 11353273 |
| chr10 | 11362409 | 11362571 |
| chr10 | 11449572 | 11449723 |
| chr10 | 11449977 | 11450189 |
| chr10 | 11491999 | 11492310 |
| chr10 | 11609180 | 11609382 |
| chr10 | 11826900 | 11827267 |
| chr10 | 11841649 | 11841923 |
| chr10 | 11842332 | 11842520 |

|       |          |          |
|-------|----------|----------|
| chr10 | 11880678 | 11880838 |
| chr10 | 12013674 | 12014027 |
| chr10 | 12028740 | 12029114 |
| chr10 | 12035159 | 12035693 |
| chr10 | 12035744 | 12035976 |
| chr10 | 12091665 | 12091862 |
| chr10 | 12092022 | 12092185 |
| chr10 | 12101015 | 12101274 |
| chr10 | 12106943 | 12107476 |
| chr10 | 12144242 | 12144417 |
| chr10 | 12144702 | 12145070 |
| chr10 | 12147219 | 12147463 |
| chr10 | 12147463 | 12147671 |
| chr10 | 12180382 | 12180735 |
| chr10 | 12180799 | 12181327 |
| chr10 | 12193486 | 12193880 |
| chr10 | 12196024 | 12196193 |
| chr10 | 12207164 | 12207683 |
| chr10 | 12207683 | 12207906 |
| chr10 | 12246369 | 12246586 |
| chr10 | 12248833 | 12249351 |
| chr10 | 12298629 | 12299089 |
| chr10 | 12299089 | 12299518 |
| chr10 | 12310050 | 12310200 |
| chr10 | 12315193 | 12315457 |
| chr10 | 12315962 | 12316137 |
| chr10 | 12336969 | 12337174 |
| chr10 | 12365507 | 12365678 |
| chr10 | 12376897 | 12377047 |
| chr10 | 12411585 | 12411764 |
| chr10 | 12412155 | 12412506 |
| chr10 | 12507736 | 12507969 |
| chr10 | 12535293 | 12535486 |
| chr10 | 12556908 | 12557082 |
| chr10 | 12566990 | 12567140 |
| chr10 | 12601249 | 12601522 |
| chr10 | 12608328 | 12608530 |
| chr10 | 12612542 | 12612783 |
| chr10 | 12658476 | 12658678 |
| chr10 | 12690703 | 12690929 |
| chr10 | 12694659 | 12695207 |
| chr10 | 12696765 | 12697153 |



|       |          |          |
|-------|----------|----------|
| chr10 | 12698365 | 12698654 |
| chr10 | 12704278 | 12704719 |
| chr10 | 12714428 | 12714819 |
| chr10 | 12719452 | 12719704 |
| chr10 | 12726182 | 12726693 |
| chr10 | 12743098 | 12743313 |
| chr10 | 12755022 | 12755227 |
| chr10 | 12756985 | 12757152 |
| chr10 | 12787722 | 12787996 |
| chr10 | 12787996 | 12788457 |
| chr10 | 12799571 | 12799728 |
| chr10 | 12803970 | 12804412 |
| chr10 | 12804476 | 12804662 |
| chr10 | 12806916 | 12807270 |
| chr10 | 12809665 | 12810004 |
| chr10 | 12810696 | 12811374 |
| chr10 | 12817410 | 12817751 |
| chr10 | 12821210 | 12821761 |
| chr10 | 12823950 | 12824148 |
| chr10 | 12826684 | 12827339 |
| chr10 | 12827512 | 12827674 |
| chr10 | 12827862 | 12828045 |
| chr10 | 12837743 | 12837991 |
| chr10 | 12842527 | 12842874 |
| chr10 | 12850804 | 12851079 |
| chr10 | 12851089 | 12851373 |
| chr10 | 12852383 | 12852807 |
| chr10 | 12852997 | 12853194 |
| chr10 | 12854521 | 12854684 |
| chr10 | 12858041 | 12858402 |
| chr10 | 12858438 | 12858814 |
| chr10 | 12858814 | 12859072 |
| chr10 | 12861318 | 12861709 |
| chr10 | 12862158 | 12862390 |
| chr10 | 12868033 | 12868487 |
| chr10 | 12868487 | 12868845 |
| chr10 | 12868917 | 12869373 |
| chr10 | 12869373 | 12869707 |
| chr10 | 12874901 | 12875161 |
| chr10 | 12876526 | 12876751 |
| chr10 | 12878547 | 12879101 |
| chr10 | 12884310 | 12884615 |

|       |          |          |
|-------|----------|----------|
| chr10 | 12884615 | 12884942 |
| chr10 | 12888351 | 12888711 |
| chr10 | 12890331 | 12890680 |
| chr10 | 12893160 | 12893776 |
| chr10 | 12903874 | 12904113 |
| chr10 | 12904261 | 12904411 |
| chr10 | 12909937 | 12910295 |
| chr10 | 12912209 | 12912456 |
| chr10 | 12912456 | 12912644 |
| chr10 | 12915893 | 12916136 |
| chr10 | 12916254 | 12916464 |
| chr10 | 12916464 | 12916681 |
| chr10 | 12919245 | 12919657 |
| chr10 | 12922326 | 12922604 |
| chr10 | 12922604 | 12923003 |
| chr10 | 12923003 | 12923361 |
| chr10 | 12929220 | 12929386 |
| chr10 | 12931108 | 12931308 |
| chr10 | 12931406 | 12931800 |
| chr10 | 12931800 | 12932084 |
| chr10 | 12932084 | 12932303 |
| chr10 | 12932373 | 12932612 |
| chr10 | 12936202 | 12936385 |
| chr10 | 12949340 | 12949882 |
| chr10 | 12955951 | 12956141 |
| chr10 | 12963262 | 12963568 |
| chr10 | 12963568 | 12963784 |
| chr10 | 12963899 | 12964161 |
| chr10 | 12964161 | 12964426 |
| chr10 | 12964426 | 12964784 |
| chr10 | 12965861 | 12966099 |
| chr10 | 12976558 | 12977075 |
| chr10 | 12977919 | 12978195 |
| chr10 | 12981200 | 12981453 |
| chr10 | 12992097 | 12992262 |
| chr10 | 12996817 | 12997417 |
| chr10 | 13008204 | 13008526 |
| chr10 | 13008526 | 13008772 |
| chr10 | 13008772 | 13009095 |
| chr10 | 13009662 | 13009913 |
| chr10 | 13016605 | 13016922 |
| chr10 | 13018602 | 13018769 |

|       |          |          |
|-------|----------|----------|
| chr10 | 13028320 | 13028542 |
| chr10 | 13035249 | 13035586 |
| chr10 | 13080276 | 13080546 |
| chr10 | 13087258 | 13087517 |
| chr10 | 13090451 | 13090993 |
| chr10 | 13090993 | 13091319 |
| chr10 | 13192678 | 13192983 |
| chr10 | 13192983 | 13193386 |
| chr10 | 13256261 | 13256411 |
| chr10 | 13270209 | 13270614 |
| chr10 | 13287299 | 13287449 |
| chr10 | 13288304 | 13288531 |
| chr10 | 13288531 | 13288808 |
| chr10 | 13303883 | 13304238 |
| chr10 | 13304608 | 13305061 |
| chr10 | 13323375 | 13323557 |
| chr10 | 13323557 | 13323731 |
| chr10 | 13323778 | 13323991 |
| chr10 | 13323991 | 13324475 |
| chr10 | 13328515 | 13328936 |
| chr10 | 13369672 | 13370009 |
| chr10 | 13370009 | 13370387 |
| chr10 | 13370387 | 13370576 |
| chr10 | 13370607 | 13371041 |
| chr10 | 13382065 | 13382292 |
| chr10 | 13402054 | 13402205 |
| chr10 | 13424433 | 13424833 |
| chr10 | 13446793 | 13447275 |
| chr10 | 13467019 | 13467169 |
| chr10 | 13473730 | 13473959 |
| chr10 | 13473959 | 13474195 |
| chr10 | 13474195 | 13474528 |
| chr10 | 13474528 | 13474843 |
| chr10 | 13489537 | 13489762 |
| chr10 | 13489762 | 13490302 |
| chr10 | 13500880 | 13501221 |
| chr10 | 13501221 | 13501547 |
| chr10 | 13501641 | 13501793 |
| chr10 | 13543583 | 13543863 |
| chr10 | 13552700 | 13553507 |
| chr10 | 13553535 | 13553692 |
| chr10 | 13564740 | 13564952 |

|       |          |          |
|-------|----------|----------|
| chr10 | 13576822 | 13577001 |
| chr10 | 13577155 | 13577546 |
| chr10 | 13584421 | 13584624 |
| chr10 | 13595875 | 13596617 |
| chr10 | 13601767 | 13602052 |
| chr10 | 13622905 | 13623138 |
| chr10 | 13641808 | 13642026 |
| chr10 | 13659392 | 13659634 |
| chr10 | 13663575 | 13664080 |
| chr10 | 13679494 | 13679703 |
| chr10 | 13683875 | 13684307 |
| chr10 | 13684402 | 13684815 |
| chr10 | 13739962 | 13740118 |
| chr10 | 13767236 | 13767388 |
| chr10 | 13775408 | 13775894 |
| chr10 | 13775918 | 13776469 |
| chr10 | 13783626 | 13783826 |
| chr10 | 13787269 | 13787436 |
| chr10 | 13788206 | 13788481 |
| chr10 | 13789542 | 13789766 |
| chr10 | 13789766 | 13790121 |
| chr10 | 13792834 | 13793141 |
| chr10 | 13805067 | 13805448 |
| chr10 | 13822891 | 13823090 |
| chr10 | 13826981 | 13827148 |
| chr10 | 13832545 | 13833108 |
| chr10 | 13833108 | 13833499 |
| chr10 | 13842867 | 13843125 |
| chr10 | 13861127 | 13861322 |
| chr10 | 13861375 | 13861756 |
| chr10 | 13861849 | 13862194 |
| chr10 | 13868385 | 13868720 |
| chr10 | 13868720 | 13869285 |
| chr10 | 13869347 | 13869702 |
| chr10 | 13869702 | 13870043 |
| chr10 | 13878711 | 13878984 |
| chr10 | 13928616 | 13928804 |
| chr10 | 13964535 | 13965254 |
| chr10 | 13965502 | 13965896 |
| chr10 | 13965896 | 13966191 |
| chr10 | 13966191 | 13966449 |
| chr10 | 13966532 | 13966712 |

|       |          |          |
|-------|----------|----------|
| chr10 | 13966867 | 13967167 |
| chr10 | 13967410 | 13967750 |
| chr10 | 13969115 | 13969270 |
| chr10 | 13972894 | 13973071 |
| chr10 | 13973881 | 13974264 |
| chr10 | 13976387 | 13976557 |
| chr10 | 13982754 | 13983148 |
| chr10 | 13983148 | 13983427 |
| chr10 | 13983677 | 13983993 |
| chr10 | 13983995 | 13984163 |
| chr10 | 13984279 | 13984533 |
| chr10 | 14017745 | 14018438 |
| chr10 | 14018778 | 14018977 |
| chr10 | 14027801 | 14028007 |
| chr10 | 14030527 | 14030744 |
| chr10 | 14030744 | 14031196 |
| chr10 | 14041352 | 14041529 |
| chr10 | 14047013 | 14047230 |
| chr10 | 14048285 | 14048526 |
| chr10 | 14048526 | 14049051 |
| chr10 | 14070790 | 14071024 |
| chr10 | 14085179 | 14085399 |
| chr10 | 14085438 | 14085725 |
| chr10 | 14085950 | 14086221 |
| chr10 | 14086221 | 14086543 |
| chr10 | 14192079 | 14192324 |
| chr10 | 14197413 | 14197572 |
| chr10 | 14200450 | 14200659 |
| chr10 | 14213373 | 14213600 |
| chr10 | 14215587 | 14215763 |
| chr10 | 14233395 | 14233686 |
| chr10 | 14239749 | 14239961 |
| chr10 | 14240144 | 14240459 |
| chr10 | 14303525 | 14303893 |
| chr10 | 14304288 | 14304440 |
| chr10 | 14307269 | 14307518 |
| chr10 | 14307518 | 14307969 |
| chr10 | 14312000 | 14312208 |
| chr10 | 14313008 | 14313293 |
| chr10 | 14313986 | 14314481 |
| chr10 | 14314617 | 14314966 |
| chr10 | 14321604 | 14321816 |

|       |          |          |
|-------|----------|----------|
| chr10 | 14332528 | 14333000 |
| chr10 | 14341324 | 14341793 |
| chr10 | 14385660 | 14385845 |
| chr10 | 14391034 | 14391307 |
| chr10 | 14391307 | 14391596 |
| chr10 | 14404152 | 14404307 |
| chr10 | 14451922 | 14452107 |
| chr10 | 14463898 | 14464160 |
| chr10 | 14464160 | 14464780 |
| chr10 | 14476835 | 14477043 |
| chr10 | 14491833 | 14492118 |
| chr10 | 14507223 | 14507519 |
| chr10 | 14509680 | 14510059 |
| chr10 | 14527773 | 14528167 |
| chr10 | 14530740 | 14530903 |
| chr10 | 14531139 | 14531573 |
| chr10 | 14534115 | 14534303 |
| chr10 | 14544656 | 14545175 |
| chr10 | 14545175 | 14545509 |
| chr10 | 14545509 | 14545750 |
| chr10 | 14546092 | 14546364 |
| chr10 | 14573962 | 14574189 |
| chr10 | 14574278 | 14574606 |
| chr10 | 14582814 | 14583269 |
| chr10 | 14583552 | 14583765 |
| chr10 | 14601035 | 14601453 |
| chr10 | 14602653 | 14603158 |
| chr10 | 14618340 | 14618536 |
| chr10 | 14630099 | 14630253 |
| chr10 | 14639650 | 14640011 |
| chr10 | 14659616 | 14659845 |
| chr10 | 14660948 | 14661197 |
| chr10 | 14685760 | 14686024 |
| chr10 | 14686039 | 14686412 |
| chr10 | 14686412 | 14686681 |
| chr10 | 14691131 | 14691504 |
| chr10 | 14692876 | 14693116 |
| chr10 | 14693116 | 14693422 |
| chr10 | 14705000 | 14705407 |
| chr10 | 14705407 | 14705747 |
| chr10 | 14705782 | 14706007 |
| chr10 | 14902039 | 14902248 |

|       |          |          |
|-------|----------|----------|
| chr10 | 14941962 | 14942212 |
| chr10 | 14959088 | 14959375 |
| chr10 | 15037122 | 15037514 |
| chr10 | 15037514 | 15037977 |
| chr10 | 15080259 | 15080481 |
| chr10 | 15085275 | 15085441 |
| chr10 | 15137736 | 15137935 |
| chr10 | 15244455 | 15244713 |
| chr10 | 15300148 | 15300383 |
| chr10 | 15303260 | 15303443 |
| chr10 | 15706527 | 15706827 |
| chr10 | 15757555 | 15757791 |
| chr10 | 15844776 | 15844960 |
| chr10 | 15898273 | 15898584 |
| chr10 | 16014762 | 16015160 |
| chr10 | 16088224 | 16088568 |
| chr10 | 16119465 | 16119636 |
| chr10 | 16159497 | 16159939 |
| chr10 | 16160134 | 16160303 |
| chr10 | 16171329 | 16171542 |
| chr10 | 16301048 | 16301267 |
| chr10 | 16313701 | 16313885 |
| chr10 | 16429313 | 16429564 |
| chr10 | 16498610 | 16499073 |
| chr10 | 16507347 | 16507578 |
| chr10 | 16507594 | 16508024 |
| chr10 | 16508024 | 16508298 |
| chr10 | 16508298 | 16508573 |
| chr10 | 16524273 | 16524509 |
| chr10 | 16537608 | 16538104 |
| chr10 | 16544821 | 16545007 |
| chr10 | 16545260 | 16545522 |
| chr10 | 16545522 | 16545870 |
| chr10 | 16552982 | 16553195 |
| chr10 | 16553320 | 16553603 |
| chr10 | 16553603 | 16553863 |
| chr10 | 16578547 | 16579102 |
| chr10 | 16589242 | 16589395 |
| chr10 | 16589413 | 16589878 |
| chr10 | 16593727 | 16593916 |
| chr10 | 16600885 | 16601283 |
| chr10 | 16621418 | 16621586 |

|       |          |          |
|-------|----------|----------|
| chr10 | 16622868 | 16623242 |
| chr10 | 16678176 | 16678472 |
| chr10 | 16714601 | 16714815 |
| chr10 | 16804146 | 16804356 |
| chr10 | 16806085 | 16806258 |
| chr10 | 16863616 | 16863987 |
| chr10 | 16874175 | 16874438 |
| chr10 | 16878133 | 16878610 |
| chr10 | 16922178 | 16922425 |
| chr10 | 16990147 | 16990536 |
| chr10 | 17010071 | 17010336 |
| chr10 | 17011200 | 17011350 |
| chr10 | 17011882 | 17012163 |
| chr10 | 17012163 | 17012459 |
| chr10 | 17012459 | 17012959 |
| chr10 | 17013996 | 17014158 |
| chr10 | 17034812 | 17035411 |
| chr10 | 17037992 | 17038239 |
| chr10 | 17059871 | 17060270 |
| chr10 | 17065575 | 17065767 |
| chr10 | 17082928 | 17083320 |
| chr10 | 17099999 | 17100443 |
| chr10 | 17103419 | 17103790 |
| chr10 | 17129850 | 17130008 |
| chr10 | 17173981 | 17174131 |
| chr10 | 17175438 | 17175734 |
| chr10 | 17253020 | 17253370 |
| chr10 | 17298982 | 17299391 |
| chr10 | 17331009 | 17331236 |
| chr10 | 17347744 | 17348339 |
| chr10 | 17364469 | 17364627 |
| chr10 | 17368600 | 17369134 |
| chr10 | 17382944 | 17383140 |
| chr10 | 17394202 | 17394402 |
| chr10 | 17495900 | 17496324 |
| chr10 | 17506180 | 17506380 |
| chr10 | 17528903 | 17529216 |
| chr10 | 17531085 | 17531349 |
| chr10 | 17531349 | 17531587 |
| chr10 | 17548073 | 17548317 |
| chr10 | 17548844 | 17549545 |
| chr10 | 17549642 | 17549916 |



|       |          |          |
|-------|----------|----------|
| chr10 | 17549961 | 17550314 |
| chr10 | 17567490 | 17568189 |
| chr10 | 17574980 | 17575248 |
| chr10 | 17575451 | 17575817 |
| chr10 | 17575904 | 17576176 |
| chr10 | 17579568 | 17579750 |
| chr10 | 17584827 | 17585219 |
| chr10 | 17602539 | 17602843 |
| chr10 | 17605741 | 17605957 |
| chr10 | 17654344 | 17654675 |
| chr10 | 17654675 | 17654957 |
| chr10 | 17656403 | 17656619 |
| chr10 | 17656619 | 17656872 |
| chr10 | 17666440 | 17666637 |
| chr10 | 17668783 | 17669178 |
| chr10 | 17670094 | 17670441 |
| chr10 | 17670892 | 17671128 |
| chr10 | 17697375 | 17697684 |
| chr10 | 17697722 | 17698287 |
| chr10 | 17722168 | 17722583 |
| chr10 | 17722689 | 17723066 |
| chr10 | 17723066 | 17723381 |
| chr10 | 17723381 | 17723805 |
| chr10 | 17723899 | 17724240 |
| chr10 | 17724240 | 17724613 |
| chr10 | 17733090 | 17733406 |
| chr10 | 17734294 | 17734464 |
| chr10 | 17750414 | 17750682 |
| chr10 | 17760163 | 17760458 |
| chr10 | 17760844 | 17761333 |
| chr10 | 17765373 | 17765536 |
| chr10 | 17772331 | 17772750 |
| chr10 | 17774953 | 17775106 |
| chr10 | 17775145 | 17775450 |
| chr10 | 17775545 | 17775814 |
| chr10 | 17776407 | 17776734 |
| chr10 | 17776734 | 17777006 |
| chr10 | 17792643 | 17792897 |
| chr10 | 17792933 | 17793249 |
| chr10 | 17793432 | 17793891 |
| chr10 | 17793893 | 17794452 |
| chr10 | 17795321 | 17795523 |

|       |          |          |
|-------|----------|----------|
| chr10 | 17804929 | 17805355 |
| chr10 | 17842182 | 17842367 |
| chr10 | 17852643 | 17852910 |
| chr10 | 17857972 | 17858144 |
| chr10 | 17860754 | 17860962 |
| chr10 | 17861163 | 17861436 |
| chr10 | 17870006 | 17870311 |
| chr10 | 17918846 | 17919515 |
| chr10 | 17924170 | 17924466 |
| chr10 | 17946944 | 17947236 |
| chr10 | 17947236 | 17947506 |
| chr10 | 17947506 | 17947732 |
| chr10 | 17947832 | 17948334 |
| chr10 | 17948334 | 17948671 |
| chr10 | 17971683 | 17972098 |
| chr10 | 17997023 | 17997173 |
| chr10 | 17997185 | 17997668 |
| chr10 | 17997732 | 17997959 |
| chr10 | 17997959 | 17998185 |
| chr10 | 18005665 | 18005868 |
| chr10 | 18008174 | 18008430 |
| chr10 | 18022290 | 18022526 |
| chr10 | 18022526 | 18022754 |
| chr10 | 18022754 | 18023046 |
| chr10 | 18023046 | 18023445 |
| chr10 | 18055138 | 18055689 |
| chr10 | 18055689 | 18055977 |
| chr10 | 18055977 | 18056223 |
| chr10 | 18056223 | 18056442 |
| chr10 | 18076873 | 18077524 |
| chr10 | 18081559 | 18081893 |
| chr10 | 18082850 | 18083101 |
| chr10 | 18139215 | 18139411 |
| chr10 | 18197208 | 18197616 |
| chr10 | 18204099 | 18204366 |
| chr10 | 18205125 | 18205308 |
| chr10 | 18210730 | 18211096 |
| chr10 | 18234001 | 18234189 |
| chr10 | 18234600 | 18234868 |
| chr10 | 18234868 | 18235140 |
| chr10 | 18235140 | 18235435 |
| chr10 | 18235435 | 18235689 |

|       |          |          |
|-------|----------|----------|
| chr10 | 18243703 | 18243870 |
| chr10 | 18256444 | 18256606 |
| chr10 | 18298608 | 18298835 |
| chr10 | 18304981 | 18305669 |
| chr10 | 18311078 | 18311274 |
| chr10 | 18318263 | 18318820 |
| chr10 | 18318820 | 18319195 |
| chr10 | 18319195 | 18319471 |
| chr10 | 18320443 | 18320665 |
| chr10 | 18323033 | 18323489 |
| chr10 | 18323649 | 18324163 |
| chr10 | 18328576 | 18328816 |
| chr10 | 18329199 | 18329477 |
| chr10 | 18329477 | 18329757 |
| chr10 | 18329757 | 18330152 |
| chr10 | 18337780 | 18337993 |
| chr10 | 18350593 | 18351267 |
| chr10 | 18365409 | 18365710 |
| chr10 | 18370330 | 18370738 |
| chr10 | 18370738 | 18371319 |
| chr10 | 18388730 | 18389049 |
| chr10 | 18393626 | 18394042 |
| chr10 | 18406751 | 18407462 |
| chr10 | 18407462 | 18407984 |
| chr10 | 18420773 | 18421176 |
| chr10 | 18421180 | 18421335 |
| chr10 | 18430188 | 18430482 |
| chr10 | 18433538 | 18433822 |
| chr10 | 18453271 | 18453462 |
| chr10 | 18453462 | 18453734 |
| chr10 | 18455135 | 18455503 |
| chr10 | 18455900 | 18456058 |
| chr10 | 18469294 | 18469536 |
| chr10 | 18471669 | 18472051 |
| chr10 | 18492067 | 18492257 |
| chr10 | 18506421 | 18506610 |
| chr10 | 18536822 | 18537025 |
| chr10 | 18545683 | 18546400 |
| chr10 | 18563025 | 18563246 |
| chr10 | 18572669 | 18572882 |
| chr10 | 18602117 | 18602360 |
| chr10 | 18612840 | 18613319 |

|       |          |          |
|-------|----------|----------|
| chr10 | 18644792 | 18645020 |
| chr10 | 18705794 | 18706105 |
| chr10 | 18743262 | 18743614 |
| chr10 | 18743614 | 18744160 |
| chr10 | 18760324 | 18760551 |
| chr10 | 18784806 | 18785046 |
| chr10 | 18826803 | 18827099 |
| chr10 | 18836044 | 18836210 |
| chr10 | 18836210 | 18836383 |
| chr10 | 18844580 | 18844821 |
| chr10 | 18844821 | 18845499 |
| chr10 | 18850211 | 18850473 |
| chr10 | 18859689 | 18859988 |
| chr10 | 18860578 | 18860813 |
| chr10 | 18860890 | 18861163 |
| chr10 | 18863411 | 18863766 |
| chr10 | 18871129 | 18871279 |
| chr10 | 18876155 | 18876595 |
| chr10 | 18876595 | 18876886 |
| chr10 | 18886953 | 18887230 |
| chr10 | 18892038 | 18892339 |
| chr10 | 18892339 | 18892779 |
| chr10 | 18894458 | 18894741 |
| chr10 | 18910880 | 18911265 |
| chr10 | 18917062 | 18917372 |
| chr10 | 18929399 | 18929642 |
| chr10 | 18935059 | 18935539 |
| chr10 | 18936302 | 18936517 |
| chr10 | 18942069 | 18942260 |
| chr10 | 18946542 | 18946755 |
| chr10 | 18946755 | 18947096 |
| chr10 | 18948791 | 18949116 |
| chr10 | 18949183 | 18949625 |
| chr10 | 18953753 | 18954074 |
| chr10 | 18973517 | 18973721 |
| chr10 | 18987497 | 18987701 |
| chr10 | 18987869 | 18988219 |
| chr10 | 18995629 | 18995852 |
| chr10 | 18996389 | 18996818 |
| chr10 | 18999363 | 18999806 |
| chr10 | 19000033 | 19000241 |
| chr10 | 19002074 | 19002226 |

|       |          |          |
|-------|----------|----------|
| chr10 | 19002397 | 19002748 |
| chr10 | 19008416 | 19008644 |
| chr10 | 19008649 | 19009014 |
| chr10 | 19009427 | 19009678 |
| chr10 | 19011817 | 19012121 |
| chr10 | 19014389 | 19014778 |
| chr10 | 19014778 | 19015128 |
| chr10 | 19015128 | 19015440 |
| chr10 | 19015440 | 19015679 |
| chr10 | 19026505 | 19027169 |
| chr10 | 19028311 | 19028756 |
| chr10 | 19028756 | 19028998 |
| chr10 | 19043146 | 19043308 |
| chr10 | 19043935 | 19044296 |
| chr10 | 19044416 | 19044598 |
| chr10 | 19045965 | 19046397 |
| chr10 | 19046593 | 19046888 |
| chr10 | 19047574 | 19047741 |
| chr10 | 19061989 | 19062667 |
| chr10 | 19065195 | 19065370 |
| chr10 | 19065439 | 19065595 |
| chr10 | 19066878 | 19067076 |
| chr10 | 19068569 | 19068830 |
| chr10 | 19081767 | 19082466 |
| chr10 | 19082466 | 19082720 |
| chr10 | 19086978 | 19087391 |
| chr10 | 19091991 | 19092469 |
| chr10 | 19094383 | 19094633 |
| chr10 | 19099608 | 19099766 |
| chr10 | 19117292 | 19117686 |
| chr10 | 19118671 | 19119175 |
| chr10 | 19119175 | 19119653 |
| chr10 | 19126451 | 19126937 |
| chr10 | 19126937 | 19127373 |
| chr10 | 19127458 | 19127608 |
| chr10 | 19131112 | 19131317 |
| chr10 | 19139252 | 19139598 |
| chr10 | 19140298 | 19140616 |
| chr10 | 19140616 | 19141062 |
| chr10 | 19141127 | 19141297 |
| chr10 | 19149239 | 19149549 |
| chr10 | 19149549 | 19149777 |

|       |          |          |
|-------|----------|----------|
| chr10 | 19150083 | 19150505 |
| chr10 | 19150737 | 19151143 |
| chr10 | 19154103 | 19154331 |
| chr10 | 19162034 | 19162596 |
| chr10 | 19162910 | 19163090 |
| chr10 | 19167572 | 19168041 |
| chr10 | 19168041 | 19168392 |
| chr10 | 19168392 | 19168697 |
| chr10 | 19177143 | 19177419 |
| chr10 | 19177419 | 19177804 |
| chr10 | 19181237 | 19181416 |
| chr10 | 19185781 | 19185939 |
| chr10 | 19186000 | 19186254 |
| chr10 | 19186254 | 19186605 |
| chr10 | 19187907 | 19188242 |
| chr10 | 19188242 | 19188547 |
| chr10 | 19191514 | 19191842 |
| chr10 | 19192214 | 19192597 |
| chr10 | 19192763 | 19192924 |
| chr10 | 19192960 | 19193207 |
| chr10 | 19193207 | 19193571 |
| chr10 | 19220135 | 19220292 |
| chr10 | 19240141 | 19240340 |
| chr10 | 19268075 | 19268357 |
| chr10 | 19283303 | 19283501 |
| chr10 | 19312898 | 19313266 |
| chr10 | 19352876 | 19353027 |
| chr10 | 19353027 | 19353187 |
| chr10 | 19357105 | 19357435 |
| chr10 | 19384278 | 19384473 |
| chr10 | 19463921 | 19464367 |
| chr10 | 19464367 | 19464757 |
| chr10 | 19464757 | 19465016 |
| chr10 | 19491601 | 19491752 |
| chr10 | 19494476 | 19494743 |
| chr10 | 19514458 | 19514874 |
| chr10 | 19526072 | 19526237 |
| chr10 | 19526277 | 19526689 |
| chr10 | 19529702 | 19529966 |
| chr10 | 19531270 | 19531884 |
| chr10 | 19532035 | 19532268 |
| chr10 | 19533888 | 19534097 |

|       |          |          |
|-------|----------|----------|
| chr10 | 19555606 | 19555795 |
| chr10 | 19563383 | 19563578 |
| chr10 | 19569395 | 19569630 |
| chr10 | 19569853 | 19570369 |
| chr10 | 19570369 | 19570865 |
| chr10 | 19586641 | 19586868 |
| chr10 | 19591457 | 19591891 |
| chr10 | 19591891 | 19592128 |
| chr10 | 19592128 | 19592377 |
| chr10 | 19594640 | 19594797 |
| chr10 | 19598050 | 19598498 |
| chr10 | 19601530 | 19601727 |
| chr10 | 19639732 | 19639898 |
| chr10 | 19687761 | 19688130 |
| chr10 | 19693168 | 19693466 |
| chr10 | 19693712 | 19693938 |
| chr10 | 19705058 | 19705552 |
| chr10 | 19705564 | 19706001 |
| chr10 | 19708361 | 19708594 |
| chr10 | 19711651 | 19711864 |
| chr10 | 19712313 | 19712611 |
| chr10 | 19712611 | 19712835 |
| chr10 | 19721566 | 19721926 |
| chr10 | 19761980 | 19762369 |
| chr10 | 19811896 | 19812108 |
| chr10 | 19849518 | 19849691 |
| chr10 | 19850001 | 19850330 |
| chr10 | 19850490 | 19850890 |
| chr10 | 19850890 | 19851256 |
| chr10 | 19851256 | 19851487 |
| chr10 | 19851487 | 19851742 |
| chr10 | 19868895 | 19869048 |
| chr10 | 19875536 | 19875762 |
| chr10 | 19877288 | 19877623 |
| chr10 | 19893195 | 19893685 |
| chr10 | 19894066 | 19894301 |
| chr10 | 19907236 | 19907545 |
| chr10 | 19907545 | 19907806 |
| chr10 | 19915373 | 19915665 |
| chr10 | 19918032 | 19918240 |
| chr10 | 19933590 | 19934044 |
| chr10 | 19934044 | 19934328 |

|       |          |          |
|-------|----------|----------|
| chr10 | 19934328 | 19934629 |
| chr10 | 19934629 | 19935034 |
| chr10 | 19941816 | 19942415 |
| chr10 | 19945612 | 19945850 |
| chr10 | 19945850 | 19946092 |
| chr10 | 19946247 | 19946446 |
| chr10 | 19956736 | 19957148 |
| chr10 | 19964912 | 19965405 |
| chr10 | 19966989 | 19967197 |
| chr10 | 19990604 | 19990867 |
| chr10 | 19991178 | 19991530 |
| chr10 | 19991604 | 19992346 |
| chr10 | 20046154 | 20046387 |
| chr10 | 20073314 | 20073543 |
| chr10 | 20073613 | 20073817 |
| chr10 | 20076713 | 20077215 |
| chr10 | 20077215 | 20077520 |
| chr10 | 20077520 | 20077947 |
| chr10 | 20090999 | 20091315 |
| chr10 | 20091433 | 20091906 |
| chr10 | 20104350 | 20104704 |
| chr10 | 20104704 | 20105052 |
| chr10 | 20105498 | 20106070 |
| chr10 | 20106187 | 20106465 |
| chr10 | 20119360 | 20119900 |
| chr10 | 20123292 | 20123756 |
| chr10 | 20125156 | 20125571 |
| chr10 | 20148500 | 20149089 |
| chr10 | 20149089 | 20149336 |
| chr10 | 20149336 | 20149842 |
| chr10 | 20152218 | 20152493 |
| chr10 | 20159176 | 20159690 |
| chr10 | 20169221 | 20169741 |
| chr10 | 20170503 | 20170825 |
| chr10 | 20178840 | 20179156 |
| chr10 | 20179943 | 20180103 |
| chr10 | 20186595 | 20186919 |
| chr10 | 20186919 | 20187318 |
| chr10 | 20220505 | 20220814 |
| chr10 | 20220814 | 20221191 |
| chr10 | 20233388 | 20233795 |
| chr10 | 20235682 | 20235985 |



|       |          |          |
|-------|----------|----------|
| chr10 | 20239542 | 20239741 |
| chr10 | 20254586 | 20254810 |
| chr10 | 20269071 | 20269271 |
| chr10 | 20272012 | 20272354 |
| chr10 | 20272354 | 20272635 |
| chr10 | 20284967 | 20285210 |
| chr10 | 20285248 | 20285670 |
| chr10 | 20285670 | 20285963 |
| chr10 | 20290457 | 20290703 |
| chr10 | 20290703 | 20290918 |
| chr10 | 20294351 | 20294582 |
| chr10 | 20296106 | 20296266 |
| chr10 | 20311859 | 20312190 |
| chr10 | 20312190 | 20312640 |
| chr10 | 20312640 | 20313140 |
| chr10 | 20347369 | 20347644 |
| chr10 | 20347644 | 20348150 |
| chr10 | 20348154 | 20348330 |
| chr10 | 20361931 | 20362184 |
| chr10 | 20382850 | 20383166 |
| chr10 | 20383797 | 20384069 |
| chr10 | 20404306 | 20404486 |
| chr10 | 20405513 | 20405730 |
| chr10 | 20409072 | 20409561 |
| chr10 | 20459755 | 20459959 |
| chr10 | 20518137 | 20518706 |
| chr10 | 20527602 | 20527761 |
| chr10 | 20527808 | 20528080 |
| chr10 | 20547185 | 20547378 |
| chr10 | 20657773 | 20657948 |
| chr10 | 20658134 | 20658309 |
| chr10 | 20724950 | 20725133 |
| chr10 | 20768427 | 20768615 |
| chr10 | 20770471 | 20770733 |
| chr10 | 20773348 | 20773498 |
| chr10 | 20813284 | 20813483 |
| chr10 | 20817914 | 20818069 |
| chr10 | 20818175 | 20818407 |
| chr10 | 20818585 | 20818844 |
| chr10 | 20824963 | 20825159 |
| chr10 | 20825159 | 20825416 |
| chr10 | 20828326 | 20828820 |

|       |          |          |
|-------|----------|----------|
| chr10 | 20944315 | 20944651 |
| chr10 | 20944651 | 20944932 |
| chr10 | 20948503 | 20948653 |
| chr10 | 20952040 | 20952384 |
| chr10 | 20952384 | 20952979 |
| chr10 | 20966110 | 20966517 |
| chr10 | 20992745 | 20992971 |
| chr10 | 21051358 | 21051728 |
| chr10 | 21115412 | 21115618 |
| chr10 | 21128316 | 21128536 |
| chr10 | 21158420 | 21158596 |
| chr10 | 21158714 | 21158874 |
| chr10 | 21158909 | 21159495 |
| chr10 | 21159651 | 21159900 |
| chr10 | 21159900 | 21160110 |
| chr10 | 21160537 | 21160919 |
| chr10 | 21160919 | 21161396 |
| chr10 | 21189054 | 21189257 |
| chr10 | 21252273 | 21252506 |
| chr10 | 21258134 | 21258317 |
| chr10 | 21287151 | 21287583 |
| chr10 | 21287631 | 21288068 |
| chr10 | 21294285 | 21294653 |
| chr10 | 21295740 | 21296118 |
| chr10 | 21296118 | 21296357 |
| chr10 | 21296357 | 21296674 |
| chr10 | 21334371 | 21334814 |
| chr10 | 21335253 | 21335531 |
| chr10 | 21335531 | 21335943 |
| chr10 | 21337199 | 21337388 |
| chr10 | 21369821 | 21370174 |
| chr10 | 21378680 | 21378914 |
| chr10 | 21382968 | 21383215 |
| chr10 | 21385681 | 21386028 |
| chr10 | 21399014 | 21399564 |
| chr10 | 21411574 | 21412092 |
| chr10 | 21414436 | 21414698 |
| chr10 | 21414967 | 21415351 |
| chr10 | 21421069 | 21421372 |
| chr10 | 21427548 | 21427715 |
| chr10 | 21458708 | 21458891 |
| chr10 | 21465405 | 21465727 |

|       |          |          |
|-------|----------|----------|
| chr10 | 21465760 | 21466091 |
| chr10 | 21476348 | 21476749 |
| chr10 | 21477321 | 21477597 |
| chr10 | 21490960 | 21491211 |
| chr10 | 21496901 | 21497186 |
| chr10 | 21497186 | 21497585 |
| chr10 | 21504391 | 21504764 |
| chr10 | 21504764 | 21505013 |
| chr10 | 21518383 | 21518636 |
| chr10 | 21527088 | 21527345 |
| chr10 | 21529155 | 21529340 |
| chr10 | 21529456 | 21529786 |
| chr10 | 21532205 | 21532711 |
| chr10 | 21533060 | 21533258 |
| chr10 | 21551577 | 21551794 |
| chr10 | 21577558 | 21577900 |
| chr10 | 21594917 | 21595091 |
| chr10 | 21601009 | 21601247 |
| chr10 | 21606988 | 21607252 |
| chr10 | 21611931 | 21612326 |
| chr10 | 21618814 | 21619209 |
| chr10 | 21619209 | 21619652 |
| chr10 | 21619670 | 21619820 |
| chr10 | 21639906 | 21640258 |
| chr10 | 21675059 | 21675252 |
| chr10 | 21685567 | 21685774 |
| chr10 | 21686019 | 21686485 |
| chr10 | 21687436 | 21687586 |
| chr10 | 21727392 | 21727554 |
| chr10 | 21727954 | 21728235 |
| chr10 | 21735982 | 21736224 |
| chr10 | 21773516 | 21774137 |
| chr10 | 21776305 | 21776464 |
| chr10 | 21776466 | 21776799 |
| chr10 | 21776799 | 21777076 |
| chr10 | 21782966 | 21783335 |
| chr10 | 21783524 | 21783828 |
| chr10 | 21783828 | 21784165 |
| chr10 | 21785764 | 21786224 |
| chr10 | 21789790 | 21790102 |
| chr10 | 21790102 | 21790853 |
| chr10 | 21790994 | 21791377 |

|       |          |          |
|-------|----------|----------|
| chr10 | 21796439 | 21796861 |
| chr10 | 21797145 | 21797511 |
| chr10 | 21798237 | 21798452 |
| chr10 | 21801431 | 21802068 |
| chr10 | 21807336 | 21807816 |
| chr10 | 21807865 | 21808145 |
| chr10 | 21808992 | 21809406 |
| chr10 | 21809449 | 21809620 |
| chr10 | 21809620 | 21809861 |
| chr10 | 21827605 | 21827791 |
| chr10 | 21831088 | 21831325 |
| chr10 | 21833554 | 21833787 |
| chr10 | 21833787 | 21834225 |
| chr10 | 21839234 | 21839672 |
| chr10 | 21844178 | 21844404 |
| chr10 | 21844449 | 21844764 |
| chr10 | 21845415 | 21845623 |
| chr10 | 21846426 | 21846824 |
| chr10 | 21847543 | 21847704 |
| chr10 | 21849252 | 21849607 |
| chr10 | 21853179 | 21853412 |
| chr10 | 21853630 | 21853821 |
| chr10 | 21854430 | 21854622 |
| chr10 | 21857730 | 21857950 |
| chr10 | 21877359 | 21877669 |
| chr10 | 21879417 | 21879624 |
| chr10 | 21882194 | 21882351 |
| chr10 | 21886965 | 21887218 |
| chr10 | 21905572 | 21905919 |
| chr10 | 21934430 | 21934672 |
| chr10 | 21946712 | 21946907 |
| chr10 | 21974812 | 21975106 |
| chr10 | 21975282 | 21975707 |
| chr10 | 21979001 | 21979230 |
| chr10 | 21986190 | 21986465 |
| chr10 | 21991220 | 21991534 |
| chr10 | 21993104 | 21993362 |
| chr10 | 21993856 | 21994145 |
| chr10 | 21994145 | 21994401 |
| chr10 | 21994401 | 21994935 |
| chr10 | 22000057 | 22000579 |
| chr10 | 22000579 | 22000799 |

|       |          |          |
|-------|----------|----------|
| chr10 | 22000799 | 22001187 |
| chr10 | 22001717 | 22001940 |
| chr10 | 22005386 | 22005540 |
| chr10 | 22007906 | 22008067 |
| chr10 | 22010196 | 22010457 |
| chr10 | 22014633 | 22014795 |
| chr10 | 22036327 | 22036594 |
| chr10 | 22050970 | 22051162 |
| chr10 | 22058326 | 22059155 |
| chr10 | 22064830 | 22064985 |
| chr10 | 22103569 | 22103723 |
| chr10 | 22104051 | 22104240 |
| chr10 | 22114050 | 22114240 |
| chr10 | 22134440 | 22134738 |
| chr10 | 22134738 | 22134970 |
| chr10 | 22141004 | 22141258 |
| chr10 | 22142232 | 22142798 |
| chr10 | 22142798 | 22143115 |
| chr10 | 22148384 | 22148714 |
| chr10 | 22148714 | 22149032 |
| chr10 | 22149032 | 22149381 |
| chr10 | 22158330 | 22158746 |
| chr10 | 22163441 | 22163703 |
| chr10 | 22163703 | 22164047 |
| chr10 | 22165718 | 22165875 |
| chr10 | 22169134 | 22169633 |
| chr10 | 22169831 | 22169993 |
| chr10 | 22192039 | 22192191 |
| chr10 | 22194787 | 22194987 |
| chr10 | 22202761 | 22203133 |
| chr10 | 22203152 | 22203309 |
| chr10 | 22212070 | 22212721 |
| chr10 | 22223418 | 22223803 |
| chr10 | 22223803 | 22224128 |
| chr10 | 22277640 | 22277804 |
| chr10 | 22295937 | 22296113 |
| chr10 | 22312504 | 22312701 |
| chr10 | 22357416 | 22357732 |
| chr10 | 22393026 | 22393360 |
| chr10 | 22402313 | 22402934 |
| chr10 | 22413657 | 22414017 |
| chr10 | 22414017 | 22414341 |

|       |          |          |
|-------|----------|----------|
| chr10 | 22448321 | 22448473 |
| chr10 | 22470367 | 22470660 |
| chr10 | 22470660 | 22471059 |
| chr10 | 22471318 | 22471612 |
| chr10 | 22479935 | 22480151 |
| chr10 | 22579501 | 22579729 |
| chr10 | 22618987 | 22619149 |
| chr10 | 22645201 | 22645456 |
| chr10 | 22696973 | 22697150 |
| chr10 | 22698297 | 22699042 |
| chr10 | 22699630 | 22699800 |
| chr10 | 22701705 | 22701860 |
| chr10 | 22701999 | 22702225 |
| chr10 | 22713770 | 22714083 |
| chr10 | 22714602 | 22714866 |
| chr10 | 22730302 | 22730561 |
| chr10 | 22730834 | 22731044 |
| chr10 | 22731044 | 22731312 |
| chr10 | 22731312 | 22731636 |
| chr10 | 22731636 | 22732158 |
| chr10 | 22744595 | 22744874 |
| chr10 | 22744874 | 22745148 |
| chr10 | 22745148 | 22745367 |
| chr10 | 22745367 | 22745629 |
| chr10 | 22746009 | 22746164 |
| chr10 | 22774721 | 22774876 |
| chr10 | 22781564 | 22781715 |
| chr10 | 22815833 | 22816420 |
| chr10 | 22816449 | 22816624 |
| chr10 | 22853817 | 22853972 |
| chr10 | 22957024 | 22957443 |
| chr10 | 23080837 | 23080997 |
| chr10 | 23081360 | 23081604 |
| chr10 | 23086989 | 23087144 |
| chr10 | 23091971 | 23092437 |
| chr10 | 23116843 | 23117096 |
| chr10 | 23157035 | 23157193 |
| chr10 | 23161199 | 23161363 |
| chr10 | 23176238 | 23176535 |
| chr10 | 23177363 | 23177619 |
| chr10 | 23177636 | 23177973 |
| chr10 | 23177973 | 23178273 |

|       |          |          |
|-------|----------|----------|
| chr10 | 23184611 | 23184761 |
| chr10 | 23185084 | 23185845 |
| chr10 | 23198166 | 23198382 |
| chr10 | 23203930 | 23204328 |
| chr10 | 23228718 | 23228876 |
| chr10 | 23233562 | 23233831 |
| chr10 | 23348894 | 23349130 |
| chr10 | 23349130 | 23349328 |
| chr10 | 23349328 | 23349517 |
| chr10 | 23349517 | 23349725 |
| chr10 | 23349725 | 23350013 |
| chr10 | 23350013 | 23350367 |
| chr10 | 23350367 | 23350702 |
| chr10 | 23350740 | 23350952 |
| chr10 | 23365555 | 23365732 |
| chr10 | 23385355 | 23385516 |
| chr10 | 23421372 | 23421686 |
| chr10 | 23452944 | 23453151 |
| chr10 | 23457114 | 23457783 |
| chr10 | 23458254 | 23458690 |
| chr10 | 23511351 | 23511506 |
| chr10 | 23530659 | 23530988 |
| chr10 | 23533453 | 23533639 |
| chr10 | 23549286 | 23549493 |
| chr10 | 23549493 | 23549933 |
| chr10 | 23557396 | 23557789 |
| chr10 | 23557789 | 23558257 |
| chr10 | 23559476 | 23559656 |
| chr10 | 23569426 | 23569862 |
| chr10 | 23571024 | 23571423 |
| chr10 | 23613056 | 23613427 |
| chr10 | 23613521 | 23613949 |
| chr10 | 23621125 | 23621419 |
| chr10 | 23622053 | 23622374 |
| chr10 | 23626151 | 23626444 |
| chr10 | 23699059 | 23699296 |
| chr10 | 23703360 | 23703655 |
| chr10 | 23726374 | 23726560 |
| chr10 | 23749423 | 23749645 |
| chr10 | 23777377 | 23777551 |
| chr10 | 23780976 | 23781191 |
| chr10 | 23782992 | 23783316 |

|       |          |          |
|-------|----------|----------|
| chr10 | 23783316 | 23783650 |
| chr10 | 23784260 | 23784410 |
| chr10 | 23786664 | 23786986 |
| chr10 | 23786986 | 23787233 |
| chr10 | 23787233 | 23787505 |
| chr10 | 23787542 | 23787751 |
| chr10 | 23796586 | 23796933 |
| chr10 | 23796933 | 23797387 |
| chr10 | 23798267 | 23798417 |
| chr10 | 23809936 | 23810130 |
| chr10 | 23811609 | 23811762 |
| chr10 | 23812225 | 23812392 |
| chr10 | 23864600 | 23864757 |
| chr10 | 23886033 | 23886440 |
| chr10 | 23886440 | 23886790 |
| chr10 | 23894255 | 23894494 |
| chr10 | 23894570 | 23894765 |
| chr10 | 23894765 | 23895019 |
| chr10 | 23895019 | 23895248 |
| chr10 | 23897631 | 23897916 |
| chr10 | 23928047 | 23928287 |
| chr10 | 23928287 | 23928478 |
| chr10 | 23931530 | 23931802 |
| chr10 | 23935191 | 23935366 |
| chr10 | 23964996 | 23965296 |
| chr10 | 23974650 | 23974899 |
| chr10 | 23978411 | 23978877 |
| chr10 | 23979352 | 23979715 |
| chr10 | 23988565 | 23988757 |
| chr10 | 24006516 | 24006761 |
| chr10 | 24029065 | 24029510 |
| chr10 | 24051458 | 24051618 |
| chr10 | 24052928 | 24053133 |
| chr10 | 24053133 | 24053438 |
| chr10 | 24053438 | 24053759 |
| chr10 | 24055285 | 24055435 |
| chr10 | 24080254 | 24080480 |
| chr10 | 24111222 | 24111437 |
| chr10 | 24115751 | 24115978 |
| chr10 | 24125066 | 24125515 |
| chr10 | 24131520 | 24131747 |
| chr10 | 24131747 | 24131954 |



|       |          |          |
|-------|----------|----------|
| chr10 | 24132008 | 24132313 |
| chr10 | 24132313 | 24132683 |
| chr10 | 24133232 | 24133442 |
| chr10 | 24149058 | 24149411 |
| chr10 | 24149411 | 24149824 |
| chr10 | 24162857 | 24163109 |
| chr10 | 24164428 | 24164855 |
| chr10 | 24164855 | 24165218 |
| chr10 | 24173092 | 24173639 |
| chr10 | 24173684 | 24173956 |
| chr10 | 24190483 | 24190680 |
| chr10 | 24209970 | 24210510 |
| chr10 | 24210716 | 24211035 |
| chr10 | 24211035 | 24211316 |
| chr10 | 24212381 | 24212613 |
| chr10 | 24216904 | 24217102 |
| chr10 | 24223280 | 24223723 |
| chr10 | 24223723 | 24224113 |
| chr10 | 24226859 | 24227054 |
| chr10 | 24249697 | 24249876 |
| chr10 | 24298557 | 24298864 |
| chr10 | 24310560 | 24310824 |
| chr10 | 24312133 | 24312408 |
| chr10 | 24315518 | 24315795 |
| chr10 | 24365370 | 24365752 |
| chr10 | 24365771 | 24365964 |
| chr10 | 24366896 | 24367291 |
| chr10 | 24367291 | 24367749 |
| chr10 | 24372186 | 24372450 |
| chr10 | 24373384 | 24373751 |
| chr10 | 24373758 | 24374499 |
| chr10 | 24379207 | 24379649 |
| chr10 | 24382010 | 24382221 |
| chr10 | 24388301 | 24388785 |
| chr10 | 24392034 | 24392420 |
| chr10 | 24396050 | 24396377 |
| chr10 | 24396377 | 24396694 |
| chr10 | 24397057 | 24397726 |
| chr10 | 24404996 | 24405250 |
| chr10 | 24410044 | 24410307 |
| chr10 | 24438695 | 24438962 |
| chr10 | 24444688 | 24444878 |

|       |          |          |
|-------|----------|----------|
| chr10 | 24445049 | 24445327 |
| chr10 | 24446108 | 24446680 |
| chr10 | 24447101 | 24447521 |
| chr10 | 24451561 | 24451771 |
| chr10 | 24454917 | 24455132 |
| chr10 | 24458668 | 24459022 |
| chr10 | 24469128 | 24469340 |
| chr10 | 24469423 | 24469992 |
| chr10 | 24470449 | 24470615 |
| chr10 | 24470897 | 24471075 |
| chr10 | 24476353 | 24476577 |
| chr10 | 24478565 | 24479112 |
| chr10 | 24479112 | 24479633 |
| chr10 | 24482620 | 24482810 |
| chr10 | 24491891 | 24492235 |
| chr10 | 24493195 | 24493456 |
| chr10 | 24493456 | 24493773 |
| chr10 | 24493987 | 24494282 |
| chr10 | 24552972 | 24553151 |
| chr10 | 24554123 | 24554493 |
| chr10 | 24572440 | 24572747 |
| chr10 | 24580999 | 24581382 |
| chr10 | 24581382 | 24581763 |
| chr10 | 24588981 | 24589249 |
| chr10 | 24589288 | 24589661 |
| chr10 | 24589847 | 24589997 |
| chr10 | 24591290 | 24591440 |
| chr10 | 24591851 | 24592060 |
| chr10 | 24592362 | 24592648 |
| chr10 | 24595273 | 24595528 |
| chr10 | 24595528 | 24596089 |
| chr10 | 24596205 | 24596674 |
| chr10 | 24596719 | 24596960 |
| chr10 | 24597363 | 24597531 |
| chr10 | 24599412 | 24599726 |
| chr10 | 24621735 | 24621885 |
| chr10 | 24622652 | 24622825 |
| chr10 | 24625162 | 24625387 |
| chr10 | 24628509 | 24628762 |
| chr10 | 24628839 | 24629597 |
| chr10 | 24635352 | 24635575 |
| chr10 | 24635575 | 24635929 |

|       |          |          |
|-------|----------|----------|
| chr10 | 24635929 | 24636432 |
| chr10 | 24637067 | 24637270 |
| chr10 | 24638335 | 24638638 |
| chr10 | 24711444 | 24711862 |
| chr10 | 24711862 | 24712343 |
| chr10 | 24728512 | 24728708 |
| chr10 | 24732232 | 24732402 |
| chr10 | 24739057 | 24739570 |
| chr10 | 24739637 | 24739955 |
| chr10 | 24741337 | 24741500 |
| chr10 | 24741650 | 24741863 |
| chr10 | 24741909 | 24742097 |
| chr10 | 24753535 | 24753858 |
| chr10 | 24754010 | 24754190 |
| chr10 | 24754190 | 24754420 |
| chr10 | 24754420 | 24754695 |
| chr10 | 24755967 | 24756364 |
| chr10 | 24756483 | 24756712 |
| chr10 | 24765289 | 24765755 |
| chr10 | 24766264 | 24766414 |
| chr10 | 24780901 | 24781139 |
| chr10 | 24783970 | 24784365 |
| chr10 | 24789783 | 24790034 |
| chr10 | 24797337 | 24797554 |
| chr10 | 24822064 | 24822323 |
| chr10 | 24822323 | 24822642 |
| chr10 | 24830539 | 24830745 |
| chr10 | 24869643 | 24870101 |
| chr10 | 24870101 | 24870473 |
| chr10 | 24879278 | 24879582 |
| chr10 | 24884346 | 24884686 |
| chr10 | 24886091 | 24886422 |
| chr10 | 24907462 | 24907623 |
| chr10 | 24917917 | 24918204 |
| chr10 | 24924588 | 24925335 |
| chr10 | 24927483 | 24927757 |
| chr10 | 24931539 | 24931869 |
| chr10 | 24961141 | 24961409 |
| chr10 | 24972188 | 24972546 |
| chr10 | 24972732 | 24973345 |
| chr10 | 24973389 | 24973707 |
| chr10 | 24984624 | 24985209 |

|       |          |          |
|-------|----------|----------|
| chr10 | 25039568 | 25039797 |
| chr10 | 25040100 | 25040278 |
| chr10 | 25061392 | 25062111 |
| chr10 | 25072721 | 25072969 |
| chr10 | 25084802 | 25085147 |
| chr10 | 25119211 | 25119386 |
| chr10 | 25128563 | 25128893 |
| chr10 | 25155902 | 25156187 |
| chr10 | 25156249 | 25156561 |
| chr10 | 25167792 | 25167954 |
| chr10 | 25188151 | 25188553 |
| chr10 | 25213773 | 25213928 |
| chr10 | 25219233 | 25219395 |
| chr10 | 25224479 | 25224691 |
| chr10 | 25239228 | 25239489 |
| chr10 | 25246278 | 25246497 |
| chr10 | 25248428 | 25248587 |
| chr10 | 25252824 | 25253344 |
| chr10 | 25253545 | 25254175 |
| chr10 | 25268578 | 25268819 |
| chr10 | 25271753 | 25272065 |
| chr10 | 25272065 | 25272494 |
| chr10 | 25275560 | 25275716 |
| chr10 | 25278812 | 25279206 |
| chr10 | 25291136 | 25291402 |
| chr10 | 25296635 | 25297000 |
| chr10 | 25297000 | 25297359 |
| chr10 | 25303067 | 25303337 |
| chr10 | 25308785 | 25309131 |
| chr10 | 25314100 | 25314417 |
| chr10 | 25314417 | 25314667 |
| chr10 | 25317709 | 25318014 |
| chr10 | 25319578 | 25319871 |
| chr10 | 25331425 | 25331651 |
| chr10 | 25331675 | 25332181 |
| chr10 | 25340499 | 25340722 |
| chr10 | 25340722 | 25341004 |
| chr10 | 25345312 | 25345524 |
| chr10 | 25355133 | 25355312 |
| chr10 | 25359278 | 25359626 |
| chr10 | 25359626 | 25360134 |
| chr10 | 25360134 | 25360472 |

|       |          |          |
|-------|----------|----------|
| chr10 | 25360472 | 25360703 |
| chr10 | 25362388 | 25362595 |
| chr10 | 25366709 | 25367009 |
| chr10 | 25367125 | 25367348 |
| chr10 | 25377360 | 25377575 |
| chr10 | 25383467 | 25383922 |
| chr10 | 25383922 | 25384146 |
| chr10 | 25392870 | 25393172 |
| chr10 | 25395307 | 25396054 |
| chr10 | 25418574 | 25418739 |
| chr10 | 25426156 | 25426311 |
| chr10 | 25426520 | 25426672 |
| chr10 | 25426742 | 25427073 |
| chr10 | 25427073 | 25427348 |
| chr10 | 25432360 | 25432678 |
| chr10 | 25432708 | 25432960 |
| chr10 | 25433005 | 25433305 |
| chr10 | 25433544 | 25433945 |
| chr10 | 25434380 | 25434681 |
| chr10 | 25434734 | 25434933 |
| chr10 | 25436020 | 25436170 |
| chr10 | 25437701 | 25437889 |
| chr10 | 25439303 | 25439480 |
| chr10 | 25453154 | 25453325 |
| chr10 | 25457271 | 25457556 |
| chr10 | 25458038 | 25458336 |
| chr10 | 25458378 | 25458683 |
| chr10 | 25458820 | 25459179 |
| chr10 | 25488402 | 25488814 |
| chr10 | 25584083 | 25584264 |
| chr10 | 25594834 | 25595034 |
| chr10 | 25619819 | 25619969 |
| chr10 | 25621278 | 25621430 |
| chr10 | 25621463 | 25621732 |
| chr10 | 25640012 | 25640185 |
| chr10 | 25681339 | 25681545 |
| chr10 | 25690673 | 25690949 |
| chr10 | 25690949 | 25691242 |
| chr10 | 25691482 | 25691968 |
| chr10 | 25695511 | 25695838 |
| chr10 | 25695838 | 25696137 |
| chr10 | 25713170 | 25713320 |

|       |          |          |
|-------|----------|----------|
| chr10 | 25768574 | 25768725 |
| chr10 | 25787946 | 25788486 |
| chr10 | 25788664 | 25789019 |
| chr10 | 25824697 | 25824910 |
| chr10 | 25829326 | 25829543 |
| chr10 | 25918136 | 25918606 |
| chr10 | 25928458 | 25928689 |
| chr10 | 25947796 | 25948012 |
| chr10 | 25960555 | 25960705 |
| chr10 | 25960849 | 25961435 |
| chr10 | 25961435 | 25961824 |
| chr10 | 26078150 | 26078522 |
| chr10 | 26078531 | 26078876 |
| chr10 | 26078876 | 26079208 |
| chr10 | 26079756 | 26080171 |
| chr10 | 26082166 | 26082316 |
| chr10 | 26114359 | 26114808 |
| chr10 | 26139518 | 26139732 |
| chr10 | 26166658 | 26166900 |
| chr10 | 26176020 | 26176198 |
| chr10 | 26220815 | 26221027 |
| chr10 | 26232724 | 26233056 |
| chr10 | 26233073 | 26233381 |
| chr10 | 26244482 | 26244781 |
| chr10 | 26249828 | 26250036 |
| chr10 | 26250302 | 26250456 |
| chr10 | 26263758 | 26264591 |
| chr10 | 26273859 | 26274019 |
| chr10 | 26275487 | 26275751 |
| chr10 | 26280080 | 26280332 |
| chr10 | 26358331 | 26358486 |
| chr10 | 26358614 | 26358764 |
| chr10 | 26358799 | 26359040 |
| chr10 | 26359040 | 26359425 |
| chr10 | 26359716 | 26360063 |
| chr10 | 26372971 | 26373227 |
| chr10 | 26373984 | 26374252 |
| chr10 | 26374252 | 26374497 |
| chr10 | 26374627 | 26374905 |
| chr10 | 26374905 | 26375322 |
| chr10 | 26375367 | 26375588 |
| chr10 | 26375882 | 26376174 |

|       |          |          |
|-------|----------|----------|
| chr10 | 26496420 | 26496661 |
| chr10 | 26544136 | 26544397 |
| chr10 | 26544593 | 26545232 |
| chr10 | 26559404 | 26559720 |
| chr10 | 26564479 | 26564874 |
| chr10 | 26577104 | 26577439 |
| chr10 | 26607232 | 26607456 |
| chr10 | 26613276 | 26613705 |
| chr10 | 26639447 | 26639597 |
| chr10 | 26719584 | 26719804 |
| chr10 | 26752711 | 26752889 |
| chr10 | 26753223 | 26753775 |
| chr10 | 26761372 | 26761636 |
| chr10 | 26762586 | 26762784 |
| chr10 | 26772255 | 26772696 |
| chr10 | 26772696 | 26773033 |
| chr10 | 26773033 | 26773350 |
| chr10 | 26776548 | 26776729 |
| chr10 | 26780517 | 26780816 |
| chr10 | 26798851 | 26799435 |
| chr10 | 26799467 | 26800081 |
| chr10 | 26803300 | 26803620 |
| chr10 | 26807556 | 26807784 |
| chr10 | 26828420 | 26828750 |
| chr10 | 26828750 | 26829196 |
| chr10 | 26854490 | 26855025 |
| chr10 | 26867201 | 26867393 |
| chr10 | 26877371 | 26877681 |
| chr10 | 26890646 | 26890827 |
| chr10 | 26893059 | 26893560 |
| chr10 | 26895594 | 26896183 |
| chr10 | 26919628 | 26919878 |
| chr10 | 26939620 | 26939868 |
| chr10 | 26958430 | 26958924 |
| chr10 | 26962548 | 26962755 |
| chr10 | 26995692 | 26996043 |
| chr10 | 26996043 | 26996525 |
| chr10 | 27010366 | 27010903 |
| chr10 | 27012967 | 27013229 |
| chr10 | 27013236 | 27013513 |
| chr10 | 27022836 | 27022986 |
| chr10 | 27063721 | 27064020 |

|       |          |          |
|-------|----------|----------|
| chr10 | 27074390 | 27074576 |
| chr10 | 27116998 | 27117282 |
| chr10 | 27117681 | 27118352 |
| chr10 | 27133215 | 27133439 |
| chr10 | 27174165 | 27174619 |
| chr10 | 27174619 | 27174846 |
| chr10 | 27178159 | 27178630 |
| chr10 | 27245721 | 27245917 |
| chr10 | 27249599 | 27249908 |
| chr10 | 27249908 | 27250178 |
| chr10 | 27250178 | 27250383 |
| chr10 | 27250383 | 27250537 |
| chr10 | 27265955 | 27266122 |
| chr10 | 27375287 | 27375575 |
| chr10 | 27378299 | 27378612 |
| chr10 | 27459472 | 27459704 |
| chr10 | 27533316 | 27533569 |
| chr10 | 27538086 | 27538279 |
| chr10 | 27558536 | 27558686 |
| chr10 | 27595749 | 27595993 |
| chr10 | 27632895 | 27633238 |
| chr10 | 27633238 | 27633771 |
| chr10 | 27643625 | 27643812 |
| chr10 | 27643873 | 27644161 |
| chr10 | 27645745 | 27645993 |
| chr10 | 27654197 | 27654841 |
| chr10 | 27659051 | 27659279 |
| chr10 | 27663426 | 27663578 |
| chr10 | 27674475 | 27674650 |
| chr10 | 27729741 | 27729957 |
| chr10 | 27732853 | 27733030 |
| chr10 | 27809478 | 27809902 |
| chr10 | 27820339 | 27820587 |
| chr10 | 27822046 | 27822330 |
| chr10 | 27822342 | 27822492 |
| chr10 | 27822623 | 27822781 |
| chr10 | 27822781 | 27822941 |
| chr10 | 27823054 | 27823225 |
| chr10 | 27823414 | 27823565 |
| chr10 | 27823663 | 27823814 |
| chr10 | 27828373 | 27828637 |
| chr10 | 27828637 | 27828899 |



|       |          |          |
|-------|----------|----------|
| chr10 | 27829218 | 27829437 |
| chr10 | 27829745 | 27830170 |
| chr10 | 27863486 | 27864062 |
| chr10 | 27900934 | 27901261 |
| chr10 | 27912273 | 27912423 |
| chr10 | 27942822 | 27943037 |
| chr10 | 27968131 | 27968549 |
| chr10 | 27968655 | 27969044 |
| chr10 | 27969145 | 27969375 |
| chr10 | 27979814 | 27979986 |
| chr10 | 27983977 | 27984352 |
| chr10 | 27985018 | 27985456 |
| chr10 | 27985672 | 27986040 |
| chr10 | 27987012 | 27987351 |
| chr10 | 27988050 | 27988447 |
| chr10 | 28001684 | 28001899 |
| chr10 | 28001984 | 28002452 |
| chr10 | 28010858 | 28011066 |
| chr10 | 28014268 | 28014494 |
| chr10 | 28029085 | 28029255 |
| chr10 | 28061702 | 28061904 |
| chr10 | 28061904 | 28062336 |
| chr10 | 28066391 | 28066893 |
| chr10 | 28074401 | 28075078 |
| chr10 | 28075078 | 28075524 |
| chr10 | 28075662 | 28075886 |
| chr10 | 28075886 | 28076126 |
| chr10 | 28076126 | 28076456 |
| chr10 | 28083747 | 28083943 |
| chr10 | 28085997 | 28086267 |
| chr10 | 28087349 | 28087694 |
| chr10 | 28087694 | 28088016 |
| chr10 | 28094606 | 28095009 |
| chr10 | 28102553 | 28103136 |
| chr10 | 28105199 | 28105461 |
| chr10 | 28113261 | 28113472 |
| chr10 | 28113684 | 28114382 |
| chr10 | 28127411 | 28127651 |
| chr10 | 28128526 | 28128716 |
| chr10 | 28133772 | 28134076 |
| chr10 | 28157675 | 28157838 |
| chr10 | 28157984 | 28158288 |

|       |          |          |
|-------|----------|----------|
| chr10 | 28158296 | 28158680 |
| chr10 | 28160892 | 28161194 |
| chr10 | 28162994 | 28163187 |
| chr10 | 28163271 | 28163471 |
| chr10 | 28171000 | 28171241 |
| chr10 | 28171241 | 28171616 |
| chr10 | 28176064 | 28176259 |
| chr10 | 28178220 | 28178464 |
| chr10 | 28185474 | 28185662 |
| chr10 | 28191142 | 28191360 |
| chr10 | 28193507 | 28194002 |
| chr10 | 28194053 | 28194289 |
| chr10 | 28227662 | 28228154 |
| chr10 | 28228254 | 28228607 |
| chr10 | 28262241 | 28262566 |
| chr10 | 28299169 | 28299493 |
| chr10 | 28301268 | 28301455 |
| chr10 | 28303790 | 28304245 |
| chr10 | 28304493 | 28304810 |
| chr10 | 28380950 | 28381189 |
| chr10 | 28426935 | 28427139 |
| chr10 | 28492928 | 28493083 |
| chr10 | 28494085 | 28494241 |
| chr10 | 28662128 | 28662503 |
| chr10 | 28694851 | 28695407 |
| chr10 | 28695566 | 28695936 |
| chr10 | 28696523 | 28696724 |
| chr10 | 28730212 | 28730442 |
| chr10 | 28759165 | 28759366 |
| chr10 | 28798170 | 28798394 |
| chr10 | 28814734 | 28814884 |
| chr10 | 28825356 | 28825560 |
| chr10 | 28844230 | 28844392 |
| chr10 | 28860738 | 28860984 |
| chr10 | 28922403 | 28922592 |
| chr10 | 29030037 | 29030292 |
| chr10 | 29096907 | 29097282 |
| chr10 | 29146600 | 29147098 |
| chr10 | 29147098 | 29147317 |
| chr10 | 29147317 | 29147511 |
| chr10 | 29178094 | 29178320 |
| chr10 | 29206824 | 29206989 |

|       |          |          |
|-------|----------|----------|
| chr10 | 29285840 | 29286094 |
| chr10 | 29288514 | 29288679 |
| chr10 | 29313034 | 29313358 |
| chr10 | 29313358 | 29313700 |
| chr10 | 29333898 | 29334092 |
| chr10 | 29361381 | 29361963 |
| chr10 | 29361963 | 29362476 |
| chr10 | 29381517 | 29381984 |
| chr10 | 29394964 | 29395195 |
| chr10 | 29426203 | 29426353 |
| chr10 | 29433488 | 29433687 |
| chr10 | 29450702 | 29450994 |
| chr10 | 29532893 | 29533119 |
| chr10 | 29533370 | 29533645 |
| chr10 | 29534300 | 29534509 |
| chr10 | 29534509 | 29534696 |
| chr10 | 29534749 | 29535109 |
| chr10 | 29535427 | 29536019 |
| chr10 | 29554605 | 29554791 |
| chr10 | 29601355 | 29601562 |
| chr10 | 29698739 | 29698961 |
| chr10 | 29708403 | 29708760 |
| chr10 | 29708760 | 29709043 |
| chr10 | 29741118 | 29741471 |
| chr10 | 29788186 | 29788374 |
| chr10 | 29804271 | 29804438 |
| chr10 | 29815963 | 29816131 |
| chr10 | 29829765 | 29829916 |
| chr10 | 29875246 | 29875399 |
| chr10 | 29894700 | 29895049 |
| chr10 | 29897881 | 29898329 |
| chr10 | 29970890 | 29971105 |
| chr10 | 30069143 | 30069433 |
| chr10 | 30089515 | 30089775 |
| chr10 | 30102547 | 30102826 |
| chr10 | 30195155 | 30195315 |
| chr10 | 30200024 | 30200772 |
| chr10 | 30259690 | 30260253 |
| chr10 | 30314996 | 30315242 |
| chr10 | 30380569 | 30380839 |
| chr10 | 30411829 | 30412026 |
| chr10 | 30529970 | 30530220 |

|       |          |          |
|-------|----------|----------|
| chr10 | 30548237 | 30548414 |
| chr10 | 30552511 | 30552695 |
| chr10 | 30600059 | 30600308 |
| chr10 | 30600308 | 30600583 |
| chr10 | 30600583 | 30601042 |
| chr10 | 30608066 | 30608442 |
| chr10 | 30618005 | 30618301 |
| chr10 | 30618301 | 30618813 |
| chr10 | 30623006 | 30623210 |
| chr10 | 30628641 | 30628865 |
| chr10 | 30629632 | 30629820 |
| chr10 | 30636870 | 30637076 |
| chr10 | 30638149 | 30638554 |
| chr10 | 30639301 | 30639456 |
| chr10 | 30678143 | 30678314 |
| chr10 | 30686821 | 30687200 |
| chr10 | 30709981 | 30710242 |
| chr10 | 30712496 | 30712958 |
| chr10 | 30712958 | 30713256 |
| chr10 | 30718964 | 30719346 |
| chr10 | 30729163 | 30729475 |
| chr10 | 30729475 | 30729806 |
| chr10 | 30729806 | 30730140 |
| chr10 | 30737345 | 30737541 |
| chr10 | 30745302 | 30745494 |
| chr10 | 30745668 | 30745987 |
| chr10 | 30758655 | 30758821 |
| chr10 | 30778208 | 30778687 |
| chr10 | 30787633 | 30787933 |
| chr10 | 30802634 | 30802971 |
| chr10 | 30802971 | 30803224 |
| chr10 | 30803224 | 30803527 |
| chr10 | 30810208 | 30810453 |
| chr10 | 30810453 | 30810689 |
| chr10 | 30810742 | 30811281 |
| chr10 | 30825124 | 30825357 |
| chr10 | 30842317 | 30842691 |
| chr10 | 30842691 | 30843097 |
| chr10 | 30843097 | 30843328 |
| chr10 | 30843328 | 30843542 |
| chr10 | 30858953 | 30859144 |
| chr10 | 30866457 | 30866788 |

|       |          |          |
|-------|----------|----------|
| chr10 | 30898128 | 30898387 |
| chr10 | 30918639 | 30918938 |
| chr10 | 30919124 | 30919415 |
| chr10 | 30922410 | 30922565 |
| chr10 | 31034697 | 31035311 |
| chr10 | 31035548 | 31036168 |
| chr10 | 31079643 | 31079995 |
| chr10 | 31079995 | 31080321 |
| chr10 | 31089730 | 31090013 |
| chr10 | 31104645 | 31105109 |
| chr10 | 31112739 | 31112957 |
| chr10 | 31151045 | 31151322 |
| chr10 | 31161820 | 31162115 |
| chr10 | 31200360 | 31200615 |
| chr10 | 31201641 | 31201987 |
| chr10 | 31212182 | 31212630 |
| chr10 | 31231988 | 31232483 |
| chr10 | 31248544 | 31248730 |
| chr10 | 31257712 | 31257990 |
| chr10 | 31288799 | 31288956 |
| chr10 | 31299262 | 31299523 |
| chr10 | 31299554 | 31299772 |
| chr10 | 31312803 | 31313179 |
| chr10 | 31313179 | 31313511 |
| chr10 | 31313511 | 31313948 |
| chr10 | 31331427 | 31331660 |
| chr10 | 31336513 | 31336760 |
| chr10 | 31345668 | 31345974 |
| chr10 | 31346081 | 31346284 |
| chr10 | 31346489 | 31346639 |
| chr10 | 31346656 | 31347351 |
| chr10 | 31350809 | 31350986 |
| chr10 | 31354020 | 31354757 |
| chr10 | 31370157 | 31370502 |
| chr10 | 31402156 | 31402330 |
| chr10 | 31429337 | 31429534 |
| chr10 | 31434403 | 31434580 |
| chr10 | 31445239 | 31445461 |
| chr10 | 31445461 | 31445751 |
| chr10 | 31445751 | 31446189 |
| chr10 | 31446547 | 31446719 |
| chr10 | 31446891 | 31447362 |

|       |          |          |
|-------|----------|----------|
| chr10 | 31462586 | 31462956 |
| chr10 | 31462956 | 31463528 |
| chr10 | 31466695 | 31466845 |
| chr10 | 31467131 | 31467567 |
| chr10 | 31467634 | 31467807 |
| chr10 | 31479304 | 31479527 |
| chr10 | 31501698 | 31501998 |
| chr10 | 31503560 | 31503778 |
| chr10 | 31515069 | 31515369 |
| chr10 | 31519482 | 31519790 |
| chr10 | 31528704 | 31528963 |
| chr10 | 31532882 | 31533045 |
| chr10 | 31533557 | 31533781 |
| chr10 | 31536258 | 31536628 |
| chr10 | 31538252 | 31538626 |
| chr10 | 31538638 | 31539033 |
| chr10 | 31552923 | 31553085 |
| chr10 | 31553369 | 31553550 |
| chr10 | 31557337 | 31557904 |
| chr10 | 31557912 | 31558090 |
| chr10 | 31558329 | 31558571 |
| chr10 | 31592102 | 31592436 |
| chr10 | 31592493 | 31592645 |
| chr10 | 31592774 | 31593054 |
| chr10 | 31594049 | 31594215 |
| chr10 | 31594603 | 31594852 |
| chr10 | 31607025 | 31607194 |
| chr10 | 31608296 | 31608510 |
| chr10 | 31608510 | 31608817 |
| chr10 | 31608932 | 31609288 |
| chr10 | 31609288 | 31609577 |
| chr10 | 31609577 | 31610049 |
| chr10 | 31742473 | 31742745 |
| chr10 | 31874710 | 31874875 |
| chr10 | 32013671 | 32013955 |
| chr10 | 32019494 | 32019740 |
| chr10 | 32019740 | 32020070 |
| chr10 | 32037641 | 32037863 |
| chr10 | 32063242 | 32063578 |
| chr10 | 32063900 | 32064274 |
| chr10 | 32064366 | 32064777 |
| chr10 | 32073417 | 32073647 |

|       |          |          |
|-------|----------|----------|
| chr10 | 32077425 | 32078137 |
| chr10 | 32126295 | 32126636 |
| chr10 | 32149776 | 32149936 |
| chr10 | 32223705 | 32224227 |
| chr10 | 32350085 | 32350294 |
| chr10 | 32386321 | 32386588 |
| chr10 | 32775199 | 32775370 |
| chr10 | 32776380 | 32776780 |
| chr10 | 32781084 | 32781387 |
| chr10 | 32827898 | 32828168 |
| chr10 | 32828505 | 32828742 |
| chr10 | 32849032 | 32849345 |
| chr10 | 32857443 | 32857896 |
| chr10 | 32858260 | 32858499 |
| chr10 | 32889597 | 32890099 |
| chr10 | 32890099 | 32890481 |
| chr10 | 32890481 | 32890788 |
| chr10 | 32890800 | 32891116 |
| chr10 | 32965285 | 32965600 |
| chr10 | 32984716 | 32985364 |
| chr10 | 32986799 | 32987051 |
| chr10 | 33012673 | 33012828 |
| chr10 | 33073247 | 33073508 |
| chr10 | 33253227 | 33253388 |
| chr10 | 33333383 | 33333806 |
| chr10 | 33375511 | 33375724 |
| chr10 | 33557670 | 33557878 |
| chr10 | 33557878 | 33558133 |
| chr10 | 33558133 | 33558539 |
| chr10 | 33679891 | 33680043 |
| chr10 | 33716214 | 33716373 |
| chr10 | 33784030 | 33784285 |
| chr10 | 33888013 | 33888224 |
| chr10 | 33904723 | 33905158 |
| chr10 | 33905272 | 33905524 |
| chr10 | 33950811 | 33951446 |
| chr10 | 33986835 | 33987154 |
| chr10 | 34013308 | 34013681 |
| chr10 | 34019136 | 34020053 |
| chr10 | 34033934 | 34034255 |
| chr10 | 34035674 | 34035907 |
| chr10 | 34036237 | 34036593 |

|       |          |          |
|-------|----------|----------|
| chr10 | 34036641 | 34036896 |
| chr10 | 34060239 | 34060435 |
| chr10 | 34070917 | 34071119 |
| chr10 | 34071119 | 34071336 |
| chr10 | 34071336 | 34071638 |
| chr10 | 34071638 | 34071966 |
| chr10 | 34092014 | 34092278 |
| chr10 | 34096275 | 34096708 |
| chr10 | 34096708 | 34096917 |
| chr10 | 34127450 | 34127769 |
| chr10 | 34183769 | 34184126 |
| chr10 | 34206437 | 34206764 |
| chr10 | 34206764 | 34207068 |
| chr10 | 34207068 | 34207364 |
| chr10 | 34207364 | 34207609 |
| chr10 | 34208714 | 34208993 |
| chr10 | 34218212 | 34218441 |
| chr10 | 34231936 | 34232189 |
| chr10 | 34233111 | 34233349 |
| chr10 | 34234127 | 34234363 |
| chr10 | 34239404 | 34239660 |
| chr10 | 34280630 | 34280853 |
| chr10 | 34281291 | 34281509 |
| chr10 | 34281641 | 34281991 |
| chr10 | 34281991 | 34282418 |
| chr10 | 34282418 | 34282791 |
| chr10 | 34282791 | 34283032 |
| chr10 | 34297260 | 34297554 |
| chr10 | 34297554 | 34297959 |
| chr10 | 34307114 | 34307376 |
| chr10 | 34328342 | 34328631 |
| chr10 | 34342959 | 34343360 |
| chr10 | 34356530 | 34356875 |
| chr10 | 34382333 | 34382817 |
| chr10 | 34385744 | 34385953 |
| chr10 | 34418159 | 34418848 |
| chr10 | 34418923 | 34419185 |
| chr10 | 34444297 | 34444571 |
| chr10 | 34444571 | 34444946 |
| chr10 | 34464292 | 34464668 |
| chr10 | 34482784 | 34483026 |
| chr10 | 34483238 | 34483686 |



|       |          |          |
|-------|----------|----------|
| chr10 | 34483686 | 34484114 |
| chr10 | 34484114 | 34484490 |
| chr10 | 34485125 | 34485385 |
| chr10 | 34507848 | 34508212 |
| chr10 | 34508580 | 34509003 |
| chr10 | 34509319 | 34509596 |
| chr10 | 34513038 | 34513241 |
| chr10 | 34532329 | 34532672 |
| chr10 | 34532672 | 34533020 |
| chr10 | 34551688 | 34551899 |
| chr10 | 34552034 | 34552235 |
| chr10 | 34596489 | 34596719 |
| chr10 | 34618400 | 34618879 |
| chr10 | 34654408 | 34654674 |
| chr10 | 34719360 | 34719672 |
| chr10 | 34731342 | 34731576 |
| chr10 | 34731576 | 34731805 |
| chr10 | 34793770 | 34793989 |
| chr10 | 34794070 | 34794269 |
| chr10 | 34811176 | 34811438 |
| chr10 | 34904847 | 34905095 |
| chr10 | 35075075 | 35075341 |
| chr10 | 35441599 | 35441800 |
| chr10 | 35444020 | 35444241 |
| chr10 | 35552028 | 35552268 |
| chr10 | 35586022 | 35586196 |
| chr10 | 35586259 | 35586654 |
| chr10 | 35586920 | 35587071 |
| chr10 | 35714312 | 35714672 |
| chr10 | 35726450 | 35726877 |
| chr10 | 35727954 | 35728218 |
| chr10 | 35737711 | 35737919 |
| chr10 | 35814460 | 35814675 |
| chr10 | 35838350 | 35838605 |
| chr10 | 35884248 | 35884458 |
| chr10 | 35949043 | 35949434 |
| chr10 | 35972316 | 35972692 |
| chr10 | 36045215 | 36045400 |
| chr10 | 36125547 | 36125742 |
| chr10 | 36431425 | 36431671 |
| chr10 | 36483535 | 36483768 |
| chr10 | 36491684 | 36491895 |

|       |          |          |
|-------|----------|----------|
| chr10 | 36491978 | 36492301 |
| chr10 | 36492332 | 36492562 |
| chr10 | 36493671 | 36493953 |
| chr10 | 36506146 | 36506325 |
| chr10 | 36506528 | 36507135 |
| chr10 | 36507135 | 36507698 |
| chr10 | 36509901 | 36510114 |
| chr10 | 36513880 | 36514030 |
| chr10 | 36692034 | 36692255 |
| chr10 | 36848911 | 36849073 |
| chr10 | 36852761 | 36852992 |
| chr10 | 36910783 | 36910945 |
| chr10 | 36917821 | 36918566 |
| chr10 | 36964538 | 36964884 |
| chr10 | 36965672 | 36966161 |
| chr10 | 36973990 | 36974407 |
| chr10 | 36974407 | 36974663 |
| chr10 | 36974663 | 36974884 |
| chr10 | 36974884 | 36975227 |
| chr10 | 37014345 | 37014583 |
| chr10 | 37072952 | 37073102 |
| chr10 | 37136157 | 37136374 |
| chr10 | 37136968 | 37137446 |
| chr10 | 37138839 | 37139088 |
| chr10 | 37139187 | 37139339 |
| chr10 | 37140879 | 37141260 |
| chr10 | 37141260 | 37141537 |
| chr10 | 37141681 | 37141896 |
| chr10 | 37145576 | 37145726 |
| chr10 | 37170957 | 37171303 |
| chr10 | 37171580 | 37171925 |
| chr10 | 37171925 | 37172220 |
| chr10 | 37183401 | 37183599 |
| chr10 | 37185304 | 37185574 |
| chr10 | 37206944 | 37207344 |
| chr10 | 37207520 | 37207675 |
| chr10 | 37220513 | 37220835 |
| chr10 | 37227946 | 37228256 |
| chr10 | 37235176 | 37235326 |
| chr10 | 37240695 | 37240983 |
| chr10 | 37247205 | 37247459 |
| chr10 | 37278224 | 37278437 |

|       |          |          |
|-------|----------|----------|
| chr10 | 37278784 | 37279047 |
| chr10 | 37279258 | 37279570 |
| chr10 | 37279570 | 37279817 |
| chr10 | 37283014 | 37283224 |
| chr10 | 37305559 | 37305775 |
| chr10 | 37315150 | 37315385 |
| chr10 | 37320098 | 37320395 |
| chr10 | 37335186 | 37335570 |
| chr10 | 37335570 | 37335988 |
| chr10 | 37337070 | 37337657 |
| chr10 | 37348797 | 37349217 |
| chr10 | 37349319 | 37349645 |
| chr10 | 37357125 | 37357673 |
| chr10 | 37357673 | 37357999 |
| chr10 | 37360980 | 37361307 |
| chr10 | 37361413 | 37361684 |
| chr10 | 37367825 | 37368217 |
| chr10 | 37400474 | 37400770 |
| chr10 | 37450004 | 37450190 |
| chr10 | 37457213 | 37457504 |
| chr10 | 37457504 | 37457793 |
| chr10 | 37479994 | 37480295 |
| chr10 | 37480295 | 37481000 |
| chr10 | 37483592 | 37483888 |
| chr10 | 37484421 | 37484571 |
| chr10 | 37494196 | 37494419 |
| chr10 | 37502627 | 37502863 |
| chr10 | 37506048 | 37506326 |
| chr10 | 37506377 | 37506604 |
| chr10 | 37591639 | 37591913 |
| chr10 | 37616317 | 37616659 |
| chr10 | 37630472 | 37630738 |
| chr10 | 37803265 | 37803728 |
| chr10 | 37806463 | 37806649 |
| chr10 | 37820387 | 37820603 |
| chr10 | 37823690 | 37823911 |
| chr10 | 38059263 | 38059450 |
| chr10 | 38112034 | 38112352 |
| chr10 | 38123598 | 38123815 |
| chr10 | 38143063 | 38143372 |
| chr10 | 38147535 | 38147751 |
| chr10 | 38155071 | 38155227 |

|       |          |          |
|-------|----------|----------|
| chr10 | 38174285 | 38174738 |
| chr10 | 38180683 | 38180891 |
| chr10 | 38185589 | 38185884 |
| chr10 | 38246822 | 38247174 |
| chr10 | 38309086 | 38309246 |
| chr10 | 38521515 | 38521665 |
| chr10 | 38645005 | 38645174 |
| chr10 | 38647103 | 38647308 |
| chr10 | 38649466 | 38649724 |
| chr10 | 38965517 | 38965667 |
| chr10 | 38966038 | 38966199 |
| chr10 | 38977692 | 38977921 |
| chr10 | 38979484 | 38979703 |
| chr10 | 38994699 | 38994978 |
| chr10 | 39019822 | 39020235 |
| chr10 | 39064830 | 39065009 |
| chr10 | 39067049 | 39067308 |
| chr10 | 39107053 | 39107203 |
| chr10 | 39133605 | 39134106 |
| chr10 | 39134106 | 39134524 |
| chr10 | 39134982 | 39135145 |
| chr10 | 39157214 | 39157734 |
| chr10 | 39157759 | 39157982 |
| chr10 | 39161395 | 39161749 |
| chr10 | 39170200 | 39170514 |
| chr10 | 39170768 | 39170929 |
| chr10 | 39170929 | 39171084 |
| chr10 | 39171139 | 39171660 |
| chr10 | 39171712 | 39172069 |
| chr10 | 39176602 | 39176836 |
| chr10 | 39197002 | 39197182 |
| chr10 | 39239915 | 39240168 |
| chr10 | 39245235 | 39245467 |
| chr10 | 39248548 | 39248807 |
| chr10 | 39250767 | 39250940 |
| chr10 | 39251834 | 39252494 |
| chr10 | 39261732 | 39262107 |
| chr10 | 39272463 | 39272654 |
| chr10 | 39274338 | 39274587 |
| chr10 | 39274658 | 39274823 |
| chr10 | 39335936 | 39336267 |
| chr10 | 39359753 | 39360025 |

|       |          |          |
|-------|----------|----------|
| chr10 | 39361916 | 39362196 |
| chr10 | 39369411 | 39369963 |
| chr10 | 39369963 | 39370637 |
| chr10 | 39385850 | 39386218 |
| chr10 | 39386218 | 39386553 |
| chr10 | 39388188 | 39388418 |
| chr10 | 39403498 | 39403649 |
| chr10 | 39406306 | 39406576 |
| chr10 | 39412261 | 39412510 |
| chr10 | 39412690 | 39413074 |
| chr10 | 39413220 | 39413637 |
| chr10 | 39415576 | 39415957 |
| chr10 | 39430461 | 39430682 |
| chr10 | 39430837 | 39431150 |
| chr10 | 39431230 | 39431508 |
| chr10 | 39435049 | 39435495 |
| chr10 | 39436766 | 39436979 |
| chr10 | 39442172 | 39442373 |
| chr10 | 39442651 | 39442943 |
| chr10 | 39449277 | 39449531 |
| chr10 | 39449531 | 39449742 |
| chr10 | 39449762 | 39450347 |
| chr10 | 39477778 | 39478030 |
| chr10 | 39490774 | 39491119 |
| chr10 | 39503294 | 39503589 |
| chr10 | 39505852 | 39506112 |
| chr10 | 39518970 | 39519148 |
| chr10 | 39519855 | 39520005 |
| chr10 | 39520039 | 39520189 |
| chr10 | 39520192 | 39520416 |
| chr10 | 39520416 | 39520652 |
| chr10 | 39520652 | 39520850 |
| chr10 | 39521878 | 39522089 |
| chr10 | 39555330 | 39555482 |
| chr10 | 39566833 | 39567476 |
| chr10 | 39571021 | 39571236 |
| chr10 | 39572672 | 39573133 |
| chr10 | 39582502 | 39582664 |
| chr10 | 39600916 | 39601092 |
| chr10 | 39612905 | 39613350 |
| chr10 | 39613350 | 39613588 |
| chr10 | 39613588 | 39614034 |

|       |          |          |
|-------|----------|----------|
| chr10 | 39614683 | 39615040 |
| chr10 | 39644968 | 39645132 |
| chr10 | 39658817 | 39659370 |
| chr10 | 39659370 | 39659754 |
| chr10 | 39659754 | 39660116 |
| chr10 | 39660118 | 39660283 |
| chr10 | 39716617 | 39716771 |
| chr10 | 39731122 | 39731745 |
| chr10 | 39731745 | 39732026 |
| chr10 | 39732026 | 39732279 |
| chr10 | 39732279 | 39732555 |
| chr10 | 39732555 | 39732893 |
| chr10 | 39732893 | 39733243 |
| chr10 | 39742128 | 39742347 |
| chr10 | 39785018 | 39785219 |
| chr10 | 39811569 | 39811832 |
| chr10 | 39880462 | 39880614 |
| chr10 | 39881576 | 39882010 |
| chr10 | 39898789 | 39899486 |
| chr10 | 39919834 | 39919984 |
| chr10 | 39926680 | 39926905 |
| chr10 | 39926905 | 39927127 |
| chr10 | 39936612 | 39936937 |
| chr10 | 39939087 | 39939358 |
| chr10 | 39957120 | 39957275 |
| chr10 | 39959701 | 39960115 |
| chr10 | 39960115 | 39960526 |
| chr10 | 39960550 | 39960728 |
| chr10 | 39967621 | 39967781 |
| chr10 | 39984947 | 39985142 |
| chr10 | 40024693 | 40025143 |
| chr10 | 40025143 | 40025629 |
| chr10 | 40041432 | 40041648 |
| chr10 | 40042409 | 40042663 |
| chr10 | 40053379 | 40053605 |
| chr10 | 40063447 | 40063634 |
| chr10 | 40067018 | 40067267 |
| chr10 | 40067267 | 40067533 |
| chr10 | 40091076 | 40091333 |
| chr10 | 40094744 | 40095267 |
| chr10 | 40128489 | 40128715 |
| chr10 | 40141863 | 40142558 |

|       |          |          |
|-------|----------|----------|
| chr10 | 40152360 | 40152562 |
| chr10 | 40152565 | 40152929 |
| chr10 | 40162007 | 40162244 |
| chr10 | 40177657 | 40177937 |
| chr10 | 40212231 | 40212381 |
| chr10 | 40212447 | 40213032 |
| chr10 | 40246494 | 40246930 |
| chr10 | 40246930 | 40247207 |
| chr10 | 40247207 | 40247373 |
| chr10 | 40256741 | 40256995 |
| chr10 | 40257572 | 40257837 |
| chr10 | 40257959 | 40258274 |
| chr10 | 40258404 | 40259194 |
| chr10 | 40259218 | 40259468 |
| chr10 | 40259554 | 40259785 |
| chr10 | 40262306 | 40262511 |
| chr10 | 40263672 | 40264072 |
| chr10 | 40274076 | 40274258 |
| chr10 | 40281565 | 40281889 |
| chr10 | 40281889 | 40282250 |
| chr10 | 40282264 | 40282430 |
| chr10 | 40284474 | 40284705 |
| chr10 | 40284831 | 40285088 |
| chr10 | 40285095 | 40285245 |
| chr10 | 40292514 | 40293037 |
| chr10 | 40300700 | 40301144 |
| chr10 | 40301144 | 40301505 |
| chr10 | 40301505 | 40301765 |
| chr10 | 40302055 | 40302653 |
| chr10 | 40302829 | 40302984 |
| chr10 | 40307969 | 40308618 |
| chr10 | 40309885 | 40310263 |
| chr10 | 40310283 | 40310584 |
| chr10 | 40317210 | 40317471 |
| chr10 | 40328129 | 40328603 |
| chr10 | 40329877 | 40330278 |
| chr10 | 40330370 | 40330530 |
| chr10 | 40338122 | 40338351 |
| chr10 | 40338478 | 40338718 |
| chr10 | 40339003 | 40339215 |
| chr10 | 40339309 | 40339665 |
| chr10 | 40339665 | 40339943 |

|       |          |          |
|-------|----------|----------|
| chr10 | 40348556 | 40349029 |
| chr10 | 40349029 | 40349481 |
| chr10 | 40349481 | 40349814 |
| chr10 | 40349814 | 40350139 |
| chr10 | 40354660 | 40354955 |
| chr10 | 40355063 | 40355347 |
| chr10 | 40371270 | 40371498 |
| chr10 | 40372165 | 40372766 |
| chr10 | 40379105 | 40379373 |
| chr10 | 40379642 | 40380045 |
| chr10 | 40385464 | 40385698 |
| chr10 | 40416952 | 40417266 |
| chr10 | 40417266 | 40417625 |
| chr10 | 40428519 | 40428839 |
| chr10 | 40437144 | 40437491 |
| chr10 | 40457162 | 40457453 |
| chr10 | 40457534 | 40457715 |
| chr10 | 40465353 | 40465835 |
| chr10 | 40476270 | 40476571 |
| chr10 | 40479150 | 40479403 |
| chr10 | 40479403 | 40479701 |
| chr10 | 40487130 | 40487622 |
| chr10 | 40500879 | 40501210 |
| chr10 | 40510500 | 40511121 |
| chr10 | 40511121 | 40511754 |
| chr10 | 40511756 | 40512139 |
| chr10 | 40521257 | 40521480 |
| chr10 | 40521501 | 40521988 |
| chr10 | 40527052 | 40527421 |
| chr10 | 40527442 | 40527958 |
| chr10 | 40528440 | 40528632 |
| chr10 | 40529751 | 40529954 |
| chr10 | 40551674 | 40552209 |
| chr10 | 40584005 | 40584171 |
| chr10 | 40597187 | 40597524 |
| chr10 | 40629207 | 40629466 |
| chr10 | 40629808 | 40630037 |
| chr10 | 40645995 | 40646308 |
| chr10 | 40646308 | 40646633 |
| chr10 | 40646669 | 40646973 |
| chr10 | 40646973 | 40647214 |
| chr10 | 40648743 | 40649115 |



|       |          |          |
|-------|----------|----------|
| chr10 | 40683116 | 40683419 |
| chr10 | 40683536 | 40683771 |
| chr10 | 40712891 | 40713405 |
| chr10 | 40713405 | 40713701 |
| chr10 | 40808178 | 40808328 |
| chr10 | 40813693 | 40813960 |
| chr10 | 40830050 | 40830415 |
| chr10 | 40830415 | 40830632 |
| chr10 | 40832510 | 40832749 |
| chr10 | 40851238 | 40851477 |
| chr10 | 40865332 | 40865482 |
| chr10 | 40872024 | 40872499 |
| chr10 | 40880849 | 40881107 |
| chr10 | 40882967 | 40883185 |
| chr10 | 40883251 | 40883627 |
| chr10 | 40883627 | 40884077 |
| chr10 | 40884176 | 40884518 |
| chr10 | 40884543 | 40884809 |
| chr10 | 40908608 | 40908898 |
| chr10 | 40913502 | 40913710 |
| chr10 | 41003286 | 41003730 |
| chr10 | 41004410 | 41004687 |
| chr10 | 41015767 | 41016003 |
| chr10 | 41022338 | 41022537 |
| chr10 | 41028191 | 41028370 |
| chr10 | 41040611 | 41041041 |
| chr10 | 41163143 | 41163305 |
| chr10 | 41193530 | 41193709 |
| chr10 | 41200341 | 41200606 |
| chr10 | 41209536 | 41209902 |
| chr10 | 41209902 | 41210191 |
| chr10 | 41221135 | 41221520 |
| chr10 | 41224640 | 41224877 |
| chr10 | 41224999 | 41225295 |
| chr10 | 41225295 | 41225571 |
| chr10 | 41225605 | 41225997 |
| chr10 | 41226074 | 41226315 |
| chr10 | 41226315 | 41226528 |
| chr10 | 41244011 | 41244225 |
| chr10 | 41253176 | 41253394 |
| chr10 | 41282210 | 41282390 |
| chr10 | 41288754 | 41289149 |

|       |          |          |
|-------|----------|----------|
| chr10 | 41293079 | 41293409 |
| chr10 | 41302697 | 41302929 |
| chr10 | 41302929 | 41303140 |
| chr10 | 41303140 | 41303397 |
| chr10 | 41303611 | 41303771 |
| chr10 | 41303774 | 41304082 |
| chr10 | 41304141 | 41304336 |
| chr10 | 41375425 | 41375633 |
| chr10 | 41377908 | 41378323 |
| chr10 | 41417264 | 41417488 |
| chr10 | 41426531 | 41426696 |
| chr10 | 41432013 | 41432240 |
| chr10 | 41434678 | 41434971 |
| chr10 | 41436718 | 41436993 |
| chr10 | 41445035 | 41445243 |
| chr10 | 41449753 | 41449949 |
| chr10 | 41449990 | 41450743 |
| chr10 | 41460903 | 41461055 |
| chr10 | 41472976 | 41473186 |
| chr10 | 41477146 | 41477474 |
| chr10 | 41477474 | 41477755 |
| chr10 | 41477776 | 41478032 |
| chr10 | 41489450 | 41489638 |
| chr10 | 41489837 | 41490265 |
| chr10 | 41490265 | 41490750 |
| chr10 | 41505202 | 41505340 |
| chr10 | 41505340 | 41505486 |
| chr10 | 41505499 | 41505782 |
| chr10 | 41505782 | 41505994 |
| chr10 | 41509233 | 41509450 |
| chr10 | 41518475 | 41518754 |
| chr10 | 41518754 | 41518992 |
| chr10 | 41518992 | 41519189 |
| chr10 | 41519189 | 41519378 |
| chr10 | 41519378 | 41519683 |
| chr10 | 41519683 | 41519998 |
| chr10 | 41519998 | 41520204 |
| chr10 | 41553924 | 41554076 |
| chr10 | 41561747 | 41561974 |
| chr10 | 41564966 | 41565837 |
| chr10 | 41568422 | 41568633 |
| chr10 | 41571192 | 41571345 |

|       |          |          |
|-------|----------|----------|
| chr10 | 41575834 | 41576139 |
| chr10 | 41576444 | 41576844 |
| chr10 | 41579642 | 41579871 |
| chr10 | 41582933 | 41583353 |
| chr10 | 41587081 | 41587259 |
| chr10 | 41605510 | 41605787 |
| chr10 | 41611646 | 41612138 |
| chr10 | 41613581 | 41614070 |
| chr10 | 41652195 | 41652350 |
| chr10 | 41655763 | 41656009 |
| chr10 | 41659718 | 41660071 |
| chr10 | 41678859 | 41679149 |
| chr10 | 41680950 | 41681168 |
| chr10 | 41681492 | 41681854 |
| chr10 | 41682664 | 41682846 |
| chr10 | 41682846 | 41683108 |
| chr10 | 41684540 | 41684690 |
| chr10 | 41684770 | 41685040 |
| chr10 | 41689948 | 41690213 |
| chr10 | 41690267 | 41690626 |
| chr10 | 41690629 | 41690781 |
| chr10 | 41716632 | 41716904 |
| chr10 | 41731370 | 41731552 |
| chr10 | 41757269 | 41757479 |
| chr10 | 41796032 | 41796197 |
| chr10 | 41809528 | 41809803 |
| chr10 | 41809878 | 41810333 |
| chr10 | 41810333 | 41810676 |
| chr10 | 41810700 | 41810851 |
| chr10 | 41821949 | 41822145 |
| chr10 | 41822145 | 41822329 |
| chr10 | 41822439 | 41822647 |
| chr10 | 41822647 | 41822884 |
| chr10 | 41826566 | 41826794 |
| chr10 | 41830971 | 41831166 |
| chr10 | 41866262 | 41866591 |
| chr10 | 41887003 | 41887873 |
| chr10 | 41894099 | 41894395 |
| chr10 | 41930509 | 41930661 |
| chr10 | 41934661 | 41934953 |
| chr10 | 41934953 | 41935226 |
| chr10 | 41980788 | 41981072 |

|       |          |          |
|-------|----------|----------|
| chr10 | 41982813 | 41983060 |
| chr10 | 41986032 | 41986539 |
| chr10 | 41996286 | 41996608 |
| chr10 | 41997523 | 41997919 |
| chr10 | 41997940 | 41998207 |
| chr10 | 42017852 | 42018290 |
| chr10 | 42018290 | 42018615 |
| chr10 | 42028926 | 42029275 |
| chr10 | 42031092 | 42031327 |
| chr10 | 42032678 | 42032867 |
| chr10 | 42033563 | 42033933 |
| chr10 | 42033933 | 42034223 |
| chr10 | 42055291 | 42055531 |
| chr10 | 42070712 | 42070931 |
| chr10 | 42072847 | 42073019 |
| chr10 | 42079897 | 42080113 |
| chr10 | 42086713 | 42087107 |
| chr10 | 42088741 | 42088901 |
| chr10 | 42089158 | 42089682 |
| chr10 | 42089727 | 42090017 |
| chr10 | 42096618 | 42096820 |
| chr10 | 42098081 | 42098305 |
| chr10 | 42100712 | 42100938 |
| chr10 | 42101080 | 42101494 |
| chr10 | 42101559 | 42101868 |
| chr10 | 42107220 | 42107817 |
| chr10 | 42107817 | 42108171 |
| chr10 | 42114706 | 42115104 |
| chr10 | 42115816 | 42116252 |
| chr10 | 42121671 | 42122033 |
| chr10 | 42122044 | 42122397 |
| chr10 | 42127975 | 42128487 |
| chr10 | 42130490 | 42130838 |
| chr10 | 42134477 | 42134632 |
| chr10 | 42134849 | 42135173 |
| chr10 | 42135173 | 42135742 |
| chr10 | 42140659 | 42141133 |
| chr10 | 42148256 | 42148457 |
| chr10 | 42148457 | 42148681 |
| chr10 | 42167921 | 42168080 |
| chr10 | 42177820 | 42178230 |
| chr10 | 42178230 | 42178676 |

|       |          |          |
|-------|----------|----------|
| chr10 | 42207878 | 42208072 |
| chr10 | 42210788 | 42210951 |
| chr10 | 42216592 | 42216956 |
| chr10 | 42216999 | 42217231 |
| chr10 | 42219223 | 42219453 |
| chr10 | 42220142 | 42220420 |
| chr10 | 42220496 | 42220880 |
| chr10 | 42220900 | 42221058 |
| chr10 | 42222141 | 42222334 |
| chr10 | 42231136 | 42231564 |
| chr10 | 42244442 | 42244860 |
| chr10 | 42244925 | 42245221 |
| chr10 | 42269237 | 42269604 |
| chr10 | 42269604 | 42269834 |
| chr10 | 42269834 | 42270124 |
| chr10 | 42275551 | 42275860 |
| chr10 | 42276338 | 42276586 |
| chr10 | 42276586 | 42277074 |
| chr10 | 42277109 | 42277288 |
| chr10 | 42277559 | 42277985 |
| chr10 | 42277985 | 42278300 |
| chr10 | 42278300 | 42278520 |
| chr10 | 42287877 | 42288030 |
| chr10 | 42290750 | 42290942 |
| chr10 | 42291415 | 42291681 |
| chr10 | 42293989 | 42294239 |
| chr10 | 42295114 | 42295333 |
| chr10 | 42298051 | 42298263 |
| chr10 | 42299466 | 42299791 |
| chr10 | 42299974 | 42300410 |
| chr10 | 42303173 | 42303372 |
| chr10 | 42308280 | 42308432 |
| chr10 | 42310192 | 42310342 |
| chr10 | 42477901 | 42478289 |
| chr10 | 42478289 | 42478781 |
| chr10 | 42491193 | 42491699 |
| chr10 | 42492460 | 42492678 |
| chr10 | 42501707 | 42502275 |
| chr10 | 42502275 | 42502549 |
| chr10 | 42502549 | 42502787 |
| chr10 | 42521381 | 42521600 |
| chr10 | 42562331 | 42562615 |

|       |          |          |
|-------|----------|----------|
| chr10 | 42579921 | 42580071 |
| chr10 | 42611287 | 42611509 |
| chr10 | 42614019 | 42614489 |
| chr10 | 42633094 | 42633345 |
| chr10 | 42633531 | 42633835 |
| chr10 | 42633835 | 42634139 |
| chr10 | 42634139 | 42634435 |
| chr10 | 42637301 | 42637585 |
| chr10 | 42639876 | 42640191 |
| chr10 | 42669962 | 42670409 |
| chr10 | 42678687 | 42679075 |
| chr10 | 42679075 | 42679484 |
| chr10 | 42683334 | 42683529 |
| chr10 | 42684129 | 42684410 |
| chr10 | 42696896 | 42697108 |
| chr10 | 42697108 | 42697391 |
| chr10 | 42734658 | 42734864 |
| chr10 | 42754214 | 42754460 |
| chr10 | 42754460 | 42754836 |
| chr10 | 42759792 | 42760121 |
| chr10 | 42761217 | 42761751 |
| chr10 | 42761751 | 42762178 |
| chr10 | 42762178 | 42762474 |
| chr10 | 42781608 | 42782199 |
| chr10 | 42782199 | 42782555 |
| chr10 | 42830070 | 42830277 |
| chr10 | 42832778 | 42832952 |
| chr10 | 42833903 | 42834268 |
| chr10 | 42834268 | 42834678 |
| chr10 | 42835214 | 42835448 |
| chr10 | 42841917 | 42842072 |
| chr10 | 42842399 | 42842694 |
| chr10 | 42856752 | 42856929 |
| chr10 | 42857138 | 42857329 |
| chr10 | 42857615 | 42857858 |
| chr10 | 42858072 | 42858373 |
| chr10 | 42859818 | 42860107 |
| chr10 | 42860107 | 42860423 |
| chr10 | 42860646 | 42860896 |
| chr10 | 42863880 | 42864040 |
| chr10 | 42864116 | 42864464 |
| chr10 | 42864779 | 42865028 |

|       |          |          |
|-------|----------|----------|
| chr10 | 42888448 | 42888656 |
| chr10 | 42902253 | 42902446 |
| chr10 | 42907178 | 42907389 |
| chr10 | 42950262 | 42950629 |
| chr10 | 42950629 | 42950860 |
| chr10 | 42951028 | 42951371 |
| chr10 | 42957977 | 42958180 |
| chr10 | 42958229 | 42958504 |
| chr10 | 42958506 | 42958662 |
| chr10 | 42972848 | 42973117 |
| chr10 | 42987557 | 42987793 |
| chr10 | 42987817 | 42988060 |
| chr10 | 42989983 | 42990226 |
| chr10 | 42998567 | 42998758 |
| chr10 | 43021021 | 43021171 |
| chr10 | 43021518 | 43021960 |
| chr10 | 43034835 | 43035139 |
| chr10 | 43035729 | 43035936 |
| chr10 | 43068940 | 43069097 |
| chr10 | 43130113 | 43130271 |
| chr10 | 43143184 | 43143345 |
| chr10 | 43155077 | 43155392 |
| chr10 | 43173096 | 43173330 |
| chr10 | 43173330 | 43173553 |
| chr10 | 43173553 | 43173796 |
| chr10 | 43173834 | 43174004 |
| chr10 | 43174051 | 43174358 |
| chr10 | 43174358 | 43174627 |
| chr10 | 43174627 | 43174848 |
| chr10 | 43174848 | 43175111 |
| chr10 | 43203123 | 43203313 |
| chr10 | 43217554 | 43217835 |
| chr10 | 43220996 | 43221247 |
| chr10 | 43221247 | 43221664 |
| chr10 | 43221664 | 43222123 |
| chr10 | 43226515 | 43226683 |
| chr10 | 43226905 | 43227155 |
| chr10 | 43227155 | 43227606 |
| chr10 | 43228246 | 43228563 |
| chr10 | 43292495 | 43292760 |
| chr10 | 43310825 | 43311065 |
| chr10 | 43311075 | 43311348 |

|       |          |          |
|-------|----------|----------|
| chr10 | 43326236 | 43326426 |
| chr10 | 43330823 | 43330988 |
| chr10 | 43337932 | 43338151 |
| chr10 | 43375399 | 43375606 |
| chr10 | 43378315 | 43378604 |
| chr10 | 43382760 | 43382913 |
| chr10 | 43393893 | 43394136 |
| chr10 | 43397946 | 43398176 |
| chr10 | 43411317 | 43411494 |
| chr10 | 43423257 | 43423465 |
| chr10 | 43438348 | 43438880 |
| chr10 | 43439570 | 43439758 |
| chr10 | 43439758 | 43439925 |
| chr10 | 43441319 | 43441729 |
| chr10 | 43448783 | 43448946 |
| chr10 | 43452397 | 43452864 |
| chr10 | 43462885 | 43463218 |
| chr10 | 43463330 | 43463864 |
| chr10 | 43478025 | 43478241 |
| chr10 | 43478423 | 43478691 |
| chr10 | 43478834 | 43479134 |
| chr10 | 43479134 | 43479597 |
| chr10 | 43479597 | 43480179 |
| chr10 | 43489213 | 43489376 |
| chr10 | 43489471 | 43489856 |
| chr10 | 43490167 | 43490321 |
| chr10 | 43517100 | 43517314 |
| chr10 | 43517870 | 43518139 |
| chr10 | 43524066 | 43524225 |
| chr10 | 43540389 | 43540743 |
| chr10 | 43540743 | 43541237 |
| chr10 | 43549503 | 43549735 |
| chr10 | 43562533 | 43562870 |
| chr10 | 43562897 | 43563283 |
| chr10 | 43577700 | 43577990 |
| chr10 | 43578318 | 43578901 |
| chr10 | 43578901 | 43579379 |
| chr10 | 43579379 | 43579741 |
| chr10 | 43579741 | 43580023 |
| chr10 | 43580081 | 43580231 |
| chr10 | 43580861 | 43581086 |
| chr10 | 43591036 | 43591373 |



|       |          |          |
|-------|----------|----------|
| chr10 | 43593615 | 43593848 |
| chr10 | 43604407 | 43604761 |
| chr10 | 43604761 | 43605124 |
| chr10 | 43605124 | 43605342 |
| chr10 | 43610141 | 43610306 |
| chr10 | 43622624 | 43622794 |
| chr10 | 43634476 | 43634694 |
| chr10 | 43641123 | 43641417 |
| chr10 | 43651536 | 43651875 |
| chr10 | 43657471 | 43658087 |
| chr10 | 43679615 | 43679871 |
| chr10 | 43684238 | 43684574 |
| chr10 | 43688342 | 43688592 |
| chr10 | 43688960 | 43689145 |
| chr10 | 43689261 | 43689584 |
| chr10 | 43689752 | 43689982 |
| chr10 | 43689982 | 43690300 |
| chr10 | 43691752 | 43692013 |
| chr10 | 43694022 | 43694321 |
| chr10 | 43694519 | 43694768 |
| chr10 | 43701078 | 43701287 |
| chr10 | 43718815 | 43719199 |
| chr10 | 43723323 | 43723774 |
| chr10 | 43790919 | 43791085 |
| chr10 | 43856052 | 43856238 |
| chr10 | 43856381 | 43856868 |
| chr10 | 43870839 | 43870993 |
| chr10 | 43871539 | 43871824 |
| chr10 | 43901244 | 43902096 |
| chr10 | 43919027 | 43919279 |
| chr10 | 43943267 | 43943780 |
| chr10 | 43943780 | 43944146 |
| chr10 | 43944922 | 43945136 |
| chr10 | 43953958 | 43954370 |
| chr10 | 43954455 | 43954740 |
| chr10 | 43957848 | 43958058 |
| chr10 | 43960401 | 43960698 |
| chr10 | 43973050 | 43973657 |
| chr10 | 43977374 | 43977705 |
| chr10 | 43980068 | 43980284 |
| chr10 | 43980837 | 43981049 |
| chr10 | 43982900 | 43983211 |

|       |          |          |
|-------|----------|----------|
| chr10 | 43990899 | 43991119 |
| chr10 | 43991373 | 43991524 |
| chr10 | 43998440 | 43999004 |
| chr10 | 44002665 | 44002872 |
| chr10 | 44003586 | 44003768 |
| chr10 | 44003834 | 44004055 |
| chr10 | 44004137 | 44004347 |
| chr10 | 44004347 | 44004715 |
| chr10 | 44005632 | 44006013 |
| chr10 | 44006036 | 44006321 |
| chr10 | 44006321 | 44006673 |
| chr10 | 44015386 | 44015675 |
| chr10 | 44015675 | 44015974 |
| chr10 | 44016072 | 44016315 |
| chr10 | 44016315 | 44016822 |
| chr10 | 44024657 | 44025043 |
| chr10 | 44026134 | 44026416 |
| chr10 | 44030145 | 44030788 |
| chr10 | 44037921 | 44038212 |
| chr10 | 44038261 | 44038490 |
| chr10 | 44039201 | 44039554 |
| chr10 | 44043611 | 44043889 |
| chr10 | 44043889 | 44044325 |
| chr10 | 44050144 | 44050438 |
| chr10 | 44054485 | 44054653 |
| chr10 | 44066091 | 44066257 |
| chr10 | 44071022 | 44071612 |
| chr10 | 44078715 | 44079153 |
| chr10 | 44079153 | 44079519 |
| chr10 | 44079528 | 44079737 |
| chr10 | 44084404 | 44084643 |
| chr10 | 44094464 | 44094778 |
| chr10 | 44094778 | 44095217 |
| chr10 | 44106567 | 44106777 |
| chr10 | 44111994 | 44112315 |
| chr10 | 44112315 | 44112564 |
| chr10 | 44112906 | 44113179 |
| chr10 | 44120528 | 44120678 |
| chr10 | 44129952 | 44130200 |
| chr10 | 44136685 | 44136852 |
| chr10 | 44142200 | 44142399 |
| chr10 | 44148773 | 44149192 |

|       |          |          |
|-------|----------|----------|
| chr10 | 44150500 | 44151223 |
| chr10 | 44160133 | 44160403 |
| chr10 | 44171733 | 44172132 |
| chr10 | 44176050 | 44176539 |
| chr10 | 44176601 | 44177171 |
| chr10 | 44177369 | 44177671 |
| chr10 | 44192203 | 44192584 |
| chr10 | 44209018 | 44209238 |
| chr10 | 44219194 | 44219380 |
| chr10 | 44233436 | 44233657 |
| chr10 | 44258749 | 44258984 |
| chr10 | 44266660 | 44266870 |
| chr10 | 44267784 | 44268089 |
| chr10 | 44268130 | 44268565 |
| chr10 | 44268565 | 44268840 |
| chr10 | 44284263 | 44284528 |
| chr10 | 44316331 | 44316649 |
| chr10 | 44323441 | 44323695 |
| chr10 | 44390399 | 44390557 |
| chr10 | 44400587 | 44400873 |
| chr10 | 44409851 | 44410042 |
| chr10 | 44420297 | 44420483 |
| chr10 | 44421415 | 44421565 |
| chr10 | 44424962 | 44425370 |
| chr10 | 44425370 | 44425620 |
| chr10 | 44425767 | 44425947 |
| chr10 | 44427958 | 44428422 |
| chr10 | 44431767 | 44432023 |
| chr10 | 44440328 | 44440479 |
| chr10 | 44458475 | 44458949 |
| chr10 | 44462543 | 44462783 |
| chr10 | 44518523 | 44519365 |
| chr10 | 44520122 | 44520437 |
| chr10 | 44529171 | 44529660 |
| chr10 | 44529660 | 44529889 |
| chr10 | 44529947 | 44530170 |
| chr10 | 44541295 | 44541597 |
| chr10 | 44556952 | 44557181 |
| chr10 | 44564727 | 44565002 |
| chr10 | 44565032 | 44565456 |
| chr10 | 44566013 | 44566389 |
| chr10 | 44574513 | 44575000 |

|       |          |          |
|-------|----------|----------|
| chr10 | 44575000 | 44575258 |
| chr10 | 44607371 | 44607749 |
| chr10 | 44615672 | 44615876 |
| chr10 | 44657130 | 44657318 |
| chr10 | 44676582 | 44676844 |
| chr10 | 44685239 | 44685611 |
| chr10 | 44691505 | 44691977 |
| chr10 | 44698607 | 44698809 |
| chr10 | 44700087 | 44700732 |
| chr10 | 44715953 | 44716276 |
| chr10 | 44716276 | 44716518 |
| chr10 | 44716790 | 44716966 |
| chr10 | 44716976 | 44717565 |
| chr10 | 44723292 | 44723634 |
| chr10 | 44730209 | 44730398 |
| chr10 | 44730823 | 44731077 |
| chr10 | 44731077 | 44731282 |
| chr10 | 44733671 | 44733989 |
| chr10 | 44744283 | 44744551 |
| chr10 | 44745145 | 44745424 |
| chr10 | 44745673 | 44745937 |
| chr10 | 44747478 | 44747816 |
| chr10 | 44749180 | 44749594 |
| chr10 | 44754769 | 44755000 |
| chr10 | 44755000 | 44755314 |
| chr10 | 44755314 | 44755885 |
| chr10 | 44818529 | 44818931 |
| chr10 | 44875465 | 44875722 |
| chr10 | 44877013 | 44877404 |
| chr10 | 44877404 | 44877797 |
| chr10 | 44883987 | 44884539 |
| chr10 | 44884547 | 44884791 |
| chr10 | 44887265 | 44887970 |
| chr10 | 44914450 | 44914735 |
| chr10 | 44916987 | 44917153 |
| chr10 | 44932423 | 44932591 |
| chr10 | 44986956 | 44987245 |
| chr10 | 44987245 | 44987575 |
| chr10 | 44988844 | 44989140 |
| chr10 | 45000874 | 45001305 |
| chr10 | 45010657 | 45010815 |
| chr10 | 45019477 | 45019697 |

|       |          |          |
|-------|----------|----------|
| chr10 | 45045357 | 45045577 |
| chr10 | 45048380 | 45048530 |
| chr10 | 45048580 | 45049157 |
| chr10 | 45051153 | 45051468 |
| chr10 | 45066249 | 45066435 |
| chr10 | 45066679 | 45067342 |
| chr10 | 45067342 | 45067717 |
| chr10 | 45067722 | 45067969 |
| chr10 | 45082828 | 45082994 |
| chr10 | 45086742 | 45086892 |
| chr10 | 45115942 | 45116102 |
| chr10 | 45132471 | 45132682 |
| chr10 | 45156028 | 45156181 |
| chr10 | 45161835 | 45162047 |
| chr10 | 45180762 | 45180963 |
| chr10 | 45286311 | 45286494 |
| chr10 | 45289273 | 45289501 |
| chr10 | 45292338 | 45292528 |
| chr10 | 45295183 | 45295349 |
| chr10 | 45303393 | 45303605 |
| chr10 | 45373350 | 45373588 |
| chr10 | 45395580 | 45395768 |
| chr10 | 45398122 | 45398628 |
| chr10 | 45485647 | 45485923 |
| chr10 | 45485923 | 45486244 |
| chr10 | 45486244 | 45486626 |
| chr10 | 45486626 | 45486952 |
| chr10 | 45546858 | 45547043 |
| chr10 | 45577659 | 45577966 |
| chr10 | 45577966 | 45578228 |
| chr10 | 45578228 | 45578561 |
| chr10 | 45578561 | 45578861 |
| chr10 | 45640556 | 45641113 |
| chr10 | 45734692 | 45734861 |
| chr10 | 45734932 | 45735197 |
| chr10 | 45761242 | 45761485 |
| chr10 | 45766924 | 45767172 |
| chr10 | 45874519 | 45874812 |
| chr10 | 45875301 | 45875596 |
| chr10 | 45883793 | 45884107 |
| chr10 | 45888698 | 45889205 |
| chr10 | 45889408 | 45889578 |

|       |          |          |
|-------|----------|----------|
| chr10 | 45933728 | 45933981 |
| chr10 | 46011994 | 46012266 |
| chr10 | 46228244 | 46228446 |
| chr10 | 46228446 | 46228712 |
| chr10 | 46228712 | 46229010 |
| chr10 | 46229010 | 46229292 |
| chr10 | 46298324 | 46298689 |
| chr10 | 46320273 | 46320542 |
| chr10 | 46323617 | 46323782 |
| chr10 | 46539578 | 46539842 |
| chr10 | 46665497 | 46665740 |
| chr10 | 46689881 | 46690220 |
| chr10 | 46708226 | 46708509 |
| chr10 | 46723733 | 46723979 |
| chr10 | 46785316 | 46785551 |
| chr10 | 46785558 | 46786257 |
| chr10 | 46791921 | 46792479 |
| chr10 | 46939436 | 46939586 |
| chr10 | 47402137 | 47402422 |
| chr10 | 47452270 | 47452607 |
| chr10 | 47455213 | 47455740 |
| chr10 | 47456293 | 47456610 |
| chr10 | 47590820 | 47590973 |
| chr10 | 48067021 | 48067490 |
| chr10 | 48178169 | 48178406 |
| chr10 | 48433364 | 48433693 |
| chr10 | 48549782 | 48550109 |
| chr10 | 48556216 | 48556452 |
| chr10 | 48627621 | 48627904 |
| chr10 | 48770015 | 48770404 |
| chr10 | 49050382 | 49050648 |
| chr10 | 50419935 | 50420144 |
| chr10 | 50427279 | 50427478 |
| chr10 | 50584658 | 50585153 |
| chr10 | 50586587 | 50586914 |
| chr10 | 50592334 | 50592804 |
| chr10 | 50592804 | 50593288 |
| chr10 | 50624603 | 50625055 |
| chr10 | 50657419 | 50657650 |
| chr10 | 50704330 | 50704492 |
| chr10 | 50800148 | 50800376 |
| chr10 | 50892891 | 50893041 |

|       |          |          |
|-------|----------|----------|
| chr10 | 50894219 | 50894462 |
| chr10 | 50894462 | 50894764 |
| chr10 | 50894764 | 50895080 |
| chr10 | 50895080 | 50895358 |
| chr10 | 50898332 | 50898517 |
| chr10 | 50910542 | 50910750 |
| chr10 | 51405241 | 51405460 |
| chr10 | 51414598 | 51414768 |
| chr10 | 51416683 | 51417036 |
| chr10 | 51417263 | 51417587 |
| chr10 | 51418032 | 51418341 |
| chr10 | 51421542 | 51421717 |
| chr10 | 51451637 | 51452014 |
| chr10 | 51454064 | 51454346 |
| chr10 | 51454408 | 51454777 |
| chr10 | 51454777 | 51455086 |
| chr10 | 51521623 | 51522024 |
| chr10 | 51529639 | 51529863 |
| chr10 | 51553407 | 51553679 |
| chr10 | 51553792 | 51554019 |
| chr10 | 51571266 | 51571641 |
| chr10 | 51571641 | 51572014 |
| chr10 | 51595253 | 51595410 |
| chr10 | 51650824 | 51650992 |
| chr10 | 51677555 | 51677837 |
| chr10 | 51677837 | 51678079 |
| chr10 | 51789305 | 51789594 |
| chr10 | 51940379 | 51940529 |
| chr10 | 51944520 | 51944853 |
| chr10 | 51946228 | 51946550 |
| chr10 | 51946603 | 51946931 |
| chr10 | 51946931 | 51947283 |
| chr10 | 51950094 | 51950339 |
| chr10 | 51961573 | 51961733 |
| chr10 | 51975138 | 51975491 |
| chr10 | 51975491 | 51975806 |
| chr10 | 51975982 | 51976278 |
| chr10 | 52022113 | 52022263 |
| chr10 | 52022343 | 52022597 |
| chr10 | 52022597 | 52023048 |
| chr10 | 52027344 | 52028062 |
| chr10 | 52029808 | 52029997 |

|       |          |          |
|-------|----------|----------|
| chr10 | 52031760 | 52031923 |
| chr10 | 52072587 | 52072795 |
| chr10 | 52106281 | 52106464 |
| chr10 | 52142144 | 52142561 |
| chr10 | 52144319 | 52144906 |
| chr10 | 52145139 | 52145371 |
| chr10 | 52170544 | 52170842 |
| chr10 | 52174404 | 52174760 |
| chr10 | 52205500 | 52205866 |
| chr10 | 52216853 | 52217099 |
| chr10 | 52219687 | 52219937 |
| chr10 | 52219984 | 52220234 |
| chr10 | 52233266 | 52233504 |
| chr10 | 52233504 | 52233754 |
| chr10 | 52233754 | 52233987 |
| chr10 | 52233987 | 52234340 |
| chr10 | 52273023 | 52273391 |
| chr10 | 52277356 | 52277628 |
| chr10 | 52277628 | 52277885 |
| chr10 | 52277944 | 52278228 |
| chr10 | 52278228 | 52278560 |
| chr10 | 52342785 | 52343068 |
| chr10 | 52343313 | 52343559 |
| chr10 | 52381357 | 52381542 |
| chr10 | 52381560 | 52381784 |
| chr10 | 52381799 | 52382335 |
| chr10 | 52382335 | 52382877 |
| chr10 | 52392380 | 52392546 |
| chr10 | 52399779 | 52400104 |
| chr10 | 52417185 | 52417657 |
| chr10 | 52417657 | 52418034 |
| chr10 | 52418034 | 52418373 |
| chr10 | 52419034 | 52419235 |
| chr10 | 52528369 | 52528522 |
| chr10 | 52528937 | 52529128 |
| chr10 | 52529580 | 52529730 |
| chr10 | 52690288 | 52690620 |
| chr10 | 52690620 | 52690960 |
| chr10 | 52690960 | 52691241 |
| chr10 | 52691241 | 52691466 |
| chr10 | 52896719 | 52897123 |
| chr10 | 52934701 | 52934956 |



|       |          |          |
|-------|----------|----------|
| chr10 | 53129489 | 53129810 |
| chr10 | 53271294 | 53271492 |
| chr10 | 53348398 | 53348714 |
| chr10 | 53355409 | 53355713 |
| chr10 | 53379129 | 53379734 |
| chr10 | 53379734 | 53380240 |
| chr10 | 53395038 | 53395251 |
| chr10 | 53395260 | 53395859 |
| chr10 | 53413010 | 53413189 |
| chr10 | 53419120 | 53419469 |
| chr10 | 53428747 | 53429019 |
| chr10 | 53466916 | 53467166 |
| chr10 | 53509239 | 53509398 |
| chr10 | 53528480 | 53528693 |
| chr10 | 53540617 | 53540777 |
| chr10 | 53596525 | 53597102 |
| chr10 | 53597102 | 53597516 |
| chr10 | 53597516 | 53597872 |
| chr10 | 53598943 | 53599176 |
| chr10 | 53629296 | 53629722 |
| chr10 | 53629722 | 53630086 |
| chr10 | 53630086 | 53630349 |
| chr10 | 53641597 | 53641790 |
| chr10 | 53651769 | 53651935 |
| chr10 | 53653035 | 53653187 |
| chr10 | 53711187 | 53711340 |
| chr10 | 53718327 | 53718477 |
| chr10 | 53718929 | 53719201 |
| chr10 | 53749968 | 53750410 |
| chr10 | 53750410 | 53750649 |
| chr10 | 53750649 | 53750994 |
| chr10 | 53750994 | 53751630 |
| chr10 | 53753135 | 53753368 |
| chr10 | 53755577 | 53755761 |
| chr10 | 53765506 | 53765864 |
| chr10 | 53806776 | 53806941 |
| chr10 | 53863492 | 53863775 |
| chr10 | 53959831 | 53960127 |
| chr10 | 54019342 | 54019510 |
| chr10 | 54026613 | 54026890 |
| chr10 | 54026890 | 54027272 |
| chr10 | 54032323 | 54032900 |

|       |          |          |
|-------|----------|----------|
| chr10 | 54040212 | 54040649 |
| chr10 | 54040716 | 54041006 |
| chr10 | 54049381 | 54049850 |
| chr10 | 54058666 | 54058816 |
| chr10 | 54058934 | 54059528 |
| chr10 | 54066803 | 54067002 |
| chr10 | 54073859 | 54074184 |
| chr10 | 54074352 | 54074573 |
| chr10 | 54074656 | 54074896 |
| chr10 | 54074988 | 54075384 |
| chr10 | 54075388 | 54076163 |
| chr10 | 54076547 | 54076784 |
| chr10 | 54085200 | 54085352 |
| chr10 | 54087353 | 54087754 |
| chr10 | 54099959 | 54100510 |
| chr10 | 54101746 | 54101978 |
| chr10 | 54117757 | 54118226 |
| chr10 | 54118571 | 54118823 |
| chr10 | 54197286 | 54197700 |
| chr10 | 54197700 | 54197973 |
| chr10 | 54202482 | 54202632 |
| chr10 | 54341059 | 54341400 |
| chr10 | 54350482 | 54350726 |
| chr10 | 54351172 | 54351399 |
| chr10 | 54369144 | 54369499 |
| chr10 | 54369499 | 54369734 |
| chr10 | 54371327 | 54371558 |
| chr10 | 54371558 | 54371864 |
| chr10 | 54478083 | 54478308 |
| chr10 | 54482914 | 54483217 |
| chr10 | 54606772 | 54607042 |
| chr10 | 54629672 | 54629880 |
| chr10 | 54659258 | 54659505 |
| chr10 | 54814451 | 54814667 |
| chr10 | 54814670 | 54814937 |
| chr10 | 54839044 | 54839377 |
| chr10 | 54839542 | 54839981 |
| chr10 | 55033966 | 55034181 |
| chr10 | 55051187 | 55051398 |
| chr10 | 55198418 | 55198650 |
| chr10 | 55198650 | 55198902 |
| chr10 | 55257362 | 55257661 |

|       |          |          |
|-------|----------|----------|
| chr10 | 55264869 | 55265050 |
| chr10 | 55265172 | 55265349 |
| chr10 | 55284950 | 55285249 |
| chr10 | 55290704 | 55290871 |
| chr10 | 55333813 | 55334311 |
| chr10 | 55335932 | 55336376 |
| chr10 | 55345801 | 55346027 |
| chr10 | 55348123 | 55348310 |
| chr10 | 55461863 | 55462337 |
| chr10 | 55471032 | 55471216 |
| chr10 | 55522771 | 55523052 |
| chr10 | 55564983 | 55565313 |
| chr10 | 55572746 | 55573090 |
| chr10 | 55779686 | 55779836 |
| chr10 | 55905972 | 55906267 |
| chr10 | 55926787 | 55927053 |
| chr10 | 55927053 | 55927318 |
| chr10 | 55927866 | 55928124 |
| chr10 | 55928200 | 55928527 |
| chr10 | 55980219 | 55980435 |
| chr10 | 56158935 | 56159163 |
| chr10 | 56163025 | 56163213 |
| chr10 | 56227984 | 56228138 |
| chr10 | 56228497 | 56228853 |
| chr10 | 56228853 | 56229146 |
| chr10 | 56229485 | 56229638 |
| chr10 | 56314360 | 56314515 |
| chr10 | 56339181 | 56339421 |
| chr10 | 56365917 | 56366187 |
| chr10 | 56369134 | 56369464 |
| chr10 | 56377029 | 56377529 |
| chr10 | 56377809 | 56377986 |
| chr10 | 56377986 | 56378226 |
| chr10 | 56378317 | 56378491 |
| chr10 | 56378594 | 56378899 |
| chr10 | 56378899 | 56379363 |
| chr10 | 56426485 | 56426756 |
| chr10 | 56440849 | 56441006 |
| chr10 | 56453750 | 56453993 |
| chr10 | 56468604 | 56468822 |
| chr10 | 56469054 | 56469253 |
| chr10 | 56486387 | 56487050 |

|       |          |          |
|-------|----------|----------|
| chr10 | 56499213 | 56499389 |
| chr10 | 56535340 | 56535694 |
| chr10 | 56560657 | 56560807 |
| chr10 | 56582020 | 56582570 |
| chr10 | 56598188 | 56598544 |
| chr10 | 56611575 | 56611896 |
| chr10 | 56611896 | 56612181 |
| chr10 | 56685942 | 56686194 |
| chr10 | 56694360 | 56694624 |
| chr10 | 56766167 | 56766494 |
| chr10 | 56769006 | 56769253 |
| chr10 | 56781873 | 56782152 |
| chr10 | 56782212 | 56782638 |
| chr10 | 56782710 | 56783078 |
| chr10 | 56783103 | 56783301 |
| chr10 | 56783674 | 56783852 |
| chr10 | 56783906 | 56784286 |
| chr10 | 56910846 | 56911174 |
| chr10 | 56912805 | 56913067 |
| chr10 | 56914149 | 56914367 |
| chr10 | 56935115 | 56935726 |
| chr10 | 56944629 | 56945174 |
| chr10 | 56945177 | 56945443 |
| chr10 | 56949201 | 56949380 |
| chr10 | 56949394 | 56949794 |
| chr10 | 56956249 | 56956620 |
| chr10 | 56956664 | 56957132 |
| chr10 | 56963290 | 56963606 |
| chr10 | 56965552 | 56965790 |
| chr10 | 56980821 | 56981333 |
| chr10 | 56981478 | 56981639 |
| chr10 | 56985640 | 56985908 |
| chr10 | 56988740 | 56989198 |
| chr10 | 56994996 | 56995518 |
| chr10 | 57001377 | 57001687 |
| chr10 | 57160541 | 57160912 |
| chr10 | 57411132 | 57411389 |
| chr10 | 57437955 | 57438127 |
| chr10 | 57438300 | 57438468 |
| chr10 | 57441167 | 57441359 |
| chr10 | 57445140 | 57445290 |
| chr10 | 57448008 | 57448249 |

|       |          |          |
|-------|----------|----------|
| chr10 | 57448344 | 57448501 |
| chr10 | 57448546 | 57448780 |
| chr10 | 57463373 | 57463640 |
| chr10 | 57465808 | 57466109 |
| chr10 | 57485876 | 57486463 |
| chr10 | 57486463 | 57487039 |
| chr10 | 57491688 | 57491838 |
| chr10 | 57499755 | 57500066 |
| chr10 | 57500566 | 57500768 |
| chr10 | 57501425 | 57501636 |
| chr10 | 57522895 | 57523104 |
| chr10 | 57530583 | 57530844 |
| chr10 | 57532000 | 57532712 |
| chr10 | 57571292 | 57571508 |
| chr10 | 57615399 | 57615583 |
| chr10 | 57631944 | 57632199 |
| chr10 | 57644337 | 57645076 |
| chr10 | 57670058 | 57670495 |
| chr10 | 57671551 | 57671767 |
| chr10 | 57743803 | 57743982 |
| chr10 | 57763059 | 57763394 |
| chr10 | 57794569 | 57795239 |
| chr10 | 57799534 | 57799791 |
| chr10 | 57822541 | 57822730 |
| chr10 | 57841999 | 57842155 |
| chr10 | 57846157 | 57846359 |
| chr10 | 58221419 | 58221656 |
| chr10 | 58221656 | 58221928 |
| chr10 | 58221928 | 58222185 |
| chr10 | 58223131 | 58223476 |
| chr10 | 58223894 | 58224181 |
| chr10 | 58224279 | 58224532 |
| chr10 | 58224532 | 58224833 |
| chr10 | 58224869 | 58225180 |
| chr10 | 58225180 | 58225650 |
| chr10 | 58227958 | 58228076 |
| chr10 | 58228076 | 58228136 |
| chr10 | 58231224 | 58231647 |
| chr10 | 58231732 | 58232075 |
| chr10 | 58232075 | 58232349 |
| chr10 | 58232349 | 58232631 |
| chr10 | 58232631 | 58232908 |

|       |          |          |
|-------|----------|----------|
| chr10 | 58233274 | 58233715 |
| chr10 | 58233715 | 58234045 |
| chr10 | 58238471 | 58238623 |
| chr10 | 58239068 | 58239369 |
| chr10 | 58239369 | 58239789 |
| chr10 | 58255241 | 58255558 |
| chr10 | 58255558 | 58255940 |
| chr10 | 58262972 | 58263137 |
| chr10 | 58281624 | 58281905 |
| chr10 | 58310498 | 58311235 |
| chr10 | 58320937 | 58321139 |
| chr10 | 58322820 | 58323172 |
| chr10 | 58323172 | 58323443 |
| chr10 | 58323443 | 58323933 |
| chr10 | 58330732 | 58330961 |
| chr10 | 58331792 | 58332075 |
| chr10 | 58333339 | 58333916 |
| chr10 | 58346574 | 58346794 |
| chr10 | 58347122 | 58347581 |
| chr10 | 58351410 | 58351983 |
| chr10 | 58354576 | 58354732 |
| chr10 | 58354732 | 58354899 |
| chr10 | 58355352 | 58355660 |
| chr10 | 58359207 | 58359425 |
| chr10 | 58360680 | 58360979 |
| chr10 | 58362849 | 58363039 |
| chr10 | 58364782 | 58365120 |
| chr10 | 58365120 | 58365633 |
| chr10 | 58370603 | 58370847 |
| chr10 | 58371264 | 58371539 |
| chr10 | 58371539 | 58371924 |
| chr10 | 58377868 | 58378123 |
| chr10 | 58378501 | 58378711 |
| chr10 | 58400900 | 58401138 |
| chr10 | 58401938 | 58402149 |
| chr10 | 58405266 | 58405852 |
| chr10 | 58405908 | 58406285 |
| chr10 | 58408353 | 58408517 |
| chr10 | 58441604 | 58441793 |
| chr10 | 58446372 | 58446567 |
| chr10 | 58446584 | 58447105 |
| chr10 | 58447105 | 58447515 |

|       |          |          |
|-------|----------|----------|
| chr10 | 58452849 | 58453016 |
| chr10 | 58460041 | 58460194 |
| chr10 | 58497435 | 58497783 |
| chr10 | 58497783 | 58498043 |
| chr10 | 58498043 | 58498347 |
| chr10 | 58559191 | 58559432 |
| chr10 | 58559876 | 58560300 |
| chr10 | 58604792 | 58605145 |
| chr10 | 58608895 | 58609156 |
| chr10 | 58609363 | 58609740 |
| chr10 | 58627649 | 58627929 |
| chr10 | 58651246 | 58651612 |
| chr10 | 58673601 | 58673765 |
| chr10 | 58675446 | 58675899 |
| chr10 | 58812136 | 58812410 |
| chr10 | 58812410 | 58812896 |
| chr10 | 58812896 | 58813414 |
| chr10 | 58813501 | 58813909 |
| chr10 | 59078046 | 59078232 |
| chr10 | 59090353 | 59090503 |
| chr10 | 59109068 | 59109386 |
| chr10 | 59114457 | 59114788 |
| chr10 | 59115092 | 59115242 |
| chr10 | 59149916 | 59150169 |
| chr10 | 59150188 | 59150445 |
| chr10 | 59152589 | 59153000 |
| chr10 | 59166625 | 59166861 |
| chr10 | 59175264 | 59175613 |
| chr10 | 59195037 | 59195187 |
| chr10 | 59221205 | 59221437 |
| chr10 | 59221437 | 59221722 |
| chr10 | 59221722 | 59222158 |
| chr10 | 59222158 | 59222617 |
| chr10 | 59222778 | 59222928 |
| chr10 | 59225194 | 59225401 |
| chr10 | 59241072 | 59241696 |
| chr10 | 59250760 | 59250974 |
| chr10 | 59250974 | 59251198 |
| chr10 | 59261764 | 59261918 |
| chr10 | 59265866 | 59266430 |
| chr10 | 59266430 | 59266673 |
| chr10 | 59283929 | 59284140 |

|       |          |          |
|-------|----------|----------|
| chr10 | 59285680 | 59285846 |
| chr10 | 59289087 | 59289414 |
| chr10 | 59292541 | 59292923 |
| chr10 | 59295234 | 59295568 |
| chr10 | 59295568 | 59295848 |
| chr10 | 59296117 | 59296643 |
| chr10 | 59309124 | 59309331 |
| chr10 | 59309391 | 59309677 |
| chr10 | 59311161 | 59311349 |
| chr10 | 59322995 | 59323540 |
| chr10 | 59323540 | 59323949 |
| chr10 | 59323952 | 59324165 |
| chr10 | 59380661 | 59380863 |
| chr10 | 59381713 | 59382045 |
| chr10 | 59382828 | 59383143 |
| chr10 | 59383143 | 59383417 |
| chr10 | 59386707 | 59386925 |
| chr10 | 59395580 | 59395776 |
| chr10 | 59425243 | 59425758 |
| chr10 | 59430394 | 59431318 |
| chr10 | 59431339 | 59431531 |
| chr10 | 59449668 | 59449852 |
| chr10 | 59451856 | 59452228 |
| chr10 | 59453014 | 59453194 |
| chr10 | 59453616 | 59453910 |
| chr10 | 59453989 | 59454225 |
| chr10 | 59464128 | 59464349 |
| chr10 | 59464417 | 59464622 |
| chr10 | 59476452 | 59476718 |
| chr10 | 59508201 | 59508478 |
| chr10 | 59509113 | 59509926 |
| chr10 | 59514718 | 59515101 |
| chr10 | 59527393 | 59527545 |
| chr10 | 59536272 | 59536622 |
| chr10 | 59537438 | 59537930 |
| chr10 | 59537930 | 59538183 |
| chr10 | 59539502 | 59539753 |
| chr10 | 59556988 | 59557155 |
| chr10 | 59557327 | 59557707 |
| chr10 | 59559036 | 59559189 |
| chr10 | 59564414 | 59564668 |
| chr10 | 59564668 | 59565022 |



|       |          |          |
|-------|----------|----------|
| chr10 | 59577806 | 59578104 |
| chr10 | 59578104 | 59578451 |
| chr10 | 59578451 | 59578774 |
| chr10 | 59578774 | 59578991 |
| chr10 | 59579467 | 59579693 |
| chr10 | 59579747 | 59580016 |
| chr10 | 59580563 | 59580845 |
| chr10 | 59586909 | 59587358 |
| chr10 | 59587753 | 59587939 |
| chr10 | 59589481 | 59589651 |
| chr10 | 59589946 | 59590160 |
| chr10 | 59593864 | 59594739 |
| chr10 | 59594964 | 59595157 |
| chr10 | 59603900 | 59604162 |
| chr10 | 59609227 | 59609430 |
| chr10 | 59615947 | 59616215 |
| chr10 | 59616215 | 59616534 |
| chr10 | 59616534 | 59617061 |
| chr10 | 59621360 | 59621644 |
| chr10 | 59623014 | 59623211 |
| chr10 | 59624574 | 59624776 |
| chr10 | 59636112 | 59636368 |
| chr10 | 59636772 | 59636981 |
| chr10 | 59638635 | 59638996 |
| chr10 | 59641950 | 59642279 |
| chr10 | 59642408 | 59642706 |
| chr10 | 59642706 | 59643081 |
| chr10 | 59643357 | 59643531 |
| chr10 | 59651599 | 59652096 |
| chr10 | 59667229 | 59667863 |
| chr10 | 59682454 | 59682702 |
| chr10 | 59685437 | 59685591 |
| chr10 | 59685704 | 59686032 |
| chr10 | 59686470 | 59686632 |
| chr10 | 59702225 | 59703073 |
| chr10 | 59710365 | 59710628 |
| chr10 | 59715021 | 59715410 |
| chr10 | 59724420 | 59724591 |
| chr10 | 59724602 | 59725042 |
| chr10 | 59733364 | 59733625 |
| chr10 | 59741175 | 59741372 |
| chr10 | 59741498 | 59741716 |

|       |          |          |
|-------|----------|----------|
| chr10 | 59777125 | 59777773 |
| chr10 | 59781643 | 59781824 |
| chr10 | 59792025 | 59792348 |
| chr10 | 59799245 | 59799689 |
| chr10 | 59800145 | 59800537 |
| chr10 | 59810053 | 59810269 |
| chr10 | 59811090 | 59811467 |
| chr10 | 59814887 | 59815145 |
| chr10 | 59817243 | 59817433 |
| chr10 | 59817622 | 59817852 |
| chr10 | 59818557 | 59818754 |
| chr10 | 59820953 | 59821227 |
| chr10 | 59821272 | 59821710 |
| chr10 | 59821744 | 59821902 |
| chr10 | 59825483 | 59825870 |
| chr10 | 59836720 | 59837145 |
| chr10 | 59837528 | 59837830 |
| chr10 | 59857304 | 59857491 |
| chr10 | 59860744 | 59860923 |
| chr10 | 59861814 | 59862010 |
| chr10 | 59865080 | 59865401 |
| chr10 | 59870230 | 59870509 |
| chr10 | 59873341 | 59873517 |
| chr10 | 59873771 | 59873978 |
| chr10 | 59878894 | 59879118 |
| chr10 | 59879174 | 59879732 |
| chr10 | 59879732 | 59880024 |
| chr10 | 59880024 | 59880244 |
| chr10 | 59884740 | 59885370 |
| chr10 | 59893092 | 59893299 |
| chr10 | 59894874 | 59895115 |
| chr10 | 59899303 | 59899962 |
| chr10 | 59899962 | 59900323 |
| chr10 | 59901187 | 59901337 |
| chr10 | 59907072 | 59907638 |
| chr10 | 59907696 | 59908088 |
| chr10 | 59908088 | 59908466 |
| chr10 | 59908962 | 59909323 |
| chr10 | 59909323 | 59909623 |
| chr10 | 59909623 | 59909944 |
| chr10 | 59914763 | 59914913 |
| chr10 | 59915820 | 59916084 |

|       |          |          |
|-------|----------|----------|
| chr10 | 59916670 | 59916843 |
| chr10 | 59918096 | 59918557 |
| chr10 | 59919551 | 59919765 |
| chr10 | 59920857 | 59921617 |
| chr10 | 59923587 | 59923742 |
| chr10 | 59932500 | 59932946 |
| chr10 | 59934074 | 59934279 |
| chr10 | 59938546 | 59938761 |
| chr10 | 59938973 | 59939484 |
| chr10 | 59942756 | 59942978 |
| chr10 | 59943030 | 59943451 |
| chr10 | 59943451 | 59943734 |
| chr10 | 59943734 | 59944036 |
| chr10 | 59948939 | 59949266 |
| chr10 | 59949288 | 59949621 |
| chr10 | 59950685 | 59950940 |
| chr10 | 59950940 | 59951153 |
| chr10 | 59951546 | 59952191 |
| chr10 | 59952230 | 59952392 |
| chr10 | 59964468 | 59964638 |
| chr10 | 59969800 | 59969985 |
| chr10 | 59977405 | 59977557 |
| chr10 | 59977746 | 59978054 |
| chr10 | 59978505 | 59978661 |
| chr10 | 59978849 | 59979205 |
| chr10 | 59979213 | 59979379 |
| chr10 | 59980598 | 59980976 |
| chr10 | 59997695 | 59997868 |
| chr10 | 60002559 | 60002915 |
| chr10 | 60002915 | 60003354 |
| chr10 | 60003354 | 60003717 |
| chr10 | 60021661 | 60021870 |
| chr10 | 60023848 | 60024080 |
| chr10 | 60026845 | 60027080 |
| chr10 | 60027735 | 60027894 |
| chr10 | 60028359 | 60028520 |
| chr10 | 60034562 | 60034920 |
| chr10 | 60046759 | 60046973 |
| chr10 | 60057688 | 60057873 |
| chr10 | 60064891 | 60065057 |
| chr10 | 60065394 | 60065618 |
| chr10 | 60065633 | 60065916 |

|       |          |          |
|-------|----------|----------|
| chr10 | 60066565 | 60066842 |
| chr10 | 60077254 | 60077516 |
| chr10 | 60078570 | 60078885 |
| chr10 | 60078983 | 60079274 |
| chr10 | 60086496 | 60086776 |
| chr10 | 60095555 | 60095800 |
| chr10 | 60106605 | 60106992 |
| chr10 | 60106992 | 60107218 |
| chr10 | 60107499 | 60107797 |
| chr10 | 60112598 | 60112775 |
| chr10 | 60124157 | 60124388 |
| chr10 | 60125717 | 60125974 |
| chr10 | 60125974 | 60126244 |
| chr10 | 60141678 | 60141846 |
| chr10 | 60147593 | 60147801 |
| chr10 | 60147970 | 60148120 |
| chr10 | 60148152 | 60148459 |
| chr10 | 60150986 | 60151188 |
| chr10 | 60158250 | 60158464 |
| chr10 | 60185227 | 60185425 |
| chr10 | 60186196 | 60186580 |
| chr10 | 60186580 | 60186818 |
| chr10 | 60186864 | 60187166 |
| chr10 | 60191351 | 60191506 |
| chr10 | 60191586 | 60192223 |
| chr10 | 60193476 | 60193641 |
| chr10 | 60193889 | 60194230 |
| chr10 | 60207206 | 60207611 |
| chr10 | 60209133 | 60209840 |
| chr10 | 60210431 | 60210796 |
| chr10 | 60218572 | 60219007 |
| chr10 | 60219007 | 60219277 |
| chr10 | 60237505 | 60237739 |
| chr10 | 60237841 | 60238078 |
| chr10 | 60243920 | 60244219 |
| chr10 | 60245046 | 60245459 |
| chr10 | 60246619 | 60246877 |
| chr10 | 60252318 | 60252694 |
| chr10 | 60262315 | 60262908 |
| chr10 | 60263443 | 60263711 |
| chr10 | 60269532 | 60270057 |
| chr10 | 60271779 | 60272050 |

|       |          |          |
|-------|----------|----------|
| chr10 | 60272050 | 60272285 |
| chr10 | 60272393 | 60272570 |
| chr10 | 60277301 | 60277752 |
| chr10 | 60277752 | 60278002 |
| chr10 | 60278002 | 60278244 |
| chr10 | 60278524 | 60278800 |
| chr10 | 60285765 | 60285985 |
| chr10 | 60287290 | 60287546 |
| chr10 | 60287546 | 60287964 |
| chr10 | 60290263 | 60290680 |
| chr10 | 60290680 | 60291066 |
| chr10 | 60304880 | 60305118 |
| chr10 | 60305118 | 60305339 |
| chr10 | 60305339 | 60305619 |
| chr10 | 60346734 | 60347060 |
| chr10 | 60347060 | 60347318 |
| chr10 | 60350870 | 60351092 |
| chr10 | 60351767 | 60352163 |
| chr10 | 60355333 | 60355612 |
| chr10 | 60379470 | 60379839 |
| chr10 | 60380409 | 60380745 |
| chr10 | 60395557 | 60396063 |
| chr10 | 60407929 | 60408235 |
| chr10 | 60408365 | 60408531 |
| chr10 | 60416589 | 60416821 |
| chr10 | 60416998 | 60417206 |
| chr10 | 60418185 | 60418427 |
| chr10 | 60420876 | 60421039 |
| chr10 | 60421645 | 60421923 |
| chr10 | 60445164 | 60445597 |
| chr10 | 60445761 | 60445912 |
| chr10 | 60531390 | 60531684 |
| chr10 | 60531704 | 60531859 |
| chr10 | 60532806 | 60532966 |
| chr10 | 60534280 | 60534541 |
| chr10 | 60569143 | 60569460 |
| chr10 | 60571236 | 60571713 |
| chr10 | 60573410 | 60573687 |
| chr10 | 60574928 | 60575078 |
| chr10 | 60578226 | 60578707 |
| chr10 | 60578707 | 60579153 |
| chr10 | 60584326 | 60584613 |

|       |          |          |
|-------|----------|----------|
| chr10 | 60616005 | 60616260 |
| chr10 | 60621602 | 60621787 |
| chr10 | 60635992 | 60636332 |
| chr10 | 60659961 | 60660116 |
| chr10 | 60668674 | 60668847 |
| chr10 | 60686831 | 60687215 |
| chr10 | 60687215 | 60687536 |
| chr10 | 60687545 | 60687868 |
| chr10 | 60696998 | 60697471 |
| chr10 | 60712355 | 60712592 |
| chr10 | 60723446 | 60723599 |
| chr10 | 60742407 | 60742558 |
| chr10 | 60744720 | 60744870 |
| chr10 | 60752102 | 60752386 |
| chr10 | 60752386 | 60752678 |
| chr10 | 60752678 | 60753159 |
| chr10 | 60760486 | 60760782 |
| chr10 | 60762030 | 60762522 |
| chr10 | 60762897 | 60763112 |
| chr10 | 60775542 | 60775795 |
| chr10 | 60778621 | 60778929 |
| chr10 | 60779564 | 60779958 |
| chr10 | 60779958 | 60780167 |
| chr10 | 60781659 | 60781843 |
| chr10 | 60785313 | 60785509 |
| chr10 | 60787907 | 60788104 |
| chr10 | 60790937 | 60791381 |
| chr10 | 60792119 | 60792349 |
| chr10 | 60796158 | 60796324 |
| chr10 | 60796573 | 60796816 |
| chr10 | 60807976 | 60808230 |
| chr10 | 60808304 | 60809006 |
| chr10 | 60814423 | 60814767 |
| chr10 | 60816874 | 60817332 |
| chr10 | 60817406 | 60817761 |
| chr10 | 60819233 | 60819496 |
| chr10 | 60820739 | 60820986 |
| chr10 | 60822627 | 60823168 |
| chr10 | 60825992 | 60826382 |
| chr10 | 60830523 | 60830673 |
| chr10 | 60830776 | 60830974 |
| chr10 | 60830974 | 60831314 |

|       |          |          |
|-------|----------|----------|
| chr10 | 60831314 | 60831813 |
| chr10 | 60832825 | 60833157 |
| chr10 | 60835040 | 60835277 |
| chr10 | 60845232 | 60845449 |
| chr10 | 60851607 | 60851757 |
| chr10 | 60876858 | 60877127 |
| chr10 | 60877127 | 60877413 |
| chr10 | 60877413 | 60877672 |
| chr10 | 60884880 | 60885260 |
| chr10 | 60885260 | 60885655 |
| chr10 | 60885655 | 60886049 |
| chr10 | 60886118 | 60886289 |
| chr10 | 60897132 | 60897371 |
| chr10 | 60900838 | 60901529 |
| chr10 | 60911507 | 60911708 |
| chr10 | 60914484 | 60914675 |
| chr10 | 60917525 | 60917774 |
| chr10 | 60925675 | 60925953 |
| chr10 | 60925953 | 60926164 |
| chr10 | 60926616 | 60926955 |
| chr10 | 60932968 | 60933191 |
| chr10 | 60933473 | 60933744 |
| chr10 | 60933835 | 60934228 |
| chr10 | 60934228 | 60934867 |
| chr10 | 60943164 | 60943371 |
| chr10 | 60949019 | 60949604 |
| chr10 | 60951914 | 60952099 |
| chr10 | 60955076 | 60955665 |
| chr10 | 60956420 | 60956636 |
| chr10 | 60967323 | 60967473 |
| chr10 | 60979856 | 60980028 |
| chr10 | 60985276 | 60985557 |
| chr10 | 61015844 | 61016013 |
| chr10 | 61016405 | 61016668 |
| chr10 | 61018063 | 61018250 |
| chr10 | 61023546 | 61023769 |
| chr10 | 61027509 | 61027681 |
| chr10 | 61027876 | 61028108 |
| chr10 | 61028539 | 61028947 |
| chr10 | 61045099 | 61045312 |
| chr10 | 61052101 | 61052306 |
| chr10 | 61052306 | 61052569 |

|       |          |          |
|-------|----------|----------|
| chr10 | 61063039 | 61063229 |
| chr10 | 61064737 | 61064894 |
| chr10 | 61068397 | 61068853 |
| chr10 | 61068928 | 61069083 |
| chr10 | 61069092 | 61069615 |
| chr10 | 61072426 | 61072680 |
| chr10 | 61079371 | 61079688 |
| chr10 | 61080315 | 61080564 |
| chr10 | 61089123 | 61089490 |
| chr10 | 61089490 | 61089804 |
| chr10 | 61089804 | 61090119 |
| chr10 | 61114324 | 61114562 |
| chr10 | 61114562 | 61114768 |
| chr10 | 61114768 | 61115010 |
| chr10 | 61130918 | 61131313 |
| chr10 | 61131345 | 61131585 |
| chr10 | 61131585 | 61131820 |
| chr10 | 61134120 | 61134354 |
| chr10 | 61146137 | 61146383 |
| chr10 | 61146383 | 61146760 |
| chr10 | 61146760 | 61147123 |
| chr10 | 61147123 | 61147443 |
| chr10 | 61147443 | 61147727 |
| chr10 | 61147727 | 61148077 |
| chr10 | 61155673 | 61155834 |
| chr10 | 61157323 | 61157708 |
| chr10 | 61166818 | 61167081 |
| chr10 | 61169907 | 61170149 |
| chr10 | 61175637 | 61175846 |
| chr10 | 61175846 | 61176180 |
| chr10 | 61199576 | 61199971 |
| chr10 | 61201945 | 61202090 |
| chr10 | 61202090 | 61202255 |
| chr10 | 61211786 | 61212002 |
| chr10 | 61212921 | 61213239 |
| chr10 | 61213370 | 61213580 |
| chr10 | 61214538 | 61214906 |
| chr10 | 61258289 | 61258456 |
| chr10 | 61271842 | 61272126 |
| chr10 | 61272126 | 61272484 |
| chr10 | 61273122 | 61273485 |
| chr10 | 61275700 | 61275855 |



|       |          |          |
|-------|----------|----------|
| chr10 | 61275864 | 61276110 |
| chr10 | 61277142 | 61277292 |
| chr10 | 61277938 | 61278453 |
| chr10 | 61281216 | 61281428 |
| chr10 | 61285237 | 61285390 |
| chr10 | 61286115 | 61286330 |
| chr10 | 61286330 | 61286719 |
| chr10 | 61294332 | 61294554 |
| chr10 | 61317575 | 61317758 |
| chr10 | 61332620 | 61332836 |
| chr10 | 61336113 | 61336426 |
| chr10 | 61336455 | 61336607 |
| chr10 | 61339305 | 61339519 |
| chr10 | 61341528 | 61341833 |
| chr10 | 61344036 | 61344289 |
| chr10 | 61349479 | 61349635 |
| chr10 | 61360722 | 61360995 |
| chr10 | 61373966 | 61374162 |
| chr10 | 61375051 | 61375258 |
| chr10 | 61382517 | 61382722 |
| chr10 | 61382877 | 61383053 |
| chr10 | 61383053 | 61383284 |
| chr10 | 61383284 | 61383850 |
| chr10 | 61392511 | 61392806 |
| chr10 | 61394350 | 61394696 |
| chr10 | 61394696 | 61395069 |
| chr10 | 61399430 | 61399725 |
| chr10 | 61399728 | 61399894 |
| chr10 | 61413105 | 61413277 |
| chr10 | 61417491 | 61417692 |
| chr10 | 61418340 | 61418547 |
| chr10 | 61418551 | 61418701 |
| chr10 | 61418989 | 61419333 |
| chr10 | 61423272 | 61423499 |
| chr10 | 61423499 | 61423806 |
| chr10 | 61424667 | 61424822 |
| chr10 | 61445659 | 61445829 |
| chr10 | 61451421 | 61451643 |
| chr10 | 61451988 | 61452255 |
| chr10 | 61452255 | 61452607 |
| chr10 | 61452607 | 61453204 |
| chr10 | 61461778 | 61462086 |

|       |          |          |
|-------|----------|----------|
| chr10 | 61465006 | 61465389 |
| chr10 | 61467003 | 61467215 |
| chr10 | 61468683 | 61469200 |
| chr10 | 61475524 | 61475895 |
| chr10 | 61475895 | 61476439 |
| chr10 | 61479528 | 61479916 |
| chr10 | 61481873 | 61482182 |
| chr10 | 61486639 | 61486865 |
| chr10 | 61486969 | 61487392 |
| chr10 | 61488715 | 61488993 |
| chr10 | 61492077 | 61492548 |
| chr10 | 61502808 | 61502996 |
| chr10 | 61506324 | 61506710 |
| chr10 | 61509215 | 61509420 |
| chr10 | 61517120 | 61517308 |
| chr10 | 61535925 | 61536462 |
| chr10 | 61536462 | 61536726 |
| chr10 | 61536726 | 61537043 |
| chr10 | 61537060 | 61537368 |
| chr10 | 61544132 | 61544465 |
| chr10 | 61544487 | 61544950 |
| chr10 | 61569788 | 61570172 |
| chr10 | 61570172 | 61570559 |
| chr10 | 61583360 | 61583538 |
| chr10 | 61587350 | 61587500 |
| chr10 | 61595022 | 61595412 |
| chr10 | 61602350 | 61602601 |
| chr10 | 61602601 | 61602836 |
| chr10 | 61602836 | 61603078 |
| chr10 | 61605906 | 61606161 |
| chr10 | 61610862 | 61611182 |
| chr10 | 61617345 | 61617549 |
| chr10 | 61625507 | 61625689 |
| chr10 | 61625689 | 61625976 |
| chr10 | 61627096 | 61627334 |
| chr10 | 61627479 | 61627721 |
| chr10 | 61636937 | 61637424 |
| chr10 | 61637424 | 61637773 |
| chr10 | 61648331 | 61648789 |
| chr10 | 61648789 | 61649138 |
| chr10 | 61649138 | 61649523 |
| chr10 | 61654486 | 61654754 |

|       |          |          |
|-------|----------|----------|
| chr10 | 61654754 | 61655020 |
| chr10 | 61657750 | 61657923 |
| chr10 | 61658033 | 61658266 |
| chr10 | 61669881 | 61670410 |
| chr10 | 61670853 | 61671061 |
| chr10 | 61679992 | 61680382 |
| chr10 | 61680382 | 61680791 |
| chr10 | 61694921 | 61695077 |
| chr10 | 61695115 | 61695639 |
| chr10 | 61695639 | 61696049 |
| chr10 | 61696049 | 61696544 |
| chr10 | 61714877 | 61715562 |
| chr10 | 61716094 | 61716281 |
| chr10 | 61716497 | 61716668 |
| chr10 | 61734158 | 61734342 |
| chr10 | 61734342 | 61734544 |
| chr10 | 61734544 | 61734804 |
| chr10 | 61741251 | 61741567 |
| chr10 | 61741567 | 61741833 |
| chr10 | 61745215 | 61745439 |
| chr10 | 61756853 | 61757518 |
| chr10 | 61759859 | 61760262 |
| chr10 | 61782890 | 61783080 |
| chr10 | 61783150 | 61783582 |
| chr10 | 61783743 | 61784116 |
| chr10 | 61820148 | 61820298 |
| chr10 | 61838808 | 61839050 |
| chr10 | 61844548 | 61844761 |
| chr10 | 61845505 | 61845809 |
| chr10 | 61854827 | 61855063 |
| chr10 | 61855264 | 61855534 |
| chr10 | 61874819 | 61875057 |
| chr10 | 61877845 | 61878252 |
| chr10 | 61906096 | 61906467 |
| chr10 | 61943339 | 61943814 |
| chr10 | 61943845 | 61944093 |
| chr10 | 61944267 | 61944826 |
| chr10 | 61949134 | 61949857 |
| chr10 | 61950766 | 61950958 |
| chr10 | 61955224 | 61955380 |
| chr10 | 61965084 | 61965495 |
| chr10 | 61965495 | 61966024 |

|       |          |          |
|-------|----------|----------|
| chr10 | 61972405 | 61972669 |
| chr10 | 61977103 | 61977393 |
| chr10 | 61978183 | 61978348 |
| chr10 | 61978403 | 61978619 |
| chr10 | 61979019 | 61979207 |
| chr10 | 61980478 | 61980768 |
| chr10 | 62019470 | 62019628 |
| chr10 | 62033496 | 62033692 |
| chr10 | 62044440 | 62044608 |
| chr10 | 62050659 | 62050809 |
| chr10 | 62055453 | 62055793 |
| chr10 | 62059115 | 62059290 |
| chr10 | 62066279 | 62066540 |
| chr10 | 62069477 | 62069746 |
| chr10 | 62102100 | 62102399 |
| chr10 | 62104864 | 62105209 |
| chr10 | 62105218 | 62105496 |
| chr10 | 62110468 | 62110707 |
| chr10 | 62110707 | 62110926 |
| chr10 | 62110926 | 62111220 |
| chr10 | 62111273 | 62111552 |
| chr10 | 62113508 | 62113687 |
| chr10 | 62116100 | 62116374 |
| chr10 | 62124866 | 62125067 |
| chr10 | 62148369 | 62148879 |
| chr10 | 62181726 | 62181992 |
| chr10 | 62183073 | 62183447 |
| chr10 | 62183472 | 62183622 |
| chr10 | 62186946 | 62187239 |
| chr10 | 62189392 | 62189577 |
| chr10 | 62190061 | 62190314 |
| chr10 | 62192599 | 62193314 |
| chr10 | 62195284 | 62195807 |
| chr10 | 62201295 | 62201535 |
| chr10 | 62202603 | 62202864 |
| chr10 | 62212494 | 62212928 |
| chr10 | 62221498 | 62222230 |
| chr10 | 62222798 | 62223014 |
| chr10 | 62223822 | 62224031 |
| chr10 | 62230557 | 62230961 |
| chr10 | 62230961 | 62231626 |
| chr10 | 62237911 | 62238317 |

|       |          |          |
|-------|----------|----------|
| chr10 | 62238378 | 62238576 |
| chr10 | 62242813 | 62243273 |
| chr10 | 62244156 | 62244320 |
| chr10 | 62247519 | 62248234 |
| chr10 | 62261087 | 62261505 |
| chr10 | 62261505 | 62261849 |
| chr10 | 62266874 | 62267033 |
| chr10 | 62275284 | 62275534 |
| chr10 | 62282880 | 62283041 |
| chr10 | 62299901 | 62300270 |
| chr10 | 62300270 | 62300867 |
| chr10 | 62313834 | 62314106 |
| chr10 | 62320257 | 62320736 |
| chr10 | 62320736 | 62321045 |
| chr10 | 62323702 | 62324189 |
| chr10 | 62329629 | 62330026 |
| chr10 | 62330026 | 62330389 |
| chr10 | 62332418 | 62332876 |
| chr10 | 62336663 | 62336922 |
| chr10 | 62337206 | 62337364 |
| chr10 | 62337384 | 62337648 |
| chr10 | 62338284 | 62338485 |
| chr10 | 62339378 | 62339541 |
| chr10 | 62339826 | 62340113 |
| chr10 | 62340113 | 62340436 |
| chr10 | 62340436 | 62340744 |
| chr10 | 62358982 | 62359138 |
| chr10 | 62376915 | 62377200 |
| chr10 | 62381080 | 62381258 |
| chr10 | 62383179 | 62383341 |
| chr10 | 62411026 | 62411253 |
| chr10 | 62412871 | 62413496 |
| chr10 | 62413496 | 62413999 |
| chr10 | 62415811 | 62416020 |
| chr10 | 62419156 | 62419331 |
| chr10 | 62420564 | 62420750 |
| chr10 | 62424972 | 62425189 |
| chr10 | 62425189 | 62425450 |
| chr10 | 62425450 | 62425713 |
| chr10 | 62425713 | 62425905 |
| chr10 | 62426325 | 62426475 |
| chr10 | 62449290 | 62449590 |

|       |          |          |
|-------|----------|----------|
| chr10 | 62449590 | 62449865 |
| chr10 | 62449865 | 62450115 |
| chr10 | 62450115 | 62450326 |
| chr10 | 62450326 | 62450565 |
| chr10 | 62469811 | 62470088 |
| chr10 | 62471053 | 62471441 |
| chr10 | 62485856 | 62486092 |
| chr10 | 62486236 | 62486621 |
| chr10 | 62486621 | 62486861 |
| chr10 | 62486861 | 62487138 |
| chr10 | 62487138 | 62487427 |
| chr10 | 62488390 | 62488584 |
| chr10 | 62491810 | 62492068 |
| chr10 | 62500095 | 62500283 |
| chr10 | 62500283 | 62500534 |
| chr10 | 62517230 | 62517411 |
| chr10 | 62521977 | 62522139 |
| chr10 | 62522411 | 62522640 |
| chr10 | 62522890 | 62523057 |
| chr10 | 62535775 | 62535967 |
| chr10 | 62549598 | 62549854 |
| chr10 | 62549854 | 62550107 |
| chr10 | 62553624 | 62553822 |
| chr10 | 62557810 | 62558067 |
| chr10 | 62577803 | 62578082 |
| chr10 | 62578082 | 62578356 |
| chr10 | 62578356 | 62578699 |
| chr10 | 62578830 | 62579015 |
| chr10 | 62588794 | 62588944 |
| chr10 | 62590212 | 62590590 |
| chr10 | 62590753 | 62590918 |
| chr10 | 62601914 | 62602188 |
| chr10 | 62602188 | 62602460 |
| chr10 | 62602460 | 62602685 |
| chr10 | 62602685 | 62602921 |
| chr10 | 62627317 | 62627653 |
| chr10 | 62650467 | 62650650 |
| chr10 | 62650725 | 62651147 |
| chr10 | 62651147 | 62651445 |
| chr10 | 62651445 | 62651768 |
| chr10 | 62662067 | 62662221 |
| chr10 | 62683149 | 62683386 |

|       |          |          |
|-------|----------|----------|
| chr10 | 62703722 | 62703872 |
| chr10 | 62725700 | 62726003 |
| chr10 | 62726003 | 62726348 |
| chr10 | 62730870 | 62731252 |
| chr10 | 62736764 | 62736978 |
| chr10 | 62737150 | 62737325 |
| chr10 | 62740002 | 62740246 |
| chr10 | 62745610 | 62745774 |
| chr10 | 62747514 | 62747723 |
| chr10 | 62791742 | 62792241 |
| chr10 | 62792241 | 62792815 |
| chr10 | 62804174 | 62804412 |
| chr10 | 62808364 | 62808621 |
| chr10 | 62854993 | 62855372 |
| chr10 | 62857046 | 62857196 |
| chr10 | 62862519 | 62862740 |
| chr10 | 62865363 | 62865562 |
| chr10 | 62865562 | 62865740 |
| chr10 | 62885808 | 62885995 |
| chr10 | 62885995 | 62886196 |
| chr10 | 62886196 | 62886462 |
| chr10 | 62886476 | 62886804 |
| chr10 | 62886804 | 62887196 |
| chr10 | 62887196 | 62887527 |
| chr10 | 62902832 | 62903176 |
| chr10 | 62920097 | 62920297 |
| chr10 | 62920297 | 62920533 |
| chr10 | 62920533 | 62920789 |
| chr10 | 62920789 | 62921186 |
| chr10 | 62946649 | 62947490 |
| chr10 | 62979977 | 62980340 |
| chr10 | 62980340 | 62980962 |
| chr10 | 62987397 | 62987624 |
| chr10 | 63008229 | 63008509 |
| chr10 | 63023134 | 63023583 |
| chr10 | 63023583 | 63023963 |
| chr10 | 63023963 | 63024511 |
| chr10 | 63024626 | 63024865 |
| chr10 | 63031747 | 63031910 |
| chr10 | 63066007 | 63066462 |
| chr10 | 63100009 | 63100219 |
| chr10 | 63100219 | 63100540 |

|       |          |          |
|-------|----------|----------|
| chr10 | 63122599 | 63122776 |
| chr10 | 63128234 | 63128636 |
| chr10 | 63128636 | 63128897 |
| chr10 | 63133173 | 63133383 |
| chr10 | 63153665 | 63153821 |
| chr10 | 63158131 | 63158583 |
| chr10 | 63172052 | 63172401 |
| chr10 | 63172552 | 63172828 |
| chr10 | 63177246 | 63177556 |
| chr10 | 63177556 | 63177860 |
| chr10 | 63182491 | 63182780 |
| chr10 | 63186599 | 63186959 |
| chr10 | 63189536 | 63189872 |
| chr10 | 63189872 | 63190221 |
| chr10 | 63201401 | 63201831 |
| chr10 | 63221406 | 63221920 |
| chr10 | 63224263 | 63224659 |
| chr10 | 63236035 | 63236189 |
| chr10 | 63236661 | 63237064 |
| chr10 | 63237340 | 63237550 |
| chr10 | 63243555 | 63244009 |
| chr10 | 63244009 | 63244249 |
| chr10 | 63244249 | 63244527 |
| chr10 | 63244856 | 63245063 |
| chr10 | 63308625 | 63308930 |
| chr10 | 63309023 | 63309337 |
| chr10 | 63310241 | 63310549 |
| chr10 | 63327154 | 63327466 |
| chr10 | 63338283 | 63338628 |
| chr10 | 63338628 | 63338979 |
| chr10 | 63338979 | 63339593 |
| chr10 | 63377465 | 63377848 |
| chr10 | 63382389 | 63382673 |
| chr10 | 63382673 | 63382967 |
| chr10 | 63386440 | 63386848 |
| chr10 | 63400488 | 63400714 |
| chr10 | 63421967 | 63422185 |
| chr10 | 63422326 | 63422589 |
| chr10 | 63424486 | 63424737 |
| chr10 | 63428810 | 63429018 |
| chr10 | 63429401 | 63429739 |
| chr10 | 63429739 | 63430001 |



|       |          |          |
|-------|----------|----------|
| chr10 | 63430001 | 63430343 |
| chr10 | 63536583 | 63536882 |
| chr10 | 63541698 | 63542187 |
| chr10 | 63556693 | 63556843 |
| chr10 | 63571526 | 63572009 |
| chr10 | 63572919 | 63573225 |
| chr10 | 63582628 | 63582910 |
| chr10 | 63692205 | 63692355 |
| chr10 | 63738740 | 63738890 |
| chr10 | 63784865 | 63785041 |
| chr10 | 63797944 | 63798298 |
| chr10 | 63818857 | 63819095 |
| chr10 | 63844632 | 63844892 |
| chr10 | 63897357 | 63897628 |
| chr10 | 63898333 | 63898515 |
| chr10 | 63908248 | 63908440 |
| chr10 | 63908780 | 63909305 |
| chr10 | 63912873 | 63913242 |
| chr10 | 63915916 | 63916300 |
| chr10 | 63917356 | 63917839 |
| chr10 | 63929093 | 63929256 |
| chr10 | 63978112 | 63978329 |
| chr10 | 64023403 | 64023627 |
| chr10 | 64076053 | 64076314 |
| chr10 | 64076400 | 64076792 |
| chr10 | 64076792 | 64077093 |
| chr10 | 64077120 | 64077327 |
| chr10 | 64084539 | 64084699 |
| chr10 | 64090130 | 64090420 |
| chr10 | 64230266 | 64230567 |
| chr10 | 64230567 | 64230725 |
| chr10 | 64343009 | 64343403 |
| chr10 | 64344339 | 64344729 |
| chr10 | 64361581 | 64361988 |
| chr10 | 64362053 | 64362223 |
| chr10 | 64362920 | 64363292 |
| chr10 | 64376535 | 64376751 |
| chr10 | 64446751 | 64446927 |
| chr10 | 64470010 | 64470256 |
| chr10 | 64483338 | 64483779 |
| chr10 | 64522358 | 64522587 |
| chr10 | 64744150 | 64744527 |

|       |          |          |
|-------|----------|----------|
| chr10 | 64744938 | 64745230 |
| chr10 | 64750847 | 64751010 |
| chr10 | 64835682 | 64835979 |
| chr10 | 64836192 | 64836706 |
| chr10 | 64836900 | 64837188 |
| chr10 | 64837199 | 64837389 |
| chr10 | 64944619 | 64944999 |
| chr10 | 65033530 | 65033804 |
| chr10 | 65110956 | 65111168 |
| chr10 | 65174935 | 65175233 |
| chr10 | 65517972 | 65518273 |
| chr10 | 65681363 | 65681570 |
| chr10 | 65697571 | 65697836 |
| chr10 | 65697932 | 65698263 |
| chr10 | 65722576 | 65722816 |
| chr10 | 65725234 | 65725444 |
| chr10 | 65798535 | 65798744 |
| chr10 | 65839008 | 65839555 |
| chr10 | 65844756 | 65844988 |
| chr10 | 65845207 | 65845515 |
| chr10 | 65846213 | 65846453 |
| chr10 | 65954697 | 65954973 |
| chr10 | 65975447 | 65975785 |
| chr10 | 66036346 | 66036496 |
| chr10 | 66131835 | 66132324 |
| chr10 | 66213476 | 66213685 |
| chr10 | 66281835 | 66282156 |
| chr10 | 66323509 | 66323878 |
| chr10 | 66336441 | 66336627 |
| chr10 | 66337873 | 66338298 |
| chr10 | 66338298 | 66338528 |
| chr10 | 66345456 | 66345771 |
| chr10 | 66351099 | 66351271 |
| chr10 | 66353869 | 66354625 |
| chr10 | 66354860 | 66355254 |
| chr10 | 66355499 | 66355763 |
| chr10 | 66369223 | 66369543 |
| chr10 | 66392556 | 66392916 |
| chr10 | 66470769 | 66471010 |
| chr10 | 66492535 | 66492815 |
| chr10 | 66503254 | 66503566 |
| chr10 | 66504792 | 66504947 |

|       |          |          |
|-------|----------|----------|
| chr10 | 66511284 | 66511699 |
| chr10 | 66511699 | 66512317 |
| chr10 | 66534597 | 66534758 |
| chr10 | 66548159 | 66548328 |
| chr10 | 66552792 | 66553190 |
| chr10 | 66553190 | 66553534 |
| chr10 | 66571830 | 66572073 |
| chr10 | 66574830 | 66575090 |
| chr10 | 66712251 | 66712455 |
| chr10 | 66733780 | 66733953 |
| chr10 | 66807667 | 66807853 |
| chr10 | 66812986 | 66813274 |
| chr10 | 66813900 | 66814097 |
| chr10 | 66814097 | 66814336 |
| chr10 | 66814336 | 66814552 |
| chr10 | 66814552 | 66814822 |
| chr10 | 66844561 | 66844737 |
| chr10 | 66849639 | 66850217 |
| chr10 | 66850217 | 66850704 |
| chr10 | 66864145 | 66864952 |
| chr10 | 66884964 | 66885164 |
| chr10 | 66885415 | 66885821 |
| chr10 | 66885821 | 66886063 |
| chr10 | 66891675 | 66892357 |
| chr10 | 66899872 | 66900069 |
| chr10 | 66904198 | 66904371 |
| chr10 | 66904956 | 66905325 |
| chr10 | 66909253 | 66909506 |
| chr10 | 66911248 | 66911704 |
| chr10 | 66911704 | 66912110 |
| chr10 | 66919884 | 66920283 |
| chr10 | 66920800 | 66921012 |
| chr10 | 66921053 | 66921497 |
| chr10 | 66921497 | 66921883 |
| chr10 | 66928158 | 66928562 |
| chr10 | 66928562 | 66928993 |
| chr10 | 66935959 | 66936113 |
| chr10 | 66942033 | 66942224 |
| chr10 | 66945932 | 66946716 |
| chr10 | 66947171 | 66947333 |
| chr10 | 66947335 | 66947515 |
| chr10 | 66968589 | 66968847 |

|       |          |          |
|-------|----------|----------|
| chr10 | 66974476 | 66974648 |
| chr10 | 66975529 | 66975791 |
| chr10 | 66976592 | 66976768 |
| chr10 | 66984244 | 66984757 |
| chr10 | 66987543 | 66987886 |
| chr10 | 66990315 | 66990558 |
| chr10 | 66990558 | 66990963 |
| chr10 | 66991811 | 66992083 |
| chr10 | 66998625 | 66998775 |
| chr10 | 67001196 | 67001410 |
| chr10 | 67002642 | 67003102 |
| chr10 | 67003199 | 67003615 |
| chr10 | 67014833 | 67015036 |
| chr10 | 67022858 | 67023236 |
| chr10 | 67023236 | 67023598 |
| chr10 | 67025806 | 67026265 |
| chr10 | 67040908 | 67041184 |
| chr10 | 67042248 | 67042521 |
| chr10 | 67048858 | 67049249 |
| chr10 | 67049249 | 67049610 |
| chr10 | 67069052 | 67069470 |
| chr10 | 67071498 | 67071733 |
| chr10 | 67083602 | 67084096 |
| chr10 | 67086065 | 67086289 |
| chr10 | 67095913 | 67096194 |
| chr10 | 67096194 | 67096705 |
| chr10 | 67096803 | 67097087 |
| chr10 | 67097087 | 67097338 |
| chr10 | 67098448 | 67099108 |
| chr10 | 67105757 | 67105960 |
| chr10 | 67106880 | 67107562 |
| chr10 | 67111101 | 67111259 |
| chr10 | 67115867 | 67116215 |
| chr10 | 67119660 | 67119810 |
| chr10 | 67126308 | 67126632 |
| chr10 | 67126632 | 67126975 |
| chr10 | 67126975 | 67127336 |
| chr10 | 67127336 | 67127600 |
| chr10 | 67155357 | 67155564 |
| chr10 | 67156424 | 67156734 |
| chr10 | 67156734 | 67157312 |
| chr10 | 67157468 | 67157845 |

|       |          |          |
|-------|----------|----------|
| chr10 | 67174132 | 67174366 |
| chr10 | 67176059 | 67176408 |
| chr10 | 67185486 | 67185826 |
| chr10 | 67185826 | 67186133 |
| chr10 | 67186954 | 67187200 |
| chr10 | 67187294 | 67187476 |
| chr10 | 67192472 | 67192924 |
| chr10 | 67195205 | 67195464 |
| chr10 | 67196596 | 67197065 |
| chr10 | 67207571 | 67207736 |
| chr10 | 67218652 | 67218915 |
| chr10 | 67218975 | 67219217 |
| chr10 | 67219217 | 67219545 |
| chr10 | 67223927 | 67224283 |
| chr10 | 67238145 | 67238313 |
| chr10 | 67247170 | 67247516 |
| chr10 | 67256377 | 67256582 |
| chr10 | 67259628 | 67259924 |
| chr10 | 67259924 | 67260196 |
| chr10 | 67264948 | 67265168 |
| chr10 | 67282000 | 67282269 |
| chr10 | 67282589 | 67282866 |
| chr10 | 67284300 | 67284471 |
| chr10 | 67284622 | 67285109 |
| chr10 | 67285109 | 67285649 |
| chr10 | 67311007 | 67311185 |
| chr10 | 67311364 | 67311612 |
| chr10 | 67311647 | 67311862 |
| chr10 | 67315043 | 67315372 |
| chr10 | 67316313 | 67316608 |
| chr10 | 67360802 | 67361269 |
| chr10 | 67362248 | 67362496 |
| chr10 | 67377753 | 67378364 |
| chr10 | 67393511 | 67393661 |
| chr10 | 67439083 | 67439617 |
| chr10 | 67458734 | 67458962 |
| chr10 | 67458962 | 67459431 |
| chr10 | 67461400 | 67461632 |
| chr10 | 67483486 | 67483669 |
| chr10 | 67487403 | 67487813 |
| chr10 | 67488522 | 67488774 |
| chr10 | 67489994 | 67490223 |

|       |          |          |
|-------|----------|----------|
| chr10 | 67490470 | 67490987 |
| chr10 | 67493621 | 67493892 |
| chr10 | 67504315 | 67504508 |
| chr10 | 67535981 | 67536425 |
| chr10 | 67536696 | 67536882 |
| chr10 | 67536882 | 67537080 |
| chr10 | 67537293 | 67537644 |
| chr10 | 67537644 | 67537943 |
| chr10 | 67547855 | 67548381 |
| chr10 | 67548381 | 67548674 |
| chr10 | 67548674 | 67548921 |
| chr10 | 67548921 | 67549228 |
| chr10 | 67549228 | 67549508 |
| chr10 | 67549508 | 67549805 |
| chr10 | 67607651 | 67607849 |
| chr10 | 67610638 | 67611081 |
| chr10 | 67666096 | 67666300 |
| chr10 | 67671664 | 67671995 |
| chr10 | 67712091 | 67712327 |
| chr10 | 67717408 | 67717931 |
| chr10 | 67717931 | 67718258 |
| chr10 | 67726459 | 67726688 |
| chr10 | 67732570 | 67732720 |
| chr10 | 67756154 | 67756365 |
| chr10 | 67785147 | 67785455 |
| chr10 | 67785455 | 67786144 |
| chr10 | 67845872 | 67846576 |
| chr10 | 67851159 | 67851448 |
| chr10 | 67858940 | 67859211 |
| chr10 | 67865755 | 67866273 |
| chr10 | 67868591 | 67868970 |
| chr10 | 67871871 | 67872151 |
| chr10 | 67890964 | 67891284 |
| chr10 | 67891284 | 67891679 |
| chr10 | 67899016 | 67899283 |
| chr10 | 67912279 | 67912883 |
| chr10 | 67917922 | 67918175 |
| chr10 | 67933792 | 67933952 |
| chr10 | 67934393 | 67935043 |
| chr10 | 67936852 | 67937170 |
| chr10 | 67938356 | 67938554 |
| chr10 | 67938579 | 67938836 |

|       |          |          |
|-------|----------|----------|
| chr10 | 67943528 | 67943765 |
| chr10 | 67979320 | 67979777 |
| chr10 | 67979777 | 67980144 |
| chr10 | 67983873 | 67984043 |
| chr10 | 67984133 | 67984623 |
| chr10 | 67984623 | 67984919 |
| chr10 | 67996289 | 67996451 |
| chr10 | 67998156 | 67998434 |
| chr10 | 67998446 | 67998649 |
| chr10 | 68002131 | 68002312 |
| chr10 | 68007994 | 68008262 |
| chr10 | 68008262 | 68008582 |
| chr10 | 68008582 | 68008902 |
| chr10 | 68038601 | 68038831 |
| chr10 | 68039353 | 68039503 |
| chr10 | 68039626 | 68039962 |
| chr10 | 68039962 | 68040275 |
| chr10 | 68087433 | 68087590 |
| chr10 | 68087841 | 68088035 |
| chr10 | 68089945 | 68090501 |
| chr10 | 68091852 | 68092266 |
| chr10 | 68102040 | 68102295 |
| chr10 | 68103490 | 68103803 |
| chr10 | 68104026 | 68104266 |
| chr10 | 68104353 | 68104526 |
| chr10 | 68104565 | 68104918 |
| chr10 | 68104918 | 68105227 |
| chr10 | 68105257 | 68105409 |
| chr10 | 68117369 | 68117582 |
| chr10 | 68127255 | 68127522 |
| chr10 | 68134587 | 68134880 |
| chr10 | 68136495 | 68137081 |
| chr10 | 68137359 | 68137869 |
| chr10 | 68142225 | 68142524 |
| chr10 | 68144358 | 68144804 |
| chr10 | 68146927 | 68147179 |
| chr10 | 68148605 | 68148792 |
| chr10 | 68156296 | 68156618 |
| chr10 | 68156672 | 68156971 |
| chr10 | 68156993 | 68157345 |
| chr10 | 68203375 | 68203800 |
| chr10 | 68225486 | 68225718 |

|       |          |          |
|-------|----------|----------|
| chr10 | 68238234 | 68238503 |
| chr10 | 68238503 | 68238691 |
| chr10 | 68238761 | 68238958 |
| chr10 | 68246718 | 68246868 |
| chr10 | 68247524 | 68247783 |
| chr10 | 68248379 | 68248734 |
| chr10 | 68248734 | 68249139 |
| chr10 | 68249530 | 68249840 |
| chr10 | 68263357 | 68263671 |
| chr10 | 68263671 | 68263973 |
| chr10 | 68265459 | 68265771 |
| chr10 | 68268705 | 68268986 |
| chr10 | 68275372 | 68275624 |
| chr10 | 68276333 | 68276639 |
| chr10 | 68276639 | 68276927 |
| chr10 | 68276927 | 68277250 |
| chr10 | 68277255 | 68277411 |
| chr10 | 68281155 | 68281339 |
| chr10 | 68282543 | 68282735 |
| chr10 | 68282814 | 68283479 |
| chr10 | 68354405 | 68354720 |
| chr10 | 68354720 | 68355126 |
| chr10 | 68356100 | 68356481 |
| chr10 | 68361211 | 68361442 |
| chr10 | 68375306 | 68375515 |
| chr10 | 68375782 | 68375952 |
| chr10 | 68377492 | 68377765 |
| chr10 | 68417159 | 68417321 |
| chr10 | 68512444 | 68512817 |
| chr10 | 68587486 | 68587705 |
| chr10 | 68625465 | 68625637 |
| chr10 | 68662011 | 68662161 |
| chr10 | 68666090 | 68666317 |
| chr10 | 68695309 | 68695649 |
| chr10 | 68695649 | 68696299 |
| chr10 | 68701758 | 68701936 |
| chr10 | 68705567 | 68705770 |
| chr10 | 68711982 | 68712144 |
| chr10 | 68897500 | 68897866 |
| chr10 | 68907299 | 68907560 |
| chr10 | 68908199 | 68908349 |
| chr10 | 68916207 | 68916704 |



|       |          |          |
|-------|----------|----------|
| chr10 | 68968643 | 68969176 |
| chr10 | 68969176 | 68969556 |
| chr10 | 68970661 | 68970821 |
| chr10 | 68976474 | 68976746 |
| chr10 | 68976746 | 68977015 |
| chr10 | 68990547 | 68990860 |
| chr10 | 69005633 | 69005787 |
| chr10 | 69093261 | 69093479 |
| chr10 | 69102140 | 69102298 |
| chr10 | 69104385 | 69104571 |
| chr10 | 69112182 | 69112382 |
| chr10 | 69131307 | 69131616 |
| chr10 | 69133873 | 69134102 |
| chr10 | 69134348 | 69134853 |
| chr10 | 69149278 | 69149614 |
| chr10 | 69157506 | 69157831 |
| chr10 | 69165260 | 69165419 |
| chr10 | 69165897 | 69166241 |
| chr10 | 69185096 | 69185246 |
| chr10 | 69185375 | 69185850 |
| chr10 | 69185850 | 69186283 |
| chr10 | 69186367 | 69186558 |
| chr10 | 69204704 | 69205026 |
| chr10 | 69205029 | 69205561 |
| chr10 | 69212499 | 69212895 |
| chr10 | 69212895 | 69213380 |
| chr10 | 69213380 | 69213886 |
| chr10 | 69218734 | 69219316 |
| chr10 | 69271475 | 69271691 |
| chr10 | 69276158 | 69276432 |
| chr10 | 69287493 | 69287644 |
| chr10 | 69296431 | 69296791 |
| chr10 | 69304934 | 69305084 |
| chr10 | 69306540 | 69306998 |
| chr10 | 69307167 | 69307438 |
| chr10 | 69321289 | 69321567 |
| chr10 | 69321737 | 69321956 |
| chr10 | 69328744 | 69328973 |
| chr10 | 69329682 | 69329832 |
| chr10 | 69333286 | 69333497 |
| chr10 | 69340042 | 69340519 |
| chr10 | 69341286 | 69341574 |

|       |          |          |
|-------|----------|----------|
| chr10 | 69352213 | 69352429 |
| chr10 | 69352429 | 69352728 |
| chr10 | 69352728 | 69353367 |
| chr10 | 69367046 | 69367213 |
| chr10 | 69371532 | 69371765 |
| chr10 | 69398326 | 69398637 |
| chr10 | 69398637 | 69399117 |
| chr10 | 69399117 | 69399635 |
| chr10 | 69399869 | 69400073 |
| chr10 | 69452141 | 69452487 |
| chr10 | 69454560 | 69454847 |
| chr10 | 69461705 | 69462012 |
| chr10 | 69462012 | 69462270 |
| chr10 | 69465651 | 69465855 |
| chr10 | 69475667 | 69475881 |
| chr10 | 69487570 | 69487767 |
| chr10 | 69497466 | 69497725 |
| chr10 | 69503782 | 69504031 |
| chr10 | 69507164 | 69508123 |
| chr10 | 69509846 | 69510127 |
| chr10 | 69516668 | 69516863 |
| chr10 | 69517415 | 69517637 |
| chr10 | 69533488 | 69533888 |
| chr10 | 69533978 | 69534179 |
| chr10 | 69536772 | 69536928 |
| chr10 | 69556374 | 69556620 |
| chr10 | 69570967 | 69571274 |
| chr10 | 69571287 | 69571480 |
| chr10 | 69571504 | 69571834 |
| chr10 | 69572128 | 69572302 |
| chr10 | 69572524 | 69572726 |
| chr10 | 69577356 | 69577746 |
| chr10 | 69577746 | 69578057 |
| chr10 | 69578057 | 69578335 |
| chr10 | 69579627 | 69579899 |
| chr10 | 69611737 | 69612059 |
| chr10 | 69612059 | 69612413 |
| chr10 | 69621174 | 69621378 |
| chr10 | 69628714 | 69629163 |
| chr10 | 69629352 | 69629506 |
| chr10 | 69629587 | 69629869 |
| chr10 | 69629949 | 69630151 |

|       |          |          |
|-------|----------|----------|
| chr10 | 69632977 | 69633247 |
| chr10 | 69640723 | 69640896 |
| chr10 | 69648941 | 69649163 |
| chr10 | 69652629 | 69652994 |
| chr10 | 69652994 | 69653327 |
| chr10 | 69653327 | 69653566 |
| chr10 | 69654914 | 69655288 |
| chr10 | 69655288 | 69655778 |
| chr10 | 69662380 | 69662864 |
| chr10 | 69670798 | 69671048 |
| chr10 | 69671048 | 69671376 |
| chr10 | 69671430 | 69671762 |
| chr10 | 69709776 | 69709967 |
| chr10 | 69710804 | 69711057 |
| chr10 | 69711057 | 69711370 |
| chr10 | 69711370 | 69711794 |
| chr10 | 69716779 | 69717065 |
| chr10 | 69717065 | 69717441 |
| chr10 | 69721676 | 69721896 |
| chr10 | 69736385 | 69736636 |
| chr10 | 69739490 | 69739852 |
| chr10 | 69746904 | 69747148 |
| chr10 | 69756714 | 69757510 |
| chr10 | 69777031 | 69777754 |
| chr10 | 69784773 | 69785038 |
| chr10 | 69793128 | 69793440 |
| chr10 | 69829030 | 69829180 |
| chr10 | 69829313 | 69829553 |
| chr10 | 69834776 | 69834932 |
| chr10 | 69845626 | 69845824 |
| chr10 | 69845824 | 69846257 |
| chr10 | 69849017 | 69849324 |
| chr10 | 69852491 | 69852678 |
| chr10 | 69870419 | 69870654 |
| chr10 | 69872092 | 69872327 |
| chr10 | 69872327 | 69872917 |
| chr10 | 69872941 | 69873164 |
| chr10 | 69888485 | 69888727 |
| chr10 | 69895742 | 69895892 |
| chr10 | 69908451 | 69908686 |
| chr10 | 69910411 | 69910960 |
| chr10 | 69916170 | 69916472 |

|       |          |          |
|-------|----------|----------|
| chr10 | 69916472 | 69916759 |
| chr10 | 69916759 | 69917037 |
| chr10 | 69917037 | 69917244 |
| chr10 | 69928311 | 69928770 |
| chr10 | 69930531 | 69931072 |
| chr10 | 69936508 | 69936685 |
| chr10 | 69937204 | 69937557 |
| chr10 | 69937557 | 69937864 |
| chr10 | 69964703 | 69964873 |
| chr10 | 70030338 | 70030599 |
| chr10 | 70030602 | 70030806 |
| chr10 | 70031873 | 70032327 |
| chr10 | 70039958 | 70040233 |
| chr10 | 70056792 | 70057031 |
| chr10 | 70057087 | 70057470 |
| chr10 | 70060716 | 70061015 |
| chr10 | 70067215 | 70067405 |
| chr10 | 70094998 | 70095254 |
| chr10 | 70095254 | 70095524 |
| chr10 | 70096441 | 70096671 |
| chr10 | 70096671 | 70096927 |
| chr10 | 70096927 | 70097379 |
| chr10 | 70097637 | 70097824 |
| chr10 | 70097855 | 70098297 |
| chr10 | 70110098 | 70110332 |
| chr10 | 70120671 | 70121289 |
| chr10 | 70121289 | 70121688 |
| chr10 | 70123453 | 70123822 |
| chr10 | 70133237 | 70133543 |
| chr10 | 70138297 | 70138447 |
| chr10 | 70156494 | 70156754 |
| chr10 | 70160174 | 70160326 |
| chr10 | 70165999 | 70166163 |
| chr10 | 70173364 | 70173615 |
| chr10 | 70186229 | 70186459 |
| chr10 | 70186580 | 70186776 |
| chr10 | 70222296 | 70222537 |
| chr10 | 70244842 | 70245185 |
| chr10 | 70245185 | 70245626 |
| chr10 | 70245650 | 70245899 |
| chr10 | 70256489 | 70256662 |
| chr10 | 70257118 | 70257469 |

|       |          |          |
|-------|----------|----------|
| chr10 | 70266537 | 70266853 |
| chr10 | 70278199 | 70278405 |
| chr10 | 70287463 | 70287741 |
| chr10 | 70287741 | 70288039 |
| chr10 | 70288039 | 70288287 |
| chr10 | 70288487 | 70288653 |
| chr10 | 70296665 | 70296876 |
| chr10 | 70296876 | 70297143 |
| chr10 | 70318736 | 70318967 |
| chr10 | 70328561 | 70328829 |
| chr10 | 70470900 | 70471169 |
| chr10 | 70519622 | 70520174 |
| chr10 | 70520236 | 70520522 |
| chr10 | 70520855 | 70521011 |
| chr10 | 70595074 | 70595366 |
| chr10 | 70598457 | 70598627 |
| chr10 | 70598627 | 70598896 |
| chr10 | 70598896 | 70599237 |
| chr10 | 70599237 | 70599519 |
| chr10 | 70599519 | 70599972 |
| chr10 | 70600036 | 70600198 |
| chr10 | 70703371 | 70703550 |
| chr10 | 70847412 | 70847870 |
| chr10 | 70848176 | 70848448 |
| chr10 | 70852726 | 70852877 |
| chr10 | 70856067 | 70856225 |
| chr10 | 70864652 | 70865079 |
| chr10 | 70901294 | 70901864 |
| chr10 | 70902829 | 70903157 |
| chr10 | 70903157 | 70903413 |
| chr10 | 70919448 | 70919828 |
| chr10 | 70923322 | 70923544 |
| chr10 | 70932669 | 70932955 |
| chr10 | 70932955 | 70933282 |
| chr10 | 70960433 | 70960585 |
| chr10 | 71058585 | 71059296 |
| chr10 | 71119719 | 71119879 |
| chr10 | 71130319 | 71130611 |
| chr10 | 71158903 | 71159094 |
| chr10 | 71159094 | 71159322 |
| chr10 | 71159322 | 71159539 |
| chr10 | 71159539 | 71159761 |

|       |          |          |
|-------|----------|----------|
| chr10 | 71159761 | 71160014 |
| chr10 | 71217382 | 71217652 |
| chr10 | 71218298 | 71218563 |
| chr10 | 71225979 | 71226198 |
| chr10 | 71237517 | 71237899 |
| chr10 | 71237899 | 71238439 |
| chr10 | 71261813 | 71261965 |
| chr10 | 71266252 | 71266489 |
| chr10 | 71284418 | 71284693 |
| chr10 | 71284693 | 71284932 |
| chr10 | 71284932 | 71285150 |
| chr10 | 71285150 | 71285593 |
| chr10 | 71292263 | 71292639 |
| chr10 | 71293366 | 71293555 |
| chr10 | 71306240 | 71306461 |
| chr10 | 71324796 | 71324981 |
| chr10 | 71326862 | 71327104 |
| chr10 | 71334298 | 71334569 |
| chr10 | 71338584 | 71338762 |
| chr10 | 71344533 | 71344826 |
| chr10 | 71344826 | 71345232 |
| chr10 | 71347222 | 71347710 |
| chr10 | 71347710 | 71347937 |
| chr10 | 71347937 | 71348287 |
| chr10 | 71348287 | 71348609 |
| chr10 | 71363883 | 71364301 |
| chr10 | 71376063 | 71376326 |
| chr10 | 71398123 | 71398769 |
| chr10 | 71399434 | 71399765 |
| chr10 | 71401351 | 71401561 |
| chr10 | 71480021 | 71480251 |
| chr10 | 71830761 | 71830916 |
| chr10 | 71857727 | 71857936 |
| chr10 | 71867205 | 71867694 |
| chr10 | 71867694 | 71867992 |
| chr10 | 71885017 | 71885371 |
| chr10 | 71885371 | 71885671 |
| chr10 | 71895570 | 71895788 |
| chr10 | 71901413 | 71901645 |
| chr10 | 71901679 | 71901966 |
| chr10 | 71905091 | 71905341 |
| chr10 | 71953300 | 71953520 |

|       |          |          |
|-------|----------|----------|
| chr10 | 71959626 | 71960179 |
| chr10 | 71960206 | 71960464 |
| chr10 | 71960487 | 71960719 |
| chr10 | 71960719 | 71961055 |
| chr10 | 71971150 | 71971445 |
| chr10 | 71980546 | 71980929 |
| chr10 | 71988181 | 71988342 |
| chr10 | 72015856 | 72016260 |
| chr10 | 72016260 | 72016556 |
| chr10 | 72127750 | 72127957 |
| chr10 | 72293302 | 72293482 |
| chr10 | 72297104 | 72297411 |
| chr10 | 72352883 | 72353300 |
| chr10 | 72484451 | 72484722 |
| chr10 | 72551576 | 72551986 |
| chr10 | 72588417 | 72588631 |
| chr10 | 72588631 | 72588954 |
| chr10 | 72598712 | 72599202 |
| chr10 | 72599246 | 72599484 |
| chr10 | 72604497 | 72604716 |
| chr10 | 72605015 | 72605214 |
| chr10 | 72613128 | 72613409 |
| chr10 | 72620572 | 72620870 |
| chr10 | 72622923 | 72623182 |
| chr10 | 72623182 | 72623365 |
| chr10 | 72634000 | 72634662 |
| chr10 | 72645393 | 72645545 |
| chr10 | 72654367 | 72654662 |
| chr10 | 72654662 | 72654987 |
| chr10 | 72654987 | 72655256 |
| chr10 | 72655256 | 72655591 |
| chr10 | 72660344 | 72660799 |
| chr10 | 72664005 | 72664203 |
| chr10 | 72674584 | 72674739 |
| chr10 | 72676653 | 72676826 |
| chr10 | 72680620 | 72680832 |
| chr10 | 72681269 | 72681522 |
| chr10 | 72702331 | 72702515 |
| chr10 | 72709111 | 72709379 |
| chr10 | 72713849 | 72714004 |
| chr10 | 72775897 | 72776180 |
| chr10 | 72778293 | 72778541 |

|       |          |          |
|-------|----------|----------|
| chr10 | 72778541 | 72778827 |
| chr10 | 72783055 | 72783362 |
| chr10 | 72783460 | 72784034 |
| chr10 | 72797654 | 72797932 |
| chr10 | 72834699 | 72834978 |
| chr10 | 72947875 | 72948125 |
| chr10 | 72955686 | 72955883 |
| chr10 | 72974820 | 72975045 |
| chr10 | 72981454 | 72981670 |
| chr10 | 72988271 | 72988554 |
| chr10 | 72988554 | 72989116 |
| chr10 | 72989640 | 72990096 |
| chr10 | 73001365 | 73001572 |
| chr10 | 73011960 | 73012139 |
| chr10 | 73020135 | 73020316 |
| chr10 | 73060526 | 73061012 |
| chr10 | 73061012 | 73061328 |
| chr10 | 73077887 | 73078087 |
| chr10 | 73098136 | 73098387 |
| chr10 | 73098900 | 73099353 |
| chr10 | 73099353 | 73099748 |
| chr10 | 73099748 | 73100037 |
| chr10 | 73100037 | 73100287 |
| chr10 | 73106026 | 73106186 |
| chr10 | 73116633 | 73116825 |
| chr10 | 73216113 | 73216294 |
| chr10 | 73242413 | 73242659 |
| chr10 | 73422583 | 73422834 |
| chr10 | 73733256 | 73733570 |
| chr10 | 73742631 | 73742907 |
| chr10 | 73743123 | 73743495 |
| chr10 | 73746034 | 73746254 |
| chr10 | 73747087 | 73747339 |
| chr10 | 73812355 | 73812618 |
| chr10 | 73826471 | 73826621 |
| chr10 | 73995858 | 73996035 |
| chr10 | 74051821 | 74052142 |
| chr10 | 74062064 | 74062257 |
| chr10 | 74079748 | 74079982 |
| chr10 | 74098344 | 74098705 |
| chr10 | 74115305 | 74115559 |
| chr10 | 74123508 | 74123756 |



|       |          |          |
|-------|----------|----------|
| chr10 | 74146014 | 74146504 |
| chr10 | 74148012 | 74148343 |
| chr10 | 74148832 | 74149141 |
| chr10 | 74150550 | 74150882 |
| chr10 | 74283296 | 74283454 |
| chr10 | 74353696 | 74353883 |
| chr10 | 74362729 | 74362930 |
| chr10 | 74368405 | 74368718 |
| chr10 | 74444131 | 74444285 |
| chr10 | 74447579 | 74447951 |
| chr10 | 74527548 | 74527951 |
| chr10 | 74538338 | 74538775 |
| chr10 | 74538812 | 74539301 |
| chr10 | 74601716 | 74601938 |
| chr10 | 74643899 | 74644179 |
| chr10 | 74644179 | 74644481 |
| chr10 | 74662835 | 74663209 |
| chr10 | 74663209 | 74663650 |
| chr10 | 74676734 | 74676886 |
| chr10 | 74679942 | 74680150 |
| chr10 | 74680237 | 74680571 |
| chr10 | 74680571 | 74680885 |
| chr10 | 74680885 | 74681161 |
| chr10 | 74681986 | 74682138 |
| chr10 | 74722321 | 74722471 |
| chr10 | 74724094 | 74724269 |
| chr10 | 74789353 | 74789555 |
| chr10 | 74823452 | 74823730 |
| chr10 | 74834199 | 74834755 |
| chr10 | 74835428 | 74835610 |
| chr10 | 74848438 | 74848682 |
| chr10 | 74892401 | 74892846 |
| chr10 | 74920931 | 74921240 |
| chr10 | 74922719 | 74923385 |
| chr10 | 74924140 | 74924396 |
| chr10 | 74928693 | 74928935 |
| chr10 | 74929570 | 74930088 |
| chr10 | 74934650 | 74934812 |
| chr10 | 74935097 | 74935606 |
| chr10 | 74937067 | 74937357 |
| chr10 | 74938536 | 74938802 |
| chr10 | 74939390 | 74939597 |

|       |          |          |
|-------|----------|----------|
| chr10 | 74939881 | 74940058 |
| chr10 | 74948390 | 74948540 |
| chr10 | 74966840 | 74967191 |
| chr10 | 74967191 | 74967504 |
| chr10 | 74973145 | 74973298 |
| chr10 | 74978129 | 74978404 |
| chr10 | 74988018 | 74988678 |
| chr10 | 74995588 | 74995833 |
| chr10 | 75005229 | 75005453 |
| chr10 | 75021197 | 75021454 |
| chr10 | 75022778 | 75023016 |
| chr10 | 75031026 | 75031267 |
| chr10 | 75031438 | 75031687 |
| chr10 | 75031848 | 75032088 |
| chr10 | 75032457 | 75032651 |
| chr10 | 75036832 | 75037545 |
| chr10 | 75042170 | 75042394 |
| chr10 | 75044500 | 75044690 |
| chr10 | 75053654 | 75053981 |
| chr10 | 75059411 | 75059692 |
| chr10 | 75060127 | 75060391 |
| chr10 | 75060438 | 75060846 |
| chr10 | 75062427 | 75063031 |
| chr10 | 75063721 | 75063942 |
| chr10 | 75068783 | 75069074 |
| chr10 | 75069074 | 75069303 |
| chr10 | 75070151 | 75070347 |
| chr10 | 75070350 | 75070655 |
| chr10 | 75070691 | 75070966 |
| chr10 | 75071918 | 75072338 |
| chr10 | 75085500 | 75085797 |
| chr10 | 75091522 | 75091756 |
| chr10 | 75091782 | 75092030 |
| chr10 | 75092592 | 75092901 |
| chr10 | 75093752 | 75094049 |
| chr10 | 75098566 | 75098761 |
| chr10 | 75104069 | 75104481 |
| chr10 | 75104481 | 75105054 |
| chr10 | 75105070 | 75105428 |
| chr10 | 75105453 | 75105636 |
| chr10 | 75111867 | 75112176 |
| chr10 | 75112449 | 75112722 |

|       |          |          |
|-------|----------|----------|
| chr10 | 75114195 | 75114482 |
| chr10 | 75115285 | 75115620 |
| chr10 | 75116736 | 75116955 |
| chr10 | 75117212 | 75117398 |
| chr10 | 75118614 | 75118824 |
| chr10 | 75119354 | 75119788 |
| chr10 | 75120963 | 75121443 |
| chr10 | 75129005 | 75129787 |
| chr10 | 75130444 | 75130604 |
| chr10 | 75133181 | 75133367 |
| chr10 | 75137163 | 75137436 |
| chr10 | 75144129 | 75144376 |
| chr10 | 75150089 | 75150424 |
| chr10 | 75150424 | 75150918 |
| chr10 | 75150918 | 75151293 |
| chr10 | 75151322 | 75151654 |
| chr10 | 75160186 | 75160370 |
| chr10 | 75160487 | 75160701 |
| chr10 | 75160701 | 75160943 |
| chr10 | 75163713 | 75163897 |
| chr10 | 75169357 | 75169718 |
| chr10 | 75170240 | 75170981 |
| chr10 | 75173707 | 75173953 |
| chr10 | 75180585 | 75180745 |
| chr10 | 75182168 | 75182404 |
| chr10 | 75182407 | 75182683 |
| chr10 | 75184485 | 75184842 |
| chr10 | 75185605 | 75185888 |
| chr10 | 75191639 | 75192053 |
| chr10 | 75211659 | 75211921 |
| chr10 | 75211921 | 75212227 |
| chr10 | 75212227 | 75212469 |
| chr10 | 75212469 | 75212703 |
| chr10 | 75221986 | 75222392 |
| chr10 | 75222392 | 75223044 |
| chr10 | 75230641 | 75230906 |
| chr10 | 75231469 | 75231719 |
| chr10 | 75232134 | 75232302 |
| chr10 | 75232648 | 75233250 |
| chr10 | 75233305 | 75233502 |
| chr10 | 75233592 | 75233742 |
| chr10 | 75240617 | 75240896 |

|       |          |          |
|-------|----------|----------|
| chr10 | 75250837 | 75251089 |
| chr10 | 75251089 | 75251318 |
| chr10 | 75252288 | 75252688 |
| chr10 | 75299710 | 75300126 |
| chr10 | 75300126 | 75300509 |
| chr10 | 75300808 | 75301088 |
| chr10 | 75316610 | 75316953 |
| chr10 | 75316953 | 75317209 |
| chr10 | 75317231 | 75317465 |
| chr10 | 75317465 | 75317723 |
| chr10 | 75320431 | 75320587 |
| chr10 | 75322076 | 75322361 |
| chr10 | 75326340 | 75327059 |
| chr10 | 75343188 | 75343352 |
| chr10 | 75378758 | 75379106 |
| chr10 | 75394821 | 75395025 |
| chr10 | 75406785 | 75407007 |
| chr10 | 75428960 | 75429517 |
| chr10 | 75434400 | 75434951 |
| chr10 | 75436715 | 75436962 |
| chr10 | 75439543 | 75439775 |
| chr10 | 75441987 | 75442274 |
| chr10 | 75449389 | 75449626 |
| chr10 | 75466145 | 75466626 |
| chr10 | 75486484 | 75486700 |
| chr10 | 75486700 | 75486899 |
| chr10 | 75487225 | 75487416 |
| chr10 | 75497300 | 75497546 |
| chr10 | 75504784 | 75505155 |
| chr10 | 75505217 | 75505382 |
| chr10 | 75516959 | 75517603 |
| chr10 | 75517603 | 75518118 |
| chr10 | 75525548 | 75525811 |
| chr10 | 75534986 | 75535175 |
| chr10 | 75535608 | 75535942 |
| chr10 | 75548466 | 75548958 |
| chr10 | 75554194 | 75554482 |
| chr10 | 75559851 | 75560113 |
| chr10 | 75560113 | 75560432 |
| chr10 | 75566811 | 75567122 |
| chr10 | 75568868 | 75569166 |
| chr10 | 75571402 | 75571600 |

|       |          |          |
|-------|----------|----------|
| chr10 | 75586264 | 75586567 |
| chr10 | 75589758 | 75590061 |
| chr10 | 75614828 | 75615040 |
| chr10 | 75618026 | 75618228 |
| chr10 | 75621939 | 75622099 |
| chr10 | 75627088 | 75627239 |
| chr10 | 75635693 | 75636027 |
| chr10 | 75638266 | 75638421 |
| chr10 | 75643901 | 75644247 |
| chr10 | 75649094 | 75649328 |
| chr10 | 75663228 | 75663508 |
| chr10 | 75667444 | 75667869 |
| chr10 | 75667965 | 75668221 |
| chr10 | 75674123 | 75674311 |
| chr10 | 75675994 | 75676339 |
| chr10 | 75683988 | 75684483 |
| chr10 | 75684483 | 75684974 |
| chr10 | 75685155 | 75685378 |
| chr10 | 75685784 | 75685939 |
| chr10 | 75702639 | 75702897 |
| chr10 | 75704164 | 75704517 |
| chr10 | 75708735 | 75708980 |
| chr10 | 75739471 | 75739743 |
| chr10 | 75744071 | 75744365 |
| chr10 | 75751738 | 75751950 |
| chr10 | 75763813 | 75764115 |
| chr10 | 75764115 | 75764496 |
| chr10 | 75764496 | 75764767 |
| chr10 | 75764774 | 75764981 |
| chr10 | 75765065 | 75765454 |
| chr10 | 75767826 | 75768009 |
| chr10 | 75772729 | 75772879 |
| chr10 | 75772946 | 75773266 |
| chr10 | 75773266 | 75773726 |
| chr10 | 75780684 | 75780958 |
| chr10 | 75780958 | 75781275 |
| chr10 | 75781336 | 75781566 |
| chr10 | 75789841 | 75790184 |
| chr10 | 75790924 | 75791110 |
| chr10 | 75797603 | 75797917 |
| chr10 | 75797919 | 75798247 |
| chr10 | 75798346 | 75798703 |

|       |          |          |
|-------|----------|----------|
| chr10 | 75819829 | 75820212 |
| chr10 | 75820212 | 75820471 |
| chr10 | 75827520 | 75828040 |
| chr10 | 75828040 | 75828341 |
| chr10 | 75828360 | 75829050 |
| chr10 | 75835303 | 75835498 |
| chr10 | 75835498 | 75835713 |
| chr10 | 75835713 | 75835892 |
| chr10 | 75836056 | 75836643 |
| chr10 | 75837137 | 75837385 |
| chr10 | 75837385 | 75837691 |
| chr10 | 75853535 | 75853783 |
| chr10 | 75853783 | 75853993 |
| chr10 | 75854186 | 75854401 |
| chr10 | 75858991 | 75859155 |
| chr10 | 75859444 | 75860065 |
| chr10 | 75860065 | 75860437 |
| chr10 | 75872731 | 75873246 |
| chr10 | 75876156 | 75876377 |
| chr10 | 75878909 | 75879080 |
| chr10 | 75881281 | 75881548 |
| chr10 | 75883067 | 75883522 |
| chr10 | 75892974 | 75893709 |
| chr10 | 75898724 | 75899394 |
| chr10 | 75905801 | 75906139 |
| chr10 | 75920887 | 75921410 |
| chr10 | 75921410 | 75921867 |
| chr10 | 75921867 | 75922209 |
| chr10 | 75923367 | 75923553 |
| chr10 | 75930299 | 75930870 |
| chr10 | 75931953 | 75932170 |
| chr10 | 75932170 | 75932379 |
| chr10 | 75932379 | 75932670 |
| chr10 | 75935612 | 75936094 |
| chr10 | 75936094 | 75936465 |
| chr10 | 75951773 | 75952105 |
| chr10 | 75954616 | 75954783 |
| chr10 | 75968307 | 75968605 |
| chr10 | 75975292 | 75975564 |
| chr10 | 75983481 | 75983640 |
| chr10 | 75993743 | 75994011 |
| chr10 | 75997764 | 75997928 |

|       |          |          |
|-------|----------|----------|
| chr10 | 76032123 | 76032790 |
| chr10 | 76032790 | 76033116 |
| chr10 | 76046767 | 76047054 |
| chr10 | 76047054 | 76047266 |
| chr10 | 76047266 | 76047489 |
| chr10 | 76047543 | 76047772 |
| chr10 | 76072106 | 76072489 |
| chr10 | 76076992 | 76077172 |
| chr10 | 76118028 | 76118279 |
| chr10 | 76118498 | 76118734 |
| chr10 | 76118734 | 76118948 |
| chr10 | 76120112 | 76120318 |
| chr10 | 76120367 | 76120699 |
| chr10 | 76121374 | 76121881 |
| chr10 | 76140528 | 76140736 |
| chr10 | 76144129 | 76144489 |
| chr10 | 76146835 | 76147213 |
| chr10 | 76152705 | 76152856 |
| chr10 | 76157200 | 76157462 |
| chr10 | 76169838 | 76170364 |
| chr10 | 76190224 | 76190428 |
| chr10 | 76198501 | 76198674 |
| chr10 | 76202146 | 76202543 |
| chr10 | 76204034 | 76204293 |
| chr10 | 76214282 | 76214503 |
| chr10 | 76227434 | 76227597 |
| chr10 | 76230764 | 76230924 |
| chr10 | 76236580 | 76236823 |
| chr10 | 76237362 | 76237697 |
| chr10 | 76237697 | 76238022 |
| chr10 | 76238022 | 76238283 |
| chr10 | 76258023 | 76258399 |
| chr10 | 76261411 | 76261864 |
| chr10 | 76262077 | 76262423 |
| chr10 | 76262423 | 76262769 |
| chr10 | 76265526 | 76265803 |
| chr10 | 76271270 | 76271732 |
| chr10 | 76287677 | 76287896 |
| chr10 | 76288343 | 76288655 |
| chr10 | 76288734 | 76288943 |
| chr10 | 76306768 | 76307082 |
| chr10 | 76307082 | 76307395 |

|       |          |          |
|-------|----------|----------|
| chr10 | 76326493 | 76326678 |
| chr10 | 76326691 | 76326965 |
| chr10 | 76328610 | 76328882 |
| chr10 | 76336973 | 76337709 |
| chr10 | 76338266 | 76338468 |
| chr10 | 76344689 | 76345083 |
| chr10 | 76345083 | 76345374 |
| chr10 | 76345374 | 76345585 |
| chr10 | 76345585 | 76345854 |
| chr10 | 76346018 | 76346284 |
| chr10 | 76346308 | 76346531 |
| chr10 | 76346701 | 76346929 |
| chr10 | 76357445 | 76357922 |
| chr10 | 76358260 | 76358677 |
| chr10 | 76358677 | 76358910 |
| chr10 | 76382279 | 76382439 |
| chr10 | 76388924 | 76389126 |
| chr10 | 76391896 | 76392120 |
| chr10 | 76411402 | 76411565 |
| chr10 | 76411745 | 76411899 |
| chr10 | 76415131 | 76415314 |
| chr10 | 76418390 | 76418639 |
| chr10 | 76428250 | 76428559 |
| chr10 | 76442175 | 76442583 |
| chr10 | 76442583 | 76443117 |
| chr10 | 76443135 | 76443313 |
| chr10 | 76448727 | 76449276 |
| chr10 | 76455346 | 76455632 |
| chr10 | 76461367 | 76461517 |
| chr10 | 76468522 | 76468780 |
| chr10 | 76468780 | 76469205 |
| chr10 | 76503231 | 76503425 |
| chr10 | 76504265 | 76504658 |
| chr10 | 76504658 | 76504984 |
| chr10 | 76513191 | 76513710 |
| chr10 | 76531026 | 76531327 |
| chr10 | 76531327 | 76531943 |
| chr10 | 76537331 | 76537581 |
| chr10 | 76537581 | 76538108 |
| chr10 | 76542767 | 76543180 |
| chr10 | 76545016 | 76545312 |
| chr10 | 76550501 | 76550677 |



|       |          |          |
|-------|----------|----------|
| chr10 | 76551609 | 76551799 |
| chr10 | 76577881 | 76578045 |
| chr10 | 76584215 | 76584413 |
| chr10 | 76607984 | 76608383 |
| chr10 | 76623197 | 76623729 |
| chr10 | 76633912 | 76634466 |
| chr10 | 76634466 | 76634791 |
| chr10 | 76637112 | 76637355 |
| chr10 | 76642314 | 76642482 |
| chr10 | 76642547 | 76642846 |
| chr10 | 76643000 | 76643200 |
| chr10 | 76645216 | 76645534 |
| chr10 | 76648669 | 76649021 |
| chr10 | 76649021 | 76649277 |
| chr10 | 76650867 | 76651275 |
| chr10 | 76651480 | 76651655 |
| chr10 | 76653276 | 76653539 |
| chr10 | 76668958 | 76669223 |
| chr10 | 76693464 | 76693792 |
| chr10 | 76725938 | 76726265 |
| chr10 | 76730271 | 76730581 |
| chr10 | 76730581 | 76730890 |
| chr10 | 76735055 | 76735385 |
| chr10 | 76736874 | 76737040 |
| chr10 | 76739018 | 76739213 |
| chr10 | 76762407 | 76762574 |
| chr10 | 76763048 | 76763266 |
| chr10 | 76783889 | 76784039 |
| chr10 | 76791535 | 76791732 |
| chr10 | 76795874 | 76796100 |
| chr10 | 76798746 | 76799071 |
| chr10 | 76816596 | 76816750 |
| chr10 | 76835573 | 76835778 |
| chr10 | 76835778 | 76836189 |
| chr10 | 76858979 | 76859172 |
| chr10 | 76866056 | 76866212 |
| chr10 | 76874046 | 76874243 |
| chr10 | 76874371 | 76874702 |
| chr10 | 76902573 | 76903032 |
| chr10 | 76903117 | 76903453 |
| chr10 | 76903453 | 76903731 |
| chr10 | 76930916 | 76931089 |

|       |          |          |
|-------|----------|----------|
| chr10 | 76931122 | 76931744 |
| chr10 | 76935581 | 76935788 |
| chr10 | 76961704 | 76962374 |
| chr10 | 76963079 | 76963536 |
| chr10 | 76972429 | 76972632 |
| chr10 | 76986723 | 76986985 |
| chr10 | 76991195 | 76991345 |
| chr10 | 76993462 | 76993921 |
| chr10 | 76997825 | 76998103 |
| chr10 | 77005209 | 77005465 |
| chr10 | 77006276 | 77006457 |
| chr10 | 77016211 | 77016391 |
| chr10 | 77016498 | 77017165 |
| chr10 | 77017194 | 77017388 |
| chr10 | 77018194 | 77018497 |
| chr10 | 77021405 | 77021711 |
| chr10 | 77022847 | 77023073 |
| chr10 | 77030764 | 77030963 |
| chr10 | 77032553 | 77032953 |
| chr10 | 77032953 | 77033537 |
| chr10 | 77033537 | 77034157 |
| chr10 | 77034187 | 77034361 |
| chr10 | 77040488 | 77040643 |
| chr10 | 77040645 | 77040846 |
| chr10 | 77042543 | 77042741 |
| chr10 | 77049017 | 77049251 |
| chr10 | 77050873 | 77051042 |
| chr10 | 77051042 | 77051229 |
| chr10 | 77051332 | 77051496 |
| chr10 | 77052566 | 77052892 |
| chr10 | 77058147 | 77058305 |
| chr10 | 77061224 | 77061419 |
| chr10 | 77061487 | 77061683 |
| chr10 | 77064743 | 77064989 |
| chr10 | 77070135 | 77070523 |
| chr10 | 77071313 | 77071482 |
| chr10 | 77082257 | 77082512 |
| chr10 | 77082512 | 77082878 |
| chr10 | 77084596 | 77084885 |
| chr10 | 77089423 | 77089799 |
| chr10 | 77097968 | 77098318 |
| chr10 | 77098697 | 77099065 |

|       |          |          |
|-------|----------|----------|
| chr10 | 77110038 | 77110311 |
| chr10 | 77111341 | 77111498 |
| chr10 | 77111531 | 77112175 |
| chr10 | 77121352 | 77121617 |
| chr10 | 77125169 | 77125376 |
| chr10 | 77129982 | 77130420 |
| chr10 | 77130420 | 77130919 |
| chr10 | 77130959 | 77131109 |
| chr10 | 77135046 | 77135206 |
| chr10 | 77135280 | 77135678 |
| chr10 | 77136589 | 77136887 |
| chr10 | 77142172 | 77142685 |
| chr10 | 77146851 | 77147629 |
| chr10 | 77151181 | 77151331 |
| chr10 | 77151375 | 77151987 |
| chr10 | 77152136 | 77152425 |
| chr10 | 77152425 | 77152762 |
| chr10 | 77165429 | 77165754 |
| chr10 | 77165754 | 77165992 |
| chr10 | 77165992 | 77166341 |
| chr10 | 77166341 | 77166813 |
| chr10 | 77169078 | 77169253 |
| chr10 | 77184646 | 77184917 |
| chr10 | 77193460 | 77193764 |
| chr10 | 77199271 | 77199684 |
| chr10 | 77201989 | 77202278 |
| chr10 | 77206529 | 77206824 |
| chr10 | 77206824 | 77207133 |
| chr10 | 77207133 | 77207430 |
| chr10 | 77211095 | 77211583 |
| chr10 | 77211583 | 77211877 |
| chr10 | 77212458 | 77212692 |
| chr10 | 77218177 | 77218345 |
| chr10 | 77218633 | 77218869 |
| chr10 | 77225454 | 77225604 |
| chr10 | 77235276 | 77235530 |
| chr10 | 77236832 | 77237178 |
| chr10 | 77237195 | 77237435 |
| chr10 | 77237539 | 77237705 |
| chr10 | 77237770 | 77238215 |
| chr10 | 77238303 | 77238565 |
| chr10 | 77246343 | 77246733 |

|       |          |          |
|-------|----------|----------|
| chr10 | 77251168 | 77251573 |
| chr10 | 77251596 | 77252150 |
| chr10 | 77252150 | 77252602 |
| chr10 | 77252861 | 77253156 |
| chr10 | 77258758 | 77259079 |
| chr10 | 77259079 | 77259396 |
| chr10 | 77259396 | 77259745 |
| chr10 | 77260398 | 77260558 |
| chr10 | 77270463 | 77270738 |
| chr10 | 77277676 | 77278153 |
| chr10 | 77282674 | 77282888 |
| chr10 | 77282892 | 77283148 |
| chr10 | 77288678 | 77288854 |
| chr10 | 77300625 | 77301193 |
| chr10 | 77303720 | 77303936 |
| chr10 | 77313988 | 77314153 |
| chr10 | 77314860 | 77315020 |
| chr10 | 77315733 | 77315911 |
| chr10 | 77316139 | 77316289 |
| chr10 | 77321844 | 77322106 |
| chr10 | 77327892 | 77328361 |
| chr10 | 77353401 | 77353725 |
| chr10 | 77360567 | 77360722 |
| chr10 | 77367061 | 77367250 |
| chr10 | 77379295 | 77379565 |
| chr10 | 77381455 | 77381791 |
| chr10 | 77387315 | 77387654 |
| chr10 | 77387654 | 77388011 |
| chr10 | 77388455 | 77388613 |
| chr10 | 77396101 | 77396456 |
| chr10 | 77398134 | 77398464 |
| chr10 | 77402254 | 77403025 |
| chr10 | 77406727 | 77407003 |
| chr10 | 77417716 | 77418055 |
| chr10 | 77418055 | 77418322 |
| chr10 | 77418322 | 77418649 |
| chr10 | 77419343 | 77419661 |
| chr10 | 77420218 | 77420681 |
| chr10 | 77427649 | 77427983 |
| chr10 | 77430613 | 77431113 |
| chr10 | 77434815 | 77434965 |
| chr10 | 77445162 | 77445498 |

|       |          |          |
|-------|----------|----------|
| chr10 | 77447231 | 77447576 |
| chr10 | 77447791 | 77448008 |
| chr10 | 77449293 | 77449608 |
| chr10 | 77454128 | 77454352 |
| chr10 | 77456661 | 77456829 |
| chr10 | 77457594 | 77457854 |
| chr10 | 77457854 | 77458100 |
| chr10 | 77464240 | 77464691 |
| chr10 | 77466014 | 77466327 |
| chr10 | 77470189 | 77470436 |
| chr10 | 77484485 | 77484818 |
| chr10 | 77485967 | 77486123 |
| chr10 | 77486123 | 77486296 |
| chr10 | 77486415 | 77486610 |
| chr10 | 77492195 | 77492520 |
| chr10 | 77509507 | 77510192 |
| chr10 | 77515406 | 77516072 |
| chr10 | 77516075 | 77516248 |
| chr10 | 77516317 | 77516603 |
| chr10 | 77517073 | 77517537 |
| chr10 | 77520670 | 77520856 |
| chr10 | 77524056 | 77524232 |
| chr10 | 77526634 | 77526840 |
| chr10 | 77530932 | 77531492 |
| chr10 | 77531492 | 77532208 |
| chr10 | 77536742 | 77536919 |
| chr10 | 77541766 | 77542054 |
| chr10 | 77542087 | 77542525 |
| chr10 | 77544726 | 77544989 |
| chr10 | 77544989 | 77545288 |
| chr10 | 77556058 | 77556217 |
| chr10 | 77556629 | 77557028 |
| chr10 | 77557028 | 77557413 |
| chr10 | 77557709 | 77557991 |
| chr10 | 77558051 | 77558332 |
| chr10 | 77568615 | 77568878 |
| chr10 | 77568901 | 77569270 |
| chr10 | 77569555 | 77569809 |
| chr10 | 77570013 | 77570654 |
| chr10 | 77570654 | 77570963 |
| chr10 | 77581441 | 77581880 |
| chr10 | 77581880 | 77582291 |

|       |          |          |
|-------|----------|----------|
| chr10 | 77582334 | 77582513 |
| chr10 | 77583491 | 77584108 |
| chr10 | 77590646 | 77591244 |
| chr10 | 77605036 | 77605274 |
| chr10 | 77605363 | 77605636 |
| chr10 | 77605865 | 77606144 |
| chr10 | 77606144 | 77606448 |
| chr10 | 77606448 | 77606826 |
| chr10 | 77606938 | 77607137 |
| chr10 | 77607139 | 77607328 |
| chr10 | 77614784 | 77614997 |
| chr10 | 77616223 | 77616469 |
| chr10 | 77621923 | 77622739 |
| chr10 | 77623185 | 77623461 |
| chr10 | 77623726 | 77623924 |
| chr10 | 77626622 | 77626956 |
| chr10 | 77627586 | 77627841 |
| chr10 | 77630091 | 77630321 |
| chr10 | 77634162 | 77634402 |
| chr10 | 77634906 | 77635127 |
| chr10 | 77643335 | 77643492 |
| chr10 | 77646811 | 77646961 |
| chr10 | 77647122 | 77647272 |
| chr10 | 77656250 | 77656469 |
| chr10 | 77658699 | 77658852 |
| chr10 | 77665630 | 77665782 |
| chr10 | 77665976 | 77666389 |
| chr10 | 77666389 | 77666809 |
| chr10 | 77685959 | 77686264 |
| chr10 | 77686264 | 77686711 |
| chr10 | 77690135 | 77690359 |
| chr10 | 77690601 | 77690751 |
| chr10 | 77693289 | 77693700 |
| chr10 | 77696611 | 77696888 |
| chr10 | 77696888 | 77697217 |
| chr10 | 77700084 | 77700309 |
| chr10 | 77715257 | 77715531 |
| chr10 | 77715712 | 77715985 |
| chr10 | 77715985 | 77716275 |
| chr10 | 77716442 | 77716667 |
| chr10 | 77726433 | 77726600 |
| chr10 | 77726600 | 77726793 |

|       |          |          |
|-------|----------|----------|
| chr10 | 77729344 | 77729541 |
| chr10 | 77741779 | 77742052 |
| chr10 | 77742052 | 77742353 |
| chr10 | 77742521 | 77742689 |
| chr10 | 77749239 | 77749476 |
| chr10 | 77750482 | 77750839 |
| chr10 | 77750973 | 77751149 |
| chr10 | 77751208 | 77751416 |
| chr10 | 77752434 | 77752584 |
| chr10 | 77758965 | 77759413 |
| chr10 | 77759413 | 77759728 |
| chr10 | 77769836 | 77770089 |
| chr10 | 77770608 | 77770882 |
| chr10 | 77770894 | 77771224 |
| chr10 | 77776079 | 77776496 |
| chr10 | 77776496 | 77776835 |
| chr10 | 77781844 | 77782109 |
| chr10 | 77782109 | 77782356 |
| chr10 | 77787514 | 77787749 |
| chr10 | 77787749 | 77788071 |
| chr10 | 77794469 | 77794766 |
| chr10 | 77796873 | 77797078 |
| chr10 | 77798455 | 77798700 |
| chr10 | 77798700 | 77798918 |
| chr10 | 77811157 | 77811428 |
| chr10 | 77811428 | 77811681 |
| chr10 | 77814948 | 77815336 |
| chr10 | 77818495 | 77818667 |
| chr10 | 77818667 | 77818857 |
| chr10 | 77826360 | 77826659 |
| chr10 | 77826659 | 77826932 |
| chr10 | 77826932 | 77827167 |
| chr10 | 77830320 | 77830680 |
| chr10 | 77836348 | 77836613 |
| chr10 | 77849325 | 77849498 |
| chr10 | 77852783 | 77853020 |
| chr10 | 77853031 | 77853262 |
| chr10 | 77853262 | 77853550 |
| chr10 | 77862310 | 77862584 |
| chr10 | 77864333 | 77864943 |
| chr10 | 77876583 | 77876769 |
| chr10 | 77886064 | 77886266 |

|       |          |          |
|-------|----------|----------|
| chr10 | 77893716 | 77893994 |
| chr10 | 77901886 | 77902668 |
| chr10 | 77902668 | 77902931 |
| chr10 | 77902931 | 77903227 |
| chr10 | 77916682 | 77916906 |
| chr10 | 77925557 | 77925732 |
| chr10 | 77926220 | 77926450 |
| chr10 | 77939572 | 77939971 |
| chr10 | 77964074 | 77964242 |
| chr10 | 77966476 | 77966738 |
| chr10 | 77969708 | 77970024 |
| chr10 | 77975673 | 77975934 |
| chr10 | 77978176 | 77978721 |
| chr10 | 77978721 | 77978961 |
| chr10 | 77978961 | 77979199 |
| chr10 | 77984430 | 77984749 |
| chr10 | 77984749 | 77985032 |
| chr10 | 77991307 | 77991558 |
| chr10 | 77993874 | 77994048 |
| chr10 | 77995255 | 77995428 |
| chr10 | 77998890 | 77999040 |
| chr10 | 77999788 | 77999943 |
| chr10 | 78009039 | 78009597 |
| chr10 | 78009597 | 78009973 |
| chr10 | 78009973 | 78010231 |
| chr10 | 78018788 | 78019225 |
| chr10 | 78021422 | 78021612 |
| chr10 | 78025541 | 78025756 |
| chr10 | 78028165 | 78028475 |
| chr10 | 78043378 | 78043690 |
| chr10 | 78069006 | 78069479 |
| chr10 | 78069479 | 78070031 |
| chr10 | 78088365 | 78088594 |
| chr10 | 78091902 | 78092162 |
| chr10 | 78132071 | 78132381 |
| chr10 | 78135035 | 78135230 |
| chr10 | 78135379 | 78135655 |
| chr10 | 78136039 | 78136264 |
| chr10 | 78138883 | 78139080 |
| chr10 | 78154331 | 78154543 |
| chr10 | 78159303 | 78159484 |
| chr10 | 78159984 | 78160275 |



|       |          |          |
|-------|----------|----------|
| chr10 | 78160463 | 78160671 |
| chr10 | 78162711 | 78163011 |
| chr10 | 78163011 | 78163317 |
| chr10 | 78163994 | 78164243 |
| chr10 | 78169460 | 78169879 |
| chr10 | 78169879 | 78170137 |
| chr10 | 78171038 | 78171545 |
| chr10 | 78184589 | 78184974 |
| chr10 | 78184974 | 78185391 |
| chr10 | 78192024 | 78192219 |
| chr10 | 78199847 | 78200060 |
| chr10 | 78200190 | 78200483 |
| chr10 | 78211398 | 78211647 |
| chr10 | 78222969 | 78223279 |
| chr10 | 78226914 | 78227117 |
| chr10 | 78227284 | 78227482 |
| chr10 | 78243991 | 78244457 |
| chr10 | 78244457 | 78244943 |
| chr10 | 78244943 | 78245475 |
| chr10 | 78255717 | 78256100 |
| chr10 | 78267025 | 78267206 |
| chr10 | 78279227 | 78279659 |
| chr10 | 78282502 | 78282748 |
| chr10 | 78297715 | 78298519 |
| chr10 | 78303721 | 78304142 |
| chr10 | 78309908 | 78310115 |
| chr10 | 78311988 | 78312162 |
| chr10 | 78315957 | 78316521 |
| chr10 | 78317360 | 78317548 |
| chr10 | 78322860 | 78323124 |
| chr10 | 78329111 | 78329839 |
| chr10 | 78338135 | 78338691 |
| chr10 | 78342266 | 78342624 |
| chr10 | 78342624 | 78343034 |
| chr10 | 78348305 | 78348540 |
| chr10 | 78351923 | 78352375 |
| chr10 | 78352375 | 78352672 |
| chr10 | 78353571 | 78353901 |
| chr10 | 78360152 | 78360466 |
| chr10 | 78360477 | 78360783 |
| chr10 | 78365859 | 78366174 |
| chr10 | 78371868 | 78372252 |

|       |          |          |
|-------|----------|----------|
| chr10 | 78372694 | 78372939 |
| chr10 | 78392099 | 78392394 |
| chr10 | 78392447 | 78392624 |
| chr10 | 78396236 | 78396591 |
| chr10 | 78402470 | 78402620 |
| chr10 | 78403655 | 78403805 |
| chr10 | 78409447 | 78409721 |
| chr10 | 78412257 | 78412721 |
| chr10 | 78412721 | 78413239 |
| chr10 | 78413264 | 78413414 |
| chr10 | 78417951 | 78418191 |
| chr10 | 78418953 | 78419235 |
| chr10 | 78421016 | 78421335 |
| chr10 | 78425472 | 78425763 |
| chr10 | 78425763 | 78426059 |
| chr10 | 78426298 | 78426704 |
| chr10 | 78428343 | 78428909 |
| chr10 | 78429200 | 78429554 |
| chr10 | 78431001 | 78431168 |
| chr10 | 78438156 | 78438412 |
| chr10 | 78438412 | 78438628 |
| chr10 | 78439620 | 78439915 |
| chr10 | 78440900 | 78441176 |
| chr10 | 78442366 | 78442545 |
| chr10 | 78446256 | 78446597 |
| chr10 | 78447783 | 78447997 |
| chr10 | 78457553 | 78457744 |
| chr10 | 78457854 | 78458229 |
| chr10 | 78458310 | 78458727 |
| chr10 | 78464502 | 78465363 |
| chr10 | 78470721 | 78471648 |
| chr10 | 78484640 | 78484902 |
| chr10 | 78484949 | 78485179 |
| chr10 | 78485443 | 78485849 |
| chr10 | 78485849 | 78486267 |
| chr10 | 78487760 | 78488067 |
| chr10 | 78520346 | 78520553 |
| chr10 | 78520702 | 78520853 |
| chr10 | 78525002 | 78525568 |
| chr10 | 78525571 | 78525846 |
| chr10 | 78525846 | 78526055 |
| chr10 | 78565212 | 78565409 |

|       |          |          |
|-------|----------|----------|
| chr10 | 78565762 | 78565970 |
| chr10 | 78574138 | 78574561 |
| chr10 | 78574561 | 78574856 |
| chr10 | 78574856 | 78575106 |
| chr10 | 78575106 | 78575351 |
| chr10 | 78575351 | 78575594 |
| chr10 | 78575785 | 78576027 |
| chr10 | 78583132 | 78583304 |
| chr10 | 78583304 | 78583496 |
| chr10 | 78590815 | 78591064 |
| chr10 | 78591280 | 78591622 |
| chr10 | 78591622 | 78591831 |
| chr10 | 78591831 | 78592223 |
| chr10 | 78594199 | 78594515 |
| chr10 | 78598564 | 78598915 |
| chr10 | 78605170 | 78605348 |
| chr10 | 78607715 | 78607940 |
| chr10 | 78632017 | 78632181 |
| chr10 | 78632400 | 78632611 |
| chr10 | 78657091 | 78657288 |
| chr10 | 78666336 | 78666642 |
| chr10 | 78666642 | 78666940 |
| chr10 | 78700978 | 78701159 |
| chr10 | 78709959 | 78710110 |
| chr10 | 78722061 | 78722288 |
| chr10 | 78745925 | 78746094 |
| chr10 | 78747029 | 78747203 |
| chr10 | 78752422 | 78752849 |
| chr10 | 78780063 | 78780470 |
| chr10 | 79097111 | 79097506 |
| chr10 | 79097506 | 79097891 |
| chr10 | 79106622 | 79106785 |
| chr10 | 79116599 | 79116801 |
| chr10 | 79295331 | 79295488 |
| chr10 | 79309492 | 79309740 |
| chr10 | 79314332 | 79314600 |
| chr10 | 79321930 | 79322197 |
| chr10 | 79322319 | 79322619 |
| chr10 | 79417225 | 79417438 |
| chr10 | 79493336 | 79493549 |
| chr10 | 79503077 | 79503799 |
| chr10 | 79525423 | 79525664 |

|       |          |          |
|-------|----------|----------|
| chr10 | 79526072 | 79526222 |
| chr10 | 79532726 | 79533103 |
| chr10 | 79533103 | 79533567 |
| chr10 | 79533567 | 79533996 |
| chr10 | 79538842 | 79539260 |
| chr10 | 79547989 | 79548297 |
| chr10 | 79548513 | 79548870 |
| chr10 | 79553951 | 79554112 |
| chr10 | 79554226 | 79554376 |
| chr10 | 79554448 | 79554714 |
| chr10 | 79554714 | 79554989 |
| chr10 | 79554989 | 79555454 |
| chr10 | 79574267 | 79574585 |
| chr10 | 79574585 | 79574855 |
| chr10 | 79580869 | 79581134 |
| chr10 | 79585314 | 79585480 |
| chr10 | 79595268 | 79595547 |
| chr10 | 79595547 | 79595790 |
| chr10 | 79607244 | 79607479 |
| chr10 | 79607883 | 79608191 |
| chr10 | 79612241 | 79612591 |
| chr10 | 79613517 | 79614055 |
| chr10 | 79614055 | 79614499 |
| chr10 | 79620643 | 79620796 |
| chr10 | 79624030 | 79624250 |
| chr10 | 79624261 | 79624421 |
| chr10 | 79625815 | 79626095 |
| chr10 | 79626144 | 79626520 |
| chr10 | 79632771 | 79633057 |
| chr10 | 79633057 | 79633386 |
| chr10 | 79633386 | 79633699 |
| chr10 | 79638923 | 79639092 |
| chr10 | 79649435 | 79649713 |
| chr10 | 79652755 | 79652984 |
| chr10 | 79654888 | 79655380 |
| chr10 | 79658885 | 79659164 |
| chr10 | 79660360 | 79660608 |
| chr10 | 79664076 | 79664376 |
| chr10 | 79668773 | 79669019 |
| chr10 | 79669019 | 79669270 |
| chr10 | 79669270 | 79669606 |
| chr10 | 79669606 | 79670076 |

|       |          |          |
|-------|----------|----------|
| chr10 | 79670166 | 79670326 |
| chr10 | 79672131 | 79672368 |
| chr10 | 79675712 | 79675862 |
| chr10 | 79681195 | 79681439 |
| chr10 | 79681467 | 79682490 |
| chr10 | 79682676 | 79682873 |
| chr10 | 79682917 | 79683159 |
| chr10 | 79683159 | 79683387 |
| chr10 | 79683387 | 79683630 |
| chr10 | 79684477 | 79684691 |
| chr10 | 79688634 | 79688846 |
| chr10 | 79689021 | 79689313 |
| chr10 | 79695272 | 79695541 |
| chr10 | 79696018 | 79696271 |
| chr10 | 79696281 | 79696777 |
| chr10 | 79697037 | 79697361 |
| chr10 | 79698895 | 79699153 |
| chr10 | 79701455 | 79701806 |
| chr10 | 79704084 | 79704629 |
| chr10 | 79704629 | 79704961 |
| chr10 | 79707229 | 79707570 |
| chr10 | 79707751 | 79708189 |
| chr10 | 79712120 | 79712338 |
| chr10 | 79712471 | 79712729 |
| chr10 | 79716517 | 79716725 |
| chr10 | 79716921 | 79717138 |
| chr10 | 79717138 | 79717356 |
| chr10 | 79717682 | 79717868 |
| chr10 | 79717880 | 79718058 |
| chr10 | 79718058 | 79718279 |
| chr10 | 79723341 | 79723496 |
| chr10 | 79726088 | 79726490 |
| chr10 | 79732592 | 79732812 |
| chr10 | 79734039 | 79734189 |
| chr10 | 79737589 | 79737785 |
| chr10 | 79738321 | 79738532 |
| chr10 | 79746088 | 79746254 |
| chr10 | 79746254 | 79746484 |
| chr10 | 79746484 | 79746803 |
| chr10 | 79748757 | 79749024 |
| chr10 | 79754912 | 79755389 |
| chr10 | 79766411 | 79766825 |

|       |          |          |
|-------|----------|----------|
| chr10 | 79766825 | 79767379 |
| chr10 | 79767398 | 79767810 |
| chr10 | 79768459 | 79768710 |
| chr10 | 79777996 | 79778267 |
| chr10 | 79779874 | 79780349 |
| chr10 | 79780349 | 79780557 |
| chr10 | 79780557 | 79781028 |
| chr10 | 79787348 | 79787527 |
| chr10 | 79788470 | 79788633 |
| chr10 | 79793046 | 79793222 |
| chr10 | 79793222 | 79793421 |
| chr10 | 79793421 | 79793934 |
| chr10 | 79798256 | 79798462 |
| chr10 | 79803809 | 79803973 |
| chr10 | 79807040 | 79807342 |
| chr10 | 79811849 | 79812059 |
| chr10 | 79812273 | 79812730 |
| chr10 | 79818180 | 79818617 |
| chr10 | 79823902 | 79824389 |
| chr10 | 79824389 | 79824786 |
| chr10 | 79830383 | 79830568 |
| chr10 | 79834806 | 79835285 |
| chr10 | 79840510 | 79840955 |
| chr10 | 79840955 | 79841303 |
| chr10 | 79841384 | 79841564 |
| chr10 | 79842409 | 79842658 |
| chr10 | 79853230 | 79853412 |
| chr10 | 79853431 | 79853728 |
| chr10 | 79853809 | 79854176 |
| chr10 | 79854176 | 79854701 |
| chr10 | 79854701 | 79854995 |
| chr10 | 79854995 | 79855313 |
| chr10 | 79864408 | 79864776 |
| chr10 | 79864776 | 79865057 |
| chr10 | 79865065 | 79865368 |
| chr10 | 79865368 | 79865706 |
| chr10 | 79865706 | 79865956 |
| chr10 | 79865956 | 79866116 |
| chr10 | 79866116 | 79866391 |
| chr10 | 79866557 | 79866809 |
| chr10 | 79866809 | 79867059 |
| chr10 | 79874297 | 79874492 |

|       |          |          |
|-------|----------|----------|
| chr10 | 79874492 | 79874681 |
| chr10 | 79880802 | 79881025 |
| chr10 | 79882044 | 79882304 |
| chr10 | 79882558 | 79882708 |
| chr10 | 79883676 | 79883956 |
| chr10 | 79883956 | 79884164 |
| chr10 | 79891479 | 79891662 |
| chr10 | 79892643 | 79893096 |
| chr10 | 79893442 | 79893785 |
| chr10 | 79896898 | 79897210 |
| chr10 | 79897431 | 79897581 |
| chr10 | 79900884 | 79901343 |
| chr10 | 79908207 | 79908505 |
| chr10 | 79908505 | 79908789 |
| chr10 | 79908789 | 79909029 |
| chr10 | 79909152 | 79909338 |
| chr10 | 79909338 | 79909574 |
| chr10 | 79914948 | 79915243 |
| chr10 | 79915243 | 79915694 |
| chr10 | 79916025 | 79916440 |
| chr10 | 79916753 | 79917058 |
| chr10 | 79917118 | 79917287 |
| chr10 | 79919593 | 79919764 |
| chr10 | 79925334 | 79925656 |
| chr10 | 79926521 | 79927091 |
| chr10 | 79927091 | 79927337 |
| chr10 | 79927337 | 79927616 |
| chr10 | 79927616 | 79927889 |
| chr10 | 79930498 | 79930702 |
| chr10 | 79934316 | 79934652 |
| chr10 | 79936678 | 79936902 |
| chr10 | 79936902 | 79937186 |
| chr10 | 79937186 | 79937635 |
| chr10 | 79945299 | 79945533 |
| chr10 | 79945533 | 79945887 |
| chr10 | 79945994 | 79946381 |
| chr10 | 79950692 | 79951003 |
| chr10 | 79954001 | 79954205 |
| chr10 | 79958187 | 79958479 |
| chr10 | 79959533 | 79959683 |
| chr10 | 79959763 | 79960023 |
| chr10 | 79960023 | 79960474 |

|       |          |          |
|-------|----------|----------|
| chr10 | 79966220 | 79966370 |
| chr10 | 79966422 | 79966585 |
| chr10 | 79966585 | 79966736 |
| chr10 | 79969418 | 79969624 |
| chr10 | 79970664 | 79971090 |
| chr10 | 79973005 | 79973213 |
| chr10 | 79973256 | 79973433 |
| chr10 | 79979020 | 79979290 |
| chr10 | 79984202 | 79984441 |
| chr10 | 79984487 | 79984814 |
| chr10 | 79984814 | 79985301 |
| chr10 | 79985729 | 79986029 |
| chr10 | 79986232 | 79986595 |
| chr10 | 79986960 | 79987139 |
| chr10 | 79987174 | 79987345 |
| chr10 | 79988525 | 79988675 |
| chr10 | 79989098 | 79989288 |
| chr10 | 79996078 | 79996238 |
| chr10 | 79996255 | 79996584 |
| chr10 | 79996584 | 79996792 |
| chr10 | 79996964 | 79997232 |
| chr10 | 79997232 | 79997508 |
| chr10 | 80003910 | 80004091 |
| chr10 | 80014511 | 80014946 |
| chr10 | 80014970 | 80015226 |
| chr10 | 80015532 | 80015907 |
| chr10 | 80015930 | 80016140 |
| chr10 | 80016359 | 80016738 |
| chr10 | 80018949 | 80019240 |
| chr10 | 80023846 | 80024053 |
| chr10 | 80024097 | 80024504 |
| chr10 | 80024504 | 80024779 |
| chr10 | 80024779 | 80025039 |
| chr10 | 80025988 | 80026220 |
| chr10 | 80028339 | 80028489 |
| chr10 | 80031635 | 80031788 |
| chr10 | 80032767 | 80033120 |
| chr10 | 80033141 | 80033497 |
| chr10 | 80033497 | 80033924 |
| chr10 | 80033924 | 80034381 |
| chr10 | 80039417 | 80039706 |
| chr10 | 80039706 | 80040027 |



|       |          |          |
|-------|----------|----------|
| chr10 | 80044124 | 80044369 |
| chr10 | 80052084 | 80052367 |
| chr10 | 80053267 | 80053776 |
| chr10 | 80053776 | 80054083 |
| chr10 | 80054083 | 80054374 |
| chr10 | 80054397 | 80054843 |
| chr10 | 80063998 | 80064180 |
| chr10 | 80070992 | 80071263 |
| chr10 | 80071263 | 80071603 |
| chr10 | 80072608 | 80073407 |
| chr10 | 80075061 | 80075319 |
| chr10 | 80075319 | 80075653 |
| chr10 | 80076484 | 80076730 |
| chr10 | 80089207 | 80089409 |
| chr10 | 80091597 | 80091764 |
| chr10 | 80091768 | 80091921 |
| chr10 | 80097298 | 80097639 |
| chr10 | 80097639 | 80097892 |
| chr10 | 80098551 | 80098701 |
| chr10 | 80099278 | 80099737 |
| chr10 | 80100960 | 80101417 |
| chr10 | 80102576 | 80102830 |
| chr10 | 80104193 | 80104569 |
| chr10 | 80105502 | 80105671 |
| chr10 | 80105958 | 80106252 |
| chr10 | 80107533 | 80108302 |
| chr10 | 80114584 | 80114875 |
| chr10 | 80115305 | 80115951 |
| chr10 | 80123174 | 80123447 |
| chr10 | 80129654 | 80129877 |
| chr10 | 80130193 | 80130348 |
| chr10 | 80130440 | 80130718 |
| chr10 | 80130734 | 80131069 |
| chr10 | 80136993 | 80137312 |
| chr10 | 80137334 | 80137673 |
| chr10 | 80137673 | 80138022 |
| chr10 | 80138902 | 80139152 |
| chr10 | 80139152 | 80139516 |
| chr10 | 80141288 | 80141676 |
| chr10 | 80142135 | 80142498 |
| chr10 | 80142695 | 80142888 |
| chr10 | 80146050 | 80146205 |

|       |          |          |
|-------|----------|----------|
| chr10 | 80146434 | 80146711 |
| chr10 | 80147686 | 80147989 |
| chr10 | 80147989 | 80148197 |
| chr10 | 80148197 | 80148370 |
| chr10 | 80148370 | 80148582 |
| chr10 | 80148679 | 80149164 |
| chr10 | 80149279 | 80149787 |
| chr10 | 80152945 | 80153174 |
| chr10 | 80156061 | 80156310 |
| chr10 | 80158413 | 80158970 |
| chr10 | 80159227 | 80159635 |
| chr10 | 80159656 | 80159919 |
| chr10 | 80159919 | 80160366 |
| chr10 | 80160795 | 80161112 |
| chr10 | 80161112 | 80161427 |
| chr10 | 80161622 | 80161798 |
| chr10 | 80163765 | 80164106 |
| chr10 | 80164160 | 80164381 |
| chr10 | 80164985 | 80165345 |
| chr10 | 80167225 | 80167411 |
| chr10 | 80167462 | 80168006 |
| chr10 | 80168006 | 80168384 |
| chr10 | 80172790 | 80173048 |
| chr10 | 80173048 | 80173299 |
| chr10 | 80174819 | 80175032 |
| chr10 | 80175580 | 80175805 |
| chr10 | 80176027 | 80176195 |
| chr10 | 80177432 | 80177764 |
| chr10 | 80177764 | 80177997 |
| chr10 | 80179624 | 80179774 |
| chr10 | 80185572 | 80185834 |
| chr10 | 80190449 | 80190788 |
| chr10 | 80190825 | 80191047 |
| chr10 | 80191047 | 80191253 |
| chr10 | 80193306 | 80193524 |
| chr10 | 80193613 | 80193813 |
| chr10 | 80199481 | 80199930 |
| chr10 | 80205561 | 80206001 |
| chr10 | 80215959 | 80216112 |
| chr10 | 80221072 | 80221264 |
| chr10 | 80226195 | 80227092 |
| chr10 | 80244973 | 80245123 |

|       |          |          |
|-------|----------|----------|
| chr10 | 80245627 | 80245942 |
| chr10 | 80247953 | 80248119 |
| chr10 | 80248905 | 80249141 |
| chr10 | 80249141 | 80249760 |
| chr10 | 80253595 | 80253911 |
| chr10 | 80260825 | 80261078 |
| chr10 | 80261078 | 80261285 |
| chr10 | 80261285 | 80261588 |
| chr10 | 80261588 | 80262023 |
| chr10 | 80264722 | 80264945 |
| chr10 | 80264945 | 80265212 |
| chr10 | 80270339 | 80270489 |
| chr10 | 80281902 | 80282056 |
| chr10 | 80282058 | 80282446 |
| chr10 | 80282446 | 80282771 |
| chr10 | 80282927 | 80283698 |
| chr10 | 80292213 | 80292541 |
| chr10 | 80292541 | 80292828 |
| chr10 | 80293584 | 80293749 |
| chr10 | 80295027 | 80295352 |
| chr10 | 80295432 | 80295813 |
| chr10 | 80295813 | 80296086 |
| chr10 | 80302412 | 80302692 |
| chr10 | 80303435 | 80303645 |
| chr10 | 80304762 | 80304960 |
| chr10 | 80304960 | 80305258 |
| chr10 | 80310593 | 80310805 |
| chr10 | 80310805 | 80311161 |
| chr10 | 80314087 | 80314237 |
| chr10 | 80318293 | 80318625 |
| chr10 | 80320424 | 80320726 |
| chr10 | 80322787 | 80322949 |
| chr10 | 80322988 | 80323293 |
| chr10 | 80323293 | 80323654 |
| chr10 | 80323654 | 80324056 |
| chr10 | 80324667 | 80324817 |
| chr10 | 80329358 | 80329749 |
| chr10 | 80329749 | 80330433 |
| chr10 | 80331179 | 80331448 |
| chr10 | 80331657 | 80331906 |
| chr10 | 80340119 | 80340367 |
| chr10 | 80340395 | 80340632 |

|       |          |          |
|-------|----------|----------|
| chr10 | 80342562 | 80343035 |
| chr10 | 80343035 | 80343462 |
| chr10 | 80348331 | 80348873 |
| chr10 | 80349028 | 80349247 |
| chr10 | 80350128 | 80350341 |
| chr10 | 80350341 | 80350651 |
| chr10 | 80356447 | 80356626 |
| chr10 | 80356820 | 80357139 |
| chr10 | 80357515 | 80357711 |
| chr10 | 80357917 | 80358194 |
| chr10 | 80358194 | 80358580 |
| chr10 | 80362701 | 80362983 |
| chr10 | 80363860 | 80364027 |
| chr10 | 80367863 | 80368022 |
| chr10 | 80368477 | 80368721 |
| chr10 | 80370146 | 80370540 |
| chr10 | 80371376 | 80371655 |
| chr10 | 80371655 | 80371903 |
| chr10 | 80374152 | 80374422 |
| chr10 | 80376205 | 80376531 |
| chr10 | 80376895 | 80377062 |
| chr10 | 80382676 | 80383063 |
| chr10 | 80385739 | 80386063 |
| chr10 | 80386165 | 80386383 |
| chr10 | 80386383 | 80386767 |
| chr10 | 80386898 | 80387123 |
| chr10 | 80387518 | 80388074 |
| chr10 | 80398690 | 80399370 |
| chr10 | 80399370 | 80399995 |
| chr10 | 80405835 | 80406123 |
| chr10 | 80406484 | 80406725 |
| chr10 | 80406725 | 80406990 |
| chr10 | 80406990 | 80407376 |
| chr10 | 80412317 | 80412670 |
| chr10 | 80418404 | 80418611 |
| chr10 | 80420924 | 80421079 |
| chr10 | 80423622 | 80423889 |
| chr10 | 80433489 | 80433867 |
| chr10 | 80433891 | 80434370 |
| chr10 | 80435776 | 80436208 |
| chr10 | 80440583 | 80440810 |
| chr10 | 80440965 | 80441161 |

|       |          |          |
|-------|----------|----------|
| chr10 | 80445883 | 80446220 |
| chr10 | 80446220 | 80446733 |
| chr10 | 80450711 | 80450929 |
| chr10 | 80460918 | 80461080 |
| chr10 | 80461386 | 80461719 |
| chr10 | 80464418 | 80464601 |
| chr10 | 80471449 | 80471975 |
| chr10 | 80475244 | 80475597 |
| chr10 | 80475597 | 80475802 |
| chr10 | 80481092 | 80481252 |
| chr10 | 80481946 | 80482186 |
| chr10 | 80483275 | 80483651 |
| chr10 | 80489200 | 80489598 |
| chr10 | 80489598 | 80489903 |
| chr10 | 80490030 | 80490362 |
| chr10 | 80494680 | 80495144 |
| chr10 | 80495144 | 80495567 |
| chr10 | 80495567 | 80495929 |
| chr10 | 80495986 | 80496181 |
| chr10 | 80504870 | 80505136 |
| chr10 | 80506269 | 80506541 |
| chr10 | 80509390 | 80509676 |
| chr10 | 80509710 | 80509896 |
| chr10 | 80509896 | 80510083 |
| chr10 | 80516200 | 80516488 |
| chr10 | 80516607 | 80516767 |
| chr10 | 80516821 | 80517029 |
| chr10 | 80522777 | 80522928 |
| chr10 | 80523372 | 80523531 |
| chr10 | 80526318 | 80526481 |
| chr10 | 80533717 | 80533973 |
| chr10 | 80538213 | 80538522 |
| chr10 | 80538711 | 80539036 |
| chr10 | 80539036 | 80539512 |
| chr10 | 80539547 | 80539736 |
| chr10 | 80539736 | 80539916 |
| chr10 | 80548580 | 80549022 |
| chr10 | 80553976 | 80554192 |
| chr10 | 80556348 | 80556609 |
| chr10 | 80557360 | 80557641 |
| chr10 | 80558825 | 80559001 |
| chr10 | 80560870 | 80561145 |

|       |          |          |
|-------|----------|----------|
| chr10 | 80561145 | 80561443 |
| chr10 | 80561443 | 80561694 |
| chr10 | 80561694 | 80561957 |
| chr10 | 80561957 | 80562184 |
| chr10 | 80566357 | 80566668 |
| chr10 | 80569733 | 80570020 |
| chr10 | 80576417 | 80576684 |
| chr10 | 80576786 | 80577108 |
| chr10 | 80577188 | 80577652 |
| chr10 | 80577652 | 80578118 |
| chr10 | 80578118 | 80578380 |
| chr10 | 80578442 | 80578749 |
| chr10 | 80578944 | 80579227 |
| chr10 | 80583225 | 80583395 |
| chr10 | 80584081 | 80584383 |
| chr10 | 80589215 | 80589662 |
| chr10 | 80589836 | 80590002 |
| chr10 | 80590033 | 80590237 |
| chr10 | 80590237 | 80590509 |
| chr10 | 80590509 | 80590857 |
| chr10 | 80602551 | 80603010 |
| chr10 | 80603010 | 80603368 |
| chr10 | 80604127 | 80604283 |
| chr10 | 80605019 | 80605249 |
| chr10 | 80606474 | 80606672 |
| chr10 | 80611125 | 80611379 |
| chr10 | 80621919 | 80622301 |
| chr10 | 80622301 | 80622699 |
| chr10 | 80622699 | 80623095 |
| chr10 | 80623095 | 80623280 |
| chr10 | 80623558 | 80623778 |
| chr10 | 80627860 | 80628029 |
| chr10 | 80637434 | 80637677 |
| chr10 | 80639417 | 80639577 |
| chr10 | 80642332 | 80642522 |
| chr10 | 80642758 | 80643103 |
| chr10 | 80643312 | 80643521 |
| chr10 | 80643930 | 80644219 |
| chr10 | 80647047 | 80647230 |
| chr10 | 80653217 | 80653531 |
| chr10 | 80656151 | 80656513 |
| chr10 | 80656513 | 80656881 |

|       |          |          |
|-------|----------|----------|
| chr10 | 80656881 | 80657107 |
| chr10 | 80657107 | 80657329 |
| chr10 | 80658911 | 80659086 |
| chr10 | 80659310 | 80659462 |
| chr10 | 80664516 | 80665072 |
| chr10 | 80665088 | 80665355 |
| chr10 | 80665553 | 80665845 |
| chr10 | 80668638 | 80668992 |
| chr10 | 80669690 | 80669902 |
| chr10 | 80670123 | 80670425 |
| chr10 | 80676073 | 80676597 |
| chr10 | 80676597 | 80676904 |
| chr10 | 80677191 | 80677477 |
| chr10 | 80677953 | 80678496 |
| chr10 | 80679591 | 80679841 |
| chr10 | 80684266 | 80684572 |
| chr10 | 80687910 | 80688208 |
| chr10 | 80695258 | 80695560 |
| chr10 | 80701724 | 80702100 |
| chr10 | 80702100 | 80702433 |
| chr10 | 80702454 | 80702853 |
| chr10 | 80716828 | 80717348 |
| chr10 | 80717348 | 80717708 |
| chr10 | 80726227 | 80726509 |
| chr10 | 80727766 | 80728075 |
| chr10 | 80741969 | 80742215 |
| chr10 | 80742215 | 80742667 |
| chr10 | 80744342 | 80744623 |
| chr10 | 80747497 | 80747719 |
| chr10 | 80751207 | 80751861 |
| chr10 | 80751879 | 80752361 |
| chr10 | 80752361 | 80752679 |
| chr10 | 80754909 | 80755294 |
| chr10 | 80757627 | 80758076 |
| chr10 | 80758641 | 80759065 |
| chr10 | 80763443 | 80764093 |
| chr10 | 80764288 | 80764637 |
| chr10 | 80766388 | 80766697 |
| chr10 | 80774285 | 80774606 |
| chr10 | 80774606 | 80774934 |
| chr10 | 80774934 | 80775115 |
| chr10 | 80776460 | 80776895 |

|       |          |          |
|-------|----------|----------|
| chr10 | 80779648 | 80779938 |
| chr10 | 80786987 | 80787198 |
| chr10 | 80791838 | 80792087 |
| chr10 | 80792540 | 80792700 |
| chr10 | 80797482 | 80797659 |
| chr10 | 80797676 | 80798172 |
| chr10 | 80798172 | 80798446 |
| chr10 | 80798446 | 80798747 |
| chr10 | 80798747 | 80799041 |
| chr10 | 80805732 | 80805956 |
| chr10 | 80805956 | 80806387 |
| chr10 | 80812095 | 80812404 |
| chr10 | 80813532 | 80813795 |
| chr10 | 80814296 | 80814451 |
| chr10 | 80814694 | 80814865 |
| chr10 | 80817196 | 80817466 |
| chr10 | 80818065 | 80818273 |
| chr10 | 80826121 | 80826776 |
| chr10 | 80826841 | 80827171 |
| chr10 | 80838387 | 80838863 |
| chr10 | 80843965 | 80844219 |
| chr10 | 80844324 | 80844475 |
| chr10 | 80848558 | 80849084 |
| chr10 | 80853813 | 80854017 |
| chr10 | 80854517 | 80854667 |
| chr10 | 80854686 | 80854876 |
| chr10 | 80854876 | 80855142 |
| chr10 | 80855142 | 80855554 |
| chr10 | 80855618 | 80856070 |
| chr10 | 80856253 | 80856534 |
| chr10 | 80865855 | 80866005 |
| chr10 | 80871597 | 80871906 |
| chr10 | 80876121 | 80876346 |
| chr10 | 80878344 | 80878663 |
| chr10 | 80880398 | 80880670 |
| chr10 | 80880706 | 80880867 |
| chr10 | 80881009 | 80881210 |
| chr10 | 80881374 | 80881613 |
| chr10 | 80887153 | 80887595 |
| chr10 | 80888297 | 80888471 |
| chr10 | 80895077 | 80895263 |
| chr10 | 80900241 | 80900481 |



|       |          |          |
|-------|----------|----------|
| chr10 | 80900481 | 80900758 |
| chr10 | 80900758 | 80901200 |
| chr10 | 80906828 | 80907022 |
| chr10 | 80907022 | 80907237 |
| chr10 | 80914228 | 80914394 |
| chr10 | 80917083 | 80917642 |
| chr10 | 80917642 | 80917912 |
| chr10 | 80917912 | 80918144 |
| chr10 | 80918144 | 80918404 |
| chr10 | 80923573 | 80923739 |
| chr10 | 80928574 | 80928970 |
| chr10 | 80929058 | 80929352 |
| chr10 | 80929766 | 80930163 |
| chr10 | 80930324 | 80930599 |
| chr10 | 80931214 | 80931518 |
| chr10 | 80933176 | 80933550 |
| chr10 | 80933595 | 80933978 |
| chr10 | 80936641 | 80936844 |
| chr10 | 80937729 | 80938067 |
| chr10 | 80939184 | 80939488 |
| chr10 | 80939570 | 80939972 |
| chr10 | 80940449 | 80941058 |
| chr10 | 80946573 | 80946907 |
| chr10 | 80947098 | 80947388 |
| chr10 | 80947434 | 80947747 |
| chr10 | 80947821 | 80948135 |
| chr10 | 80948135 | 80948510 |
| chr10 | 80948574 | 80948963 |
| chr10 | 80949155 | 80949402 |
| chr10 | 80955029 | 80955402 |
| chr10 | 80955402 | 80955700 |
| chr10 | 80955700 | 80955985 |
| chr10 | 80960846 | 80961175 |
| chr10 | 80961175 | 80961865 |
| chr10 | 80966403 | 80966564 |
| chr10 | 80967316 | 80967686 |
| chr10 | 80985583 | 80986125 |
| chr10 | 80987832 | 80988416 |
| chr10 | 80992028 | 80992259 |
| chr10 | 80993259 | 80993516 |
| chr10 | 80995110 | 80995260 |
| chr10 | 80995285 | 80995552 |

|       |          |          |
|-------|----------|----------|
| chr10 | 80998836 | 80999158 |
| chr10 | 80999746 | 81000226 |
| chr10 | 81000758 | 81000910 |
| chr10 | 81001386 | 81001539 |
| chr10 | 81007302 | 81007546 |
| chr10 | 81014488 | 81014647 |
| chr10 | 81014777 | 81015258 |
| chr10 | 81016739 | 81016960 |
| chr10 | 81018453 | 81018638 |
| chr10 | 81020259 | 81020532 |
| chr10 | 81024638 | 81024870 |
| chr10 | 81025049 | 81025273 |
| chr10 | 81025273 | 81025491 |
| chr10 | 81027308 | 81027692 |
| chr10 | 81036900 | 81037602 |
| chr10 | 81041570 | 81041722 |
| chr10 | 81043869 | 81044033 |
| chr10 | 81044033 | 81044197 |
| chr10 | 81044553 | 81044885 |
| chr10 | 81050687 | 81050969 |
| chr10 | 81050969 | 81051184 |
| chr10 | 81052597 | 81052903 |
| chr10 | 81059580 | 81059851 |
| chr10 | 81060049 | 81060282 |
| chr10 | 81060282 | 81060576 |
| chr10 | 81064686 | 81064975 |
| chr10 | 81065449 | 81065797 |
| chr10 | 81065940 | 81066177 |
| chr10 | 81069748 | 81070021 |
| chr10 | 81070021 | 81070304 |
| chr10 | 81076220 | 81076752 |
| chr10 | 81082149 | 81082608 |
| chr10 | 81082656 | 81082816 |
| chr10 | 81087103 | 81087264 |
| chr10 | 81088859 | 81089065 |
| chr10 | 81095004 | 81095235 |
| chr10 | 81095235 | 81095804 |
| chr10 | 81101458 | 81101808 |
| chr10 | 81102469 | 81102835 |
| chr10 | 81105539 | 81105710 |
| chr10 | 81105735 | 81106096 |
| chr10 | 81106096 | 81106409 |

|       |          |          |
|-------|----------|----------|
| chr10 | 81106409 | 81106809 |
| chr10 | 81112995 | 81113365 |
| chr10 | 81118957 | 81119181 |
| chr10 | 81128434 | 81128932 |
| chr10 | 81128932 | 81129284 |
| chr10 | 81129284 | 81129576 |
| chr10 | 81129576 | 81129748 |
| chr10 | 81135913 | 81136271 |
| chr10 | 81136271 | 81136667 |
| chr10 | 81136910 | 81137126 |
| chr10 | 81137236 | 81137687 |
| chr10 | 81137687 | 81138094 |
| chr10 | 81138094 | 81138339 |
| chr10 | 81138339 | 81138529 |
| chr10 | 81143160 | 81143581 |
| chr10 | 81145747 | 81146054 |
| chr10 | 81146054 | 81146352 |
| chr10 | 81146352 | 81146697 |
| chr10 | 81152351 | 81152634 |
| chr10 | 81152634 | 81152954 |
| chr10 | 81154281 | 81154453 |
| chr10 | 81162082 | 81162303 |
| chr10 | 81162370 | 81162565 |
| chr10 | 81167401 | 81167645 |
| chr10 | 81167645 | 81167988 |
| chr10 | 81167988 | 81168301 |
| chr10 | 81168816 | 81169226 |
| chr10 | 81169226 | 81169620 |
| chr10 | 81173155 | 81173418 |
| chr10 | 81174719 | 81174879 |
| chr10 | 81175051 | 81175342 |
| chr10 | 81176365 | 81176575 |
| chr10 | 81176575 | 81176774 |
| chr10 | 81176774 | 81176968 |
| chr10 | 81176968 | 81177174 |
| chr10 | 81182339 | 81183385 |
| chr10 | 81184900 | 81185170 |
| chr10 | 81190184 | 81190442 |
| chr10 | 81190896 | 81191169 |
| chr10 | 81192298 | 81192611 |
| chr10 | 81192611 | 81192984 |
| chr10 | 81193021 | 81193291 |

|       |          |          |
|-------|----------|----------|
| chr10 | 81197354 | 81197541 |
| chr10 | 81198269 | 81198528 |
| chr10 | 81202421 | 81202749 |
| chr10 | 81203408 | 81203615 |
| chr10 | 81208079 | 81208242 |
| chr10 | 81216845 | 81216998 |
| chr10 | 81217367 | 81217585 |
| chr10 | 81217955 | 81218401 |
| chr10 | 81221519 | 81221672 |
| chr10 | 81232900 | 81233612 |
| chr10 | 81234321 | 81234548 |
| chr10 | 81240954 | 81241191 |
| chr10 | 81244479 | 81244683 |
| chr10 | 81244683 | 81244932 |
| chr10 | 81252570 | 81252726 |
| chr10 | 81253104 | 81253433 |
| chr10 | 81256476 | 81256638 |
| chr10 | 81256642 | 81256858 |
| chr10 | 81257690 | 81257948 |
| chr10 | 81257948 | 81258196 |
| chr10 | 81259572 | 81259802 |
| chr10 | 81266303 | 81266453 |
| chr10 | 81266494 | 81266788 |
| chr10 | 81266788 | 81267056 |
| chr10 | 81268045 | 81268421 |
| chr10 | 81274291 | 81274475 |
| chr10 | 81277097 | 81277259 |
| chr10 | 81279595 | 81279774 |
| chr10 | 81284864 | 81285014 |
| chr10 | 81285562 | 81286070 |
| chr10 | 81286185 | 81286417 |
| chr10 | 81289358 | 81289590 |
| chr10 | 81292490 | 81292781 |
| chr10 | 81292781 | 81293090 |
| chr10 | 81293090 | 81293569 |
| chr10 | 81294524 | 81294677 |
| chr10 | 81297954 | 81298244 |
| chr10 | 81298530 | 81298684 |
| chr10 | 81298848 | 81299015 |
| chr10 | 81303385 | 81303540 |
| chr10 | 81304843 | 81305190 |
| chr10 | 81314329 | 81314521 |

|       |          |          |
|-------|----------|----------|
| chr10 | 81319763 | 81319974 |
| chr10 | 81320045 | 81321066 |
| chr10 | 81321074 | 81321342 |
| chr10 | 81321381 | 81321688 |
| chr10 | 81328181 | 81328478 |
| chr10 | 81330885 | 81331035 |
| chr10 | 81335338 | 81335606 |
| chr10 | 81336174 | 81336307 |
| chr10 | 81336307 | 81336500 |
| chr10 | 81341088 | 81341285 |
| chr10 | 81341624 | 81341900 |
| chr10 | 81343307 | 81343519 |
| chr10 | 81344562 | 81344750 |
| chr10 | 81346742 | 81346946 |
| chr10 | 81349167 | 81349439 |
| chr10 | 81350026 | 81350769 |
| chr10 | 81350769 | 81351082 |
| chr10 | 81357317 | 81357618 |
| chr10 | 81357618 | 81357837 |
| chr10 | 81357837 | 81358173 |
| chr10 | 81358314 | 81358472 |
| chr10 | 81358472 | 81358616 |
| chr10 | 81360170 | 81360482 |
| chr10 | 81362560 | 81362711 |
| chr10 | 81362711 | 81362870 |
| chr10 | 81365676 | 81365994 |
| chr10 | 81365994 | 81366309 |
| chr10 | 81366309 | 81366664 |
| chr10 | 81367885 | 81368223 |
| chr10 | 81377031 | 81377202 |
| chr10 | 81377881 | 81378116 |
| chr10 | 81378116 | 81378342 |
| chr10 | 81378342 | 81378627 |
| chr10 | 81378627 | 81379142 |
| chr10 | 81384089 | 81384576 |
| chr10 | 81384576 | 81384915 |
| chr10 | 81384984 | 81385313 |
| chr10 | 81389835 | 81390270 |
| chr10 | 81395032 | 81395182 |
| chr10 | 81395209 | 81395503 |
| chr10 | 81398135 | 81398292 |
| chr10 | 81401682 | 81402026 |

|       |          |          |
|-------|----------|----------|
| chr10 | 81405969 | 81406124 |
| chr10 | 81407572 | 81407906 |
| chr10 | 81408808 | 81409082 |
| chr10 | 81409082 | 81409320 |
| chr10 | 81409428 | 81409783 |
| chr10 | 81410421 | 81410676 |
| chr10 | 81411811 | 81412002 |
| chr10 | 81416606 | 81416779 |
| chr10 | 81416798 | 81417152 |
| chr10 | 81424351 | 81424545 |
| chr10 | 81424658 | 81425118 |
| chr10 | 81425136 | 81425307 |
| chr10 | 81425319 | 81425666 |
| chr10 | 81426950 | 81427255 |
| chr10 | 81429577 | 81429844 |
| chr10 | 81429844 | 81430088 |
| chr10 | 81430088 | 81430297 |
| chr10 | 81430297 | 81430488 |
| chr10 | 81430559 | 81430736 |
| chr10 | 81431111 | 81431287 |
| chr10 | 81431679 | 81432077 |
| chr10 | 81432885 | 81433252 |
| chr10 | 81434913 | 81435270 |
| chr10 | 81441109 | 81441327 |
| chr10 | 81443416 | 81443704 |
| chr10 | 81443772 | 81443941 |
| chr10 | 81450027 | 81450504 |
| chr10 | 81452395 | 81452755 |
| chr10 | 81452755 | 81453443 |
| chr10 | 81457302 | 81457572 |
| chr10 | 81464363 | 81464834 |
| chr10 | 81464834 | 81465248 |
| chr10 | 81465248 | 81465697 |
| chr10 | 81474555 | 81474713 |
| chr10 | 81477625 | 81477864 |
| chr10 | 81482243 | 81482393 |
| chr10 | 81482404 | 81482822 |
| chr10 | 81482822 | 81483054 |
| chr10 | 81484041 | 81484319 |
| chr10 | 81485171 | 81485372 |
| chr10 | 81495891 | 81496316 |
| chr10 | 81496316 | 81496683 |

|       |          |          |
|-------|----------|----------|
| chr10 | 81496683 | 81496947 |
| chr10 | 81502677 | 81503117 |
| chr10 | 81503868 | 81504132 |
| chr10 | 81506016 | 81506174 |
| chr10 | 81508214 | 81508400 |
| chr10 | 81508589 | 81508795 |
| chr10 | 81518409 | 81518559 |
| chr10 | 81518600 | 81518875 |
| chr10 | 81523460 | 81523876 |
| chr10 | 81523930 | 81524343 |
| chr10 | 81526785 | 81527094 |
| chr10 | 81534787 | 81535129 |
| chr10 | 81536791 | 81537037 |
| chr10 | 81537081 | 81537378 |
| chr10 | 81544444 | 81544768 |
| chr10 | 81544808 | 81545285 |
| chr10 | 81545285 | 81545794 |
| chr10 | 81550328 | 81550479 |
| chr10 | 81551493 | 81552135 |
| chr10 | 81559144 | 81559371 |
| chr10 | 81559371 | 81559616 |
| chr10 | 81559616 | 81559951 |
| chr10 | 81559951 | 81560289 |
| chr10 | 81560289 | 81560545 |
| chr10 | 81560545 | 81560781 |
| chr10 | 81560915 | 81561382 |
| chr10 | 81563552 | 81563734 |
| chr10 | 81564826 | 81565051 |
| chr10 | 81570732 | 81571159 |
| chr10 | 81571513 | 81572077 |
| chr10 | 81572315 | 81572466 |
| chr10 | 81575177 | 81575401 |
| chr10 | 81580341 | 81580502 |
| chr10 | 81580882 | 81581032 |
| chr10 | 81591689 | 81591928 |
| chr10 | 81591928 | 81592347 |
| chr10 | 81600735 | 81601229 |
| chr10 | 81605125 | 81605507 |
| chr10 | 81605842 | 81606455 |
| chr10 | 81606477 | 81606735 |
| chr10 | 81612679 | 81613185 |
| chr10 | 81623492 | 81623676 |

|       |          |          |
|-------|----------|----------|
| chr10 | 81626152 | 81626329 |
| chr10 | 81626743 | 81626893 |
| chr10 | 81627066 | 81627508 |
| chr10 | 81627508 | 81627853 |
| chr10 | 81627874 | 81628045 |
| chr10 | 81633327 | 81634046 |
| chr10 | 81643082 | 81643505 |
| chr10 | 81643505 | 81644108 |
| chr10 | 81646088 | 81646316 |
| chr10 | 81648734 | 81649139 |
| chr10 | 81649139 | 81649401 |
| chr10 | 81649401 | 81649731 |
| chr10 | 81687054 | 81687484 |
| chr10 | 81687484 | 81687746 |
| chr10 | 81687746 | 81687942 |
| chr10 | 81704409 | 81704901 |
| chr10 | 81704901 | 81705274 |
| chr10 | 81770569 | 81770814 |
| chr10 | 81770814 | 81771080 |
| chr10 | 81771080 | 81771416 |
| chr10 | 81811921 | 81812266 |
| chr10 | 81812266 | 81812667 |
| chr10 | 81846188 | 81846590 |
| chr10 | 81846590 | 81846863 |
| chr10 | 81846863 | 81847047 |
| chr10 | 81863518 | 81864008 |
| chr10 | 81864008 | 81864393 |
| chr10 | 81929907 | 81930149 |
| chr10 | 81930149 | 81930421 |
| chr10 | 81930421 | 81930768 |
| chr10 | 81978414 | 81978750 |
| chr10 | 81978750 | 81979062 |
| chr10 | 81996626 | 81997115 |
| chr10 | 81997115 | 81997526 |
| chr10 | 82004851 | 82005136 |
| chr10 | 82047712 | 82047874 |
| chr10 | 82047895 | 82048227 |
| chr10 | 82048227 | 82048515 |
| chr10 | 82048515 | 82048757 |
| chr10 | 82083078 | 82083421 |
| chr10 | 82083421 | 82083696 |
| chr10 | 82083696 | 82083928 |



|       |          |          |
|-------|----------|----------|
| chr10 | 82127758 | 82128122 |
| chr10 | 82128122 | 82128599 |
| chr10 | 82161475 | 82161639 |
| chr10 | 82177943 | 82178206 |
| chr10 | 82178206 | 82178482 |
| chr10 | 82178482 | 82178982 |
| chr10 | 82240685 | 82241172 |
| chr10 | 82241172 | 82241515 |
| chr10 | 82354045 | 82354391 |
| chr10 | 82354391 | 82354676 |
| chr10 | 82354676 | 82354894 |
| chr10 | 82359616 | 82359802 |
| chr10 | 82359802 | 82360049 |
| chr10 | 82360079 | 82360407 |
| chr10 | 82409520 | 82409969 |
| chr10 | 82428282 | 82428452 |
| chr10 | 82440723 | 82441104 |
| chr10 | 82497128 | 82497310 |
| chr10 | 82505220 | 82505386 |
| chr10 | 82514643 | 82514859 |
| chr10 | 82520099 | 82520286 |
| chr10 | 82567057 | 82567260 |
| chr10 | 82622470 | 82623030 |
| chr10 | 82623030 | 82623253 |
| chr10 | 82623253 | 82623571 |
| chr10 | 82629325 | 82629551 |
| chr10 | 82629564 | 82629993 |
| chr10 | 82629993 | 82630356 |
| chr10 | 82631050 | 82631287 |
| chr10 | 82646187 | 82646373 |
| chr10 | 82666447 | 82666847 |
| chr10 | 82666847 | 82667174 |
| chr10 | 82689699 | 82690356 |
| chr10 | 82695968 | 82696270 |
| chr10 | 82696569 | 82696720 |
| chr10 | 82697333 | 82697483 |
| chr10 | 82698663 | 82699224 |
| chr10 | 82699224 | 82699669 |
| chr10 | 82699676 | 82699984 |
| chr10 | 82747083 | 82747293 |
| chr10 | 82747293 | 82747493 |
| chr10 | 82747493 | 82747680 |

|       |          |          |
|-------|----------|----------|
| chr10 | 82761113 | 82761397 |
| chr10 | 82761397 | 82761701 |
| chr10 | 82763740 | 82764386 |
| chr10 | 82771202 | 82771373 |
| chr10 | 82771539 | 82771694 |
| chr10 | 82777136 | 82777354 |
| chr10 | 82777888 | 82778056 |
| chr10 | 82778056 | 82778225 |
| chr10 | 82780316 | 82780696 |
| chr10 | 82782580 | 82782736 |
| chr10 | 82789255 | 82789520 |
| chr10 | 82790499 | 82790885 |
| chr10 | 82795057 | 82795369 |
| chr10 | 82795369 | 82795734 |
| chr10 | 82798463 | 82798926 |
| chr10 | 82804536 | 82804701 |
| chr10 | 82807276 | 82807498 |
| chr10 | 82811842 | 82812375 |
| chr10 | 82813968 | 82814584 |
| chr10 | 82814680 | 82814839 |
| chr10 | 82824518 | 82824935 |
| chr10 | 82826067 | 82826279 |
| chr10 | 82838507 | 82838782 |
| chr10 | 82839213 | 82839420 |
| chr10 | 82844728 | 82845160 |
| chr10 | 82850799 | 82850966 |
| chr10 | 82851591 | 82851819 |
| chr10 | 82851819 | 82852146 |
| chr10 | 82858423 | 82858821 |
| chr10 | 82858821 | 82859562 |
| chr10 | 82859681 | 82859875 |
| chr10 | 82860384 | 82860690 |
| chr10 | 82863169 | 82863484 |
| chr10 | 82863918 | 82864166 |
| chr10 | 82866905 | 82867055 |
| chr10 | 82868392 | 82868692 |
| chr10 | 82871065 | 82871220 |
| chr10 | 82876071 | 82876386 |
| chr10 | 82877368 | 82877520 |
| chr10 | 82880419 | 82880604 |
| chr10 | 82882031 | 82882252 |
| chr10 | 82888706 | 82888880 |

|       |          |          |
|-------|----------|----------|
| chr10 | 82890342 | 82890590 |
| chr10 | 82890885 | 82891039 |
| chr10 | 82891455 | 82891660 |
| chr10 | 82898955 | 82899142 |
| chr10 | 82899472 | 82899642 |
| chr10 | 82899737 | 82900007 |
| chr10 | 82900007 | 82900347 |
| chr10 | 82900347 | 82900697 |
| chr10 | 82900697 | 82900952 |
| chr10 | 82901488 | 82901773 |
| chr10 | 82909371 | 82909603 |
| chr10 | 82909631 | 82909785 |
| chr10 | 82910319 | 82910480 |
| chr10 | 82913779 | 82914023 |
| chr10 | 82914039 | 82914249 |
| chr10 | 82953472 | 82953763 |
| chr10 | 82955218 | 82955423 |
| chr10 | 82958609 | 82958801 |
| chr10 | 82961433 | 82961607 |
| chr10 | 82962356 | 82963094 |
| chr10 | 82975697 | 82975979 |
| chr10 | 82975979 | 82976273 |
| chr10 | 82984910 | 82985422 |
| chr10 | 82985422 | 82985995 |
| chr10 | 82990724 | 82990972 |
| chr10 | 83036337 | 83036579 |
| chr10 | 83038333 | 83038527 |
| chr10 | 83073256 | 83073416 |
| chr10 | 83095440 | 83095614 |
| chr10 | 83104403 | 83104623 |
| chr10 | 83131985 | 83132192 |
| chr10 | 83144245 | 83144553 |
| chr10 | 83152343 | 83152682 |
| chr10 | 83178151 | 83178334 |
| chr10 | 83196320 | 83196480 |
| chr10 | 83197869 | 83198035 |
| chr10 | 83199410 | 83199626 |
| chr10 | 83215571 | 83215756 |
| chr10 | 83219779 | 83220010 |
| chr10 | 83249049 | 83249241 |
| chr10 | 83320797 | 83321189 |
| chr10 | 83337104 | 83337675 |

|       |          |          |
|-------|----------|----------|
| chr10 | 83337675 | 83338014 |
| chr10 | 83343214 | 83343705 |
| chr10 | 83343830 | 83344122 |
| chr10 | 83354414 | 83354645 |
| chr10 | 83359904 | 83360310 |
| chr10 | 83360310 | 83360576 |
| chr10 | 83360576 | 83360875 |
| chr10 | 83374626 | 83374776 |
| chr10 | 83388143 | 83388297 |
| chr10 | 83389585 | 83389778 |
| chr10 | 83509029 | 83509222 |
| chr10 | 83533310 | 83533621 |
| chr10 | 83533642 | 83533947 |
| chr10 | 83533947 | 83534396 |
| chr10 | 83543577 | 83543795 |
| chr10 | 83543795 | 83544080 |
| chr10 | 83544080 | 83544447 |
| chr10 | 83617422 | 83617661 |
| chr10 | 83618900 | 83619432 |
| chr10 | 83624880 | 83625231 |
| chr10 | 83626584 | 83627112 |
| chr10 | 83629541 | 83629731 |
| chr10 | 83634595 | 83634809 |
| chr10 | 83636322 | 83636482 |
| chr10 | 83637341 | 83637641 |
| chr10 | 83644912 | 83645324 |
| chr10 | 83645324 | 83645589 |
| chr10 | 83648158 | 83648982 |
| chr10 | 83658665 | 83658854 |
| chr10 | 83659190 | 83659374 |
| chr10 | 83666745 | 83666898 |
| chr10 | 83688338 | 83688498 |
| chr10 | 83699444 | 83699691 |
| chr10 | 83722557 | 83723143 |
| chr10 | 83723152 | 83723305 |
| chr10 | 83729584 | 83729819 |
| chr10 | 83733737 | 83733965 |
| chr10 | 83757644 | 83757931 |
| chr10 | 83776634 | 83776784 |
| chr10 | 83788523 | 83788822 |
| chr10 | 83819731 | 83819961 |
| chr10 | 83820942 | 83821473 |

|       |          |          |
|-------|----------|----------|
| chr10 | 83854405 | 83854601 |
| chr10 | 83861551 | 83861808 |
| chr10 | 83898550 | 83898722 |
| chr10 | 83906706 | 83907123 |
| chr10 | 83909037 | 83909344 |
| chr10 | 83934398 | 83934898 |
| chr10 | 83958763 | 83959017 |
| chr10 | 83970317 | 83970521 |
| chr10 | 83984817 | 83985088 |
| chr10 | 83985088 | 83985721 |
| chr10 | 83996598 | 83996789 |
| chr10 | 84021084 | 84021781 |
| chr10 | 84044938 | 84045115 |
| chr10 | 84056235 | 84056702 |
| chr10 | 84060685 | 84060950 |
| chr10 | 84065512 | 84065716 |
| chr10 | 84075648 | 84075926 |
| chr10 | 84088027 | 84088235 |
| chr10 | 84090491 | 84090692 |
| chr10 | 84097623 | 84097926 |
| chr10 | 84101082 | 84101676 |
| chr10 | 84109804 | 84109998 |
| chr10 | 84146687 | 84146930 |
| chr10 | 84166655 | 84166815 |
| chr10 | 84194073 | 84194656 |
| chr10 | 84212982 | 84213303 |
| chr10 | 84217573 | 84217908 |
| chr10 | 84230377 | 84230606 |
| chr10 | 84234994 | 84235317 |
| chr10 | 84235317 | 84235528 |
| chr10 | 84240352 | 84240572 |
| chr10 | 84255000 | 84255164 |
| chr10 | 84276031 | 84276449 |
| chr10 | 84286302 | 84286452 |
| chr10 | 84291047 | 84291214 |
| chr10 | 84291722 | 84291971 |
| chr10 | 84295536 | 84295693 |
| chr10 | 84302843 | 84303169 |
| chr10 | 84303169 | 84303447 |
| chr10 | 84304336 | 84304516 |
| chr10 | 84305363 | 84305633 |
| chr10 | 84310736 | 84310992 |

|       |          |          |
|-------|----------|----------|
| chr10 | 84311911 | 84312126 |
| chr10 | 84312703 | 84312873 |
| chr10 | 84313620 | 84313784 |
| chr10 | 84334981 | 84335148 |
| chr10 | 84339438 | 84339967 |
| chr10 | 84353429 | 84353773 |
| chr10 | 84376355 | 84376728 |
| chr10 | 84376728 | 84376977 |
| chr10 | 84386310 | 84386510 |
| chr10 | 84392023 | 84392384 |
| chr10 | 84392384 | 84392955 |
| chr10 | 84395867 | 84396205 |
| chr10 | 84396205 | 84396458 |
| chr10 | 84400111 | 84400365 |
| chr10 | 84401276 | 84401548 |
| chr10 | 84401771 | 84402092 |
| chr10 | 84409020 | 84409767 |
| chr10 | 84412864 | 84413125 |
| chr10 | 84415872 | 84416022 |
| chr10 | 84416676 | 84417055 |
| chr10 | 84418347 | 84418516 |
| chr10 | 84428757 | 84429103 |
| chr10 | 84429103 | 84429459 |
| chr10 | 84436053 | 84436484 |
| chr10 | 84438101 | 84438332 |
| chr10 | 84440236 | 84440498 |
| chr10 | 84440498 | 84440948 |
| chr10 | 84440948 | 84441469 |
| chr10 | 84441531 | 84441682 |
| chr10 | 84444505 | 84444710 |
| chr10 | 84448750 | 84448928 |
| chr10 | 84450574 | 84450781 |
| chr10 | 84450781 | 84451090 |
| chr10 | 84460779 | 84460975 |
| chr10 | 84467987 | 84468208 |
| chr10 | 84483165 | 84483463 |
| chr10 | 84483583 | 84483974 |
| chr10 | 84485520 | 84485812 |
| chr10 | 84487235 | 84487467 |
| chr10 | 84488396 | 84488614 |
| chr10 | 84493828 | 84493991 |
| chr10 | 84494329 | 84494837 |

|       |          |          |
|-------|----------|----------|
| chr10 | 84496490 | 84496788 |
| chr10 | 84500272 | 84500686 |
| chr10 | 84501241 | 84501444 |
| chr10 | 84505259 | 84505442 |
| chr10 | 84514158 | 84514426 |
| chr10 | 84515498 | 84515760 |
| chr10 | 84515760 | 84516004 |
| chr10 | 84516100 | 84516386 |
| chr10 | 84516386 | 84516756 |
| chr10 | 84523847 | 84524023 |
| chr10 | 84530413 | 84530753 |
| chr10 | 84530806 | 84530999 |
| chr10 | 84532192 | 84532539 |
| chr10 | 84532847 | 84533380 |
| chr10 | 84533380 | 84533778 |
| chr10 | 84533839 | 84534356 |
| chr10 | 84539763 | 84540149 |
| chr10 | 84542751 | 84542997 |
| chr10 | 84545286 | 84545508 |
| chr10 | 84548113 | 84548487 |
| chr10 | 84551923 | 84552162 |
| chr10 | 84560430 | 84560612 |
| chr10 | 84562723 | 84563152 |
| chr10 | 84570973 | 84571515 |
| chr10 | 84574936 | 84575155 |
| chr10 | 84576084 | 84576407 |
| chr10 | 84576407 | 84576687 |
| chr10 | 84576745 | 84577036 |
| chr10 | 84577036 | 84577337 |
| chr10 | 84577337 | 84577641 |
| chr10 | 84584394 | 84584821 |
| chr10 | 84584821 | 84585274 |
| chr10 | 84586977 | 84587145 |
| chr10 | 84598268 | 84598482 |
| chr10 | 84612425 | 84612614 |
| chr10 | 84621825 | 84622023 |
| chr10 | 84622108 | 84622440 |
| chr10 | 84622440 | 84622727 |
| chr10 | 84622727 | 84622944 |
| chr10 | 84629636 | 84629837 |
| chr10 | 84631273 | 84631514 |
| chr10 | 84645345 | 84645705 |

|       |          |          |
|-------|----------|----------|
| chr10 | 84646725 | 84646963 |
| chr10 | 84646963 | 84647229 |
| chr10 | 84647313 | 84647492 |
| chr10 | 84655208 | 84655438 |
| chr10 | 84655511 | 84655693 |
| chr10 | 84687796 | 84687961 |
| chr10 | 84701095 | 84701458 |
| chr10 | 84701458 | 84701691 |
| chr10 | 84704683 | 84705024 |
| chr10 | 84712802 | 84712964 |
| chr10 | 84713020 | 84713492 |
| chr10 | 84714023 | 84714173 |
| chr10 | 84726646 | 84727018 |
| chr10 | 84727018 | 84727451 |
| chr10 | 84732545 | 84732888 |
| chr10 | 84745768 | 84745923 |
| chr10 | 84754889 | 84755060 |
| chr10 | 84756812 | 84756996 |
| chr10 | 84756996 | 84757214 |
| chr10 | 84760176 | 84760348 |
| chr10 | 84768855 | 84769088 |
| chr10 | 84780886 | 84781038 |
| chr10 | 84816137 | 84816353 |
| chr10 | 84836186 | 84836458 |
| chr10 | 84838698 | 84838958 |
| chr10 | 84846762 | 84846912 |
| chr10 | 84869068 | 84869222 |
| chr10 | 84878894 | 84879053 |
| chr10 | 84879065 | 84879322 |
| chr10 | 84886151 | 84886441 |
| chr10 | 84886441 | 84886724 |
| chr10 | 84886724 | 84886952 |
| chr10 | 84886952 | 84887134 |
| chr10 | 84895928 | 84896088 |
| chr10 | 84902199 | 84902629 |
| chr10 | 84917017 | 84917422 |
| chr10 | 84917422 | 84917905 |
| chr10 | 84986096 | 84986350 |
| chr10 | 85010104 | 85010388 |
| chr10 | 85011179 | 85011559 |
| chr10 | 85013516 | 85013798 |
| chr10 | 85023483 | 85023843 |



|       |          |          |
|-------|----------|----------|
| chr10 | 85025903 | 85026139 |
| chr10 | 85029013 | 85029215 |
| chr10 | 85045421 | 85045627 |
| chr10 | 85050763 | 85050996 |
| chr10 | 85057274 | 85057899 |
| chr10 | 85102224 | 85102451 |
| chr10 | 85102451 | 85102675 |
| chr10 | 85102675 | 85102886 |
| chr10 | 85102886 | 85103150 |
| chr10 | 85103150 | 85103428 |
| chr10 | 85103428 | 85103646 |
| chr10 | 85103646 | 85103887 |
| chr10 | 85117979 | 85118230 |
| chr10 | 85127727 | 85128488 |
| chr10 | 85128545 | 85128725 |
| chr10 | 85134068 | 85134258 |
| chr10 | 85136697 | 85136897 |
| chr10 | 85154291 | 85154496 |
| chr10 | 85155684 | 85155847 |
| chr10 | 85161757 | 85162270 |
| chr10 | 85162994 | 85163182 |
| chr10 | 85167544 | 85167892 |
| chr10 | 85171270 | 85171609 |
| chr10 | 85174681 | 85174856 |
| chr10 | 85174856 | 85175117 |
| chr10 | 85183745 | 85184034 |
| chr10 | 85184251 | 85184514 |
| chr10 | 85184514 | 85184849 |
| chr10 | 85184849 | 85185221 |
| chr10 | 85185221 | 85185702 |
| chr10 | 85211558 | 85212050 |
| chr10 | 85220965 | 85221313 |
| chr10 | 85228466 | 85228633 |
| chr10 | 85231473 | 85231666 |
| chr10 | 85261472 | 85261627 |
| chr10 | 85295226 | 85295623 |
| chr10 | 85311688 | 85312389 |
| chr10 | 85318374 | 85318845 |
| chr10 | 85350781 | 85351093 |
| chr10 | 85351093 | 85351557 |
| chr10 | 85352865 | 85353024 |
| chr10 | 85355302 | 85355507 |

|       |          |          |
|-------|----------|----------|
| chr10 | 85366787 | 85367258 |
| chr10 | 85371362 | 85371847 |
| chr10 | 85371907 | 85372156 |
| chr10 | 85372156 | 85372487 |
| chr10 | 85372520 | 85372698 |
| chr10 | 85372727 | 85372906 |
| chr10 | 85377718 | 85377923 |
| chr10 | 85378781 | 85379305 |
| chr10 | 85386548 | 85386956 |
| chr10 | 85386956 | 85387225 |
| chr10 | 85387225 | 85387433 |
| chr10 | 85387433 | 85387670 |
| chr10 | 85387670 | 85388033 |
| chr10 | 85388033 | 85388346 |
| chr10 | 85388527 | 85388757 |
| chr10 | 85388802 | 85389068 |
| chr10 | 85390742 | 85390947 |
| chr10 | 85399283 | 85399688 |
| chr10 | 85399688 | 85399991 |
| chr10 | 85412941 | 85413156 |
| chr10 | 85415083 | 85415452 |
| chr10 | 85420839 | 85421506 |
| chr10 | 85422031 | 85422276 |
| chr10 | 85437337 | 85437499 |
| chr10 | 85445997 | 85446310 |
| chr10 | 85447978 | 85448142 |
| chr10 | 85456044 | 85456284 |
| chr10 | 85458940 | 85459363 |
| chr10 | 85471115 | 85471284 |
| chr10 | 85473371 | 85473674 |
| chr10 | 85473674 | 85473926 |
| chr10 | 85480416 | 85480648 |
| chr10 | 85480930 | 85481415 |
| chr10 | 85481415 | 85481644 |
| chr10 | 85486399 | 85487098 |
| chr10 | 85495194 | 85495485 |
| chr10 | 85502727 | 85502967 |
| chr10 | 85512778 | 85513221 |
| chr10 | 85519937 | 85520188 |
| chr10 | 85522332 | 85522591 |
| chr10 | 85526843 | 85527104 |
| chr10 | 85527329 | 85527685 |

|       |          |          |
|-------|----------|----------|
| chr10 | 85527685 | 85528132 |
| chr10 | 85534650 | 85535193 |
| chr10 | 85535380 | 85535934 |
| chr10 | 85545136 | 85545404 |
| chr10 | 85592076 | 85592349 |
| chr10 | 85597923 | 85598520 |
| chr10 | 85598520 | 85598923 |
| chr10 | 85601462 | 85601744 |
| chr10 | 85625003 | 85625180 |
| chr10 | 85627429 | 85627689 |
| chr10 | 85636164 | 85636514 |
| chr10 | 85639463 | 85640194 |
| chr10 | 85643479 | 85643797 |
| chr10 | 85648638 | 85649090 |
| chr10 | 85651121 | 85651655 |
| chr10 | 85651655 | 85652111 |
| chr10 | 85656470 | 85656774 |
| chr10 | 85660599 | 85660752 |
| chr10 | 85662153 | 85662312 |
| chr10 | 85676458 | 85676683 |
| chr10 | 85678114 | 85678280 |
| chr10 | 85678698 | 85679012 |
| chr10 | 85699798 | 85700083 |
| chr10 | 85725460 | 85725816 |
| chr10 | 85731622 | 85731777 |
| chr10 | 85731797 | 85732077 |
| chr10 | 85732077 | 85732316 |
| chr10 | 85739082 | 85739321 |
| chr10 | 85739321 | 85739602 |
| chr10 | 85739602 | 85739958 |
| chr10 | 85745632 | 85745926 |
| chr10 | 85745926 | 85746154 |
| chr10 | 85747190 | 85747400 |
| chr10 | 85748078 | 85748233 |
| chr10 | 85780911 | 85781061 |
| chr10 | 85786243 | 85786469 |
| chr10 | 85823269 | 85823464 |
| chr10 | 85829038 | 85829188 |
| chr10 | 85829361 | 85829539 |
| chr10 | 85829673 | 85829872 |
| chr10 | 85871471 | 85871703 |
| chr10 | 85871703 | 85871968 |

|       |          |          |
|-------|----------|----------|
| chr10 | 85871968 | 85872364 |
| chr10 | 85872364 | 85872808 |
| chr10 | 85897317 | 85897665 |
| chr10 | 85905790 | 85905940 |
| chr10 | 85916362 | 85916817 |
| chr10 | 85916817 | 85917366 |
| chr10 | 85927966 | 85928134 |
| chr10 | 85928188 | 85928688 |
| chr10 | 85928688 | 85928999 |
| chr10 | 85953299 | 85953948 |
| chr10 | 85957408 | 85957668 |
| chr10 | 85957668 | 85957979 |
| chr10 | 85967867 | 85968042 |
| chr10 | 85968083 | 85968367 |
| chr10 | 85972707 | 85973356 |
| chr10 | 85989786 | 85990048 |
| chr10 | 85990048 | 85990250 |
| chr10 | 85998068 | 85998302 |
| chr10 | 85999072 | 85999222 |
| chr10 | 86006524 | 86006949 |
| chr10 | 86021441 | 86021718 |
| chr10 | 86021718 | 86022018 |
| chr10 | 86022018 | 86022377 |
| chr10 | 86022377 | 86022670 |
| chr10 | 86029158 | 86029419 |
| chr10 | 86032232 | 86032471 |
| chr10 | 86064747 | 86065322 |
| chr10 | 86065914 | 86066106 |
| chr10 | 86074262 | 86074545 |
| chr10 | 86080008 | 86080162 |
| chr10 | 86092050 | 86092204 |
| chr10 | 86094328 | 86094478 |
| chr10 | 86096025 | 86096183 |
| chr10 | 86100182 | 86100626 |
| chr10 | 86100626 | 86101081 |
| chr10 | 86116309 | 86116679 |
| chr10 | 86139024 | 86139174 |
| chr10 | 86161553 | 86161983 |
| chr10 | 86161983 | 86162223 |
| chr10 | 86169193 | 86169349 |
| chr10 | 86171224 | 86171668 |
| chr10 | 86173245 | 86173784 |

|       |          |          |
|-------|----------|----------|
| chr10 | 86180654 | 86180814 |
| chr10 | 86182249 | 86182505 |
| chr10 | 86183196 | 86183487 |
| chr10 | 86192533 | 86192797 |
| chr10 | 86196214 | 86196364 |
| chr10 | 86196396 | 86197068 |
| chr10 | 86198677 | 86198982 |
| chr10 | 86233206 | 86233361 |
| chr10 | 86233405 | 86234013 |
| chr10 | 86242803 | 86243060 |
| chr10 | 86246892 | 86247098 |
| chr10 | 86247183 | 86247335 |
| chr10 | 86250640 | 86250818 |
| chr10 | 86264583 | 86264810 |
| chr10 | 86264810 | 86265132 |
| chr10 | 86265193 | 86265442 |
| chr10 | 86270301 | 86270802 |
| chr10 | 86286253 | 86286966 |
| chr10 | 86290305 | 86290502 |
| chr10 | 86296095 | 86296508 |
| chr10 | 86300253 | 86300437 |
| chr10 | 86300437 | 86300646 |
| chr10 | 86300654 | 86300925 |
| chr10 | 86302727 | 86303046 |
| chr10 | 86307298 | 86307549 |
| chr10 | 86310500 | 86310976 |
| chr10 | 86328210 | 86328385 |
| chr10 | 86330453 | 86330693 |
| chr10 | 86339136 | 86339290 |
| chr10 | 86339556 | 86339902 |
| chr10 | 86339902 | 86340157 |
| chr10 | 86340157 | 86340352 |
| chr10 | 86346350 | 86346504 |
| chr10 | 86351361 | 86351629 |
| chr10 | 86387970 | 86388386 |
| chr10 | 86406984 | 86407322 |
| chr10 | 86413187 | 86413409 |
| chr10 | 86452072 | 86452224 |
| chr10 | 86452296 | 86452893 |
| chr10 | 86459731 | 86460022 |
| chr10 | 86463713 | 86463891 |
| chr10 | 86463891 | 86464142 |

|       |          |          |
|-------|----------|----------|
| chr10 | 86473770 | 86473925 |
| chr10 | 86475276 | 86475660 |
| chr10 | 86483484 | 86483701 |
| chr10 | 86498095 | 86498416 |
| chr10 | 86498416 | 86498753 |
| chr10 | 86498753 | 86499070 |
| chr10 | 86499070 | 86499368 |
| chr10 | 86513922 | 86514122 |
| chr10 | 86524739 | 86525328 |
| chr10 | 86525328 | 86525732 |
| chr10 | 86528875 | 86529250 |
| chr10 | 86555920 | 86556159 |
| chr10 | 86591843 | 86592006 |
| chr10 | 86600928 | 86601202 |
| chr10 | 86612326 | 86612664 |
| chr10 | 86612664 | 86612970 |
| chr10 | 86616544 | 86616724 |
| chr10 | 86635728 | 86635886 |
| chr10 | 86636870 | 86637155 |
| chr10 | 86637155 | 86637482 |
| chr10 | 86668126 | 86668335 |
| chr10 | 86671513 | 86671843 |
| chr10 | 86672016 | 86672536 |
| chr10 | 86685136 | 86685418 |
| chr10 | 86685418 | 86685740 |
| chr10 | 86685740 | 86686258 |
| chr10 | 86693084 | 86693263 |
| chr10 | 86693263 | 86693457 |
| chr10 | 86705007 | 86705157 |
| chr10 | 86705197 | 86705886 |
| chr10 | 86705886 | 86706201 |
| chr10 | 86706201 | 86706437 |
| chr10 | 86711599 | 86711773 |
| chr10 | 86730827 | 86731013 |
| chr10 | 86731013 | 86731236 |
| chr10 | 86731236 | 86731496 |
| chr10 | 86772292 | 86772734 |
| chr10 | 86778254 | 86778813 |
| chr10 | 86778813 | 86779157 |
| chr10 | 86779157 | 86779372 |
| chr10 | 86779447 | 86779686 |
| chr10 | 86783644 | 86784016 |

|       |          |          |
|-------|----------|----------|
| chr10 | 86784305 | 86784679 |
| chr10 | 86789211 | 86789526 |
| chr10 | 86796261 | 86796526 |
| chr10 | 86825726 | 86826119 |
| chr10 | 86826119 | 86826386 |
| chr10 | 86839897 | 86840322 |
| chr10 | 86840322 | 86840604 |
| chr10 | 86844737 | 86844914 |
| chr10 | 86845299 | 86845558 |
| chr10 | 86845558 | 86845819 |
| chr10 | 86849240 | 86849523 |
| chr10 | 86849523 | 86849892 |
| chr10 | 86863499 | 86863730 |
| chr10 | 86880051 | 86880280 |
| chr10 | 86967321 | 86967638 |
| chr10 | 86972019 | 86972238 |
| chr10 | 86976104 | 86976278 |
| chr10 | 87024928 | 87025211 |
| chr10 | 87058379 | 87058553 |
| chr10 | 87370180 | 87370440 |
| chr10 | 87370440 | 87370796 |
| chr10 | 87395304 | 87395775 |
| chr10 | 87398192 | 87398396 |
| chr10 | 87398852 | 87399280 |
| chr10 | 87399280 | 87399517 |
| chr10 | 87486326 | 87486584 |
| chr10 | 87488826 | 87489109 |
| chr10 | 87492532 | 87492780 |
| chr10 | 87492780 | 87493061 |
| chr10 | 87493245 | 87493523 |
| chr10 | 87494766 | 87494992 |
| chr10 | 87503950 | 87504262 |
| chr10 | 87552747 | 87553004 |
| chr10 | 87590104 | 87590256 |
| chr10 | 87602262 | 87602527 |
| chr10 | 87639291 | 87639637 |
| chr10 | 87654662 | 87654968 |
| chr10 | 87678925 | 87679481 |
| chr10 | 87679601 | 87679848 |
| chr10 | 87679877 | 87680313 |
| chr10 | 87687840 | 87688228 |
| chr10 | 87711799 | 87712087 |

|       |          |          |
|-------|----------|----------|
| chr10 | 87712087 | 87712308 |
| chr10 | 87750363 | 87750641 |
| chr10 | 87792458 | 87792701 |
| chr10 | 87805676 | 87806226 |
| chr10 | 87816790 | 87817234 |
| chr10 | 87854487 | 87854735 |
| chr10 | 87856548 | 87856764 |
| chr10 | 87860115 | 87860363 |
| chr10 | 87860575 | 87860852 |
| chr10 | 87860866 | 87861051 |
| chr10 | 87865774 | 87866134 |
| chr10 | 87879853 | 87880536 |
| chr10 | 87885297 | 87885690 |
| chr10 | 87885690 | 87886120 |
| chr10 | 87889911 | 87890243 |
| chr10 | 87916622 | 87916794 |
| chr10 | 87927345 | 87927614 |
| chr10 | 88000016 | 88000284 |
| chr10 | 88008697 | 88009063 |
| chr10 | 88146662 | 88147151 |
| chr10 | 88147151 | 88147386 |
| chr10 | 88150431 | 88150753 |
| chr10 | 88178983 | 88179217 |
| chr10 | 88200754 | 88200904 |
| chr10 | 88200963 | 88201268 |
| chr10 | 88201268 | 88201722 |
| chr10 | 88264206 | 88264551 |
| chr10 | 88294325 | 88294513 |
| chr10 | 88304371 | 88304622 |
| chr10 | 88306309 | 88306501 |
| chr10 | 88327503 | 88327760 |
| chr10 | 88329476 | 88329663 |
| chr10 | 88345868 | 88346095 |
| chr10 | 88346325 | 88346832 |
| chr10 | 88346832 | 88347100 |
| chr10 | 88351855 | 88352084 |
| chr10 | 88353798 | 88354008 |
| chr10 | 88356318 | 88356471 |
| chr10 | 88356600 | 88356973 |
| chr10 | 88356973 | 88357621 |
| chr10 | 88376827 | 88376991 |
| chr10 | 88378949 | 88379314 |



|       |          |          |
|-------|----------|----------|
| chr10 | 88379314 | 88379552 |
| chr10 | 88379552 | 88379960 |
| chr10 | 88380127 | 88380374 |
| chr10 | 88380514 | 88380713 |
| chr10 | 88380779 | 88380968 |
| chr10 | 88389636 | 88389993 |
| chr10 | 88390394 | 88390625 |
| chr10 | 88403065 | 88403247 |
| chr10 | 88405600 | 88406118 |
| chr10 | 88408370 | 88408535 |
| chr10 | 88426501 | 88426742 |
| chr10 | 88428180 | 88428389 |
| chr10 | 88451280 | 88451507 |
| chr10 | 88452052 | 88452394 |
| chr10 | 88491668 | 88491925 |
| chr10 | 88503393 | 88504398 |
| chr10 | 88514555 | 88514835 |
| chr10 | 88642843 | 88643025 |
| chr10 | 88647863 | 88648032 |
| chr10 | 88649309 | 88649489 |
| chr10 | 88684331 | 88684561 |
| chr10 | 88708740 | 88709028 |
| chr10 | 88717426 | 88717914 |
| chr10 | 88719861 | 88720193 |
| chr10 | 88725418 | 88725682 |
| chr10 | 88728097 | 88728317 |
| chr10 | 88728317 | 88728587 |
| chr10 | 88730560 | 88730870 |
| chr10 | 88730870 | 88731176 |
| chr10 | 88731221 | 88731499 |
| chr10 | 88731499 | 88731715 |
| chr10 | 88731715 | 88731913 |
| chr10 | 88731913 | 88732117 |
| chr10 | 88732389 | 88732569 |
| chr10 | 88779817 | 88780091 |
| chr10 | 88780149 | 88780323 |
| chr10 | 88780795 | 88780945 |
| chr10 | 88783199 | 88783456 |
| chr10 | 88784479 | 88784639 |
| chr10 | 88826203 | 88826464 |
| chr10 | 88826464 | 88826701 |
| chr10 | 88826701 | 88826980 |

|       |          |          |
|-------|----------|----------|
| chr10 | 88850099 | 88850271 |
| chr10 | 88874939 | 88875246 |
| chr10 | 88875266 | 88875416 |
| chr10 | 88881206 | 88881419 |
| chr10 | 88885913 | 88886065 |
| chr10 | 89307544 | 89307890 |
| chr10 | 89308987 | 89309194 |
| chr10 | 89326986 | 89327351 |
| chr10 | 89344589 | 89344831 |
| chr10 | 89383556 | 89383794 |
| chr10 | 89398176 | 89398349 |
| chr10 | 89439465 | 89439716 |
| chr10 | 89442696 | 89443088 |
| chr10 | 89443088 | 89443517 |
| chr10 | 89443517 | 89443807 |
| chr10 | 89443807 | 89444216 |
| chr10 | 89445764 | 89445918 |
| chr10 | 89458441 | 89458782 |
| chr10 | 89458782 | 89459078 |
| chr10 | 89459078 | 89459346 |
| chr10 | 89461881 | 89462186 |
| chr10 | 89465057 | 89465453 |
| chr10 | 89486994 | 89487326 |
| chr10 | 89526918 | 89527518 |
| chr10 | 89531185 | 89531699 |
| chr10 | 89533247 | 89533513 |
| chr10 | 89533513 | 89533857 |
| chr10 | 89548134 | 89548356 |
| chr10 | 89589978 | 89590182 |
| chr10 | 89594384 | 89594658 |
| chr10 | 89599105 | 89599255 |
| chr10 | 89599267 | 89599890 |
| chr10 | 89619802 | 89619970 |
| chr10 | 89630171 | 89630410 |
| chr10 | 89635136 | 89635355 |
| chr10 | 89670339 | 89670726 |
| chr10 | 89677955 | 89678242 |
| chr10 | 89678242 | 89678464 |
| chr10 | 89679580 | 89679757 |
| chr10 | 89680561 | 89680837 |
| chr10 | 89685568 | 89685840 |
| chr10 | 89685840 | 89686182 |

|       |          |          |
|-------|----------|----------|
| chr10 | 89686182 | 89686467 |
| chr10 | 89686467 | 89686740 |
| chr10 | 89696389 | 89696549 |
| chr10 | 89702781 | 89703051 |
| chr10 | 89703112 | 89703402 |
| chr10 | 89707513 | 89707677 |
| chr10 | 89707781 | 89708001 |
| chr10 | 89708036 | 89708231 |
| chr10 | 89708797 | 89709282 |
| chr10 | 89731438 | 89731644 |
| chr10 | 89731982 | 89732214 |
| chr10 | 89732214 | 89732475 |
| chr10 | 89732475 | 89732844 |
| chr10 | 89743282 | 89743568 |
| chr10 | 89743570 | 89743820 |
| chr10 | 89744814 | 89745118 |
| chr10 | 89745118 | 89745410 |
| chr10 | 89745410 | 89745725 |
| chr10 | 89745725 | 89746018 |
| chr10 | 89746372 | 89746674 |
| chr10 | 89756773 | 89756933 |
| chr10 | 89757051 | 89757412 |
| chr10 | 89758467 | 89758633 |
| chr10 | 89758716 | 89758915 |
| chr10 | 89760980 | 89761191 |
| chr10 | 89764067 | 89764250 |
| chr10 | 89764250 | 89764444 |
| chr10 | 89764605 | 89764773 |
| chr10 | 89764799 | 89765056 |
| chr10 | 89768418 | 89768666 |
| chr10 | 89768666 | 89769124 |
| chr10 | 89769196 | 89769381 |
| chr10 | 89776012 | 89776345 |
| chr10 | 89819236 | 89819552 |
| chr10 | 89824000 | 89824390 |
| chr10 | 89824390 | 89824622 |
| chr10 | 89824622 | 89824675 |
| chr10 | 89824766 | 89825061 |
| chr10 | 89825061 | 89825388 |
| chr10 | 89825388 | 89825608 |
| chr10 | 89845435 | 89845753 |
| chr10 | 89845775 | 89845970 |

|       |          |          |
|-------|----------|----------|
| chr10 | 89872556 | 89872856 |
| chr10 | 89872866 | 89873166 |
| chr10 | 89873166 | 89873408 |
| chr10 | 89873408 | 89873890 |
| chr10 | 89942373 | 89942523 |
| chr10 | 89947127 | 89947743 |
| chr10 | 89975413 | 89975607 |
| chr10 | 89997678 | 89997848 |
| chr10 | 90024230 | 90024718 |
| chr10 | 90024763 | 90025299 |
| chr10 | 90025299 | 90025545 |
| chr10 | 90068419 | 90068988 |
| chr10 | 90068988 | 90069396 |
| chr10 | 90074257 | 90074652 |
| chr10 | 90074652 | 90075039 |
| chr10 | 90075039 | 90075291 |
| chr10 | 90081314 | 90081464 |
| chr10 | 90081724 | 90081905 |
| chr10 | 90112905 | 90113111 |
| chr10 | 90116756 | 90117105 |
| chr10 | 90130962 | 90131226 |
| chr10 | 90140030 | 90140274 |
| chr10 | 90140496 | 90140722 |
| chr10 | 90140862 | 90141311 |
| chr10 | 90144448 | 90144854 |
| chr10 | 90144854 | 90145171 |
| chr10 | 90148479 | 90148733 |
| chr10 | 90169931 | 90170256 |
| chr10 | 90193424 | 90193644 |
| chr10 | 90239140 | 90239467 |
| chr10 | 90266179 | 90266389 |
| chr10 | 90303785 | 90303950 |
| chr10 | 90304082 | 90304266 |
| chr10 | 90304973 | 90305170 |
| chr10 | 90364627 | 90364946 |
| chr10 | 90368875 | 90369025 |
| chr10 | 90369781 | 90370040 |
| chr10 | 90370696 | 90371088 |
| chr10 | 90373526 | 90373811 |
| chr10 | 90380223 | 90380389 |
| chr10 | 90380791 | 90380987 |
| chr10 | 90385544 | 90385750 |

|       |          |          |
|-------|----------|----------|
| chr10 | 90407508 | 90407894 |
| chr10 | 90507661 | 90507861 |
| chr10 | 90569127 | 90569449 |
| chr10 | 90595404 | 90595628 |
| chr10 | 90600250 | 90600522 |
| chr10 | 90606027 | 90606219 |
| chr10 | 90609313 | 90609605 |
| chr10 | 90690238 | 90690395 |
| chr10 | 90694929 | 90695137 |
| chr10 | 90728481 | 90728592 |
| chr10 | 90728592 | 90728640 |
| chr10 | 90728714 | 90729063 |
| chr10 | 90731891 | 90732094 |
| chr10 | 90732840 | 90733167 |
| chr10 | 90733695 | 90733971 |
| chr10 | 90753139 | 90753418 |
| chr10 | 90754417 | 90754666 |
| chr10 | 90757808 | 90758242 |
| chr10 | 90759592 | 90759838 |
| chr10 | 90771350 | 90771832 |
| chr10 | 90772356 | 90772506 |
| chr10 | 90809880 | 90810456 |
| chr10 | 90829055 | 90829353 |
| chr10 | 90829551 | 90829789 |
| chr10 | 90863907 | 90864127 |
| chr10 | 90864584 | 90864838 |
| chr10 | 90936493 | 90936644 |
| chr10 | 90964574 | 90964936 |
| chr10 | 90969326 | 90969556 |
| chr10 | 90969556 | 90969795 |
| chr10 | 90969875 | 90970166 |
| chr10 | 91029072 | 91029295 |
| chr10 | 91032427 | 91032708 |
| chr10 | 91033886 | 91034439 |
| chr10 | 91040957 | 91041206 |
| chr10 | 91049758 | 91050029 |
| chr10 | 91060815 | 91061174 |
| chr10 | 91071856 | 91072064 |
| chr10 | 91076826 | 91076985 |
| chr10 | 91082068 | 91082258 |
| chr10 | 91082258 | 91082538 |
| chr10 | 91082538 | 91082853 |

|       |          |          |
|-------|----------|----------|
| chr10 | 91082853 | 91083169 |
| chr10 | 91083172 | 91083374 |
| chr10 | 91083374 | 91083599 |
| chr10 | 91092296 | 91092622 |
| chr10 | 91092848 | 91093168 |
| chr10 | 91094288 | 91094570 |
| chr10 | 91110362 | 91110581 |
| chr10 | 91111068 | 91111287 |
| chr10 | 91112035 | 91112218 |
| chr10 | 91114012 | 91114240 |
| chr10 | 91116985 | 91117327 |
| chr10 | 91123247 | 91123466 |
| chr10 | 91123466 | 91123808 |
| chr10 | 91123808 | 91124343 |
| chr10 | 91131603 | 91131913 |
| chr10 | 91134781 | 91134988 |
| chr10 | 91138281 | 91138646 |
| chr10 | 91141628 | 91141897 |
| chr10 | 91142890 | 91143137 |
| chr10 | 91143970 | 91144126 |
| chr10 | 91156388 | 91156718 |
| chr10 | 91158408 | 91158985 |
| chr10 | 91166916 | 91167293 |
| chr10 | 91167293 | 91167684 |
| chr10 | 91170677 | 91171001 |
| chr10 | 91171001 | 91171418 |
| chr10 | 91171418 | 91172095 |
| chr10 | 91177203 | 91177545 |
| chr10 | 91180396 | 91180546 |
| chr10 | 91181388 | 91181967 |
| chr10 | 91181991 | 91182252 |
| chr10 | 91183230 | 91183890 |
| chr10 | 91187967 | 91188238 |
| chr10 | 91193991 | 91194689 |
| chr10 | 91199176 | 91199556 |
| chr10 | 91199556 | 91199888 |
| chr10 | 91200489 | 91200649 |
| chr10 | 91207240 | 91207646 |
| chr10 | 91207646 | 91207942 |
| chr10 | 91220628 | 91220872 |
| chr10 | 91230486 | 91230731 |
| chr10 | 91234499 | 91234752 |

|       |          |          |
|-------|----------|----------|
| chr10 | 91236870 | 91237227 |
| chr10 | 91240533 | 91240697 |
| chr10 | 91241079 | 91241580 |
| chr10 | 91241622 | 91241799 |
| chr10 | 91241799 | 91241981 |
| chr10 | 91242474 | 91242685 |
| chr10 | 91270241 | 91270644 |
| chr10 | 91271216 | 91271470 |
| chr10 | 91271470 | 91271695 |
| chr10 | 91297891 | 91298041 |
| chr10 | 91440191 | 91440492 |
| chr10 | 91704844 | 91705025 |
| chr10 | 91820587 | 91820756 |
| chr10 | 91825356 | 91825728 |
| chr10 | 91825800 | 91826024 |
| chr10 | 92068680 | 92068869 |
| chr10 | 92074065 | 92074297 |
| chr10 | 92094432 | 92094865 |
| chr10 | 92097567 | 92097958 |
| chr10 | 92098768 | 92098928 |
| chr10 | 92157194 | 92157670 |
| chr10 | 92158002 | 92158342 |
| chr10 | 92162347 | 92162835 |
| chr10 | 92335288 | 92335486 |
| chr10 | 92387971 | 92388197 |
| chr10 | 92388197 | 92388451 |
| chr10 | 92721655 | 92722264 |
| chr10 | 92722264 | 92722875 |
| chr10 | 92868423 | 92868642 |
| chr10 | 92928316 | 92928585 |
| chr10 | 92932658 | 92932964 |
| chr10 | 92933715 | 92933927 |
| chr10 | 92942976 | 92943142 |
| chr10 | 93049550 | 93049874 |
| chr10 | 93050973 | 93051425 |
| chr10 | 93052415 | 93052721 |
| chr10 | 93063077 | 93063286 |
| chr10 | 93069284 | 93069673 |
| chr10 | 93070502 | 93070858 |
| chr10 | 93081065 | 93081316 |
| chr10 | 93081316 | 93081540 |
| chr10 | 93081540 | 93081858 |

|       |          |          |
|-------|----------|----------|
| chr10 | 93083365 | 93083612 |
| chr10 | 93090715 | 93090956 |
| chr10 | 93094948 | 93095279 |
| chr10 | 93095279 | 93095770 |
| chr10 | 93098510 | 93098750 |
| chr10 | 93102578 | 93102728 |
| chr10 | 93114038 | 93114211 |
| chr10 | 93114869 | 93115061 |
| chr10 | 93126124 | 93126405 |
| chr10 | 93138288 | 93139198 |
| chr10 | 93144870 | 93145087 |
| chr10 | 93145117 | 93145494 |
| chr10 | 93156478 | 93156725 |
| chr10 | 93160265 | 93160502 |
| chr10 | 93160502 | 93160772 |
| chr10 | 93160772 | 93161014 |
| chr10 | 93161014 | 93161366 |
| chr10 | 93161366 | 93161796 |
| chr10 | 93165530 | 93165713 |
| chr10 | 93166492 | 93166725 |
| chr10 | 93168158 | 93168475 |
| chr10 | 93171245 | 93171442 |
| chr10 | 93175420 | 93175626 |
| chr10 | 93184660 | 93184933 |
| chr10 | 93188358 | 93189045 |
| chr10 | 93194810 | 93195112 |
| chr10 | 93195467 | 93195649 |
| chr10 | 93195939 | 93196183 |
| chr10 | 93207302 | 93207464 |
| chr10 | 93208218 | 93208509 |
| chr10 | 93212536 | 93212767 |
| chr10 | 93212767 | 93213094 |
| chr10 | 93213094 | 93213391 |
| chr10 | 93213391 | 93213734 |
| chr10 | 93214291 | 93214658 |
| chr10 | 93227987 | 93228241 |
| chr10 | 93233116 | 93233309 |
| chr10 | 93233309 | 93233528 |
| chr10 | 93234219 | 93234699 |
| chr10 | 93234796 | 93235203 |
| chr10 | 93242930 | 93243107 |
| chr10 | 93244334 | 93244484 |



|       |          |          |
|-------|----------|----------|
| chr10 | 93246481 | 93246871 |
| chr10 | 93246871 | 93247348 |
| chr10 | 93250817 | 93250967 |
| chr10 | 93259440 | 93259714 |
| chr10 | 93262197 | 93262484 |
| chr10 | 93267528 | 93267792 |
| chr10 | 93268444 | 93268656 |
| chr10 | 93271873 | 93272161 |
| chr10 | 93272161 | 93272447 |
| chr10 | 93272876 | 93273087 |
| chr10 | 93273087 | 93273357 |
| chr10 | 93273446 | 93273705 |
| chr10 | 93273709 | 93273980 |
| chr10 | 93275207 | 93275403 |
| chr10 | 93280712 | 93280894 |
| chr10 | 93287470 | 93288197 |
| chr10 | 93288197 | 93288689 |
| chr10 | 93291950 | 93292112 |
| chr10 | 93298243 | 93298641 |
| chr10 | 93298846 | 93299011 |
| chr10 | 93299420 | 93299583 |
| chr10 | 93305976 | 93306400 |
| chr10 | 93309001 | 93309563 |
| chr10 | 93309578 | 93309840 |
| chr10 | 93310156 | 93310394 |
| chr10 | 93310406 | 93310639 |
| chr10 | 93310882 | 93311318 |
| chr10 | 93316950 | 93317162 |
| chr10 | 93325913 | 93326455 |
| chr10 | 93326496 | 93326752 |
| chr10 | 93327366 | 93327569 |
| chr10 | 93331622 | 93331783 |
| chr10 | 93332167 | 93332415 |
| chr10 | 93332415 | 93332784 |
| chr10 | 93342935 | 93343392 |
| chr10 | 93343392 | 93344062 |
| chr10 | 93353564 | 93353877 |
| chr10 | 93354001 | 93354331 |
| chr10 | 93357211 | 93357584 |
| chr10 | 93357624 | 93357884 |
| chr10 | 93360304 | 93360534 |
| chr10 | 93360740 | 93361017 |

|       |          |          |
|-------|----------|----------|
| chr10 | 93361779 | 93362206 |
| chr10 | 93370007 | 93370335 |
| chr10 | 93370335 | 93370831 |
| chr10 | 93374956 | 93375177 |
| chr10 | 93394498 | 93395043 |
| chr10 | 93402738 | 93402941 |
| chr10 | 93402941 | 93403114 |
| chr10 | 93403265 | 93403796 |
| chr10 | 93407795 | 93408025 |
| chr10 | 93408269 | 93408451 |
| chr10 | 93409347 | 93409553 |
| chr10 | 93421966 | 93422441 |
| chr10 | 93422711 | 93422926 |
| chr10 | 93422926 | 93423361 |
| chr10 | 93423539 | 93423876 |
| chr10 | 93425608 | 93426030 |
| chr10 | 93429600 | 93429773 |
| chr10 | 93432392 | 93433119 |
| chr10 | 93433582 | 93433824 |
| chr10 | 93444543 | 93444917 |
| chr10 | 93452303 | 93452512 |
| chr10 | 93452898 | 93453197 |
| chr10 | 93453197 | 93453518 |
| chr10 | 93453518 | 93453942 |
| chr10 | 93471470 | 93471792 |
| chr10 | 93481135 | 93481288 |
| chr10 | 93485064 | 93485356 |
| chr10 | 93485356 | 93485629 |
| chr10 | 93486709 | 93486919 |
| chr10 | 93488200 | 93488685 |
| chr10 | 93488968 | 93489135 |
| chr10 | 93534366 | 93534679 |
| chr10 | 93539753 | 93540180 |
| chr10 | 93540212 | 93540655 |
| chr10 | 93542595 | 93542864 |
| chr10 | 93549044 | 93549336 |
| chr10 | 93549342 | 93549495 |
| chr10 | 93559398 | 93559560 |
| chr10 | 93559721 | 93559924 |
| chr10 | 93559947 | 93560180 |
| chr10 | 93577525 | 93577820 |
| chr10 | 93588920 | 93589090 |

|       |          |          |
|-------|----------|----------|
| chr10 | 93589221 | 93589576 |
| chr10 | 93589576 | 93589873 |
| chr10 | 93592597 | 93592899 |
| chr10 | 93594047 | 93594245 |
| chr10 | 93595773 | 93596255 |
| chr10 | 93597362 | 93597643 |
| chr10 | 93598926 | 93599171 |
| chr10 | 93599171 | 93599459 |
| chr10 | 93601150 | 93601308 |
| chr10 | 93610510 | 93610766 |
| chr10 | 93611471 | 93611696 |
| chr10 | 93611730 | 93611880 |
| chr10 | 93614292 | 93614478 |
| chr10 | 93617258 | 93617432 |
| chr10 | 93620309 | 93620847 |
| chr10 | 93620847 | 93621277 |
| chr10 | 93625826 | 93626029 |
| chr10 | 93638818 | 93639030 |
| chr10 | 93640737 | 93641097 |
| chr10 | 93641097 | 93641345 |
| chr10 | 93641345 | 93641628 |
| chr10 | 93641800 | 93642163 |
| chr10 | 93642163 | 93642411 |
| chr10 | 93642475 | 93642654 |
| chr10 | 93642880 | 93643170 |
| chr10 | 93647805 | 93648436 |
| chr10 | 93648582 | 93649066 |
| chr10 | 93653469 | 93653665 |
| chr10 | 93661072 | 93661287 |
| chr10 | 93661316 | 93661744 |
| chr10 | 93662069 | 93662264 |
| chr10 | 93666393 | 93666558 |
| chr10 | 93667100 | 93667301 |
| chr10 | 93677048 | 93677372 |
| chr10 | 93696045 | 93696310 |
| chr10 | 93696310 | 93696541 |
| chr10 | 93708596 | 93708774 |
| chr10 | 93726783 | 93727121 |
| chr10 | 93727123 | 93727410 |
| chr10 | 93727410 | 93727661 |
| chr10 | 93738270 | 93738553 |
| chr10 | 93741835 | 93742103 |

|       |          |          |
|-------|----------|----------|
| chr10 | 93742103 | 93742384 |
| chr10 | 93742662 | 93742819 |
| chr10 | 93749183 | 93749570 |
| chr10 | 93749570 | 93750022 |
| chr10 | 93757283 | 93757817 |
| chr10 | 93757817 | 93758397 |
| chr10 | 93759798 | 93759948 |
| chr10 | 93763142 | 93763392 |
| chr10 | 93777479 | 93777629 |
| chr10 | 93783176 | 93783927 |
| chr10 | 93803198 | 93803608 |
| chr10 | 93812904 | 93813075 |
| chr10 | 93813097 | 93813339 |
| chr10 | 93813357 | 93813656 |
| chr10 | 93818670 | 93818962 |
| chr10 | 93818962 | 93819222 |
| chr10 | 93833485 | 93833999 |
| chr10 | 93833999 | 93834435 |
| chr10 | 93852131 | 93852268 |
| chr10 | 93852268 | 93852439 |
| chr10 | 93882835 | 93882995 |
| chr10 | 93888996 | 93889332 |
| chr10 | 93889332 | 93889667 |
| chr10 | 93889667 | 93889963 |
| chr10 | 93889963 | 93890255 |
| chr10 | 93899145 | 93899711 |
| chr10 | 93899711 | 93900035 |
| chr10 | 93918845 | 93918995 |
| chr10 | 93932876 | 93933302 |
| chr10 | 93934003 | 93934401 |
| chr10 | 93938169 | 93938435 |
| chr10 | 93944002 | 93944810 |
| chr10 | 93945883 | 93946309 |
| chr10 | 93995189 | 93995391 |
| chr10 | 94010090 | 94010248 |
| chr10 | 94013272 | 94013496 |
| chr10 | 94035074 | 94035235 |
| chr10 | 94035242 | 94035576 |
| chr10 | 94035644 | 94035989 |
| chr10 | 94035989 | 94036200 |
| chr10 | 94036200 | 94036410 |
| chr10 | 94036410 | 94036619 |

|       |          |          |
|-------|----------|----------|
| chr10 | 94039889 | 94040229 |
| chr10 | 94047791 | 94048210 |
| chr10 | 94048210 | 94048518 |
| chr10 | 94048818 | 94048968 |
| chr10 | 94049144 | 94049555 |
| chr10 | 94056904 | 94057148 |
| chr10 | 94059355 | 94059998 |
| chr10 | 94059998 | 94060445 |
| chr10 | 94064646 | 94064858 |
| chr10 | 94065453 | 94065767 |
| chr10 | 94065767 | 94066239 |
| chr10 | 94066814 | 94067251 |
| chr10 | 94072149 | 94072435 |
| chr10 | 94072435 | 94072951 |
| chr10 | 94072951 | 94073478 |
| chr10 | 94081970 | 94082373 |
| chr10 | 94082373 | 94082668 |
| chr10 | 94087341 | 94087704 |
| chr10 | 94087755 | 94087960 |
| chr10 | 94089049 | 94089250 |
| chr10 | 94110196 | 94110499 |
| chr10 | 94116314 | 94116642 |
| chr10 | 94116803 | 94117309 |
| chr10 | 94117942 | 94118294 |
| chr10 | 94125275 | 94125507 |
| chr10 | 94128201 | 94128614 |
| chr10 | 94129647 | 94129885 |
| chr10 | 94129885 | 94130171 |
| chr10 | 94147429 | 94147711 |
| chr10 | 94147711 | 94148095 |
| chr10 | 94148095 | 94148586 |
| chr10 | 94148924 | 94149108 |
| chr10 | 94151504 | 94151916 |
| chr10 | 94160344 | 94160494 |
| chr10 | 94174683 | 94175083 |
| chr10 | 94187514 | 94187822 |
| chr10 | 94198588 | 94198864 |
| chr10 | 94198864 | 94199169 |
| chr10 | 94199169 | 94199472 |
| chr10 | 94209744 | 94210069 |
| chr10 | 94225125 | 94225386 |
| chr10 | 94225438 | 94225672 |

|       |          |          |
|-------|----------|----------|
| chr10 | 94242880 | 94243144 |
| chr10 | 94279594 | 94279951 |
| chr10 | 94280648 | 94281031 |
| chr10 | 94283369 | 94283674 |
| chr10 | 94283674 | 94283931 |
| chr10 | 94311848 | 94312388 |
| chr10 | 94333394 | 94333634 |
| chr10 | 94334063 | 94334230 |
| chr10 | 94337853 | 94338136 |
| chr10 | 94344565 | 94344928 |
| chr10 | 94352215 | 94352477 |
| chr10 | 94378331 | 94378644 |
| chr10 | 94380646 | 94380976 |
| chr10 | 94381048 | 94381545 |
| chr10 | 94381791 | 94381941 |
| chr10 | 94391690 | 94392071 |
| chr10 | 94398201 | 94398473 |
| chr10 | 94408714 | 94409202 |
| chr10 | 94431970 | 94432230 |
| chr10 | 94443477 | 94443801 |
| chr10 | 94456971 | 94457192 |
| chr10 | 94462804 | 94462996 |
| chr10 | 94466969 | 94467223 |
| chr10 | 94473609 | 94473842 |
| chr10 | 94473944 | 94474271 |
| chr10 | 94480747 | 94481226 |
| chr10 | 94489442 | 94489741 |
| chr10 | 94512826 | 94513215 |
| chr10 | 94514093 | 94514339 |
| chr10 | 94514339 | 94514593 |
| chr10 | 94514597 | 94515092 |
| chr10 | 94515092 | 94515593 |
| chr10 | 94519982 | 94520233 |
| chr10 | 94522984 | 94523173 |
| chr10 | 94523428 | 94523649 |
| chr10 | 94523770 | 94524139 |
| chr10 | 94524920 | 94525371 |
| chr10 | 94533200 | 94533371 |
| chr10 | 94533453 | 94533667 |
| chr10 | 94545311 | 94545631 |
| chr10 | 94545631 | 94546278 |
| chr10 | 94550756 | 94551042 |

|       |          |          |
|-------|----------|----------|
| chr10 | 94551417 | 94551615 |
| chr10 | 94554132 | 94554468 |
| chr10 | 94555408 | 94555899 |
| chr10 | 94556110 | 94556439 |
| chr10 | 94558000 | 94558150 |
| chr10 | 94561305 | 94561724 |
| chr10 | 94561735 | 94561911 |
| chr10 | 94562274 | 94562501 |
| chr10 | 94567889 | 94568487 |
| chr10 | 94570759 | 94571056 |
| chr10 | 94572023 | 94572231 |
| chr10 | 94574862 | 94575019 |
| chr10 | 94575580 | 94575745 |
| chr10 | 94575944 | 94576297 |
| chr10 | 94585827 | 94586143 |
| chr10 | 94592366 | 94592610 |
| chr10 | 94597411 | 94597850 |
| chr10 | 94598512 | 94598707 |
| chr10 | 94602981 | 94603196 |
| chr10 | 94609180 | 94609768 |
| chr10 | 94623627 | 94623934 |
| chr10 | 94674077 | 94674523 |
| chr10 | 94674558 | 94674708 |
| chr10 | 94687904 | 94688054 |
| chr10 | 94688141 | 94688505 |
| chr10 | 94688505 | 94688824 |
| chr10 | 94688824 | 94689154 |
| chr10 | 94689154 | 94689452 |
| chr10 | 94695047 | 94695198 |
| chr10 | 94706776 | 94707012 |
| chr10 | 94716318 | 94716671 |
| chr10 | 94732164 | 94732385 |
| chr10 | 94732385 | 94732620 |
| chr10 | 94771370 | 94771892 |
| chr10 | 94789192 | 94789639 |
| chr10 | 94818417 | 94818722 |
| chr10 | 94824980 | 94825140 |
| chr10 | 94839750 | 94839919 |
| chr10 | 94872077 | 94872290 |
| chr10 | 94939002 | 94939152 |
| chr10 | 94943513 | 94943891 |
| chr10 | 94943891 | 94944110 |

|       |          |          |
|-------|----------|----------|
| chr10 | 94944110 | 94944533 |
| chr10 | 94944602 | 94944958 |
| chr10 | 94948929 | 94949085 |
| chr10 | 94958390 | 94958628 |
| chr10 | 94990951 | 94991301 |
| chr10 | 94991337 | 94991489 |
| chr10 | 94991534 | 94991769 |
| chr10 | 94991769 | 94992016 |
| chr10 | 94992198 | 94992486 |
| chr10 | 95008979 | 95009284 |
| chr10 | 95048532 | 95048811 |
| chr10 | 95048827 | 95049108 |
| chr10 | 95049568 | 95049789 |
| chr10 | 95086884 | 95087199 |
| chr10 | 95088216 | 95088446 |
| chr10 | 95119439 | 95119596 |
| chr10 | 95122805 | 95123008 |
| chr10 | 95124586 | 95124809 |
| chr10 | 95133050 | 95133250 |
| chr10 | 95147247 | 95147402 |
| chr10 | 95191983 | 95192216 |
| chr10 | 95213055 | 95213346 |
| chr10 | 95213346 | 95213681 |
| chr10 | 95232550 | 95232869 |
| chr10 | 95248298 | 95248685 |
| chr10 | 95264834 | 95265000 |
| chr10 | 95278118 | 95278545 |
| chr10 | 95281774 | 95282030 |
| chr10 | 95300245 | 95300395 |
| chr10 | 95300479 | 95300749 |
| chr10 | 95323397 | 95323785 |
| chr10 | 95323785 | 95324042 |
| chr10 | 95324042 | 95324296 |
| chr10 | 95347785 | 95348264 |
| chr10 | 95351444 | 95351808 |
| chr10 | 95369254 | 95369574 |
| chr10 | 95371753 | 95372364 |
| chr10 | 95372409 | 95372567 |
| chr10 | 95378075 | 95378319 |
| chr10 | 95385698 | 95386361 |
| chr10 | 95388624 | 95388827 |
| chr10 | 95388827 | 95389107 |



|       |          |          |
|-------|----------|----------|
| chr10 | 95389107 | 95389566 |
| chr10 | 95414705 | 95415096 |
| chr10 | 95415343 | 95415596 |
| chr10 | 95415596 | 95415856 |
| chr10 | 95415897 | 95416152 |
| chr10 | 95416441 | 95416940 |
| chr10 | 95416940 | 95417213 |
| chr10 | 95417213 | 95417464 |
| chr10 | 95417464 | 95417642 |
| chr10 | 95417961 | 95418141 |
| chr10 | 95422794 | 95422988 |
| chr10 | 95433646 | 95434028 |
| chr10 | 95438664 | 95438826 |
| chr10 | 95439356 | 95440072 |
| chr10 | 95440084 | 95440301 |
| chr10 | 95440699 | 95440882 |
| chr10 | 95457709 | 95458032 |
| chr10 | 95458058 | 95458359 |
| chr10 | 95458435 | 95458779 |
| chr10 | 95458779 | 95459080 |
| chr10 | 95465436 | 95465982 |
| chr10 | 95466006 | 95466245 |
| chr10 | 95471211 | 95471675 |
| chr10 | 95476010 | 95476304 |
| chr10 | 95489749 | 95489949 |
| chr10 | 95501168 | 95501346 |
| chr10 | 95501423 | 95501620 |
| chr10 | 95501620 | 95501831 |
| chr10 | 95501831 | 95502136 |
| chr10 | 95508047 | 95508467 |
| chr10 | 95508708 | 95509005 |
| chr10 | 95514605 | 95515257 |
| chr10 | 95515257 | 95515623 |
| chr10 | 95515623 | 95515878 |
| chr10 | 95524174 | 95524403 |
| chr10 | 95524403 | 95524714 |
| chr10 | 95524873 | 95525166 |
| chr10 | 95525166 | 95525737 |
| chr10 | 95532999 | 95533252 |
| chr10 | 95538157 | 95538330 |
| chr10 | 95539282 | 95539596 |
| chr10 | 95544080 | 95544324 |

|       |          |          |
|-------|----------|----------|
| chr10 | 95545003 | 95545378 |
| chr10 | 95551831 | 95552076 |
| chr10 | 95556491 | 95556798 |
| chr10 | 95557355 | 95557607 |
| chr10 | 95557637 | 95557831 |
| chr10 | 95562537 | 95562693 |
| chr10 | 95563245 | 95563463 |
| chr10 | 95563482 | 95563865 |
| chr10 | 95563865 | 95564170 |
| chr10 | 95564170 | 95564406 |
| chr10 | 95564406 | 95564606 |
| chr10 | 95589244 | 95589421 |
| chr10 | 95613850 | 95614015 |
| chr10 | 95627445 | 95627696 |
| chr10 | 95630672 | 95631023 |
| chr10 | 95631023 | 95631374 |
| chr10 | 95631527 | 95631859 |
| chr10 | 95631859 | 95632171 |
| chr10 | 95639454 | 95639998 |
| chr10 | 95643806 | 95643962 |
| chr10 | 95644001 | 95644435 |
| chr10 | 95656826 | 95657094 |
| chr10 | 95661954 | 95662105 |
| chr10 | 95682940 | 95683413 |
| chr10 | 95683840 | 95684061 |
| chr10 | 95685263 | 95685434 |
| chr10 | 95686183 | 95686333 |
| chr10 | 95687868 | 95688070 |
| chr10 | 95689885 | 95690145 |
| chr10 | 95700433 | 95700846 |
| chr10 | 95702857 | 95703255 |
| chr10 | 95703848 | 95704051 |
| chr10 | 95704868 | 95705236 |
| chr10 | 95708141 | 95708452 |
| chr10 | 95709449 | 95709692 |
| chr10 | 95712122 | 95712560 |
| chr10 | 95720405 | 95720751 |
| chr10 | 95747444 | 95747781 |
| chr10 | 95762477 | 95763100 |
| chr10 | 95763828 | 95764057 |
| chr10 | 95767614 | 95768304 |
| chr10 | 95768334 | 95768524 |

|       |          |          |
|-------|----------|----------|
| chr10 | 95768948 | 95769260 |
| chr10 | 95772810 | 95773170 |
| chr10 | 95779383 | 95779872 |
| chr10 | 95779872 | 95780162 |
| chr10 | 95782227 | 95782381 |
| chr10 | 95846308 | 95846643 |
| chr10 | 95846643 | 95846886 |
| chr10 | 95862630 | 95863134 |
| chr10 | 95864753 | 95865102 |
| chr10 | 95883907 | 95884534 |
| chr10 | 95885320 | 95885537 |
| chr10 | 95886146 | 95886367 |
| chr10 | 95893593 | 95893805 |
| chr10 | 95894414 | 95894722 |
| chr10 | 95894803 | 95895060 |
| chr10 | 95898530 | 95898810 |
| chr10 | 95899350 | 95899571 |
| chr10 | 95904371 | 95904605 |
| chr10 | 95904767 | 95904963 |
| chr10 | 95911111 | 95911393 |
| chr10 | 95918174 | 95918345 |
| chr10 | 95918345 | 95918530 |
| chr10 | 95918671 | 95919184 |
| chr10 | 95923632 | 95923898 |
| chr10 | 95923898 | 95924231 |
| chr10 | 95925021 | 95925239 |
| chr10 | 95940237 | 95940852 |
| chr10 | 95940852 | 95941474 |
| chr10 | 95941797 | 95941969 |
| chr10 | 95945211 | 95945361 |
| chr10 | 95953798 | 95954099 |
| chr10 | 95954099 | 95954323 |
| chr10 | 95969829 | 95969979 |
| chr10 | 96015567 | 96016122 |
| chr10 | 96016122 | 96016544 |
| chr10 | 96033478 | 96033628 |
| chr10 | 96033698 | 96033982 |
| chr10 | 96048737 | 96048952 |
| chr10 | 96077546 | 96077914 |
| chr10 | 96080584 | 96080760 |
| chr10 | 96083049 | 96083199 |
| chr10 | 96096603 | 96097214 |

|       |          |          |
|-------|----------|----------|
| chr10 | 96105256 | 96105458 |
| chr10 | 96120862 | 96121062 |
| chr10 | 96121078 | 96121621 |
| chr10 | 96121621 | 96121939 |
| chr10 | 96125841 | 96126088 |
| chr10 | 96126986 | 96127198 |
| chr10 | 96132254 | 96132483 |
| chr10 | 96160882 | 96161108 |
| chr10 | 96161108 | 96161505 |
| chr10 | 96181303 | 96181800 |
| chr10 | 96181800 | 96182131 |
| chr10 | 96188091 | 96188532 |
| chr10 | 96211279 | 96211456 |
| chr10 | 96213892 | 96214334 |
| chr10 | 96214334 | 96214641 |
| chr10 | 96220783 | 96221060 |
| chr10 | 96221145 | 96221374 |
| chr10 | 96227523 | 96227883 |
| chr10 | 96231133 | 96231288 |
| chr10 | 96231365 | 96231763 |
| chr10 | 96236112 | 96236357 |
| chr10 | 96237060 | 96237349 |
| chr10 | 96237650 | 96238080 |
| chr10 | 96238287 | 96238619 |
| chr10 | 96238876 | 96239248 |
| chr10 | 96259264 | 96259590 |
| chr10 | 96293297 | 96293492 |
| chr10 | 96294833 | 96295007 |
| chr10 | 96309298 | 96309660 |
| chr10 | 96309694 | 96310281 |
| chr10 | 96325351 | 96325793 |
| chr10 | 96328892 | 96329070 |
| chr10 | 96337827 | 96338525 |
| chr10 | 96338626 | 96338967 |
| chr10 | 96404755 | 96404997 |
| chr10 | 96458964 | 96459140 |
| chr10 | 96459144 | 96459588 |
| chr10 | 96460633 | 96460891 |
| chr10 | 96463876 | 96464071 |
| chr10 | 96550331 | 96550606 |
| chr10 | 96557220 | 96557708 |
| chr10 | 96557975 | 96558182 |

|       |          |          |
|-------|----------|----------|
| chr10 | 96589792 | 96590233 |
| chr10 | 96605239 | 96605450 |
| chr10 | 96616395 | 96616712 |
| chr10 | 96616712 | 96617202 |
| chr10 | 96617230 | 96617414 |
| chr10 | 96617692 | 96617849 |
| chr10 | 96618251 | 96618623 |
| chr10 | 96621120 | 96621285 |
| chr10 | 96621573 | 96621885 |
| chr10 | 96623305 | 96623501 |
| chr10 | 96628158 | 96628665 |
| chr10 | 96628665 | 96629044 |
| chr10 | 96629281 | 96629697 |
| chr10 | 96632806 | 96633178 |
| chr10 | 96635380 | 96635815 |
| chr10 | 96651645 | 96651833 |
| chr10 | 96651833 | 96652023 |
| chr10 | 96660509 | 96660683 |
| chr10 | 96686282 | 96686485 |
| chr10 | 96686958 | 96687145 |
| chr10 | 96690313 | 96690623 |
| chr10 | 96690860 | 96691352 |
| chr10 | 96691400 | 96691637 |
| chr10 | 96697513 | 96697789 |
| chr10 | 96697789 | 96698336 |
| chr10 | 96703097 | 96703257 |
| chr10 | 96708456 | 96708949 |
| chr10 | 96709043 | 96709226 |
| chr10 | 96716418 | 96716794 |
| chr10 | 96716794 | 96717078 |
| chr10 | 96722555 | 96722803 |
| chr10 | 96726148 | 96726638 |
| chr10 | 96727189 | 96727537 |
| chr10 | 96727540 | 96727795 |
| chr10 | 96750779 | 96751239 |
| chr10 | 96751578 | 96751876 |
| chr10 | 96756407 | 96756604 |
| chr10 | 96756604 | 96756791 |
| chr10 | 96756856 | 96757006 |
| chr10 | 96757386 | 96757664 |
| chr10 | 96792608 | 96792911 |
| chr10 | 96793013 | 96793163 |

|       |          |          |
|-------|----------|----------|
| chr10 | 96794957 | 96795203 |
| chr10 | 96806471 | 96807097 |
| chr10 | 96826348 | 96826514 |
| chr10 | 96828897 | 96829234 |
| chr10 | 96862605 | 96862827 |
| chr10 | 96871322 | 96871516 |
| chr10 | 96871525 | 96871831 |
| chr10 | 96871831 | 96872217 |
| chr10 | 96874519 | 96874728 |
| chr10 | 96875663 | 96876013 |
| chr10 | 96919607 | 96919912 |
| chr10 | 96934758 | 96934951 |
| chr10 | 96947634 | 96947965 |
| chr10 | 96947965 | 96948372 |
| chr10 | 97093745 | 97094338 |
| chr10 | 97160389 | 97160554 |
| chr10 | 97241519 | 97241815 |
| chr10 | 97247213 | 97247485 |
| chr10 | 97308041 | 97308201 |
| chr10 | 97308306 | 97308736 |
| chr10 | 97312982 | 97313317 |
| chr10 | 97313427 | 97313682 |
| chr10 | 97313682 | 97313975 |
| chr10 | 97337974 | 97338343 |
| chr10 | 97338343 | 97338730 |
| chr10 | 97345429 | 97345649 |
| chr10 | 97363984 | 97364145 |
| chr10 | 97436571 | 97437122 |
| chr10 | 97442161 | 97442311 |
| chr10 | 97442347 | 97442767 |
| chr10 | 97446170 | 97446332 |
| chr10 | 97446572 | 97446816 |
| chr10 | 97446816 | 97447074 |
| chr10 | 97516506 | 97516766 |
| chr10 | 97525696 | 97525913 |
| chr10 | 97533694 | 97533908 |
| chr10 | 97625218 | 97625473 |
| chr10 | 97650493 | 97650694 |
| chr10 | 97697089 | 97697425 |
| chr10 | 97704716 | 97704866 |
| chr10 | 97712624 | 97712938 |
| chr10 | 97793624 | 97794154 |

|       |          |          |
|-------|----------|----------|
| chr10 | 97794154 | 97794373 |
| chr10 | 97794373 | 97794557 |
| chr10 | 97796069 | 97796257 |
| chr10 | 97866081 | 97866372 |
| chr10 | 97866404 | 97866733 |
| chr10 | 97866733 | 97866998 |
| chr10 | 97964251 | 97964490 |
| chr10 | 98008420 | 98008735 |
| chr10 | 98075203 | 98075373 |
| chr10 | 98075373 | 98075545 |
| chr10 | 98235271 | 98235476 |
| chr10 | 98235574 | 98235823 |
| chr10 | 98248409 | 98248602 |
| chr10 | 98292121 | 98292358 |
| chr10 | 98292358 | 98292566 |
| chr10 | 98318433 | 98318782 |
| chr10 | 98324557 | 98324988 |
| chr10 | 98332609 | 98333079 |
| chr10 | 98333316 | 98333948 |
| chr10 | 98346055 | 98346231 |
| chr10 | 98370468 | 98370941 |
| chr10 | 98371120 | 98371299 |
| chr10 | 98373958 | 98374230 |
| chr10 | 98374794 | 98374961 |
| chr10 | 98374961 | 98375133 |
| chr10 | 98494446 | 98494673 |
| chr10 | 98495950 | 98496251 |
| chr10 | 98496255 | 98496646 |
| chr10 | 98497111 | 98497329 |
| chr10 | 98508397 | 98509054 |
| chr10 | 98536595 | 98537010 |
| chr10 | 98537130 | 98537303 |
| chr10 | 98554506 | 98554688 |
| chr10 | 98561942 | 98562541 |
| chr10 | 98564560 | 98564829 |
| chr10 | 98581894 | 98582124 |
| chr10 | 98629307 | 98629566 |
| chr10 | 98667658 | 98668051 |
| chr10 | 98668051 | 98668318 |
| chr10 | 98674212 | 98674472 |
| chr10 | 98684113 | 98684648 |
| chr10 | 98694988 | 98695336 |

|       |          |          |
|-------|----------|----------|
| chr10 | 98700410 | 98700662 |
| chr10 | 98700662 | 98700897 |
| chr10 | 98702418 | 98702862 |
| chr10 | 98704588 | 98704968 |
| chr10 | 98739040 | 98739339 |
| chr10 | 98743944 | 98744235 |
| chr10 | 98744235 | 98744660 |
| chr10 | 98744800 | 98744971 |
| chr10 | 98745534 | 98745728 |
| chr10 | 98745916 | 98746282 |
| chr10 | 98785506 | 98785692 |
| chr10 | 98828575 | 98828860 |
| chr10 | 98829060 | 98829690 |
| chr10 | 98848088 | 98848522 |
| chr10 | 98861624 | 98861829 |
| chr10 | 98864475 | 98864724 |
| chr10 | 98864724 | 98864985 |
| chr10 | 98864985 | 98865305 |
| chr10 | 98877915 | 98878162 |
| chr10 | 98880080 | 98880428 |
| chr10 | 98884975 | 98885224 |
| chr10 | 98913843 | 98914143 |
| chr10 | 98914143 | 98914358 |
| chr10 | 98914358 | 98914770 |
| chr10 | 98914770 | 98915287 |
| chr10 | 98915456 | 98915664 |
| chr10 | 98919436 | 98919599 |
| chr10 | 98923241 | 98923520 |
| chr10 | 98924717 | 98925030 |
| chr10 | 98943536 | 98943963 |
| chr10 | 98943963 | 98944430 |
| chr10 | 98950487 | 98950717 |
| chr10 | 98950717 | 98950956 |
| chr10 | 98951344 | 98951689 |
| chr10 | 98951689 | 98952149 |
| chr10 | 98954224 | 98954658 |
| chr10 | 98963322 | 98963604 |
| chr10 | 98966751 | 98966970 |
| chr10 | 98973875 | 98974277 |
| chr10 | 98974624 | 98974948 |
| chr10 | 98974948 | 98975219 |
| chr10 | 98983918 | 98984140 |



|       |          |          |
|-------|----------|----------|
| chr10 | 98992055 | 98992286 |
| chr10 | 99004690 | 99005310 |
| chr10 | 99008724 | 99008950 |
| chr10 | 99011116 | 99011287 |
| chr10 | 99013309 | 99013534 |
| chr10 | 99047193 | 99047506 |
| chr10 | 99047630 | 99047835 |
| chr10 | 99050175 | 99050483 |
| chr10 | 99062283 | 99062671 |
| chr10 | 99062671 | 99063275 |
| chr10 | 99078731 | 99078905 |
| chr10 | 99081006 | 99081158 |
| chr10 | 99081538 | 99082248 |
| chr10 | 99084971 | 99085230 |
| chr10 | 99097475 | 99097625 |
| chr10 | 99106681 | 99106959 |
| chr10 | 99106959 | 99107301 |
| chr10 | 99107301 | 99107796 |
| chr10 | 99107916 | 99108229 |
| chr10 | 99108229 | 99108608 |
| chr10 | 99123894 | 99124096 |
| chr10 | 99124096 | 99124371 |
| chr10 | 99124371 | 99124732 |
| chr10 | 99137676 | 99137857 |
| chr10 | 99152164 | 99152325 |
| chr10 | 99156904 | 99157114 |
| chr10 | 99162086 | 99162275 |
| chr10 | 99164990 | 99165398 |
| chr10 | 99166483 | 99166680 |
| chr10 | 99168924 | 99169090 |
| chr10 | 99172036 | 99172528 |
| chr10 | 99173190 | 99173462 |
| chr10 | 99176170 | 99176697 |
| chr10 | 99190824 | 99191142 |
| chr10 | 99193708 | 99193924 |
| chr10 | 99194747 | 99195091 |
| chr10 | 99201830 | 99202260 |
| chr10 | 99202380 | 99202807 |
| chr10 | 99204003 | 99204203 |
| chr10 | 99204353 | 99204510 |
| chr10 | 99204610 | 99204874 |
| chr10 | 99211139 | 99211289 |

|       |          |          |
|-------|----------|----------|
| chr10 | 99211398 | 99211847 |
| chr10 | 99211847 | 99212137 |
| chr10 | 99212137 | 99212399 |
| chr10 | 99219989 | 99220198 |
| chr10 | 99226923 | 99227207 |
| chr10 | 99237196 | 99237719 |
| chr10 | 99241869 | 99242416 |
| chr10 | 99242416 | 99242797 |
| chr10 | 99243889 | 99244178 |
| chr10 | 99244178 | 99244445 |
| chr10 | 99250826 | 99251009 |
| chr10 | 99255821 | 99256158 |
| chr10 | 99261433 | 99261707 |
| chr10 | 99261707 | 99262020 |
| chr10 | 99262020 | 99262401 |
| chr10 | 99262902 | 99263404 |
| chr10 | 99263404 | 99263781 |
| chr10 | 99268766 | 99269170 |
| chr10 | 99269174 | 99269762 |
| chr10 | 99270275 | 99270516 |
| chr10 | 99270612 | 99270839 |
| chr10 | 99287834 | 99288090 |
| chr10 | 99293022 | 99293438 |
| chr10 | 99297144 | 99297434 |
| chr10 | 99297564 | 99298114 |
| chr10 | 99308808 | 99309345 |
| chr10 | 99376278 | 99376722 |
| chr10 | 99379171 | 99379443 |
| chr10 | 99396374 | 99396876 |
| chr10 | 99396876 | 99397224 |
| chr10 | 99405518 | 99405723 |
| chr10 | 99423383 | 99423736 |
| chr10 | 99460131 | 99460323 |
| chr10 | 99511934 | 99512117 |
| chr10 | 99555894 | 99556628 |
| chr10 | 99576287 | 99576835 |
| chr10 | 99577335 | 99577600 |
| chr10 | 99592247 | 99592411 |
| chr10 | 99599481 | 99599872 |
| chr10 | 99610982 | 99611229 |
| chr10 | 99615851 | 99616130 |
| chr10 | 99617720 | 99617872 |

|       |           |           |
|-------|-----------|-----------|
| chr10 | 99619519  | 99619800  |
| chr10 | 99624532  | 99624697  |
| chr10 | 99632328  | 99632616  |
| chr10 | 99641871  | 99642090  |
| chr10 | 99656885  | 99657156  |
| chr10 | 99701502  | 99701692  |
| chr10 | 99899919  | 99900070  |
| chr10 | 99907128  | 99907287  |
| chr10 | 99908134  | 99908365  |
| chr10 | 99909960  | 99910346  |
| chr10 | 99910346  | 99910647  |
| chr10 | 99929827  | 99930104  |
| chr10 | 99933307  | 99933494  |
| chr10 | 99933602  | 99933793  |
| chr10 | 99945423  | 99945799  |
| chr10 | 99945882  | 99946177  |
| chr10 | 99948758  | 99949100  |
| chr10 | 99949100  | 99949413  |
| chr10 | 99951307  | 99951639  |
| chr10 | 99951738  | 99951938  |
| chr10 | 99997403  | 99997643  |
| chr10 | 100002401 | 100002705 |
| chr10 | 100015429 | 100015956 |
| chr10 | 100015956 | 100016410 |
| chr10 | 100016426 | 100016728 |
| chr10 | 100020467 | 100020791 |
| chr10 | 100024719 | 100025081 |
| chr10 | 100027877 | 100028088 |
| chr10 | 100030473 | 100030671 |
| chr10 | 100032621 | 100032896 |
| chr10 | 100032896 | 100033204 |
| chr10 | 100055173 | 100055330 |
| chr10 | 100055426 | 100055581 |
| chr10 | 100057185 | 100057400 |
| chr10 | 100059213 | 100059692 |
| chr10 | 100101082 | 100101511 |
| chr10 | 100102183 | 100102507 |
| chr10 | 100119325 | 100119548 |
| chr10 | 100137344 | 100137677 |
| chr10 | 100151905 | 100152158 |
| chr10 | 100152227 | 100152868 |
| chr10 | 100152877 | 100153193 |

|       |           |           |
|-------|-----------|-----------|
| chr10 | 100153283 | 100153790 |
| chr10 | 100160990 | 100161507 |
| chr10 | 100161598 | 100161753 |
| chr10 | 100170944 | 100171122 |
| chr10 | 100180811 | 100180961 |
| chr10 | 100190912 | 100191153 |
| chr10 | 100232684 | 100232885 |
| chr10 | 100402460 | 100402692 |
| chr10 | 100431223 | 100431438 |
| chr10 | 100446174 | 100446328 |
| chr10 | 100460565 | 100460896 |
| chr10 | 100486748 | 100486996 |
| chr10 | 100487012 | 100487908 |
| chr10 | 100519998 | 100520376 |
| chr10 | 100567256 | 100567455 |
| chr10 | 100588629 | 100589136 |
| chr10 | 100589136 | 100589424 |
| chr10 | 100598445 | 100598621 |
| chr10 | 100627428 | 100627616 |
| chr10 | 100958433 | 100958654 |
| chr10 | 100965738 | 100965930 |
| chr10 | 100981110 | 100981356 |
| chr10 | 100981356 | 100981780 |
| chr10 | 100987370 | 100987521 |
| chr10 | 100987904 | 100988168 |
| chr10 | 100997023 | 100997231 |
| chr10 | 101097322 | 101097580 |
| chr10 | 101395744 | 101395915 |
| chr10 | 101582882 | 101583078 |
| chr10 | 101583090 | 101583476 |
| chr10 | 101825760 | 101826054 |
| chr10 | 102125606 | 102125895 |
| chr10 | 102153265 | 102153471 |
| chr10 | 102174631 | 102175180 |
| chr10 | 102175203 | 102175446 |
| chr10 | 102183651 | 102184001 |
| chr10 | 102304702 | 102305109 |
| chr10 | 102341185 | 102341426 |
| chr10 | 102435165 | 102435525 |
| chr10 | 102451838 | 102452073 |
| chr10 | 102498827 | 102499067 |
| chr10 | 102521437 | 102521629 |

|       |           |           |
|-------|-----------|-----------|
| chr10 | 102581226 | 102581577 |
| chr10 | 102622492 | 102622949 |
| chr10 | 102622949 | 102623380 |
| chr10 | 102629617 | 102629968 |
| chr10 | 102639829 | 102640011 |
| chr10 | 102640326 | 102640659 |
| chr10 | 102644918 | 102645173 |
| chr10 | 102645195 | 102645345 |
| chr10 | 102659666 | 102660164 |
| chr10 | 102660164 | 102660678 |
| chr10 | 102661020 | 102661389 |
| chr10 | 102667372 | 102667903 |
| chr10 | 102668567 | 102668771 |
| chr10 | 102683054 | 102683369 |
| chr10 | 102689957 | 102690407 |
| chr10 | 102690407 | 102690798 |
| chr10 | 102705913 | 102706081 |
| chr10 | 102735296 | 102735526 |
| chr10 | 102885561 | 102885776 |
| chr10 | 102885776 | 102885985 |
| chr10 | 103028338 | 103028500 |
| chr10 | 103236170 | 103236425 |
| chr10 | 103367557 | 103367762 |
| chr10 | 103367779 | 103367968 |
| chr10 | 103368634 | 103368819 |
| chr10 | 103368819 | 103368990 |
| chr10 | 103369139 | 103369410 |
| chr10 | 103443064 | 103443347 |
| chr10 | 103504947 | 103505299 |
| chr10 | 103505435 | 103505590 |
| chr10 | 103507175 | 103507336 |
| chr10 | 103783068 | 103783224 |
| chr10 | 104357369 | 104357596 |
| chr10 | 104388237 | 104388599 |
| chr10 | 104448937 | 104449115 |
| chr10 | 104536143 | 104536360 |
| chr10 | 104540680 | 104540885 |
| chr10 | 104629876 | 104630420 |
| chr10 | 104644566 | 104644736 |
| chr10 | 104823449 | 104823621 |
| chr10 | 105123548 | 105123698 |
| chr10 | 105238352 | 105238590 |

|       |           |           |
|-------|-----------|-----------|
| chr10 | 105279954 | 105280269 |
| chr10 | 105281017 | 105281335 |
| chr10 | 105432480 | 105432732 |
| chr10 | 105522458 | 105522746 |
| chr10 | 105522989 | 105523139 |
| chr10 | 105523359 | 105523743 |
| chr10 | 105523743 | 105524197 |
| chr10 | 105535625 | 105535818 |
| chr10 | 105535962 | 105536148 |
| chr10 | 105544675 | 105544898 |
| chr10 | 105573393 | 105573613 |
| chr10 | 105573613 | 105573866 |
| chr10 | 105573866 | 105574119 |
| chr10 | 105574119 | 105574373 |
| chr10 | 105574373 | 105574640 |
| chr10 | 105574640 | 105575044 |
| chr10 | 105575126 | 105575597 |
| chr10 | 105579378 | 105579536 |
| chr10 | 105580533 | 105581055 |
| chr10 | 105632026 | 105632219 |
| chr10 | 105676633 | 105676806 |
| chr10 | 105774466 | 105774725 |
| chr10 | 105834735 | 105834900 |
| chr10 | 105840873 | 105841236 |
| chr10 | 105841236 | 105841523 |
| chr10 | 105841523 | 105841906 |
| chr10 | 105880861 | 105881011 |
| chr10 | 105901137 | 105901299 |
| chr10 | 106006126 | 106006453 |
| chr10 | 106163424 | 106163614 |
| chr10 | 106429051 | 106429397 |
| chr10 | 106770144 | 106770294 |
| chr10 | 106775267 | 106775674 |
| chr10 | 106775674 | 106776055 |
| chr10 | 106776389 | 106776620 |
| chr10 | 106776857 | 106777014 |
| chr10 | 107272418 | 107272615 |
| chr10 | 107342795 | 107343118 |
| chr10 | 107389689 | 107389839 |
| chr10 | 107467894 | 107468133 |
| chr10 | 107493577 | 107493827 |
| chr10 | 107502260 | 107502503 |

|       |           |           |
|-------|-----------|-----------|
| chr10 | 107534148 | 107534381 |
| chr10 | 107601472 | 107601624 |
| chr10 | 107601624 | 107601768 |
| chr10 | 107624177 | 107624645 |
| chr10 | 107632586 | 107632868 |
| chr10 | 107658472 | 107658810 |
| chr10 | 107658810 | 107659137 |
| chr10 | 107659185 | 107659492 |
| chr10 | 107662468 | 107662727 |
| chr10 | 107662773 | 107662996 |
| chr10 | 107696741 | 107696915 |
| chr10 | 107765166 | 107765337 |
| chr10 | 107800046 | 107800288 |
| chr10 | 107858779 | 107859009 |
| chr10 | 107912996 | 107913314 |
| chr10 | 107921600 | 107921898 |
| chr10 | 107922141 | 107922370 |
| chr10 | 107930648 | 107930934 |
| chr10 | 107932498 | 107932823 |
| chr10 | 107933551 | 107933946 |
| chr10 | 107934167 | 107934474 |
| chr10 | 107950034 | 107950213 |
| chr10 | 107951667 | 107951919 |
| chr10 | 107966977 | 107967591 |
| chr10 | 107989048 | 107989252 |
| chr10 | 107994810 | 107995028 |
| chr10 | 107995028 | 107995229 |
| chr10 | 107995229 | 107995494 |
| chr10 | 108008974 | 108009446 |
| chr10 | 108015973 | 108016494 |
| chr10 | 108020158 | 108020346 |
| chr10 | 108030146 | 108030303 |
| chr10 | 108030639 | 108030815 |
| chr10 | 108033316 | 108033569 |
| chr10 | 108033569 | 108033825 |
| chr10 | 108064021 | 108064333 |
| chr10 | 108064500 | 108064667 |
| chr10 | 108066323 | 108066587 |
| chr10 | 108072218 | 108072646 |
| chr10 | 108083346 | 108083497 |
| chr10 | 108108661 | 108108979 |
| chr10 | 108108979 | 108109470 |

|       |           |           |
|-------|-----------|-----------|
| chr10 | 108113353 | 108113856 |
| chr10 | 108120021 | 108120202 |
| chr10 | 108161445 | 108162383 |
| chr10 | 108162383 | 108162790 |
| chr10 | 108162790 | 108163026 |
| chr10 | 108170830 | 108171128 |
| chr10 | 108172885 | 108173218 |
| chr10 | 108173218 | 108173613 |
| chr10 | 108185436 | 108185705 |
| chr10 | 108190727 | 108190877 |
| chr10 | 108201466 | 108201664 |
| chr10 | 108201727 | 108201946 |
| chr10 | 108237100 | 108237371 |
| chr10 | 108291742 | 108292016 |
| chr10 | 108294362 | 108294690 |
| chr10 | 108299810 | 108300233 |
| chr10 | 108300866 | 108301275 |
| chr10 | 108307576 | 108307849 |
| chr10 | 108307849 | 108308246 |
| chr10 | 108331031 | 108331452 |
| chr10 | 108331586 | 108331819 |
| chr10 | 108331819 | 108332018 |
| chr10 | 108332018 | 108332244 |
| chr10 | 108332244 | 108332525 |
| chr10 | 108332525 | 108332942 |
| chr10 | 108333010 | 108333186 |
| chr10 | 108333243 | 108333457 |
| chr10 | 108338040 | 108338484 |
| chr10 | 108356715 | 108356919 |
| chr10 | 108372309 | 108372593 |
| chr10 | 108372644 | 108372889 |
| chr10 | 108372889 | 108373235 |
| chr10 | 108377745 | 108378100 |
| chr10 | 108378100 | 108378432 |
| chr10 | 108378432 | 108378709 |
| chr10 | 108400961 | 108401111 |
| chr10 | 108403591 | 108403791 |
| chr10 | 108407426 | 108407702 |
| chr10 | 108408147 | 108408305 |
| chr10 | 108432202 | 108432603 |
| chr10 | 108434088 | 108434247 |
| chr10 | 108434769 | 108435085 |



|       |           |           |
|-------|-----------|-----------|
| chr10 | 108435096 | 108435292 |
| chr10 | 108435670 | 108435977 |
| chr10 | 108444552 | 108444792 |
| chr10 | 108445181 | 108445470 |
| chr10 | 108445604 | 108445999 |
| chr10 | 108446086 | 108446343 |
| chr10 | 108446415 | 108447071 |
| chr10 | 108448480 | 108448721 |
| chr10 | 108452521 | 108452727 |
| chr10 | 108463499 | 108463820 |
| chr10 | 108505022 | 108505313 |
| chr10 | 108508310 | 108508622 |
| chr10 | 108510265 | 108510459 |
| chr10 | 108531117 | 108531492 |
| chr10 | 108531492 | 108531817 |
| chr10 | 108531817 | 108532157 |
| chr10 | 108532349 | 108532609 |
| chr10 | 108537712 | 108537953 |
| chr10 | 108538375 | 108538644 |
| chr10 | 108538644 | 108539100 |
| chr10 | 108541661 | 108541830 |
| chr10 | 108545612 | 108545971 |
| chr10 | 108564213 | 108564420 |
| chr10 | 108564420 | 108564683 |
| chr10 | 108581208 | 108581619 |
| chr10 | 108581619 | 108582043 |
| chr10 | 108582106 | 108582399 |
| chr10 | 108947302 | 108947469 |
| chr10 | 109000908 | 109001131 |
| chr10 | 109010547 | 109010778 |
| chr10 | 109010864 | 109011183 |
| chr10 | 109011403 | 109011803 |
| chr10 | 109480648 | 109480819 |
| chr10 | 109487245 | 109487581 |
| chr10 | 109515019 | 109515256 |
| chr10 | 109515256 | 109515698 |
| chr10 | 109536672 | 109536984 |
| chr10 | 109584331 | 109584596 |
| chr10 | 109665048 | 109665210 |
| chr10 | 109693571 | 109693733 |
| chr10 | 109852522 | 109852672 |
| chr10 | 109869368 | 109869824 |

|       |           |           |
|-------|-----------|-----------|
| chr10 | 109903968 | 109904173 |
| chr10 | 109920840 | 109921054 |
| chr10 | 110141585 | 110141815 |
| chr10 | 110188586 | 110188790 |
| chr10 | 110191950 | 110192165 |
| chr10 | 110248366 | 110248594 |
| chr10 | 110323536 | 110323996 |
| chr10 | 110331459 | 110332026 |
| chr10 | 110445948 | 110446167 |
| chr10 | 110455140 | 110455393 |
| chr10 | 110455458 | 110456302 |
| chr10 | 110484829 | 110485255 |
| chr10 | 110526321 | 110526471 |
| chr10 | 110526609 | 110526791 |
| chr10 | 110546868 | 110547154 |
| chr10 | 110554053 | 110554361 |
| chr10 | 110565544 | 110565932 |
| chr10 | 110565983 | 110566259 |
| chr10 | 110566259 | 110566715 |
| chr10 | 110573537 | 110573880 |
| chr10 | 110727861 | 110728174 |
| chr10 | 110728405 | 110728943 |
| chr10 | 110733402 | 110733655 |
| chr10 | 110744155 | 110744450 |
| chr10 | 110744854 | 110745233 |
| chr10 | 110745233 | 110745964 |
| chr10 | 110749969 | 110750273 |
| chr10 | 110760619 | 110760884 |
| chr10 | 110777957 | 110778199 |
| chr10 | 110782787 | 110782994 |
| chr10 | 110794572 | 110794820 |
| chr10 | 110804389 | 110804880 |
| chr10 | 110805092 | 110805250 |
| chr10 | 110903928 | 110904205 |
| chr10 | 110919693 | 110920031 |
| chr10 | 110920031 | 110920380 |
| chr10 | 110920380 | 110920682 |
| chr10 | 110926936 | 110927142 |
| chr10 | 110927142 | 110927371 |
| chr10 | 110927430 | 110927689 |
| chr10 | 110927689 | 110927962 |
| chr10 | 110974558 | 110974710 |

|       |           |           |
|-------|-----------|-----------|
| chr10 | 110976128 | 110976376 |
| chr10 | 111009417 | 111009883 |
| chr10 | 111009883 | 111010158 |
| chr10 | 111010158 | 111010575 |
| chr10 | 111048003 | 111048247 |
| chr10 | 111055881 | 111056042 |
| chr10 | 111079195 | 111079445 |
| chr10 | 111100203 | 111100356 |
| chr10 | 111103123 | 111103397 |
| chr10 | 111107438 | 111107668 |
| chr10 | 111108826 | 111109059 |
| chr10 | 111127435 | 111127857 |
| chr10 | 111137923 | 111138472 |
| chr10 | 111153967 | 111154165 |
| chr10 | 111164285 | 111164718 |
| chr10 | 111164718 | 111165015 |
| chr10 | 111165015 | 111165324 |
| chr10 | 111165324 | 111165528 |
| chr10 | 111165528 | 111165740 |
| chr10 | 111180722 | 111180939 |
| chr10 | 111189127 | 111189288 |
| chr10 | 111190671 | 111190941 |
| chr10 | 111190941 | 111191194 |
| chr10 | 111210094 | 111210244 |
| chr10 | 111213711 | 111213914 |
| chr10 | 111213942 | 111214468 |
| chr10 | 111226482 | 111227206 |
| chr10 | 111234513 | 111234766 |
| chr10 | 111256225 | 111256482 |
| chr10 | 111257274 | 111257787 |
| chr10 | 111280303 | 111280806 |
| chr10 | 111289884 | 111290143 |
| chr10 | 111298216 | 111298768 |
| chr10 | 111298768 | 111299080 |
| chr10 | 111313409 | 111313629 |
| chr10 | 111363920 | 111364149 |
| chr10 | 111364149 | 111364406 |
| chr10 | 111364406 | 111364658 |
| chr10 | 111364929 | 111365463 |
| chr10 | 111369080 | 111369387 |
| chr10 | 111373924 | 111374528 |
| chr10 | 111388625 | 111389003 |

|       |           |           |
|-------|-----------|-----------|
| chr10 | 111389005 | 111389223 |
| chr10 | 111389727 | 111390324 |
| chr10 | 111404788 | 111404971 |
| chr10 | 111472783 | 111473401 |
| chr10 | 111473401 | 111473763 |
| chr10 | 111473763 | 111473951 |
| chr10 | 111474215 | 111474402 |
| chr10 | 111478765 | 111478931 |
| chr10 | 111478931 | 111479137 |
| chr10 | 111479380 | 111479544 |
| chr10 | 111488698 | 111488885 |
| chr10 | 111488885 | 111489052 |
| chr10 | 111496015 | 111496165 |
| chr10 | 111506035 | 111506777 |
| chr10 | 111506777 | 111507167 |
| chr10 | 111507167 | 111507446 |
| chr10 | 111507446 | 111507726 |
| chr10 | 111515108 | 111515756 |
| chr10 | 111515842 | 111516228 |
| chr10 | 111516228 | 111516675 |
| chr10 | 111516786 | 111517224 |
| chr10 | 111522245 | 111522578 |
| chr10 | 111527106 | 111527357 |
| chr10 | 111527669 | 111527978 |
| chr10 | 111528279 | 111528793 |
| chr10 | 111529161 | 111529545 |
| chr10 | 111543605 | 111544368 |
| chr10 | 111544848 | 111545076 |
| chr10 | 111550121 | 111550352 |
| chr10 | 111550352 | 111550662 |
| chr10 | 111556267 | 111556513 |
| chr10 | 111558005 | 111558592 |
| chr10 | 111558592 | 111559016 |
| chr10 | 111559016 | 111559366 |
| chr10 | 111559366 | 111559647 |
| chr10 | 111569231 | 111569478 |
| chr10 | 111570631 | 111571401 |
| chr10 | 111575362 | 111575583 |
| chr10 | 111575727 | 111575880 |
| chr10 | 111575918 | 111576300 |
| chr10 | 111576300 | 111576661 |
| chr10 | 111576661 | 111576997 |

|       |           |           |
|-------|-----------|-----------|
| chr10 | 111577032 | 111577329 |
| chr10 | 111583431 | 111583870 |
| chr10 | 111583870 | 111584257 |
| chr10 | 111584257 | 111584496 |
| chr10 | 111591247 | 111591524 |
| chr10 | 111599667 | 111599871 |
| chr10 | 111599871 | 111600063 |
| chr10 | 111600099 | 111600596 |
| chr10 | 111600596 | 111601177 |
| chr10 | 111618931 | 111619212 |
| chr10 | 111619541 | 111619783 |
| chr10 | 111619783 | 111619979 |
| chr10 | 111619979 | 111620450 |
| chr10 | 111621041 | 111621257 |
| chr10 | 111622859 | 111623121 |
| chr10 | 111635552 | 111635858 |
| chr10 | 111636228 | 111636491 |
| chr10 | 111636859 | 111637359 |
| chr10 | 111637359 | 111637731 |
| chr10 | 111639946 | 111640240 |
| chr10 | 111640563 | 111640790 |
| chr10 | 111641587 | 111641983 |
| chr10 | 111654421 | 111654771 |
| chr10 | 111654793 | 111654954 |
| chr10 | 111666376 | 111666578 |
| chr10 | 111666718 | 111666885 |
| chr10 | 111668201 | 111668416 |
| chr10 | 111672495 | 111672690 |
| chr10 | 111672720 | 111673461 |
| chr10 | 111684971 | 111685306 |
| chr10 | 111685571 | 111685721 |
| chr10 | 111694326 | 111694607 |
| chr10 | 111694948 | 111695295 |
| chr10 | 111696571 | 111696721 |
| chr10 | 111713674 | 111714083 |
| chr10 | 111714083 | 111714525 |
| chr10 | 111715037 | 111715786 |
| chr10 | 111719612 | 111719890 |
| chr10 | 111723992 | 111724194 |
| chr10 | 111741079 | 111741229 |
| chr10 | 111741347 | 111741630 |
| chr10 | 111741630 | 111741898 |

|       |           |           |
|-------|-----------|-----------|
| chr10 | 111746089 | 111746514 |
| chr10 | 111746938 | 111747109 |
| chr10 | 111762400 | 111762597 |
| chr10 | 111769664 | 111770014 |
| chr10 | 111770014 | 111770423 |
| chr10 | 111776876 | 111777026 |
| chr10 | 111777653 | 111777872 |
| chr10 | 111780687 | 111780993 |
| chr10 | 111794252 | 111794489 |
| chr10 | 111795174 | 111795415 |
| chr10 | 111795751 | 111796245 |
| chr10 | 111806484 | 111806822 |
| chr10 | 111813777 | 111814128 |
| chr10 | 111824245 | 111824482 |
| chr10 | 111826247 | 111826726 |
| chr10 | 111826857 | 111827025 |
| chr10 | 111827025 | 111827196 |
| chr10 | 111827323 | 111827557 |
| chr10 | 111827649 | 111827985 |
| chr10 | 111828742 | 111829061 |
| chr10 | 111836866 | 111837144 |
| chr10 | 111842952 | 111843237 |
| chr10 | 111858471 | 111858685 |
| chr10 | 111874317 | 111874690 |
| chr10 | 111877481 | 111877698 |
| chr10 | 111878751 | 111878976 |
| chr10 | 111880346 | 111880733 |
| chr10 | 111896889 | 111897175 |
| chr10 | 111925530 | 111925854 |
| chr10 | 111935263 | 111935594 |
| chr10 | 111936374 | 111936832 |
| chr10 | 111936832 | 111937227 |
| chr10 | 111947711 | 111947865 |
| chr10 | 111957753 | 111958044 |
| chr10 | 111959536 | 111959717 |
| chr10 | 111959926 | 111960231 |
| chr10 | 111960231 | 111960520 |
| chr10 | 111960520 | 111960874 |
| chr10 | 111962265 | 111962607 |
| chr10 | 111966398 | 111966695 |
| chr10 | 111972461 | 111972831 |
| chr10 | 111972831 | 111973287 |

|       |           |           |
|-------|-----------|-----------|
| chr10 | 111977647 | 111977910 |
| chr10 | 111978426 | 111979043 |
| chr10 | 111982358 | 111982509 |
| chr10 | 111990112 | 111990377 |
| chr10 | 111995815 | 111996155 |
| chr10 | 111996535 | 111996924 |
| chr10 | 111997145 | 111997371 |
| chr10 | 111997683 | 111998080 |
| chr10 | 111999087 | 111999328 |
| chr10 | 112000445 | 112000633 |
| chr10 | 112001454 | 112001614 |
| chr10 | 112001684 | 112001847 |
| chr10 | 112002662 | 112002832 |
| chr10 | 112051273 | 112051542 |
| chr10 | 112051758 | 112051938 |
| chr10 | 112052023 | 112052234 |
| chr10 | 112060006 | 112060302 |
| chr10 | 112094222 | 112094473 |
| chr10 | 112105733 | 112106099 |
| chr10 | 112160072 | 112160532 |
| chr10 | 112203581 | 112203736 |
| chr10 | 112204425 | 112204651 |
| chr10 | 112267595 | 112267767 |
| chr10 | 112269957 | 112270135 |
| chr10 | 112270144 | 112270434 |
| chr10 | 112270434 | 112270688 |
| chr10 | 112270974 | 112271201 |
| chr10 | 112271648 | 112271815 |
| chr10 | 112271815 | 112272001 |
| chr10 | 112403826 | 112404000 |
| chr10 | 112481510 | 112481793 |
| chr10 | 112481974 | 112482236 |
| chr10 | 112564783 | 112564948 |
| chr10 | 112569749 | 112569917 |
| chr10 | 112611804 | 112612023 |
| chr10 | 112613818 | 112614046 |
| chr10 | 112614142 | 112614641 |
| chr10 | 112614715 | 112614865 |
| chr10 | 112629815 | 112630097 |
| chr10 | 112630097 | 112630353 |
| chr10 | 112650443 | 112650690 |
| chr10 | 112653668 | 112653993 |

|       |           |           |
|-------|-----------|-----------|
| chr10 | 112660206 | 112660356 |
| chr10 | 112675147 | 112675690 |
| chr10 | 112728086 | 112728236 |
| chr10 | 112743953 | 112744298 |
| chr10 | 112788275 | 112788622 |
| chr10 | 112801665 | 112801883 |
| chr10 | 112802261 | 112802546 |
| chr10 | 112804983 | 112805133 |
| chr10 | 112806549 | 112806761 |
| chr10 | 112810067 | 112810647 |
| chr10 | 112882854 | 112883100 |
| chr10 | 112883100 | 112883410 |
| chr10 | 112883410 | 112883839 |
| chr10 | 112928344 | 112928641 |
| chr10 | 112928641 | 112928910 |
| chr10 | 112928910 | 112929225 |
| chr10 | 112930386 | 112930542 |
| chr10 | 113520480 | 113520670 |
| chr10 | 113540170 | 113540459 |
| chr10 | 113561768 | 113562081 |
| chr10 | 113562081 | 113562328 |
| chr10 | 113562328 | 113562593 |
| chr10 | 113736332 | 113736637 |
| chr10 | 113889127 | 113889472 |
| chr10 | 113920154 | 113920436 |
| chr10 | 114256000 | 114256150 |
| chr10 | 114737309 | 114737513 |
| chr10 | 114874795 | 114875036 |
| chr10 | 114987964 | 114988170 |
| chr10 | 114988567 | 114988731 |
| chr10 | 115097236 | 115097473 |
| chr10 | 115100189 | 115100484 |
| chr10 | 115175350 | 115175987 |
| chr10 | 115184749 | 115185124 |
| chr10 | 115193016 | 115193229 |
| chr10 | 115225653 | 115226112 |
| chr10 | 115229120 | 115229276 |
| chr10 | 115236802 | 115237067 |
| chr10 | 115241174 | 115241445 |
| chr10 | 115241445 | 115241685 |
| chr10 | 115241876 | 115242190 |
| chr10 | 115242218 | 115242639 |



|       |           |           |
|-------|-----------|-----------|
| chr10 | 115250446 | 115250720 |
| chr10 | 115250882 | 115251088 |
| chr10 | 115251095 | 115251326 |
| chr10 | 115251326 | 115251779 |
| chr10 | 115252283 | 115252718 |
| chr10 | 115256222 | 115256519 |
| chr10 | 115261560 | 115261751 |
| chr10 | 115262294 | 115262658 |
| chr10 | 115262987 | 115263275 |
| chr10 | 115263275 | 115263596 |
| chr10 | 115280770 | 115280981 |
| chr10 | 115280981 | 115281217 |
| chr10 | 115315173 | 115315493 |
| chr10 | 115315493 | 115315787 |
| chr10 | 115315787 | 115316232 |
| chr10 | 115323368 | 115323615 |
| chr10 | 115332104 | 115332298 |
| chr10 | 115332300 | 115332731 |
| chr10 | 115350964 | 115351289 |
| chr10 | 115354616 | 115354867 |
| chr10 | 115362069 | 115362675 |
| chr10 | 115362688 | 115362873 |
| chr10 | 115384104 | 115384675 |
| chr10 | 115384675 | 115385117 |
| chr10 | 115385117 | 115385507 |
| chr10 | 115385507 | 115385707 |
| chr10 | 115385707 | 115385908 |
| chr10 | 115393643 | 115393803 |
| chr10 | 115395992 | 115396387 |
| chr10 | 115406508 | 115406693 |
| chr10 | 115435427 | 115435709 |
| chr10 | 115435838 | 115436204 |
| chr10 | 115436320 | 115436606 |
| chr10 | 115438652 | 115438830 |
| chr10 | 115438992 | 115439349 |
| chr10 | 115451621 | 115451862 |
| chr10 | 115452010 | 115452186 |
| chr10 | 115492192 | 115492409 |
| chr10 | 115493028 | 115493290 |
| chr10 | 115557287 | 115557498 |
| chr10 | 115557639 | 115557815 |
| chr10 | 115572872 | 115573230 |

|       |           |           |
|-------|-----------|-----------|
| chr10 | 115573230 | 115573472 |
| chr10 | 115573472 | 115573650 |
| chr10 | 115576480 | 115576758 |
| chr10 | 115586189 | 115586483 |
| chr10 | 115586483 | 115586692 |
| chr10 | 115586829 | 115587271 |
| chr10 | 115587271 | 115587640 |
| chr10 | 115587640 | 115587985 |
| chr10 | 115617526 | 115617778 |
| chr10 | 115618156 | 115618322 |
| chr10 | 115620275 | 115620496 |
| chr10 | 115623486 | 115623742 |
| chr10 | 115665428 | 115665638 |
| chr10 | 115687388 | 115687576 |
| chr10 | 115742660 | 115742939 |
| chr10 | 115758770 | 115758925 |
| chr10 | 115780095 | 115780817 |
| chr10 | 115787922 | 115788095 |
| chr10 | 115809242 | 115809440 |
| chr10 | 115814383 | 115814637 |
| chr10 | 115814637 | 115815107 |
| chr10 | 115815791 | 115816073 |
| chr10 | 115816438 | 115816903 |
| chr10 | 115817080 | 115817395 |
| chr10 | 115821762 | 115821969 |
| chr10 | 115828918 | 115829253 |
| chr10 | 115931620 | 115931793 |
| chr10 | 116017804 | 116018154 |
| chr10 | 116018154 | 116018781 |
| chr10 | 116019112 | 116019420 |
| chr10 | 116098623 | 116098778 |
| chr10 | 116147253 | 116147428 |
| chr10 | 116155366 | 116155848 |
| chr10 | 116175411 | 116175877 |
| chr10 | 116180607 | 116180780 |
| chr10 | 116180812 | 116181466 |
| chr10 | 116183357 | 116183561 |
| chr10 | 116186822 | 116187063 |
| chr10 | 116187345 | 116187679 |
| chr10 | 116187805 | 116188013 |
| chr10 | 116192330 | 116192698 |
| chr10 | 116192985 | 116193135 |

|       |           |           |
|-------|-----------|-----------|
| chr10 | 116196360 | 116196656 |
| chr10 | 116196672 | 116196971 |
| chr10 | 116196974 | 116197351 |
| chr10 | 116197366 | 116197569 |
| chr10 | 116208041 | 116208321 |
| chr10 | 116208398 | 116208548 |
| chr10 | 116220387 | 116220733 |
| chr10 | 116224872 | 116225022 |
| chr10 | 116243443 | 116243685 |
| chr10 | 116254085 | 116254357 |
| chr10 | 116260691 | 116261005 |
| chr10 | 116261005 | 116261250 |
| chr10 | 116261250 | 116261472 |
| chr10 | 116266481 | 116266893 |
| chr10 | 116266893 | 116267161 |
| chr10 | 116267161 | 116267396 |
| chr10 | 116267396 | 116267652 |
| chr10 | 116267652 | 116268025 |
| chr10 | 116268383 | 116268598 |
| chr10 | 116280063 | 116280256 |
| chr10 | 116296434 | 116296888 |
| chr10 | 116297607 | 116297771 |
| chr10 | 116297780 | 116298234 |
| chr10 | 116298234 | 116298575 |
| chr10 | 116298855 | 116299059 |
| chr10 | 116304480 | 116304733 |
| chr10 | 116304877 | 116305278 |
| chr10 | 116316618 | 116316817 |
| chr10 | 116319285 | 116319555 |
| chr10 | 116330498 | 116330747 |
| chr10 | 116335446 | 116335629 |
| chr10 | 116341989 | 116342169 |
| chr10 | 116376957 | 116377574 |
| chr10 | 116384980 | 116385151 |
| chr10 | 116393600 | 116393761 |
| chr10 | 116410778 | 116411117 |
| chr10 | 116422664 | 116422842 |
| chr10 | 116430865 | 116431276 |
| chr10 | 116457937 | 116458184 |
| chr10 | 116462913 | 116463307 |
| chr10 | 116473026 | 116473600 |
| chr10 | 116473600 | 116474179 |

|       |           |           |
|-------|-----------|-----------|
| chr10 | 116474179 | 116474593 |
| chr10 | 116501425 | 116501767 |
| chr10 | 116506203 | 116506452 |
| chr10 | 116525087 | 116525284 |
| chr10 | 116528779 | 116529348 |
| chr10 | 116530159 | 116530381 |
| chr10 | 116531173 | 116531383 |
| chr10 | 116536660 | 116537063 |
| chr10 | 116537063 | 116537429 |
| chr10 | 116537588 | 116537768 |
| chr10 | 116548045 | 116548334 |
| chr10 | 116580907 | 116581380 |
| chr10 | 116581380 | 116581774 |
| chr10 | 116581774 | 116582168 |
| chr10 | 116582168 | 116582442 |
| chr10 | 116596514 | 116596671 |
| chr10 | 116615478 | 116615628 |
| chr10 | 116616065 | 116616395 |
| chr10 | 116626098 | 116626248 |
| chr10 | 116666949 | 116667227 |
| chr10 | 116669945 | 116670143 |
| chr10 | 116693851 | 116694104 |
| chr10 | 116725110 | 116725450 |
| chr10 | 116733527 | 116734253 |
| chr10 | 116748961 | 116749282 |
| chr10 | 116749529 | 116749836 |
| chr10 | 116750084 | 116750401 |
| chr10 | 116750856 | 116751404 |
| chr10 | 116754967 | 116755117 |
| chr10 | 116763145 | 116763390 |
| chr10 | 116769344 | 116769629 |
| chr10 | 116769629 | 116769871 |
| chr10 | 116770017 | 116770270 |
| chr10 | 116787757 | 116787924 |
| chr10 | 116788153 | 116788354 |
| chr10 | 116789224 | 116789479 |
| chr10 | 116796610 | 116796846 |
| chr10 | 116827326 | 116827669 |
| chr10 | 116848825 | 116849071 |
| chr10 | 116849071 | 116849256 |
| chr10 | 116849256 | 116849406 |
| chr10 | 116874383 | 116874539 |

|       |           |           |
|-------|-----------|-----------|
| chr10 | 116876022 | 116876194 |
| chr10 | 116878386 | 116878622 |
| chr10 | 116879138 | 116879473 |
| chr10 | 116889987 | 116890210 |
| chr10 | 116893889 | 116894045 |
| chr10 | 116900945 | 116901204 |
| chr10 | 116928688 | 116928891 |
| chr10 | 116928891 | 116929186 |
| chr10 | 116929228 | 116929383 |
| chr10 | 116930101 | 116930445 |
| chr10 | 116930561 | 116930821 |
| chr10 | 116944242 | 116944437 |
| chr10 | 116947782 | 116948013 |
| chr10 | 116949609 | 116949897 |
| chr10 | 116949970 | 116950281 |
| chr10 | 116950281 | 116950475 |
| chr10 | 116950475 | 116950856 |
| chr10 | 116980939 | 116981206 |
| chr10 | 116982581 | 116983020 |
| chr10 | 116994043 | 116994196 |
| chr10 | 116995729 | 116995938 |
| chr10 | 116995938 | 116996229 |
| chr10 | 116996229 | 116996697 |
| chr10 | 116998849 | 116999010 |
| chr10 | 116999074 | 116999431 |
| chr10 | 117010069 | 117010480 |
| chr10 | 117014725 | 117014928 |
| chr10 | 117017425 | 117017969 |
| chr10 | 117021044 | 117021410 |
| chr10 | 117023550 | 117024350 |
| chr10 | 117033725 | 117034328 |
| chr10 | 117040442 | 117040667 |
| chr10 | 117040722 | 117040917 |
| chr10 | 117040917 | 117041160 |
| chr10 | 117043502 | 117043840 |
| chr10 | 117043840 | 117044056 |
| chr10 | 117048964 | 117049114 |
| chr10 | 117049762 | 117049950 |
| chr10 | 117050048 | 117050281 |
| chr10 | 117050281 | 117050576 |
| chr10 | 117052639 | 117052868 |
| chr10 | 117055800 | 117055970 |

|       |           |           |
|-------|-----------|-----------|
| chr10 | 117063236 | 117063475 |
| chr10 | 117063475 | 117063719 |
| chr10 | 117063719 | 117064080 |
| chr10 | 117069243 | 117069419 |
| chr10 | 117073233 | 117073440 |
| chr10 | 117078330 | 117078641 |
| chr10 | 117100230 | 117100515 |
| chr10 | 117106402 | 117106579 |
| chr10 | 117111165 | 117111483 |
| chr10 | 117111645 | 117111842 |
| chr10 | 117112607 | 117112853 |
| chr10 | 117113537 | 117113762 |
| chr10 | 117118554 | 117118730 |
| chr10 | 117124684 | 117124862 |
| chr10 | 117130045 | 117130332 |
| chr10 | 117131115 | 117131297 |
| chr10 | 117131471 | 117131833 |
| chr10 | 117142048 | 117142217 |
| chr10 | 117147862 | 117148096 |
| chr10 | 117148096 | 117148386 |
| chr10 | 117148386 | 117148704 |
| chr10 | 117148704 | 117148972 |
| chr10 | 117150121 | 117150510 |
| chr10 | 117151328 | 117151566 |
| chr10 | 117167096 | 117167358 |
| chr10 | 117171590 | 117171839 |
| chr10 | 117172134 | 117172370 |
| chr10 | 117173581 | 117173856 |
| chr10 | 117173856 | 117174090 |
| chr10 | 117174654 | 117174953 |
| chr10 | 117208534 | 117208740 |
| chr10 | 117209271 | 117209462 |
| chr10 | 117209462 | 117209662 |
| chr10 | 117209662 | 117209948 |
| chr10 | 117216868 | 117217157 |
| chr10 | 117217278 | 117217620 |
| chr10 | 117223824 | 117224330 |
| chr10 | 117224330 | 117224622 |
| chr10 | 117224622 | 117224863 |
| chr10 | 117229904 | 117230099 |
| chr10 | 117250097 | 117250254 |
| chr10 | 117259302 | 117259605 |

|       |           |           |
|-------|-----------|-----------|
| chr10 | 117275367 | 117275687 |
| chr10 | 117275744 | 117276031 |
| chr10 | 117276034 | 117276192 |
| chr10 | 117277808 | 117277991 |
| chr10 | 117289059 | 117289232 |
| chr10 | 117330638 | 117330834 |
| chr10 | 117363157 | 117363410 |
| chr10 | 117364985 | 117365524 |
| chr10 | 117376231 | 117376619 |
| chr10 | 117376619 | 117376869 |
| chr10 | 117376869 | 117377236 |
| chr10 | 117387834 | 117388072 |
| chr10 | 117393214 | 117393684 |
| chr10 | 117402545 | 117402730 |
| chr10 | 117417427 | 117417717 |
| chr10 | 117418177 | 117418338 |
| chr10 | 117432465 | 117432677 |
| chr10 | 117435409 | 117435708 |
| chr10 | 117435708 | 117436039 |
| chr10 | 117436795 | 117437035 |
| chr10 | 117453000 | 117453249 |
| chr10 | 117455556 | 117455810 |
| chr10 | 117459020 | 117459261 |
| chr10 | 117480902 | 117481052 |
| chr10 | 117483787 | 117484004 |
| chr10 | 117490390 | 117490649 |
| chr10 | 117494475 | 117494625 |
| chr10 | 117511061 | 117511283 |
| chr10 | 117515867 | 117516094 |
| chr10 | 117516272 | 117516504 |
| chr10 | 117518793 | 117519118 |
| chr10 | 117521540 | 117521913 |
| chr10 | 117521913 | 117522185 |
| chr10 | 117522267 | 117522542 |
| chr10 | 117522827 | 117523046 |
| chr10 | 117529790 | 117530054 |
| chr10 | 117530842 | 117531010 |
| chr10 | 117570347 | 117570499 |
| chr10 | 117571395 | 117571631 |
| chr10 | 117587509 | 117587659 |
| chr10 | 117599093 | 117599378 |
| chr10 | 117624238 | 117624398 |

|       |           |           |
|-------|-----------|-----------|
| chr10 | 117625895 | 117626045 |
| chr10 | 117628987 | 117629568 |
| chr10 | 117629568 | 117629808 |
| chr10 | 117629808 | 117630008 |
| chr10 | 117637157 | 117637346 |
| chr10 | 117649804 | 117650050 |
| chr10 | 117650973 | 117651422 |
| chr10 | 117662697 | 117663059 |
| chr10 | 117663059 | 117663507 |
| chr10 | 117663507 | 117663862 |
| chr10 | 117663862 | 117664143 |
| chr10 | 117664155 | 117664360 |
| chr10 | 117677296 | 117677821 |
| chr10 | 117682611 | 117682770 |
| chr10 | 117687598 | 117687903 |
| chr10 | 117688266 | 117688575 |
| chr10 | 117688679 | 117688841 |
| chr10 | 117689160 | 117689368 |
| chr10 | 117697551 | 117697783 |
| chr10 | 117709946 | 117710279 |
| chr10 | 117710279 | 117710565 |
| chr10 | 117710565 | 117710785 |
| chr10 | 117710785 | 117711025 |
| chr10 | 117716389 | 117716579 |
| chr10 | 117717609 | 117717950 |
| chr10 | 117718560 | 117718792 |
| chr10 | 117721468 | 117721829 |
| chr10 | 117729357 | 117729884 |
| chr10 | 117730168 | 117730366 |
| chr10 | 117731330 | 117731526 |
| chr10 | 117734183 | 117734441 |
| chr10 | 117745619 | 117746079 |
| chr10 | 117746079 | 117746766 |
| chr10 | 117757188 | 117757489 |
| chr10 | 117757489 | 117757697 |
| chr10 | 117768759 | 117768969 |
| chr10 | 117768969 | 117769245 |
| chr10 | 117769245 | 117769509 |
| chr10 | 117769509 | 117769702 |
| chr10 | 117784902 | 117785117 |
| chr10 | 117786146 | 117786429 |
| chr10 | 117792150 | 117792500 |



|       |           |           |
|-------|-----------|-----------|
| chr10 | 117792500 | 117792823 |
| chr10 | 117792823 | 117793152 |
| chr10 | 117801264 | 117801481 |
| chr10 | 117801487 | 117801864 |
| chr10 | 117808179 | 117808340 |
| chr10 | 117808999 | 117809220 |
| chr10 | 117809220 | 117809485 |
| chr10 | 117813253 | 117813482 |
| chr10 | 117816610 | 117816773 |
| chr10 | 117818197 | 117818384 |
| chr10 | 117836510 | 117836697 |
| chr10 | 117838930 | 117839284 |
| chr10 | 117845190 | 117845590 |
| chr10 | 117845590 | 117845919 |
| chr10 | 117845919 | 117846192 |
| chr10 | 117846192 | 117846646 |
| chr10 | 117860300 | 117860512 |
| chr10 | 117860643 | 117860927 |
| chr10 | 117860927 | 117861225 |
| chr10 | 117861960 | 117862480 |
| chr10 | 117867210 | 117868094 |
| chr10 | 117873966 | 117874298 |
| chr10 | 117891420 | 117891604 |
| chr10 | 117899494 | 117899711 |
| chr10 | 117905663 | 117905831 |
| chr10 | 117906279 | 117906589 |
| chr10 | 117915437 | 117915707 |
| chr10 | 117916296 | 117916657 |
| chr10 | 117936475 | 117936735 |
| chr10 | 117940811 | 117941247 |
| chr10 | 117941247 | 117941486 |
| chr10 | 117976366 | 117976668 |
| chr10 | 117979160 | 117979352 |
| chr10 | 117984761 | 117985191 |
| chr10 | 117986073 | 117986233 |
| chr10 | 117987580 | 117988067 |
| chr10 | 117988067 | 117988576 |
| chr10 | 117990349 | 117990517 |
| chr10 | 117993875 | 117994213 |
| chr10 | 118012179 | 118012382 |
| chr10 | 118012382 | 118012581 |
| chr10 | 118034595 | 118034770 |

|       |           |           |
|-------|-----------|-----------|
| chr10 | 118038911 | 118039352 |
| chr10 | 118050347 | 118050499 |
| chr10 | 118058353 | 118058508 |
| chr10 | 118058931 | 118059240 |
| chr10 | 118103100 | 118103753 |
| chr10 | 118122571 | 118122867 |
| chr10 | 118122867 | 118123182 |
| chr10 | 118130985 | 118131166 |
| chr10 | 118141381 | 118141847 |
| chr10 | 118141847 | 118142210 |
| chr10 | 118178719 | 118179150 |
| chr10 | 118180961 | 118181462 |
| chr10 | 118195176 | 118195546 |
| chr10 | 118217190 | 118217364 |
| chr10 | 118302261 | 118302496 |
| chr10 | 118370480 | 118370807 |
| chr10 | 118470675 | 118470960 |
| chr10 | 118479372 | 118479717 |
| chr10 | 118518110 | 118518320 |
| chr10 | 118573369 | 118573574 |
| chr10 | 118628068 | 118628342 |
| chr10 | 118795110 | 118795302 |
| chr10 | 118804623 | 118804919 |
| chr10 | 118867970 | 118868295 |
| chr10 | 118868453 | 118868674 |
| chr10 | 118868674 | 118868947 |
| chr10 | 118868947 | 118869244 |
| chr10 | 118869244 | 118869624 |
| chr10 | 118869624 | 118870081 |
| chr10 | 118870299 | 118870603 |
| chr10 | 118981976 | 118982208 |
| chr10 | 118987994 | 118988342 |
| chr10 | 118988342 | 118988864 |
| chr10 | 118991239 | 118991589 |
| chr10 | 118993966 | 118994123 |
| chr10 | 118996358 | 118996629 |
| chr10 | 118999088 | 118999397 |
| chr10 | 119003835 | 119004172 |
| chr10 | 119010165 | 119010385 |
| chr10 | 119030644 | 119030982 |
| chr10 | 119050381 | 119050608 |
| chr10 | 119058574 | 119058775 |

|       |           |           |
|-------|-----------|-----------|
| chr10 | 119079385 | 119079585 |
| chr10 | 119079948 | 119080108 |
| chr10 | 119080587 | 119080789 |
| chr10 | 119081024 | 119081292 |
| chr10 | 119088006 | 119088179 |
| chr10 | 119091404 | 119091652 |
| chr10 | 119109282 | 119109518 |
| chr10 | 119111580 | 119111763 |
| chr10 | 119111763 | 119111993 |
| chr10 | 119111993 | 119112258 |
| chr10 | 119138060 | 119138286 |
| chr10 | 119144962 | 119145233 |
| chr10 | 119154940 | 119155214 |
| chr10 | 119229576 | 119229736 |
| chr10 | 119230095 | 119230354 |
| chr10 | 119239255 | 119239678 |
| chr10 | 119239678 | 119239937 |
| chr10 | 119239937 | 119240141 |
| chr10 | 119240141 | 119240392 |
| chr10 | 119240392 | 119240731 |
| chr10 | 119367308 | 119367460 |
| chr10 | 119367485 | 119367813 |
| chr10 | 119368429 | 119368898 |
| chr10 | 119408378 | 119408608 |
| chr10 | 119421442 | 119421769 |
| chr10 | 119453445 | 119453831 |
| chr10 | 119453831 | 119454101 |
| chr10 | 119454101 | 119454604 |
| chr10 | 119454771 | 119454935 |
| chr10 | 119454935 | 119455089 |
| chr10 | 119550481 | 119550728 |
| chr10 | 119572867 | 119573053 |
| chr10 | 119573203 | 119573378 |
| chr10 | 119591349 | 119591511 |
| chr10 | 119610335 | 119610597 |
| chr10 | 119610597 | 119610825 |
| chr10 | 119615235 | 119615641 |
| chr10 | 119667057 | 119667248 |
| chr10 | 119670506 | 119670868 |
| chr10 | 119670868 | 119671336 |
| chr10 | 119674178 | 119674334 |
| chr10 | 119697411 | 119697701 |

|       |           |           |
|-------|-----------|-----------|
| chr10 | 119702205 | 119702360 |
| chr10 | 119706362 | 119706564 |
| chr10 | 119713640 | 119714098 |
| chr10 | 119727057 | 119727246 |
| chr10 | 119727521 | 119727708 |
| chr10 | 119752065 | 119752395 |
| chr10 | 119752395 | 119752914 |
| chr10 | 119757290 | 119757688 |
| chr10 | 119757772 | 119757926 |
| chr10 | 119785292 | 119785462 |
| chr10 | 119803666 | 119803953 |
| chr10 | 119803953 | 119804231 |
| chr10 | 119805174 | 119805544 |
| chr10 | 119819244 | 119819641 |
| chr10 | 119850937 | 119851107 |
| chr10 | 119869033 | 119869338 |
| chr10 | 119875866 | 119876070 |
| chr10 | 119876409 | 119876715 |
| chr10 | 119876715 | 119877238 |
| chr10 | 119886837 | 119887147 |
| chr10 | 119974316 | 119974473 |
| chr10 | 119992475 | 119992644 |
| chr10 | 120020742 | 120021434 |
| chr10 | 120023770 | 120023973 |
| chr10 | 120050774 | 120051008 |
| chr10 | 120060636 | 120060899 |
| chr10 | 120060940 | 120061204 |
| chr10 | 120061204 | 120061448 |
| chr10 | 120061448 | 120061784 |
| chr10 | 120061792 | 120061988 |
| chr10 | 120063234 | 120063394 |
| chr10 | 120077960 | 120078110 |
| chr10 | 120095280 | 120095435 |
| chr10 | 120100896 | 120101051 |
| chr10 | 120112435 | 120112799 |
| chr10 | 120112799 | 120113362 |
| chr10 | 120120573 | 120120824 |
| chr10 | 120123877 | 120124073 |
| chr10 | 120125201 | 120125455 |
| chr10 | 120127915 | 120128071 |
| chr10 | 120130711 | 120130934 |
| chr10 | 120133552 | 120133713 |

|       |           |           |
|-------|-----------|-----------|
| chr10 | 120151754 | 120151910 |
| chr10 | 120168192 | 120168460 |
| chr10 | 120182972 | 120183188 |
| chr10 | 120188495 | 120188882 |
| chr10 | 120201249 | 120201477 |
| chr10 | 120201477 | 120201887 |
| chr10 | 120202206 | 120202427 |
| chr10 | 120204551 | 120205035 |
| chr10 | 120208570 | 120209056 |
| chr10 | 120209184 | 120209418 |
| chr10 | 120209633 | 120209788 |
| chr10 | 120216759 | 120217375 |
| chr10 | 120218877 | 120219501 |
| chr10 | 120226727 | 120227152 |
| chr10 | 120227152 | 120227391 |
| chr10 | 120227391 | 120227654 |
| chr10 | 120227654 | 120228008 |
| chr10 | 120231873 | 120232032 |
| chr10 | 120234086 | 120234295 |
| chr10 | 120243112 | 120243294 |
| chr10 | 120247441 | 120247721 |
| chr10 | 120255863 | 120256073 |
| chr10 | 120257319 | 120257626 |
| chr10 | 120260485 | 120260722 |
| chr10 | 120270902 | 120271071 |
| chr10 | 120298400 | 120298681 |
| chr10 | 120299881 | 120300097 |
| chr10 | 120300315 | 120300497 |
| chr10 | 120308338 | 120308558 |
| chr10 | 120308696 | 120309104 |
| chr10 | 120309798 | 120310110 |
| chr10 | 120314362 | 120314569 |
| chr10 | 120349918 | 120350221 |
| chr10 | 120354569 | 120354816 |
| chr10 | 120354928 | 120355131 |
| chr10 | 120355829 | 120356020 |
| chr10 | 120357063 | 120357244 |
| chr10 | 120357504 | 120357845 |
| chr10 | 120358235 | 120358739 |
| chr10 | 120359260 | 120359566 |
| chr10 | 120365672 | 120365842 |
| chr10 | 120366169 | 120366575 |

|       |           |           |
|-------|-----------|-----------|
| chr10 | 120371270 | 120371506 |
| chr10 | 120375477 | 120375770 |
| chr10 | 120377244 | 120377519 |
| chr10 | 120377564 | 120377772 |
| chr10 | 120378819 | 120379054 |
| chr10 | 120383656 | 120384040 |
| chr10 | 120384749 | 120384926 |
| chr10 | 120385655 | 120385905 |
| chr10 | 120385905 | 120386125 |
| chr10 | 120389769 | 120389942 |
| chr10 | 120390973 | 120391177 |
| chr10 | 120392390 | 120392664 |
| chr10 | 120393774 | 120393930 |
| chr10 | 120394708 | 120395068 |
| chr10 | 120399808 | 120400170 |
| chr10 | 120401877 | 120402194 |
| chr10 | 120403015 | 120403346 |
| chr10 | 120409630 | 120409803 |
| chr10 | 120410742 | 120410938 |
| chr10 | 120413774 | 120413979 |
| chr10 | 120413979 | 120414193 |
| chr10 | 120421973 | 120422525 |
| chr10 | 120422561 | 120423210 |
| chr10 | 120424106 | 120424410 |
| chr10 | 120428680 | 120428908 |
| chr10 | 120428908 | 120429181 |
| chr10 | 120429249 | 120429476 |
| chr10 | 120431537 | 120431711 |
| chr10 | 120432312 | 120432470 |
| chr10 | 120432860 | 120433141 |
| chr10 | 120433209 | 120433439 |
| chr10 | 120433439 | 120433641 |
| chr10 | 120436401 | 120436612 |
| chr10 | 120442587 | 120442772 |
| chr10 | 120443903 | 120444187 |
| chr10 | 120444822 | 120445130 |
| chr10 | 120451014 | 120451312 |
| chr10 | 120451466 | 120451660 |
| chr10 | 120452840 | 120453134 |
| chr10 | 120457090 | 120457245 |
| chr10 | 120459854 | 120460004 |
| chr10 | 120460781 | 120461183 |

|       |           |           |
|-------|-----------|-----------|
| chr10 | 120461329 | 120461642 |
| chr10 | 120461875 | 120462162 |
| chr10 | 120463194 | 120463462 |
| chr10 | 120464497 | 120464675 |
| chr10 | 120465155 | 120465403 |
| chr10 | 120469065 | 120469540 |
| chr10 | 120469572 | 120469871 |
| chr10 | 120475687 | 120476093 |
| chr10 | 120476093 | 120476599 |
| chr10 | 120476599 | 120477038 |
| chr10 | 120477038 | 120477421 |
| chr10 | 120477646 | 120477853 |
| chr10 | 120478210 | 120478360 |
| chr10 | 120495673 | 120495823 |
| chr10 | 120496977 | 120497169 |
| chr10 | 120525341 | 120525841 |
| chr10 | 120525841 | 120526171 |
| chr10 | 120527064 | 120527341 |
| chr10 | 120552357 | 120552670 |
| chr10 | 120552687 | 120553131 |
| chr10 | 120553131 | 120553493 |
| chr10 | 120557888 | 120558231 |
| chr10 | 120558231 | 120558614 |
| chr10 | 120558614 | 120558861 |
| chr10 | 120558861 | 120559046 |
| chr10 | 120559046 | 120559316 |
| chr10 | 120559352 | 120559524 |
| chr10 | 120576921 | 120577390 |
| chr10 | 120582381 | 120582816 |
| chr10 | 120582816 | 120583110 |
| chr10 | 120584601 | 120584869 |
| chr10 | 120584869 | 120585058 |
| chr10 | 120586473 | 120586674 |
| chr10 | 120596547 | 120596762 |
| chr10 | 120602635 | 120602797 |
| chr10 | 120602820 | 120603509 |
| chr10 | 120606258 | 120606564 |
| chr10 | 120609685 | 120610019 |
| chr10 | 120610019 | 120610470 |
| chr10 | 120616185 | 120616593 |
| chr10 | 120616593 | 120616980 |
| chr10 | 120616980 | 120617233 |

|       |           |           |
|-------|-----------|-----------|
| chr10 | 120623965 | 120624630 |
| chr10 | 120627964 | 120628571 |
| chr10 | 120632130 | 120632272 |
| chr10 | 120632272 | 120632444 |
| chr10 | 120635725 | 120636102 |
| chr10 | 120636102 | 120636575 |
| chr10 | 120646316 | 120646477 |
| chr10 | 120650512 | 120650674 |
| chr10 | 120653506 | 120653675 |
| chr10 | 120665662 | 120665957 |
| chr10 | 120666385 | 120666786 |
| chr10 | 120666786 | 120667030 |
| chr10 | 120667030 | 120667312 |
| chr10 | 120691513 | 120691749 |
| chr10 | 120691749 | 120692014 |
| chr10 | 120692014 | 120692382 |
| chr10 | 120696573 | 120696865 |
| chr10 | 120701532 | 120701730 |
| chr10 | 120701856 | 120702265 |
| chr10 | 120712003 | 120712211 |
| chr10 | 120716521 | 120716698 |
| chr10 | 120717026 | 120717814 |
| chr10 | 120720139 | 120720290 |
| chr10 | 120722528 | 120722806 |
| chr10 | 120765180 | 120765466 |
| chr10 | 120765466 | 120765681 |
| chr10 | 120777526 | 120777907 |
| chr10 | 120799598 | 120799772 |
| chr10 | 120807796 | 120808038 |
| chr10 | 120809094 | 120809252 |
| chr10 | 120810172 | 120810414 |
| chr10 | 120810414 | 120810671 |
| chr10 | 120840867 | 120841051 |
| chr10 | 120841051 | 120841256 |
| chr10 | 120847296 | 120847547 |
| chr10 | 120857801 | 120857988 |
| chr10 | 120861661 | 120862032 |
| chr10 | 120864520 | 120864786 |
| chr10 | 120872492 | 120872680 |
| chr10 | 120873636 | 120873862 |
| chr10 | 120873862 | 120874161 |
| chr10 | 120875743 | 120876014 |



|       |           |           |
|-------|-----------|-----------|
| chr10 | 120876046 | 120876198 |
| chr10 | 120876227 | 120876495 |
| chr10 | 120876495 | 120876701 |
| chr10 | 120876968 | 120877198 |
| chr10 | 120895769 | 120896095 |
| chr10 | 120896095 | 120896278 |
| chr10 | 120898326 | 120898799 |
| chr10 | 120898799 | 120899479 |
| chr10 | 120903964 | 120904183 |
| chr10 | 120912078 | 120912269 |
| chr10 | 120921632 | 120921792 |
| chr10 | 120961668 | 120961833 |
| chr10 | 120976987 | 120977303 |
| chr10 | 120978209 | 120978531 |
| chr10 | 120978740 | 120978998 |
| chr10 | 120978998 | 120979207 |
| chr10 | 120979220 | 120979757 |
| chr10 | 120990838 | 120991041 |
| chr10 | 120996967 | 120997333 |
| chr10 | 120997665 | 120997825 |
| chr10 | 121016512 | 121016762 |
| chr10 | 121033167 | 121033396 |
| chr10 | 121033396 | 121033690 |
| chr10 | 121033810 | 121034080 |
| chr10 | 121034080 | 121034296 |
| chr10 | 121034296 | 121034525 |
| chr10 | 121055507 | 121055809 |
| chr10 | 121057019 | 121057282 |
| chr10 | 121059475 | 121059625 |
| chr10 | 121122532 | 121122682 |
| chr10 | 121136200 | 121136420 |
| chr10 | 121142900 | 121143100 |
| chr10 | 121173937 | 121174361 |
| chr10 | 121252871 | 121253056 |
| chr10 | 121256511 | 121256765 |
| chr10 | 121259979 | 121260230 |
| chr10 | 121293944 | 121294533 |
| chr10 | 121309212 | 121309680 |
| chr10 | 121309816 | 121310230 |
| chr10 | 121310230 | 121310517 |
| chr10 | 121310517 | 121310737 |
| chr10 | 121310737 | 121310943 |

|       |           |           |
|-------|-----------|-----------|
| chr10 | 121310943 | 121311205 |
| chr10 | 121321660 | 121321865 |
| chr10 | 121331058 | 121331262 |
| chr10 | 121334649 | 121334945 |
| chr10 | 121350612 | 121351022 |
| chr10 | 121351022 | 121351314 |
| chr10 | 121351314 | 121351623 |
| chr10 | 121364737 | 121365181 |
| chr10 | 121365181 | 121365412 |
| chr10 | 121365412 | 121365696 |
| chr10 | 121365750 | 121366027 |
| chr10 | 121376039 | 121376549 |
| chr10 | 121376549 | 121376894 |
| chr10 | 121376894 | 121377305 |
| chr10 | 121389484 | 121389829 |
| chr10 | 121390782 | 121390944 |
| chr10 | 121395966 | 121396116 |
| chr10 | 121403328 | 121403550 |
| chr10 | 121409387 | 121409537 |
| chr10 | 121409787 | 121410053 |
| chr10 | 121419822 | 121420088 |
| chr10 | 121420088 | 121420629 |
| chr10 | 121421100 | 121421310 |
| chr10 | 121422374 | 121422555 |
| chr10 | 121425872 | 121426059 |
| chr10 | 121426608 | 121427107 |
| chr10 | 121427107 | 121427456 |
| chr10 | 121427543 | 121427745 |
| chr10 | 121428545 | 121428720 |
| chr10 | 121429134 | 121429410 |
| chr10 | 121433032 | 121433347 |
| chr10 | 121435688 | 121435881 |
| chr10 | 121436214 | 121436477 |
| chr10 | 121436849 | 121437057 |
| chr10 | 121439225 | 121439440 |
| chr10 | 121443645 | 121444489 |
| chr10 | 121454753 | 121455151 |
| chr10 | 121455151 | 121455510 |
| chr10 | 121455510 | 121455832 |
| chr10 | 121461378 | 121461868 |
| chr10 | 121461868 | 121462111 |
| chr10 | 121462111 | 121462301 |

|       |           |           |
|-------|-----------|-----------|
| chr10 | 121465021 | 121465445 |
| chr10 | 121474050 | 121474290 |
| chr10 | 121475499 | 121475742 |
| chr10 | 121475742 | 121476073 |
| chr10 | 121476073 | 121476399 |
| chr10 | 121476399 | 121476667 |
| chr10 | 121483541 | 121484002 |
| chr10 | 121493380 | 121493719 |
| chr10 | 121496793 | 121496943 |
| chr10 | 121498525 | 121498675 |
| chr10 | 121499065 | 121499328 |
| chr10 | 121500046 | 121500430 |
| chr10 | 121505077 | 121505636 |
| chr10 | 121505675 | 121505832 |
| chr10 | 121509833 | 121510057 |
| chr10 | 121510142 | 121510389 |
| chr10 | 121510389 | 121510664 |
| chr10 | 121515264 | 121515415 |
| chr10 | 121516280 | 121516569 |
| chr10 | 121520838 | 121521678 |
| chr10 | 121533244 | 121533465 |
| chr10 | 121536203 | 121536512 |
| chr10 | 121542246 | 121542497 |
| chr10 | 121556290 | 121556574 |
| chr10 | 121576664 | 121577073 |
| chr10 | 121577073 | 121577371 |
| chr10 | 121577371 | 121577632 |
| chr10 | 121578791 | 121579241 |
| chr10 | 121579254 | 121579622 |
| chr10 | 121579622 | 121579957 |
| chr10 | 121579957 | 121580252 |
| chr10 | 121586034 | 121586346 |
| chr10 | 121586346 | 121586666 |
| chr10 | 121586666 | 121587120 |
| chr10 | 121587140 | 121587342 |
| chr10 | 121604981 | 121605281 |
| chr10 | 121615275 | 121615666 |
| chr10 | 121620764 | 121620946 |
| chr10 | 121620990 | 121621445 |
| chr10 | 121625836 | 121626235 |
| chr10 | 121626235 | 121626887 |
| chr10 | 121640011 | 121640240 |

|       |           |           |
|-------|-----------|-----------|
| chr10 | 121640294 | 121640444 |
| chr10 | 121640462 | 121640758 |
| chr10 | 121641519 | 121641793 |
| chr10 | 121641793 | 121642177 |
| chr10 | 121642262 | 121642520 |
| chr10 | 121689097 | 121689257 |
| chr10 | 121689628 | 121689907 |
| chr10 | 121689907 | 121690213 |
| chr10 | 121701389 | 121701549 |
| chr10 | 121705807 | 121706052 |
| chr10 | 121725084 | 121725244 |
| chr10 | 121727274 | 121727436 |
| chr10 | 121730652 | 121730869 |
| chr10 | 121739520 | 121740132 |
| chr10 | 121740132 | 121740507 |
| chr10 | 121763150 | 121763323 |
| chr10 | 121770629 | 121770893 |
| chr10 | 121770895 | 121771213 |
| chr10 | 121771261 | 121771411 |
| chr10 | 121787218 | 121787437 |
| chr10 | 121788615 | 121788865 |
| chr10 | 121788865 | 121789138 |
| chr10 | 121796046 | 121796408 |
| chr10 | 121796408 | 121796899 |
| chr10 | 121802324 | 121802774 |
| chr10 | 121821301 | 121821497 |
| chr10 | 121822310 | 121822637 |
| chr10 | 121822637 | 121823227 |
| chr10 | 121856116 | 121856483 |
| chr10 | 121890149 | 121890315 |
| chr10 | 121902861 | 121903028 |
| chr10 | 121903780 | 121904773 |
| chr10 | 121918675 | 121918993 |
| chr10 | 121961201 | 121961425 |
| chr10 | 121961525 | 121961856 |
| chr10 | 121962130 | 121962541 |
| chr10 | 121968965 | 121969184 |
| chr10 | 121972249 | 121972675 |
| chr10 | 121979271 | 121979588 |
| chr10 | 121979588 | 121979818 |
| chr10 | 121994280 | 121994452 |
| chr10 | 122038635 | 122038884 |

|       |           |           |
|-------|-----------|-----------|
| chr10 | 122043317 | 122043571 |
| chr10 | 122045904 | 122046179 |
| chr10 | 122046779 | 122047169 |
| chr10 | 122047169 | 122047649 |
| chr10 | 122047649 | 122048142 |
| chr10 | 122051874 | 122052164 |
| chr10 | 122054628 | 122054858 |
| chr10 | 122096540 | 122096782 |
| chr10 | 122096782 | 122097086 |
| chr10 | 122097086 | 122097794 |
| chr10 | 122138119 | 122138269 |
| chr10 | 122145727 | 122145973 |
| chr10 | 122167498 | 122167766 |
| chr10 | 122167766 | 122168104 |
| chr10 | 122172696 | 122172936 |
| chr10 | 122273790 | 122274185 |
| chr10 | 122274298 | 122274465 |
| chr10 | 122274926 | 122275222 |
| chr10 | 122275222 | 122275488 |
| chr10 | 122275569 | 122275772 |
| chr10 | 122276776 | 122277014 |
| chr10 | 122289622 | 122289815 |
| chr10 | 122308778 | 122309014 |
| chr10 | 122340789 | 122340939 |
| chr10 | 122408829 | 122409004 |
| chr10 | 122409081 | 122409327 |
| chr10 | 122448887 | 122449104 |
| chr10 | 122489602 | 122489814 |
| chr10 | 122522740 | 122522998 |
| chr10 | 122529459 | 122529609 |
| chr10 | 122544228 | 122544378 |
| chr10 | 122551656 | 122551884 |
| chr10 | 122553140 | 122553412 |
| chr10 | 122553913 | 122554156 |
| chr10 | 122678498 | 122678883 |
| chr10 | 122678883 | 122679201 |
| chr10 | 122679201 | 122679715 |
| chr10 | 122762765 | 122763043 |
| chr10 | 122777022 | 122777324 |
| chr10 | 122777482 | 122777900 |
| chr10 | 122777900 | 122778260 |
| chr10 | 122786078 | 122786238 |

|       |           |           |
|-------|-----------|-----------|
| chr10 | 122792810 | 122792966 |
| chr10 | 122794375 | 122794618 |
| chr10 | 122794618 | 122794995 |
| chr10 | 122798000 | 122798227 |
| chr10 | 122803970 | 122804233 |
| chr10 | 122804602 | 122804752 |
| chr10 | 122807128 | 122807401 |
| chr10 | 122807401 | 122807703 |
| chr10 | 122815115 | 122815457 |
| chr10 | 122828165 | 122828510 |
| chr10 | 122854142 | 122854494 |
| chr10 | 122860474 | 122860670 |
| chr10 | 122866631 | 122866783 |
| chr10 | 122870101 | 122870416 |
| chr10 | 122870416 | 122870655 |
| chr10 | 122886138 | 122886483 |
| chr10 | 122886483 | 122886928 |
| chr10 | 122891438 | 122891906 |
| chr10 | 122893436 | 122893856 |
| chr10 | 122894734 | 122895101 |
| chr10 | 122895170 | 122895339 |
| chr10 | 122895539 | 122895764 |
| chr10 | 122912854 | 122913234 |
| chr10 | 122928742 | 122929063 |
| chr10 | 122966343 | 122966915 |
| chr10 | 122969802 | 122969962 |
| chr10 | 122970048 | 122970215 |
| chr10 | 122982956 | 122983223 |
| chr10 | 122985238 | 122985443 |
| chr10 | 122985534 | 122985983 |
| chr10 | 122985983 | 122986284 |
| chr10 | 122986284 | 122986641 |
| chr10 | 122987759 | 122987988 |
| chr10 | 123004567 | 123004720 |
| chr10 | 123004980 | 123005228 |
| chr10 | 123005302 | 123005530 |
| chr10 | 123005555 | 123005747 |
| chr10 | 123011292 | 123011697 |
| chr10 | 123011697 | 123012106 |
| chr10 | 123045229 | 123045412 |
| chr10 | 123075751 | 123076018 |
| chr10 | 123076018 | 123076288 |

|       |           |           |
|-------|-----------|-----------|
| chr10 | 123076288 | 123076606 |
| chr10 | 123076606 | 123076850 |
| chr10 | 123091828 | 123092107 |
| chr10 | 123110685 | 123110835 |
| chr10 | 123121106 | 123121315 |
| chr10 | 123175866 | 123176081 |
| chr10 | 123183316 | 123183558 |
| chr10 | 123186287 | 123186441 |
| chr10 | 123196036 | 123196218 |
| chr10 | 123196265 | 123196640 |
| chr10 | 123196640 | 123196846 |
| chr10 | 123196846 | 123197133 |
| chr10 | 123197133 | 123197399 |
| chr10 | 123197399 | 123197620 |
| chr10 | 123215818 | 123216021 |
| chr10 | 123232697 | 123232942 |
| chr10 | 123256041 | 123256210 |
| chr10 | 123263908 | 123264244 |
| chr10 | 123264449 | 123264731 |
| chr10 | 123264731 | 123265219 |
| chr10 | 123265301 | 123265615 |
| chr10 | 123268693 | 123268943 |
| chr10 | 123341344 | 123341606 |
| chr10 | 123348883 | 123349190 |
| chr10 | 123420394 | 123420549 |
| chr10 | 123516489 | 123516639 |
| chr10 | 123536097 | 123536456 |
| chr10 | 123566796 | 123567147 |
| chr10 | 123716681 | 123716963 |
| chr10 | 123818238 | 123818448 |
| chr10 | 124087346 | 124087581 |
| chr10 | 124138468 | 124138863 |
| chr10 | 124143258 | 124143538 |
| chr10 | 124168017 | 124168260 |
| chr10 | 124214141 | 124214299 |
| chr10 | 124288411 | 124288584 |
| chr10 | 124370958 | 124371246 |
| chr10 | 124372247 | 124372440 |
| chr10 | 124606811 | 124606982 |
| chr10 | 124845287 | 124845494 |
| chr10 | 124853087 | 124853239 |
| chr10 | 124853856 | 124854147 |

|       |           |           |
|-------|-----------|-----------|
| chr10 | 124913296 | 124913446 |
| chr10 | 125109078 | 125109252 |
| chr10 | 125171207 | 125171479 |
| chr10 | 125507481 | 125507685 |
| chr10 | 125663128 | 125663278 |
| chr10 | 125680254 | 125680455 |
| chr10 | 125692256 | 125692486 |
| chr10 | 125725414 | 125725609 |
| chr10 | 125854999 | 125855196 |
| chr10 | 125855701 | 125855871 |
| chr10 | 125903480 | 125903677 |
| chr10 | 125904166 | 125904416 |
| chr10 | 125917439 | 125917772 |
| chr10 | 125938537 | 125938775 |
| chr10 | 125938775 | 125939057 |
| chr10 | 125961880 | 125962086 |
| chr10 | 125965867 | 125966277 |
| chr10 | 125966277 | 125966491 |
| chr10 | 125966491 | 125966695 |
| chr10 | 125966695 | 125966934 |
| chr10 | 125994925 | 125995159 |
| chr10 | 126262484 | 126262704 |
| chr10 | 126266715 | 126266873 |
| chr10 | 126298323 | 126298500 |
| chr10 | 126330699 | 126330864 |
| chr10 | 126681010 | 126681343 |
| chr10 | 126746500 | 126746650 |
| chr10 | 126821471 | 126821723 |
| chr10 | 126833108 | 126833327 |
| chr10 | 126840348 | 126840568 |
| chr10 | 126849420 | 126849684 |
| chr10 | 126863593 | 126863870 |
| chr10 | 126869728 | 126869988 |
| chr10 | 126900737 | 126901171 |
| chr10 | 126901171 | 126901573 |
| chr10 | 126901628 | 126901778 |
| chr10 | 126905606 | 126905857 |
| chr10 | 126905857 | 126906151 |
| chr10 | 126918913 | 126919150 |
| chr10 | 126919150 | 126919437 |
| chr10 | 126924118 | 126924561 |
| chr10 | 126928075 | 126928300 |



|       |           |           |
|-------|-----------|-----------|
| chr10 | 126928300 | 126928572 |
| chr10 | 126928572 | 126928905 |
| chr10 | 126935509 | 126935789 |
| chr10 | 126935789 | 126936139 |
| chr10 | 126936139 | 126936421 |
| chr10 | 126937393 | 126937649 |
| chr10 | 126947307 | 126947580 |
| chr10 | 126947659 | 126947948 |
| chr10 | 126948921 | 126949190 |
| chr10 | 126950656 | 126950855 |
| chr10 | 126953030 | 126953257 |
| chr10 | 126957803 | 126958155 |
| chr10 | 126962229 | 126962637 |
| chr10 | 126972132 | 126972337 |
| chr10 | 126978114 | 126978406 |
| chr10 | 126978406 | 126978725 |
| chr10 | 126978725 | 126979041 |
| chr10 | 126979041 | 126979320 |
| chr10 | 126979404 | 126979643 |
| chr10 | 126979795 | 126979984 |
| chr10 | 126980450 | 126980682 |
| chr10 | 126984320 | 126984494 |
| chr10 | 126984551 | 126984987 |
| chr10 | 126990201 | 126990709 |
| chr10 | 127002111 | 127002328 |
| chr10 | 127002796 | 127003328 |
| chr10 | 127003331 | 127003637 |
| chr10 | 127015836 | 127016044 |
| chr10 | 127016547 | 127016840 |
| chr10 | 127030274 | 127030627 |
| chr10 | 127030627 | 127031001 |
| chr10 | 127033124 | 127033301 |
| chr10 | 127040885 | 127041058 |
| chr10 | 127041307 | 127041700 |
| chr10 | 127041700 | 127042047 |
| chr10 | 127042047 | 127042342 |
| chr10 | 127042764 | 127043009 |
| chr10 | 127049419 | 127049815 |
| chr10 | 127049815 | 127050073 |
| chr10 | 127050073 | 127050274 |
| chr10 | 127058243 | 127058506 |
| chr10 | 127060186 | 127060541 |

|       |           |           |
|-------|-----------|-----------|
| chr10 | 127062573 | 127062822 |
| chr10 | 127063147 | 127063453 |
| chr10 | 127063453 | 127063925 |
| chr10 | 127068390 | 127068636 |
| chr10 | 127069313 | 127069547 |
| chr10 | 127069547 | 127069808 |
| chr10 | 127069808 | 127070110 |
| chr10 | 127070155 | 127070493 |
| chr10 | 127070690 | 127070915 |
| chr10 | 127078135 | 127078395 |
| chr10 | 127079678 | 127079950 |
| chr10 | 127082092 | 127082291 |
| chr10 | 127083973 | 127084208 |
| chr10 | 127088361 | 127088620 |
| chr10 | 127090881 | 127091131 |
| chr10 | 127091131 | 127091337 |
| chr10 | 127091355 | 127091521 |
| chr10 | 127091526 | 127091885 |
| chr10 | 127094300 | 127094832 |
| chr10 | 127094909 | 127095128 |
| chr10 | 127103040 | 127103456 |
| chr10 | 127114321 | 127114610 |
| chr10 | 127115122 | 127115429 |
| chr10 | 127120696 | 127120890 |
| chr10 | 127120986 | 127121468 |
| chr10 | 127122780 | 127123044 |
| chr10 | 127123622 | 127123784 |
| chr10 | 127125360 | 127125545 |
| chr10 | 127126787 | 127127150 |
| chr10 | 127129495 | 127129811 |
| chr10 | 127133238 | 127133528 |
| chr10 | 127134453 | 127134721 |
| chr10 | 127134721 | 127134972 |
| chr10 | 127144058 | 127144323 |
| chr10 | 127144323 | 127144584 |
| chr10 | 127144584 | 127144878 |
| chr10 | 127144878 | 127145148 |
| chr10 | 127145387 | 127145668 |
| chr10 | 127149790 | 127150122 |
| chr10 | 127150481 | 127150916 |
| chr10 | 127150916 | 127151185 |
| chr10 | 127151338 | 127151602 |

|       |           |           |
|-------|-----------|-----------|
| chr10 | 127162675 | 127163233 |
| chr10 | 127164976 | 127165371 |
| chr10 | 127165371 | 127165676 |
| chr10 | 127165676 | 127165885 |
| chr10 | 127165885 | 127166111 |
| chr10 | 127166138 | 127166523 |
| chr10 | 127167551 | 127167922 |
| chr10 | 127167922 | 127168233 |
| chr10 | 127170815 | 127171055 |
| chr10 | 127171055 | 127171309 |
| chr10 | 127177361 | 127177514 |
| chr10 | 127177514 | 127177741 |
| chr10 | 127177741 | 127178284 |
| chr10 | 127178388 | 127178538 |
| chr10 | 127180230 | 127180464 |
| chr10 | 127183824 | 127184100 |
| chr10 | 127188429 | 127188705 |
| chr10 | 127188705 | 127189210 |
| chr10 | 127189356 | 127189554 |
| chr10 | 127195108 | 127195369 |
| chr10 | 127195369 | 127195609 |
| chr10 | 127195609 | 127195845 |
| chr10 | 127195845 | 127196071 |
| chr10 | 127196410 | 127196686 |
| chr10 | 127200366 | 127200535 |
| chr10 | 127201008 | 127201206 |
| chr10 | 127210926 | 127211191 |
| chr10 | 127211191 | 127211492 |
| chr10 | 127211492 | 127211887 |
| chr10 | 127217287 | 127217495 |
| chr10 | 127218495 | 127218646 |
| chr10 | 127226555 | 127226828 |
| chr10 | 127228947 | 127229236 |
| chr10 | 127233244 | 127233470 |
| chr10 | 127242297 | 127242500 |
| chr10 | 127242896 | 127243128 |
| chr10 | 127244911 | 127245063 |
| chr10 | 127255884 | 127256139 |
| chr10 | 127256139 | 127256395 |
| chr10 | 127263036 | 127263222 |
| chr10 | 127265719 | 127265934 |
| chr10 | 127266117 | 127266613 |

|       |           |           |
|-------|-----------|-----------|
| chr10 | 127266615 | 127266908 |
| chr10 | 127266908 | 127267177 |
| chr10 | 127276106 | 127276278 |
| chr10 | 127277964 | 127278266 |
| chr10 | 127279861 | 127280023 |
| chr10 | 127288355 | 127288527 |
| chr10 | 127288570 | 127288826 |
| chr10 | 127288826 | 127289156 |
| chr10 | 127289156 | 127289664 |
| chr10 | 127289812 | 127290083 |
| chr10 | 127290227 | 127290519 |
| chr10 | 127290519 | 127290825 |
| chr10 | 127290825 | 127291080 |
| chr10 | 127291080 | 127291298 |
| chr10 | 127296444 | 127296612 |
| chr10 | 127297644 | 127297954 |
| chr10 | 127298619 | 127298945 |
| chr10 | 127300451 | 127300613 |
| chr10 | 127302956 | 127303192 |
| chr10 | 127305685 | 127305957 |
| chr10 | 127311117 | 127311515 |
| chr10 | 127311515 | 127311984 |
| chr10 | 127312149 | 127312344 |
| chr10 | 127312344 | 127312613 |
| chr10 | 127318171 | 127318331 |
| chr10 | 127318363 | 127318533 |
| chr10 | 127322847 | 127323037 |
| chr10 | 127324554 | 127324885 |
| chr10 | 127326377 | 127326631 |
| chr10 | 127327893 | 127328076 |
| chr10 | 127332273 | 127332432 |
| chr10 | 127333248 | 127333401 |
| chr10 | 127336966 | 127337241 |
| chr10 | 127338879 | 127339195 |
| chr10 | 127339216 | 127339576 |
| chr10 | 127339905 | 127340155 |
| chr10 | 127341782 | 127342136 |
| chr10 | 127342318 | 127342602 |
| chr10 | 127350620 | 127351018 |
| chr10 | 127353955 | 127354176 |
| chr10 | 127380015 | 127380727 |
| chr10 | 127380727 | 127380988 |

|       |           |           |
|-------|-----------|-----------|
| chr10 | 127380988 | 127381216 |
| chr10 | 127381216 | 127381467 |
| chr10 | 127391862 | 127392088 |
| chr10 | 127413682 | 127413995 |
| chr10 | 127414088 | 127414516 |
| chr10 | 127420756 | 127420934 |
| chr10 | 127425221 | 127425542 |
| chr10 | 127425872 | 127426053 |
| chr10 | 127430594 | 127430798 |
| chr10 | 127453888 | 127454085 |
| chr10 | 127479156 | 127479315 |
| chr10 | 127481208 | 127481487 |
| chr10 | 127481487 | 127481757 |
| chr10 | 127481757 | 127482004 |
| chr10 | 127485375 | 127485559 |
| chr10 | 127495268 | 127495506 |
| chr10 | 127496324 | 127496506 |
| chr10 | 127499960 | 127500174 |
| chr10 | 127500174 | 127500445 |
| chr10 | 127500458 | 127500733 |
| chr10 | 127500733 | 127500917 |
| chr10 | 127500943 | 127501266 |
| chr10 | 127501367 | 127501599 |
| chr10 | 127501599 | 127501765 |
| chr10 | 127508400 | 127508591 |
| chr10 | 127508999 | 127509286 |
| chr10 | 127509322 | 127509559 |
| chr10 | 127511630 | 127511784 |
| chr10 | 127511866 | 127512144 |
| chr10 | 127512144 | 127512458 |
| chr10 | 127512659 | 127513207 |
| chr10 | 127513592 | 127513779 |
| chr10 | 127515643 | 127515830 |
| chr10 | 127521504 | 127521721 |
| chr10 | 127521807 | 127522052 |
| chr10 | 127522052 | 127522274 |
| chr10 | 127522274 | 127522608 |
| chr10 | 127526695 | 127527035 |
| chr10 | 127527601 | 127527827 |
| chr10 | 127528514 | 127528719 |
| chr10 | 127534102 | 127534252 |
| chr10 | 127534297 | 127534794 |

|       |           |           |
|-------|-----------|-----------|
| chr10 | 127534794 | 127535156 |
| chr10 | 127535498 | 127535815 |
| chr10 | 127536726 | 127536887 |
| chr10 | 127537806 | 127538162 |
| chr10 | 127543975 | 127544257 |
| chr10 | 127546589 | 127546797 |
| chr10 | 127555706 | 127556246 |
| chr10 | 127557484 | 127557728 |
| chr10 | 127557872 | 127558156 |
| chr10 | 127558407 | 127558585 |
| chr10 | 127562610 | 127562786 |
| chr10 | 127562884 | 127563446 |
| chr10 | 127564365 | 127564536 |
| chr10 | 127569118 | 127569403 |
| chr10 | 127569478 | 127569806 |
| chr10 | 127570405 | 127570591 |
| chr10 | 127576286 | 127577004 |
| chr10 | 127583604 | 127584056 |
| chr10 | 127584543 | 127584698 |
| chr10 | 127586201 | 127586571 |
| chr10 | 127591459 | 127591867 |
| chr10 | 127592516 | 127592738 |
| chr10 | 127592771 | 127593025 |
| chr10 | 127596535 | 127597289 |
| chr10 | 127597304 | 127597598 |
| chr10 | 127604622 | 127604936 |
| chr10 | 127605313 | 127605538 |
| chr10 | 127607098 | 127607373 |
| chr10 | 127608071 | 127608266 |
| chr10 | 127608266 | 127608430 |
| chr10 | 127611431 | 127611677 |
| chr10 | 127616332 | 127616482 |
| chr10 | 127621121 | 127621639 |
| chr10 | 127621639 | 127622024 |
| chr10 | 127622024 | 127622367 |
| chr10 | 127631715 | 127632236 |
| chr10 | 127636060 | 127636210 |
| chr10 | 127636667 | 127636911 |
| chr10 | 127641812 | 127642280 |
| chr10 | 127642280 | 127642777 |
| chr10 | 127642777 | 127643340 |
| chr10 | 127643364 | 127643530 |

|       |           |           |
|-------|-----------|-----------|
| chr10 | 127643530 | 127643718 |
| chr10 | 127643718 | 127643936 |
| chr10 | 127643936 | 127644195 |
| chr10 | 127657795 | 127658129 |
| chr10 | 127658213 | 127658429 |
| chr10 | 127661923 | 127662160 |
| chr10 | 127662160 | 127662442 |
| chr10 | 127662473 | 127662668 |
| chr10 | 127666403 | 127666897 |
| chr10 | 127666897 | 127667164 |
| chr10 | 127667164 | 127667474 |
| chr10 | 127667474 | 127667745 |
| chr10 | 127667745 | 127668093 |
| chr10 | 127668093 | 127668478 |
| chr10 | 127674699 | 127675140 |
| chr10 | 127675140 | 127675355 |
| chr10 | 127676721 | 127677170 |
| chr10 | 127677170 | 127677491 |
| chr10 | 127678013 | 127678258 |
| chr10 | 127694813 | 127694968 |
| chr10 | 127703451 | 127703646 |
| chr10 | 127711339 | 127711492 |
| chr10 | 127713213 | 127713426 |
| chr10 | 127729097 | 127729306 |
| chr10 | 127736212 | 127736449 |
| chr10 | 127738170 | 127738330 |
| chr10 | 127738368 | 127738625 |
| chr10 | 127738625 | 127738953 |
| chr10 | 127739006 | 127739266 |
| chr10 | 127739266 | 127739670 |
| chr10 | 127739670 | 127740122 |
| chr10 | 127744599 | 127744837 |
| chr10 | 127744837 | 127745081 |
| chr10 | 127759484 | 127759774 |
| chr10 | 127763890 | 127764086 |
| chr10 | 127803101 | 127803251 |
| chr10 | 127825476 | 127825712 |
| chr10 | 127827990 | 127828284 |
| chr10 | 127872370 | 127872788 |
| chr10 | 127877667 | 127878069 |
| chr10 | 127878197 | 127878786 |
| chr10 | 127879213 | 127879465 |

|       |           |           |
|-------|-----------|-----------|
| chr10 | 127893615 | 127894079 |
| chr10 | 127899930 | 127900202 |
| chr10 | 127904445 | 127904595 |
| chr10 | 127904964 | 127905514 |
| chr10 | 127914706 | 127915001 |
| chr10 | 127922258 | 127922726 |
| chr10 | 127924640 | 127924992 |
| chr10 | 127924992 | 127925455 |
| chr10 | 127939744 | 127940062 |
| chr10 | 127945348 | 127945816 |
| chr10 | 127949834 | 127949995 |
| chr10 | 127955125 | 127955357 |
| chr10 | 127956164 | 127956479 |
| chr10 | 127956479 | 127956774 |
| chr10 | 127960897 | 127961178 |
| chr10 | 127968571 | 127968785 |
| chr10 | 128008273 | 128008597 |
| chr10 | 128008615 | 128008805 |
| chr10 | 128015013 | 128015284 |
| chr10 | 128015284 | 128015576 |
| chr10 | 128015576 | 128015836 |
| chr10 | 128035228 | 128035763 |
| chr10 | 128035769 | 128036030 |
| chr10 | 128036030 | 128036278 |
| chr10 | 128036819 | 128037115 |
| chr10 | 128039919 | 128040161 |
| chr10 | 128041075 | 128041301 |
| chr10 | 128046079 | 128046327 |
| chr10 | 128049813 | 128050080 |
| chr10 | 128050384 | 128050829 |
| chr10 | 128050995 | 128051150 |
| chr10 | 128058357 | 128058935 |
| chr10 | 128058935 | 128059517 |
| chr10 | 128059606 | 128059975 |
| chr10 | 128067698 | 128067909 |
| chr10 | 128070492 | 128070718 |
| chr10 | 128077849 | 128077999 |
| chr10 | 128082893 | 128083166 |
| chr10 | 128083166 | 128083384 |
| chr10 | 128083384 | 128083629 |
| chr10 | 128090981 | 128091292 |
| chr10 | 128091442 | 128091692 |



|       |           |           |
|-------|-----------|-----------|
| chr10 | 128091723 | 128091901 |
| chr10 | 128092554 | 128092856 |
| chr10 | 128092856 | 128093190 |
| chr10 | 128093190 | 128093481 |
| chr10 | 128093937 | 128094093 |
| chr10 | 128094645 | 128094949 |
| chr10 | 128096666 | 128096982 |
| chr10 | 128097177 | 128097363 |
| chr10 | 128114086 | 128114251 |
| chr10 | 128123346 | 128123568 |
| chr10 | 128124008 | 128124165 |
| chr10 | 128125908 | 128126058 |
| chr10 | 128127549 | 128127732 |
| chr10 | 128143610 | 128144290 |
| chr10 | 128149571 | 128150023 |
| chr10 | 128150713 | 128150945 |
| chr10 | 128150945 | 128151323 |
| chr10 | 128154006 | 128154272 |
| chr10 | 128166881 | 128167488 |
| chr10 | 128175558 | 128175819 |
| chr10 | 128175947 | 128176148 |
| chr10 | 128176148 | 128176453 |
| chr10 | 128176453 | 128176799 |
| chr10 | 128177403 | 128177677 |
| chr10 | 128184435 | 128184619 |
| chr10 | 128185440 | 128185949 |
| chr10 | 128185949 | 128186293 |
| chr10 | 128188599 | 128188816 |
| chr10 | 128193966 | 128194221 |
| chr10 | 128194221 | 128194503 |
| chr10 | 128194503 | 128194890 |
| chr10 | 128194890 | 128195257 |
| chr10 | 128195257 | 128195465 |
| chr10 | 128203520 | 128203905 |
| chr10 | 128205002 | 128205362 |
| chr10 | 128210967 | 128211327 |
| chr10 | 128211527 | 128212152 |
| chr10 | 128212806 | 128213079 |
| chr10 | 128213119 | 128213281 |
| chr10 | 128220953 | 128221215 |
| chr10 | 128221775 | 128221935 |
| chr10 | 128231727 | 128231882 |

|       |           |           |
|-------|-----------|-----------|
| chr10 | 128231888 | 128232193 |
| chr10 | 128232193 | 128232448 |
| chr10 | 128232448 | 128232702 |
| chr10 | 128232702 | 128233007 |
| chr10 | 128253735 | 128253980 |
| chr10 | 128253980 | 128254226 |
| chr10 | 128256008 | 128256310 |
| chr10 | 128256310 | 128256717 |
| chr10 | 128270179 | 128270610 |
| chr10 | 128270610 | 128270927 |
| chr10 | 128281805 | 128281995 |
| chr10 | 128283909 | 128284120 |
| chr10 | 128284120 | 128284451 |
| chr10 | 128297611 | 128298060 |
| chr10 | 128298060 | 128298450 |
| chr10 | 128303114 | 128303470 |
| chr10 | 128303470 | 128303795 |
| chr10 | 128303795 | 128304037 |
| chr10 | 128304037 | 128304234 |
| chr10 | 128309760 | 128309953 |
| chr10 | 128322145 | 128323148 |
| chr10 | 128327727 | 128327909 |
| chr10 | 128337254 | 128337501 |
| chr10 | 128337501 | 128337835 |
| chr10 | 128337835 | 128338348 |
| chr10 | 128338427 | 128338726 |
| chr10 | 128344305 | 128344455 |
| chr10 | 128344604 | 128345440 |
| chr10 | 128358849 | 128359134 |
| chr10 | 128362649 | 128362856 |
| chr10 | 128368256 | 128368838 |
| chr10 | 128368838 | 128369343 |
| chr10 | 128376380 | 128376602 |
| chr10 | 128376655 | 128376904 |
| chr10 | 128376904 | 128377169 |
| chr10 | 128377169 | 128377425 |
| chr10 | 128377425 | 128377666 |
| chr10 | 128382609 | 128382843 |
| chr10 | 128385837 | 128386030 |
| chr10 | 128387596 | 128387842 |
| chr10 | 128388535 | 128388697 |
| chr10 | 128394425 | 128394582 |

|       |           |           |
|-------|-----------|-----------|
| chr10 | 128395898 | 128396100 |
| chr10 | 128396326 | 128396481 |
| chr10 | 128396890 | 128397086 |
| chr10 | 128397086 | 128397261 |
| chr10 | 128397471 | 128397722 |
| chr10 | 128409674 | 128410080 |
| chr10 | 128411082 | 128411410 |
| chr10 | 128411410 | 128411767 |
| chr10 | 128411767 | 128412105 |
| chr10 | 128417438 | 128417663 |
| chr10 | 128418367 | 128418868 |
| chr10 | 128422530 | 128422745 |
| chr10 | 128434673 | 128435099 |
| chr10 | 128440498 | 128440738 |
| chr10 | 128445748 | 128445910 |
| chr10 | 128449022 | 128449218 |
| chr10 | 128451077 | 128451227 |
| chr10 | 128455385 | 128455569 |
| chr10 | 128458313 | 128458891 |
| chr10 | 128458891 | 128459341 |
| chr10 | 128459341 | 128459986 |
| chr10 | 128491556 | 128491707 |
| chr10 | 128492897 | 128493171 |
| chr10 | 128493377 | 128493731 |
| chr10 | 128493731 | 128494091 |
| chr10 | 128494151 | 128494498 |
| chr10 | 128498599 | 128499068 |
| chr10 | 128499107 | 128499297 |
| chr10 | 128499310 | 128499460 |
| chr10 | 128504744 | 128504958 |
| chr10 | 128504969 | 128505253 |
| chr10 | 128509413 | 128509568 |
| chr10 | 128515136 | 128515367 |
| chr10 | 128516734 | 128516987 |
| chr10 | 128518901 | 128519202 |
| chr10 | 128524786 | 128525077 |
| chr10 | 128525085 | 128525417 |
| chr10 | 128525417 | 128525792 |
| chr10 | 128525792 | 128526298 |
| chr10 | 128536106 | 128536335 |
| chr10 | 128536335 | 128536681 |
| chr10 | 128536681 | 128537010 |

|       |           |           |
|-------|-----------|-----------|
| chr10 | 128537713 | 128537998 |
| chr10 | 128545655 | 128545831 |
| chr10 | 128546377 | 128546533 |
| chr10 | 128547204 | 128547667 |
| chr10 | 128547667 | 128548098 |
| chr10 | 128548936 | 128549491 |
| chr10 | 128555876 | 128556083 |
| chr10 | 128556330 | 128556775 |
| chr10 | 128557097 | 128557251 |
| chr10 | 128557572 | 128557738 |
| chr10 | 128565268 | 128565448 |
| chr10 | 128565448 | 128565656 |
| chr10 | 128565812 | 128566216 |
| chr10 | 128566216 | 128566620 |
| chr10 | 128568156 | 128568340 |
| chr10 | 128575150 | 128575389 |
| chr10 | 128583674 | 128584044 |
| chr10 | 128584127 | 128584447 |
| chr10 | 128584447 | 128584787 |
| chr10 | 128588820 | 128589007 |
| chr10 | 128589149 | 128589344 |
| chr10 | 128589344 | 128589582 |
| chr10 | 128589582 | 128589840 |
| chr10 | 128589840 | 128590098 |
| chr10 | 128590240 | 128590484 |
| chr10 | 128590484 | 128590715 |
| chr10 | 128599281 | 128599604 |
| chr10 | 128606479 | 128606893 |
| chr10 | 128612695 | 128612971 |
| chr10 | 128612971 | 128613174 |
| chr10 | 128613174 | 128613537 |
| chr10 | 128622108 | 128622301 |
| chr10 | 128625964 | 128626157 |
| chr10 | 128626195 | 128626557 |
| chr10 | 128626687 | 128626964 |
| chr10 | 128626964 | 128627185 |
| chr10 | 128631752 | 128631912 |
| chr10 | 128636530 | 128636713 |
| chr10 | 128641872 | 128642388 |
| chr10 | 128645727 | 128646048 |
| chr10 | 128646272 | 128646424 |
| chr10 | 128655414 | 128655569 |

|       |           |           |
|-------|-----------|-----------|
| chr10 | 128659117 | 128659279 |
| chr10 | 128665410 | 128665622 |
| chr10 | 128665819 | 128666163 |
| chr10 | 128668870 | 128669128 |
| chr10 | 128672259 | 128672422 |
| chr10 | 128673526 | 128673798 |
| chr10 | 128673798 | 128674060 |
| chr10 | 128674060 | 128674451 |
| chr10 | 128695723 | 128695958 |
| chr10 | 128695958 | 128696244 |
| chr10 | 128696244 | 128696771 |
| chr10 | 128704313 | 128704713 |
| chr10 | 128704713 | 128704972 |
| chr10 | 128704972 | 128705298 |
| chr10 | 128716090 | 128716285 |
| chr10 | 128716298 | 128716518 |
| chr10 | 128722011 | 128722237 |
| chr10 | 128722751 | 128722956 |
| chr10 | 128730957 | 128731386 |
| chr10 | 128731791 | 128732110 |
| chr10 | 128732110 | 128732339 |
| chr10 | 128737457 | 128737792 |
| chr10 | 128742702 | 128742895 |
| chr10 | 128743771 | 128743952 |
| chr10 | 128743952 | 128744156 |
| chr10 | 128747511 | 128748121 |
| chr10 | 128748121 | 128748651 |
| chr10 | 128757435 | 128757590 |
| chr10 | 128763686 | 128763862 |
| chr10 | 128773036 | 128773204 |
| chr10 | 128773616 | 128774018 |
| chr10 | 128779441 | 128779886 |
| chr10 | 128780267 | 128780674 |
| chr10 | 128786832 | 128787109 |
| chr10 | 128787109 | 128787351 |
| chr10 | 128787602 | 128787796 |
| chr10 | 128792131 | 128792342 |
| chr10 | 128795198 | 128795392 |
| chr10 | 128803837 | 128804257 |
| chr10 | 128804257 | 128804604 |
| chr10 | 128804837 | 128805215 |
| chr10 | 128805215 | 128805521 |

|       |           |           |
|-------|-----------|-----------|
| chr10 | 128805521 | 128805851 |
| chr10 | 128821329 | 128821754 |
| chr10 | 128821754 | 128822068 |
| chr10 | 128822232 | 128822402 |
| chr10 | 128878379 | 128878533 |
| chr10 | 128890642 | 128890827 |
| chr10 | 128890827 | 128891002 |
| chr10 | 128891033 | 128891555 |
| chr10 | 128891555 | 128891794 |
| chr10 | 128891794 | 128892068 |
| chr10 | 128895512 | 128895769 |
| chr10 | 128900652 | 128901037 |
| chr10 | 128901504 | 128901659 |
| chr10 | 128903437 | 128903742 |
| chr10 | 128909385 | 128909995 |
| chr10 | 128909995 | 128910296 |
| chr10 | 128910296 | 128910602 |
| chr10 | 128910602 | 128910909 |
| chr10 | 128911043 | 128911260 |
| chr10 | 128913277 | 128913568 |
| chr10 | 128921854 | 128922191 |
| chr10 | 128922933 | 128923318 |
| chr10 | 128923318 | 128923718 |
| chr10 | 128928575 | 128928696 |
| chr10 | 128928696 | 128928769 |
| chr10 | 128931571 | 128931786 |
| chr10 | 128933558 | 128933986 |
| chr10 | 128933986 | 128934334 |
| chr10 | 128939068 | 128939265 |
| chr10 | 128945732 | 128945986 |
| chr10 | 128948831 | 128949099 |
| chr10 | 128950273 | 128950733 |
| chr10 | 128956195 | 128956568 |
| chr10 | 128967915 | 128968261 |
| chr10 | 128968261 | 128968619 |
| chr10 | 128968776 | 128969003 |
| chr10 | 128969063 | 128969217 |
| chr10 | 128972941 | 128973236 |
| chr10 | 128977626 | 128977834 |
| chr10 | 128980506 | 128981001 |
| chr10 | 128981001 | 128981541 |
| chr10 | 128989992 | 128990195 |

|       |           |           |
|-------|-----------|-----------|
| chr10 | 128990195 | 128990438 |
| chr10 | 128991168 | 128991355 |
| chr10 | 128992505 | 128992731 |
| chr10 | 128996567 | 128997213 |
| chr10 | 129000485 | 129000791 |
| chr10 | 129004201 | 129004552 |
| chr10 | 129004552 | 129004811 |
| chr10 | 129005320 | 129005580 |
| chr10 | 129008948 | 129009132 |
| chr10 | 129011383 | 129011819 |
| chr10 | 129023477 | 129023646 |
| chr10 | 129023658 | 129023827 |
| chr10 | 129026085 | 129026331 |
| chr10 | 129026355 | 129026580 |
| chr10 | 129101452 | 129101608 |
| chr10 | 129107142 | 129107378 |
| chr10 | 129510636 | 129510944 |
| chr10 | 129735403 | 129735607 |
| chr10 | 129973128 | 129973278 |
| chr10 | 130092940 | 130093090 |
| chr10 | 130228380 | 130228539 |
| chr10 | 130280156 | 130280313 |
| chr10 | 130313607 | 130313819 |
| chr10 | 130412252 | 130412506 |
| chr10 | 130434248 | 130434534 |
| chr10 | 130473294 | 130473490 |
| chr10 | 130541855 | 130542150 |
| chr10 | 130542150 | 130542661 |
| chr10 | 130566456 | 130566792 |
| chr10 | 130594371 | 130594688 |
| chr10 | 130594688 | 130595061 |
| chr11 | 3100401   | 3100615   |
| chr11 | 3101170   | 3101378   |
| chr11 | 3101455   | 3101647   |
| chr11 | 3101647   | 3101786   |
| chr11 | 3101976   | 3102195   |
| chr11 | 3103908   | 3104102   |
| chr11 | 3112541   | 3112702   |
| chr11 | 3112879   | 3113064   |
| chr11 | 3114513   | 3114737   |
| chr11 | 3123489   | 3123773   |
| chr11 | 3123773   | 3124025   |

|       |         |         |
|-------|---------|---------|
| chr11 | 3124025 | 3124272 |
| chr11 | 3125478 | 3125761 |
| chr11 | 3127316 | 3127631 |
| chr11 | 3132014 | 3132222 |
| chr11 | 3132888 | 3133194 |
| chr11 | 3133194 | 3133397 |
| chr11 | 3133562 | 3133779 |
| chr11 | 3133796 | 3134072 |
| chr11 | 3134353 | 3134509 |
| chr11 | 3134640 | 3134930 |
| chr11 | 3134964 | 3135413 |
| chr11 | 3135434 | 3135845 |
| chr11 | 3136778 | 3137040 |
| chr11 | 3137404 | 3137556 |
| chr11 | 3140796 | 3141205 |
| chr11 | 3142415 | 3142785 |
| chr11 | 3143063 | 3143477 |
| chr11 | 3143671 | 3143848 |
| chr11 | 3144111 | 3144338 |
| chr11 | 3144456 | 3144623 |
| chr11 | 3144627 | 3144798 |
| chr11 | 3144798 | 3144985 |
| chr11 | 3146050 | 3146324 |
| chr11 | 3146738 | 3146973 |
| chr11 | 3146973 | 3147171 |
| chr11 | 3151308 | 3151710 |
| chr11 | 3151730 | 3151974 |
| chr11 | 3151974 | 3152228 |
| chr11 | 3152388 | 3152627 |
| chr11 | 3153764 | 3153919 |
| chr11 | 3157826 | 3158026 |
| chr11 | 3158263 | 3158419 |
| chr11 | 3159286 | 3159651 |
| chr11 | 3159651 | 3160066 |
| chr11 | 3161139 | 3161615 |
| chr11 | 3162865 | 3163050 |
| chr11 | 3163715 | 3163982 |
| chr11 | 3164485 | 3164647 |
| chr11 | 3165462 | 3165683 |
| chr11 | 3167298 | 3167465 |
| chr11 | 3167538 | 3167705 |
| chr11 | 3168584 | 3169063 |



|       |         |         |
|-------|---------|---------|
| chr11 | 3170748 | 3170933 |
| chr11 | 3171276 | 3171523 |
| chr11 | 3174379 | 3174545 |
| chr11 | 3177131 | 3177320 |
| chr11 | 3177320 | 3177489 |
| chr11 | 3177489 | 3177663 |
| chr11 | 3177816 | 3178100 |
| chr11 | 3179434 | 3179730 |
| chr11 | 3179730 | 3179927 |
| chr11 | 3180030 | 3180377 |
| chr11 | 3181243 | 3181480 |
| chr11 | 3184454 | 3184607 |
| chr11 | 3184607 | 3184791 |
| chr11 | 3184791 | 3184952 |
| chr11 | 3184952 | 3185141 |
| chr11 | 3185301 | 3185600 |
| chr11 | 3185852 | 3186060 |
| chr11 | 3187873 | 3188065 |
| chr11 | 3188712 | 3188935 |
| chr11 | 3192918 | 3193266 |
| chr11 | 3193266 | 3193639 |
| chr11 | 3195587 | 3195958 |
| chr11 | 3195974 | 3196315 |
| chr11 | 3196414 | 3196673 |
| chr11 | 3196673 | 3196902 |
| chr11 | 3199021 | 3199363 |
| chr11 | 3202007 | 3202206 |
| chr11 | 3202206 | 3202467 |
| chr11 | 3202501 | 3202805 |
| chr11 | 3202805 | 3203095 |
| chr11 | 3203095 | 3203358 |
| chr11 | 3208796 | 3209029 |
| chr11 | 3212488 | 3212863 |
| chr11 | 3237827 | 3237985 |
| chr11 | 3243807 | 3244165 |
| chr11 | 3247420 | 3247724 |
| chr11 | 3265663 | 3265918 |
| chr11 | 3265962 | 3266318 |
| chr11 | 3266318 | 3266830 |
| chr11 | 3288532 | 3288728 |
| chr11 | 3289044 | 3289292 |
| chr11 | 3289292 | 3289475 |

|       |         |         |
|-------|---------|---------|
| chr11 | 3289475 | 3289807 |
| chr11 | 3289843 | 3290142 |
| chr11 | 3290142 | 3290411 |
| chr11 | 3290411 | 3290653 |
| chr11 | 3290659 | 3290887 |
| chr11 | 3292085 | 3292337 |
| chr11 | 3292337 | 3292555 |
| chr11 | 3292636 | 3292958 |
| chr11 | 3298023 | 3298304 |
| chr11 | 3300963 | 3301483 |
| chr11 | 3302894 | 3303222 |
| chr11 | 3311998 | 3312247 |
| chr11 | 3313592 | 3313742 |
| chr11 | 3314085 | 3314559 |
| chr11 | 3331765 | 3332204 |
| chr11 | 3332204 | 3332698 |
| chr11 | 3337618 | 3338122 |
| chr11 | 3347144 | 3347411 |
| chr11 | 3348334 | 3348828 |
| chr11 | 3348828 | 3349232 |
| chr11 | 3349263 | 3349576 |
| chr11 | 3353028 | 3353279 |
| chr11 | 3368936 | 3369241 |
| chr11 | 3369241 | 3369537 |
| chr11 | 3371293 | 3371665 |
| chr11 | 3372212 | 3372473 |
| chr11 | 3374226 | 3374497 |
| chr11 | 3374497 | 3374739 |
| chr11 | 3374814 | 3375104 |
| chr11 | 3377296 | 3377516 |
| chr11 | 3386909 | 3387508 |
| chr11 | 3390780 | 3391198 |
| chr11 | 3392530 | 3392817 |
| chr11 | 3392817 | 3393127 |
| chr11 | 3393177 | 3393439 |
| chr11 | 3393439 | 3393670 |
| chr11 | 3393933 | 3394091 |
| chr11 | 3396135 | 3396285 |
| chr11 | 3403161 | 3403343 |
| chr11 | 3407575 | 3407906 |
| chr11 | 3408115 | 3408283 |
| chr11 | 3408463 | 3408692 |

|       |         |         |
|-------|---------|---------|
| chr11 | 3408712 | 3409042 |
| chr11 | 3409042 | 3409402 |
| chr11 | 3409402 | 3409643 |
| chr11 | 3427817 | 3428006 |
| chr11 | 3442756 | 3443032 |
| chr11 | 3443069 | 3443611 |
| chr11 | 3451739 | 3452206 |
| chr11 | 3452206 | 3452805 |
| chr11 | 3452847 | 3453062 |
| chr11 | 3453545 | 3453783 |
| chr11 | 3472528 | 3472814 |
| chr11 | 3474805 | 3475030 |
| chr11 | 3477463 | 3477660 |
| chr11 | 3481786 | 3482044 |
| chr11 | 3482044 | 3482339 |
| chr11 | 3482339 | 3482697 |
| chr11 | 3487986 | 3488208 |
| chr11 | 3488996 | 3489173 |
| chr11 | 3490155 | 3490378 |
| chr11 | 3494770 | 3495153 |
| chr11 | 3504697 | 3504978 |
| chr11 | 3505542 | 3505699 |
| chr11 | 3508320 | 3508504 |
| chr11 | 3514481 | 3514762 |
| chr11 | 3514762 | 3515155 |
| chr11 | 3517528 | 3517782 |
| chr11 | 3519354 | 3519507 |
| chr11 | 3526295 | 3526465 |
| chr11 | 3535366 | 3535671 |
| chr11 | 3535671 | 3535944 |
| chr11 | 3538339 | 3538651 |
| chr11 | 3538651 | 3538897 |
| chr11 | 3538925 | 3539533 |
| chr11 | 3539540 | 3539772 |
| chr11 | 3558023 | 3558266 |
| chr11 | 3560076 | 3560649 |
| chr11 | 3565881 | 3566430 |
| chr11 | 3567790 | 3568278 |
| chr11 | 3573132 | 3573453 |
| chr11 | 3576781 | 3577166 |
| chr11 | 3577166 | 3577645 |
| chr11 | 3580331 | 3580661 |

|       |         |         |
|-------|---------|---------|
| chr11 | 3585899 | 3586606 |
| chr11 | 3587444 | 3587627 |
| chr11 | 3592285 | 3592440 |
| chr11 | 3602005 | 3602299 |
| chr11 | 3602299 | 3602617 |
| chr11 | 3602617 | 3603000 |
| chr11 | 3609692 | 3609896 |
| chr11 | 3622733 | 3623228 |
| chr11 | 3648512 | 3648917 |
| chr11 | 3648917 | 3649469 |
| chr11 | 3649469 | 3649953 |
| chr11 | 3676379 | 3676676 |
| chr11 | 3683991 | 3684180 |
| chr11 | 3684209 | 3684686 |
| chr11 | 3684692 | 3684865 |
| chr11 | 3692573 | 3692786 |
| chr11 | 3692786 | 3692963 |
| chr11 | 3700730 | 3700880 |
| chr11 | 3702060 | 3702540 |
| chr11 | 3703219 | 3703490 |
| chr11 | 3703599 | 3703749 |
| chr11 | 3705086 | 3705263 |
| chr11 | 3714487 | 3714772 |
| chr11 | 3727985 | 3728185 |
| chr11 | 3729731 | 3730080 |
| chr11 | 3730312 | 3730575 |
| chr11 | 3733206 | 3733373 |
| chr11 | 3738805 | 3739188 |
| chr11 | 3747304 | 3747517 |
| chr11 | 3749961 | 3750173 |
| chr11 | 3753931 | 3754081 |
| chr11 | 3754784 | 3755012 |
| chr11 | 3755433 | 3755585 |
| chr11 | 3761899 | 3762440 |
| chr11 | 3764356 | 3764711 |
| chr11 | 3767059 | 3767218 |
| chr11 | 3771497 | 3771659 |
| chr11 | 3773827 | 3774099 |
| chr11 | 3774426 | 3775111 |
| chr11 | 3779037 | 3779245 |
| chr11 | 3786652 | 3786911 |
| chr11 | 3787806 | 3788160 |

|       |         |         |
|-------|---------|---------|
| chr11 | 3790014 | 3790243 |
| chr11 | 3790847 | 3791015 |
| chr11 | 3802129 | 3802403 |
| chr11 | 3805437 | 3805664 |
| chr11 | 3807978 | 3808167 |
| chr11 | 3808183 | 3808473 |
| chr11 | 3824533 | 3824929 |
| chr11 | 3832268 | 3832561 |
| chr11 | 3832561 | 3832871 |
| chr11 | 3832871 | 3833129 |
| chr11 | 3834468 | 3834624 |
| chr11 | 3844700 | 3845095 |
| chr11 | 3847774 | 3847924 |
| chr11 | 3848060 | 3848359 |
| chr11 | 3853076 | 3853252 |
| chr11 | 3853509 | 3854057 |
| chr11 | 3857382 | 3857545 |
| chr11 | 3859715 | 3860234 |
| chr11 | 3860392 | 3860676 |
| chr11 | 3863643 | 3864095 |
| chr11 | 3870116 | 3870396 |
| chr11 | 3871673 | 3872078 |
| chr11 | 3873925 | 3874158 |
| chr11 | 3878658 | 3879037 |
| chr11 | 3879899 | 3880182 |
| chr11 | 3887257 | 3887761 |
| chr11 | 3887761 | 3888019 |
| chr11 | 3893316 | 3893477 |
| chr11 | 3894080 | 3894366 |
| chr11 | 3894454 | 3894875 |
| chr11 | 3894875 | 3895455 |
| chr11 | 3895469 | 3895821 |
| chr11 | 3899871 | 3900208 |
| chr11 | 3900307 | 3900709 |
| chr11 | 3902536 | 3902798 |
| chr11 | 3903043 | 3903420 |
| chr11 | 3905390 | 3905788 |
| chr11 | 3905788 | 3906101 |
| chr11 | 3908892 | 3909128 |
| chr11 | 3909295 | 3909484 |
| chr11 | 3911074 | 3911249 |
| chr11 | 3911561 | 3911739 |

|       |         |         |
|-------|---------|---------|
| chr11 | 3913316 | 3913624 |
| chr11 | 3913700 | 3914154 |
| chr11 | 3914154 | 3914528 |
| chr11 | 3914528 | 3914841 |
| chr11 | 3916099 | 3916409 |
| chr11 | 3921217 | 3921342 |
| chr11 | 3921342 | 3921531 |
| chr11 | 3921566 | 3921841 |
| chr11 | 3929983 | 3930137 |
| chr11 | 3930137 | 3930307 |
| chr11 | 3931641 | 3932225 |
| chr11 | 3963353 | 3963547 |
| chr11 | 3963575 | 3963826 |
| chr11 | 3963893 | 3964100 |
| chr11 | 3964100 | 3964311 |
| chr11 | 3964311 | 3964541 |
| chr11 | 3964543 | 3964694 |
| chr11 | 3969948 | 3970163 |
| chr11 | 3973311 | 3973461 |
| chr11 | 3982829 | 3983006 |
| chr11 | 3983266 | 3983522 |
| chr11 | 3983522 | 3983906 |
| chr11 | 3983906 | 3984359 |
| chr11 | 3984399 | 3984666 |
| chr11 | 3989973 | 3990123 |
| chr11 | 3993607 | 3993887 |
| chr11 | 3995468 | 3995901 |
| chr11 | 4001653 | 4002014 |
| chr11 | 4004940 | 4005230 |
| chr11 | 4007720 | 4007873 |
| chr11 | 4012739 | 4012899 |
| chr11 | 4033540 | 4033718 |
| chr11 | 4035307 | 4035813 |
| chr11 | 4035999 | 4036294 |
| chr11 | 4043767 | 4044027 |
| chr11 | 4045788 | 4046210 |
| chr11 | 4053667 | 4053989 |
| chr11 | 4061013 | 4061192 |
| chr11 | 4063088 | 4063370 |
| chr11 | 4069719 | 4069949 |
| chr11 | 4080297 | 4080563 |
| chr11 | 4083398 | 4083679 |

|       |         |         |
|-------|---------|---------|
| chr11 | 4095169 | 4095495 |
| chr11 | 4096297 | 4096478 |
| chr11 | 4096482 | 4097008 |
| chr11 | 4101826 | 4102299 |
| chr11 | 4111021 | 4111293 |
| chr11 | 4117776 | 4117946 |
| chr11 | 4118035 | 4118549 |
| chr11 | 4118549 | 4118949 |
| chr11 | 4118949 | 4119227 |
| chr11 | 4124002 | 4124394 |
| chr11 | 4134948 | 4135309 |
| chr11 | 4135309 | 4135882 |
| chr11 | 4142404 | 4142669 |
| chr11 | 4148234 | 4148405 |
| chr11 | 4159947 | 4160448 |
| chr11 | 4160448 | 4160754 |
| chr11 | 4161171 | 4161459 |
| chr11 | 4164777 | 4164997 |
| chr11 | 4176628 | 4176868 |
| chr11 | 4182131 | 4182410 |
| chr11 | 4186447 | 4186936 |
| chr11 | 4186936 | 4187358 |
| chr11 | 4190022 | 4190224 |
| chr11 | 4190646 | 4190861 |
| chr11 | 4195564 | 4196047 |
| chr11 | 4196762 | 4197058 |
| chr11 | 4198815 | 4199428 |
| chr11 | 4205200 | 4205371 |
| chr11 | 4206028 | 4206266 |
| chr11 | 4209634 | 4209880 |
| chr11 | 4210750 | 4211052 |
| chr11 | 4217811 | 4218696 |
| chr11 | 4219345 | 4219538 |
| chr11 | 4219538 | 4219784 |
| chr11 | 4220522 | 4220780 |
| chr11 | 4229594 | 4230117 |
| chr11 | 4230271 | 4230431 |
| chr11 | 4235381 | 4235603 |
| chr11 | 4237312 | 4237576 |
| chr11 | 4240138 | 4240536 |
| chr11 | 4249248 | 4249550 |
| chr11 | 4251589 | 4251977 |

|       |         |         |
|-------|---------|---------|
| chr11 | 4257111 | 4257461 |
| chr11 | 4258849 | 4259089 |
| chr11 | 4260519 | 4260933 |
| chr11 | 4261154 | 4261730 |
| chr11 | 4261942 | 4262350 |
| chr11 | 4262902 | 4263235 |
| chr11 | 4263239 | 4263399 |
| chr11 | 4264120 | 4264401 |
| chr11 | 4264865 | 4265300 |
| chr11 | 4271300 | 4271455 |
| chr11 | 4271578 | 4271823 |
| chr11 | 4272171 | 4272406 |
| chr11 | 4283652 | 4284190 |
| chr11 | 4291798 | 4292047 |
| chr11 | 4296617 | 4297174 |
| chr11 | 4297871 | 4298146 |
| chr11 | 4298601 | 4298953 |
| chr11 | 4299177 | 4299571 |
| chr11 | 4299717 | 4300071 |
| chr11 | 4302386 | 4302571 |
| chr11 | 4303092 | 4303493 |
| chr11 | 4308157 | 4308518 |
| chr11 | 4308518 | 4308785 |
| chr11 | 4308785 | 4309044 |
| chr11 | 4309044 | 4309401 |
| chr11 | 4309680 | 4309942 |
| chr11 | 4316821 | 4317078 |
| chr11 | 4317377 | 4317708 |
| chr11 | 4318112 | 4318334 |
| chr11 | 4322080 | 4322230 |
| chr11 | 4335374 | 4335704 |
| chr11 | 4335704 | 4336068 |
| chr11 | 4336219 | 4336599 |
| chr11 | 4336794 | 4337238 |
| chr11 | 4344473 | 4344704 |
| chr11 | 4345233 | 4345542 |
| chr11 | 4398346 | 4398553 |
| chr11 | 4398553 | 4398839 |
| chr11 | 4400527 | 4400726 |
| chr11 | 4401166 | 4401594 |
| chr11 | 4401594 | 4401820 |
| chr11 | 4403372 | 4403762 |



|       |         |         |
|-------|---------|---------|
| chr11 | 4404315 | 4404644 |
| chr11 | 4428481 | 4428976 |
| chr11 | 4438298 | 4438473 |
| chr11 | 4441167 | 4441362 |
| chr11 | 4445215 | 4445365 |
| chr11 | 4451182 | 4451443 |
| chr11 | 4451495 | 4451647 |
| chr11 | 4461286 | 4461501 |
| chr11 | 4466557 | 4466746 |
| chr11 | 4469228 | 4469392 |
| chr11 | 4485318 | 4485631 |
| chr11 | 4487391 | 4487553 |
| chr11 | 4507213 | 4507389 |
| chr11 | 4507475 | 4507799 |
| chr11 | 4578512 | 4579043 |
| chr11 | 4579043 | 4579415 |
| chr11 | 4594071 | 4594372 |
| chr11 | 4594372 | 4594716 |
| chr11 | 4594716 | 4595061 |
| chr11 | 4602373 | 4602591 |
| chr11 | 4605532 | 4605730 |
| chr11 | 4606485 | 4606950 |
| chr11 | 4621909 | 4622195 |
| chr11 | 4622730 | 4622919 |
| chr11 | 4628281 | 4628511 |
| chr11 | 4633444 | 4633765 |
| chr11 | 4637456 | 4637908 |
| chr11 | 4637908 | 4638249 |
| chr11 | 4638341 | 4638656 |
| chr11 | 4659896 | 4660165 |
| chr11 | 4661368 | 4661769 |
| chr11 | 4672257 | 4672547 |
| chr11 | 4674642 | 4674893 |
| chr11 | 4679353 | 4679568 |
| chr11 | 4685750 | 4685974 |
| chr11 | 4697846 | 4697996 |
| chr11 | 4700790 | 4701136 |
| chr11 | 4703992 | 4704224 |
| chr11 | 4704224 | 4704490 |
| chr11 | 4704509 | 4704804 |
| chr11 | 4712890 | 4713159 |
| chr11 | 4718621 | 4718889 |

|       |         |         |
|-------|---------|---------|
| chr11 | 4720028 | 4720235 |
| chr11 | 4720424 | 4720668 |
| chr11 | 4726548 | 4726756 |
| chr11 | 4728115 | 4728283 |
| chr11 | 4729788 | 4730005 |
| chr11 | 4730160 | 4730471 |
| chr11 | 4730471 | 4730768 |
| chr11 | 4736464 | 4736626 |
| chr11 | 4740608 | 4740858 |
| chr11 | 4744793 | 4745041 |
| chr11 | 4747003 | 4747227 |
| chr11 | 4750316 | 4750655 |
| chr11 | 4753463 | 4753846 |
| chr11 | 4759074 | 4759293 |
| chr11 | 4771900 | 4772078 |
| chr11 | 4772986 | 4773159 |
| chr11 | 4815176 | 4815369 |
| chr11 | 4822596 | 4822773 |
| chr11 | 4826213 | 4826664 |
| chr11 | 4836822 | 4837103 |
| chr11 | 4843521 | 4843793 |
| chr11 | 4848732 | 4848968 |
| chr11 | 4848968 | 4849376 |
| chr11 | 4849376 | 4849905 |
| chr11 | 4858488 | 4858759 |
| chr11 | 4860053 | 4860340 |
| chr11 | 4860417 | 4860608 |
| chr11 | 4861070 | 4861328 |
| chr11 | 4865955 | 4866193 |
| chr11 | 4867263 | 4867418 |
| chr11 | 4867423 | 4867676 |
| chr11 | 4873781 | 4874140 |
| chr11 | 4874140 | 4874481 |
| chr11 | 4874484 | 4874919 |
| chr11 | 4883070 | 4883344 |
| chr11 | 4883372 | 4883527 |
| chr11 | 4883579 | 4883756 |
| chr11 | 4883932 | 4884118 |
| chr11 | 4885478 | 4885647 |
| chr11 | 4888923 | 4889075 |
| chr11 | 4894937 | 4895185 |
| chr11 | 4895185 | 4895481 |

|       |         |         |
|-------|---------|---------|
| chr11 | 4895481 | 4895844 |
| chr11 | 4915972 | 4916185 |
| chr11 | 4916185 | 4916450 |
| chr11 | 4946907 | 4947323 |
| chr11 | 4947323 | 4947681 |
| chr11 | 4947681 | 4948055 |
| chr11 | 4949305 | 4949644 |
| chr11 | 4954034 | 4954219 |
| chr11 | 4954267 | 4954452 |
| chr11 | 4973229 | 4973520 |
| chr11 | 4973520 | 4973760 |
| chr11 | 4975704 | 4975944 |
| chr11 | 4977375 | 4977617 |
| chr11 | 4979629 | 4979858 |
| chr11 | 4979858 | 4980084 |
| chr11 | 4985657 | 4985888 |
| chr11 | 4986482 | 4986632 |
| chr11 | 4986648 | 4987060 |
| chr11 | 4987163 | 4987396 |
| chr11 | 4987488 | 4987643 |
| chr11 | 4998012 | 4998355 |
| chr11 | 4998355 | 4998690 |
| chr11 | 4998889 | 4999085 |
| chr11 | 5009755 | 5010064 |
| chr11 | 5015750 | 5016096 |
| chr11 | 5016220 | 5016720 |
| chr11 | 5022230 | 5022382 |
| chr11 | 5042913 | 5043531 |
| chr11 | 5046614 | 5046871 |
| chr11 | 5048879 | 5049071 |
| chr11 | 5054188 | 5054449 |
| chr11 | 5058045 | 5058195 |
| chr11 | 5061510 | 5062226 |
| chr11 | 5064158 | 5064354 |
| chr11 | 5064727 | 5064950 |
| chr11 | 5065013 | 5065219 |
| chr11 | 5065219 | 5065494 |
| chr11 | 5065494 | 5065852 |
| chr11 | 5070850 | 5071000 |
| chr11 | 5075006 | 5075196 |
| chr11 | 5075196 | 5075346 |
| chr11 | 5075844 | 5076113 |

|       |         |         |
|-------|---------|---------|
| chr11 | 5076126 | 5076305 |
| chr11 | 5076969 | 5077128 |
| chr11 | 5087941 | 5088155 |
| chr11 | 5091760 | 5092044 |
| chr11 | 5098576 | 5098928 |
| chr11 | 5098928 | 5099246 |
| chr11 | 5099246 | 5099534 |
| chr11 | 5099534 | 5099750 |
| chr11 | 5099750 | 5099981 |
| chr11 | 5099981 | 5100236 |
| chr11 | 5100429 | 5100616 |
| chr11 | 5114726 | 5114920 |
| chr11 | 5114946 | 5115412 |
| chr11 | 5125591 | 5125949 |
| chr11 | 5131830 | 5132139 |
| chr11 | 5140575 | 5141014 |
| chr11 | 5141014 | 5141335 |
| chr11 | 5141359 | 5141509 |
| chr11 | 5146635 | 5147063 |
| chr11 | 5151715 | 5151887 |
| chr11 | 5152029 | 5152329 |
| chr11 | 5152484 | 5152668 |
| chr11 | 5159840 | 5160030 |
| chr11 | 5160030 | 5160209 |
| chr11 | 5160798 | 5161031 |
| chr11 | 5168313 | 5168553 |
| chr11 | 5168553 | 5168785 |
| chr11 | 5168785 | 5169008 |
| chr11 | 5169008 | 5169309 |
| chr11 | 5169309 | 5169658 |
| chr11 | 5169658 | 5169890 |
| chr11 | 5169980 | 5170432 |
| chr11 | 5181897 | 5182195 |
| chr11 | 5182527 | 5182695 |
| chr11 | 5182813 | 5183155 |
| chr11 | 5186200 | 5186425 |
| chr11 | 5186425 | 5186601 |
| chr11 | 5193345 | 5193561 |
| chr11 | 5197063 | 5197278 |
| chr11 | 5197278 | 5197491 |
| chr11 | 5198967 | 5199177 |
| chr11 | 5219038 | 5219254 |

|       |         |         |
|-------|---------|---------|
| chr11 | 5219310 | 5219704 |
| chr11 | 5219971 | 5220170 |
| chr11 | 5227216 | 5227471 |
| chr11 | 5227471 | 5227985 |
| chr11 | 5228488 | 5228710 |
| chr11 | 5237711 | 5238145 |
| chr11 | 5240326 | 5240627 |
| chr11 | 5242063 | 5242492 |
| chr11 | 5243828 | 5244015 |
| chr11 | 5244046 | 5244293 |
| chr11 | 5244293 | 5244573 |
| chr11 | 5244810 | 5245185 |
| chr11 | 5245277 | 5245508 |
| chr11 | 5245508 | 5245758 |
| chr11 | 5245798 | 5246005 |
| chr11 | 5251114 | 5251375 |
| chr11 | 5252479 | 5252788 |
| chr11 | 5253138 | 5253351 |
| chr11 | 5261015 | 5261362 |
| chr11 | 5261464 | 5261787 |
| chr11 | 5261787 | 5262151 |
| chr11 | 5281956 | 5282151 |
| chr11 | 5284194 | 5284410 |
| chr11 | 5288424 | 5288646 |
| chr11 | 5290763 | 5290995 |
| chr11 | 5294894 | 5295228 |
| chr11 | 5296603 | 5297019 |
| chr11 | 5297109 | 5297501 |
| chr11 | 5304403 | 5305043 |
| chr11 | 5305159 | 5305365 |
| chr11 | 5330710 | 5330871 |
| chr11 | 5331003 | 5331158 |
| chr11 | 5333781 | 5333948 |
| chr11 | 5343726 | 5344002 |
| chr11 | 5352699 | 5352869 |
| chr11 | 5353090 | 5353328 |
| chr11 | 5353328 | 5353633 |
| chr11 | 5354716 | 5355144 |
| chr11 | 5367664 | 5367966 |
| chr11 | 5398455 | 5398619 |
| chr11 | 5432378 | 5432685 |
| chr11 | 5434075 | 5434414 |

|       |         |         |
|-------|---------|---------|
| chr11 | 5434901 | 5435051 |
| chr11 | 5437460 | 5437623 |
| chr11 | 5437688 | 5437858 |
| chr11 | 5443464 | 5443979 |
| chr11 | 5444054 | 5444314 |
| chr11 | 5444314 | 5444656 |
| chr11 | 5444656 | 5445015 |
| chr11 | 5445015 | 5445229 |
| chr11 | 5445229 | 5445433 |
| chr11 | 5470888 | 5471058 |
| chr11 | 5471222 | 5471376 |
| chr11 | 5474237 | 5474511 |
| chr11 | 5484483 | 5484701 |
| chr11 | 5485179 | 5485612 |
| chr11 | 5485640 | 5485810 |
| chr11 | 5485810 | 5486046 |
| chr11 | 5496942 | 5497092 |
| chr11 | 5509398 | 5509622 |
| chr11 | 5520500 | 5521037 |
| chr11 | 5521037 | 5521289 |
| chr11 | 5521289 | 5521507 |
| chr11 | 5521507 | 5521761 |
| chr11 | 5521761 | 5522037 |
| chr11 | 5522037 | 5522330 |
| chr11 | 5527958 | 5528139 |
| chr11 | 5528181 | 5528448 |
| chr11 | 5533157 | 5533414 |
| chr11 | 5541724 | 5542134 |
| chr11 | 5542134 | 5542565 |
| chr11 | 5551541 | 5551691 |
| chr11 | 5552063 | 5552261 |
| chr11 | 5554389 | 5554938 |
| chr11 | 5565693 | 5565912 |
| chr11 | 5629161 | 5629428 |
| chr11 | 5650394 | 5650641 |
| chr11 | 5691881 | 5692052 |
| chr11 | 5700932 | 5701090 |
| chr11 | 5701127 | 5701321 |
| chr11 | 5701377 | 5701730 |
| chr11 | 5701730 | 5702070 |
| chr11 | 5706986 | 5707155 |
| chr11 | 5707160 | 5707490 |

|       |         |         |
|-------|---------|---------|
| chr11 | 5707490 | 5708089 |
| chr11 | 5720093 | 5720250 |
| chr11 | 5720497 | 5720665 |
| chr11 | 5734421 | 5734686 |
| chr11 | 5734686 | 5734907 |
| chr11 | 5737195 | 5737565 |
| chr11 | 5740575 | 5740996 |
| chr11 | 5740996 | 5741548 |
| chr11 | 5761829 | 5762247 |
| chr11 | 5762247 | 5762604 |
| chr11 | 5766151 | 5766443 |
| chr11 | 5777589 | 5777879 |
| chr11 | 5778505 | 5778769 |
| chr11 | 5782665 | 5782887 |
| chr11 | 5788084 | 5788654 |
| chr11 | 5788654 | 5789103 |
| chr11 | 5795731 | 5796063 |
| chr11 | 5820654 | 5820970 |
| chr11 | 5822276 | 5822600 |
| chr11 | 5824853 | 5825158 |
| chr11 | 5825511 | 5825701 |
| chr11 | 5826299 | 5826471 |
| chr11 | 5828788 | 5829041 |
| chr11 | 5835088 | 5835518 |
| chr11 | 5836102 | 5836613 |
| chr11 | 5837393 | 5838277 |
| chr11 | 5849335 | 5849705 |
| chr11 | 5849705 | 5850014 |
| chr11 | 5851415 | 5851631 |
| chr11 | 5854491 | 5854649 |
| chr11 | 5855488 | 5855762 |
| chr11 | 5855868 | 5856293 |
| chr11 | 5860165 | 5860504 |
| chr11 | 5860708 | 5860907 |
| chr11 | 5861612 | 5861826 |
| chr11 | 5861826 | 5862022 |
| chr11 | 5862044 | 5862289 |
| chr11 | 5862441 | 5862654 |
| chr11 | 5862725 | 5863086 |
| chr11 | 5877939 | 5878583 |
| chr11 | 5880009 | 5880235 |
| chr11 | 5886148 | 5886558 |

|       |         |         |
|-------|---------|---------|
| chr11 | 5888040 | 5888195 |
| chr11 | 5892142 | 5892577 |
| chr11 | 5894513 | 5894839 |
| chr11 | 5895277 | 5895674 |
| chr11 | 5895756 | 5896130 |
| chr11 | 5896598 | 5896827 |
| chr11 | 5901919 | 5902330 |
| chr11 | 5902330 | 5902730 |
| chr11 | 5903793 | 5904013 |
| chr11 | 5908575 | 5908972 |
| chr11 | 5909365 | 5909762 |
| chr11 | 5912712 | 5912960 |
| chr11 | 5912960 | 5913292 |
| chr11 | 5915872 | 5916136 |
| chr11 | 5920408 | 5920623 |
| chr11 | 5930633 | 5930848 |
| chr11 | 5944887 | 5945107 |
| chr11 | 5945175 | 5945501 |
| chr11 | 5949902 | 5950338 |
| chr11 | 5955194 | 5955444 |
| chr11 | 5955485 | 5955891 |
| chr11 | 5955891 | 5956239 |
| chr11 | 5956619 | 5956917 |
| chr11 | 5976248 | 5976428 |
| chr11 | 5981434 | 5981588 |
| chr11 | 5989925 | 5990138 |
| chr11 | 5990990 | 5991226 |
| chr11 | 5996030 | 5996299 |
| chr11 | 5998555 | 5998972 |
| chr11 | 6000357 | 6000858 |
| chr11 | 6001887 | 6002370 |
| chr11 | 6002698 | 6002965 |
| chr11 | 6005426 | 6005605 |
| chr11 | 6005637 | 6005978 |
| chr11 | 6010745 | 6011253 |
| chr11 | 6016482 | 6016646 |
| chr11 | 6017249 | 6017419 |
| chr11 | 6017719 | 6018052 |
| chr11 | 6018742 | 6018954 |
| chr11 | 6023965 | 6024152 |
| chr11 | 6026405 | 6026685 |
| chr11 | 6026685 | 6026881 |



|       |         |         |
|-------|---------|---------|
| chr11 | 6026881 | 6027032 |
| chr11 | 6033239 | 6033413 |
| chr11 | 6035953 | 6036103 |
| chr11 | 6037433 | 6037743 |
| chr11 | 6037743 | 6038221 |
| chr11 | 6047800 | 6048054 |
| chr11 | 6049132 | 6049403 |
| chr11 | 6065492 | 6065817 |
| chr11 | 6065817 | 6065965 |
| chr11 | 6065965 | 6066143 |
| chr11 | 6068252 | 6068484 |
| chr11 | 6068713 | 6068872 |
| chr11 | 6070354 | 6070536 |
| chr11 | 6070548 | 6070747 |
| chr11 | 6103252 | 6103445 |
| chr11 | 6103833 | 6104066 |
| chr11 | 6114232 | 6114523 |
| chr11 | 6128793 | 6128945 |
| chr11 | 6130680 | 6130851 |
| chr11 | 6169315 | 6169599 |
| chr11 | 6174730 | 6175239 |
| chr11 | 6175577 | 6175798 |
| chr11 | 6187866 | 6188327 |
| chr11 | 6199418 | 6199607 |
| chr11 | 6199607 | 6199812 |
| chr11 | 6199812 | 6200059 |
| chr11 | 6200059 | 6200313 |
| chr11 | 6200313 | 6200595 |
| chr11 | 6201349 | 6201600 |
| chr11 | 6206994 | 6207241 |
| chr11 | 6216884 | 6217185 |
| chr11 | 6217185 | 6217394 |
| chr11 | 6223396 | 6223580 |
| chr11 | 6254644 | 6254970 |
| chr11 | 6256635 | 6256931 |
| chr11 | 6261734 | 6262030 |
| chr11 | 6267254 | 6267652 |
| chr11 | 6267652 | 6268142 |
| chr11 | 6273789 | 6273965 |
| chr11 | 6274142 | 6274296 |
| chr11 | 6274405 | 6274780 |
| chr11 | 6274780 | 6275118 |

|       |         |         |
|-------|---------|---------|
| chr11 | 6275118 | 6275423 |
| chr11 | 6286314 | 6286509 |
| chr11 | 6291399 | 6291750 |
| chr11 | 6291750 | 6292071 |
| chr11 | 6292071 | 6292402 |
| chr11 | 6292402 | 6292678 |
| chr11 | 6305753 | 6306072 |
| chr11 | 6341595 | 6341794 |
| chr11 | 6365925 | 6366291 |
| chr11 | 6367272 | 6367450 |
| chr11 | 6369808 | 6370126 |
| chr11 | 6371276 | 6371715 |
| chr11 | 6371753 | 6371910 |
| chr11 | 6372853 | 6373079 |
| chr11 | 6373968 | 6374118 |
| chr11 | 6380822 | 6381421 |
| chr11 | 6388713 | 6389175 |
| chr11 | 6389175 | 6389595 |
| chr11 | 6389595 | 6390009 |
| chr11 | 6396679 | 6396838 |
| chr11 | 6397526 | 6397789 |
| chr11 | 6402769 | 6403061 |
| chr11 | 6406180 | 6406628 |
| chr11 | 6406630 | 6406843 |
| chr11 | 6414530 | 6414754 |
| chr11 | 6414786 | 6415135 |
| chr11 | 6415307 | 6415582 |
| chr11 | 6415582 | 6415981 |
| chr11 | 6415981 | 6416449 |
| chr11 | 6416560 | 6416802 |
| chr11 | 6420400 | 6420715 |
| chr11 | 6420819 | 6420999 |
| chr11 | 6436492 | 6436795 |
| chr11 | 6443991 | 6444388 |
| chr11 | 6444388 | 6444856 |
| chr11 | 6451683 | 6451948 |
| chr11 | 6465038 | 6465489 |
| chr11 | 6472152 | 6472339 |
| chr11 | 6474839 | 6475336 |
| chr11 | 6475336 | 6475719 |
| chr11 | 6475742 | 6475892 |
| chr11 | 6475895 | 6476277 |

|       |         |         |
|-------|---------|---------|
| chr11 | 6476277 | 6476514 |
| chr11 | 6485034 | 6485291 |
| chr11 | 6490110 | 6490452 |
| chr11 | 6494278 | 6494582 |
| chr11 | 6497737 | 6498028 |
| chr11 | 6500901 | 6501095 |
| chr11 | 6506904 | 6507229 |
| chr11 | 6507229 | 6507541 |
| chr11 | 6510241 | 6510449 |
| chr11 | 6523591 | 6524002 |
| chr11 | 6526740 | 6526941 |
| chr11 | 6528035 | 6528246 |
| chr11 | 6528246 | 6528554 |
| chr11 | 6528554 | 6529088 |
| chr11 | 6539905 | 6540083 |
| chr11 | 6540234 | 6540555 |
| chr11 | 6546184 | 6546632 |
| chr11 | 6546632 | 6547004 |
| chr11 | 6547004 | 6547388 |
| chr11 | 6559737 | 6559947 |
| chr11 | 6572750 | 6573033 |
| chr11 | 6586772 | 6586997 |
| chr11 | 6587179 | 6587598 |
| chr11 | 6598349 | 6598678 |
| chr11 | 6599845 | 6600018 |
| chr11 | 6603759 | 6603923 |
| chr11 | 6604042 | 6604274 |
| chr11 | 6604974 | 6605136 |
| chr11 | 6605430 | 6605654 |
| chr11 | 6605654 | 6605910 |
| chr11 | 6605972 | 6606255 |
| chr11 | 6611473 | 6611633 |
| chr11 | 6615629 | 6615792 |
| chr11 | 6617127 | 6617277 |
| chr11 | 6618447 | 6618688 |
| chr11 | 6625699 | 6625948 |
| chr11 | 6625948 | 6626464 |
| chr11 | 6626501 | 6626660 |
| chr11 | 6628617 | 6628871 |
| chr11 | 6636238 | 6636567 |
| chr11 | 6637661 | 6637852 |
| chr11 | 6639783 | 6639940 |

|       |         |         |
|-------|---------|---------|
| chr11 | 6644560 | 6644900 |
| chr11 | 6654975 | 6655213 |
| chr11 | 6655213 | 6655424 |
| chr11 | 6658358 | 6658652 |
| chr11 | 6660086 | 6660285 |
| chr11 | 6664638 | 6664919 |
| chr11 | 6666612 | 6666988 |
| chr11 | 6670153 | 6670382 |
| chr11 | 6674502 | 6674979 |
| chr11 | 6677588 | 6677866 |
| chr11 | 6689509 | 6689761 |
| chr11 | 6689761 | 6690228 |
| chr11 | 6695168 | 6695720 |
| chr11 | 6697863 | 6698129 |
| chr11 | 6698252 | 6698654 |
| chr11 | 6710373 | 6710581 |
| chr11 | 6710581 | 6710798 |
| chr11 | 6710814 | 6711084 |
| chr11 | 6714177 | 6714547 |
| chr11 | 6716514 | 6716676 |
| chr11 | 6716689 | 6716898 |
| chr11 | 6735212 | 6735500 |
| chr11 | 6735500 | 6735770 |
| chr11 | 6736308 | 6736545 |
| chr11 | 6749737 | 6750080 |
| chr11 | 6758036 | 6758343 |
| chr11 | 6768737 | 6768889 |
| chr11 | 6768904 | 6769181 |
| chr11 | 6769212 | 6769362 |
| chr11 | 6785558 | 6785751 |
| chr11 | 6790772 | 6790941 |
| chr11 | 6828326 | 6828739 |
| chr11 | 6837609 | 6837790 |
| chr11 | 6855792 | 6856372 |
| chr11 | 6866629 | 6866779 |
| chr11 | 6873114 | 6873308 |
| chr11 | 6881761 | 6881912 |
| chr11 | 6884395 | 6884712 |
| chr11 | 6894916 | 6895636 |
| chr11 | 6895636 | 6895964 |
| chr11 | 6895964 | 6896212 |
| chr11 | 6902342 | 6902592 |

|       |         |         |
|-------|---------|---------|
| chr11 | 6902800 | 6903032 |
| chr11 | 6925465 | 6925816 |
| chr11 | 6930952 | 6931284 |
| chr11 | 6937232 | 6937441 |
| chr11 | 6937441 | 6937764 |
| chr11 | 6937764 | 6938073 |
| chr11 | 6961192 | 6961463 |
| chr11 | 6963612 | 6963869 |
| chr11 | 6963869 | 6964142 |
| chr11 | 6966883 | 6967140 |
| chr11 | 6980699 | 6980907 |
| chr11 | 6981362 | 6981638 |
| chr11 | 6990675 | 6990910 |
| chr11 | 6993544 | 6993694 |
| chr11 | 6993864 | 6994110 |
| chr11 | 6994110 | 6994673 |
| chr11 | 6995045 | 6995242 |
| chr11 | 7015224 | 7015498 |
| chr11 | 7018788 | 7019200 |
| chr11 | 7019200 | 7019565 |
| chr11 | 7037253 | 7037433 |
| chr11 | 7041401 | 7041589 |
| chr11 | 7052547 | 7052798 |
| chr11 | 7053389 | 7053837 |
| chr11 | 7053861 | 7054058 |
| chr11 | 7063184 | 7063513 |
| chr11 | 7063591 | 7063896 |
| chr11 | 7063896 | 7064302 |
| chr11 | 7064329 | 7064734 |
| chr11 | 7076638 | 7076793 |
| chr11 | 7095949 | 7096277 |
| chr11 | 7096308 | 7096478 |
| chr11 | 7105443 | 7105887 |
| chr11 | 7105887 | 7106461 |
| chr11 | 7124522 | 7124785 |
| chr11 | 7129493 | 7129733 |
| chr11 | 7138087 | 7138318 |
| chr11 | 7140516 | 7140837 |
| chr11 | 7142832 | 7142998 |
| chr11 | 7145025 | 7145262 |
| chr11 | 7145262 | 7145631 |
| chr11 | 7153198 | 7153368 |

|       |         |         |
|-------|---------|---------|
| chr11 | 7153803 | 7154012 |
| chr11 | 7156225 | 7156672 |
| chr11 | 7161650 | 7161825 |
| chr11 | 7175008 | 7175316 |
| chr11 | 7184515 | 7184747 |
| chr11 | 7194207 | 7194661 |
| chr11 | 7194661 | 7194917 |
| chr11 | 7200099 | 7200338 |
| chr11 | 7205229 | 7205672 |
| chr11 | 7205672 | 7206026 |
| chr11 | 7210484 | 7210660 |
| chr11 | 7213298 | 7213765 |
| chr11 | 7213765 | 7214003 |
| chr11 | 7214003 | 7214507 |
| chr11 | 7216358 | 7216545 |
| chr11 | 7221982 | 7222325 |
| chr11 | 7226820 | 7227130 |
| chr11 | 7234212 | 7234442 |
| chr11 | 7237642 | 7238221 |
| chr11 | 7239052 | 7239456 |
| chr11 | 7239456 | 7239766 |
| chr11 | 7242789 | 7243125 |
| chr11 | 7295754 | 7296108 |
| chr11 | 7299417 | 7299604 |
| chr11 | 7299957 | 7300439 |
| chr11 | 7301185 | 7301354 |
| chr11 | 7317417 | 7317764 |
| chr11 | 7370284 | 7370474 |
| chr11 | 7404956 | 7405155 |
| chr11 | 7417440 | 7417667 |
| chr11 | 7423427 | 7424541 |
| chr11 | 7441759 | 7442111 |
| chr11 | 7457323 | 7457563 |
| chr11 | 7467205 | 7467362 |
| chr11 | 7502827 | 7503091 |
| chr11 | 7503481 | 7503696 |
| chr11 | 7503696 | 7503939 |
| chr11 | 7504336 | 7504491 |
| chr11 | 7504718 | 7504944 |
| chr11 | 7517768 | 7518116 |
| chr11 | 7561425 | 7561887 |
| chr11 | 7561988 | 7562197 |

|       |         |         |
|-------|---------|---------|
| chr11 | 7562197 | 7562420 |
| chr11 | 7615484 | 7615687 |
| chr11 | 7630634 | 7630785 |
| chr11 | 7664677 | 7664970 |
| chr11 | 7676806 | 7677048 |
| chr11 | 7683221 | 7683460 |
| chr11 | 7684024 | 7684213 |
| chr11 | 7705384 | 7705537 |
| chr11 | 7731736 | 7732240 |
| chr11 | 7737443 | 7737655 |
| chr11 | 7758092 | 7758257 |
| chr11 | 7777061 | 7777309 |
| chr11 | 7777916 | 7778091 |
| chr11 | 7780409 | 7780941 |
| chr11 | 7780941 | 7781250 |
| chr11 | 7793774 | 7794290 |
| chr11 | 7794290 | 7794769 |
| chr11 | 7795716 | 7795997 |
| chr11 | 7796198 | 7796684 |
| chr11 | 7798936 | 7799297 |
| chr11 | 7808491 | 7808924 |
| chr11 | 7814686 | 7814842 |
| chr11 | 7820156 | 7820335 |
| chr11 | 7820412 | 7820562 |
| chr11 | 7822626 | 7822816 |
| chr11 | 7862660 | 7862863 |
| chr11 | 7869725 | 7869905 |
| chr11 | 7900322 | 7900683 |
| chr11 | 7917224 | 7917397 |
| chr11 | 7933500 | 7933704 |
| chr11 | 7934745 | 7935072 |
| chr11 | 7995698 | 7996057 |
| chr11 | 7996132 | 7996297 |
| chr11 | 7998910 | 7999120 |
| chr11 | 8088577 | 8088781 |
| chr11 | 8105041 | 8105247 |
| chr11 | 8137434 | 8137708 |
| chr11 | 8140100 | 8140453 |
| chr11 | 8157647 | 8157823 |
| chr11 | 8210407 | 8210597 |
| chr11 | 8227805 | 8228204 |
| chr11 | 8247576 | 8247776 |

|       |         |         |
|-------|---------|---------|
| chr11 | 8251793 | 8252031 |
| chr11 | 8269138 | 8269545 |
| chr11 | 8281850 | 8282001 |
| chr11 | 8302891 | 8303141 |
| chr11 | 8365456 | 8366015 |
| chr11 | 8366328 | 8366619 |
| chr11 | 8379593 | 8379779 |
| chr11 | 8391988 | 8392138 |
| chr11 | 8405589 | 8405905 |
| chr11 | 8421908 | 8422095 |
| chr11 | 8424256 | 8424752 |
| chr11 | 8424752 | 8425235 |
| chr11 | 8425235 | 8425522 |
| chr11 | 8425596 | 8425824 |
| chr11 | 8433085 | 8433319 |
| chr11 | 8434668 | 8434858 |
| chr11 | 8438618 | 8438796 |
| chr11 | 8443445 | 8443834 |
| chr11 | 8443834 | 8444231 |
| chr11 | 8444821 | 8445058 |
| chr11 | 8445058 | 8445398 |
| chr11 | 8445900 | 8446057 |
| chr11 | 8450666 | 8450952 |
| chr11 | 8451016 | 8451452 |
| chr11 | 8451456 | 8452123 |
| chr11 | 8463123 | 8463639 |
| chr11 | 8463786 | 8464247 |
| chr11 | 8466077 | 8466408 |
| chr11 | 8466581 | 8466793 |
| chr11 | 8468203 | 8468493 |
| chr11 | 8468493 | 8469121 |
| chr11 | 8476387 | 8476566 |
| chr11 | 8484272 | 8484486 |
| chr11 | 8484611 | 8484880 |
| chr11 | 8486196 | 8486353 |
| chr11 | 8488324 | 8488487 |
| chr11 | 8492952 | 8493349 |
| chr11 | 8498862 | 8499074 |
| chr11 | 8503431 | 8503776 |
| chr11 | 8503776 | 8504109 |
| chr11 | 8509644 | 8510128 |
| chr11 | 8513419 | 8513655 |



|       |         |         |
|-------|---------|---------|
| chr11 | 8515268 | 8515418 |
| chr11 | 8521173 | 8521323 |
| chr11 | 8521341 | 8521750 |
| chr11 | 8522981 | 8523152 |
| chr11 | 8523720 | 8523916 |
| chr11 | 8523916 | 8524153 |
| chr11 | 8524218 | 8524368 |
| chr11 | 8524388 | 8524538 |
| chr11 | 8530086 | 8530312 |
| chr11 | 8532183 | 8532421 |
| chr11 | 8532913 | 8533128 |
| chr11 | 8534950 | 8535220 |
| chr11 | 8535220 | 8535555 |
| chr11 | 8540372 | 8540626 |
| chr11 | 8544450 | 8544622 |
| chr11 | 8545840 | 8546095 |
| chr11 | 8547773 | 8547993 |
| chr11 | 8548708 | 8549079 |
| chr11 | 8549143 | 8549382 |
| chr11 | 8554038 | 8554225 |
| chr11 | 8554574 | 8554759 |
| chr11 | 8555297 | 8555478 |
| chr11 | 8557118 | 8557275 |
| chr11 | 8558013 | 8558174 |
| chr11 | 8563680 | 8564013 |
| chr11 | 8564026 | 8564360 |
| chr11 | 8564360 | 8564717 |
| chr11 | 8573055 | 8573305 |
| chr11 | 8575230 | 8575631 |
| chr11 | 8579662 | 8580400 |
| chr11 | 8582138 | 8582431 |
| chr11 | 8582532 | 8582956 |
| chr11 | 8582980 | 8583153 |
| chr11 | 8588043 | 8588282 |
| chr11 | 8588295 | 8588445 |
| chr11 | 8589288 | 8589809 |
| chr11 | 8589809 | 8590184 |
| chr11 | 8591414 | 8591566 |
| chr11 | 8593230 | 8593489 |
| chr11 | 8593489 | 8593738 |
| chr11 | 8603044 | 8603250 |
| chr11 | 8615526 | 8615832 |

|       |         |         |
|-------|---------|---------|
| chr11 | 8616023 | 8616204 |
| chr11 | 8616483 | 8616646 |
| chr11 | 8624587 | 8624892 |
| chr11 | 8626006 | 8626282 |
| chr11 | 8626732 | 8627053 |
| chr11 | 8627170 | 8627415 |
| chr11 | 8628566 | 8628716 |
| chr11 | 8628787 | 8629037 |
| chr11 | 8629037 | 8629315 |
| chr11 | 8634618 | 8635034 |
| chr11 | 8635034 | 8635423 |
| chr11 | 8635704 | 8636286 |
| chr11 | 8649587 | 8649789 |
| chr11 | 8654044 | 8654230 |
| chr11 | 8654237 | 8654398 |
| chr11 | 8655425 | 8655661 |
| chr11 | 8656540 | 8656962 |
| chr11 | 8663476 | 8663762 |
| chr11 | 8663762 | 8664005 |
| chr11 | 8664005 | 8664232 |
| chr11 | 8664232 | 8664462 |
| chr11 | 8664462 | 8664726 |
| chr11 | 8664726 | 8664982 |
| chr11 | 8668064 | 8668391 |
| chr11 | 8669183 | 8669496 |
| chr11 | 8673836 | 8674123 |
| chr11 | 8674635 | 8675204 |
| chr11 | 8675204 | 8675490 |
| chr11 | 8678255 | 8678585 |
| chr11 | 8684343 | 8684526 |
| chr11 | 8684931 | 8685207 |
| chr11 | 8685207 | 8685558 |
| chr11 | 8686114 | 8686349 |
| chr11 | 8692231 | 8692505 |
| chr11 | 8692505 | 8692812 |
| chr11 | 8692812 | 8693146 |
| chr11 | 8693184 | 8693490 |
| chr11 | 8693490 | 8693705 |
| chr11 | 8701922 | 8702334 |
| chr11 | 8705057 | 8705625 |
| chr11 | 8709682 | 8709988 |
| chr11 | 8718121 | 8718339 |

|       |         |         |
|-------|---------|---------|
| chr11 | 8719680 | 8719926 |
| chr11 | 8759004 | 8759173 |
| chr11 | 8759886 | 8760185 |
| chr11 | 8764807 | 8765102 |
| chr11 | 8777328 | 8777615 |
| chr11 | 8787168 | 8787372 |
| chr11 | 8787754 | 8787909 |
| chr11 | 8788089 | 8788319 |
| chr11 | 8788387 | 8788585 |
| chr11 | 8795196 | 8795469 |
| chr11 | 8795469 | 8795713 |
| chr11 | 8797840 | 8798013 |
| chr11 | 8819109 | 8819337 |
| chr11 | 8821228 | 8821955 |
| chr11 | 8826556 | 8827053 |
| chr11 | 8827385 | 8827735 |
| chr11 | 8830532 | 8830866 |
| chr11 | 8830866 | 8831114 |
| chr11 | 8831114 | 8831328 |
| chr11 | 8834211 | 8834614 |
| chr11 | 8847600 | 8847942 |
| chr11 | 8859961 | 8860315 |
| chr11 | 8860944 | 8861125 |
| chr11 | 8879361 | 8879574 |
| chr11 | 8886023 | 8886505 |
| chr11 | 8886526 | 8886752 |
| chr11 | 8886752 | 8887099 |
| chr11 | 8910119 | 8910463 |
| chr11 | 8910463 | 8910809 |
| chr11 | 8910854 | 8911007 |
| chr11 | 8916121 | 8916466 |
| chr11 | 8920299 | 8920613 |
| chr11 | 8928629 | 8928896 |
| chr11 | 8938641 | 8938886 |
| chr11 | 8938949 | 8939141 |
| chr11 | 8942580 | 8942808 |
| chr11 | 8945536 | 8945725 |
| chr11 | 8945725 | 8945902 |
| chr11 | 8948088 | 8948734 |
| chr11 | 8955724 | 8956063 |
| chr11 | 8957100 | 8957338 |
| chr11 | 8966018 | 8966229 |

|       |          |          |
|-------|----------|----------|
| chr11 | 8983374  | 8983529  |
| chr11 | 8984096  | 8984281  |
| chr11 | 8991100  | 8991362  |
| chr11 | 8991650  | 8991833  |
| chr11 | 9010428  | 9010884  |
| chr11 | 9010884  | 9011369  |
| chr11 | 9011416  | 9011599  |
| chr11 | 9018937  | 9019150  |
| chr11 | 9041309  | 9041479  |
| chr11 | 9048343  | 9048748  |
| chr11 | 9048748  | 9049246  |
| chr11 | 9117654  | 9118093  |
| chr11 | 9118093  | 9118361  |
| chr11 | 9118361  | 9118656  |
| chr11 | 9118656  | 9118906  |
| chr11 | 9125801  | 9125982  |
| chr11 | 9126087  | 9126342  |
| chr11 | 9126414  | 9126746  |
| chr11 | 9126746  | 9127070  |
| chr11 | 9135690  | 9135995  |
| chr11 | 9136495  | 9136834  |
| chr11 | 9139928  | 9140221  |
| chr11 | 9189591  | 9189805  |
| chr11 | 9194986  | 9195302  |
| chr11 | 9248892  | 9249046  |
| chr11 | 9287373  | 9287543  |
| chr11 | 9316569  | 9316753  |
| chr11 | 9317370  | 9317581  |
| chr11 | 9382743  | 9382932  |
| chr11 | 9497201  | 9497416  |
| chr11 | 9497590  | 9497923  |
| chr11 | 9499824  | 9499992  |
| chr11 | 9519897  | 9520126  |
| chr11 | 9556917  | 9557186  |
| chr11 | 9731614  | 9731764  |
| chr11 | 9966314  | 9966482  |
| chr11 | 9989549  | 9989726  |
| chr11 | 10046389 | 10046818 |
| chr11 | 10050323 | 10050643 |
| chr11 | 10102360 | 10102668 |
| chr11 | 10102940 | 10103099 |
| chr11 | 10103156 | 10103712 |

|       |          |          |
|-------|----------|----------|
| chr11 | 10193810 | 10194089 |
| chr11 | 10194904 | 10195070 |
| chr11 | 10328955 | 10329163 |
| chr11 | 11112038 | 11112197 |
| chr11 | 11113962 | 11114119 |
| chr11 | 11114348 | 11114511 |
| chr11 | 11239497 | 11239653 |
| chr11 | 11248501 | 11248651 |
| chr11 | 11461650 | 11461845 |
| chr11 | 11461882 | 11462154 |
| chr11 | 11462154 | 11462408 |
| chr11 | 11492134 | 11492377 |
| chr11 | 11684967 | 11685149 |
| chr11 | 11685566 | 11685805 |
| chr11 | 11685887 | 11686156 |
| chr11 | 11686237 | 11686408 |
| chr11 | 11788476 | 11788763 |
| chr11 | 11788763 | 11789098 |
| chr11 | 11808589 | 11808885 |
| chr11 | 11808885 | 11809187 |
| chr11 | 11809187 | 11809462 |
| chr11 | 11812029 | 11812257 |
| chr11 | 11820273 | 11820772 |
| chr11 | 11820772 | 11821153 |
| chr11 | 11825506 | 11826250 |
| chr11 | 11829282 | 11829525 |
| chr11 | 11840803 | 11841103 |
| chr11 | 11939605 | 11940001 |
| chr11 | 11973438 | 11973711 |
| chr11 | 11974930 | 11975198 |
| chr11 | 12025756 | 12026120 |
| chr11 | 12026163 | 12026584 |
| chr11 | 12037108 | 12037382 |
| chr11 | 12037408 | 12037599 |
| chr11 | 12072311 | 12072717 |
| chr11 | 12195477 | 12195755 |
| chr11 | 12197530 | 12197807 |
| chr11 | 12217028 | 12217443 |
| chr11 | 12225440 | 12225592 |
| chr11 | 12231288 | 12231752 |
| chr11 | 12231752 | 12232117 |
| chr11 | 12232148 | 12232365 |

|       |          |          |
|-------|----------|----------|
| chr11 | 12232412 | 12232726 |
| chr11 | 12234980 | 12235272 |
| chr11 | 12263901 | 12264061 |
| chr11 | 12285427 | 12285689 |
| chr11 | 12285689 | 12285933 |
| chr11 | 12291475 | 12291683 |
| chr11 | 12314759 | 12314909 |
| chr11 | 12316865 | 12317022 |
| chr11 | 12319290 | 12319460 |
| chr11 | 12321035 | 12321278 |
| chr11 | 12359421 | 12359651 |
| chr11 | 12373428 | 12373716 |
| chr11 | 12373716 | 12374024 |
| chr11 | 12375068 | 12375254 |
| chr11 | 12382656 | 12382889 |
| chr11 | 12382980 | 12383527 |
| chr11 | 12384822 | 12385039 |
| chr11 | 12390681 | 12391017 |
| chr11 | 12394234 | 12394498 |
| chr11 | 12396047 | 12396640 |
| chr11 | 12402294 | 12402574 |
| chr11 | 12402958 | 12403214 |
| chr11 | 12403214 | 12403494 |
| chr11 | 12403494 | 12403789 |
| chr11 | 12405586 | 12405736 |
| chr11 | 12409447 | 12409855 |
| chr11 | 12411163 | 12411496 |
| chr11 | 12412959 | 12413293 |
| chr11 | 12416986 | 12417270 |
| chr11 | 12417270 | 12417496 |
| chr11 | 12421219 | 12421687 |
| chr11 | 12424228 | 12424630 |
| chr11 | 12434660 | 12434926 |
| chr11 | 12435028 | 12435420 |
| chr11 | 12438469 | 12438770 |
| chr11 | 12441970 | 12442288 |
| chr11 | 12442288 | 12442796 |
| chr11 | 12443082 | 12443247 |
| chr11 | 12444339 | 12444636 |
| chr11 | 12448301 | 12448512 |
| chr11 | 12448729 | 12449084 |
| chr11 | 12450748 | 12451110 |

|       |          |          |
|-------|----------|----------|
| chr11 | 12458404 | 12458786 |
| chr11 | 12463654 | 12463972 |
| chr11 | 12464045 | 12464256 |
| chr11 | 12464256 | 12464521 |
| chr11 | 12464521 | 12464880 |
| chr11 | 12464880 | 12465239 |
| chr11 | 12470934 | 12471150 |
| chr11 | 12480189 | 12480425 |
| chr11 | 12487847 | 12488010 |
| chr11 | 12495735 | 12495951 |
| chr11 | 12511248 | 12511428 |
| chr11 | 12516454 | 12516699 |
| chr11 | 12532299 | 12532734 |
| chr11 | 12540511 | 12540797 |
| chr11 | 12543214 | 12543375 |
| chr11 | 12545874 | 12546150 |
| chr11 | 12559322 | 12559565 |
| chr11 | 12957975 | 12958155 |
| chr11 | 13666784 | 13666963 |
| chr11 | 13970143 | 13970303 |
| chr11 | 15267286 | 15267474 |
| chr11 | 15376821 | 15376971 |
| chr11 | 15407556 | 15407835 |
| chr11 | 15607951 | 15608132 |
| chr11 | 16257535 | 16257714 |
| chr11 | 16257714 | 16257870 |
| chr11 | 16261299 | 16261555 |
| chr11 | 16412698 | 16412936 |
| chr11 | 16507676 | 16507996 |
| chr11 | 16507996 | 16508620 |
| chr11 | 16525049 | 16525242 |
| chr11 | 16525280 | 16525625 |
| chr11 | 16525796 | 16526300 |
| chr11 | 16526332 | 16526536 |
| chr11 | 16526536 | 16526855 |
| chr11 | 16526893 | 16527059 |
| chr11 | 16532921 | 16533236 |
| chr11 | 16537901 | 16538250 |
| chr11 | 16538250 | 16538543 |
| chr11 | 16546479 | 16546731 |
| chr11 | 16549719 | 16549949 |
| chr11 | 16558705 | 16558855 |

|       |          |          |
|-------|----------|----------|
| chr11 | 16558949 | 16559270 |
| chr11 | 16559276 | 16559755 |
| chr11 | 16560664 | 16560814 |
| chr11 | 16587129 | 16587403 |
| chr11 | 16590677 | 16590856 |
| chr11 | 16591414 | 16591952 |
| chr11 | 16591952 | 16592380 |
| chr11 | 16592598 | 16592753 |
| chr11 | 16592822 | 16593069 |
| chr11 | 16672486 | 16672803 |
| chr11 | 16683409 | 16684189 |
| chr11 | 16695674 | 16696160 |
| chr11 | 16716512 | 16717212 |
| chr11 | 16718034 | 16718485 |
| chr11 | 16720075 | 16720244 |
| chr11 | 16734845 | 16735205 |
| chr11 | 16735205 | 16735607 |
| chr11 | 16735607 | 16735880 |
| chr11 | 16737372 | 16737688 |
| chr11 | 16737912 | 16738136 |
| chr11 | 16751980 | 16752411 |
| chr11 | 16752411 | 16752717 |
| chr11 | 16752717 | 16752954 |
| chr11 | 16752954 | 16753216 |
| chr11 | 16753271 | 16753454 |
| chr11 | 16759909 | 16760396 |
| chr11 | 16769219 | 16769478 |
| chr11 | 16769744 | 16770547 |
| chr11 | 16781384 | 16781631 |
| chr11 | 16781676 | 16781918 |
| chr11 | 16783269 | 16783470 |
| chr11 | 16784023 | 16784194 |
| chr11 | 16790050 | 16790337 |
| chr11 | 16790337 | 16790606 |
| chr11 | 16790686 | 16790838 |
| chr11 | 16791147 | 16791721 |
| chr11 | 16792367 | 16792576 |
| chr11 | 16795910 | 16796254 |
| chr11 | 16796254 | 16796627 |
| chr11 | 16800533 | 16801071 |
| chr11 | 16803983 | 16804520 |
| chr11 | 16810219 | 16810422 |



|       |          |          |
|-------|----------|----------|
| chr11 | 16817235 | 16817672 |
| chr11 | 16830562 | 16830887 |
| chr11 | 16830887 | 16831147 |
| chr11 | 16833327 | 16833564 |
| chr11 | 16843886 | 16844201 |
| chr11 | 16844201 | 16844682 |
| chr11 | 16850764 | 16850961 |
| chr11 | 16850998 | 16851354 |
| chr11 | 16865045 | 16865229 |
| chr11 | 16866604 | 16866930 |
| chr11 | 16869384 | 16869811 |
| chr11 | 16871166 | 16871469 |
| chr11 | 16871609 | 16871780 |
| chr11 | 16950829 | 16951849 |
| chr11 | 16967932 | 16968090 |
| chr11 | 17158786 | 17159562 |
| chr11 | 17159562 | 17159937 |
| chr11 | 17160357 | 17160598 |
| chr11 | 17169207 | 17169464 |
| chr11 | 17172340 | 17172809 |
| chr11 | 17176657 | 17177000 |
| chr11 | 17187671 | 17187919 |
| chr11 | 17192259 | 17192409 |
| chr11 | 17203448 | 17203662 |
| chr11 | 17204808 | 17205076 |
| chr11 | 17211198 | 17211451 |
| chr11 | 17211451 | 17211735 |
| chr11 | 17211735 | 17212008 |
| chr11 | 17212008 | 17212223 |
| chr11 | 17212223 | 17212431 |
| chr11 | 17216559 | 17216736 |
| chr11 | 17221245 | 17221403 |
| chr11 | 17234411 | 17234653 |
| chr11 | 17257096 | 17257267 |
| chr11 | 17257418 | 17257889 |
| chr11 | 17257904 | 17258082 |
| chr11 | 17258082 | 17258247 |
| chr11 | 17267282 | 17267433 |
| chr11 | 17279939 | 17280164 |
| chr11 | 17311868 | 17312057 |
| chr11 | 17374904 | 17375115 |
| chr11 | 17386680 | 17387194 |

|       |          |          |
|-------|----------|----------|
| chr11 | 17459993 | 17460228 |
| chr11 | 17468483 | 17468816 |
| chr11 | 17468816 | 17469190 |
| chr11 | 17469190 | 17469658 |
| chr11 | 17486626 | 17486785 |
| chr11 | 17620630 | 17620785 |
| chr11 | 17620919 | 17621162 |
| chr11 | 17694269 | 17694457 |
| chr11 | 17953184 | 17953531 |
| chr11 | 17953531 | 17953767 |
| chr11 | 17953767 | 17954109 |
| chr11 | 18011177 | 18011327 |
| chr11 | 18070654 | 18070828 |
| chr11 | 18070958 | 18071307 |
| chr11 | 18075072 | 18075312 |
| chr11 | 18331641 | 18331951 |
| chr11 | 18331951 | 18332396 |
| chr11 | 18528586 | 18528915 |
| chr11 | 18547058 | 18547440 |
| chr11 | 18575314 | 18575657 |
| chr11 | 18575657 | 18575893 |
| chr11 | 18585273 | 18585533 |
| chr11 | 18590637 | 18590859 |
| chr11 | 18591037 | 18591224 |
| chr11 | 18632403 | 18632730 |
| chr11 | 18741969 | 18742132 |
| chr11 | 18834607 | 18834875 |
| chr11 | 18864739 | 18864985 |
| chr11 | 18877530 | 18877690 |
| chr11 | 18877705 | 18877968 |
| chr11 | 18879466 | 18879733 |
| chr11 | 18920672 | 18920946 |
| chr11 | 18927459 | 18927630 |
| chr11 | 18937817 | 18937993 |
| chr11 | 18953865 | 18954259 |
| chr11 | 18975892 | 18976331 |
| chr11 | 18989029 | 18989325 |
| chr11 | 19018859 | 19019217 |
| chr11 | 19019825 | 19020037 |
| chr11 | 19020350 | 19020626 |
| chr11 | 19024634 | 19024786 |
| chr11 | 19027367 | 19027552 |

|       |          |          |
|-------|----------|----------|
| chr11 | 19221574 | 19221757 |
| chr11 | 19302529 | 19302755 |
| chr11 | 19333503 | 19333693 |
| chr11 | 19666877 | 19667032 |
| chr11 | 19708686 | 19708861 |
| chr11 | 19728583 | 19728833 |
| chr11 | 19737534 | 19737694 |
| chr11 | 19822179 | 19822452 |
| chr11 | 19823320 | 19823470 |
| chr11 | 19823503 | 19823720 |
| chr11 | 19823720 | 19823956 |
| chr11 | 19829387 | 19829528 |
| chr11 | 19829528 | 19829693 |
| chr11 | 19829693 | 19829882 |
| chr11 | 19830720 | 19830956 |
| chr11 | 19834686 | 19834977 |
| chr11 | 19835129 | 19835486 |
| chr11 | 19835486 | 19835833 |
| chr11 | 19839085 | 19839257 |
| chr11 | 19842903 | 19843509 |
| chr11 | 19848408 | 19849030 |
| chr11 | 19849305 | 19849860 |
| chr11 | 19849860 | 19850243 |
| chr11 | 19866973 | 19867222 |
| chr11 | 19868984 | 19869179 |
| chr11 | 19911280 | 19911465 |
| chr11 | 19914760 | 19914929 |
| chr11 | 19915218 | 19915383 |
| chr11 | 19919851 | 19920124 |
| chr11 | 19920124 | 19920415 |
| chr11 | 19920415 | 19920722 |
| chr11 | 19923929 | 19924288 |
| chr11 | 19924288 | 19924563 |
| chr11 | 19925089 | 19925432 |
| chr11 | 19925432 | 19925816 |
| chr11 | 19925816 | 19926152 |
| chr11 | 19926152 | 19926385 |
| chr11 | 19929194 | 19929359 |
| chr11 | 19932917 | 19933181 |
| chr11 | 19933181 | 19933404 |
| chr11 | 19939315 | 19939488 |
| chr11 | 19939568 | 19939768 |

|       |          |          |
|-------|----------|----------|
| chr11 | 19941935 | 19942082 |
| chr11 | 19942082 | 19942220 |
| chr11 | 19947553 | 19947855 |
| chr11 | 19947855 | 19948086 |
| chr11 | 19948086 | 19948342 |
| chr11 | 19948762 | 19948947 |
| chr11 | 19960860 | 19961589 |
| chr11 | 19972578 | 19972740 |
| chr11 | 19978018 | 19978185 |
| chr11 | 19978185 | 19978369 |
| chr11 | 19979105 | 19979379 |
| chr11 | 19979379 | 19979896 |
| chr11 | 19990714 | 19991067 |
| chr11 | 19992437 | 19992686 |
| chr11 | 19992710 | 19993477 |
| chr11 | 19999987 | 20000174 |
| chr11 | 20001801 | 20002034 |
| chr11 | 20002111 | 20002288 |
| chr11 | 20009137 | 20009343 |
| chr11 | 20025999 | 20026263 |
| chr11 | 20031644 | 20031861 |
| chr11 | 20032008 | 20032272 |
| chr11 | 20032867 | 20033029 |
| chr11 | 20035434 | 20035678 |
| chr11 | 20037397 | 20037604 |
| chr11 | 20037696 | 20038123 |
| chr11 | 20043254 | 20043483 |
| chr11 | 20045807 | 20045968 |
| chr11 | 20056267 | 20056474 |
| chr11 | 20057522 | 20057730 |
| chr11 | 20066142 | 20066392 |
| chr11 | 20067630 | 20067791 |
| chr11 | 20072268 | 20072459 |
| chr11 | 20107716 | 20108003 |
| chr11 | 20112280 | 20112753 |
| chr11 | 20112753 | 20113405 |
| chr11 | 20116771 | 20117061 |
| chr11 | 20117232 | 20117391 |
| chr11 | 20117474 | 20117721 |
| chr11 | 20122779 | 20122940 |
| chr11 | 20125525 | 20125681 |
| chr11 | 20126954 | 20127708 |

|       |          |          |
|-------|----------|----------|
| chr11 | 20132986 | 20133439 |
| chr11 | 20143779 | 20144002 |
| chr11 | 20190323 | 20190503 |
| chr11 | 20200839 | 20201205 |
| chr11 | 20201205 | 20201480 |
| chr11 | 20201480 | 20201773 |
| chr11 | 20201773 | 20202076 |
| chr11 | 20204455 | 20204620 |
| chr11 | 20214851 | 20215070 |
| chr11 | 20231570 | 20231750 |
| chr11 | 20236993 | 20237452 |
| chr11 | 20237471 | 20237671 |
| chr11 | 20242449 | 20242725 |
| chr11 | 20242725 | 20243068 |
| chr11 | 20243205 | 20243486 |
| chr11 | 20246655 | 20246891 |
| chr11 | 20248878 | 20249276 |
| chr11 | 20249276 | 20249896 |
| chr11 | 20249900 | 20250051 |
| chr11 | 20253174 | 20253384 |
| chr11 | 20263104 | 20263262 |
| chr11 | 20266924 | 20267267 |
| chr11 | 20276067 | 20276217 |
| chr11 | 20282274 | 20282605 |
| chr11 | 20282605 | 20283265 |
| chr11 | 20285610 | 20285791 |
| chr11 | 20299944 | 20300233 |
| chr11 | 20301482 | 20301647 |
| chr11 | 20305538 | 20305722 |
| chr11 | 20305722 | 20305958 |
| chr11 | 20310438 | 20310808 |
| chr11 | 20310808 | 20311175 |
| chr11 | 20311175 | 20311486 |
| chr11 | 20311486 | 20311655 |
| chr11 | 20325207 | 20325475 |
| chr11 | 20326744 | 20326951 |
| chr11 | 20332055 | 20332299 |
| chr11 | 20332299 | 20332540 |
| chr11 | 20332564 | 20333089 |
| chr11 | 20333089 | 20333467 |
| chr11 | 20340825 | 20340991 |
| chr11 | 20341090 | 20341584 |

|       |          |          |
|-------|----------|----------|
| chr11 | 20346313 | 20346789 |
| chr11 | 20347532 | 20347757 |
| chr11 | 20347757 | 20348015 |
| chr11 | 20348017 | 20348259 |
| chr11 | 20348497 | 20348842 |
| chr11 | 20357633 | 20358269 |
| chr11 | 20364789 | 20364980 |
| chr11 | 20365214 | 20365466 |
| chr11 | 20369001 | 20369184 |
| chr11 | 20371220 | 20371517 |
| chr11 | 20378861 | 20379256 |
| chr11 | 20379256 | 20379594 |
| chr11 | 20400764 | 20401206 |
| chr11 | 20432016 | 20432166 |
| chr11 | 20445340 | 20445644 |
| chr11 | 20445644 | 20445962 |
| chr11 | 20445962 | 20446447 |
| chr11 | 20455042 | 20455300 |
| chr11 | 20455300 | 20455532 |
| chr11 | 20455544 | 20455810 |
| chr11 | 20456348 | 20456613 |
| chr11 | 20463149 | 20463668 |
| chr11 | 20469309 | 20469765 |
| chr11 | 20469765 | 20470039 |
| chr11 | 20470039 | 20470301 |
| chr11 | 20475719 | 20475906 |
| chr11 | 20477209 | 20478056 |
| chr11 | 20490635 | 20490823 |
| chr11 | 20492157 | 20492530 |
| chr11 | 20500609 | 20500820 |
| chr11 | 20521364 | 20521576 |
| chr11 | 20531821 | 20532243 |
| chr11 | 20532243 | 20532564 |
| chr11 | 20532564 | 20532948 |
| chr11 | 20542385 | 20542932 |
| chr11 | 20542932 | 20543279 |
| chr11 | 20543279 | 20543574 |
| chr11 | 20543574 | 20543752 |
| chr11 | 20543809 | 20544055 |
| chr11 | 20556848 | 20557062 |
| chr11 | 20558105 | 20558576 |
| chr11 | 20559628 | 20559831 |

|       |          |          |
|-------|----------|----------|
| chr11 | 20561368 | 20561547 |
| chr11 | 20564536 | 20564820 |
| chr11 | 20567302 | 20567670 |
| chr11 | 20575331 | 20575501 |
| chr11 | 20584971 | 20585268 |
| chr11 | 20585352 | 20585591 |
| chr11 | 20585886 | 20586056 |
| chr11 | 20586246 | 20586612 |
| chr11 | 20592168 | 20592320 |
| chr11 | 20594178 | 20594554 |
| chr11 | 20594554 | 20594915 |
| chr11 | 20594915 | 20595255 |
| chr11 | 20595443 | 20595761 |
| chr11 | 20599574 | 20599749 |
| chr11 | 20607824 | 20608038 |
| chr11 | 20608038 | 20608300 |
| chr11 | 20608411 | 20608767 |
| chr11 | 20609116 | 20609284 |
| chr11 | 20611109 | 20611547 |
| chr11 | 20616172 | 20616560 |
| chr11 | 20631225 | 20631668 |
| chr11 | 20631668 | 20631917 |
| chr11 | 20631917 | 20632166 |
| chr11 | 20632166 | 20632620 |
| chr11 | 20632780 | 20632930 |
| chr11 | 20638914 | 20639204 |
| chr11 | 20639905 | 20640128 |
| chr11 | 20645489 | 20645979 |
| chr11 | 20656824 | 20656998 |
| chr11 | 20661728 | 20661979 |
| chr11 | 20662960 | 20663132 |
| chr11 | 20668354 | 20668504 |
| chr11 | 20671888 | 20672165 |
| chr11 | 20674551 | 20674892 |
| chr11 | 20691076 | 20691359 |
| chr11 | 20729920 | 20730228 |
| chr11 | 20740472 | 20740750 |
| chr11 | 20740771 | 20741201 |
| chr11 | 20741201 | 20741498 |
| chr11 | 20741498 | 20741735 |
| chr11 | 20741735 | 20742056 |
| chr11 | 20742435 | 20742599 |

|       |          |          |
|-------|----------|----------|
| chr11 | 20783463 | 20783823 |
| chr11 | 20783823 | 20784130 |
| chr11 | 20794220 | 20794587 |
| chr11 | 20794632 | 20794913 |
| chr11 | 20794913 | 20795155 |
| chr11 | 20830585 | 20831135 |
| chr11 | 20831135 | 20831682 |
| chr11 | 20831887 | 20832082 |
| chr11 | 20847205 | 20847383 |
| chr11 | 20847443 | 20847634 |
| chr11 | 20856263 | 20856521 |
| chr11 | 20857302 | 20857465 |
| chr11 | 20859240 | 20859660 |
| chr11 | 20860056 | 20860213 |
| chr11 | 20869865 | 20870348 |
| chr11 | 20870348 | 20870596 |
| chr11 | 20873003 | 20873296 |
| chr11 | 20873468 | 20873719 |
| chr11 | 20877636 | 20877914 |
| chr11 | 20878575 | 20879020 |
| chr11 | 20886503 | 20886705 |
| chr11 | 20886780 | 20887614 |
| chr11 | 20896099 | 20896570 |
| chr11 | 20896570 | 20897030 |
| chr11 | 20908231 | 20908409 |
| chr11 | 20908576 | 20908802 |
| chr11 | 20909004 | 20909303 |
| chr11 | 20909531 | 20909852 |
| chr11 | 20914023 | 20914301 |
| chr11 | 20916123 | 20916339 |
| chr11 | 20916544 | 20917032 |
| chr11 | 20929057 | 20929341 |
| chr11 | 20929992 | 20930453 |
| chr11 | 20936673 | 20936869 |
| chr11 | 20936940 | 20937320 |
| chr11 | 20937716 | 20938312 |
| chr11 | 20939261 | 20939503 |
| chr11 | 20954035 | 20954214 |
| chr11 | 20955197 | 20955623 |
| chr11 | 20955623 | 20956087 |
| chr11 | 20956087 | 20956516 |
| chr11 | 20956572 | 20956839 |



|       |          |          |
|-------|----------|----------|
| chr11 | 20958519 | 20958734 |
| chr11 | 20958900 | 20959193 |
| chr11 | 20967715 | 20967939 |
| chr11 | 20968349 | 20968759 |
| chr11 | 20982130 | 20982504 |
| chr11 | 20982504 | 20983037 |
| chr11 | 20983087 | 20983246 |
| chr11 | 20987604 | 20987779 |
| chr11 | 20987842 | 20988198 |
| chr11 | 20996778 | 20997196 |
| chr11 | 21034117 | 21034397 |
| chr11 | 21036155 | 21036595 |
| chr11 | 21036600 | 21036764 |
| chr11 | 21041109 | 21041290 |
| chr11 | 21082717 | 21083113 |
| chr11 | 21083214 | 21083391 |
| chr11 | 21089678 | 21089919 |
| chr11 | 21090919 | 21091555 |
| chr11 | 21091555 | 21091960 |
| chr11 | 21105463 | 21105733 |
| chr11 | 21131796 | 21132064 |
| chr11 | 21139660 | 21139951 |
| chr11 | 21149503 | 21149823 |
| chr11 | 21150879 | 21151159 |
| chr11 | 21157545 | 21157870 |
| chr11 | 21172393 | 21172543 |
| chr11 | 21176931 | 21177087 |
| chr11 | 21191959 | 21192109 |
| chr11 | 21226150 | 21226497 |
| chr11 | 21238552 | 21239116 |
| chr11 | 21239116 | 21239449 |
| chr11 | 21239449 | 21239730 |
| chr11 | 21241269 | 21241472 |
| chr11 | 21282066 | 21282283 |
| chr11 | 21308232 | 21308427 |
| chr11 | 21326871 | 21327040 |
| chr11 | 21370375 | 21370774 |
| chr11 | 21370774 | 21371124 |
| chr11 | 21371124 | 21371486 |
| chr11 | 21398606 | 21398781 |
| chr11 | 21399461 | 21399667 |
| chr11 | 21428803 | 21429152 |

|       |          |          |
|-------|----------|----------|
| chr11 | 21453767 | 21454032 |
| chr11 | 21456562 | 21456804 |
| chr11 | 21500258 | 21500416 |
| chr11 | 21549167 | 21549358 |
| chr11 | 21549822 | 21550077 |
| chr11 | 21571507 | 21571819 |
| chr11 | 21571819 | 21572493 |
| chr11 | 21581512 | 21581844 |
| chr11 | 21869212 | 21869462 |
| chr11 | 21942382 | 21942587 |
| chr11 | 21948802 | 21949060 |
| chr11 | 21951744 | 21952000 |
| chr11 | 21992884 | 21993034 |
| chr11 | 21993399 | 21993583 |
| chr11 | 21993583 | 21993768 |
| chr11 | 21996430 | 21996722 |
| chr11 | 22001361 | 22001583 |
| chr11 | 22001583 | 22001847 |
| chr11 | 22001847 | 22002314 |
| chr11 | 22005569 | 22005719 |
| chr11 | 22008430 | 22008610 |
| chr11 | 22140307 | 22140531 |
| chr11 | 22140820 | 22141087 |
| chr11 | 22154477 | 22154844 |
| chr11 | 22154948 | 22155160 |
| chr11 | 22156150 | 22156549 |
| chr11 | 22171293 | 22171592 |
| chr11 | 22234849 | 22235073 |
| chr11 | 22247063 | 22247412 |
| chr11 | 22247833 | 22248032 |
| chr11 | 22255396 | 22255822 |
| chr11 | 22262614 | 22262778 |
| chr11 | 22270529 | 22270758 |
| chr11 | 22273335 | 22273768 |
| chr11 | 22274213 | 22274486 |
| chr11 | 22286346 | 22286628 |
| chr11 | 22286628 | 22286915 |
| chr11 | 22286915 | 22287201 |
| chr11 | 22287201 | 22287531 |
| chr11 | 22305128 | 22305359 |
| chr11 | 22313345 | 22313635 |
| chr11 | 22314372 | 22314679 |

|       |          |          |
|-------|----------|----------|
| chr11 | 22317951 | 22318379 |
| chr11 | 22334925 | 22335136 |
| chr11 | 22339224 | 22339379 |
| chr11 | 22372808 | 22372969 |
| chr11 | 22383630 | 22383974 |
| chr11 | 22383974 | 22384295 |
| chr11 | 22437343 | 22437493 |
| chr11 | 22437527 | 22437878 |
| chr11 | 22438876 | 22439122 |
| chr11 | 22440628 | 22440879 |
| chr11 | 22446685 | 22447084 |
| chr11 | 22451383 | 22452069 |
| chr11 | 22454365 | 22454544 |
| chr11 | 22462036 | 22462249 |
| chr11 | 22478741 | 22479009 |
| chr11 | 22494747 | 22494992 |
| chr11 | 22497464 | 22497984 |
| chr11 | 22506836 | 22507041 |
| chr11 | 22507041 | 22507288 |
| chr11 | 22507308 | 22507490 |
| chr11 | 22512147 | 22512995 |
| chr11 | 22517740 | 22518175 |
| chr11 | 22597616 | 22597819 |
| chr11 | 22610831 | 22611167 |
| chr11 | 22611167 | 22611514 |
| chr11 | 22611514 | 22612131 |
| chr11 | 22617448 | 22617920 |
| chr11 | 22621812 | 22622228 |
| chr11 | 22623910 | 22624060 |
| chr11 | 22629690 | 22629851 |
| chr11 | 22631841 | 22632164 |
| chr11 | 22632258 | 22632772 |
| chr11 | 22633115 | 22633297 |
| chr11 | 22638231 | 22638428 |
| chr11 | 22643915 | 22644318 |
| chr11 | 22644318 | 22644602 |
| chr11 | 22661034 | 22661547 |
| chr11 | 22662072 | 22662609 |
| chr11 | 22668260 | 22668542 |
| chr11 | 22669046 | 22669302 |
| chr11 | 22669302 | 22669787 |
| chr11 | 22672209 | 22672392 |

|       |          |          |
|-------|----------|----------|
| chr11 | 22677410 | 22677674 |
| chr11 | 22692780 | 22693061 |
| chr11 | 22693061 | 22693381 |
| chr11 | 22693381 | 22693701 |
| chr11 | 22709776 | 22709929 |
| chr11 | 22710763 | 22711007 |
| chr11 | 22711397 | 22711662 |
| chr11 | 22716112 | 22716366 |
| chr11 | 22719300 | 22719998 |
| chr11 | 22732741 | 22732970 |
| chr11 | 22732970 | 22733271 |
| chr11 | 22733305 | 22733655 |
| chr11 | 22734594 | 22734802 |
| chr11 | 22735170 | 22735433 |
| chr11 | 22777654 | 22777804 |
| chr11 | 22780775 | 22781115 |
| chr11 | 22781259 | 22781547 |
| chr11 | 22791694 | 22792159 |
| chr11 | 22792159 | 22792470 |
| chr11 | 22794790 | 22795078 |
| chr11 | 22795311 | 22795612 |
| chr11 | 22795953 | 22796160 |
| chr11 | 22799957 | 22800633 |
| chr11 | 22805227 | 22805498 |
| chr11 | 22811405 | 22811787 |
| chr11 | 22821137 | 22821616 |
| chr11 | 22830371 | 22830612 |
| chr11 | 22830612 | 22830837 |
| chr11 | 22831121 | 22831317 |
| chr11 | 22842517 | 22842781 |
| chr11 | 22843807 | 22844424 |
| chr11 | 22847733 | 22848049 |
| chr11 | 22848049 | 22848336 |
| chr11 | 22851475 | 22851660 |
| chr11 | 22854450 | 22854903 |
| chr11 | 22856642 | 22856875 |
| chr11 | 22858948 | 22859280 |
| chr11 | 22859280 | 22859618 |
| chr11 | 22859618 | 22859920 |
| chr11 | 22859920 | 22860312 |
| chr11 | 22860312 | 22860742 |
| chr11 | 22897772 | 22897983 |

|       |          |          |
|-------|----------|----------|
| chr11 | 22921255 | 22921460 |
| chr11 | 22948963 | 22949606 |
| chr11 | 22956808 | 22957254 |
| chr11 | 22965076 | 22965242 |
| chr11 | 22965438 | 22965932 |
| chr11 | 22967745 | 22968034 |
| chr11 | 22971822 | 22972130 |
| chr11 | 22972130 | 22972412 |
| chr11 | 22972412 | 22972721 |
| chr11 | 22972721 | 22973039 |
| chr11 | 22973039 | 22973261 |
| chr11 | 22973714 | 22974088 |
| chr11 | 22981672 | 22981937 |
| chr11 | 22981937 | 22982497 |
| chr11 | 22982510 | 22982660 |
| chr11 | 22990302 | 22990686 |
| chr11 | 22990686 | 22990936 |
| chr11 | 22990936 | 22991152 |
| chr11 | 23007327 | 23007606 |
| chr11 | 23007606 | 23007969 |
| chr11 | 23007979 | 23008235 |
| chr11 | 23008235 | 23008746 |
| chr11 | 23013655 | 23013895 |
| chr11 | 23052434 | 23052700 |
| chr11 | 23064686 | 23064850 |
| chr11 | 23067485 | 23068204 |
| chr11 | 23069219 | 23069443 |
| chr11 | 23074733 | 23075235 |
| chr11 | 23098138 | 23098280 |
| chr11 | 23098280 | 23098439 |
| chr11 | 23124271 | 23124508 |
| chr11 | 23124508 | 23124938 |
| chr11 | 23149865 | 23150080 |
| chr11 | 23176770 | 23176985 |
| chr11 | 23255130 | 23255760 |
| chr11 | 23255760 | 23256185 |
| chr11 | 23256197 | 23256451 |
| chr11 | 23257326 | 23257684 |
| chr11 | 23261508 | 23261808 |
| chr11 | 23272117 | 23272388 |
| chr11 | 23305729 | 23306257 |
| chr11 | 23306257 | 23306683 |

|       |          |          |
|-------|----------|----------|
| chr11 | 23306683 | 23307033 |
| chr11 | 23307033 | 23307269 |
| chr11 | 23430087 | 23430310 |
| chr11 | 23451282 | 23451612 |
| chr11 | 23451612 | 23451982 |
| chr11 | 23497424 | 23497781 |
| chr11 | 23497781 | 23498098 |
| chr11 | 23498098 | 23498470 |
| chr11 | 23504908 | 23505181 |
| chr11 | 23509555 | 23509815 |
| chr11 | 23510210 | 23510583 |
| chr11 | 23558255 | 23558405 |
| chr11 | 23565764 | 23566123 |
| chr11 | 23570176 | 23570432 |
| chr11 | 23575306 | 23575476 |
| chr11 | 23632922 | 23633390 |
| chr11 | 23633390 | 23633985 |
| chr11 | 23661051 | 23661201 |
| chr11 | 23665356 | 23665798 |
| chr11 | 23665798 | 23666186 |
| chr11 | 23666186 | 23666701 |
| chr11 | 23679110 | 23679322 |
| chr11 | 23679322 | 23679541 |
| chr11 | 23730054 | 23730727 |
| chr11 | 23730829 | 23731042 |
| chr11 | 23742779 | 23742947 |
| chr11 | 23746234 | 23746430 |
| chr11 | 23753979 | 23754282 |
| chr11 | 23754307 | 23754676 |
| chr11 | 23758600 | 23758861 |
| chr11 | 23770442 | 23770982 |
| chr11 | 23770982 | 23771264 |
| chr11 | 23771264 | 23771569 |
| chr11 | 23771589 | 23771757 |
| chr11 | 23786311 | 23786669 |
| chr11 | 23855420 | 23855727 |
| chr11 | 23894525 | 23894846 |
| chr11 | 23894846 | 23895139 |
| chr11 | 23895139 | 23895472 |
| chr11 | 23899324 | 23899693 |
| chr11 | 23913802 | 23914135 |
| chr11 | 23979403 | 23979636 |

|       |          |          |
|-------|----------|----------|
| chr11 | 24049259 | 24049558 |
| chr11 | 24076062 | 24076283 |
| chr11 | 24076283 | 24076615 |
| chr11 | 24076891 | 24077131 |
| chr11 | 24077164 | 24077387 |
| chr11 | 24077389 | 24077646 |
| chr11 | 24077895 | 24078079 |
| chr11 | 24079141 | 24079291 |
| chr11 | 24079744 | 24079942 |
| chr11 | 24080620 | 24080812 |
| chr11 | 24080812 | 24080974 |
| chr11 | 24401839 | 24402050 |
| chr11 | 24423393 | 24423637 |
| chr11 | 25321446 | 25321814 |
| chr11 | 25321883 | 25322106 |
| chr11 | 25322561 | 25322725 |
| chr11 | 25378736 | 25378952 |
| chr11 | 25792658 | 25792928 |
| chr11 | 25862858 | 25863079 |
| chr11 | 25914165 | 25914336 |
| chr11 | 26183586 | 26183839 |
| chr11 | 26183839 | 26184118 |
| chr11 | 26201069 | 26201314 |
| chr11 | 26210184 | 26210612 |
| chr11 | 26215922 | 26216118 |
| chr11 | 26386835 | 26387320 |
| chr11 | 26387320 | 26387773 |
| chr11 | 26519048 | 26519252 |
| chr11 | 26593102 | 26593476 |
| chr11 | 26593476 | 26593852 |
| chr11 | 26593852 | 26594122 |
| chr11 | 26640398 | 26640831 |
| chr11 | 26961676 | 26961917 |
| chr11 | 27126015 | 27126242 |
| chr11 | 27331115 | 27331404 |
| chr11 | 27753740 | 27753895 |
| chr11 | 28079800 | 28079952 |
| chr11 | 28339634 | 28339935 |
| chr11 | 28583703 | 28584179 |
| chr11 | 28584179 | 28584484 |
| chr11 | 28810892 | 28811126 |
| chr11 | 28811899 | 28812213 |

|       |          |          |
|-------|----------|----------|
| chr11 | 28812372 | 28812557 |
| chr11 | 28812582 | 28812984 |
| chr11 | 28812984 | 28813353 |
| chr11 | 28833777 | 28834356 |
| chr11 | 28848873 | 28849116 |
| chr11 | 28849772 | 28849958 |
| chr11 | 28849958 | 28850177 |
| chr11 | 28851773 | 28851950 |
| chr11 | 28852085 | 28852571 |
| chr11 | 28852662 | 28852819 |
| chr11 | 28853024 | 28853846 |
| chr11 | 28906098 | 28906810 |
| chr11 | 28911506 | 28911872 |
| chr11 | 28912518 | 28912809 |
| chr11 | 28925658 | 28925825 |
| chr11 | 29125623 | 29125791 |
| chr11 | 29130173 | 29130353 |
| chr11 | 29130358 | 29130605 |
| chr11 | 29130605 | 29130971 |
| chr11 | 29130971 | 29131342 |
| chr11 | 29171945 | 29172380 |
| chr11 | 29172433 | 29173112 |
| chr11 | 29173237 | 29173691 |
| chr11 | 29242067 | 29242254 |
| chr11 | 29246095 | 29246374 |
| chr11 | 29246795 | 29247240 |
| chr11 | 29247240 | 29247640 |
| chr11 | 29267941 | 29268164 |
| chr11 | 29344939 | 29345288 |
| chr11 | 29345659 | 29346178 |
| chr11 | 29346473 | 29346658 |
| chr11 | 29349349 | 29349500 |
| chr11 | 29363202 | 29363404 |
| chr11 | 29373265 | 29373900 |
| chr11 | 29373900 | 29374216 |
| chr11 | 29374216 | 29374404 |
| chr11 | 29428862 | 29429064 |
| chr11 | 29474717 | 29474991 |
| chr11 | 29475707 | 29475946 |
| chr11 | 29476054 | 29476328 |
| chr11 | 29514621 | 29514910 |
| chr11 | 29514910 | 29515195 |



|       |          |          |
|-------|----------|----------|
| chr11 | 29515195 | 29515451 |
| chr11 | 29526034 | 29526524 |
| chr11 | 29526524 | 29526784 |
| chr11 | 29547565 | 29548046 |
| chr11 | 29548046 | 29548564 |
| chr11 | 29604130 | 29604567 |
| chr11 | 29605117 | 29605416 |
| chr11 | 29607518 | 29607737 |
| chr11 | 29628660 | 29628938 |
| chr11 | 29638789 | 29639168 |
| chr11 | 29645429 | 29645957 |
| chr11 | 29653536 | 29653739 |
| chr11 | 29656723 | 29657046 |
| chr11 | 29676853 | 29677008 |
| chr11 | 29679755 | 29680258 |
| chr11 | 29684926 | 29685128 |
| chr11 | 29685820 | 29685970 |
| chr11 | 29691983 | 29692411 |
| chr11 | 29692553 | 29693314 |
| chr11 | 29693484 | 29693882 |
| chr11 | 29693882 | 29694121 |
| chr11 | 29694158 | 29694353 |
| chr11 | 29704600 | 29704847 |
| chr11 | 29705011 | 29705197 |
| chr11 | 29705210 | 29705618 |
| chr11 | 29705618 | 29705955 |
| chr11 | 29709649 | 29709799 |
| chr11 | 29724260 | 29724505 |
| chr11 | 29725693 | 29725895 |
| chr11 | 29727967 | 29728250 |
| chr11 | 29735166 | 29735364 |
| chr11 | 29737235 | 29737437 |
| chr11 | 29737869 | 29738104 |
| chr11 | 29739695 | 29740048 |
| chr11 | 29752326 | 29752488 |
| chr11 | 29755177 | 29755402 |
| chr11 | 29758365 | 29758536 |
| chr11 | 29758579 | 29758933 |
| chr11 | 29759943 | 29760181 |
| chr11 | 29761632 | 29761830 |
| chr11 | 29761935 | 29762103 |
| chr11 | 29770650 | 29771241 |

|       |          |          |
|-------|----------|----------|
| chr11 | 29772419 | 29772650 |
| chr11 | 29777983 | 29778356 |
| chr11 | 29782779 | 29782929 |
| chr11 | 29783235 | 29783389 |
| chr11 | 29801718 | 29802037 |
| chr11 | 29802157 | 29802325 |
| chr11 | 29807430 | 29807626 |
| chr11 | 29810404 | 29810604 |
| chr11 | 29824645 | 29825479 |
| chr11 | 29837123 | 29837350 |
| chr11 | 29838902 | 29839127 |
| chr11 | 29839781 | 29840253 |
| chr11 | 29862085 | 29862318 |
| chr11 | 29879679 | 29880055 |
| chr11 | 29884086 | 29884392 |
| chr11 | 29884392 | 29884759 |
| chr11 | 29885195 | 29885505 |
| chr11 | 29903278 | 29903458 |
| chr11 | 29904105 | 29904271 |
| chr11 | 30025644 | 30026487 |
| chr11 | 30057392 | 30057604 |
| chr11 | 30092035 | 30092213 |
| chr11 | 30095331 | 30095486 |
| chr11 | 30095486 | 30095660 |
| chr11 | 30096038 | 30096275 |
| chr11 | 30102714 | 30102947 |
| chr11 | 30118030 | 30118507 |
| chr11 | 30130644 | 30130802 |
| chr11 | 30133451 | 30133650 |
| chr11 | 30161027 | 30161365 |
| chr11 | 30161365 | 30161651 |
| chr11 | 30181257 | 30181523 |
| chr11 | 30182722 | 30183115 |
| chr11 | 30183115 | 30183366 |
| chr11 | 30183366 | 30183646 |
| chr11 | 30184600 | 30184909 |
| chr11 | 30189026 | 30189176 |
| chr11 | 30197502 | 30197784 |
| chr11 | 30197784 | 30198132 |
| chr11 | 30198132 | 30198439 |
| chr11 | 30198439 | 30198769 |
| chr11 | 30209525 | 30209988 |

|       |          |          |
|-------|----------|----------|
| chr11 | 30210284 | 30210665 |
| chr11 | 30211618 | 30212042 |
| chr11 | 30212057 | 30212246 |
| chr11 | 30222273 | 30222655 |
| chr11 | 30222683 | 30222959 |
| chr11 | 30238025 | 30238250 |
| chr11 | 30243331 | 30243625 |
| chr11 | 30243625 | 30244042 |
| chr11 | 30247139 | 30247557 |
| chr11 | 30265592 | 30266052 |
| chr11 | 30266846 | 30267398 |
| chr11 | 30267398 | 30267760 |
| chr11 | 30267760 | 30268009 |
| chr11 | 30268009 | 30268269 |
| chr11 | 30268269 | 30268581 |
| chr11 | 30268650 | 30268876 |
| chr11 | 30269655 | 30269855 |
| chr11 | 30394442 | 30394674 |
| chr11 | 30471681 | 30472255 |
| chr11 | 30485732 | 30485887 |
| chr11 | 30648970 | 30649296 |
| chr11 | 30649296 | 30649630 |
| chr11 | 30657164 | 30657409 |
| chr11 | 30676160 | 30676474 |
| chr11 | 30744014 | 30744203 |
| chr11 | 30750097 | 30750486 |
| chr11 | 30750486 | 30750786 |
| chr11 | 30754781 | 30755542 |
| chr11 | 30771375 | 30772083 |
| chr11 | 30772083 | 30772593 |
| chr11 | 30773146 | 30773322 |
| chr11 | 30799592 | 30799817 |
| chr11 | 30800147 | 30800468 |
| chr11 | 30885195 | 30885805 |
| chr11 | 30933362 | 30933552 |
| chr11 | 30933800 | 30934041 |
| chr11 | 30953553 | 30953808 |
| chr11 | 30953826 | 30954234 |
| chr11 | 30954234 | 30954622 |
| chr11 | 30954622 | 30954930 |
| chr11 | 30985840 | 30986173 |
| chr11 | 30986173 | 30986619 |

|       |          |          |
|-------|----------|----------|
| chr11 | 30986619 | 30986981 |
| chr11 | 30996720 | 30997216 |
| chr11 | 31138056 | 31138236 |
| chr11 | 31157048 | 31157341 |
| chr11 | 31169563 | 31169740 |
| chr11 | 31170084 | 31170312 |
| chr11 | 31225302 | 31225774 |
| chr11 | 31230566 | 31230873 |
| chr11 | 31237463 | 31237665 |
| chr11 | 31248552 | 31248782 |
| chr11 | 31369277 | 31369870 |
| chr11 | 31369974 | 31370491 |
| chr11 | 31371525 | 31371656 |
| chr11 | 31371656 | 31371733 |
| chr11 | 31373523 | 31373799 |
| chr11 | 31382288 | 31382480 |
| chr11 | 31564191 | 31564349 |
| chr11 | 31617324 | 31617537 |
| chr11 | 31638052 | 31638339 |
| chr11 | 31649640 | 31649845 |
| chr11 | 31656502 | 31656703 |
| chr11 | 31656703 | 31656922 |
| chr11 | 31657089 | 31657702 |
| chr11 | 31657702 | 31658117 |
| chr11 | 31658126 | 31658370 |
| chr11 | 31663200 | 31663500 |
| chr11 | 31664205 | 31664629 |
| chr11 | 31664894 | 31665106 |
| chr11 | 31665192 | 31665371 |
| chr11 | 31670373 | 31670667 |
| chr11 | 31671302 | 31671711 |
| chr11 | 31671711 | 31672162 |
| chr11 | 31681757 | 31681937 |
| chr11 | 31683747 | 31683972 |
| chr11 | 31690783 | 31690935 |
| chr11 | 31713620 | 31714012 |
| chr11 | 31718255 | 31718632 |
| chr11 | 31719816 | 31719966 |
| chr11 | 31727078 | 31727737 |
| chr11 | 31728823 | 31729057 |
| chr11 | 31733118 | 31733319 |
| chr11 | 31736200 | 31736484 |

|       |          |          |
|-------|----------|----------|
| chr11 | 31736639 | 31737069 |
| chr11 | 31738110 | 31738306 |
| chr11 | 31739873 | 31740055 |
| chr11 | 31740166 | 31740795 |
| chr11 | 31745906 | 31746152 |
| chr11 | 31748005 | 31748165 |
| chr11 | 31748358 | 31748812 |
| chr11 | 31750746 | 31750984 |
| chr11 | 31751327 | 31751542 |
| chr11 | 31753745 | 31753938 |
| chr11 | 31753938 | 31754134 |
| chr11 | 31772054 | 31772370 |
| chr11 | 31782560 | 31782734 |
| chr11 | 31786594 | 31786826 |
| chr11 | 31796218 | 31796637 |
| chr11 | 31798135 | 31798496 |
| chr11 | 31807418 | 31807753 |
| chr11 | 31807753 | 31808136 |
| chr11 | 31808136 | 31808504 |
| chr11 | 31808504 | 31808967 |
| chr11 | 31810080 | 31810267 |
| chr11 | 31821975 | 31822486 |
| chr11 | 31822545 | 31822835 |
| chr11 | 31822910 | 31823139 |
| chr11 | 31823139 | 31823412 |
| chr11 | 31824497 | 31825259 |
| chr11 | 31828746 | 31829030 |
| chr11 | 31832530 | 31832735 |
| chr11 | 31833179 | 31833537 |
| chr11 | 31839516 | 31839683 |
| chr11 | 31845203 | 31845746 |
| chr11 | 31851047 | 31851438 |
| chr11 | 31868090 | 31868341 |
| chr11 | 31868587 | 31868799 |
| chr11 | 31870291 | 31870561 |
| chr11 | 31870600 | 31871034 |
| chr11 | 31871355 | 31871543 |
| chr11 | 31900530 | 31900774 |
| chr11 | 31906186 | 31906364 |
| chr11 | 31914311 | 31914477 |
| chr11 | 31914477 | 31914633 |
| chr11 | 31917672 | 31917877 |

|       |          |          |
|-------|----------|----------|
| chr11 | 31922522 | 31922931 |
| chr11 | 31945603 | 31945794 |
| chr11 | 31948627 | 31949145 |
| chr11 | 31949145 | 31949479 |
| chr11 | 31949479 | 31949732 |
| chr11 | 31989857 | 31990213 |
| chr11 | 32000257 | 32000633 |
| chr11 | 32020004 | 32020210 |
| chr11 | 32039186 | 32039544 |
| chr11 | 32039713 | 32039914 |
| chr11 | 32103054 | 32103261 |
| chr11 | 32104826 | 32105035 |
| chr11 | 32138372 | 32138544 |
| chr11 | 32141087 | 32141344 |
| chr11 | 32150077 | 32150262 |
| chr11 | 32161534 | 32161869 |
| chr11 | 32162063 | 32162517 |
| chr11 | 32165185 | 32165461 |
| chr11 | 32170475 | 32170625 |
| chr11 | 32182542 | 32182740 |
| chr11 | 32194164 | 32194332 |
| chr11 | 32195215 | 32195441 |
| chr11 | 32196837 | 32196987 |
| chr11 | 32199286 | 32199466 |
| chr11 | 32204990 | 32205750 |
| chr11 | 32210682 | 32210905 |
| chr11 | 32210905 | 32211136 |
| chr11 | 32216988 | 32217182 |
| chr11 | 32220753 | 32220920 |
| chr11 | 32220933 | 32221362 |
| chr11 | 32221362 | 32221743 |
| chr11 | 32221761 | 32222085 |
| chr11 | 32222164 | 32222458 |
| chr11 | 32224893 | 32225056 |
| chr11 | 32226325 | 32226624 |
| chr11 | 32226624 | 32226857 |
| chr11 | 32237073 | 32237366 |
| chr11 | 32238343 | 32238832 |
| chr11 | 32250844 | 32251306 |
| chr11 | 32251306 | 32251820 |
| chr11 | 32261589 | 32261928 |
| chr11 | 32261945 | 32262156 |

|       |          |          |
|-------|----------|----------|
| chr11 | 32262156 | 32262445 |
| chr11 | 32262659 | 32263150 |
| chr11 | 32263241 | 32263493 |
| chr11 | 32265169 | 32265374 |
| chr11 | 32265480 | 32265666 |
| chr11 | 32267259 | 32267532 |
| chr11 | 32267532 | 32267834 |
| chr11 | 32267950 | 32268219 |
| chr11 | 32281592 | 32281826 |
| chr11 | 32283483 | 32283721 |
| chr11 | 32286797 | 32287153 |
| chr11 | 32287153 | 32287454 |
| chr11 | 32292890 | 32293186 |
| chr11 | 32295024 | 32295261 |
| chr11 | 32296310 | 32296540 |
| chr11 | 32299924 | 32300205 |
| chr11 | 32320558 | 32320794 |
| chr11 | 32320871 | 32321171 |
| chr11 | 32321171 | 32321520 |
| chr11 | 32324590 | 32324970 |
| chr11 | 32335969 | 32336125 |
| chr11 | 32341194 | 32341344 |
| chr11 | 32343464 | 32343645 |
| chr11 | 32345160 | 32345515 |
| chr11 | 32345515 | 32345894 |
| chr11 | 32345894 | 32346242 |
| chr11 | 32346242 | 32346567 |
| chr11 | 32347630 | 32347951 |
| chr11 | 32352840 | 32353016 |
| chr11 | 32355359 | 32355701 |
| chr11 | 32357604 | 32358144 |
| chr11 | 32358405 | 32358742 |
| chr11 | 32359603 | 32359934 |
| chr11 | 32363247 | 32363558 |
| chr11 | 32363558 | 32363858 |
| chr11 | 32363858 | 32364204 |
| chr11 | 32375058 | 32375286 |
| chr11 | 32375286 | 32375577 |
| chr11 | 32387320 | 32387470 |
| chr11 | 32398430 | 32398683 |
| chr11 | 32404500 | 32405260 |
| chr11 | 32429273 | 32429491 |

|       |          |          |
|-------|----------|----------|
| chr11 | 32429491 | 32429735 |
| chr11 | 32435435 | 32435758 |
| chr11 | 32435758 | 32436089 |
| chr11 | 32437440 | 32437755 |
| chr11 | 32442183 | 32442333 |
| chr11 | 32450279 | 32450431 |
| chr11 | 32454554 | 32454721 |
| chr11 | 32454721 | 32454929 |
| chr11 | 32454929 | 32455223 |
| chr11 | 32455223 | 32455680 |
| chr11 | 32455680 | 32456099 |
| chr11 | 32461266 | 32461416 |
| chr11 | 32461956 | 32462125 |
| chr11 | 32464381 | 32464763 |
| chr11 | 32485385 | 32485590 |
| chr11 | 32489101 | 32489415 |
| chr11 | 32489415 | 32489659 |
| chr11 | 32502700 | 32503000 |
| chr11 | 32532738 | 32533041 |
| chr11 | 32533041 | 32533408 |
| chr11 | 32533408 | 32533811 |
| chr11 | 32533811 | 32534305 |
| chr11 | 32542005 | 32542223 |
| chr11 | 32542223 | 32542456 |
| chr11 | 32542704 | 32543013 |
| chr11 | 32552509 | 32552969 |
| chr11 | 32552969 | 32553254 |
| chr11 | 32553767 | 32554114 |
| chr11 | 32554114 | 32554390 |
| chr11 | 32558015 | 32558503 |
| chr11 | 32561544 | 32561741 |
| chr11 | 32563626 | 32564145 |
| chr11 | 32564848 | 32565004 |
| chr11 | 32565060 | 32565322 |
| chr11 | 32566950 | 32567131 |
| chr11 | 32567395 | 32567786 |
| chr11 | 32571995 | 32572220 |
| chr11 | 32579624 | 32579835 |
| chr11 | 32579835 | 32580039 |
| chr11 | 32585148 | 32585488 |
| chr11 | 32587307 | 32587575 |
| chr11 | 32587911 | 32588318 |



|       |          |          |
|-------|----------|----------|
| chr11 | 32588449 | 32588688 |
| chr11 | 32592485 | 32592867 |
| chr11 | 32601917 | 32602156 |
| chr11 | 32604842 | 32605021 |
| chr11 | 32605061 | 32605387 |
| chr11 | 32605387 | 32605892 |
| chr11 | 32605927 | 32606159 |
| chr11 | 32612406 | 32612649 |
| chr11 | 32614676 | 32614875 |
| chr11 | 32618753 | 32618912 |
| chr11 | 32619078 | 32619250 |
| chr11 | 32619250 | 32619406 |
| chr11 | 32619418 | 32619613 |
| chr11 | 32625751 | 32626021 |
| chr11 | 32634288 | 32634450 |
| chr11 | 32635104 | 32635277 |
| chr11 | 32642101 | 32642601 |
| chr11 | 32642601 | 32642908 |
| chr11 | 32642908 | 32643273 |
| chr11 | 32643279 | 32643454 |
| chr11 | 32644119 | 32644290 |
| chr11 | 32647312 | 32647549 |
| chr11 | 32647549 | 32647775 |
| chr11 | 32650423 | 32650714 |
| chr11 | 32661690 | 32662047 |
| chr11 | 32662154 | 32662359 |
| chr11 | 32662372 | 32662628 |
| chr11 | 32665782 | 32665943 |
| chr11 | 32667110 | 32667295 |
| chr11 | 32672271 | 32672435 |
| chr11 | 32676241 | 32676520 |
| chr11 | 32676783 | 32677086 |
| chr11 | 32677839 | 32678124 |
| chr11 | 32678214 | 32678364 |
| chr11 | 32680044 | 32680327 |
| chr11 | 32689581 | 32689990 |
| chr11 | 32691971 | 32692199 |
| chr11 | 32693576 | 32694130 |
| chr11 | 32696542 | 32696741 |
| chr11 | 32699806 | 32700013 |
| chr11 | 32700013 | 32700226 |
| chr11 | 32705093 | 32705571 |

|       |          |          |
|-------|----------|----------|
| chr11 | 32706157 | 32706380 |
| chr11 | 32706609 | 32706970 |
| chr11 | 32714297 | 32714536 |
| chr11 | 32725551 | 32725701 |
| chr11 | 32725824 | 32726058 |
| chr11 | 32726071 | 32726393 |
| chr11 | 32726393 | 32726673 |
| chr11 | 32726673 | 32726977 |
| chr11 | 32751716 | 32751892 |
| chr11 | 32752324 | 32752544 |
| chr11 | 32752544 | 32752818 |
| chr11 | 32762281 | 32762723 |
| chr11 | 32762723 | 32762976 |
| chr11 | 32762976 | 32763313 |
| chr11 | 32766167 | 32766539 |
| chr11 | 32771107 | 32771376 |
| chr11 | 32781185 | 32781676 |
| chr11 | 32781680 | 32781882 |
| chr11 | 32782764 | 32782971 |
| chr11 | 32787617 | 32787778 |
| chr11 | 32799811 | 32800053 |
| chr11 | 32801138 | 32801288 |
| chr11 | 32802936 | 32803161 |
| chr11 | 32805964 | 32806284 |
| chr11 | 32809169 | 32809473 |
| chr11 | 32842657 | 32843146 |
| chr11 | 32843832 | 32844026 |
| chr11 | 32889425 | 32889596 |
| chr11 | 32905477 | 32905679 |
| chr11 | 32925636 | 32926079 |
| chr11 | 32957049 | 32957308 |
| chr11 | 32965442 | 32965671 |
| chr11 | 32999330 | 32999507 |
| chr11 | 33001390 | 33001540 |
| chr11 | 33029007 | 33029225 |
| chr11 | 33070947 | 33071291 |
| chr11 | 33087988 | 33088363 |
| chr11 | 33088363 | 33088638 |
| chr11 | 33097920 | 33098140 |
| chr11 | 33100075 | 33100331 |
| chr11 | 33100331 | 33100601 |
| chr11 | 33122624 | 33123104 |

|       |          |          |
|-------|----------|----------|
| chr11 | 33129266 | 33129693 |
| chr11 | 33134654 | 33134819 |
| chr11 | 33142706 | 33143265 |
| chr11 | 33146759 | 33146955 |
| chr11 | 33147147 | 33147580 |
| chr11 | 33147580 | 33147900 |
| chr11 | 33147900 | 33148158 |
| chr11 | 33148158 | 33148432 |
| chr11 | 33148432 | 33148721 |
| chr11 | 33150517 | 33150761 |
| chr11 | 33162019 | 33162265 |
| chr11 | 33162265 | 33162555 |
| chr11 | 33162555 | 33162915 |
| chr11 | 33162915 | 33163608 |
| chr11 | 33170589 | 33170830 |
| chr11 | 33176644 | 33176877 |
| chr11 | 33177333 | 33177517 |
| chr11 | 33186070 | 33186290 |
| chr11 | 33201104 | 33201282 |
| chr11 | 33201289 | 33201657 |
| chr11 | 33202547 | 33202724 |
| chr11 | 33202947 | 33203103 |
| chr11 | 33203103 | 33203388 |
| chr11 | 33203388 | 33203812 |
| chr11 | 33205074 | 33205326 |
| chr11 | 33217790 | 33217965 |
| chr11 | 33265826 | 33266000 |
| chr11 | 33278696 | 33278846 |
| chr11 | 33296448 | 33296772 |
| chr11 | 33427830 | 33428146 |
| chr11 | 33512795 | 33513151 |
| chr11 | 33513151 | 33513396 |
| chr11 | 33513396 | 33513628 |
| chr11 | 33513628 | 33513898 |
| chr11 | 33541385 | 33541787 |
| chr11 | 33570506 | 33570730 |
| chr11 | 33579546 | 33579847 |
| chr11 | 33579847 | 33580037 |
| chr11 | 33581857 | 33582203 |
| chr11 | 33586960 | 33587463 |
| chr11 | 33587937 | 33588141 |
| chr11 | 33589823 | 33590071 |

|       |          |          |
|-------|----------|----------|
| chr11 | 33590933 | 33591248 |
| chr11 | 33594529 | 33594763 |
| chr11 | 33599659 | 33600104 |
| chr11 | 33601280 | 33601826 |
| chr11 | 33602156 | 33602567 |
| chr11 | 33602774 | 33603013 |
| chr11 | 33614234 | 33614585 |
| chr11 | 33623578 | 33623762 |
| chr11 | 33649469 | 33649681 |
| chr11 | 33660006 | 33660550 |
| chr11 | 33660550 | 33660878 |
| chr11 | 33664910 | 33665233 |
| chr11 | 33680236 | 33680407 |
| chr11 | 33700760 | 33700896 |
| chr11 | 33700896 | 33701035 |
| chr11 | 33707304 | 33707454 |
| chr11 | 33721382 | 33721630 |
| chr11 | 33725682 | 33725935 |
| chr11 | 33744349 | 33744960 |
| chr11 | 33754789 | 33755114 |
| chr11 | 33767573 | 33767847 |
| chr11 | 33843513 | 33843709 |
| chr11 | 33860761 | 33861213 |
| chr11 | 33861213 | 33861509 |
| chr11 | 33882766 | 33883036 |
| chr11 | 33917662 | 33917897 |
| chr11 | 33928775 | 33928953 |
| chr11 | 33931915 | 33932079 |
| chr11 | 33932079 | 33932221 |
| chr11 | 34009915 | 34010224 |
| chr11 | 34030104 | 34030367 |
| chr11 | 34036386 | 34036658 |
| chr11 | 34098558 | 34098710 |
| chr11 | 34223185 | 34223480 |
| chr11 | 34229059 | 34229216 |
| chr11 | 34314612 | 34314819 |
| chr11 | 34525534 | 34525810 |
| chr11 | 34791959 | 34792126 |
| chr11 | 34812949 | 34813125 |
| chr11 | 34832792 | 34833039 |
| chr11 | 34833268 | 34833800 |
| chr11 | 34833800 | 34834085 |

|       |          |          |
|-------|----------|----------|
| chr11 | 34836371 | 34836583 |
| chr11 | 34899291 | 34899802 |
| chr11 | 35065840 | 35066403 |
| chr11 | 35082418 | 35082687 |
| chr11 | 35083094 | 35083341 |
| chr11 | 35086051 | 35086254 |
| chr11 | 35094014 | 35094218 |
| chr11 | 35094639 | 35094791 |
| chr11 | 35119471 | 35119703 |
| chr11 | 35121065 | 35121231 |
| chr11 | 35296257 | 35296407 |
| chr11 | 35407738 | 35407893 |
| chr11 | 35451647 | 35451936 |
| chr11 | 35517860 | 35518078 |
| chr11 | 35537521 | 35537851 |
| chr11 | 35571960 | 35572153 |
| chr11 | 35587118 | 35587492 |
| chr11 | 35589918 | 35590273 |
| chr11 | 35665061 | 35665224 |
| chr11 | 35667483 | 35667728 |
| chr11 | 35668025 | 35668436 |
| chr11 | 35690428 | 35690580 |
| chr11 | 35693168 | 35693484 |
| chr11 | 35695177 | 35695343 |
| chr11 | 35731916 | 35732414 |
| chr11 | 35746075 | 35746383 |
| chr11 | 35755367 | 35755574 |
| chr11 | 35755700 | 35755907 |
| chr11 | 35769182 | 35769644 |
| chr11 | 35769644 | 35769938 |
| chr11 | 35769938 | 35770184 |
| chr11 | 35775678 | 35775941 |
| chr11 | 35776444 | 35776846 |
| chr11 | 35797977 | 35798197 |
| chr11 | 35798961 | 35799212 |
| chr11 | 35803113 | 35803316 |
| chr11 | 35804125 | 35804350 |
| chr11 | 35806245 | 35806445 |
| chr11 | 35806957 | 35807143 |
| chr11 | 35811556 | 35811713 |
| chr11 | 35813466 | 35813659 |
| chr11 | 35816396 | 35816649 |

|       |          |          |
|-------|----------|----------|
| chr11 | 35818320 | 35818471 |
| chr11 | 35832257 | 35832511 |
| chr11 | 35834135 | 35834355 |
| chr11 | 35834355 | 35834737 |
| chr11 | 35837713 | 35838231 |
| chr11 | 35838384 | 35838772 |
| chr11 | 35839000 | 35839285 |
| chr11 | 35844306 | 35844906 |
| chr11 | 35852815 | 35853077 |
| chr11 | 35853715 | 35853952 |
| chr11 | 35857969 | 35858164 |
| chr11 | 35860072 | 35860264 |
| chr11 | 35868780 | 35869201 |
| chr11 | 35869328 | 35869483 |
| chr11 | 35877590 | 35877975 |
| chr11 | 35877975 | 35878253 |
| chr11 | 35878253 | 35878540 |
| chr11 | 35878540 | 35878836 |
| chr11 | 35890343 | 35890544 |
| chr11 | 35891914 | 35892128 |
| chr11 | 35894483 | 35894682 |
| chr11 | 35908820 | 35909044 |
| chr11 | 35915122 | 35915425 |
| chr11 | 35915425 | 35915791 |
| chr11 | 35915791 | 35916092 |
| chr11 | 35919979 | 35920189 |
| chr11 | 35921316 | 35921593 |
| chr11 | 35921766 | 35922102 |
| chr11 | 35922102 | 35922458 |
| chr11 | 35925438 | 35925965 |
| chr11 | 35926246 | 35926485 |
| chr11 | 35926485 | 35926687 |
| chr11 | 35932588 | 35933166 |
| chr11 | 35933443 | 35933697 |
| chr11 | 35933697 | 35933981 |
| chr11 | 35933981 | 35934199 |
| chr11 | 35940579 | 35940947 |
| chr11 | 35941785 | 35941999 |
| chr11 | 35942564 | 35942802 |
| chr11 | 35942915 | 35943163 |
| chr11 | 35945186 | 35945615 |
| chr11 | 35948317 | 35948979 |

|       |          |          |
|-------|----------|----------|
| chr11 | 35950544 | 35950998 |
| chr11 | 35950998 | 35951291 |
| chr11 | 35955591 | 35956053 |
| chr11 | 35961957 | 35962508 |
| chr11 | 35963600 | 35963961 |
| chr11 | 35970416 | 35970661 |
| chr11 | 35970706 | 35971242 |
| chr11 | 35971242 | 35971594 |
| chr11 | 35971594 | 35971882 |
| chr11 | 35977458 | 35977691 |
| chr11 | 35979093 | 35979279 |
| chr11 | 35979843 | 35980148 |
| chr11 | 35980257 | 35980813 |
| chr11 | 35982640 | 35983241 |
| chr11 | 35985817 | 35986126 |
| chr11 | 35986126 | 35986421 |
| chr11 | 35995389 | 35995653 |
| chr11 | 35997954 | 35998401 |
| chr11 | 36000998 | 36001285 |
| chr11 | 36001285 | 36001695 |
| chr11 | 36002062 | 36002232 |
| chr11 | 36013219 | 36013538 |
| chr11 | 36015054 | 36015206 |
| chr11 | 36019998 | 36020293 |
| chr11 | 36031074 | 36031230 |
| chr11 | 36034419 | 36034632 |
| chr11 | 36036168 | 36036873 |
| chr11 | 36045687 | 36045960 |
| chr11 | 36045960 | 36046197 |
| chr11 | 36046613 | 36046958 |
| chr11 | 36106550 | 36106702 |
| chr11 | 36140520 | 36140687 |
| chr11 | 36173376 | 36173535 |
| chr11 | 36221304 | 36221565 |
| chr11 | 36390358 | 36390674 |
| chr11 | 36526487 | 36526639 |
| chr11 | 37674001 | 37674160 |
| chr11 | 38010705 | 38010875 |
| chr11 | 38117743 | 38118121 |
| chr11 | 38118121 | 38118428 |
| chr11 | 38122580 | 38122730 |
| chr11 | 38140812 | 38141030 |

|       |          |          |
|-------|----------|----------|
| chr11 | 38147005 | 38147155 |
| chr11 | 38297737 | 38297979 |
| chr11 | 38509751 | 38509995 |
| chr11 | 38781130 | 38781436 |
| chr11 | 40023687 | 40023898 |
| chr11 | 40300047 | 40300198 |
| chr11 | 40366630 | 40366899 |
| chr11 | 40401989 | 40402269 |
| chr11 | 40402269 | 40402577 |
| chr11 | 40402577 | 40402924 |
| chr11 | 40407439 | 40407665 |
| chr11 | 40407665 | 40407976 |
| chr11 | 40426369 | 40426598 |
| chr11 | 40428843 | 40429365 |
| chr11 | 40429439 | 40429728 |
| chr11 | 40446883 | 40447281 |
| chr11 | 40455063 | 40455392 |
| chr11 | 40469388 | 40469659 |
| chr11 | 40487541 | 40487812 |
| chr11 | 40505575 | 40506039 |
| chr11 | 40552143 | 40552423 |
| chr11 | 40552555 | 40553134 |
| chr11 | 40556671 | 40557042 |
| chr11 | 40560100 | 40560550 |
| chr11 | 40564392 | 40564708 |
| chr11 | 40566278 | 40566448 |
| chr11 | 40566678 | 40567065 |
| chr11 | 40568636 | 40568895 |
| chr11 | 40592008 | 40592463 |
| chr11 | 40600239 | 40600406 |
| chr11 | 40600499 | 40600680 |
| chr11 | 40677301 | 40677451 |
| chr11 | 40692114 | 40692305 |
| chr11 | 40692305 | 40692551 |
| chr11 | 40692551 | 40692881 |
| chr11 | 40692963 | 40693244 |
| chr11 | 40693417 | 40693845 |
| chr11 | 40694835 | 40695000 |
| chr11 | 40718322 | 40718472 |
| chr11 | 40733057 | 40733369 |
| chr11 | 40733369 | 40733741 |
| chr11 | 40733741 | 40734005 |



|       |          |          |
|-------|----------|----------|
| chr11 | 40734005 | 40734303 |
| chr11 | 40741521 | 40741853 |
| chr11 | 40741853 | 40742321 |
| chr11 | 40747591 | 40747960 |
| chr11 | 40754524 | 40754820 |
| chr11 | 40754820 | 40755160 |
| chr11 | 40755160 | 40755566 |
| chr11 | 40763456 | 40763738 |
| chr11 | 40789079 | 40789263 |
| chr11 | 40789844 | 40790094 |
| chr11 | 40790168 | 40790615 |
| chr11 | 40790615 | 40790897 |
| chr11 | 40803107 | 40803423 |
| chr11 | 40900872 | 40901129 |
| chr11 | 40901186 | 40901393 |
| chr11 | 40901481 | 40901631 |
| chr11 | 40927248 | 40927424 |
| chr11 | 41144625 | 41144828 |
| chr11 | 41256093 | 41256292 |
| chr11 | 41340142 | 41340403 |
| chr11 | 41340403 | 41340824 |
| chr11 | 41341079 | 41341388 |
| chr11 | 41341772 | 41342016 |
| chr11 | 41354641 | 41354854 |
| chr11 | 41359312 | 41359505 |
| chr11 | 41632554 | 41632812 |
| chr11 | 42793312 | 42793659 |
| chr11 | 42905626 | 42905938 |
| chr11 | 42906012 | 42906373 |
| chr11 | 42939308 | 42939714 |
| chr11 | 42944440 | 42945002 |
| chr11 | 42999261 | 42999420 |
| chr11 | 43023126 | 43023515 |
| chr11 | 43023515 | 43023923 |
| chr11 | 43024855 | 43025060 |
| chr11 | 43050473 | 43050730 |
| chr11 | 43075558 | 43075720 |
| chr11 | 43125591 | 43126064 |
| chr11 | 43126064 | 43126510 |
| chr11 | 43126647 | 43126909 |
| chr11 | 43141323 | 43141520 |
| chr11 | 43144087 | 43144624 |

|       |          |          |
|-------|----------|----------|
| chr11 | 43155498 | 43155771 |
| chr11 | 43174502 | 43174740 |
| chr11 | 43174816 | 43174972 |
| chr11 | 43182866 | 43183198 |
| chr11 | 43183579 | 43183881 |
| chr11 | 43186385 | 43186750 |
| chr11 | 43187372 | 43187598 |
| chr11 | 43263926 | 43264159 |
| chr11 | 43344767 | 43345140 |
| chr11 | 43373421 | 43373859 |
| chr11 | 43385064 | 43385396 |
| chr11 | 43385396 | 43385670 |
| chr11 | 43398310 | 43398464 |
| chr11 | 43411515 | 43411767 |
| chr11 | 43412835 | 43413085 |
| chr11 | 43425923 | 43426421 |
| chr11 | 43426505 | 43426666 |
| chr11 | 43433645 | 43433864 |
| chr11 | 43433864 | 43434083 |
| chr11 | 43434083 | 43434334 |
| chr11 | 43447358 | 43447508 |
| chr11 | 43455053 | 43455392 |
| chr11 | 43461927 | 43462180 |
| chr11 | 43474187 | 43474491 |
| chr11 | 43474491 | 43474737 |
| chr11 | 43492671 | 43493000 |
| chr11 | 43493965 | 43494312 |
| chr11 | 43495649 | 43495943 |
| chr11 | 43499586 | 43499880 |
| chr11 | 43500378 | 43500597 |
| chr11 | 43503904 | 43504066 |
| chr11 | 43504204 | 43504366 |
| chr11 | 43512836 | 43513071 |
| chr11 | 43528672 | 43528930 |
| chr11 | 43528930 | 43529130 |
| chr11 | 43529130 | 43529320 |
| chr11 | 43529320 | 43529515 |
| chr11 | 43531756 | 43531911 |
| chr11 | 43551818 | 43552116 |
| chr11 | 43586430 | 43586650 |
| chr11 | 43602460 | 43602615 |
| chr11 | 43613170 | 43613418 |

|       |          |          |
|-------|----------|----------|
| chr11 | 43624383 | 43624610 |
| chr11 | 43642874 | 43643141 |
| chr11 | 43643141 | 43643627 |
| chr11 | 43644633 | 43644785 |
| chr11 | 43653264 | 43653490 |
| chr11 | 43658115 | 43658295 |
| chr11 | 43681534 | 43682048 |
| chr11 | 43682048 | 43682368 |
| chr11 | 43682368 | 43682581 |
| chr11 | 43682581 | 43682813 |
| chr11 | 43703634 | 43703936 |
| chr11 | 43729121 | 43729370 |
| chr11 | 43747437 | 43747865 |
| chr11 | 43747865 | 43748228 |
| chr11 | 43766858 | 43767146 |
| chr11 | 43767146 | 43767499 |
| chr11 | 43776066 | 43776340 |
| chr11 | 43783801 | 43784046 |
| chr11 | 43820625 | 43820812 |
| chr11 | 43835909 | 43836138 |
| chr11 | 43836153 | 43836440 |
| chr11 | 43836440 | 43836717 |
| chr11 | 43836717 | 43836992 |
| chr11 | 43844930 | 43845084 |
| chr11 | 43853120 | 43853285 |
| chr11 | 43889215 | 43889840 |
| chr11 | 43892700 | 43892987 |
| chr11 | 43894741 | 43895203 |
| chr11 | 43895382 | 43895729 |
| chr11 | 43895878 | 43896145 |
| chr11 | 43901318 | 43901645 |
| chr11 | 43910131 | 43910520 |
| chr11 | 43910520 | 43910984 |
| chr11 | 43910984 | 43911299 |
| chr11 | 43919472 | 43919862 |
| chr11 | 43919862 | 43920338 |
| chr11 | 43926253 | 43926504 |
| chr11 | 43926506 | 43926680 |
| chr11 | 43927152 | 43927404 |
| chr11 | 43929195 | 43929553 |
| chr11 | 43932737 | 43932941 |
| chr11 | 43933061 | 43933442 |

|       |          |          |
|-------|----------|----------|
| chr11 | 43933445 | 43933962 |
| chr11 | 43940423 | 43940645 |
| chr11 | 43940645 | 43940875 |
| chr11 | 43958299 | 43958556 |
| chr11 | 43958573 | 43958883 |
| chr11 | 43959001 | 43959203 |
| chr11 | 43960805 | 43960991 |
| chr11 | 43987244 | 43987503 |
| chr11 | 43993394 | 43993598 |
| chr11 | 43997663 | 43998065 |
| chr11 | 43998065 | 43998380 |
| chr11 | 43998380 | 43998694 |
| chr11 | 43999299 | 43999493 |
| chr11 | 44001866 | 44002181 |
| chr11 | 44002240 | 44002521 |
| chr11 | 44049214 | 44049613 |
| chr11 | 44049613 | 44049950 |
| chr11 | 44065823 | 44066026 |
| chr11 | 44066166 | 44066492 |
| chr11 | 44066690 | 44066957 |
| chr11 | 44076947 | 44077097 |
| chr11 | 44085019 | 44085245 |
| chr11 | 44156096 | 44156424 |
| chr11 | 44164006 | 44164586 |
| chr11 | 44179770 | 44180141 |
| chr11 | 44180989 | 44181184 |
| chr11 | 44211838 | 44212072 |
| chr11 | 44216344 | 44216810 |
| chr11 | 44216943 | 44217189 |
| chr11 | 44303890 | 44304158 |
| chr11 | 44323035 | 44323326 |
| chr11 | 44323326 | 44323738 |
| chr11 | 44325613 | 44325883 |
| chr11 | 44325883 | 44326077 |
| chr11 | 44331529 | 44331762 |
| chr11 | 44367197 | 44367428 |
| chr11 | 44390162 | 44390541 |
| chr11 | 44398844 | 44399036 |
| chr11 | 44399036 | 44399278 |
| chr11 | 44417391 | 44417710 |
| chr11 | 44417728 | 44417882 |
| chr11 | 44427643 | 44427899 |

|       |          |          |
|-------|----------|----------|
| chr11 | 44428049 | 44428287 |
| chr11 | 44428724 | 44429068 |
| chr11 | 44453481 | 44453888 |
| chr11 | 44462704 | 44462870 |
| chr11 | 44469557 | 44469881 |
| chr11 | 44469881 | 44470142 |
| chr11 | 44470142 | 44470395 |
| chr11 | 44470395 | 44470744 |
| chr11 | 44470744 | 44471043 |
| chr11 | 44471137 | 44471318 |
| chr11 | 44495623 | 44496000 |
| chr11 | 44504309 | 44504584 |
| chr11 | 44518496 | 44518836 |
| chr11 | 44518836 | 44519140 |
| chr11 | 44519140 | 44519429 |
| chr11 | 44519429 | 44519689 |
| chr11 | 44519689 | 44519987 |
| chr11 | 44519987 | 44520363 |
| chr11 | 44520365 | 44520745 |
| chr11 | 44525804 | 44526012 |
| chr11 | 44541917 | 44542072 |
| chr11 | 44543639 | 44543898 |
| chr11 | 44551090 | 44551293 |
| chr11 | 44581454 | 44581708 |
| chr11 | 44586175 | 44586326 |
| chr11 | 44601169 | 44601327 |
| chr11 | 44606916 | 44607217 |
| chr11 | 44610930 | 44611185 |
| chr11 | 44611203 | 44611567 |
| chr11 | 44616866 | 44617410 |
| chr11 | 44618197 | 44618558 |
| chr11 | 44624666 | 44624866 |
| chr11 | 44636711 | 44636873 |
| chr11 | 44637144 | 44637429 |
| chr11 | 44717749 | 44717940 |
| chr11 | 44724102 | 44724377 |
| chr11 | 44725838 | 44726137 |
| chr11 | 44729910 | 44730302 |
| chr11 | 44730321 | 44730508 |
| chr11 | 44767961 | 44768247 |
| chr11 | 44772362 | 44772547 |
| chr11 | 44773094 | 44773259 |

|       |          |          |
|-------|----------|----------|
| chr11 | 44779042 | 44779232 |
| chr11 | 44780637 | 44781024 |
| chr11 | 44787223 | 44787397 |
| chr11 | 44811888 | 44812077 |
| chr11 | 44812384 | 44812779 |
| chr11 | 44902230 | 44902529 |
| chr11 | 44908394 | 44908719 |
| chr11 | 44916514 | 44916664 |
| chr11 | 44943798 | 44944115 |
| chr11 | 44944393 | 44944715 |
| chr11 | 44944766 | 44944953 |
| chr11 | 44945577 | 44945798 |
| chr11 | 44948466 | 44948955 |
| chr11 | 44949174 | 44949474 |
| chr11 | 44951253 | 44951446 |
| chr11 | 44951476 | 44951981 |
| chr11 | 45008181 | 45008436 |
| chr11 | 45012122 | 45012456 |
| chr11 | 45017205 | 45017441 |
| chr11 | 45045284 | 45045532 |
| chr11 | 45087222 | 45087439 |
| chr11 | 45271377 | 45271571 |
| chr11 | 45678775 | 45678935 |
| chr11 | 45752283 | 45752537 |
| chr11 | 45789153 | 45789479 |
| chr11 | 45795745 | 45795986 |
| chr11 | 45805191 | 45805540 |
| chr11 | 45805540 | 45805868 |
| chr11 | 45829087 | 45829288 |
| chr11 | 45831674 | 45832092 |
| chr11 | 45849341 | 45849515 |
| chr11 | 45851645 | 45852122 |
| chr11 | 45852122 | 45852481 |
| chr11 | 45852481 | 45852773 |
| chr11 | 45881156 | 45881336 |
| chr11 | 45883338 | 45883628 |
| chr11 | 45883628 | 45883898 |
| chr11 | 45884169 | 45884415 |
| chr11 | 45916997 | 45917152 |
| chr11 | 45926513 | 45926864 |
| chr11 | 45926864 | 45927149 |
| chr11 | 45927393 | 45927710 |

|       |          |          |
|-------|----------|----------|
| chr11 | 45943855 | 45944073 |
| chr11 | 45944147 | 45944575 |
| chr11 | 45944575 | 45944922 |
| chr11 | 45944922 | 45945224 |
| chr11 | 45955071 | 45955373 |
| chr11 | 45955373 | 45955683 |
| chr11 | 45960143 | 45960300 |
| chr11 | 45980062 | 45980235 |
| chr11 | 45980320 | 45980596 |
| chr11 | 45980596 | 45980869 |
| chr11 | 46052178 | 46052384 |
| chr11 | 46052384 | 46052564 |
| chr11 | 46055868 | 46056462 |
| chr11 | 46056573 | 46056723 |
| chr11 | 46058009 | 46058335 |
| chr11 | 46063340 | 46063625 |
| chr11 | 46065399 | 46065656 |
| chr11 | 46065656 | 46066091 |
| chr11 | 46072567 | 46072736 |
| chr11 | 46072914 | 46073139 |
| chr11 | 46073452 | 46073643 |
| chr11 | 46080068 | 46080310 |
| chr11 | 46080333 | 46080751 |
| chr11 | 46101889 | 46102476 |
| chr11 | 46115732 | 46116046 |
| chr11 | 46116635 | 46116791 |
| chr11 | 46119829 | 46120020 |
| chr11 | 46120793 | 46121017 |
| chr11 | 46122479 | 46123043 |
| chr11 | 46128634 | 46128867 |
| chr11 | 46160635 | 46161088 |
| chr11 | 46161237 | 46161408 |
| chr11 | 46164353 | 46164715 |
| chr11 | 46165921 | 46166234 |
| chr11 | 46166234 | 46166708 |
| chr11 | 46177687 | 46178070 |
| chr11 | 46215417 | 46215691 |
| chr11 | 46215691 | 46215837 |
| chr11 | 46245958 | 46246325 |
| chr11 | 46252067 | 46252303 |
| chr11 | 46269040 | 46269265 |
| chr11 | 46275394 | 46275672 |

|       |          |          |
|-------|----------|----------|
| chr11 | 46276889 | 46277061 |
| chr11 | 46311682 | 46311882 |
| chr11 | 46311882 | 46312172 |
| chr11 | 46312172 | 46312565 |
| chr11 | 46312565 | 46312899 |
| chr11 | 46326551 | 46326842 |
| chr11 | 46424763 | 46424981 |
| chr11 | 46431224 | 46431514 |
| chr11 | 46436720 | 46437471 |
| chr11 | 46437477 | 46437656 |
| chr11 | 46454474 | 46455037 |
| chr11 | 46461419 | 46461629 |
| chr11 | 46461955 | 46462340 |
| chr11 | 46466802 | 46467331 |
| chr11 | 46488363 | 46488515 |
| chr11 | 46504290 | 46504494 |
| chr11 | 46573393 | 46573563 |
| chr11 | 46631771 | 46631942 |
| chr11 | 46666225 | 46666432 |
| chr11 | 46693344 | 46693689 |
| chr11 | 46700358 | 46700508 |
| chr11 | 46746002 | 46746415 |
| chr11 | 47149726 | 47149876 |
| chr11 | 47190852 | 47191074 |
| chr11 | 47805052 | 47805418 |
| chr11 | 47810438 | 47810588 |
| chr11 | 47823552 | 47823711 |
| chr11 | 47823727 | 47824262 |
| chr11 | 47833340 | 47833636 |
| chr11 | 47900591 | 47900808 |
| chr11 | 47900808 | 47901029 |
| chr11 | 47902612 | 47902867 |
| chr11 | 47905599 | 47906039 |
| chr11 | 47916615 | 47916874 |
| chr11 | 47966579 | 47966742 |
| chr11 | 47988372 | 47988524 |
| chr11 | 47988711 | 47989008 |
| chr11 | 48097557 | 48097787 |
| chr11 | 48097822 | 48098128 |
| chr11 | 48098128 | 48098415 |
| chr11 | 48133184 | 48133422 |
| chr11 | 48133422 | 48133784 |



|       |          |          |
|-------|----------|----------|
| chr11 | 48588914 | 48589121 |
| chr11 | 48698975 | 48699127 |
| chr11 | 48699131 | 48699564 |
| chr11 | 48699613 | 48699844 |
| chr11 | 48699976 | 48700136 |
| chr11 | 48748322 | 48748482 |
| chr11 | 48774574 | 48774750 |
| chr11 | 48774789 | 48775198 |
| chr11 | 48775553 | 48775816 |
| chr11 | 48775957 | 48776258 |
| chr11 | 48776722 | 48776965 |
| chr11 | 48779563 | 48779717 |
| chr11 | 48783050 | 48783257 |
| chr11 | 48785932 | 48786146 |
| chr11 | 48787898 | 48788080 |
| chr11 | 48788326 | 48788476 |
| chr11 | 48788545 | 48788704 |
| chr11 | 48788707 | 48789051 |
| chr11 | 48790284 | 48790543 |
| chr11 | 48799627 | 48799918 |
| chr11 | 48799918 | 48800183 |
| chr11 | 48800183 | 48800450 |
| chr11 | 48800450 | 48800849 |
| chr11 | 48801184 | 48801391 |
| chr11 | 48806888 | 48807234 |
| chr11 | 48807234 | 48807577 |
| chr11 | 48807577 | 48808156 |
| chr11 | 48808289 | 48808448 |
| chr11 | 48808471 | 48808690 |
| chr11 | 48808690 | 48808825 |
| chr11 | 48808999 | 48809237 |
| chr11 | 48809951 | 48810101 |
| chr11 | 48816551 | 48816741 |
| chr11 | 48816823 | 48817222 |
| chr11 | 48817222 | 48817685 |
| chr11 | 48818338 | 48818656 |
| chr11 | 48819726 | 48820154 |
| chr11 | 48820443 | 48820623 |
| chr11 | 48822804 | 48823135 |
| chr11 | 48823695 | 48823971 |
| chr11 | 48825932 | 48826188 |
| chr11 | 48826188 | 48826465 |

|       |          |          |
|-------|----------|----------|
| chr11 | 48826465 | 48826763 |
| chr11 | 48826871 | 48827042 |
| chr11 | 48833742 | 48834028 |
| chr11 | 48834150 | 48834639 |
| chr11 | 48837112 | 48837330 |
| chr11 | 48837330 | 48837594 |
| chr11 | 48837594 | 48837872 |
| chr11 | 48837872 | 48838147 |
| chr11 | 48838188 | 48838615 |
| chr11 | 48844296 | 48844520 |
| chr11 | 48845487 | 48845709 |
| chr11 | 48846424 | 48846632 |
| chr11 | 48846702 | 48846852 |
| chr11 | 48852372 | 48852557 |
| chr11 | 48853563 | 48853806 |
| chr11 | 48853850 | 48854139 |
| chr11 | 48855528 | 48855778 |
| chr11 | 48855888 | 48856103 |
| chr11 | 48856217 | 48856493 |
| chr11 | 48856493 | 48856773 |
| chr11 | 48856773 | 48857180 |
| chr11 | 48858122 | 48858302 |
| chr11 | 48869863 | 48870018 |
| chr11 | 48871301 | 48871619 |
| chr11 | 48871619 | 48871991 |
| chr11 | 48872015 | 48872526 |
| chr11 | 48873433 | 48873590 |
| chr11 | 48873617 | 48873817 |
| chr11 | 48873873 | 48874039 |
| chr11 | 48874589 | 48874765 |
| chr11 | 48898886 | 48899550 |
| chr11 | 48914426 | 48914741 |
| chr11 | 48933977 | 48934275 |
| chr11 | 48934992 | 48935199 |
| chr11 | 48935233 | 48935649 |
| chr11 | 48935649 | 48935969 |
| chr11 | 48974351 | 48974725 |
| chr11 | 48974725 | 48975057 |
| chr11 | 48975110 | 48975280 |
| chr11 | 48979343 | 48979706 |
| chr11 | 48979706 | 48980047 |
| chr11 | 48980099 | 48980350 |

|       |          |          |
|-------|----------|----------|
| chr11 | 48984466 | 48984686 |
| chr11 | 49006778 | 49007180 |
| chr11 | 49008111 | 49008527 |
| chr11 | 49008650 | 49008840 |
| chr11 | 49046198 | 49046569 |
| chr11 | 49046569 | 49046904 |
| chr11 | 49046928 | 49047109 |
| chr11 | 49050837 | 49050992 |
| chr11 | 49051187 | 49051543 |
| chr11 | 49051543 | 49051893 |
| chr11 | 49051958 | 49052196 |
| chr11 | 49056329 | 49056565 |
| chr11 | 49060077 | 49060348 |
| chr11 | 49083278 | 49083460 |
| chr11 | 49084370 | 49084594 |
| chr11 | 49084738 | 49085233 |
| chr11 | 49087053 | 49087432 |
| chr11 | 49087900 | 49088127 |
| chr11 | 49088293 | 49088627 |
| chr11 | 49090235 | 49090460 |
| chr11 | 49092151 | 49092375 |
| chr11 | 49098914 | 49099068 |
| chr11 | 49103141 | 49103379 |
| chr11 | 49103379 | 49103648 |
| chr11 | 49104381 | 49104538 |
| chr11 | 49108171 | 49108448 |
| chr11 | 49108882 | 49109061 |
| chr11 | 49109061 | 49109240 |
| chr11 | 49124252 | 49124513 |
| chr11 | 49189767 | 49190055 |
| chr11 | 49191088 | 49191556 |
| chr11 | 49192976 | 49193149 |
| chr11 | 49198007 | 49198243 |
| chr11 | 49203108 | 49203847 |
| chr11 | 49203862 | 49204350 |
| chr11 | 49215010 | 49215207 |
| chr11 | 49235586 | 49235792 |
| chr11 | 49243686 | 49243936 |
| chr11 | 49243936 | 49244174 |
| chr11 | 49244174 | 49244632 |
| chr11 | 49245312 | 49245523 |
| chr11 | 49248754 | 49248943 |

|       |          |          |
|-------|----------|----------|
| chr11 | 49249189 | 49249415 |
| chr11 | 49250360 | 49250685 |
| chr11 | 49250685 | 49251094 |
| chr11 | 49260396 | 49261007 |
| chr11 | 49261007 | 49261432 |
| chr11 | 49264757 | 49265119 |
| chr11 | 49268000 | 49268295 |
| chr11 | 49268295 | 49268527 |
| chr11 | 49271369 | 49271624 |
| chr11 | 49273584 | 49273921 |
| chr11 | 49295905 | 49296202 |
| chr11 | 49308564 | 49308774 |
| chr11 | 49337088 | 49337456 |
| chr11 | 49381835 | 49382213 |
| chr11 | 49406035 | 49406316 |
| chr11 | 49410623 | 49410855 |
| chr11 | 49428845 | 49429112 |
| chr11 | 49439263 | 49439660 |
| chr11 | 49493634 | 49493789 |
| chr11 | 49497750 | 49498016 |
| chr11 | 49513961 | 49514159 |
| chr11 | 49523987 | 49524305 |
| chr11 | 49531377 | 49531918 |
| chr11 | 49532792 | 49533119 |
| chr11 | 49536700 | 49536959 |
| chr11 | 49554082 | 49554335 |
| chr11 | 49577857 | 49578226 |
| chr11 | 49578340 | 49578816 |
| chr11 | 49590029 | 49590298 |
| chr11 | 49595749 | 49596035 |
| chr11 | 49597237 | 49597479 |
| chr11 | 49603147 | 49603297 |
| chr11 | 49609176 | 49609352 |
| chr11 | 49609391 | 49609964 |
| chr11 | 49609964 | 49610453 |
| chr11 | 49611395 | 49611568 |
| chr11 | 49612223 | 49612450 |
| chr11 | 49616233 | 49617138 |
| chr11 | 49624212 | 49624446 |
| chr11 | 49626021 | 49626127 |
| chr11 | 49626127 | 49626249 |
| chr11 | 49628638 | 49628865 |

|       |          |          |
|-------|----------|----------|
| chr11 | 49631227 | 49631477 |
| chr11 | 49632689 | 49632887 |
| chr11 | 49633114 | 49633301 |
| chr11 | 49635543 | 49636035 |
| chr11 | 49650526 | 49650704 |
| chr11 | 49651532 | 49651780 |
| chr11 | 49652802 | 49653066 |
| chr11 | 49653066 | 49653315 |
| chr11 | 49658178 | 49658397 |
| chr11 | 49663052 | 49663316 |
| chr11 | 49664463 | 49664633 |
| chr11 | 49695049 | 49695317 |
| chr11 | 49703023 | 49703291 |
| chr11 | 49703426 | 49703768 |
| chr11 | 49711941 | 49712288 |
| chr11 | 49712288 | 49712627 |
| chr11 | 49712627 | 49713053 |
| chr11 | 49713239 | 49713544 |
| chr11 | 49727939 | 49728177 |
| chr11 | 49739089 | 49739300 |
| chr11 | 49739865 | 49740076 |
| chr11 | 49746691 | 49747109 |
| chr11 | 49755297 | 49755535 |
| chr11 | 49766665 | 49767156 |
| chr11 | 49792792 | 49792942 |
| chr11 | 49793174 | 49793402 |
| chr11 | 49793965 | 49794378 |
| chr11 | 49811060 | 49811573 |
| chr11 | 49824971 | 49825225 |
| chr11 | 49829267 | 49829661 |
| chr11 | 49829663 | 49829972 |
| chr11 | 49833963 | 49834153 |
| chr11 | 49846312 | 49846927 |
| chr11 | 49846927 | 49847305 |
| chr11 | 49869806 | 49870098 |
| chr11 | 49871941 | 49872195 |
| chr11 | 49874732 | 49875062 |
| chr11 | 49877628 | 49877810 |
| chr11 | 49879989 | 49880229 |
| chr11 | 49901637 | 49902308 |
| chr11 | 49903421 | 49903661 |
| chr11 | 49913242 | 49913392 |

|       |          |          |
|-------|----------|----------|
| chr11 | 49945217 | 49945578 |
| chr11 | 49955680 | 49955854 |
| chr11 | 49955907 | 49956355 |
| chr11 | 49961371 | 49961719 |
| chr11 | 49979731 | 49979899 |
| chr11 | 49980596 | 49981143 |
| chr11 | 49981207 | 49981693 |
| chr11 | 49986266 | 49986520 |
| chr11 | 49986713 | 49986974 |
| chr11 | 49997280 | 49997737 |
| chr11 | 50017720 | 50017905 |
| chr11 | 50024802 | 50025094 |
| chr11 | 50025094 | 50025343 |
| chr11 | 50025343 | 50025840 |
| chr11 | 50076869 | 50077020 |
| chr11 | 50099829 | 50099997 |
| chr11 | 50113469 | 50113919 |
| chr11 | 50113919 | 50114292 |
| chr11 | 50114409 | 50114786 |
| chr11 | 50130449 | 50130795 |
| chr11 | 50130795 | 50131110 |
| chr11 | 50131110 | 50131802 |
| chr11 | 50138448 | 50138839 |
| chr11 | 50145610 | 50145965 |
| chr11 | 50155837 | 50156254 |
| chr11 | 50161443 | 50161602 |
| chr11 | 50161619 | 50161867 |
| chr11 | 50161867 | 50162044 |
| chr11 | 50167090 | 50167335 |
| chr11 | 50174387 | 50174561 |
| chr11 | 50174576 | 50174949 |
| chr11 | 50174949 | 50175170 |
| chr11 | 50175170 | 50175365 |
| chr11 | 50188842 | 50189097 |
| chr11 | 50193612 | 50193809 |
| chr11 | 50195297 | 50195476 |
| chr11 | 50196909 | 50197355 |
| chr11 | 50197355 | 50197599 |
| chr11 | 50197599 | 50197912 |
| chr11 | 50198088 | 50198662 |
| chr11 | 50198814 | 50199093 |
| chr11 | 50199093 | 50199366 |

|       |          |          |
|-------|----------|----------|
| chr11 | 50199499 | 50199650 |
| chr11 | 50200718 | 50200877 |
| chr11 | 50203530 | 50203783 |
| chr11 | 50204771 | 50205133 |
| chr11 | 50210046 | 50210385 |
| chr11 | 50210385 | 50210658 |
| chr11 | 50210658 | 50210864 |
| chr11 | 50210981 | 50211180 |
| chr11 | 50211959 | 50212305 |
| chr11 | 50212811 | 50213072 |
| chr11 | 50213072 | 50213374 |
| chr11 | 50213374 | 50213769 |
| chr11 | 50219115 | 50219314 |
| chr11 | 50222642 | 50222803 |
| chr11 | 50224592 | 50224918 |
| chr11 | 50224918 | 50225166 |
| chr11 | 50225166 | 50225578 |
| chr11 | 50225608 | 50225998 |
| chr11 | 50225998 | 50226193 |
| chr11 | 50229277 | 50229485 |
| chr11 | 50230999 | 50231411 |
| chr11 | 50231457 | 50231710 |
| chr11 | 50235171 | 50235710 |
| chr11 | 50236543 | 50236806 |
| chr11 | 50236806 | 50237113 |
| chr11 | 50237113 | 50237445 |
| chr11 | 50237445 | 50237671 |
| chr11 | 50237942 | 50238173 |
| chr11 | 50238494 | 50238644 |
| chr11 | 50244548 | 50244783 |
| chr11 | 50251589 | 50251825 |
| chr11 | 50251825 | 50252024 |
| chr11 | 50252093 | 50252447 |
| chr11 | 50252447 | 50252729 |
| chr11 | 50252729 | 50253060 |
| chr11 | 50262091 | 50262344 |
| chr11 | 50267028 | 50267368 |
| chr11 | 50267439 | 50267814 |
| chr11 | 50269244 | 50269453 |
| chr11 | 50274814 | 50274999 |
| chr11 | 50275378 | 50275893 |
| chr11 | 50275893 | 50276230 |

|       |          |          |
|-------|----------|----------|
| chr11 | 50291536 | 50291889 |
| chr11 | 50291889 | 50292262 |
| chr11 | 50292262 | 50292623 |
| chr11 | 50292623 | 50292887 |
| chr11 | 50300944 | 50301124 |
| chr11 | 50319408 | 50319628 |
| chr11 | 50325106 | 50325572 |
| chr11 | 50325572 | 50326227 |
| chr11 | 50357626 | 50357811 |
| chr11 | 50358192 | 50358416 |
| chr11 | 50359007 | 50359276 |
| chr11 | 50359276 | 50359493 |
| chr11 | 50359548 | 50359828 |
| chr11 | 50363934 | 50364226 |
| chr11 | 50364468 | 50364642 |
| chr11 | 50364642 | 50364889 |
| chr11 | 50366919 | 50367157 |
| chr11 | 50369335 | 50369686 |
| chr11 | 50371439 | 50371629 |
| chr11 | 50371658 | 50371820 |
| chr11 | 50376836 | 50377095 |
| chr11 | 50377095 | 50377412 |
| chr11 | 50377412 | 50377705 |
| chr11 | 50377705 | 50377894 |
| chr11 | 50377894 | 50378104 |
| chr11 | 50378104 | 50378355 |
| chr11 | 50378355 | 50378653 |
| chr11 | 50386691 | 50387048 |
| chr11 | 50387063 | 50387284 |
| chr11 | 50387284 | 50387580 |
| chr11 | 50387588 | 50387753 |
| chr11 | 50387882 | 50388321 |
| chr11 | 50388321 | 50388628 |
| chr11 | 50389749 | 50389929 |
| chr11 | 50391527 | 50391835 |
| chr11 | 50391835 | 50392010 |
| chr11 | 50407058 | 50407215 |
| chr11 | 50416672 | 50416822 |
| chr11 | 50421904 | 50422270 |
| chr11 | 50430318 | 50430557 |
| chr11 | 50430557 | 50430778 |
| chr11 | 50430778 | 50430984 |



|       |          |          |
|-------|----------|----------|
| chr11 | 50430984 | 50431250 |
| chr11 | 50431469 | 50431684 |
| chr11 | 50431806 | 50431967 |
| chr11 | 50432002 | 50432436 |
| chr11 | 50432854 | 50433326 |
| chr11 | 50433341 | 50433553 |
| chr11 | 50439535 | 50439792 |
| chr11 | 50439792 | 50440324 |
| chr11 | 50441694 | 50442019 |
| chr11 | 50448276 | 50448427 |
| chr11 | 50459300 | 50459508 |
| chr11 | 50465083 | 50465248 |
| chr11 | 50483473 | 50483671 |
| chr11 | 50559110 | 50559379 |
| chr11 | 50559414 | 50559656 |
| chr11 | 50565516 | 50565769 |
| chr11 | 50565769 | 50566187 |
| chr11 | 50587122 | 50587344 |
| chr11 | 50587790 | 50588106 |
| chr11 | 50589148 | 50589298 |
| chr11 | 50601618 | 50601792 |
| chr11 | 50601798 | 50602291 |
| chr11 | 50603195 | 50603439 |
| chr11 | 50622296 | 50622531 |
| chr11 | 50632431 | 50632647 |
| chr11 | 50664934 | 50665185 |
| chr11 | 50672907 | 50673303 |
| chr11 | 50674359 | 50675028 |
| chr11 | 50683868 | 50684069 |
| chr11 | 50712291 | 50712608 |
| chr11 | 50713258 | 50713426 |
| chr11 | 50713682 | 50713928 |
| chr11 | 50720482 | 50720670 |
| chr11 | 50737199 | 50737364 |
| chr11 | 50766090 | 50766311 |
| chr11 | 50767100 | 50767319 |
| chr11 | 50769192 | 50769484 |
| chr11 | 50769484 | 50769809 |
| chr11 | 50827040 | 50827220 |
| chr11 | 50827339 | 50827515 |
| chr11 | 50827649 | 50828049 |
| chr11 | 50841466 | 50841712 |

|       |          |          |
|-------|----------|----------|
| chr11 | 50851158 | 50851467 |
| chr11 | 50915638 | 50915845 |
| chr11 | 50915845 | 50916060 |
| chr11 | 50916060 | 50916396 |
| chr11 | 50929462 | 50929782 |
| chr11 | 50931143 | 50931342 |
| chr11 | 50931391 | 50931931 |
| chr11 | 50932217 | 50932417 |
| chr11 | 50932556 | 50932791 |
| chr11 | 50939970 | 50940244 |
| chr11 | 50951262 | 50951412 |
| chr11 | 50952353 | 50952655 |
| chr11 | 50963175 | 50963356 |
| chr11 | 51012844 | 51013063 |
| chr11 | 51013063 | 51013305 |
| chr11 | 51031136 | 51031287 |
| chr11 | 51054583 | 51054791 |
| chr11 | 51059093 | 51059365 |
| chr11 | 51059365 | 51059743 |
| chr11 | 51059749 | 51059939 |
| chr11 | 51063364 | 51063536 |
| chr11 | 51064132 | 51064531 |
| chr11 | 51164922 | 51165126 |
| chr11 | 51165504 | 51165774 |
| chr11 | 51182728 | 51182955 |
| chr11 | 51184278 | 51184456 |
| chr11 | 51198458 | 51198652 |
| chr11 | 51206298 | 51206586 |
| chr11 | 51207784 | 51208336 |
| chr11 | 51208398 | 51208572 |
| chr11 | 51262660 | 51262936 |
| chr11 | 51262936 | 51263284 |
| chr11 | 51263287 | 51263528 |
| chr11 | 51263528 | 51263813 |
| chr11 | 51264301 | 51264793 |
| chr11 | 51265487 | 51265649 |
| chr11 | 51287447 | 51287602 |
| chr11 | 51289515 | 51289756 |
| chr11 | 51289756 | 51290090 |
| chr11 | 51290090 | 51290465 |
| chr11 | 51353873 | 51354111 |
| chr11 | 51401826 | 51402082 |

|       |          |          |
|-------|----------|----------|
| chr11 | 51404891 | 51405257 |
| chr11 | 51422105 | 51422280 |
| chr11 | 51431371 | 51431661 |
| chr11 | 51447109 | 51447307 |
| chr11 | 51455576 | 51455883 |
| chr11 | 51485002 | 51485211 |
| chr11 | 51513057 | 51513331 |
| chr11 | 51527499 | 51527675 |
| chr11 | 51534393 | 51534543 |
| chr11 | 51539231 | 51539601 |
| chr11 | 51539606 | 51540024 |
| chr11 | 51540051 | 51540205 |
| chr11 | 51546864 | 51547019 |
| chr11 | 51551273 | 51551534 |
| chr11 | 51551624 | 51551774 |
| chr11 | 51555717 | 51555867 |
| chr11 | 51565124 | 51565274 |
| chr11 | 51571988 | 51572140 |
| chr11 | 51575820 | 51575970 |
| chr11 | 51581439 | 51581631 |
| chr11 | 51582887 | 51583053 |
| chr11 | 51584060 | 51584306 |
| chr11 | 51584326 | 51584831 |
| chr11 | 51584831 | 51585260 |
| chr11 | 51585503 | 51585750 |
| chr11 | 51585750 | 51585941 |
| chr11 | 51591383 | 51591542 |
| chr11 | 51592124 | 51592291 |
| chr11 | 51593522 | 51593734 |
| chr11 | 51593821 | 51594013 |
| chr11 | 51594013 | 51594186 |
| chr11 | 51594186 | 51594358 |
| chr11 | 51594926 | 51595312 |
| chr11 | 51595312 | 51595598 |
| chr11 | 51598277 | 51598432 |
| chr11 | 51605839 | 51606215 |
| chr11 | 51606215 | 51606664 |
| chr11 | 51606664 | 51607088 |
| chr11 | 51607088 | 51607357 |
| chr11 | 51614948 | 51615125 |
| chr11 | 51615233 | 51615517 |
| chr11 | 51615651 | 51615955 |

|       |          |          |
|-------|----------|----------|
| chr11 | 51615955 | 51616149 |
| chr11 | 51617770 | 51617994 |
| chr11 | 51619170 | 51619360 |
| chr11 | 51619377 | 51619854 |
| chr11 | 51619854 | 51620089 |
| chr11 | 51620733 | 51620945 |
| chr11 | 51625097 | 51625304 |
| chr11 | 51625304 | 51625647 |
| chr11 | 51625647 | 51626004 |
| chr11 | 51627767 | 51627929 |
| chr11 | 51629432 | 51629658 |
| chr11 | 51631734 | 51631998 |
| chr11 | 51635473 | 51635829 |
| chr11 | 51635829 | 51636151 |
| chr11 | 51636151 | 51636401 |
| chr11 | 51636409 | 51636646 |
| chr11 | 51648919 | 51649127 |
| chr11 | 51650195 | 51650645 |
| chr11 | 51650645 | 51651116 |
| chr11 | 51651116 | 51651507 |
| chr11 | 51651507 | 51651744 |
| chr11 | 51657177 | 51657482 |
| chr11 | 51658458 | 51658774 |
| chr11 | 51658774 | 51659438 |
| chr11 | 51661283 | 51661453 |
| chr11 | 51662948 | 51663297 |
| chr11 | 51668665 | 51668872 |
| chr11 | 51668885 | 51669189 |
| chr11 | 51671475 | 51671736 |
| chr11 | 51672565 | 51672715 |
| chr11 | 51673387 | 51673648 |
| chr11 | 51673648 | 51673861 |
| chr11 | 51681455 | 51681659 |
| chr11 | 51681659 | 51681945 |
| chr11 | 51681949 | 51682320 |
| chr11 | 51688306 | 51688573 |
| chr11 | 51688573 | 51688953 |
| chr11 | 51688953 | 51689325 |
| chr11 | 51702897 | 51703178 |
| chr11 | 51703404 | 51703664 |
| chr11 | 51703693 | 51703944 |
| chr11 | 51735913 | 51736173 |

|       |          |          |
|-------|----------|----------|
| chr11 | 51747100 | 51747317 |
| chr11 | 51755688 | 51755879 |
| chr11 | 51755904 | 51756271 |
| chr11 | 51756271 | 51756879 |
| chr11 | 51760403 | 51760568 |
| chr11 | 51763500 | 51763960 |
| chr11 | 51764923 | 51765128 |
| chr11 | 51768304 | 51768630 |
| chr11 | 51771037 | 51771438 |
| chr11 | 51777544 | 51777849 |
| chr11 | 51779680 | 51780005 |
| chr11 | 51780912 | 51781212 |
| chr11 | 51786016 | 51786280 |
| chr11 | 51789824 | 51790027 |
| chr11 | 51796280 | 51796656 |
| chr11 | 51801077 | 51801563 |
| chr11 | 51801563 | 51801910 |
| chr11 | 51805278 | 51805691 |
| chr11 | 51807204 | 51807466 |
| chr11 | 51809267 | 51809603 |
| chr11 | 51809603 | 51809903 |
| chr11 | 51812057 | 51812345 |
| chr11 | 51817743 | 51818111 |
| chr11 | 51818127 | 51818308 |
| chr11 | 51820029 | 51820267 |
| chr11 | 51820719 | 51820893 |
| chr11 | 51820911 | 51821168 |
| chr11 | 51824441 | 51824647 |
| chr11 | 51832270 | 51832510 |
| chr11 | 51832510 | 51832880 |
| chr11 | 51837809 | 51838140 |
| chr11 | 51843231 | 51843477 |
| chr11 | 51855458 | 51855733 |
| chr11 | 51855733 | 51855971 |
| chr11 | 51855971 | 51856291 |
| chr11 | 51856291 | 51856871 |
| chr11 | 51857006 | 51857408 |
| chr11 | 51857784 | 51858115 |
| chr11 | 51858888 | 51859038 |
| chr11 | 51865633 | 51865934 |
| chr11 | 51865988 | 51866511 |
| chr11 | 51866583 | 51866733 |

|       |          |          |
|-------|----------|----------|
| chr11 | 51874304 | 51874871 |
| chr11 | 51874871 | 51875372 |
| chr11 | 51875823 | 51876113 |
| chr11 | 51878268 | 51878493 |
| chr11 | 51880991 | 51881386 |
| chr11 | 51881386 | 51881676 |
| chr11 | 51881896 | 51882089 |
| chr11 | 51886844 | 51887038 |
| chr11 | 51891979 | 51892282 |
| chr11 | 51892527 | 51893180 |
| chr11 | 51895925 | 51896197 |
| chr11 | 51904151 | 51904718 |
| chr11 | 51906681 | 51906891 |
| chr11 | 51914326 | 51914522 |
| chr11 | 51915455 | 51915993 |
| chr11 | 51915993 | 51916451 |
| chr11 | 51916451 | 51916938 |
| chr11 | 51922396 | 51922949 |
| chr11 | 51922951 | 51923134 |
| chr11 | 51931008 | 51931441 |
| chr11 | 51931781 | 51932083 |
| chr11 | 51935320 | 51935625 |
| chr11 | 51940446 | 51941151 |
| chr11 | 51945481 | 51945992 |
| chr11 | 51946159 | 51946558 |
| chr11 | 51949540 | 51949809 |
| chr11 | 51950927 | 51951152 |
| chr11 | 51951223 | 51951475 |
| chr11 | 51951964 | 51952190 |
| chr11 | 51952190 | 51952399 |
| chr11 | 51957865 | 51958221 |
| chr11 | 51961204 | 51961458 |
| chr11 | 51967274 | 51967761 |
| chr11 | 51967761 | 51968047 |
| chr11 | 51968047 | 51968387 |
| chr11 | 51972832 | 51973084 |
| chr11 | 51983553 | 51983734 |
| chr11 | 51983734 | 51983939 |
| chr11 | 51983939 | 51984136 |
| chr11 | 51984471 | 51984669 |
| chr11 | 51999657 | 51999881 |
| chr11 | 51999881 | 52000085 |

|       |          |          |
|-------|----------|----------|
| chr11 | 52000085 | 52000326 |
| chr11 | 52000326 | 52000642 |
| chr11 | 52000642 | 52000997 |
| chr11 | 52003862 | 52004582 |
| chr11 | 52015838 | 52015989 |
| chr11 | 52035157 | 52035431 |
| chr11 | 52035431 | 52035688 |
| chr11 | 52035904 | 52036279 |
| chr11 | 52038374 | 52038602 |
| chr11 | 52046527 | 52046771 |
| chr11 | 52055727 | 52055923 |
| chr11 | 52056054 | 52056287 |
| chr11 | 52064021 | 52064243 |
| chr11 | 52064457 | 52064731 |
| chr11 | 52064881 | 52065043 |
| chr11 | 52069116 | 52069308 |
| chr11 | 52070865 | 52071137 |
| chr11 | 52071823 | 52072055 |
| chr11 | 52076854 | 52077316 |
| chr11 | 52077793 | 52078315 |
| chr11 | 52079947 | 52080532 |
| chr11 | 52081409 | 52081610 |
| chr11 | 52087586 | 52087907 |
| chr11 | 52088541 | 52088836 |
| chr11 | 52089278 | 52089586 |
| chr11 | 52091343 | 52091587 |
| chr11 | 52098145 | 52098596 |
| chr11 | 52098596 | 52098992 |
| chr11 | 52098992 | 52099444 |
| chr11 | 52099486 | 52099636 |
| chr11 | 52099726 | 52099935 |
| chr11 | 52104773 | 52104923 |
| chr11 | 52104976 | 52105332 |
| chr11 | 52112321 | 52112586 |
| chr11 | 52117246 | 52117470 |
| chr11 | 52118416 | 52118573 |
| chr11 | 52124473 | 52124821 |
| chr11 | 52125405 | 52125686 |
| chr11 | 52129029 | 52129223 |
| chr11 | 52129226 | 52129518 |
| chr11 | 52129773 | 52130123 |
| chr11 | 52130352 | 52130515 |

|       |          |          |
|-------|----------|----------|
| chr11 | 52130532 | 52130796 |
| chr11 | 52135727 | 52136001 |
| chr11 | 52138926 | 52139253 |
| chr11 | 52139340 | 52139646 |
| chr11 | 52143752 | 52144018 |
| chr11 | 52144041 | 52144193 |
| chr11 | 52147649 | 52147887 |
| chr11 | 52148827 | 52149374 |
| chr11 | 52155703 | 52156034 |
| chr11 | 52157296 | 52157520 |
| chr11 | 52162596 | 52162746 |
| chr11 | 52165242 | 52165410 |
| chr11 | 52167216 | 52167659 |
| chr11 | 52167794 | 52168474 |
| chr11 | 52168490 | 52168734 |
| chr11 | 52179973 | 52180226 |
| chr11 | 52181616 | 52182002 |
| chr11 | 52187256 | 52187471 |
| chr11 | 52198600 | 52199042 |
| chr11 | 52199161 | 52199507 |
| chr11 | 52212007 | 52212280 |
| chr11 | 52220335 | 52220622 |
| chr11 | 52223019 | 52223232 |
| chr11 | 52223986 | 52224349 |
| chr11 | 52224349 | 52224756 |
| chr11 | 52231532 | 52231780 |
| chr11 | 52231780 | 52231987 |
| chr11 | 52231987 | 52232248 |
| chr11 | 52232248 | 52232526 |
| chr11 | 52243086 | 52243243 |
| chr11 | 52253250 | 52253414 |
| chr11 | 52253810 | 52254023 |
| chr11 | 52254023 | 52254268 |
| chr11 | 52260824 | 52261268 |
| chr11 | 52262015 | 52262271 |
| chr11 | 52268166 | 52268424 |
| chr11 | 52275611 | 52275767 |
| chr11 | 52282448 | 52282773 |
| chr11 | 52282773 | 52283136 |
| chr11 | 52283136 | 52283366 |
| chr11 | 52283366 | 52283593 |
| chr11 | 52297417 | 52297717 |



|       |          |          |
|-------|----------|----------|
| chr11 | 52299766 | 52299946 |
| chr11 | 52301486 | 52301644 |
| chr11 | 52314500 | 52314744 |
| chr11 | 52318449 | 52318645 |
| chr11 | 52320830 | 52321038 |
| chr11 | 52332880 | 52333154 |
| chr11 | 52333533 | 52334103 |
| chr11 | 52335978 | 52336207 |
| chr11 | 52337953 | 52338212 |
| chr11 | 52341022 | 52341257 |
| chr11 | 52343208 | 52343484 |
| chr11 | 52346331 | 52346624 |
| chr11 | 52346667 | 52346903 |
| chr11 | 52350385 | 52350537 |
| chr11 | 52350903 | 52351216 |
| chr11 | 52359748 | 52359951 |
| chr11 | 52360215 | 52360490 |
| chr11 | 52360490 | 52360850 |
| chr11 | 52360850 | 52361279 |
| chr11 | 52361279 | 52361591 |
| chr11 | 52361591 | 52361821 |
| chr11 | 52363114 | 52363329 |
| chr11 | 52368603 | 52368773 |
| chr11 | 52373897 | 52374224 |
| chr11 | 52374334 | 52374788 |
| chr11 | 52379036 | 52379430 |
| chr11 | 52396249 | 52396561 |
| chr11 | 52396561 | 52396762 |
| chr11 | 52396762 | 52396962 |
| chr11 | 52396962 | 52397276 |
| chr11 | 52418472 | 52418765 |
| chr11 | 52419375 | 52419525 |
| chr11 | 52421459 | 52421610 |
| chr11 | 52425087 | 52425355 |
| chr11 | 52429758 | 52429978 |
| chr11 | 52433459 | 52433728 |
| chr11 | 52437101 | 52437417 |
| chr11 | 52447308 | 52447536 |
| chr11 | 52448846 | 52449426 |
| chr11 | 52464147 | 52464359 |
| chr11 | 52469275 | 52469528 |
| chr11 | 52480729 | 52480958 |

|       |          |          |
|-------|----------|----------|
| chr11 | 52506860 | 52507114 |
| chr11 | 52517414 | 52517637 |
| chr11 | 52534542 | 52534882 |
| chr11 | 52535438 | 52535712 |
| chr11 | 52537678 | 52538173 |
| chr11 | 52551149 | 52551440 |
| chr11 | 52551440 | 52551852 |
| chr11 | 52570302 | 52570460 |
| chr11 | 52574271 | 52574669 |
| chr11 | 52574811 | 52575039 |
| chr11 | 52610730 | 52611151 |
| chr11 | 52634298 | 52634488 |
| chr11 | 52648879 | 52649274 |
| chr11 | 52655751 | 52656073 |
| chr11 | 52656119 | 52656459 |
| chr11 | 52656459 | 52656699 |
| chr11 | 52671836 | 52672367 |
| chr11 | 52672367 | 52672617 |
| chr11 | 52718609 | 52718864 |
| chr11 | 52744001 | 52744300 |
| chr11 | 52744712 | 52744872 |
| chr11 | 52753327 | 52753789 |
| chr11 | 52764405 | 52764805 |
| chr11 | 52764805 | 52765128 |
| chr11 | 52765128 | 52765365 |
| chr11 | 52765365 | 52765561 |
| chr11 | 52765752 | 52765985 |
| chr11 | 52765985 | 52766245 |
| chr11 | 52874851 | 52875056 |
| chr11 | 52933049 | 52933396 |
| chr11 | 53016801 | 53017038 |
| chr11 | 53028517 | 53028677 |
| chr11 | 53030909 | 53031304 |
| chr11 | 53031728 | 53032185 |
| chr11 | 53032409 | 53032674 |
| chr11 | 53047915 | 53048215 |
| chr11 | 53096916 | 53097213 |
| chr11 | 53132798 | 53132948 |
| chr11 | 53139507 | 53139705 |
| chr11 | 53140243 | 53140495 |
| chr11 | 53143668 | 53143845 |
| chr11 | 53144577 | 53144861 |

|       |          |          |
|-------|----------|----------|
| chr11 | 53146376 | 53146620 |
| chr11 | 53175598 | 53175832 |
| chr11 | 53230850 | 53231000 |
| chr11 | 53231017 | 53231409 |
| chr11 | 53245556 | 53246050 |
| chr11 | 53246104 | 53246368 |
| chr11 | 53254520 | 53254739 |
| chr11 | 53254992 | 53255168 |
| chr11 | 53256420 | 53256633 |
| chr11 | 53256665 | 53256815 |
| chr11 | 53259046 | 53259276 |
| chr11 | 53259276 | 53259521 |
| chr11 | 53260188 | 53260382 |
| chr11 | 53260490 | 53260640 |
| chr11 | 53267634 | 53267935 |
| chr11 | 53288256 | 53288426 |
| chr11 | 53299529 | 53299740 |
| chr11 | 53299751 | 53299979 |
| chr11 | 53300074 | 53300407 |
| chr11 | 53300407 | 53300815 |
| chr11 | 53300815 | 53301118 |
| chr11 | 53308131 | 53308398 |
| chr11 | 53308398 | 53308636 |
| chr11 | 53314678 | 53315233 |
| chr11 | 53319936 | 53320290 |
| chr11 | 53324494 | 53324995 |
| chr11 | 53330862 | 53331082 |
| chr11 | 53331135 | 53331597 |
| chr11 | 53341076 | 53341405 |
| chr11 | 53341435 | 53341887 |
| chr11 | 53342455 | 53342838 |
| chr11 | 53350254 | 53350613 |
| chr11 | 53350613 | 53351273 |
| chr11 | 53351481 | 53351642 |
| chr11 | 53365720 | 53365880 |
| chr11 | 53374998 | 53375255 |
| chr11 | 53392214 | 53392448 |
| chr11 | 53411837 | 53412070 |
| chr11 | 53412471 | 53412664 |
| chr11 | 53414020 | 53414173 |
| chr11 | 53430270 | 53430617 |
| chr11 | 53430617 | 53430936 |

|       |          |          |
|-------|----------|----------|
| chr11 | 53430936 | 53431142 |
| chr11 | 53431142 | 53431390 |
| chr11 | 53431428 | 53431598 |
| chr11 | 53443894 | 53444230 |
| chr11 | 53450086 | 53450321 |
| chr11 | 53456540 | 53456788 |
| chr11 | 53457040 | 53457370 |
| chr11 | 53457370 | 53457642 |
| chr11 | 53457661 | 53457923 |
| chr11 | 53460214 | 53460687 |
| chr11 | 53461789 | 53461975 |
| chr11 | 53469964 | 53470261 |
| chr11 | 53470303 | 53470611 |
| chr11 | 53472834 | 53473021 |
| chr11 | 53479720 | 53479941 |
| chr11 | 53479959 | 53480287 |
| chr11 | 53483082 | 53483520 |
| chr11 | 53483520 | 53484148 |
| chr11 | 53487215 | 53487668 |
| chr11 | 53494483 | 53494719 |
| chr11 | 53500557 | 53501001 |
| chr11 | 53503787 | 53504073 |
| chr11 | 53508157 | 53508431 |
| chr11 | 53508431 | 53508664 |
| chr11 | 53508718 | 53508994 |
| chr11 | 53519327 | 53519527 |
| chr11 | 53519527 | 53519738 |
| chr11 | 53519738 | 53519979 |
| chr11 | 53519979 | 53520182 |
| chr11 | 53520182 | 53520384 |
| chr11 | 53520384 | 53520661 |
| chr11 | 53520661 | 53520951 |
| chr11 | 53536721 | 53536943 |
| chr11 | 53539146 | 53539525 |
| chr11 | 53541465 | 53541690 |
| chr11 | 53543738 | 53543924 |
| chr11 | 53545400 | 53545560 |
| chr11 | 53558082 | 53558352 |
| chr11 | 53567062 | 53567493 |
| chr11 | 53567493 | 53567707 |
| chr11 | 53567707 | 53567997 |
| chr11 | 53572992 | 53573282 |

|       |          |          |
|-------|----------|----------|
| chr11 | 53577709 | 53577876 |
| chr11 | 53583989 | 53584240 |
| chr11 | 53584913 | 53585130 |
| chr11 | 53590344 | 53590496 |
| chr11 | 53627924 | 53628228 |
| chr11 | 53632387 | 53632762 |
| chr11 | 53636140 | 53636489 |
| chr11 | 53655127 | 53655387 |
| chr11 | 53706633 | 53706950 |
| chr11 | 53706950 | 53707228 |
| chr11 | 53707228 | 53707667 |
| chr11 | 53728708 | 53728914 |
| chr11 | 53735606 | 53735902 |
| chr11 | 53735902 | 53736072 |
| chr11 | 53737054 | 53737396 |
| chr11 | 53737396 | 53737662 |
| chr11 | 53737662 | 53737933 |
| chr11 | 53749753 | 53750062 |
| chr11 | 53750960 | 53751176 |
| chr11 | 53751176 | 53751383 |
| chr11 | 53754914 | 53755507 |
| chr11 | 53759579 | 53759734 |
| chr11 | 53761358 | 53761566 |
| chr11 | 53761787 | 53762287 |
| chr11 | 53762400 | 53762867 |
| chr11 | 53762867 | 53763219 |
| chr11 | 53763269 | 53763539 |
| chr11 | 53763539 | 53763859 |
| chr11 | 53763859 | 53764195 |
| chr11 | 53769696 | 53770180 |
| chr11 | 53770180 | 53770559 |
| chr11 | 53770559 | 53770836 |
| chr11 | 53774846 | 53774996 |
| chr11 | 53779705 | 53780187 |
| chr11 | 53780334 | 53780523 |
| chr11 | 53786329 | 53786690 |
| chr11 | 53794631 | 53795203 |
| chr11 | 53795203 | 53795595 |
| chr11 | 53795858 | 53796250 |
| chr11 | 53796570 | 53797166 |
| chr11 | 53802902 | 53803136 |
| chr11 | 53803136 | 53803483 |

|       |          |          |
|-------|----------|----------|
| chr11 | 53803483 | 53803824 |
| chr11 | 53803824 | 53804167 |
| chr11 | 53804719 | 53804940 |
| chr11 | 53810178 | 53810461 |
| chr11 | 53815018 | 53815181 |
| chr11 | 53820404 | 53820861 |
| chr11 | 53821070 | 53821226 |
| chr11 | 53821389 | 53821907 |
| chr11 | 53837740 | 53838045 |
| chr11 | 53839721 | 53840099 |
| chr11 | 53840099 | 53840592 |
| chr11 | 53849947 | 53850236 |
| chr11 | 53851792 | 53852117 |
| chr11 | 53852117 | 53852495 |
| chr11 | 53853731 | 53853961 |
| chr11 | 53858813 | 53859287 |
| chr11 | 53859287 | 53859804 |
| chr11 | 53861138 | 53861288 |
| chr11 | 53868208 | 53868622 |
| chr11 | 53873963 | 53874234 |
| chr11 | 53874814 | 53875047 |
| chr11 | 53883674 | 53884006 |
| chr11 | 53891020 | 53891522 |
| chr11 | 53891522 | 53892169 |
| chr11 | 53903658 | 53904138 |
| chr11 | 53904138 | 53904501 |
| chr11 | 53914750 | 53914939 |
| chr11 | 53915700 | 53916001 |
| chr11 | 53929718 | 53930053 |
| chr11 | 53931437 | 53931690 |
| chr11 | 53931690 | 53931860 |
| chr11 | 53931935 | 53932181 |
| chr11 | 53948382 | 53948540 |
| chr11 | 53953723 | 53953889 |
| chr11 | 53953905 | 53954077 |
| chr11 | 53956668 | 53956952 |
| chr11 | 53958330 | 53958495 |
| chr11 | 53959093 | 53959292 |
| chr11 | 53960945 | 53961107 |
| chr11 | 53969075 | 53969445 |
| chr11 | 53969445 | 53969839 |
| chr11 | 53979439 | 53979779 |

|       |          |          |
|-------|----------|----------|
| chr11 | 53979779 | 53980099 |
| chr11 | 53980099 | 53980612 |
| chr11 | 53989321 | 53989480 |
| chr11 | 54002207 | 54002442 |
| chr11 | 54002836 | 54003050 |
| chr11 | 54003058 | 54003253 |
| chr11 | 54003253 | 54003450 |
| chr11 | 54003692 | 54003848 |
| chr11 | 54003848 | 54003995 |
| chr11 | 54004154 | 54004631 |
| chr11 | 54004699 | 54004977 |
| chr11 | 54011107 | 54011313 |
| chr11 | 54011313 | 54011862 |
| chr11 | 54017655 | 54017973 |
| chr11 | 54018259 | 54018585 |
| chr11 | 54018891 | 54019253 |
| chr11 | 54019253 | 54019755 |
| chr11 | 54024615 | 54024799 |
| chr11 | 54027879 | 54028431 |
| chr11 | 54028431 | 54028929 |
| chr11 | 54051183 | 54051343 |
| chr11 | 54054305 | 54054592 |
| chr11 | 54060277 | 54060774 |
| chr11 | 54061092 | 54061446 |
| chr11 | 54061950 | 54062583 |
| chr11 | 54065850 | 54066049 |
| chr11 | 54066521 | 54066738 |
| chr11 | 54066804 | 54066977 |
| chr11 | 54069938 | 54070154 |
| chr11 | 54072759 | 54072954 |
| chr11 | 54073384 | 54073594 |
| chr11 | 54080390 | 54080778 |
| chr11 | 54085975 | 54086128 |
| chr11 | 54088797 | 54089194 |
| chr11 | 54089194 | 54089411 |
| chr11 | 54093072 | 54093381 |
| chr11 | 54100422 | 54100572 |
| chr11 | 54100643 | 54101081 |
| chr11 | 54101081 | 54101478 |
| chr11 | 54101608 | 54101891 |
| chr11 | 54106599 | 54107164 |
| chr11 | 54108970 | 54109383 |

|       |          |          |
|-------|----------|----------|
| chr11 | 54112867 | 54113307 |
| chr11 | 54119870 | 54120023 |
| chr11 | 54122610 | 54122797 |
| chr11 | 54122886 | 54123251 |
| chr11 | 54132387 | 54132609 |
| chr11 | 54140019 | 54140388 |
| chr11 | 54140388 | 54140702 |
| chr11 | 54141342 | 54141530 |
| chr11 | 54141628 | 54142007 |
| chr11 | 54144513 | 54144890 |
| chr11 | 54144946 | 54145201 |
| chr11 | 54147380 | 54147640 |
| chr11 | 54149498 | 54149806 |
| chr11 | 54155613 | 54156444 |
| chr11 | 54178970 | 54179216 |
| chr11 | 54181594 | 54181998 |
| chr11 | 54181998 | 54182306 |
| chr11 | 54185673 | 54185823 |
| chr11 | 54185908 | 54186394 |
| chr11 | 54201205 | 54201567 |
| chr11 | 54201567 | 54201854 |
| chr11 | 54201854 | 54202272 |
| chr11 | 54202809 | 54203028 |
| chr11 | 54203789 | 54204036 |
| chr11 | 54204114 | 54204323 |
| chr11 | 54205453 | 54205684 |
| chr11 | 54206849 | 54207410 |
| chr11 | 54214508 | 54215059 |
| chr11 | 54216092 | 54216691 |
| chr11 | 54217350 | 54218022 |
| chr11 | 54221936 | 54222304 |
| chr11 | 54224011 | 54224437 |
| chr11 | 54224437 | 54224656 |
| chr11 | 54224656 | 54224902 |
| chr11 | 54224902 | 54225133 |
| chr11 | 54231384 | 54231627 |
| chr11 | 54232087 | 54232292 |
| chr11 | 54232310 | 54232525 |
| chr11 | 54236748 | 54236905 |
| chr11 | 54236931 | 54237504 |
| chr11 | 54242588 | 54242740 |
| chr11 | 54244358 | 54244614 |



|       |          |          |
|-------|----------|----------|
| chr11 | 54245395 | 54245593 |
| chr11 | 54245851 | 54246042 |
| chr11 | 54246242 | 54246517 |
| chr11 | 54248997 | 54249413 |
| chr11 | 54249413 | 54249867 |
| chr11 | 54249891 | 54250068 |
| chr11 | 54254180 | 54254428 |
| chr11 | 54257047 | 54257335 |
| chr11 | 54257997 | 54258225 |
| chr11 | 54258234 | 54258441 |
| chr11 | 54258617 | 54258804 |
| chr11 | 54263569 | 54263724 |
| chr11 | 54264634 | 54264872 |
| chr11 | 54267505 | 54267774 |
| chr11 | 54268649 | 54268843 |
| chr11 | 54269387 | 54269854 |
| chr11 | 54270364 | 54270527 |
| chr11 | 54286571 | 54286740 |
| chr11 | 54303147 | 54303349 |
| chr11 | 54304030 | 54304298 |
| chr11 | 54306498 | 54306960 |
| chr11 | 54307505 | 54307719 |
| chr11 | 54317360 | 54317606 |
| chr11 | 54326130 | 54326520 |
| chr11 | 54326520 | 54326797 |
| chr11 | 54326797 | 54327155 |
| chr11 | 54354666 | 54354944 |
| chr11 | 54400896 | 54401086 |
| chr11 | 54432675 | 54432909 |
| chr11 | 54437763 | 54438083 |
| chr11 | 54438083 | 54438318 |
| chr11 | 54438318 | 54438834 |
| chr11 | 54444060 | 54444285 |
| chr11 | 54491997 | 54492267 |
| chr11 | 54492267 | 54492532 |
| chr11 | 54492604 | 54492856 |
| chr11 | 54522414 | 54522937 |
| chr11 | 54522937 | 54523257 |
| chr11 | 54523257 | 54523499 |
| chr11 | 54528983 | 54529250 |
| chr11 | 54534994 | 54535235 |
| chr11 | 54620367 | 54620602 |

|       |          |          |
|-------|----------|----------|
| chr11 | 54659596 | 54659774 |
| chr11 | 54693747 | 54694087 |
| chr11 | 54696100 | 54696290 |
| chr11 | 54702770 | 54703006 |
| chr11 | 54703186 | 54703336 |
| chr11 | 54703351 | 54703631 |
| chr11 | 54703686 | 54703873 |
| chr11 | 54703873 | 54704105 |
| chr11 | 54724434 | 54724676 |
| chr11 | 54724745 | 54724935 |
| chr11 | 54726541 | 54726735 |
| chr11 | 54727178 | 54727410 |
| chr11 | 54727410 | 54727638 |
| chr11 | 54729358 | 54729576 |
| chr11 | 54733255 | 54733492 |
| chr11 | 54748601 | 54748848 |
| chr11 | 54748891 | 54749456 |
| chr11 | 54755203 | 54755439 |
| chr11 | 54786806 | 54787021 |
| chr11 | 54787021 | 54787260 |
| chr11 | 54787260 | 54787540 |
| chr11 | 54787540 | 54788106 |
| chr11 | 54801756 | 54802127 |
| chr11 | 54802191 | 54802599 |
| chr11 | 54803948 | 54804363 |
| chr11 | 54809703 | 54810327 |
| chr11 | 54812832 | 54812985 |
| chr11 | 54813136 | 54813466 |
| chr11 | 54830315 | 54830595 |
| chr11 | 54830655 | 54830921 |
| chr11 | 54859408 | 54859603 |
| chr11 | 54860285 | 54861165 |
| chr11 | 54866043 | 54866504 |
| chr11 | 54866504 | 54867034 |
| chr11 | 54867044 | 54867281 |
| chr11 | 54869408 | 54869641 |
| chr11 | 54874990 | 54875306 |
| chr11 | 54879453 | 54879738 |
| chr11 | 54880844 | 54881273 |
| chr11 | 54881273 | 54881632 |
| chr11 | 54899430 | 54899604 |
| chr11 | 54899635 | 54900078 |

|       |          |          |
|-------|----------|----------|
| chr11 | 54901623 | 54901843 |
| chr11 | 54906124 | 54906342 |
| chr11 | 54906438 | 54906931 |
| chr11 | 54916821 | 54916971 |
| chr11 | 54917602 | 54917752 |
| chr11 | 54918356 | 54918616 |
| chr11 | 54927804 | 54928081 |
| chr11 | 54928097 | 54928247 |
| chr11 | 54930401 | 54930616 |
| chr11 | 54934215 | 54934509 |
| chr11 | 54935983 | 54936405 |
| chr11 | 54936405 | 54936842 |
| chr11 | 54936842 | 54937213 |
| chr11 | 54946889 | 54947263 |
| chr11 | 54948370 | 54948676 |
| chr11 | 54952716 | 54953146 |
| chr11 | 54953994 | 54954412 |
| chr11 | 54955631 | 54955998 |
| chr11 | 54955998 | 54956333 |
| chr11 | 54958440 | 54958737 |
| chr11 | 54958737 | 54959006 |
| chr11 | 54961403 | 54961949 |
| chr11 | 54962714 | 54963160 |
| chr11 | 54965307 | 54965571 |
| chr11 | 54970555 | 54971112 |
| chr11 | 54971431 | 54971591 |
| chr11 | 54971595 | 54971919 |
| chr11 | 54972085 | 54972378 |
| chr11 | 54972378 | 54972728 |
| chr11 | 54984181 | 54984427 |
| chr11 | 54984462 | 54984616 |
| chr11 | 54984635 | 54984934 |
| chr11 | 54985175 | 54985383 |
| chr11 | 54985441 | 54985631 |
| chr11 | 54985631 | 54985861 |
| chr11 | 54988049 | 54988277 |
| chr11 | 54989769 | 54990019 |
| chr11 | 54992903 | 54993073 |
| chr11 | 54998281 | 54998672 |
| chr11 | 54998672 | 54998962 |
| chr11 | 54998962 | 54999144 |
| chr11 | 55006620 | 55006977 |

|       |          |          |
|-------|----------|----------|
| chr11 | 55012917 | 55013139 |
| chr11 | 55013139 | 55013360 |
| chr11 | 55021932 | 55022226 |
| chr11 | 55022983 | 55023473 |
| chr11 | 55024486 | 55024706 |
| chr11 | 55027467 | 55027724 |
| chr11 | 55027724 | 55027964 |
| chr11 | 55027964 | 55028254 |
| chr11 | 55031724 | 55031934 |
| chr11 | 55032942 | 55033120 |
| chr11 | 55033174 | 55033690 |
| chr11 | 55033758 | 55033924 |
| chr11 | 55036671 | 55036920 |
| chr11 | 55039557 | 55039985 |
| chr11 | 55045300 | 55045741 |
| chr11 | 55046693 | 55046909 |
| chr11 | 55050845 | 55051208 |
| chr11 | 55060843 | 55061207 |
| chr11 | 55062943 | 55063208 |
| chr11 | 55063208 | 55063426 |
| chr11 | 55066976 | 55067497 |
| chr11 | 55069105 | 55069265 |
| chr11 | 55076320 | 55076486 |
| chr11 | 55077143 | 55077565 |
| chr11 | 55077565 | 55077883 |
| chr11 | 55077883 | 55078250 |
| chr11 | 55087057 | 55087345 |
| chr11 | 55097554 | 55097919 |
| chr11 | 55097919 | 55098432 |
| chr11 | 55100993 | 55101470 |
| chr11 | 55102331 | 55102639 |
| chr11 | 55111899 | 55112049 |
| chr11 | 55113712 | 55113888 |
| chr11 | 55116138 | 55116409 |
| chr11 | 55125634 | 55125803 |
| chr11 | 55127964 | 55128275 |
| chr11 | 55131011 | 55131352 |
| chr11 | 55134512 | 55134734 |
| chr11 | 55134957 | 55135158 |
| chr11 | 55158847 | 55159287 |
| chr11 | 55162696 | 55163062 |
| chr11 | 55164681 | 55165053 |

|       |          |          |
|-------|----------|----------|
| chr11 | 55170662 | 55170841 |
| chr11 | 55178904 | 55179060 |
| chr11 | 55180174 | 55180581 |
| chr11 | 55185654 | 55186075 |
| chr11 | 55187364 | 55187531 |
| chr11 | 55194614 | 55195145 |
| chr11 | 55195246 | 55195485 |
| chr11 | 55197133 | 55197396 |
| chr11 | 55198286 | 55198504 |
| chr11 | 55204131 | 55204408 |
| chr11 | 55204408 | 55204713 |
| chr11 | 55204713 | 55205003 |
| chr11 | 55217757 | 55218510 |
| chr11 | 55219063 | 55219355 |
| chr11 | 55236594 | 55236869 |
| chr11 | 55236869 | 55237190 |
| chr11 | 55237190 | 55237448 |
| chr11 | 55240644 | 55240952 |
| chr11 | 55250797 | 55251045 |
| chr11 | 55251297 | 55251541 |
| chr11 | 55264325 | 55264670 |
| chr11 | 55264670 | 55265203 |
| chr11 | 55273079 | 55273258 |
| chr11 | 55274522 | 55275241 |
| chr11 | 55280109 | 55280499 |
| chr11 | 55289813 | 55290392 |
| chr11 | 55291843 | 55292315 |
| chr11 | 55302254 | 55302952 |
| chr11 | 55313748 | 55314165 |
| chr11 | 55328215 | 55328370 |
| chr11 | 55328372 | 55328643 |
| chr11 | 55329424 | 55329733 |
| chr11 | 55335740 | 55335985 |
| chr11 | 55342102 | 55342317 |
| chr11 | 55342852 | 55343057 |
| chr11 | 55343057 | 55343489 |
| chr11 | 55347311 | 55347595 |
| chr11 | 55358520 | 55358718 |
| chr11 | 55358816 | 55359182 |
| chr11 | 55361238 | 55361734 |
| chr11 | 55377236 | 55377432 |
| chr11 | 55378409 | 55378729 |

|       |          |          |
|-------|----------|----------|
| chr11 | 55386276 | 55386523 |
| chr11 | 55386523 | 55386865 |
| chr11 | 55389831 | 55390115 |
| chr11 | 55400881 | 55401255 |
| chr11 | 55404584 | 55404807 |
| chr11 | 55404807 | 55405024 |
| chr11 | 55405732 | 55406543 |
| chr11 | 55415828 | 55416057 |
| chr11 | 55417437 | 55417638 |
| chr11 | 55417834 | 55418197 |
| chr11 | 55418197 | 55418470 |
| chr11 | 55418723 | 55419034 |
| chr11 | 55419552 | 55420120 |
| chr11 | 55423815 | 55424030 |
| chr11 | 55428048 | 55428865 |
| chr11 | 55439727 | 55439956 |
| chr11 | 55441173 | 55441341 |
| chr11 | 55444852 | 55445141 |
| chr11 | 55446492 | 55446963 |
| chr11 | 55453097 | 55453377 |
| chr11 | 55453441 | 55453672 |
| chr11 | 55453672 | 55453983 |
| chr11 | 55455295 | 55455582 |
| chr11 | 55455582 | 55455858 |
| chr11 | 55455962 | 55456122 |
| chr11 | 55460617 | 55461024 |
| chr11 | 55461024 | 55461633 |
| chr11 | 55468849 | 55469059 |
| chr11 | 55469074 | 55469430 |
| chr11 | 55469430 | 55470140 |
| chr11 | 55477237 | 55477575 |
| chr11 | 55481194 | 55481433 |
| chr11 | 55483824 | 55484092 |
| chr11 | 55487250 | 55487450 |
| chr11 | 55497760 | 55498252 |
| chr11 | 55503066 | 55503244 |
| chr11 | 55503499 | 55503833 |
| chr11 | 55503833 | 55504118 |
| chr11 | 55504118 | 55504315 |
| chr11 | 55505399 | 55505824 |
| chr11 | 55505824 | 55506061 |
| chr11 | 55511364 | 55511562 |

|       |          |          |
|-------|----------|----------|
| chr11 | 55512474 | 55512723 |
| chr11 | 55518768 | 55519117 |
| chr11 | 55519122 | 55519272 |
| chr11 | 55519364 | 55519514 |
| chr11 | 55522632 | 55522833 |
| chr11 | 55574493 | 55574806 |
| chr11 | 55589871 | 55590047 |
| chr11 | 55607571 | 55607739 |
| chr11 | 55607779 | 55608080 |
| chr11 | 55682485 | 55682661 |
| chr11 | 55695442 | 55695610 |
| chr11 | 55819697 | 55819939 |
| chr11 | 55882572 | 55882819 |
| chr11 | 56001382 | 56001696 |
| chr11 | 56107960 | 56108218 |
| chr11 | 56131330 | 56131556 |
| chr11 | 56862636 | 56862995 |
| chr11 | 56897177 | 56897333 |
| chr11 | 56901052 | 56901279 |
| chr11 | 56901279 | 56901510 |
| chr11 | 56999846 | 57000001 |
| chr11 | 57026364 | 57026605 |
| chr11 | 57026690 | 57026965 |
| chr11 | 57051964 | 57052359 |
| chr11 | 57052359 | 57052810 |
| chr11 | 57079514 | 57079814 |
| chr11 | 57089959 | 57090272 |
| chr11 | 57090853 | 57091036 |
| chr11 | 57091224 | 57091614 |
| chr11 | 57091614 | 57092009 |
| chr11 | 57096800 | 57096997 |
| chr11 | 57121862 | 57122071 |
| chr11 | 57130179 | 57130589 |
| chr11 | 57131676 | 57131872 |
| chr11 | 57140353 | 57140554 |
| chr11 | 57140554 | 57140858 |
| chr11 | 57169962 | 57170212 |
| chr11 | 57170212 | 57170432 |
| chr11 | 57176044 | 57176262 |
| chr11 | 57176612 | 57176797 |
| chr11 | 57249723 | 57249994 |
| chr11 | 57250281 | 57250492 |

|       |          |          |
|-------|----------|----------|
| chr11 | 57258678 | 57258930 |
| chr11 | 57297543 | 57297693 |
| chr11 | 57302577 | 57302757 |
| chr11 | 57310860 | 57311072 |
| chr11 | 57367404 | 57367617 |
| chr11 | 57414770 | 57414920 |
| chr11 | 57465097 | 57465361 |
| chr11 | 57467817 | 57468082 |
| chr11 | 57470177 | 57470407 |
| chr11 | 57475208 | 57475447 |
| chr11 | 57479923 | 57480281 |
| chr11 | 57496535 | 57496730 |
| chr11 | 57496765 | 57497028 |
| chr11 | 57501836 | 57502116 |
| chr11 | 57517071 | 57517430 |
| chr11 | 57517993 | 57518294 |
| chr11 | 57518294 | 57518522 |
| chr11 | 57518522 | 57519003 |
| chr11 | 57528224 | 57528421 |
| chr11 | 57536581 | 57536745 |
| chr11 | 57539849 | 57540267 |
| chr11 | 57546153 | 57546350 |
| chr11 | 57547263 | 57547561 |
| chr11 | 57547815 | 57548106 |
| chr11 | 57548963 | 57549240 |
| chr11 | 57550312 | 57550539 |
| chr11 | 57551055 | 57551292 |
| chr11 | 57563082 | 57563346 |
| chr11 | 57568976 | 57569459 |
| chr11 | 57569459 | 57569785 |
| chr11 | 57585766 | 57585945 |
| chr11 | 57589567 | 57589838 |
| chr11 | 57601207 | 57601546 |
| chr11 | 57610999 | 57611268 |
| chr11 | 57617560 | 57617887 |
| chr11 | 57619022 | 57619232 |
| chr11 | 57627172 | 57627555 |
| chr11 | 57627833 | 57628050 |
| chr11 | 57630953 | 57631125 |
| chr11 | 57642702 | 57643006 |
| chr11 | 57644241 | 57644445 |
| chr11 | 57644445 | 57644639 |



|       |          |          |
|-------|----------|----------|
| chr11 | 57644639 | 57644828 |
| chr11 | 57644828 | 57645030 |
| chr11 | 57645030 | 57645294 |
| chr11 | 57645294 | 57645801 |
| chr11 | 57657778 | 57658087 |
| chr11 | 57660648 | 57660953 |
| chr11 | 57666170 | 57666417 |
| chr11 | 57672995 | 57673390 |
| chr11 | 57687951 | 57688232 |
| chr11 | 57688232 | 57688602 |
| chr11 | 57688602 | 57688993 |
| chr11 | 57689942 | 57690162 |
| chr11 | 57694421 | 57694942 |
| chr11 | 57695028 | 57695178 |
| chr11 | 57706452 | 57706816 |
| chr11 | 57707276 | 57707721 |
| chr11 | 57708342 | 57708509 |
| chr11 | 57708904 | 57709064 |
| chr11 | 57719428 | 57720044 |
| chr11 | 57720044 | 57720401 |
| chr11 | 57724938 | 57725094 |
| chr11 | 57747331 | 57747701 |
| chr11 | 57750448 | 57750674 |
| chr11 | 57758774 | 57758955 |
| chr11 | 57767731 | 57768013 |
| chr11 | 57773180 | 57773380 |
| chr11 | 57773459 | 57773609 |
| chr11 | 57774450 | 57774680 |
| chr11 | 57778420 | 57778675 |
| chr11 | 57778715 | 57778886 |
| chr11 | 57787988 | 57788385 |
| chr11 | 57789942 | 57790151 |
| chr11 | 57791105 | 57791524 |
| chr11 | 57793729 | 57793879 |
| chr11 | 57800706 | 57800856 |
| chr11 | 57800967 | 57801153 |
| chr11 | 57801153 | 57801397 |
| chr11 | 57801397 | 57801852 |
| chr11 | 57801852 | 57802386 |
| chr11 | 57805140 | 57805315 |
| chr11 | 57818789 | 57818954 |
| chr11 | 57820063 | 57820289 |

|       |          |          |
|-------|----------|----------|
| chr11 | 57820289 | 57820514 |
| chr11 | 57823295 | 57823519 |
| chr11 | 57825331 | 57825578 |
| chr11 | 57845791 | 57846180 |
| chr11 | 57846691 | 57846990 |
| chr11 | 57847089 | 57847332 |
| chr11 | 57850383 | 57850701 |
| chr11 | 57850869 | 57851130 |
| chr11 | 57853462 | 57853690 |
| chr11 | 57855563 | 57855992 |
| chr11 | 57857357 | 57857556 |
| chr11 | 57857674 | 57858038 |
| chr11 | 57862105 | 57862454 |
| chr11 | 57864400 | 57864623 |
| chr11 | 57868816 | 57869078 |
| chr11 | 57876269 | 57876419 |
| chr11 | 57883368 | 57883670 |
| chr11 | 57883670 | 57884208 |
| chr11 | 57899283 | 57899949 |
| chr11 | 57900737 | 57901081 |
| chr11 | 57911650 | 57912275 |
| chr11 | 57913008 | 57913399 |
| chr11 | 57913895 | 57914110 |
| chr11 | 57914240 | 57914561 |
| chr11 | 57916125 | 57916287 |
| chr11 | 57917978 | 57918236 |
| chr11 | 57923281 | 57923499 |
| chr11 | 57933085 | 57933303 |
| chr11 | 57934176 | 57934616 |
| chr11 | 57934616 | 57934933 |
| chr11 | 57935203 | 57935358 |
| chr11 | 57947354 | 57947789 |
| chr11 | 57949128 | 57949293 |
| chr11 | 57952511 | 57952725 |
| chr11 | 57952725 | 57953088 |
| chr11 | 57962317 | 57962659 |
| chr11 | 57962659 | 57963104 |
| chr11 | 57964197 | 57964368 |
| chr11 | 57969899 | 57970076 |
| chr11 | 57970481 | 57970954 |
| chr11 | 57972915 | 57973645 |
| chr11 | 57984072 | 57984264 |

|       |          |          |
|-------|----------|----------|
| chr11 | 57993111 | 57993598 |
| chr11 | 57998899 | 57999222 |
| chr11 | 58008400 | 58008607 |
| chr11 | 58008607 | 58008924 |
| chr11 | 58008924 | 58009240 |
| chr11 | 58009240 | 58009449 |
| chr11 | 58009470 | 58009800 |
| chr11 | 58009800 | 58010104 |
| chr11 | 58010613 | 58010763 |
| chr11 | 58016334 | 58016911 |
| chr11 | 58017617 | 58017786 |
| chr11 | 58018376 | 58018593 |
| chr11 | 58018828 | 58019007 |
| chr11 | 58024192 | 58024575 |
| chr11 | 58024575 | 58025046 |
| chr11 | 58030920 | 58031077 |
| chr11 | 58039099 | 58039331 |
| chr11 | 58042494 | 58042698 |
| chr11 | 58043018 | 58043398 |
| chr11 | 58043645 | 58043879 |
| chr11 | 58046052 | 58046332 |
| chr11 | 58046523 | 58046736 |
| chr11 | 58057377 | 58057548 |
| chr11 | 58057567 | 58057803 |
| chr11 | 58059821 | 58060018 |
| chr11 | 58066758 | 58066925 |
| chr11 | 58067584 | 58067734 |
| chr11 | 58068009 | 58068232 |
| chr11 | 58068747 | 58069312 |
| chr11 | 58069357 | 58069517 |
| chr11 | 58089876 | 58090106 |
| chr11 | 58090743 | 58091139 |
| chr11 | 58091560 | 58091710 |
| chr11 | 58093009 | 58093240 |
| chr11 | 58095985 | 58096141 |
| chr11 | 58096186 | 58096390 |
| chr11 | 58097221 | 58097502 |
| chr11 | 58097649 | 58097874 |
| chr11 | 58097874 | 58098187 |
| chr11 | 58098401 | 58098649 |
| chr11 | 58103464 | 58103820 |
| chr11 | 58103820 | 58104373 |

|       |          |          |
|-------|----------|----------|
| chr11 | 58104373 | 58104852 |
| chr11 | 58116876 | 58117443 |
| chr11 | 58126484 | 58126649 |
| chr11 | 58168045 | 58168360 |
| chr11 | 58168360 | 58168689 |
| chr11 | 58168689 | 58168974 |
| chr11 | 58171399 | 58171740 |
| chr11 | 58171740 | 58172028 |
| chr11 | 58178147 | 58178360 |
| chr11 | 58179606 | 58179964 |
| chr11 | 58180085 | 58180239 |
| chr11 | 58199160 | 58199428 |
| chr11 | 58199428 | 58199677 |
| chr11 | 58199677 | 58199959 |
| chr11 | 58210880 | 58211091 |
| chr11 | 58214631 | 58215061 |
| chr11 | 58215061 | 58215345 |
| chr11 | 58223762 | 58224014 |
| chr11 | 58224428 | 58224618 |
| chr11 | 58225490 | 58225705 |
| chr11 | 58225705 | 58226096 |
| chr11 | 58235251 | 58235527 |
| chr11 | 58239129 | 58239541 |
| chr11 | 58239541 | 58239851 |
| chr11 | 58244071 | 58244261 |
| chr11 | 58249258 | 58249514 |
| chr11 | 58249717 | 58249982 |
| chr11 | 58286238 | 58286468 |
| chr11 | 58288746 | 58289183 |
| chr11 | 58289400 | 58289733 |
| chr11 | 58292858 | 58293118 |
| chr11 | 58301317 | 58301478 |
| chr11 | 58301750 | 58302087 |
| chr11 | 58302087 | 58302394 |
| chr11 | 58302394 | 58302735 |
| chr11 | 58302735 | 58303055 |
| chr11 | 58306920 | 58307285 |
| chr11 | 58307440 | 58308141 |
| chr11 | 58322754 | 58323202 |
| chr11 | 58323202 | 58323687 |
| chr11 | 58330011 | 58330196 |
| chr11 | 58330249 | 58330486 |

|       |          |          |
|-------|----------|----------|
| chr11 | 58330524 | 58330847 |
| chr11 | 58330876 | 58331135 |
| chr11 | 58334596 | 58334917 |
| chr11 | 58334917 | 58335174 |
| chr11 | 58352787 | 58352965 |
| chr11 | 58364803 | 58365005 |
| chr11 | 58380218 | 58381008 |
| chr11 | 58401983 | 58402183 |
| chr11 | 58402183 | 58402424 |
| chr11 | 58405571 | 58405771 |
| chr11 | 58406114 | 58406266 |
| chr11 | 58466624 | 58466774 |
| chr11 | 58466801 | 58466955 |
| chr11 | 58502330 | 58502646 |
| chr11 | 58567194 | 58567465 |
| chr11 | 58572542 | 58572771 |
| chr11 | 58580787 | 58580953 |
| chr11 | 58591288 | 58591446 |
| chr11 | 58596514 | 58596733 |
| chr11 | 58636642 | 58636910 |
| chr11 | 58638230 | 58638626 |
| chr11 | 58640511 | 58640802 |
| chr11 | 58642633 | 58642866 |
| chr11 | 58643393 | 58643752 |
| chr11 | 58766626 | 58766969 |
| chr11 | 58773040 | 58773287 |
| chr11 | 58782532 | 58782718 |
| chr11 | 58782829 | 58783011 |
| chr11 | 58789377 | 58789873 |
| chr11 | 58790504 | 58791018 |
| chr11 | 58801684 | 58801844 |
| chr11 | 58801909 | 58802196 |
| chr11 | 58846925 | 58847650 |
| chr11 | 58867099 | 58867425 |
| chr11 | 58867425 | 58867645 |
| chr11 | 58893919 | 58894101 |
| chr11 | 58903576 | 58904159 |
| chr11 | 58904159 | 58904393 |
| chr11 | 58904393 | 58904594 |
| chr11 | 58914439 | 58914756 |
| chr11 | 58916773 | 58917270 |
| chr11 | 58919338 | 58919571 |

|       |          |          |
|-------|----------|----------|
| chr11 | 58927995 | 58928344 |
| chr11 | 58928344 | 58928706 |
| chr11 | 58931655 | 58932048 |
| chr11 | 58937918 | 58938092 |
| chr11 | 58938176 | 58938763 |
| chr11 | 58938763 | 58939236 |
| chr11 | 58948168 | 58948453 |
| chr11 | 58948483 | 58948972 |
| chr11 | 58948972 | 58949355 |
| chr11 | 58954005 | 58954203 |
| chr11 | 58954203 | 58954431 |
| chr11 | 58954431 | 58954733 |
| chr11 | 58954733 | 58954961 |
| chr11 | 58954961 | 58955370 |
| chr11 | 58959903 | 58960237 |
| chr11 | 58960237 | 58960521 |
| chr11 | 58965623 | 58965834 |
| chr11 | 58967426 | 58967658 |
| chr11 | 58977222 | 58977513 |
| chr11 | 58977534 | 58977727 |
| chr11 | 58977727 | 58977969 |
| chr11 | 58977969 | 58978217 |
| chr11 | 58978217 | 58978490 |
| chr11 | 58978490 | 58978900 |
| chr11 | 58979740 | 58979932 |
| chr11 | 58981997 | 58982248 |
| chr11 | 58982248 | 58982503 |
| chr11 | 58985638 | 58985850 |
| chr11 | 58990233 | 58990392 |
| chr11 | 58994289 | 58994819 |
| chr11 | 59004940 | 59005215 |
| chr11 | 59011330 | 59011507 |
| chr11 | 59015005 | 59015447 |
| chr11 | 59034647 | 59034842 |
| chr11 | 59044859 | 59045130 |
| chr11 | 59082577 | 59082747 |
| chr11 | 59085146 | 59085350 |
| chr11 | 59097565 | 59097741 |
| chr11 | 59098497 | 59098648 |
| chr11 | 59116379 | 59116695 |
| chr11 | 59134344 | 59134687 |
| chr11 | 59134687 | 59134934 |

|       |          |          |
|-------|----------|----------|
| chr11 | 59137424 | 59137579 |
| chr11 | 59141834 | 59142161 |
| chr11 | 59151830 | 59151989 |
| chr11 | 59152517 | 59152727 |
| chr11 | 59154242 | 59154577 |
| chr11 | 59163207 | 59163634 |
| chr11 | 59163634 | 59164025 |
| chr11 | 59169695 | 59169977 |
| chr11 | 59169977 | 59170265 |
| chr11 | 59170709 | 59170907 |
| chr11 | 59174996 | 59175197 |
| chr11 | 59176561 | 59176721 |
| chr11 | 59176721 | 59176884 |
| chr11 | 59176944 | 59177157 |
| chr11 | 59183098 | 59183400 |
| chr11 | 59183881 | 59184138 |
| chr11 | 59191171 | 59191429 |
| chr11 | 59191431 | 59191732 |
| chr11 | 59191732 | 59192210 |
| chr11 | 59201815 | 59202020 |
| chr11 | 59202033 | 59202351 |
| chr11 | 59202351 | 59202595 |
| chr11 | 59202595 | 59202814 |
| chr11 | 59202814 | 59203012 |
| chr11 | 59208140 | 59208534 |
| chr11 | 59208534 | 59209000 |
| chr11 | 59209000 | 59209642 |
| chr11 | 59218022 | 59218188 |
| chr11 | 59218334 | 59218678 |
| chr11 | 59218678 | 59219046 |
| chr11 | 59219123 | 59219385 |
| chr11 | 59226283 | 59226579 |
| chr11 | 59226579 | 59226817 |
| chr11 | 59226817 | 59227023 |
| chr11 | 59227811 | 59228178 |
| chr11 | 59228178 | 59228597 |
| chr11 | 59228694 | 59228853 |
| chr11 | 59230492 | 59230705 |
| chr11 | 59238951 | 59239245 |
| chr11 | 59239262 | 59239459 |
| chr11 | 59239484 | 59239728 |
| chr11 | 59255201 | 59255381 |

|       |          |          |
|-------|----------|----------|
| chr11 | 59263864 | 59264089 |
| chr11 | 59264089 | 59264437 |
| chr11 | 59266810 | 59267064 |
| chr11 | 59276746 | 59276897 |
| chr11 | 59276936 | 59277170 |
| chr11 | 59279203 | 59279446 |
| chr11 | 59282161 | 59282476 |
| chr11 | 59282995 | 59283282 |
| chr11 | 59291012 | 59291172 |
| chr11 | 59293650 | 59294281 |
| chr11 | 59298037 | 59298276 |
| chr11 | 59298276 | 59298552 |
| chr11 | 59300332 | 59300484 |
| chr11 | 59302759 | 59303035 |
| chr11 | 59306071 | 59306237 |
| chr11 | 59306531 | 59307076 |
| chr11 | 59307076 | 59307358 |
| chr11 | 59307660 | 59307811 |
| chr11 | 59307822 | 59308150 |
| chr11 | 59308171 | 59308515 |
| chr11 | 59313111 | 59313558 |
| chr11 | 59323104 | 59323312 |
| chr11 | 59323579 | 59323746 |
| chr11 | 59323902 | 59324252 |
| chr11 | 59330485 | 59331022 |
| chr11 | 59334902 | 59335161 |
| chr11 | 59335165 | 59335552 |
| chr11 | 59336010 | 59336239 |
| chr11 | 59336437 | 59336750 |
| chr11 | 59337998 | 59338186 |
| chr11 | 59346164 | 59346576 |
| chr11 | 59346606 | 59346802 |
| chr11 | 59350205 | 59350447 |
| chr11 | 59350447 | 59350742 |
| chr11 | 59356479 | 59356755 |
| chr11 | 59357840 | 59358053 |
| chr11 | 59364914 | 59365093 |
| chr11 | 59366720 | 59366881 |
| chr11 | 59368072 | 59368292 |
| chr11 | 59373694 | 59373884 |
| chr11 | 59377726 | 59377899 |
| chr11 | 59377901 | 59378344 |



|       |          |          |
|-------|----------|----------|
| chr11 | 59384256 | 59385031 |
| chr11 | 59385141 | 59385728 |
| chr11 | 59393603 | 59393852 |
| chr11 | 59396590 | 59396793 |
| chr11 | 59398591 | 59399055 |
| chr11 | 59401709 | 59401864 |
| chr11 | 59402664 | 59403163 |
| chr11 | 59410902 | 59411165 |
| chr11 | 59412094 | 59412448 |
| chr11 | 59412448 | 59412734 |
| chr11 | 59412765 | 59412869 |
| chr11 | 59412869 | 59413032 |
| chr11 | 59413032 | 59413308 |
| chr11 | 59413559 | 59413792 |
| chr11 | 59421945 | 59422305 |
| chr11 | 59424846 | 59425287 |
| chr11 | 59425688 | 59425919 |
| chr11 | 59448638 | 59449039 |
| chr11 | 59449081 | 59449549 |
| chr11 | 59449713 | 59450158 |
| chr11 | 59450158 | 59450599 |
| chr11 | 59450599 | 59450978 |
| chr11 | 59458916 | 59459566 |
| chr11 | 59471461 | 59471630 |
| chr11 | 59471630 | 59471832 |
| chr11 | 59471832 | 59472090 |
| chr11 | 59472090 | 59472372 |
| chr11 | 59472372 | 59472739 |
| chr11 | 59483129 | 59483302 |
| chr11 | 59483320 | 59483568 |
| chr11 | 59484998 | 59485148 |
| chr11 | 59485714 | 59485909 |
| chr11 | 59486264 | 59486584 |
| chr11 | 59491951 | 59492383 |
| chr11 | 59505286 | 59505538 |
| chr11 | 59505538 | 59505924 |
| chr11 | 59505924 | 59506433 |
| chr11 | 59506433 | 59507007 |
| chr11 | 59513636 | 59513895 |
| chr11 | 59520643 | 59521033 |
| chr11 | 59521033 | 59521285 |
| chr11 | 59521306 | 59521456 |

|       |          |          |
|-------|----------|----------|
| chr11 | 59521794 | 59522232 |
| chr11 | 59525267 | 59525614 |
| chr11 | 59526615 | 59526814 |
| chr11 | 59531173 | 59531552 |
| chr11 | 59531552 | 59531893 |
| chr11 | 59544137 | 59544379 |
| chr11 | 59554261 | 59554527 |
| chr11 | 59569378 | 59569608 |
| chr11 | 59571293 | 59571526 |
| chr11 | 59571675 | 59572087 |
| chr11 | 59572196 | 59572435 |
| chr11 | 59600865 | 59601435 |
| chr11 | 59602355 | 59602605 |
| chr11 | 59612212 | 59612595 |
| chr11 | 59614139 | 59614452 |
| chr11 | 59622245 | 59622662 |
| chr11 | 59624103 | 59624574 |
| chr11 | 59634048 | 59634401 |
| chr11 | 59635880 | 59636139 |
| chr11 | 59636139 | 59636535 |
| chr11 | 59636535 | 59636987 |
| chr11 | 59636987 | 59637357 |
| chr11 | 59641351 | 59641503 |
| chr11 | 59642426 | 59642823 |
| chr11 | 59655242 | 59655705 |
| chr11 | 59655705 | 59655957 |
| chr11 | 59656437 | 59656686 |
| chr11 | 59662132 | 59662796 |
| chr11 | 59662899 | 59663389 |
| chr11 | 59671048 | 59671217 |
| chr11 | 59671258 | 59671427 |
| chr11 | 59671427 | 59671627 |
| chr11 | 59693221 | 59693476 |
| chr11 | 59714818 | 59715010 |
| chr11 | 59717690 | 59718061 |
| chr11 | 59718061 | 59718364 |
| chr11 | 59721421 | 59721700 |
| chr11 | 59731636 | 59731796 |
| chr11 | 59731796 | 59731992 |
| chr11 | 59732007 | 59732206 |
| chr11 | 59732717 | 59732939 |
| chr11 | 59732939 | 59733126 |

|       |          |          |
|-------|----------|----------|
| chr11 | 59737236 | 59737454 |
| chr11 | 59744324 | 59744680 |
| chr11 | 59746697 | 59746931 |
| chr11 | 59759203 | 59759414 |
| chr11 | 59759414 | 59759693 |
| chr11 | 59759693 | 59760087 |
| chr11 | 59766600 | 59766781 |
| chr11 | 59769845 | 59770028 |
| chr11 | 59778228 | 59778592 |
| chr11 | 59778592 | 59778919 |
| chr11 | 59778919 | 59779200 |
| chr11 | 59784617 | 59784864 |
| chr11 | 59785577 | 59785809 |
| chr11 | 59786248 | 59786449 |
| chr11 | 59786449 | 59786630 |
| chr11 | 59786630 | 59786880 |
| chr11 | 59786965 | 59787487 |
| chr11 | 59787487 | 59787835 |
| chr11 | 59788952 | 59789102 |
| chr11 | 59791573 | 59791743 |
| chr11 | 59793573 | 59793726 |
| chr11 | 59794889 | 59795088 |
| chr11 | 59795090 | 59795313 |
| chr11 | 59795313 | 59795514 |
| chr11 | 59800488 | 59800713 |
| chr11 | 59801057 | 59801209 |
| chr11 | 59809072 | 59809315 |
| chr11 | 59809315 | 59809619 |
| chr11 | 59809619 | 59810056 |
| chr11 | 59810056 | 59810417 |
| chr11 | 59837454 | 59837690 |
| chr11 | 59838955 | 59839213 |
| chr11 | 59839213 | 59839589 |
| chr11 | 59839589 | 59840022 |
| chr11 | 59847188 | 59847459 |
| chr11 | 59847738 | 59848614 |
| chr11 | 59879982 | 59880453 |
| chr11 | 59892292 | 59892452 |
| chr11 | 59892478 | 59892692 |
| chr11 | 59894722 | 59894997 |
| chr11 | 59913671 | 59914178 |
| chr11 | 59921301 | 59921570 |

|       |          |          |
|-------|----------|----------|
| chr11 | 59932249 | 59932453 |
| chr11 | 59937928 | 59938153 |
| chr11 | 59941624 | 59941860 |
| chr11 | 59941906 | 59942188 |
| chr11 | 59942194 | 59942356 |
| chr11 | 59947797 | 59948391 |
| chr11 | 59948471 | 59948714 |
| chr11 | 59964448 | 59964598 |
| chr11 | 59964632 | 59965192 |
| chr11 | 59965258 | 59965566 |
| chr11 | 59965628 | 59965804 |
| chr11 | 59971006 | 59971194 |
| chr11 | 59971762 | 59971948 |
| chr11 | 59978871 | 59979324 |
| chr11 | 59990282 | 59990460 |
| chr11 | 60011129 | 60011369 |
| chr11 | 60021234 | 60021384 |
| chr11 | 60027178 | 60027637 |
| chr11 | 60045820 | 60046000 |
| chr11 | 60046032 | 60046396 |
| chr11 | 60046396 | 60046773 |
| chr11 | 60058002 | 60058277 |
| chr11 | 60065513 | 60065748 |
| chr11 | 60068755 | 60068969 |
| chr11 | 60070654 | 60070899 |
| chr11 | 60076842 | 60077151 |
| chr11 | 60084665 | 60084902 |
| chr11 | 60089011 | 60089494 |
| chr11 | 60091152 | 60091330 |
| chr11 | 60104763 | 60105024 |
| chr11 | 60105024 | 60105442 |
| chr11 | 60105510 | 60105940 |
| chr11 | 60106062 | 60106263 |
| chr11 | 60106271 | 60106485 |
| chr11 | 60108624 | 60109009 |
| chr11 | 60109009 | 60109379 |
| chr11 | 60112292 | 60112461 |
| chr11 | 60114289 | 60114718 |
| chr11 | 60114718 | 60115115 |
| chr11 | 60115115 | 60115666 |
| chr11 | 60120658 | 60120948 |
| chr11 | 60121039 | 60121199 |

|       |          |          |
|-------|----------|----------|
| chr11 | 60125249 | 60125543 |
| chr11 | 60125623 | 60125917 |
| chr11 | 60127086 | 60127473 |
| chr11 | 60127526 | 60127697 |
| chr11 | 60127887 | 60128225 |
| chr11 | 60134816 | 60135028 |
| chr11 | 60137238 | 60137478 |
| chr11 | 60139736 | 60139952 |
| chr11 | 60139952 | 60140187 |
| chr11 | 60141033 | 60141316 |
| chr11 | 60141316 | 60141599 |
| chr11 | 60142103 | 60142266 |
| chr11 | 60142266 | 60142474 |
| chr11 | 60142474 | 60142754 |
| chr11 | 60143131 | 60143374 |
| chr11 | 60154064 | 60154351 |
| chr11 | 60160481 | 60160725 |
| chr11 | 60165115 | 60165411 |
| chr11 | 60170544 | 60170918 |
| chr11 | 60175683 | 60176040 |
| chr11 | 60176040 | 60176339 |
| chr11 | 60176339 | 60176668 |
| chr11 | 60176668 | 60176976 |
| chr11 | 60178496 | 60178872 |
| chr11 | 60179349 | 60179622 |
| chr11 | 60181158 | 60181319 |
| chr11 | 60185126 | 60185335 |
| chr11 | 60193653 | 60193888 |
| chr11 | 60194513 | 60194689 |
| chr11 | 60195264 | 60195414 |
| chr11 | 60199658 | 60199952 |
| chr11 | 60199952 | 60200298 |
| chr11 | 60200768 | 60201025 |
| chr11 | 60209277 | 60209697 |
| chr11 | 60210242 | 60210829 |
| chr11 | 60210837 | 60210987 |
| chr11 | 60219674 | 60219982 |
| chr11 | 60220039 | 60220242 |
| chr11 | 60220242 | 60220511 |
| chr11 | 60220511 | 60220819 |
| chr11 | 60221658 | 60221850 |
| chr11 | 60222695 | 60223001 |

|       |          |          |
|-------|----------|----------|
| chr11 | 60223001 | 60223254 |
| chr11 | 60228857 | 60229229 |
| chr11 | 60229247 | 60229508 |
| chr11 | 60229752 | 60230211 |
| chr11 | 60244586 | 60244883 |
| chr11 | 60244883 | 60245192 |
| chr11 | 60245192 | 60245464 |
| chr11 | 60247263 | 60247413 |
| chr11 | 60251298 | 60251589 |
| chr11 | 60253575 | 60253872 |
| chr11 | 60253916 | 60254103 |
| chr11 | 60258972 | 60259243 |
| chr11 | 60260761 | 60260993 |
| chr11 | 60273307 | 60273538 |
| chr11 | 60273538 | 60273804 |
| chr11 | 60292819 | 60293074 |
| chr11 | 60296080 | 60296613 |
| chr11 | 60301532 | 60302347 |
| chr11 | 60307912 | 60308445 |
| chr11 | 60308583 | 60309089 |
| chr11 | 60309354 | 60309574 |
| chr11 | 60309985 | 60310166 |
| chr11 | 60311591 | 60311944 |
| chr11 | 60318801 | 60318981 |
| chr11 | 60319567 | 60319809 |
| chr11 | 60319809 | 60320027 |
| chr11 | 60321067 | 60321261 |
| chr11 | 60323766 | 60324062 |
| chr11 | 60339302 | 60339804 |
| chr11 | 60346539 | 60346936 |
| chr11 | 60352429 | 60352794 |
| chr11 | 60352794 | 60353487 |
| chr11 | 60357226 | 60357384 |
| chr11 | 60360087 | 60360239 |
| chr11 | 60367355 | 60367727 |
| chr11 | 60373716 | 60374246 |
| chr11 | 60381828 | 60382055 |
| chr11 | 60382219 | 60382474 |
| chr11 | 60383181 | 60383352 |
| chr11 | 60416622 | 60416990 |
| chr11 | 60416990 | 60417352 |
| chr11 | 60417352 | 60417718 |

|       |          |          |
|-------|----------|----------|
| chr11 | 60417718 | 60418023 |
| chr11 | 60418023 | 60418239 |
| chr11 | 60424927 | 60425247 |
| chr11 | 60436469 | 60437243 |
| chr11 | 60454209 | 60454447 |
| chr11 | 60454447 | 60454734 |
| chr11 | 60454765 | 60455124 |
| chr11 | 60458114 | 60458352 |
| chr11 | 60460755 | 60461054 |
| chr11 | 60465847 | 60466189 |
| chr11 | 60469982 | 60470132 |
| chr11 | 60478255 | 60478496 |
| chr11 | 60480348 | 60480555 |
| chr11 | 60483411 | 60483612 |
| chr11 | 60492971 | 60493412 |
| chr11 | 60493412 | 60493718 |
| chr11 | 60495723 | 60495886 |
| chr11 | 60505107 | 60505450 |
| chr11 | 60505532 | 60505721 |
| chr11 | 60505743 | 60505945 |
| chr11 | 60509550 | 60509818 |
| chr11 | 60514754 | 60515311 |
| chr11 | 60515311 | 60515646 |
| chr11 | 60518221 | 60518667 |
| chr11 | 60520182 | 60520378 |
| chr11 | 60522133 | 60522376 |
| chr11 | 60527286 | 60527570 |
| chr11 | 60527949 | 60528210 |
| chr11 | 60536514 | 60536790 |
| chr11 | 60537108 | 60537395 |
| chr11 | 60537444 | 60537836 |
| chr11 | 60537836 | 60538357 |
| chr11 | 60538366 | 60538581 |
| chr11 | 60538680 | 60539079 |
| chr11 | 60539079 | 60539295 |
| chr11 | 60559365 | 60559739 |
| chr11 | 60563365 | 60563592 |
| chr11 | 60588652 | 60588809 |
| chr11 | 60601746 | 60601900 |
| chr11 | 60630137 | 60630354 |
| chr11 | 60668224 | 60668437 |
| chr11 | 60681276 | 60681477 |

|       |          |          |
|-------|----------|----------|
| chr11 | 60698953 | 60699105 |
| chr11 | 60699515 | 60699863 |
| chr11 | 60699863 | 60700190 |
| chr11 | 60701427 | 60701877 |
| chr11 | 60707040 | 60707603 |
| chr11 | 60707603 | 60708155 |
| chr11 | 60714882 | 60715498 |
| chr11 | 60717165 | 60717372 |
| chr11 | 60726574 | 60726792 |
| chr11 | 60726792 | 60727104 |
| chr11 | 60727104 | 60727417 |
| chr11 | 60727417 | 60727639 |
| chr11 | 60728199 | 60728737 |
| chr11 | 60729229 | 60729485 |
| chr11 | 60729533 | 60729704 |
| chr11 | 60734226 | 60734570 |
| chr11 | 60735330 | 60735480 |
| chr11 | 60739715 | 60740023 |
| chr11 | 60742820 | 60743008 |
| chr11 | 60758128 | 60758310 |
| chr11 | 60758972 | 60759125 |
| chr11 | 60761797 | 60762029 |
| chr11 | 60764803 | 60765121 |
| chr11 | 60769273 | 60770178 |
| chr11 | 60776704 | 60777100 |
| chr11 | 60777100 | 60777540 |
| chr11 | 60777540 | 60777855 |
| chr11 | 60784153 | 60784443 |
| chr11 | 60787678 | 60787910 |
| chr11 | 60794864 | 60795171 |
| chr11 | 60795847 | 60795997 |
| chr11 | 60800061 | 60800249 |
| chr11 | 60810237 | 60810811 |
| chr11 | 60810927 | 60811608 |
| chr11 | 60825260 | 60825555 |
| chr11 | 60830472 | 60830782 |
| chr11 | 60830782 | 60831188 |
| chr11 | 60859777 | 60859962 |
| chr11 | 60861314 | 60861476 |
| chr11 | 60862063 | 60862316 |
| chr11 | 60864187 | 60864381 |
| chr11 | 60878143 | 60878687 |



|       |          |          |
|-------|----------|----------|
| chr11 | 60878687 | 60879385 |
| chr11 | 60879548 | 60879764 |
| chr11 | 60908846 | 60909211 |
| chr11 | 60913337 | 60913959 |
| chr11 | 60914672 | 60914952 |
| chr11 | 60915150 | 60915690 |
| chr11 | 60927395 | 60927581 |
| chr11 | 60930619 | 60931266 |
| chr11 | 60931376 | 60931544 |
| chr11 | 60931748 | 60932187 |
| chr11 | 60933630 | 60933823 |
| chr11 | 60935285 | 60935651 |
| chr11 | 60935651 | 60935895 |
| chr11 | 60939438 | 60939863 |
| chr11 | 60941129 | 60941398 |
| chr11 | 60941398 | 60941759 |
| chr11 | 60951190 | 60951354 |
| chr11 | 60952919 | 60953076 |
| chr11 | 60953076 | 60953245 |
| chr11 | 60953283 | 60953664 |
| chr11 | 60953876 | 60954228 |
| chr11 | 60954520 | 60954712 |
| chr11 | 60959635 | 60959816 |
| chr11 | 60959829 | 60960047 |
| chr11 | 60964373 | 60964576 |
| chr11 | 60964576 | 60964795 |
| chr11 | 60968052 | 60968271 |
| chr11 | 60976781 | 60977012 |
| chr11 | 60977179 | 60977516 |
| chr11 | 60980272 | 60980563 |
| chr11 | 60986036 | 60986564 |
| chr11 | 61011985 | 61012251 |
| chr11 | 61018591 | 61018743 |
| chr11 | 61021835 | 61022064 |
| chr11 | 61041415 | 61041577 |
| chr11 | 61043509 | 61043994 |
| chr11 | 61045116 | 61045330 |
| chr11 | 61046160 | 61046352 |
| chr11 | 61062337 | 61062566 |
| chr11 | 61062616 | 61062861 |
| chr11 | 61068237 | 61068551 |
| chr11 | 61091222 | 61091503 |

|       |          |          |
|-------|----------|----------|
| chr11 | 61091721 | 61091949 |
| chr11 | 61091979 | 61092134 |
| chr11 | 61099498 | 61100025 |
| chr11 | 61100025 | 61100391 |
| chr11 | 61102483 | 61102845 |
| chr11 | 61104352 | 61104619 |
| chr11 | 61119728 | 61120393 |
| chr11 | 61138228 | 61138411 |
| chr11 | 61138905 | 61139154 |
| chr11 | 61140183 | 61140366 |
| chr11 | 61146670 | 61146920 |
| chr11 | 61147292 | 61147641 |
| chr11 | 61150325 | 61150602 |
| chr11 | 61151041 | 61151280 |
| chr11 | 61152177 | 61152355 |
| chr11 | 61155875 | 61156054 |
| chr11 | 61160419 | 61160687 |
| chr11 | 61168516 | 61168671 |
| chr11 | 61169213 | 61169364 |
| chr11 | 61174289 | 61174487 |
| chr11 | 61174487 | 61174831 |
| chr11 | 61174831 | 61175167 |
| chr11 | 61175167 | 61175653 |
| chr11 | 61176269 | 61176759 |
| chr11 | 61192486 | 61192777 |
| chr11 | 61193427 | 61193698 |
| chr11 | 61193698 | 61193891 |
| chr11 | 61199667 | 61200025 |
| chr11 | 61200025 | 61200317 |
| chr11 | 61201096 | 61201532 |
| chr11 | 61202851 | 61203168 |
| chr11 | 61207899 | 61208247 |
| chr11 | 61208247 | 61208904 |
| chr11 | 61215904 | 61216121 |
| chr11 | 61220193 | 61220494 |
| chr11 | 61220494 | 61220888 |
| chr11 | 61228570 | 61228798 |
| chr11 | 61231343 | 61231730 |
| chr11 | 61237493 | 61237645 |
| chr11 | 61260764 | 61261189 |
| chr11 | 61261189 | 61261465 |
| chr11 | 61266564 | 61267010 |

|       |          |          |
|-------|----------|----------|
| chr11 | 61267010 | 61267296 |
| chr11 | 61267296 | 61267654 |
| chr11 | 61273534 | 61273746 |
| chr11 | 61273952 | 61274339 |
| chr11 | 61278511 | 61278805 |
| chr11 | 61278830 | 61278985 |
| chr11 | 61283704 | 61284126 |
| chr11 | 61294523 | 61294732 |
| chr11 | 61297383 | 61297641 |
| chr11 | 61297716 | 61298402 |
| chr11 | 61307862 | 61308158 |
| chr11 | 61320868 | 61321109 |
| chr11 | 61321109 | 61321404 |
| chr11 | 61337736 | 61338088 |
| chr11 | 61342563 | 61342763 |
| chr11 | 61342763 | 61343064 |
| chr11 | 61346215 | 61346368 |
| chr11 | 61349373 | 61349697 |
| chr11 | 61352137 | 61352614 |
| chr11 | 61377905 | 61378191 |
| chr11 | 61378764 | 61378914 |
| chr11 | 61379719 | 61379961 |
| chr11 | 61381339 | 61381593 |
| chr11 | 61407587 | 61408190 |
| chr11 | 61408190 | 61408470 |
| chr11 | 61408470 | 61408741 |
| chr11 | 61408789 | 61408949 |
| chr11 | 61410216 | 61410470 |
| chr11 | 61416603 | 61416759 |
| chr11 | 61417924 | 61418342 |
| chr11 | 61421502 | 61421713 |
| chr11 | 61441743 | 61441995 |
| chr11 | 61443917 | 61444162 |
| chr11 | 61453973 | 61454163 |
| chr11 | 61457526 | 61457759 |
| chr11 | 61473717 | 61473909 |
| chr11 | 61477132 | 61477351 |
| chr11 | 61478288 | 61478524 |
| chr11 | 61487423 | 61487884 |
| chr11 | 61488031 | 61488249 |
| chr11 | 61493528 | 61493956 |
| chr11 | 61493956 | 61494408 |

|       |          |          |
|-------|----------|----------|
| chr11 | 61494408 | 61494677 |
| chr11 | 61494677 | 61494917 |
| chr11 | 61504679 | 61504906 |
| chr11 | 61504906 | 61505090 |
| chr11 | 61505090 | 61505541 |
| chr11 | 61511825 | 61512020 |
| chr11 | 61515032 | 61515360 |
| chr11 | 61518015 | 61518327 |
| chr11 | 61519996 | 61520227 |
| chr11 | 61521293 | 61521576 |
| chr11 | 61521576 | 61521912 |
| chr11 | 61526941 | 61527362 |
| chr11 | 61532785 | 61533343 |
| chr11 | 61539201 | 61539470 |
| chr11 | 61552965 | 61553197 |
| chr11 | 61562416 | 61562729 |
| chr11 | 61562729 | 61562988 |
| chr11 | 61563813 | 61564052 |
| chr11 | 61564052 | 61564388 |
| chr11 | 61564469 | 61565003 |
| chr11 | 61569900 | 61570072 |
| chr11 | 61573062 | 61573273 |
| chr11 | 61578761 | 61579033 |
| chr11 | 61579040 | 61579518 |
| chr11 | 61579518 | 61579916 |
| chr11 | 61597366 | 61597724 |
| chr11 | 61597724 | 61598202 |
| chr11 | 61600297 | 61600551 |
| chr11 | 61602751 | 61603141 |
| chr11 | 61603472 | 61603749 |
| chr11 | 61607844 | 61608475 |
| chr11 | 61608500 | 61608655 |
| chr11 | 61615794 | 61616023 |
| chr11 | 61616023 | 61616179 |
| chr11 | 61616179 | 61616537 |
| chr11 | 61619717 | 61620286 |
| chr11 | 61620286 | 61620684 |
| chr11 | 61628745 | 61628971 |
| chr11 | 61629672 | 61630026 |
| chr11 | 61633861 | 61634189 |
| chr11 | 61636785 | 61636966 |
| chr11 | 61637990 | 61638465 |

|       |          |          |
|-------|----------|----------|
| chr11 | 61642051 | 61642541 |
| chr11 | 61643646 | 61643879 |
| chr11 | 61644308 | 61644479 |
| chr11 | 61644533 | 61644930 |
| chr11 | 61648384 | 61648637 |
| chr11 | 61649682 | 61649912 |
| chr11 | 61658632 | 61658794 |
| chr11 | 61664461 | 61664834 |
| chr11 | 61665043 | 61665195 |
| chr11 | 61666034 | 61666341 |
| chr11 | 61666358 | 61666745 |
| chr11 | 61667320 | 61667530 |
| chr11 | 61673804 | 61673989 |
| chr11 | 61674859 | 61675088 |
| chr11 | 61683885 | 61684227 |
| chr11 | 61684227 | 61684720 |
| chr11 | 61686981 | 61687225 |
| chr11 | 61687225 | 61687512 |
| chr11 | 61687687 | 61687921 |
| chr11 | 61698783 | 61699331 |
| chr11 | 61699331 | 61699761 |
| chr11 | 61699902 | 61700275 |
| chr11 | 61705986 | 61706262 |
| chr11 | 61706262 | 61706565 |
| chr11 | 61709065 | 61709230 |
| chr11 | 61714385 | 61714681 |
| chr11 | 61714681 | 61714977 |
| chr11 | 61732671 | 61732906 |
| chr11 | 61744545 | 61744780 |
| chr11 | 61744957 | 61745215 |
| chr11 | 61745813 | 61746130 |
| chr11 | 61746130 | 61746416 |
| chr11 | 61751691 | 61751922 |
| chr11 | 61760572 | 61760984 |
| chr11 | 61761708 | 61761976 |
| chr11 | 61761976 | 61762492 |
| chr11 | 61778673 | 61778912 |
| chr11 | 61840649 | 61840850 |
| chr11 | 61854030 | 61854461 |
| chr11 | 61854461 | 61854808 |
| chr11 | 61854808 | 61855180 |
| chr11 | 61855180 | 61855460 |

|       |          |          |
|-------|----------|----------|
| chr11 | 61929749 | 61930080 |
| chr11 | 61930080 | 61930652 |
| chr11 | 61930687 | 61930850 |
| chr11 | 61949387 | 61949613 |
| chr11 | 61950691 | 61950999 |
| chr11 | 61953879 | 61954069 |
| chr11 | 61955107 | 61955602 |
| chr11 | 61956625 | 61956912 |
| chr11 | 61956912 | 61957179 |
| chr11 | 61957179 | 61957403 |
| chr11 | 61957501 | 61957702 |
| chr11 | 61970767 | 61970963 |
| chr11 | 61970963 | 61971281 |
| chr11 | 61975186 | 61975353 |
| chr11 | 61975842 | 61976193 |
| chr11 | 61981379 | 61981605 |
| chr11 | 61987011 | 61987271 |
| chr11 | 61998791 | 61999021 |
| chr11 | 61999021 | 61999339 |
| chr11 | 62005245 | 62005573 |
| chr11 | 62005573 | 62006030 |
| chr11 | 62020444 | 62020630 |
| chr11 | 62020704 | 62021037 |
| chr11 | 62023098 | 62023443 |
| chr11 | 62027315 | 62027470 |
| chr11 | 62030979 | 62031182 |
| chr11 | 62037863 | 62038100 |
| chr11 | 62038583 | 62038979 |
| chr11 | 62044714 | 62044996 |
| chr11 | 62047878 | 62048123 |
| chr11 | 62050681 | 62050901 |
| chr11 | 62051080 | 62051240 |
| chr11 | 62051548 | 62051857 |
| chr11 | 62070311 | 62070515 |
| chr11 | 62074639 | 62074907 |
| chr11 | 62075156 | 62075425 |
| chr11 | 62076588 | 62076945 |
| chr11 | 62076945 | 62077212 |
| chr11 | 62077212 | 62077481 |
| chr11 | 62077481 | 62077696 |
| chr11 | 62088714 | 62088957 |
| chr11 | 62090356 | 62090618 |

|       |          |          |
|-------|----------|----------|
| chr11 | 62103625 | 62103805 |
| chr11 | 62106669 | 62106819 |
| chr11 | 62119952 | 62120136 |
| chr11 | 62120136 | 62120326 |
| chr11 | 62120456 | 62120606 |
| chr11 | 62127770 | 62128015 |
| chr11 | 62130286 | 62130449 |
| chr11 | 62130802 | 62131017 |
| chr11 | 62145361 | 62145598 |
| chr11 | 62145716 | 62146094 |
| chr11 | 62146733 | 62146986 |
| chr11 | 62147647 | 62147848 |
| chr11 | 62148118 | 62148392 |
| chr11 | 62150319 | 62150489 |
| chr11 | 62150657 | 62151016 |
| chr11 | 62184627 | 62184909 |
| chr11 | 62184909 | 62185422 |
| chr11 | 62187144 | 62187360 |
| chr11 | 62213496 | 62213656 |
| chr11 | 62217612 | 62218163 |
| chr11 | 62220768 | 62221094 |
| chr11 | 62223999 | 62224309 |
| chr11 | 62232697 | 62232858 |
| chr11 | 62237839 | 62238521 |
| chr11 | 62243860 | 62244146 |
| chr11 | 62248356 | 62248629 |
| chr11 | 62248629 | 62248864 |
| chr11 | 62248864 | 62249236 |
| chr11 | 62249236 | 62249636 |
| chr11 | 62268242 | 62268827 |
| chr11 | 62278128 | 62278405 |
| chr11 | 62280696 | 62280905 |
| chr11 | 62281011 | 62281278 |
| chr11 | 62281278 | 62281595 |
| chr11 | 62281595 | 62281988 |
| chr11 | 62294278 | 62294451 |
| chr11 | 62309142 | 62309709 |
| chr11 | 62332099 | 62332555 |
| chr11 | 62410362 | 62410522 |
| chr11 | 62456548 | 62456874 |
| chr11 | 62456874 | 62457210 |
| chr11 | 62457210 | 62457560 |

|       |          |          |
|-------|----------|----------|
| chr11 | 62457560 | 62457874 |
| chr11 | 62458278 | 62458880 |
| chr11 | 62466522 | 62467028 |
| chr11 | 62471000 | 62471246 |
| chr11 | 62495089 | 62495464 |
| chr11 | 62495546 | 62495841 |
| chr11 | 62496426 | 62496651 |
| chr11 | 62515054 | 62515230 |
| chr11 | 62515230 | 62515455 |
| chr11 | 62515485 | 62515695 |
| chr11 | 62538305 | 62538664 |
| chr11 | 62538664 | 62538915 |
| chr11 | 62538915 | 62539123 |
| chr11 | 62539123 | 62539656 |
| chr11 | 62549751 | 62549968 |
| chr11 | 62549968 | 62550211 |
| chr11 | 62550312 | 62550808 |
| chr11 | 62550808 | 62551288 |
| chr11 | 62551422 | 62551619 |
| chr11 | 62551619 | 62551840 |
| chr11 | 62555367 | 62555530 |
| chr11 | 62556191 | 62556341 |
| chr11 | 62557933 | 62558153 |
| chr11 | 62558613 | 62559036 |
| chr11 | 62559036 | 62559284 |
| chr11 | 62568299 | 62568512 |
| chr11 | 62575319 | 62575617 |
| chr11 | 62575619 | 62576128 |
| chr11 | 62579276 | 62579714 |
| chr11 | 62580537 | 62580861 |
| chr11 | 62581041 | 62581322 |
| chr11 | 62592697 | 62593089 |
| chr11 | 62593205 | 62593434 |
| chr11 | 62602531 | 62603195 |
| chr11 | 62603195 | 62603603 |
| chr11 | 62605572 | 62605839 |
| chr11 | 62606042 | 62606244 |
| chr11 | 62606244 | 62606463 |
| chr11 | 62606551 | 62606701 |
| chr11 | 62609100 | 62609338 |
| chr11 | 62610439 | 62610739 |
| chr11 | 62613688 | 62614082 |



|       |          |          |
|-------|----------|----------|
| chr11 | 62623368 | 62623518 |
| chr11 | 62624284 | 62624506 |
| chr11 | 62624506 | 62624727 |
| chr11 | 62624727 | 62624988 |
| chr11 | 62624988 | 62625272 |
| chr11 | 62637377 | 62637764 |
| chr11 | 62637905 | 62638059 |
| chr11 | 62642451 | 62642670 |
| chr11 | 62643114 | 62643694 |
| chr11 | 62647862 | 62648134 |
| chr11 | 62648134 | 62648491 |
| chr11 | 62648491 | 62648897 |
| chr11 | 62648897 | 62649129 |
| chr11 | 62649129 | 62649317 |
| chr11 | 62654773 | 62655025 |
| chr11 | 62670052 | 62670282 |
| chr11 | 62675580 | 62675816 |
| chr11 | 62675816 | 62676057 |
| chr11 | 62676057 | 62676277 |
| chr11 | 62681980 | 62682234 |
| chr11 | 62693367 | 62693632 |
| chr11 | 62693658 | 62693914 |
| chr11 | 62701241 | 62701572 |
| chr11 | 62731321 | 62731789 |
| chr11 | 62731789 | 62732149 |
| chr11 | 62732711 | 62732987 |
| chr11 | 62733643 | 62733887 |
| chr11 | 62744148 | 62744413 |
| chr11 | 62744457 | 62744642 |
| chr11 | 62745895 | 62746297 |
| chr11 | 62746297 | 62746570 |
| chr11 | 62754532 | 62754754 |
| chr11 | 62756587 | 62757237 |
| chr11 | 62757247 | 62757397 |
| chr11 | 62813963 | 62814478 |
| chr11 | 62814571 | 62815017 |
| chr11 | 62815562 | 62815748 |
| chr11 | 62819966 | 62820577 |
| chr11 | 62820664 | 62821127 |
| chr11 | 62821163 | 62821414 |
| chr11 | 62825235 | 62825553 |
| chr11 | 62825553 | 62825883 |

|       |          |          |
|-------|----------|----------|
| chr11 | 62825883 | 62826226 |
| chr11 | 62831813 | 62832360 |
| chr11 | 62838453 | 62838603 |
| chr11 | 62841562 | 62841712 |
| chr11 | 62846279 | 62846470 |
| chr11 | 62849248 | 62849406 |
| chr11 | 62851285 | 62851517 |
| chr11 | 62867531 | 62867774 |
| chr11 | 62879161 | 62879598 |
| chr11 | 62879598 | 62880049 |
| chr11 | 62901764 | 62901997 |
| chr11 | 62905054 | 62905255 |
| chr11 | 62921077 | 62921369 |
| chr11 | 62921555 | 62921769 |
| chr11 | 62929719 | 62930206 |
| chr11 | 62954610 | 62954764 |
| chr11 | 62996287 | 62996849 |
| chr11 | 63026606 | 63027062 |
| chr11 | 63038339 | 63038589 |
| chr11 | 63052056 | 63052359 |
| chr11 | 63052853 | 63053412 |
| chr11 | 63054773 | 63055009 |
| chr11 | 63099415 | 63099683 |
| chr11 | 63099683 | 63099911 |
| chr11 | 63109466 | 63109797 |
| chr11 | 63114898 | 63115313 |
| chr11 | 63115313 | 63115694 |
| chr11 | 63119805 | 63120057 |
| chr11 | 63122862 | 63123296 |
| chr11 | 63129388 | 63129686 |
| chr11 | 63129986 | 63130282 |
| chr11 | 63130391 | 63130916 |
| chr11 | 63131017 | 63131216 |
| chr11 | 63131335 | 63131568 |
| chr11 | 63135667 | 63136008 |
| chr11 | 63136271 | 63136600 |
| chr11 | 63165178 | 63165405 |
| chr11 | 63170099 | 63170278 |
| chr11 | 63173862 | 63174012 |
| chr11 | 63175374 | 63175546 |
| chr11 | 63213121 | 63213357 |
| chr11 | 63233648 | 63233803 |

|       |          |          |
|-------|----------|----------|
| chr11 | 63253257 | 63253573 |
| chr11 | 63264460 | 63264668 |
| chr11 | 63264705 | 63264966 |
| chr11 | 63404754 | 63404904 |
| chr11 | 63419834 | 63420039 |
| chr11 | 63565548 | 63565774 |
| chr11 | 63565998 | 63566201 |
| chr11 | 63745538 | 63745836 |
| chr11 | 63745932 | 63746140 |
| chr11 | 63782371 | 63782664 |
| chr11 | 63782664 | 63782863 |
| chr11 | 63862135 | 63862318 |
| chr11 | 63862781 | 63863110 |
| chr11 | 63863320 | 63863455 |
| chr11 | 63863455 | 63863591 |
| chr11 | 63914359 | 63914736 |
| chr11 | 63920546 | 63920793 |
| chr11 | 63921804 | 63922026 |
| chr11 | 63922043 | 63922642 |
| chr11 | 63925320 | 63925582 |
| chr11 | 63952153 | 63952367 |
| chr11 | 63952369 | 63952560 |
| chr11 | 63957346 | 63957630 |
| chr11 | 63977776 | 63978289 |
| chr11 | 64027421 | 64027826 |
| chr11 | 64065692 | 64066506 |
| chr11 | 64066847 | 64067006 |
| chr11 | 64067006 | 64067189 |
| chr11 | 64078980 | 64079280 |
| chr11 | 64079280 | 64079712 |
| chr11 | 64079712 | 64080152 |
| chr11 | 64248130 | 64248320 |
| chr11 | 64434968 | 64435386 |
| chr11 | 64435386 | 64435619 |
| chr11 | 64435619 | 64435856 |
| chr11 | 64435860 | 64436170 |
| chr11 | 64436253 | 64436501 |
| chr11 | 64468774 | 64469132 |
| chr11 | 64491070 | 64491296 |
| chr11 | 64496783 | 64497068 |
| chr11 | 64502692 | 64502919 |
| chr11 | 64502945 | 64503419 |

|       |          |          |
|-------|----------|----------|
| chr11 | 64510955 | 64511105 |
| chr11 | 64511321 | 64511528 |
| chr11 | 64599247 | 64599505 |
| chr11 | 64618055 | 64618205 |
| chr11 | 64619978 | 64620363 |
| chr11 | 64703929 | 64704089 |
| chr11 | 64718821 | 64718981 |
| chr11 | 64793210 | 64793409 |
| chr11 | 64890878 | 64891097 |
| chr11 | 64898840 | 64899070 |
| chr11 | 64968531 | 64968882 |
| chr11 | 64971536 | 64971772 |
| chr11 | 64978725 | 64979186 |
| chr11 | 64979186 | 64979556 |
| chr11 | 64987029 | 64987244 |
| chr11 | 65003178 | 65003328 |
| chr11 | 65009258 | 65009526 |
| chr11 | 65016828 | 65017086 |
| chr11 | 65030286 | 65030626 |
| chr11 | 65088990 | 65089235 |
| chr11 | 65089901 | 65090199 |
| chr11 | 65128512 | 65128687 |
| chr11 | 65128694 | 65129075 |
| chr11 | 65129075 | 65129364 |
| chr11 | 65145878 | 65146054 |
| chr11 | 65148613 | 65148822 |
| chr11 | 65153027 | 65153337 |
| chr11 | 65161778 | 65162049 |
| chr11 | 65162049 | 65162354 |
| chr11 | 65162354 | 65162631 |
| chr11 | 65162631 | 65162843 |
| chr11 | 65162843 | 65163105 |
| chr11 | 65195922 | 65196136 |
| chr11 | 65197336 | 65197637 |
| chr11 | 65197676 | 65197991 |
| chr11 | 65209349 | 65209862 |
| chr11 | 65209862 | 65210184 |
| chr11 | 65214975 | 65215346 |
| chr11 | 65215346 | 65215893 |
| chr11 | 65215948 | 65216119 |
| chr11 | 65217484 | 65217701 |
| chr11 | 65236700 | 65236930 |

|       |          |          |
|-------|----------|----------|
| chr11 | 65243639 | 65243811 |
| chr11 | 65245695 | 65246036 |
| chr11 | 65246433 | 65246746 |
| chr11 | 65268367 | 65268683 |
| chr11 | 65271099 | 65271303 |
| chr11 | 65275520 | 65275883 |
| chr11 | 65292677 | 65293013 |
| chr11 | 65293013 | 65293336 |
| chr11 | 65293336 | 65293565 |
| chr11 | 65300698 | 65301091 |
| chr11 | 65338675 | 65339024 |
| chr11 | 65339024 | 65339357 |
| chr11 | 65347026 | 65347221 |
| chr11 | 65365700 | 65366047 |
| chr11 | 65366047 | 65366477 |
| chr11 | 65366678 | 65367184 |
| chr11 | 65375798 | 65376008 |
| chr11 | 65386843 | 65387187 |
| chr11 | 65389289 | 65389500 |
| chr11 | 65447605 | 65447755 |
| chr11 | 65448387 | 65449025 |
| chr11 | 65460343 | 65460597 |
| chr11 | 65476313 | 65476479 |
| chr11 | 65482527 | 65482758 |
| chr11 | 65490613 | 65490992 |
| chr11 | 65492512 | 65492662 |
| chr11 | 65560872 | 65561228 |
| chr11 | 65594649 | 65594854 |
| chr11 | 65598316 | 65598503 |
| chr11 | 65598579 | 65598960 |
| chr11 | 65598960 | 65599217 |
| chr11 | 65631256 | 65631457 |
| chr11 | 65643733 | 65643999 |
| chr11 | 65667380 | 65667677 |
| chr11 | 65667677 | 65667874 |
| chr11 | 65678909 | 65679164 |
| chr11 | 65680419 | 65680760 |
| chr11 | 65725058 | 65725209 |
| chr11 | 65744056 | 65744245 |
| chr11 | 65746742 | 65746924 |
| chr11 | 65784378 | 65784786 |
| chr11 | 65787663 | 65787942 |

|       |          |          |
|-------|----------|----------|
| chr11 | 65787942 | 65788214 |
| chr11 | 65788214 | 65788561 |
| chr11 | 65794334 | 65794655 |
| chr11 | 65794876 | 65795144 |
| chr11 | 65795193 | 65795398 |
| chr11 | 65802015 | 65802236 |
| chr11 | 65806486 | 65806739 |
| chr11 | 65806739 | 65806992 |
| chr11 | 65806992 | 65807268 |
| chr11 | 65807268 | 65807601 |
| chr11 | 65818147 | 65818626 |
| chr11 | 65818637 | 65818788 |
| chr11 | 65818788 | 65818934 |
| chr11 | 65819622 | 65820179 |
| chr11 | 65849920 | 65850156 |
| chr11 | 65852125 | 65852399 |
| chr11 | 65866070 | 65866482 |
| chr11 | 65930855 | 65931085 |
| chr11 | 65972289 | 65972439 |
| chr11 | 66088867 | 66089130 |
| chr11 | 66122169 | 66122324 |
| chr11 | 66167666 | 66168065 |
| chr11 | 66168065 | 66168372 |
| chr11 | 66168372 | 66168746 |
| chr11 | 66188757 | 66188952 |
| chr11 | 66188952 | 66189130 |
| chr11 | 66232910 | 66233158 |
| chr11 | 66233994 | 66234198 |
| chr11 | 66238155 | 66238468 |
| chr11 | 66238750 | 66238942 |
| chr11 | 66258941 | 66259099 |
| chr11 | 66341657 | 66341886 |
| chr11 | 66344888 | 66345205 |
| chr11 | 66359684 | 66360247 |
| chr11 | 66404622 | 66404893 |
| chr11 | 66420927 | 66421311 |
| chr11 | 66433179 | 66433455 |
| chr11 | 66433455 | 66433759 |
| chr11 | 66485225 | 66485530 |
| chr11 | 66485573 | 66485956 |
| chr11 | 66486012 | 66486264 |
| chr11 | 66488938 | 66489327 |

|       |          |          |
|-------|----------|----------|
| chr11 | 66499138 | 66499484 |
| chr11 | 66499851 | 66500059 |
| chr11 | 66525588 | 66525843 |
| chr11 | 66525843 | 66526064 |
| chr11 | 66526064 | 66526277 |
| chr11 | 66526277 | 66526511 |
| chr11 | 66526511 | 66526808 |
| chr11 | 66526808 | 66527222 |
| chr11 | 66551139 | 66551339 |
| chr11 | 66551916 | 66552223 |
| chr11 | 66564989 | 66565219 |
| chr11 | 66790108 | 66790367 |
| chr11 | 66899461 | 66899724 |
| chr11 | 66900675 | 66900854 |
| chr11 | 66900930 | 66901326 |
| chr11 | 66905864 | 66906176 |
| chr11 | 66912542 | 66912827 |
| chr11 | 66914292 | 66914577 |
| chr11 | 66945290 | 66945642 |
| chr11 | 66956189 | 66956798 |
| chr11 | 66966548 | 66967195 |
| chr11 | 66968600 | 66968860 |
| chr11 | 66971994 | 66972377 |
| chr11 | 66980590 | 66981049 |
| chr11 | 66983894 | 66984131 |
| chr11 | 66984142 | 66984488 |
| chr11 | 66984918 | 66985158 |
| chr11 | 66996640 | 66996866 |
| chr11 | 66998279 | 66998835 |
| chr11 | 66998847 | 66999066 |
| chr11 | 67006809 | 67007039 |
| chr11 | 67017739 | 67018207 |
| chr11 | 67018292 | 67018466 |
| chr11 | 67021048 | 67021209 |
| chr11 | 67024811 | 67025461 |
| chr11 | 67031026 | 67031374 |
| chr11 | 67031374 | 67031628 |
| chr11 | 67031628 | 67031884 |
| chr11 | 67034852 | 67035022 |
| chr11 | 67052039 | 67052217 |
| chr11 | 67052269 | 67053115 |
| chr11 | 67080300 | 67080542 |

|       |          |          |
|-------|----------|----------|
| chr11 | 67081056 | 67081206 |
| chr11 | 67081244 | 67081666 |
| chr11 | 67085497 | 67085754 |
| chr11 | 67101828 | 67102029 |
| chr11 | 67110221 | 67110569 |
| chr11 | 67112066 | 67112363 |
| chr11 | 67112783 | 67113079 |
| chr11 | 67165118 | 67165299 |
| chr11 | 67323973 | 67324123 |
| chr11 | 67350471 | 67350707 |
| chr11 | 67353095 | 67353301 |
| chr11 | 67373340 | 67373648 |
| chr11 | 67379961 | 67380190 |
| chr11 | 67380190 | 67380390 |
| chr11 | 67403972 | 67404504 |
| chr11 | 67414050 | 67414202 |
| chr11 | 67425767 | 67425936 |
| chr11 | 67428334 | 67428489 |
| chr11 | 67454734 | 67455175 |
| chr11 | 67455175 | 67455455 |
| chr11 | 67455455 | 67455763 |
| chr11 | 67455799 | 67455949 |
| chr11 | 67498072 | 67498223 |
| chr11 | 67514571 | 67514762 |
| chr11 | 67515203 | 67515652 |
| chr11 | 67515652 | 67515984 |
| chr11 | 67521636 | 67521872 |
| chr11 | 67522014 | 67522406 |
| chr11 | 67522689 | 67523009 |
| chr11 | 67526603 | 67526922 |
| chr11 | 67527010 | 67527326 |
| chr11 | 67527326 | 67527579 |
| chr11 | 67529354 | 67529586 |
| chr11 | 67532244 | 67532645 |
| chr11 | 67532645 | 67533253 |
| chr11 | 67534978 | 67535229 |
| chr11 | 67538628 | 67539063 |
| chr11 | 67544695 | 67544890 |
| chr11 | 67544897 | 67545428 |
| chr11 | 67545802 | 67545952 |
| chr11 | 67549306 | 67549826 |
| chr11 | 67549826 | 67550447 |



|       |          |          |
|-------|----------|----------|
| chr11 | 67558163 | 67558344 |
| chr11 | 67563019 | 67563728 |
| chr11 | 67570984 | 67571166 |
| chr11 | 67588112 | 67588307 |
| chr11 | 67588894 | 67589215 |
| chr11 | 67600770 | 67600999 |
| chr11 | 67601091 | 67601448 |
| chr11 | 67622373 | 67622647 |
| chr11 | 67647794 | 67648112 |
| chr11 | 67650398 | 67650573 |
| chr11 | 67652352 | 67652600 |
| chr11 | 67656180 | 67656340 |
| chr11 | 67657602 | 67658091 |
| chr11 | 67658195 | 67658394 |
| chr11 | 67676201 | 67676489 |
| chr11 | 67679979 | 67680352 |
| chr11 | 67701427 | 67701670 |
| chr11 | 67738784 | 67738935 |
| chr11 | 67772630 | 67772864 |
| chr11 | 67819559 | 67819826 |
| chr11 | 67819826 | 67820047 |
| chr11 | 67820199 | 67820514 |
| chr11 | 67828040 | 67828277 |
| chr11 | 67828284 | 67828655 |
| chr11 | 67828655 | 67829045 |
| chr11 | 67838156 | 67838416 |
| chr11 | 67839863 | 67840175 |
| chr11 | 67855112 | 67855370 |
| chr11 | 67860748 | 67861091 |
| chr11 | 67861091 | 67861414 |
| chr11 | 67861414 | 67861892 |
| chr11 | 67862242 | 67862441 |
| chr11 | 67865633 | 67865833 |
| chr11 | 67879908 | 67880392 |
| chr11 | 67896809 | 67897317 |
| chr11 | 67897317 | 67897616 |
| chr11 | 67911033 | 67911557 |
| chr11 | 67911571 | 67911736 |
| chr11 | 67919679 | 67919988 |
| chr11 | 67920225 | 67920537 |
| chr11 | 67921438 | 67921801 |
| chr11 | 67921801 | 67922127 |

|       |          |          |
|-------|----------|----------|
| chr11 | 67922127 | 67922434 |
| chr11 | 67922434 | 67922696 |
| chr11 | 67922791 | 67923099 |
| chr11 | 67939123 | 67939313 |
| chr11 | 67945537 | 67945831 |
| chr11 | 67946123 | 67946273 |
| chr11 | 67946686 | 67946867 |
| chr11 | 67947105 | 67947476 |
| chr11 | 67948371 | 67948660 |
| chr11 | 67964185 | 67964423 |
| chr11 | 67965331 | 67965550 |
| chr11 | 67965550 | 67965787 |
| chr11 | 67966249 | 67966577 |
| chr11 | 67966577 | 67966797 |
| chr11 | 67975017 | 67975282 |
| chr11 | 67982662 | 67982836 |
| chr11 | 68004244 | 68004494 |
| chr11 | 68008012 | 68008183 |
| chr11 | 68008690 | 68009083 |
| chr11 | 68030689 | 68031080 |
| chr11 | 68032566 | 68032869 |
| chr11 | 68035376 | 68035913 |
| chr11 | 68036505 | 68036867 |
| chr11 | 68045677 | 68046038 |
| chr11 | 68071875 | 68072208 |
| chr11 | 68072208 | 68072487 |
| chr11 | 68072487 | 68072784 |
| chr11 | 68081571 | 68081893 |
| chr11 | 68083302 | 68083653 |
| chr11 | 68083653 | 68083919 |
| chr11 | 68089853 | 68090448 |
| chr11 | 68092028 | 68092384 |
| chr11 | 68092384 | 68092699 |
| chr11 | 68095132 | 68095288 |
| chr11 | 68099533 | 68099763 |
| chr11 | 68114319 | 68114541 |
| chr11 | 68124963 | 68125118 |
| chr11 | 68155815 | 68156187 |
| chr11 | 68176614 | 68176837 |
| chr11 | 68183234 | 68183487 |
| chr11 | 68195223 | 68195440 |
| chr11 | 68199207 | 68199428 |

|       |          |          |
|-------|----------|----------|
| chr11 | 68210103 | 68210258 |
| chr11 | 68211908 | 68212207 |
| chr11 | 68212255 | 68212553 |
| chr11 | 68214014 | 68214234 |
| chr11 | 68215256 | 68215478 |
| chr11 | 68216288 | 68216608 |
| chr11 | 68220786 | 68221153 |
| chr11 | 68223284 | 68223453 |
| chr11 | 68231630 | 68231860 |
| chr11 | 68244610 | 68244881 |
| chr11 | 68244881 | 68245359 |
| chr11 | 68258826 | 68259164 |
| chr11 | 68259167 | 68259367 |
| chr11 | 68272565 | 68272720 |
| chr11 | 68300436 | 68300657 |
| chr11 | 68313409 | 68313804 |
| chr11 | 68313804 | 68314188 |
| chr11 | 68314188 | 68314457 |
| chr11 | 68319362 | 68319635 |
| chr11 | 68324934 | 68325161 |
| chr11 | 68333483 | 68333904 |
| chr11 | 68339919 | 68340091 |
| chr11 | 68385202 | 68385777 |
| chr11 | 68385777 | 68386319 |
| chr11 | 68386349 | 68386550 |
| chr11 | 68386602 | 68387419 |
| chr11 | 68394902 | 68395056 |
| chr11 | 68395244 | 68395501 |
| chr11 | 68399687 | 68400056 |
| chr11 | 68400056 | 68400345 |
| chr11 | 68400345 | 68400666 |
| chr11 | 68404295 | 68404466 |
| chr11 | 68408201 | 68408484 |
| chr11 | 68417930 | 68418114 |
| chr11 | 68427131 | 68427424 |
| chr11 | 68431880 | 68432180 |
| chr11 | 68432180 | 68432403 |
| chr11 | 68432403 | 68432626 |
| chr11 | 68432626 | 68432845 |
| chr11 | 68438614 | 68438848 |
| chr11 | 68445706 | 68446180 |
| chr11 | 68446197 | 68446399 |

|       |          |          |
|-------|----------|----------|
| chr11 | 68446511 | 68446906 |
| chr11 | 68451811 | 68451974 |
| chr11 | 68458090 | 68458550 |
| chr11 | 68467523 | 68467883 |
| chr11 | 68468204 | 68468550 |
| chr11 | 68468741 | 68469337 |
| chr11 | 68485121 | 68485272 |
| chr11 | 68485302 | 68485553 |
| chr11 | 68488051 | 68488446 |
| chr11 | 68488446 | 68488744 |
| chr11 | 68500898 | 68501137 |
| chr11 | 68502205 | 68502373 |
| chr11 | 68531282 | 68531486 |
| chr11 | 68531486 | 68531762 |
| chr11 | 68532005 | 68532436 |
| chr11 | 68536505 | 68536765 |
| chr11 | 68538917 | 68539560 |
| chr11 | 68544638 | 68544863 |
| chr11 | 68554199 | 68554349 |
| chr11 | 68555864 | 68556574 |
| chr11 | 68566279 | 68566429 |
| chr11 | 68566484 | 68566736 |
| chr11 | 68566736 | 68566965 |
| chr11 | 68573239 | 68573396 |
| chr11 | 68586042 | 68586255 |
| chr11 | 68589489 | 68589748 |
| chr11 | 68623525 | 68623863 |
| chr11 | 68638018 | 68638216 |
| chr11 | 68681153 | 68681347 |
| chr11 | 68681351 | 68681676 |
| chr11 | 68682209 | 68682431 |
| chr11 | 68691285 | 68691660 |
| chr11 | 68691660 | 68692390 |
| chr11 | 68716059 | 68716366 |
| chr11 | 68750362 | 68750512 |
| chr11 | 68750550 | 68750708 |
| chr11 | 68769957 | 68770591 |
| chr11 | 68782489 | 68782724 |
| chr11 | 68786881 | 68787358 |
| chr11 | 68796609 | 68796847 |
| chr11 | 68796847 | 68797141 |
| chr11 | 68799418 | 68799528 |

|       |          |          |
|-------|----------|----------|
| chr11 | 68799528 | 68799572 |
| chr11 | 68805251 | 68805420 |
| chr11 | 68807780 | 68808181 |
| chr11 | 68811960 | 68812207 |
| chr11 | 68817862 | 68818189 |
| chr11 | 68818202 | 68818428 |
| chr11 | 68818428 | 68818619 |
| chr11 | 68822416 | 68822602 |
| chr11 | 68825475 | 68825625 |
| chr11 | 68825765 | 68826149 |
| chr11 | 68826501 | 68826765 |
| chr11 | 68839657 | 68840014 |
| chr11 | 68847018 | 68847210 |
| chr11 | 68852432 | 68852849 |
| chr11 | 68852849 | 68853414 |
| chr11 | 68853726 | 68853905 |
| chr11 | 68854093 | 68854496 |
| chr11 | 68859897 | 68860499 |
| chr11 | 68863739 | 68864071 |
| chr11 | 68864727 | 68865262 |
| chr11 | 68871791 | 68872164 |
| chr11 | 68872991 | 68873506 |
| chr11 | 68874946 | 68875173 |
| chr11 | 68889828 | 68890073 |
| chr11 | 68890646 | 68891001 |
| chr11 | 68892065 | 68892418 |
| chr11 | 68894049 | 68894412 |
| chr11 | 68896810 | 68897081 |
| chr11 | 68897227 | 68897377 |
| chr11 | 68901128 | 68901487 |
| chr11 | 68901487 | 68901681 |
| chr11 | 68901681 | 68901911 |
| chr11 | 68904805 | 68905039 |
| chr11 | 68905843 | 68906183 |
| chr11 | 68906400 | 68906963 |
| chr11 | 68918955 | 68919125 |
| chr11 | 68933861 | 68934005 |
| chr11 | 68934005 | 68934158 |
| chr11 | 68939480 | 68939708 |
| chr11 | 68939708 | 68940163 |
| chr11 | 68946804 | 68947340 |
| chr11 | 68947492 | 68947642 |

|       |          |          |
|-------|----------|----------|
| chr11 | 68951379 | 68951569 |
| chr11 | 68954416 | 68954789 |
| chr11 | 68955482 | 68955703 |
| chr11 | 68955703 | 68955973 |
| chr11 | 68957034 | 68957184 |
| chr11 | 68961521 | 68961919 |
| chr11 | 68967550 | 68967918 |
| chr11 | 68967918 | 68968253 |
| chr11 | 68973205 | 68973522 |
| chr11 | 68973522 | 68973760 |
| chr11 | 68973760 | 68974033 |
| chr11 | 68981005 | 68981257 |
| chr11 | 68982550 | 68982949 |
| chr11 | 68982949 | 68983208 |
| chr11 | 68994492 | 68994696 |
| chr11 | 69008146 | 69008925 |
| chr11 | 69012362 | 69012665 |
| chr11 | 69015727 | 69016194 |
| chr11 | 69016194 | 69016482 |
| chr11 | 69028778 | 69029179 |
| chr11 | 69035951 | 69036210 |
| chr11 | 69036941 | 69037141 |
| chr11 | 69037307 | 69037618 |
| chr11 | 69037768 | 69037992 |
| chr11 | 69040008 | 69040513 |
| chr11 | 69040513 | 69040797 |
| chr11 | 69040906 | 69041172 |
| chr11 | 69041172 | 69041399 |
| chr11 | 69041639 | 69041922 |
| chr11 | 69045437 | 69045784 |
| chr11 | 69045784 | 69046148 |
| chr11 | 69046452 | 69046634 |
| chr11 | 69053935 | 69054127 |
| chr11 | 69059151 | 69059359 |
| chr11 | 69059382 | 69060002 |
| chr11 | 69060032 | 69060388 |
| chr11 | 69060456 | 69060865 |
| chr11 | 69062280 | 69062446 |
| chr11 | 69062563 | 69062757 |
| chr11 | 69062757 | 69062942 |
| chr11 | 69062942 | 69063263 |
| chr11 | 69063500 | 69063702 |

|       |          |          |
|-------|----------|----------|
| chr11 | 69063917 | 69064098 |
| chr11 | 69067031 | 69067195 |
| chr11 | 69070620 | 69070907 |
| chr11 | 69070907 | 69071178 |
| chr11 | 69073111 | 69073283 |
| chr11 | 69073365 | 69074117 |
| chr11 | 69078916 | 69079205 |
| chr11 | 69088187 | 69088654 |
| chr11 | 69088654 | 69088924 |
| chr11 | 69088929 | 69089178 |
| chr11 | 69089298 | 69089577 |
| chr11 | 69094679 | 69095033 |
| chr11 | 69095033 | 69095373 |
| chr11 | 69096967 | 69097338 |
| chr11 | 69097611 | 69097801 |
| chr11 | 69098580 | 69099034 |
| chr11 | 69099892 | 69100235 |
| chr11 | 69100304 | 69100509 |
| chr11 | 69102392 | 69102699 |
| chr11 | 69108880 | 69109174 |
| chr11 | 69110335 | 69110730 |
| chr11 | 69110730 | 69111086 |
| chr11 | 69117872 | 69118255 |
| chr11 | 69118470 | 69118620 |
| chr11 | 69118750 | 69119041 |
| chr11 | 69122273 | 69122684 |
| chr11 | 69122684 | 69123023 |
| chr11 | 69123709 | 69124003 |
| chr11 | 69124134 | 69124459 |
| chr11 | 69124532 | 69124726 |
| chr11 | 69125119 | 69125368 |
| chr11 | 69125368 | 69125680 |
| chr11 | 69125680 | 69125970 |
| chr11 | 69125970 | 69126273 |
| chr11 | 69133540 | 69133906 |
| chr11 | 69133906 | 69134222 |
| chr11 | 69134222 | 69134455 |
| chr11 | 69134455 | 69134710 |
| chr11 | 69142567 | 69142743 |
| chr11 | 69143641 | 69144103 |
| chr11 | 69150577 | 69150783 |
| chr11 | 69150783 | 69150997 |

|       |          |          |
|-------|----------|----------|
| chr11 | 69150997 | 69151364 |
| chr11 | 69153970 | 69154566 |
| chr11 | 69160457 | 69160954 |
| chr11 | 69171690 | 69171894 |
| chr11 | 69172657 | 69172951 |
| chr11 | 69174717 | 69174962 |
| chr11 | 69174962 | 69175288 |
| chr11 | 69175288 | 69175618 |
| chr11 | 69180185 | 69180404 |
| chr11 | 69180688 | 69180861 |
| chr11 | 69192973 | 69193179 |
| chr11 | 69196873 | 69197159 |
| chr11 | 69197287 | 69197664 |
| chr11 | 69213351 | 69213610 |
| chr11 | 69235202 | 69235495 |
| chr11 | 69235495 | 69235719 |
| chr11 | 69235719 | 69235936 |
| chr11 | 69235936 | 69236188 |
| chr11 | 69238567 | 69238752 |
| chr11 | 69245019 | 69245252 |
| chr11 | 69253112 | 69253469 |
| chr11 | 69257861 | 69258014 |
| chr11 | 69258378 | 69258660 |
| chr11 | 69259466 | 69259805 |
| chr11 | 69260110 | 69260478 |
| chr11 | 69264407 | 69264581 |
| chr11 | 69267431 | 69267644 |
| chr11 | 69269641 | 69270019 |
| chr11 | 69272378 | 69272734 |
| chr11 | 69276122 | 69276339 |
| chr11 | 69301077 | 69301331 |
| chr11 | 69316251 | 69316580 |
| chr11 | 69323651 | 69324274 |
| chr11 | 69325722 | 69325948 |
| chr11 | 69326091 | 69326403 |
| chr11 | 69326473 | 69326716 |
| chr11 | 69327727 | 69327904 |
| chr11 | 69334005 | 69334248 |
| chr11 | 69334391 | 69334785 |
| chr11 | 69334785 | 69335226 |
| chr11 | 69339621 | 69339867 |
| chr11 | 69340079 | 69340549 |



|       |          |          |
|-------|----------|----------|
| chr11 | 69340549 | 69341168 |
| chr11 | 69342037 | 69342251 |
| chr11 | 69342718 | 69343006 |
| chr11 | 69362580 | 69362847 |
| chr11 | 69364961 | 69365305 |
| chr11 | 69365401 | 69365789 |
| chr11 | 69365789 | 69366057 |
| chr11 | 69366226 | 69366456 |
| chr11 | 69366456 | 69366938 |
| chr11 | 69367993 | 69368278 |
| chr11 | 69368354 | 69368619 |
| chr11 | 69368810 | 69369092 |
| chr11 | 69377576 | 69377835 |
| chr11 | 69377835 | 69378248 |
| chr11 | 69382614 | 69383228 |
| chr11 | 69390298 | 69390620 |
| chr11 | 69395305 | 69395563 |
| chr11 | 69395627 | 69395928 |
| chr11 | 69395928 | 69396224 |
| chr11 | 69396224 | 69396454 |
| chr11 | 69397625 | 69397869 |
| chr11 | 69397869 | 69398152 |
| chr11 | 69398172 | 69398341 |
| chr11 | 69401213 | 69401821 |
| chr11 | 69401859 | 69402107 |
| chr11 | 69408547 | 69409116 |
| chr11 | 69409133 | 69409445 |
| chr11 | 69409445 | 69409770 |
| chr11 | 69409770 | 69410018 |
| chr11 | 69410363 | 69410669 |
| chr11 | 69410669 | 69411095 |
| chr11 | 69411095 | 69411464 |
| chr11 | 69411631 | 69412010 |
| chr11 | 69417537 | 69417855 |
| chr11 | 69417858 | 69418309 |
| chr11 | 69418503 | 69418811 |
| chr11 | 69418811 | 69419178 |
| chr11 | 69419178 | 69419481 |
| chr11 | 69419485 | 69419645 |
| chr11 | 69428814 | 69429085 |
| chr11 | 69432085 | 69432401 |
| chr11 | 69432414 | 69432609 |

|       |          |          |
|-------|----------|----------|
| chr11 | 69442799 | 69443072 |
| chr11 | 69443239 | 69444002 |
| chr11 | 69452553 | 69452713 |
| chr11 | 69459395 | 69459707 |
| chr11 | 69471532 | 69471795 |
| chr11 | 69472424 | 69473210 |
| chr11 | 69479289 | 69479502 |
| chr11 | 69482640 | 69482879 |
| chr11 | 69483063 | 69483221 |
| chr11 | 69484209 | 69484542 |
| chr11 | 69490938 | 69491154 |
| chr11 | 69492887 | 69493152 |
| chr11 | 69502729 | 69502912 |
| chr11 | 69503841 | 69504146 |
| chr11 | 69513908 | 69514171 |
| chr11 | 69530880 | 69531091 |
| chr11 | 69535124 | 69535294 |
| chr11 | 69541571 | 69541778 |
| chr11 | 69546037 | 69546348 |
| chr11 | 69546348 | 69546737 |
| chr11 | 69546737 | 69547101 |
| chr11 | 69547101 | 69547410 |
| chr11 | 69554751 | 69554952 |
| chr11 | 69554952 | 69555146 |
| chr11 | 69561282 | 69561695 |
| chr11 | 69575322 | 69575490 |
| chr11 | 69578578 | 69578777 |
| chr11 | 69578897 | 69579619 |
| chr11 | 69580150 | 69580490 |
| chr11 | 69580490 | 69580776 |
| chr11 | 69581107 | 69581367 |
| chr11 | 69581367 | 69581688 |
| chr11 | 69592399 | 69592718 |
| chr11 | 69598601 | 69598919 |
| chr11 | 69604432 | 69604657 |
| chr11 | 69605186 | 69605339 |
| chr11 | 69605808 | 69606140 |
| chr11 | 69613626 | 69613849 |
| chr11 | 69613991 | 69614262 |
| chr11 | 69616884 | 69617056 |
| chr11 | 69628370 | 69628596 |
| chr11 | 69632372 | 69632959 |

|       |          |          |
|-------|----------|----------|
| chr11 | 69632959 | 69633470 |
| chr11 | 69646958 | 69647126 |
| chr11 | 69654892 | 69655064 |
| chr11 | 69655428 | 69655680 |
| chr11 | 69656236 | 69656419 |
| chr11 | 69656780 | 69657192 |
| chr11 | 69657287 | 69657682 |
| chr11 | 69662238 | 69662452 |
| chr11 | 69662490 | 69662936 |
| chr11 | 69663865 | 69664156 |
| chr11 | 69665876 | 69666641 |
| chr11 | 69671172 | 69671683 |
| chr11 | 69671842 | 69672028 |
| chr11 | 69672028 | 69672354 |
| chr11 | 69672354 | 69672778 |
| chr11 | 69681543 | 69682306 |
| chr11 | 69682836 | 69683069 |
| chr11 | 69685500 | 69685910 |
| chr11 | 69685990 | 69686181 |
| chr11 | 69687159 | 69687341 |
| chr11 | 69691017 | 69691294 |
| chr11 | 69695511 | 69695725 |
| chr11 | 69695863 | 69696166 |
| chr11 | 69700755 | 69700975 |
| chr11 | 69706735 | 69707239 |
| chr11 | 69715584 | 69715815 |
| chr11 | 69715896 | 69716279 |
| chr11 | 69717056 | 69717258 |
| chr11 | 69723205 | 69723367 |
| chr11 | 69726024 | 69726320 |
| chr11 | 69729145 | 69729383 |
| chr11 | 69731487 | 69731708 |
| chr11 | 69734342 | 69734614 |
| chr11 | 69736560 | 69736761 |
| chr11 | 69751206 | 69751374 |
| chr11 | 69752746 | 69753007 |
| chr11 | 69758079 | 69758518 |
| chr11 | 69758518 | 69758926 |
| chr11 | 69758926 | 69759290 |
| chr11 | 69759321 | 69759668 |
| chr11 | 69760182 | 69760401 |
| chr11 | 69765534 | 69765858 |

|       |          |          |
|-------|----------|----------|
| chr11 | 69765858 | 69766141 |
| chr11 | 69766141 | 69766378 |
| chr11 | 69766378 | 69766812 |
| chr11 | 69776660 | 69776948 |
| chr11 | 69777261 | 69777485 |
| chr11 | 69778602 | 69778848 |
| chr11 | 69778866 | 69779057 |
| chr11 | 69784904 | 69785097 |
| chr11 | 69785097 | 69785299 |
| chr11 | 69795207 | 69795724 |
| chr11 | 69795797 | 69796099 |
| chr11 | 69797982 | 69798300 |
| chr11 | 69802830 | 69803107 |
| chr11 | 69803526 | 69803809 |
| chr11 | 69803809 | 69804142 |
| chr11 | 69804142 | 69804450 |
| chr11 | 69804531 | 69804853 |
| chr11 | 69805152 | 69805320 |
| chr11 | 69805320 | 69805440 |
| chr11 | 69805440 | 69805528 |
| chr11 | 69805530 | 69805873 |
| chr11 | 69815353 | 69815539 |
| chr11 | 69818981 | 69819165 |
| chr11 | 69825685 | 69825854 |
| chr11 | 69828798 | 69828973 |
| chr11 | 69837372 | 69837944 |
| chr11 | 69837944 | 69838265 |
| chr11 | 69838265 | 69838729 |
| chr11 | 69838841 | 69839016 |
| chr11 | 69845475 | 69845686 |
| chr11 | 69846011 | 69846418 |
| chr11 | 69846418 | 69846736 |
| chr11 | 69846755 | 69847043 |
| chr11 | 69847043 | 69847299 |
| chr11 | 69849149 | 69849374 |
| chr11 | 69857941 | 69858115 |
| chr11 | 69858124 | 69858391 |
| chr11 | 69858391 | 69858656 |
| chr11 | 69858656 | 69859068 |
| chr11 | 69872225 | 69872456 |
| chr11 | 69872479 | 69872847 |
| chr11 | 69876933 | 69877202 |

|       |          |          |
|-------|----------|----------|
| chr11 | 69880545 | 69880896 |
| chr11 | 69880896 | 69881295 |
| chr11 | 69881295 | 69881684 |
| chr11 | 69883753 | 69884087 |
| chr11 | 69884087 | 69884337 |
| chr11 | 69887338 | 69887544 |
| chr11 | 69894705 | 69894925 |
| chr11 | 69895470 | 69895683 |
| chr11 | 69900385 | 69900837 |
| chr11 | 69900837 | 69901205 |
| chr11 | 69901205 | 69901541 |
| chr11 | 69901541 | 69901988 |
| chr11 | 69902031 | 69902202 |
| chr11 | 69902202 | 69902302 |
| chr11 | 69913325 | 69913573 |
| chr11 | 69913645 | 69914140 |
| chr11 | 69914140 | 69914446 |
| chr11 | 69914446 | 69914735 |
| chr11 | 69915078 | 69915296 |
| chr11 | 69915802 | 69916019 |
| chr11 | 69919603 | 69920110 |
| chr11 | 69920559 | 69921056 |
| chr11 | 69921056 | 69921511 |
| chr11 | 69921511 | 69922071 |
| chr11 | 69927613 | 69927849 |
| chr11 | 69933697 | 69933979 |
| chr11 | 69934177 | 69934625 |
| chr11 | 69935189 | 69935516 |
| chr11 | 69935516 | 69936127 |
| chr11 | 69936346 | 69936505 |
| chr11 | 69948084 | 69948410 |
| chr11 | 69948410 | 69948696 |
| chr11 | 69948696 | 69948945 |
| chr11 | 69948945 | 69949232 |
| chr11 | 69951212 | 69951362 |
| chr11 | 69952360 | 69952584 |
| chr11 | 69953457 | 69953626 |
| chr11 | 69953775 | 69953933 |
| chr11 | 69955680 | 69956000 |
| chr11 | 69961476 | 69961719 |
| chr11 | 69961904 | 69962203 |
| chr11 | 69964676 | 69964973 |

|       |          |          |
|-------|----------|----------|
| chr11 | 69965157 | 69965729 |
| chr11 | 69965991 | 69966365 |
| chr11 | 69966535 | 69966969 |
| chr11 | 69979971 | 69980414 |
| chr11 | 69980414 | 69980653 |
| chr11 | 69980653 | 69980894 |
| chr11 | 69980894 | 69981172 |
| chr11 | 69990806 | 69991114 |
| chr11 | 69991364 | 69991713 |
| chr11 | 69991731 | 69991924 |
| chr11 | 69995363 | 69995635 |
| chr11 | 69995635 | 69995922 |
| chr11 | 69996844 | 69997123 |
| chr11 | 69997123 | 69997587 |
| chr11 | 70000363 | 70000888 |
| chr11 | 70001912 | 70002192 |
| chr11 | 70005578 | 70005849 |
| chr11 | 70014520 | 70014682 |
| chr11 | 70014851 | 70015063 |
| chr11 | 70015063 | 70015281 |
| chr11 | 70015281 | 70015590 |
| chr11 | 70020750 | 70021049 |
| chr11 | 70021105 | 70021462 |
| chr11 | 70021462 | 70021981 |
| chr11 | 70028697 | 70029148 |
| chr11 | 70029148 | 70029491 |
| chr11 | 70029491 | 70029874 |
| chr11 | 70052435 | 70052784 |
| chr11 | 70055641 | 70055890 |
| chr11 | 70055890 | 70056081 |
| chr11 | 70074729 | 70075128 |
| chr11 | 70075553 | 70075890 |
| chr11 | 70075927 | 70076092 |
| chr11 | 70079261 | 70079460 |
| chr11 | 70083191 | 70083406 |
| chr11 | 70087795 | 70088024 |
| chr11 | 70106976 | 70107150 |
| chr11 | 70110227 | 70110460 |
| chr11 | 70114458 | 70114638 |
| chr11 | 70114638 | 70114839 |
| chr11 | 70141959 | 70142141 |
| chr11 | 70151161 | 70151422 |

|       |          |          |
|-------|----------|----------|
| chr11 | 70171910 | 70172178 |
| chr11 | 70173690 | 70173898 |
| chr11 | 70179563 | 70179713 |
| chr11 | 70183776 | 70183995 |
| chr11 | 70189039 | 70189772 |
| chr11 | 70193961 | 70194279 |
| chr11 | 70198268 | 70198846 |
| chr11 | 70201687 | 70201900 |
| chr11 | 70208968 | 70209410 |
| chr11 | 70209410 | 70209698 |
| chr11 | 70210683 | 70211142 |
| chr11 | 70213012 | 70213221 |
| chr11 | 70220415 | 70220663 |
| chr11 | 70220663 | 70220969 |
| chr11 | 70220969 | 70221498 |
| chr11 | 70226187 | 70226342 |
| chr11 | 70226408 | 70226780 |
| chr11 | 70228938 | 70229193 |
| chr11 | 70230216 | 70230783 |
| chr11 | 70237333 | 70238084 |
| chr11 | 70238084 | 70238337 |
| chr11 | 70238374 | 70238524 |
| chr11 | 70239105 | 70239299 |
| chr11 | 70239582 | 70239912 |
| chr11 | 70240056 | 70240212 |
| chr11 | 70242562 | 70242795 |
| chr11 | 70247503 | 70247790 |
| chr11 | 70250933 | 70251157 |
| chr11 | 70259007 | 70259424 |
| chr11 | 70259424 | 70259682 |
| chr11 | 70275909 | 70276189 |
| chr11 | 70283700 | 70283888 |
| chr11 | 70284704 | 70285147 |
| chr11 | 70291399 | 70291730 |
| chr11 | 70293337 | 70293487 |
| chr11 | 70307684 | 70307866 |
| chr11 | 70313930 | 70314156 |
| chr11 | 70321699 | 70321958 |
| chr11 | 70321990 | 70322140 |
| chr11 | 70324751 | 70325060 |
| chr11 | 70329549 | 70329713 |
| chr11 | 70334562 | 70334820 |

|       |          |          |
|-------|----------|----------|
| chr11 | 70345580 | 70345867 |
| chr11 | 70353185 | 70353345 |
| chr11 | 70393906 | 70394086 |
| chr11 | 70409543 | 70409994 |
| chr11 | 70409994 | 70410574 |
| chr11 | 70414047 | 70414277 |
| chr11 | 70431648 | 70431891 |
| chr11 | 70432066 | 70432414 |
| chr11 | 70432414 | 70432946 |
| chr11 | 70432955 | 70433184 |
| chr11 | 70440074 | 70440353 |
| chr11 | 70440677 | 70441069 |
| chr11 | 70441195 | 70441362 |
| chr11 | 70451715 | 70452041 |
| chr11 | 70452041 | 70452645 |
| chr11 | 70453223 | 70453387 |
| chr11 | 70458713 | 70459072 |
| chr11 | 70459183 | 70459515 |
| chr11 | 70459515 | 70459869 |
| chr11 | 70459869 | 70460321 |
| chr11 | 70467630 | 70468364 |
| chr11 | 70470164 | 70470391 |
| chr11 | 70499636 | 70499921 |
| chr11 | 70499957 | 70500222 |
| chr11 | 70500222 | 70500453 |
| chr11 | 70500453 | 70500745 |
| chr11 | 70506426 | 70506710 |
| chr11 | 70506710 | 70506922 |
| chr11 | 70510078 | 70510383 |
| chr11 | 70510439 | 70510593 |
| chr11 | 70511332 | 70511533 |
| chr11 | 70513652 | 70513907 |
| chr11 | 70516418 | 70516706 |
| chr11 | 70523386 | 70523592 |
| chr11 | 70525070 | 70525457 |
| chr11 | 70525457 | 70525682 |
| chr11 | 70525819 | 70526057 |
| chr11 | 70531265 | 70531520 |
| chr11 | 70539860 | 70540318 |
| chr11 | 70540318 | 70540682 |
| chr11 | 70540761 | 70540912 |
| chr11 | 70561988 | 70562274 |



|       |          |          |
|-------|----------|----------|
| chr11 | 70562274 | 70562654 |
| chr11 | 70562660 | 70563104 |
| chr11 | 70563104 | 70563410 |
| chr11 | 70563452 | 70563673 |
| chr11 | 70563673 | 70563909 |
| chr11 | 70564073 | 70564275 |
| chr11 | 70571133 | 70571396 |
| chr11 | 70572121 | 70572283 |
| chr11 | 70572435 | 70572930 |
| chr11 | 70574042 | 70574335 |
| chr11 | 70577239 | 70577709 |
| chr11 | 70577793 | 70578058 |
| chr11 | 70579722 | 70580042 |
| chr11 | 70580045 | 70580246 |
| chr11 | 70585312 | 70585801 |
| chr11 | 70586259 | 70586530 |
| chr11 | 70586530 | 70586771 |
| chr11 | 70586963 | 70587113 |
| chr11 | 70595793 | 70595943 |
| chr11 | 70601349 | 70601592 |
| chr11 | 70605104 | 70605510 |
| chr11 | 70608664 | 70608928 |
| chr11 | 70610843 | 70610994 |
| chr11 | 70612594 | 70612799 |
| chr11 | 70615078 | 70615309 |
| chr11 | 70615606 | 70615906 |
| chr11 | 70616403 | 70616614 |
| chr11 | 70617236 | 70617417 |
| chr11 | 70622070 | 70622216 |
| chr11 | 70622216 | 70622374 |
| chr11 | 70622440 | 70622839 |
| chr11 | 70623110 | 70623401 |
| chr11 | 70625537 | 70625769 |
| chr11 | 70629645 | 70629869 |
| chr11 | 70635727 | 70635892 |
| chr11 | 70640152 | 70640312 |
| chr11 | 70640597 | 70641000 |
| chr11 | 70641434 | 70641608 |
| chr11 | 70646684 | 70647106 |
| chr11 | 70647106 | 70647382 |
| chr11 | 70647382 | 70647646 |
| chr11 | 70647762 | 70648048 |

|       |          |          |
|-------|----------|----------|
| chr11 | 70651423 | 70651691 |
| chr11 | 70653563 | 70653958 |
| chr11 | 70653958 | 70654200 |
| chr11 | 70654440 | 70654711 |
| chr11 | 70654955 | 70655247 |
| chr11 | 70655279 | 70655548 |
| chr11 | 70655622 | 70655830 |
| chr11 | 70655830 | 70656010 |
| chr11 | 70656010 | 70656253 |
| chr11 | 70658700 | 70658863 |
| chr11 | 70668328 | 70668812 |
| chr11 | 70668812 | 70669133 |
| chr11 | 70669133 | 70669522 |
| chr11 | 70669978 | 70670159 |
| chr11 | 70681918 | 70682249 |
| chr11 | 70687165 | 70687631 |
| chr11 | 70687631 | 70688030 |
| chr11 | 70688030 | 70688291 |
| chr11 | 70699848 | 70700051 |
| chr11 | 70700051 | 70700319 |
| chr11 | 70700319 | 70700632 |
| chr11 | 70700632 | 70700936 |
| chr11 | 70700936 | 70701172 |
| chr11 | 70701172 | 70701370 |
| chr11 | 70701370 | 70701603 |
| chr11 | 70715847 | 70716150 |
| chr11 | 70716150 | 70716351 |
| chr11 | 70720119 | 70720292 |
| chr11 | 70720638 | 70721016 |
| chr11 | 70731072 | 70731309 |
| chr11 | 70732434 | 70732607 |
| chr11 | 70747382 | 70747878 |
| chr11 | 70747880 | 70748314 |
| chr11 | 70753377 | 70753537 |
| chr11 | 70755082 | 70755241 |
| chr11 | 70755686 | 70755961 |
| chr11 | 70755987 | 70756146 |
| chr11 | 70756479 | 70756726 |
| chr11 | 70764095 | 70764804 |
| chr11 | 70765969 | 70766192 |
| chr11 | 70766192 | 70766501 |
| chr11 | 70777217 | 70777541 |

|       |          |          |
|-------|----------|----------|
| chr11 | 70777726 | 70777920 |
| chr11 | 70777920 | 70778149 |
| chr11 | 70778149 | 70778363 |
| chr11 | 70778363 | 70778610 |
| chr11 | 70785232 | 70785458 |
| chr11 | 70790607 | 70790787 |
| chr11 | 70792501 | 70792744 |
| chr11 | 70796920 | 70797076 |
| chr11 | 70803491 | 70803765 |
| chr11 | 70808217 | 70808417 |
| chr11 | 70815033 | 70815219 |
| chr11 | 70815568 | 70815812 |
| chr11 | 70815812 | 70816060 |
| chr11 | 70816060 | 70816267 |
| chr11 | 70828943 | 70829263 |
| chr11 | 70829263 | 70829604 |
| chr11 | 70844512 | 70844853 |
| chr11 | 70844853 | 70845075 |
| chr11 | 70845075 | 70845261 |
| chr11 | 70845261 | 70845498 |
| chr11 | 70850233 | 70850401 |
| chr11 | 70857122 | 70857505 |
| chr11 | 70866545 | 70866919 |
| chr11 | 70867060 | 70867336 |
| chr11 | 70867895 | 70868185 |
| chr11 | 70870470 | 70870760 |
| chr11 | 70873986 | 70874348 |
| chr11 | 70874348 | 70874646 |
| chr11 | 70877746 | 70877985 |
| chr11 | 70878428 | 70878732 |
| chr11 | 70906737 | 70906968 |
| chr11 | 70917887 | 70918263 |
| chr11 | 70924296 | 70924552 |
| chr11 | 70935304 | 70935549 |
| chr11 | 70964313 | 70964577 |
| chr11 | 70969459 | 70969786 |
| chr11 | 70969844 | 70970318 |
| chr11 | 70970334 | 70970594 |
| chr11 | 70970597 | 70970956 |
| chr11 | 70974086 | 70974280 |
| chr11 | 70982602 | 70982885 |
| chr11 | 70982885 | 70983241 |

|       |          |          |
|-------|----------|----------|
| chr11 | 71003765 | 71004051 |
| chr11 | 71004051 | 71004334 |
| chr11 | 71004334 | 71004755 |
| chr11 | 71012820 | 71013000 |
| chr11 | 71018846 | 71019124 |
| chr11 | 71019127 | 71019611 |
| chr11 | 71019611 | 71020011 |
| chr11 | 71039996 | 71040259 |
| chr11 | 71052673 | 71052824 |
| chr11 | 71371965 | 71372118 |
| chr11 | 71434996 | 71435212 |
| chr11 | 71499459 | 71500003 |
| chr11 | 71666914 | 71667101 |
| chr11 | 71672719 | 71673017 |
| chr11 | 71674325 | 71674662 |
| chr11 | 71728029 | 71728450 |
| chr11 | 71728450 | 71728867 |
| chr11 | 71730703 | 71730860 |
| chr11 | 71733869 | 71734122 |
| chr11 | 71734480 | 71734751 |
| chr11 | 71737143 | 71737448 |
| chr11 | 71749754 | 71750035 |
| chr11 | 71750437 | 71750882 |
| chr11 | 71750882 | 71751225 |
| chr11 | 71751298 | 71751554 |
| chr11 | 71831292 | 71831620 |
| chr11 | 71848041 | 71848279 |
| chr11 | 71855661 | 71855883 |
| chr11 | 71871103 | 71871280 |
| chr11 | 71871398 | 71871578 |
| chr11 | 71873299 | 71873486 |
| chr11 | 71930151 | 71930961 |
| chr11 | 71931772 | 71931975 |
| chr11 | 71954628 | 71954804 |
| chr11 | 71962332 | 71962536 |
| chr11 | 71970577 | 71970867 |
| chr11 | 71976758 | 71977150 |
| chr11 | 71977150 | 71977555 |
| chr11 | 71986093 | 71986260 |
| chr11 | 71991567 | 71991822 |
| chr11 | 71995721 | 71995968 |
| chr11 | 71995968 | 71996252 |

|       |          |          |
|-------|----------|----------|
| chr11 | 71996252 | 71996542 |
| chr11 | 72007875 | 72008053 |
| chr11 | 72017758 | 72018186 |
| chr11 | 72018443 | 72018612 |
| chr11 | 72024460 | 72024786 |
| chr11 | 72025923 | 72026086 |
| chr11 | 72029156 | 72029466 |
| chr11 | 72038159 | 72038321 |
| chr11 | 72041798 | 72042165 |
| chr11 | 72042165 | 72042623 |
| chr11 | 72042623 | 72042991 |
| chr11 | 72051616 | 72051829 |
| chr11 | 72052682 | 72052962 |
| chr11 | 72052962 | 72053310 |
| chr11 | 72060898 | 72061048 |
| chr11 | 72066356 | 72066816 |
| chr11 | 72067047 | 72067217 |
| chr11 | 72078040 | 72078276 |
| chr11 | 72078335 | 72078664 |
| chr11 | 72083642 | 72084340 |
| chr11 | 72085448 | 72085716 |
| chr11 | 72094036 | 72094475 |
| chr11 | 72094475 | 72094873 |
| chr11 | 72094873 | 72095356 |
| chr11 | 72110502 | 72110817 |
| chr11 | 72110817 | 72111143 |
| chr11 | 72112484 | 72112764 |
| chr11 | 72120325 | 72120604 |
| chr11 | 72120604 | 72120817 |
| chr11 | 72123592 | 72123897 |
| chr11 | 72130022 | 72130440 |
| chr11 | 72130440 | 72130854 |
| chr11 | 72132170 | 72132421 |
| chr11 | 72132421 | 72132678 |
| chr11 | 72134345 | 72134898 |
| chr11 | 72134975 | 72135162 |
| chr11 | 72135162 | 72135361 |
| chr11 | 72135629 | 72135975 |
| chr11 | 72140280 | 72140531 |
| chr11 | 72142788 | 72143333 |
| chr11 | 72145272 | 72145501 |
| chr11 | 72145669 | 72145838 |

|       |          |          |
|-------|----------|----------|
| chr11 | 72152785 | 72153446 |
| chr11 | 72153446 | 72153880 |
| chr11 | 72170381 | 72170696 |
| chr11 | 72175348 | 72175498 |
| chr11 | 72186070 | 72186291 |
| chr11 | 72186403 | 72187043 |
| chr11 | 72194323 | 72194621 |
| chr11 | 72194646 | 72195020 |
| chr11 | 72196513 | 72196838 |
| chr11 | 72196838 | 72197163 |
| chr11 | 72206041 | 72206369 |
| chr11 | 72206369 | 72206907 |
| chr11 | 72206907 | 72207408 |
| chr11 | 72207408 | 72207881 |
| chr11 | 72214654 | 72214906 |
| chr11 | 72214906 | 72215139 |
| chr11 | 72215139 | 72215432 |
| chr11 | 72215432 | 72215755 |
| chr11 | 72221326 | 72221753 |
| chr11 | 72224921 | 72225219 |
| chr11 | 72263942 | 72264118 |
| chr11 | 72266107 | 72266557 |
| chr11 | 72266557 | 72266942 |
| chr11 | 72266942 | 72267302 |
| chr11 | 72273509 | 72273661 |
| chr11 | 72275867 | 72276053 |
| chr11 | 72276212 | 72276372 |
| chr11 | 72281363 | 72282158 |
| chr11 | 72299343 | 72299574 |
| chr11 | 72300096 | 72300287 |
| chr11 | 72301317 | 72301689 |
| chr11 | 72301689 | 72301947 |
| chr11 | 72314368 | 72314639 |
| chr11 | 72325781 | 72325952 |
| chr11 | 72342271 | 72342584 |
| chr11 | 72342584 | 72343034 |
| chr11 | 72354924 | 72355329 |
| chr11 | 72355329 | 72355632 |
| chr11 | 72361833 | 72361999 |
| chr11 | 72362048 | 72362198 |
| chr11 | 72396505 | 72396707 |
| chr11 | 72397858 | 72398054 |

|       |          |          |
|-------|----------|----------|
| chr11 | 72410686 | 72410845 |
| chr11 | 72410985 | 72411472 |
| chr11 | 72411472 | 72411968 |
| chr11 | 72412038 | 72412261 |
| chr11 | 72423604 | 72424260 |
| chr11 | 72428686 | 72428959 |
| chr11 | 72429277 | 72429704 |
| chr11 | 72429704 | 72429913 |
| chr11 | 72434741 | 72434916 |
| chr11 | 72434929 | 72435339 |
| chr11 | 72435339 | 72435716 |
| chr11 | 72440691 | 72440935 |
| chr11 | 72440966 | 72441450 |
| chr11 | 72441450 | 72441908 |
| chr11 | 72446351 | 72446701 |
| chr11 | 72447542 | 72447795 |
| chr11 | 72451346 | 72451662 |
| chr11 | 72451970 | 72452274 |
| chr11 | 72454071 | 72454240 |
| chr11 | 72455036 | 72455190 |
| chr11 | 72455920 | 72456090 |
| chr11 | 72459500 | 72459666 |
| chr11 | 72466354 | 72466632 |
| chr11 | 72467116 | 72467358 |
| chr11 | 72467358 | 72467653 |
| chr11 | 72468928 | 72469171 |
| chr11 | 72469320 | 72469600 |
| chr11 | 72472517 | 72472911 |
| chr11 | 72472914 | 72473269 |
| chr11 | 72473269 | 72473477 |
| chr11 | 72473524 | 72473882 |
| chr11 | 72474206 | 72474416 |
| chr11 | 72477018 | 72477184 |
| chr11 | 72478246 | 72478822 |
| chr11 | 72479604 | 72479800 |
| chr11 | 72484663 | 72485133 |
| chr11 | 72485187 | 72485717 |
| chr11 | 72488676 | 72489098 |
| chr11 | 72489841 | 72490258 |
| chr11 | 72490341 | 72490501 |
| chr11 | 72491062 | 72491531 |
| chr11 | 72494279 | 72494603 |

|       |          |          |
|-------|----------|----------|
| chr11 | 72494603 | 72494822 |
| chr11 | 72496046 | 72496267 |
| chr11 | 72499171 | 72499321 |
| chr11 | 72500253 | 72500502 |
| chr11 | 72501153 | 72501441 |
| chr11 | 72501441 | 72501868 |
| chr11 | 72501868 | 72502281 |
| chr11 | 72502424 | 72502604 |
| chr11 | 72506492 | 72506822 |
| chr11 | 72508732 | 72508950 |
| chr11 | 72510329 | 72510530 |
| chr11 | 72510717 | 72511075 |
| chr11 | 72511075 | 72511351 |
| chr11 | 72519250 | 72519593 |
| chr11 | 72519616 | 72519974 |
| chr11 | 72519974 | 72520569 |
| chr11 | 72526210 | 72526459 |
| chr11 | 72526506 | 72526992 |
| chr11 | 72529895 | 72530103 |
| chr11 | 72531073 | 72531429 |
| chr11 | 72531429 | 72531693 |
| chr11 | 72531737 | 72531961 |
| chr11 | 72536500 | 72537020 |
| chr11 | 72541814 | 72542095 |
| chr11 | 72542095 | 72542328 |
| chr11 | 72558232 | 72558398 |
| chr11 | 72558467 | 72558736 |
| chr11 | 72564297 | 72564646 |
| chr11 | 72569178 | 72569343 |
| chr11 | 72570538 | 72571088 |
| chr11 | 72573884 | 72574143 |
| chr11 | 72576148 | 72576419 |
| chr11 | 72576419 | 72576690 |
| chr11 | 72578206 | 72578370 |
| chr11 | 72578570 | 72578832 |
| chr11 | 72580597 | 72580821 |
| chr11 | 72581391 | 72581561 |
| chr11 | 72581633 | 72582004 |
| chr11 | 72594926 | 72595281 |
| chr11 | 72595319 | 72595623 |
| chr11 | 72596046 | 72596291 |
| chr11 | 72597173 | 72597533 |



|       |          |          |
|-------|----------|----------|
| chr11 | 72597896 | 72598118 |
| chr11 | 72602037 | 72602211 |
| chr11 | 72606872 | 72607521 |
| chr11 | 72607521 | 72608142 |
| chr11 | 72608142 | 72608681 |
| chr11 | 72689725 | 72690108 |
| chr11 | 72690108 | 72690712 |
| chr11 | 72696642 | 72697009 |
| chr11 | 72705137 | 72705706 |
| chr11 | 72726137 | 72726330 |
| chr11 | 72737572 | 72737863 |
| chr11 | 72752000 | 72752338 |
| chr11 | 72759681 | 72759885 |
| chr11 | 72764860 | 72765071 |
| chr11 | 72765317 | 72765583 |
| chr11 | 72765627 | 72766118 |
| chr11 | 72766205 | 72766384 |
| chr11 | 72766384 | 72766568 |
| chr11 | 72766766 | 72767161 |
| chr11 | 72767656 | 72768073 |
| chr11 | 72772520 | 72772737 |
| chr11 | 72772737 | 72772846 |
| chr11 | 72782186 | 72782399 |
| chr11 | 72792098 | 72792480 |
| chr11 | 72792734 | 72792951 |
| chr11 | 72792951 | 72793236 |
| chr11 | 72795260 | 72795500 |
| chr11 | 72795500 | 72795693 |
| chr11 | 72795693 | 72795904 |
| chr11 | 72795982 | 72796366 |
| chr11 | 72796366 | 72796673 |
| chr11 | 72799366 | 72799536 |
| chr11 | 72803554 | 72803722 |
| chr11 | 72803927 | 72804155 |
| chr11 | 72818876 | 72819040 |
| chr11 | 72821095 | 72821372 |
| chr11 | 72842811 | 72843068 |
| chr11 | 72843129 | 72843404 |
| chr11 | 72843657 | 72843896 |
| chr11 | 72846730 | 72847012 |
| chr11 | 72847898 | 72848221 |
| chr11 | 72848221 | 72848566 |

|       |          |          |
|-------|----------|----------|
| chr11 | 72848566 | 72848860 |
| chr11 | 72854132 | 72854337 |
| chr11 | 72897722 | 72897898 |
| chr11 | 72900934 | 72901333 |
| chr11 | 72917762 | 72917912 |
| chr11 | 72926558 | 72926842 |
| chr11 | 72928557 | 72928855 |
| chr11 | 72934333 | 72934533 |
| chr11 | 72940911 | 72941157 |
| chr11 | 72946224 | 72946694 |
| chr11 | 72948309 | 72948534 |
| chr11 | 72951201 | 72951426 |
| chr11 | 72951623 | 72952070 |
| chr11 | 72952166 | 72952345 |
| chr11 | 72952687 | 72952933 |
| chr11 | 72953462 | 72953713 |
| chr11 | 72953721 | 72954078 |
| chr11 | 72960422 | 72960580 |
| chr11 | 72960973 | 72961567 |
| chr11 | 72980175 | 72980387 |
| chr11 | 72983249 | 72983624 |
| chr11 | 72988605 | 72988756 |
| chr11 | 72989271 | 72989457 |
| chr11 | 73001099 | 73001370 |
| chr11 | 73006015 | 73006165 |
| chr11 | 73006415 | 73006688 |
| chr11 | 73006688 | 73006899 |
| chr11 | 73007770 | 73008013 |
| chr11 | 73012591 | 73012749 |
| chr11 | 73018430 | 73018750 |
| chr11 | 73018750 | 73019187 |
| chr11 | 73019314 | 73019467 |
| chr11 | 73019517 | 73019781 |
| chr11 | 73021550 | 73021803 |
| chr11 | 73022154 | 73022460 |
| chr11 | 73023107 | 73023451 |
| chr11 | 73030783 | 73031180 |
| chr11 | 73036855 | 73037384 |
| chr11 | 73039481 | 73039708 |
| chr11 | 73047559 | 73047922 |
| chr11 | 73047922 | 73048297 |
| chr11 | 73048297 | 73048571 |

|       |          |          |
|-------|----------|----------|
| chr11 | 73048636 | 73048786 |
| chr11 | 73049397 | 73049646 |
| chr11 | 73065768 | 73066005 |
| chr11 | 73066066 | 73066514 |
| chr11 | 73071913 | 73072113 |
| chr11 | 73083931 | 73084284 |
| chr11 | 73084284 | 73084769 |
| chr11 | 73092105 | 73092399 |
| chr11 | 73092603 | 73092860 |
| chr11 | 73092865 | 73093329 |
| chr11 | 73095478 | 73095911 |
| chr11 | 73099001 | 73099221 |
| chr11 | 73107435 | 73107694 |
| chr11 | 73108698 | 73108851 |
| chr11 | 73111398 | 73111809 |
| chr11 | 73117153 | 73117313 |
| chr11 | 73131027 | 73131428 |
| chr11 | 73137557 | 73137873 |
| chr11 | 73137873 | 73138190 |
| chr11 | 73138190 | 73138590 |
| chr11 | 73160281 | 73160693 |
| chr11 | 73160822 | 73161295 |
| chr11 | 73161379 | 73161664 |
| chr11 | 73161664 | 73161944 |
| chr11 | 73167127 | 73167345 |
| chr11 | 73169137 | 73169682 |
| chr11 | 73175721 | 73175966 |
| chr11 | 73176534 | 73176702 |
| chr11 | 73176718 | 73177301 |
| chr11 | 73177301 | 73177564 |
| chr11 | 73177564 | 73177890 |
| chr11 | 73183799 | 73183976 |
| chr11 | 73192958 | 73193353 |
| chr11 | 73198664 | 73198925 |
| chr11 | 73198925 | 73199261 |
| chr11 | 73199261 | 73199795 |
| chr11 | 73199956 | 73200151 |
| chr11 | 73205227 | 73205523 |
| chr11 | 73205791 | 73206056 |
| chr11 | 73207734 | 73207959 |
| chr11 | 73220640 | 73220999 |
| chr11 | 73222893 | 73223142 |

|       |          |          |
|-------|----------|----------|
| chr11 | 73224020 | 73224347 |
| chr11 | 73228726 | 73229061 |
| chr11 | 73245854 | 73246017 |
| chr11 | 73266282 | 73266436 |
| chr11 | 73266517 | 73266755 |
| chr11 | 73266942 | 73267162 |
| chr11 | 73267284 | 73267726 |
| chr11 | 73274981 | 73275164 |
| chr11 | 73281518 | 73281753 |
| chr11 | 73281765 | 73282094 |
| chr11 | 73283606 | 73283972 |
| chr11 | 73283972 | 73284670 |
| chr11 | 73318461 | 73318923 |
| chr11 | 73319676 | 73319857 |
| chr11 | 73326390 | 73326932 |
| chr11 | 73354105 | 73354302 |
| chr11 | 73388529 | 73388679 |
| chr11 | 73498606 | 73498791 |
| chr11 | 74371525 | 74371735 |
| chr11 | 74371735 | 74372055 |
| chr11 | 74374893 | 74375043 |
| chr11 | 74376876 | 74377263 |
| chr11 | 74379168 | 74379391 |
| chr11 | 74382396 | 74382620 |
| chr11 | 74385446 | 74385666 |
| chr11 | 74387299 | 74387449 |
| chr11 | 74402204 | 74402485 |
| chr11 | 74408760 | 74409232 |
| chr11 | 74409737 | 74410124 |
| chr11 | 74419673 | 74420041 |
| chr11 | 74438444 | 74438611 |
| chr11 | 74438807 | 74438976 |
| chr11 | 74439147 | 74439674 |
| chr11 | 74442397 | 74442771 |
| chr11 | 74443923 | 74444102 |
| chr11 | 74447980 | 74448538 |
| chr11 | 74452219 | 74452602 |
| chr11 | 74464033 | 74464233 |
| chr11 | 74465700 | 74466137 |
| chr11 | 74475783 | 74476062 |
| chr11 | 74483037 | 74483437 |
| chr11 | 74483437 | 74483830 |

|       |          |          |
|-------|----------|----------|
| chr11 | 74483830 | 74484237 |
| chr11 | 74502157 | 74502428 |
| chr11 | 74502474 | 74503064 |
| chr11 | 74522043 | 74522249 |
| chr11 | 74522415 | 74522881 |
| chr11 | 74522881 | 74523286 |
| chr11 | 74526275 | 74526504 |
| chr11 | 74526504 | 74526787 |
| chr11 | 74529895 | 74530122 |
| chr11 | 74536294 | 74536449 |
| chr11 | 74541234 | 74541405 |
| chr11 | 74546242 | 74546480 |
| chr11 | 74547233 | 74547451 |
| chr11 | 74547451 | 74547725 |
| chr11 | 74548279 | 74548449 |
| chr11 | 74548449 | 74548540 |
| chr11 | 74548738 | 74549141 |
| chr11 | 74550786 | 74550995 |
| chr11 | 74554624 | 74554987 |
| chr11 | 74555691 | 74556371 |
| chr11 | 74557512 | 74557763 |
| chr11 | 74566340 | 74566745 |
| chr11 | 74572120 | 74572384 |
| chr11 | 74572659 | 74573054 |
| chr11 | 74583879 | 74584082 |
| chr11 | 74584139 | 74584342 |
| chr11 | 74584980 | 74585244 |
| chr11 | 74586013 | 74586163 |
| chr11 | 74590014 | 74590199 |
| chr11 | 74595663 | 74595912 |
| chr11 | 74597410 | 74597560 |
| chr11 | 74610831 | 74611144 |
| chr11 | 74619158 | 74619536 |
| chr11 | 74634564 | 74634725 |
| chr11 | 74637910 | 74638369 |
| chr11 | 74638369 | 74638923 |
| chr11 | 74649097 | 74649622 |
| chr11 | 74649622 | 74649925 |
| chr11 | 74649925 | 74650227 |
| chr11 | 74650379 | 74650617 |
| chr11 | 74656021 | 74656256 |
| chr11 | 74660413 | 74660623 |

|       |          |          |
|-------|----------|----------|
| chr11 | 74670336 | 74670580 |
| chr11 | 74671135 | 74671306 |
| chr11 | 74673277 | 74673427 |
| chr11 | 74673643 | 74673872 |
| chr11 | 74678724 | 74678920 |
| chr11 | 74710774 | 74710963 |
| chr11 | 74713259 | 74713437 |
| chr11 | 74723395 | 74723750 |
| chr11 | 74723750 | 74723987 |
| chr11 | 74723987 | 74724240 |
| chr11 | 74724240 | 74724551 |
| chr11 | 74724551 | 74724819 |
| chr11 | 74727495 | 74727812 |
| chr11 | 74747999 | 74748363 |
| chr11 | 74764175 | 74764706 |
| chr11 | 74770453 | 74771002 |
| chr11 | 74771002 | 74771278 |
| chr11 | 74771342 | 74771537 |
| chr11 | 74821587 | 74821737 |
| chr11 | 74826210 | 74826456 |
| chr11 | 74829855 | 74830144 |
| chr11 | 74830144 | 74830548 |
| chr11 | 74830548 | 74830850 |
| chr11 | 74830850 | 74831027 |
| chr11 | 74831262 | 74831412 |
| chr11 | 74831675 | 74832287 |
| chr11 | 74832287 | 74832577 |
| chr11 | 74832830 | 74833093 |
| chr11 | 74837494 | 74837680 |
| chr11 | 74837680 | 74838056 |
| chr11 | 74838056 | 74838443 |
| chr11 | 74838443 | 74838821 |
| chr11 | 74839024 | 74839252 |
| chr11 | 74840051 | 74840238 |
| chr11 | 74847905 | 74848216 |
| chr11 | 74848216 | 74848668 |
| chr11 | 74848747 | 74848979 |
| chr11 | 74859637 | 74859911 |
| chr11 | 74860270 | 74860558 |
| chr11 | 74862053 | 74862574 |
| chr11 | 74863654 | 74863825 |
| chr11 | 74864050 | 74864292 |

|       |          |          |
|-------|----------|----------|
| chr11 | 74870807 | 74871343 |
| chr11 | 74871343 | 74871683 |
| chr11 | 74876821 | 74877302 |
| chr11 | 74881029 | 74881295 |
| chr11 | 74896019 | 74896192 |
| chr11 | 74896263 | 74896514 |
| chr11 | 74896514 | 74896856 |
| chr11 | 74896856 | 74897163 |
| chr11 | 74897163 | 74897643 |
| chr11 | 74897688 | 74897909 |
| chr11 | 74897909 | 74898206 |
| chr11 | 74910784 | 74911099 |
| chr11 | 74911099 | 74911318 |
| chr11 | 74911947 | 74912099 |
| chr11 | 74912226 | 74912381 |
| chr11 | 74912458 | 74912858 |
| chr11 | 74914760 | 74914910 |
| chr11 | 74925416 | 74925866 |
| chr11 | 74925866 | 74926289 |
| chr11 | 74926289 | 74926596 |
| chr11 | 74926706 | 74926877 |
| chr11 | 74946405 | 74946641 |
| chr11 | 74953297 | 74953452 |
| chr11 | 74954833 | 74955303 |
| chr11 | 74955359 | 74955509 |
| chr11 | 74965590 | 74965825 |
| chr11 | 74973290 | 74973701 |
| chr11 | 74981471 | 74981822 |
| chr11 | 74990741 | 74991201 |
| chr11 | 75008453 | 75008645 |
| chr11 | 75027094 | 75027301 |
| chr11 | 75027667 | 75027904 |
| chr11 | 75045503 | 75045772 |
| chr11 | 75045856 | 75046188 |
| chr11 | 75052970 | 75053242 |
| chr11 | 75053242 | 75053516 |
| chr11 | 75053744 | 75053947 |
| chr11 | 75054170 | 75054533 |
| chr11 | 75056784 | 75057078 |
| chr11 | 75059645 | 75059988 |
| chr11 | 75072344 | 75072720 |
| chr11 | 75097819 | 75098064 |

|       |          |          |
|-------|----------|----------|
| chr11 | 75102812 | 75102962 |
| chr11 | 75128825 | 75129026 |
| chr11 | 75137514 | 75137887 |
| chr11 | 75140488 | 75140705 |
| chr11 | 75142831 | 75143093 |
| chr11 | 75147913 | 75148077 |
| chr11 | 75153236 | 75153549 |
| chr11 | 75155993 | 75156187 |
| chr11 | 75159674 | 75159935 |
| chr11 | 75165397 | 75165647 |
| chr11 | 75166951 | 75167221 |
| chr11 | 75168598 | 75168837 |
| chr11 | 75169096 | 75169362 |
| chr11 | 75170154 | 75170443 |
| chr11 | 75170443 | 75170778 |
| chr11 | 75172899 | 75173451 |
| chr11 | 75173451 | 75173935 |
| chr11 | 75178525 | 75178979 |
| chr11 | 75178979 | 75179286 |
| chr11 | 75184104 | 75184383 |
| chr11 | 75184383 | 75184542 |
| chr11 | 75189815 | 75190087 |
| chr11 | 75190087 | 75190398 |
| chr11 | 75190398 | 75190831 |
| chr11 | 75192860 | 75193111 |
| chr11 | 75193552 | 75193715 |
| chr11 | 75194964 | 75195180 |
| chr11 | 75195180 | 75195398 |
| chr11 | 75201063 | 75201257 |
| chr11 | 75213512 | 75213709 |
| chr11 | 75213709 | 75213923 |
| chr11 | 75213923 | 75214293 |
| chr11 | 75220195 | 75220431 |
| chr11 | 75220585 | 75220831 |
| chr11 | 75220856 | 75221023 |
| chr11 | 75221173 | 75221491 |
| chr11 | 75225370 | 75225613 |
| chr11 | 75231848 | 75232100 |
| chr11 | 75234810 | 75235142 |
| chr11 | 75241043 | 75241260 |
| chr11 | 75245720 | 75245997 |
| chr11 | 75246694 | 75246858 |



|       |          |          |
|-------|----------|----------|
| chr11 | 75246880 | 75247034 |
| chr11 | 75254408 | 75254585 |
| chr11 | 75254592 | 75255005 |
| chr11 | 75262986 | 75263136 |
| chr11 | 75264630 | 75264910 |
| chr11 | 75267855 | 75268055 |
| chr11 | 75279196 | 75279551 |
| chr11 | 75280560 | 75280710 |
| chr11 | 75290946 | 75291250 |
| chr11 | 75294163 | 75294320 |
| chr11 | 75334935 | 75335235 |
| chr11 | 75348089 | 75348566 |
| chr11 | 75348566 | 75348916 |
| chr11 | 75356946 | 75357132 |
| chr11 | 75377209 | 75377359 |
| chr11 | 75381951 | 75382131 |
| chr11 | 75383415 | 75383886 |
| chr11 | 75387527 | 75387768 |
| chr11 | 75389213 | 75389437 |
| chr11 | 75395570 | 75395884 |
| chr11 | 75399311 | 75399774 |
| chr11 | 75402254 | 75402540 |
| chr11 | 75402545 | 75402716 |
| chr11 | 75403501 | 75403652 |
| chr11 | 75403656 | 75404092 |
| chr11 | 75406070 | 75406483 |
| chr11 | 75416360 | 75416587 |
| chr11 | 75426617 | 75426788 |
| chr11 | 75437111 | 75437358 |
| chr11 | 75438356 | 75438508 |
| chr11 | 75439802 | 75440052 |
| chr11 | 75445374 | 75445524 |
| chr11 | 75454133 | 75454360 |
| chr11 | 75454360 | 75454595 |
| chr11 | 75454595 | 75455035 |
| chr11 | 75458752 | 75458923 |
| chr11 | 75460495 | 75460757 |
| chr11 | 75461047 | 75461495 |
| chr11 | 75461495 | 75461805 |
| chr11 | 75462290 | 75462802 |
| chr11 | 75462910 | 75463126 |
| chr11 | 75463126 | 75463397 |

|       |          |          |
|-------|----------|----------|
| chr11 | 75470698 | 75471069 |
| chr11 | 75472819 | 75473270 |
| chr11 | 75486360 | 75486510 |
| chr11 | 75486512 | 75486888 |
| chr11 | 75486888 | 75487124 |
| chr11 | 75487124 | 75487308 |
| chr11 | 75494072 | 75494258 |
| chr11 | 75495213 | 75495608 |
| chr11 | 75508829 | 75509340 |
| chr11 | 75509753 | 75510143 |
| chr11 | 75510143 | 75510606 |
| chr11 | 75510606 | 75510995 |
| chr11 | 75519901 | 75520194 |
| chr11 | 75520271 | 75520483 |
| chr11 | 75530408 | 75530677 |
| chr11 | 75530677 | 75530880 |
| chr11 | 75530880 | 75531064 |
| chr11 | 75531094 | 75531282 |
| chr11 | 75531282 | 75531501 |
| chr11 | 75531501 | 75531837 |
| chr11 | 75531837 | 75532266 |
| chr11 | 75537814 | 75538099 |
| chr11 | 75538099 | 75538267 |
| chr11 | 75541146 | 75541554 |
| chr11 | 75551884 | 75552202 |
| chr11 | 75552202 | 75552518 |
| chr11 | 75562690 | 75563234 |
| chr11 | 75563734 | 75564259 |
| chr11 | 75564259 | 75564670 |
| chr11 | 75570647 | 75571132 |
| chr11 | 75571265 | 75571756 |
| chr11 | 75573209 | 75573707 |
| chr11 | 75576532 | 75576734 |
| chr11 | 75587875 | 75588211 |
| chr11 | 75588211 | 75588557 |
| chr11 | 75588557 | 75588977 |
| chr11 | 75592694 | 75592982 |
| chr11 | 75599897 | 75600094 |
| chr11 | 75604917 | 75605069 |
| chr11 | 75605388 | 75605798 |
| chr11 | 75606264 | 75606593 |
| chr11 | 75606593 | 75606929 |

|       |          |          |
|-------|----------|----------|
| chr11 | 75606992 | 75607247 |
| chr11 | 75619999 | 75620279 |
| chr11 | 75620299 | 75620831 |
| chr11 | 75620944 | 75621202 |
| chr11 | 75621235 | 75621732 |
| chr11 | 75630575 | 75631428 |
| chr11 | 75631694 | 75631883 |
| chr11 | 75638484 | 75638734 |
| chr11 | 75640232 | 75640415 |
| chr11 | 75651393 | 75651703 |
| chr11 | 75651807 | 75652061 |
| chr11 | 75652245 | 75652510 |
| chr11 | 75653288 | 75653659 |
| chr11 | 75653839 | 75654416 |
| chr11 | 75654501 | 75654719 |
| chr11 | 75655756 | 75655993 |
| chr11 | 75655993 | 75656239 |
| chr11 | 75671928 | 75672078 |
| chr11 | 75677866 | 75678206 |
| chr11 | 75678585 | 75678946 |
| chr11 | 75678986 | 75679377 |
| chr11 | 75679377 | 75679678 |
| chr11 | 75679678 | 75679966 |
| chr11 | 75679966 | 75680217 |
| chr11 | 75687466 | 75688129 |
| chr11 | 75688180 | 75688440 |
| chr11 | 75703804 | 75704113 |
| chr11 | 75732549 | 75732951 |
| chr11 | 75732951 | 75733248 |
| chr11 | 75733248 | 75733455 |
| chr11 | 75733455 | 75733748 |
| chr11 | 75736891 | 75737403 |
| chr11 | 75742118 | 75742388 |
| chr11 | 75746024 | 75746192 |
| chr11 | 75747586 | 75747745 |
| chr11 | 75753822 | 75753972 |
| chr11 | 75757610 | 75757829 |
| chr11 | 75762782 | 75762968 |
| chr11 | 75768069 | 75768243 |
| chr11 | 75768265 | 75768417 |
| chr11 | 75768478 | 75768630 |
| chr11 | 75768636 | 75768856 |

|       |          |          |
|-------|----------|----------|
| chr11 | 75769189 | 75769616 |
| chr11 | 75776004 | 75776279 |
| chr11 | 75781850 | 75782388 |
| chr11 | 75789228 | 75789431 |
| chr11 | 75795151 | 75795364 |
| chr11 | 75795944 | 75796411 |
| chr11 | 75796593 | 75796758 |
| chr11 | 75796758 | 75796844 |
| chr11 | 75806295 | 75806471 |
| chr11 | 75811741 | 75811904 |
| chr11 | 75811911 | 75812264 |
| chr11 | 75812981 | 75813554 |
| chr11 | 75821759 | 75822078 |
| chr11 | 75822078 | 75822538 |
| chr11 | 75846796 | 75846983 |
| chr11 | 75851663 | 75851864 |
| chr11 | 75851998 | 75852303 |
| chr11 | 75852675 | 75852830 |
| chr11 | 75853153 | 75853333 |
| chr11 | 75857754 | 75858115 |
| chr11 | 75858129 | 75858318 |
| chr11 | 75858370 | 75858773 |
| chr11 | 75861171 | 75861595 |
| chr11 | 75867003 | 75867308 |
| chr11 | 75869034 | 75869321 |
| chr11 | 75878562 | 75878777 |
| chr11 | 75880066 | 75880266 |
| chr11 | 75882624 | 75883117 |
| chr11 | 75896205 | 75896355 |
| chr11 | 75896611 | 75896871 |
| chr11 | 75903554 | 75903812 |
| chr11 | 75913326 | 75913593 |
| chr11 | 75914027 | 75914308 |
| chr11 | 75926947 | 75927109 |
| chr11 | 75929497 | 75929656 |
| chr11 | 75935752 | 75936308 |
| chr11 | 75937371 | 75937936 |
| chr11 | 75960872 | 75961026 |
| chr11 | 75963817 | 75963997 |
| chr11 | 75966366 | 75966813 |
| chr11 | 75966813 | 75967068 |
| chr11 | 75967068 | 75967423 |

|       |          |          |
|-------|----------|----------|
| chr11 | 75973186 | 75973383 |
| chr11 | 75980740 | 75980895 |
| chr11 | 75983320 | 75983538 |
| chr11 | 75999026 | 75999188 |
| chr11 | 75999553 | 75999761 |
| chr11 | 75999766 | 76000258 |
| chr11 | 76000309 | 76000459 |
| chr11 | 76008185 | 76008539 |
| chr11 | 76009169 | 76009329 |
| chr11 | 76011308 | 76011733 |
| chr11 | 76017431 | 76018049 |
| chr11 | 76019405 | 76019600 |
| chr11 | 76020456 | 76020748 |
| chr11 | 76026881 | 76027115 |
| chr11 | 76027115 | 76027355 |
| chr11 | 76027355 | 76027654 |
| chr11 | 76027654 | 76028092 |
| chr11 | 76039358 | 76039617 |
| chr11 | 76039617 | 76039835 |
| chr11 | 76049659 | 76049985 |
| chr11 | 76056550 | 76056790 |
| chr11 | 76059890 | 76060155 |
| chr11 | 76060155 | 76060374 |
| chr11 | 76066996 | 76067235 |
| chr11 | 76074132 | 76074294 |
| chr11 | 76074353 | 76074634 |
| chr11 | 76080297 | 76080754 |
| chr11 | 76086041 | 76086201 |
| chr11 | 76099768 | 76100067 |
| chr11 | 76100178 | 76100368 |
| chr11 | 76100438 | 76100625 |
| chr11 | 76121075 | 76121620 |
| chr11 | 76130210 | 76130459 |
| chr11 | 76130700 | 76131192 |
| chr11 | 76135454 | 76135604 |
| chr11 | 76135679 | 76135994 |
| chr11 | 76135994 | 76136327 |
| chr11 | 76137255 | 76137427 |
| chr11 | 76137952 | 76138315 |
| chr11 | 76154855 | 76155153 |
| chr11 | 76158162 | 76158765 |
| chr11 | 76160316 | 76160615 |

|       |          |          |
|-------|----------|----------|
| chr11 | 76160615 | 76160848 |
| chr11 | 76167472 | 76167632 |
| chr11 | 76178661 | 76179083 |
| chr11 | 76179107 | 76179514 |
| chr11 | 76179514 | 76179765 |
| chr11 | 76179765 | 76180165 |
| chr11 | 76187001 | 76187217 |
| chr11 | 76201724 | 76202259 |
| chr11 | 76202259 | 76202752 |
| chr11 | 76216736 | 76217059 |
| chr11 | 76217098 | 76217993 |
| chr11 | 76236094 | 76236422 |
| chr11 | 76236422 | 76236706 |
| chr11 | 76242622 | 76242863 |
| chr11 | 76242985 | 76243145 |
| chr11 | 76243218 | 76243607 |
| chr11 | 76243607 | 76243857 |
| chr11 | 76243857 | 76244092 |
| chr11 | 76247330 | 76247511 |
| chr11 | 76253212 | 76253459 |
| chr11 | 76253459 | 76253681 |
| chr11 | 76261111 | 76261718 |
| chr11 | 76261792 | 76262172 |
| chr11 | 76262417 | 76262671 |
| chr11 | 76269181 | 76269423 |
| chr11 | 76283886 | 76284116 |
| chr11 | 76285412 | 76285803 |
| chr11 | 76285827 | 76286036 |
| chr11 | 76286036 | 76286258 |
| chr11 | 76286539 | 76286858 |
| chr11 | 76286874 | 76287310 |
| chr11 | 76296495 | 76296972 |
| chr11 | 76314831 | 76315123 |
| chr11 | 76326714 | 76326962 |
| chr11 | 76328925 | 76329227 |
| chr11 | 76330290 | 76330465 |
| chr11 | 76337302 | 76337582 |
| chr11 | 76337799 | 76338034 |
| chr11 | 76351498 | 76351969 |
| chr11 | 76374877 | 76375041 |
| chr11 | 76387190 | 76387343 |
| chr11 | 76398378 | 76398802 |

|       |          |          |
|-------|----------|----------|
| chr11 | 76398802 | 76399071 |
| chr11 | 76399071 | 76399333 |
| chr11 | 76399333 | 76399561 |
| chr11 | 76399561 | 76399826 |
| chr11 | 76400063 | 76400271 |
| chr11 | 76406619 | 76407025 |
| chr11 | 76407025 | 76407292 |
| chr11 | 76407292 | 76407514 |
| chr11 | 76415117 | 76415358 |
| chr11 | 76421385 | 76421598 |
| chr11 | 76422050 | 76422596 |
| chr11 | 76425741 | 76426278 |
| chr11 | 76436817 | 76437072 |
| chr11 | 76437233 | 76437427 |
| chr11 | 76445615 | 76445792 |
| chr11 | 76446342 | 76446551 |
| chr11 | 76454567 | 76454838 |
| chr11 | 76456227 | 76456729 |
| chr11 | 76462568 | 76462772 |
| chr11 | 76462772 | 76462985 |
| chr11 | 76464468 | 76464697 |
| chr11 | 76469137 | 76469336 |
| chr11 | 76469411 | 76469903 |
| chr11 | 76469903 | 76470299 |
| chr11 | 76476845 | 76477263 |
| chr11 | 76477263 | 76477606 |
| chr11 | 76479714 | 76480417 |
| chr11 | 76493157 | 76493518 |
| chr11 | 76493805 | 76494242 |
| chr11 | 76494386 | 76494726 |
| chr11 | 76494726 | 76495066 |
| chr11 | 76495066 | 76495353 |
| chr11 | 76495353 | 76495606 |
| chr11 | 76495606 | 76495747 |
| chr11 | 76496160 | 76496402 |
| chr11 | 76497766 | 76498081 |
| chr11 | 76506722 | 76506920 |
| chr11 | 76506920 | 76507158 |
| chr11 | 76510339 | 76510632 |
| chr11 | 76511101 | 76511265 |
| chr11 | 76524989 | 76525285 |
| chr11 | 76529707 | 76530060 |

|       |          |          |
|-------|----------|----------|
| chr11 | 76530969 | 76531377 |
| chr11 | 76531428 | 76531645 |
| chr11 | 76537057 | 76537300 |
| chr11 | 76537316 | 76537480 |
| chr11 | 76541007 | 76541441 |
| chr11 | 76543359 | 76543630 |
| chr11 | 76562177 | 76562328 |
| chr11 | 76570857 | 76571103 |
| chr11 | 76571191 | 76571505 |
| chr11 | 76571505 | 76571825 |
| chr11 | 76572934 | 76573133 |
| chr11 | 76577158 | 76577346 |
| chr11 | 76577762 | 76577912 |
| chr11 | 76577921 | 76578203 |
| chr11 | 76587340 | 76587734 |
| chr11 | 76588160 | 76588489 |
| chr11 | 76589001 | 76589480 |
| chr11 | 76589480 | 76589692 |
| chr11 | 76589801 | 76590241 |
| chr11 | 76598318 | 76598748 |
| chr11 | 76598748 | 76599037 |
| chr11 | 76599165 | 76599590 |
| chr11 | 76600932 | 76601098 |
| chr11 | 76604379 | 76604702 |
| chr11 | 76605223 | 76605819 |
| chr11 | 76607102 | 76607283 |
| chr11 | 76615250 | 76615546 |
| chr11 | 76615546 | 76615826 |
| chr11 | 76615910 | 76616060 |
| chr11 | 76622083 | 76622451 |
| chr11 | 76622451 | 76622693 |
| chr11 | 76622693 | 76622867 |
| chr11 | 76622867 | 76623106 |
| chr11 | 76623106 | 76623410 |
| chr11 | 76623416 | 76623849 |
| chr11 | 76630105 | 76630284 |
| chr11 | 76637742 | 76637966 |
| chr11 | 76642230 | 76642628 |
| chr11 | 76646018 | 76646327 |
| chr11 | 76647316 | 76647573 |
| chr11 | 76647573 | 76647907 |
| chr11 | 76652530 | 76652902 |



|       |          |          |
|-------|----------|----------|
| chr11 | 76652902 | 76653160 |
| chr11 | 76655127 | 76655348 |
| chr11 | 76659381 | 76659535 |
| chr11 | 76659563 | 76659923 |
| chr11 | 76662317 | 76662675 |
| chr11 | 76663015 | 76663184 |
| chr11 | 76664824 | 76664976 |
| chr11 | 76669052 | 76669280 |
| chr11 | 76670560 | 76670866 |
| chr11 | 76671329 | 76671549 |
| chr11 | 76671904 | 76672059 |
| chr11 | 76672852 | 76673091 |
| chr11 | 76677050 | 76677443 |
| chr11 | 76681296 | 76681668 |
| chr11 | 76692038 | 76692259 |
| chr11 | 76695960 | 76696119 |
| chr11 | 76699735 | 76699982 |
| chr11 | 76709785 | 76709992 |
| chr11 | 76710110 | 76710349 |
| chr11 | 76716738 | 76716922 |
| chr11 | 76717651 | 76717807 |
| chr11 | 76734646 | 76734844 |
| chr11 | 76739210 | 76739431 |
| chr11 | 76739538 | 76739721 |
| chr11 | 76763038 | 76763460 |
| chr11 | 76763460 | 76763825 |
| chr11 | 76789354 | 76789574 |
| chr11 | 76823718 | 76824038 |
| chr11 | 76838185 | 76838342 |
| chr11 | 76845547 | 76845957 |
| chr11 | 76846020 | 76846528 |
| chr11 | 76846528 | 76846906 |
| chr11 | 76846906 | 76847262 |
| chr11 | 76855156 | 76855362 |
| chr11 | 76857180 | 76857367 |
| chr11 | 76857367 | 76857542 |
| chr11 | 76894308 | 76894610 |
| chr11 | 76900433 | 76900671 |
| chr11 | 76911279 | 76911739 |
| chr11 | 76912881 | 76913033 |
| chr11 | 76914425 | 76914719 |
| chr11 | 76916549 | 76916905 |

|       |          |          |
|-------|----------|----------|
| chr11 | 76917007 | 76917200 |
| chr11 | 76917200 | 76917404 |
| chr11 | 76924830 | 76925185 |
| chr11 | 76925561 | 76925787 |
| chr11 | 76925915 | 76926207 |
| chr11 | 76942775 | 76942940 |
| chr11 | 76945335 | 76945858 |
| chr11 | 76945858 | 76946240 |
| chr11 | 76946302 | 76946468 |
| chr11 | 76953588 | 76953748 |
| chr11 | 76982023 | 76982772 |
| chr11 | 76990896 | 76991225 |
| chr11 | 76992920 | 76993187 |
| chr11 | 76997314 | 76997812 |
| chr11 | 76997890 | 76998115 |
| chr11 | 76998115 | 76998423 |
| chr11 | 76998475 | 76998666 |
| chr11 | 77005651 | 77005849 |
| chr11 | 77005961 | 77006218 |
| chr11 | 77006228 | 77006627 |
| chr11 | 77011673 | 77012055 |
| chr11 | 77012055 | 77012435 |
| chr11 | 77018100 | 77018338 |
| chr11 | 77026681 | 77026869 |
| chr11 | 77041300 | 77041465 |
| chr11 | 77077864 | 77078114 |
| chr11 | 77078145 | 77078819 |
| chr11 | 77093372 | 77093562 |
| chr11 | 77100145 | 77100466 |
| chr11 | 77100466 | 77100652 |
| chr11 | 77101008 | 77101586 |
| chr11 | 77117021 | 77117178 |
| chr11 | 77132736 | 77133049 |
| chr11 | 77145477 | 77145767 |
| chr11 | 77160353 | 77161054 |
| chr11 | 77180886 | 77181247 |
| chr11 | 77184966 | 77185314 |
| chr11 | 77196821 | 77197117 |
| chr11 | 77200678 | 77201171 |
| chr11 | 77201442 | 77201777 |
| chr11 | 77214782 | 77215162 |
| chr11 | 77215494 | 77215858 |

|       |          |          |
|-------|----------|----------|
| chr11 | 77215930 | 77216346 |
| chr11 | 77216346 | 77216701 |
| chr11 | 77216701 | 77216899 |
| chr11 | 77216899 | 77217114 |
| chr11 | 77225320 | 77225533 |
| chr11 | 77225533 | 77225711 |
| chr11 | 77229803 | 77229965 |
| chr11 | 77230865 | 77231074 |
| chr11 | 77234821 | 77235123 |
| chr11 | 77241733 | 77241937 |
| chr11 | 77256044 | 77256324 |
| chr11 | 77261190 | 77261436 |
| chr11 | 77277311 | 77277473 |
| chr11 | 77277967 | 77278232 |
| chr11 | 77278561 | 77278911 |
| chr11 | 77278911 | 77279338 |
| chr11 | 77299272 | 77299422 |
| chr11 | 77308289 | 77308614 |
| chr11 | 77308620 | 77308866 |
| chr11 | 77311406 | 77311556 |
| chr11 | 77317763 | 77317927 |
| chr11 | 77347904 | 77348451 |
| chr11 | 77348451 | 77348895 |
| chr11 | 77355908 | 77356083 |
| chr11 | 77381395 | 77381565 |
| chr11 | 77382782 | 77382932 |
| chr11 | 77383919 | 77384587 |
| chr11 | 77384913 | 77385126 |
| chr11 | 77385669 | 77385959 |
| chr11 | 77386413 | 77386643 |
| chr11 | 77397645 | 77397830 |
| chr11 | 77431201 | 77431412 |
| chr11 | 77440757 | 77441091 |
| chr11 | 77441091 | 77441386 |
| chr11 | 77445153 | 77445340 |
| chr11 | 77446418 | 77447076 |
| chr11 | 77459038 | 77459196 |
| chr11 | 77462459 | 77462701 |
| chr11 | 77464660 | 77465312 |
| chr11 | 77465672 | 77465866 |
| chr11 | 77466103 | 77466400 |
| chr11 | 77466400 | 77466600 |

|       |          |          |
|-------|----------|----------|
| chr11 | 77466600 | 77466873 |
| chr11 | 77467069 | 77467421 |
| chr11 | 77467921 | 77468086 |
| chr11 | 77477447 | 77477784 |
| chr11 | 77482988 | 77483408 |
| chr11 | 77483461 | 77483617 |
| chr11 | 77483627 | 77484184 |
| chr11 | 77488813 | 77489043 |
| chr11 | 77489971 | 77490179 |
| chr11 | 77491109 | 77491344 |
| chr11 | 77491438 | 77491761 |
| chr11 | 77491761 | 77492024 |
| chr11 | 77492851 | 77493044 |
| chr11 | 77493097 | 77493400 |
| chr11 | 77494115 | 77494355 |
| chr11 | 77495566 | 77495866 |
| chr11 | 77497097 | 77497373 |
| chr11 | 77497373 | 77497660 |
| chr11 | 77500455 | 77500911 |
| chr11 | 77500911 | 77501253 |
| chr11 | 77501480 | 77501709 |
| chr11 | 77506499 | 77506657 |
| chr11 | 77507501 | 77507776 |
| chr11 | 77507776 | 77508042 |
| chr11 | 77508094 | 77508402 |
| chr11 | 77512839 | 77513175 |
| chr11 | 77513175 | 77513784 |
| chr11 | 77513856 | 77514030 |
| chr11 | 77514855 | 77515355 |
| chr11 | 77515355 | 77515705 |
| chr11 | 77525847 | 77526139 |
| chr11 | 77526187 | 77526498 |
| chr11 | 77577873 | 77578038 |
| chr11 | 77606815 | 77607079 |
| chr11 | 77607079 | 77607317 |
| chr11 | 77607317 | 77607532 |
| chr11 | 77607532 | 77607819 |
| chr11 | 77607819 | 77608335 |
| chr11 | 77613413 | 77613904 |
| chr11 | 77624441 | 77624705 |
| chr11 | 77624721 | 77624923 |
| chr11 | 77625111 | 77625450 |

|       |          |          |
|-------|----------|----------|
| chr11 | 77629591 | 77629844 |
| chr11 | 77630030 | 77630217 |
| chr11 | 77630217 | 77630426 |
| chr11 | 77630426 | 77630700 |
| chr11 | 77646628 | 77646801 |
| chr11 | 77648981 | 77649233 |
| chr11 | 77649323 | 77649670 |
| chr11 | 77649670 | 77650026 |
| chr11 | 77650026 | 77650232 |
| chr11 | 77650232 | 77650459 |
| chr11 | 77672364 | 77672699 |
| chr11 | 77672772 | 77673276 |
| chr11 | 77673489 | 77673751 |
| chr11 | 77685687 | 77686259 |
| chr11 | 77686259 | 77686564 |
| chr11 | 77686564 | 77686817 |
| chr11 | 77686876 | 77687103 |
| chr11 | 77687138 | 77687365 |
| chr11 | 77687365 | 77687620 |
| chr11 | 77704120 | 77704309 |
| chr11 | 77724119 | 77724269 |
| chr11 | 77737347 | 77737612 |
| chr11 | 77739467 | 77739619 |
| chr11 | 77744027 | 77744409 |
| chr11 | 77758454 | 77758703 |
| chr11 | 77763087 | 77763414 |
| chr11 | 77763414 | 77763668 |
| chr11 | 77763799 | 77763996 |
| chr11 | 77763996 | 77764330 |
| chr11 | 77764660 | 77764862 |
| chr11 | 77765134 | 77765447 |
| chr11 | 77765447 | 77765775 |
| chr11 | 77766351 | 77766581 |
| chr11 | 77766581 | 77766905 |
| chr11 | 77771742 | 77772146 |
| chr11 | 77772146 | 77772823 |
| chr11 | 77783217 | 77783749 |
| chr11 | 77783749 | 77784018 |
| chr11 | 77784018 | 77784297 |
| chr11 | 77784343 | 77784575 |
| chr11 | 77785812 | 77786105 |
| chr11 | 77786105 | 77786355 |

|       |          |          |
|-------|----------|----------|
| chr11 | 77786355 | 77786652 |
| chr11 | 77791212 | 77791473 |
| chr11 | 77791476 | 77791636 |
| chr11 | 77791829 | 77792263 |
| chr11 | 77792798 | 77792950 |
| chr11 | 77793175 | 77793608 |
| chr11 | 77801080 | 77801469 |
| chr11 | 77801483 | 77801633 |
| chr11 | 77807961 | 77808250 |
| chr11 | 77808250 | 77808618 |
| chr11 | 77810811 | 77811157 |
| chr11 | 77815884 | 77816093 |
| chr11 | 77816093 | 77816356 |
| chr11 | 77821722 | 77821951 |
| chr11 | 77822751 | 77823150 |
| chr11 | 77825909 | 77826165 |
| chr11 | 77827278 | 77827575 |
| chr11 | 77835191 | 77835415 |
| chr11 | 77836779 | 77837097 |
| chr11 | 77840041 | 77840198 |
| chr11 | 77849222 | 77849427 |
| chr11 | 77850337 | 77850518 |
| chr11 | 77850518 | 77850707 |
| chr11 | 77854331 | 77854499 |
| chr11 | 77857860 | 77858015 |
| chr11 | 77859583 | 77859747 |
| chr11 | 77864760 | 77864914 |
| chr11 | 77872462 | 77872668 |
| chr11 | 77872709 | 77873206 |
| chr11 | 77873216 | 77873459 |
| chr11 | 77874762 | 77874921 |
| chr11 | 77884546 | 77884953 |
| chr11 | 77893869 | 77894048 |
| chr11 | 77894099 | 77894290 |
| chr11 | 77927771 | 77928240 |
| chr11 | 77930717 | 77931035 |
| chr11 | 77931035 | 77931319 |
| chr11 | 77941422 | 77941667 |
| chr11 | 77943009 | 77943161 |
| chr11 | 77943708 | 77943858 |
| chr11 | 77948185 | 77948554 |
| chr11 | 77951348 | 77951499 |

|       |          |          |
|-------|----------|----------|
| chr11 | 77953735 | 77953979 |
| chr11 | 77959096 | 77959311 |
| chr11 | 77961033 | 77961237 |
| chr11 | 77964442 | 77964776 |
| chr11 | 77967205 | 77967456 |
| chr11 | 77971525 | 77971725 |
| chr11 | 77974205 | 77974406 |
| chr11 | 77975164 | 77975428 |
| chr11 | 77975523 | 77975765 |
| chr11 | 77981615 | 77982071 |
| chr11 | 77982345 | 77983104 |
| chr11 | 77983609 | 77983809 |
| chr11 | 77984364 | 77984651 |
| chr11 | 77989484 | 77989697 |
| chr11 | 78019559 | 78019718 |
| chr11 | 78019754 | 78020005 |
| chr11 | 78021768 | 78021896 |
| chr11 | 78021896 | 78022047 |
| chr11 | 78023690 | 78023927 |
| chr11 | 78031828 | 78032211 |
| chr11 | 78032211 | 78032433 |
| chr11 | 78032433 | 78032864 |
| chr11 | 78037687 | 78038058 |
| chr11 | 78038058 | 78038290 |
| chr11 | 78038290 | 78038554 |
| chr11 | 78038569 | 78038761 |
| chr11 | 78039286 | 78039546 |
| chr11 | 78044786 | 78044983 |
| chr11 | 78060228 | 78060447 |
| chr11 | 78060447 | 78060728 |
| chr11 | 78079930 | 78080533 |
| chr11 | 78080533 | 78080918 |
| chr11 | 78094480 | 78094839 |
| chr11 | 78094839 | 78095270 |
| chr11 | 78102191 | 78102493 |
| chr11 | 78115174 | 78115631 |
| chr11 | 78115631 | 78115909 |
| chr11 | 78121271 | 78121470 |
| chr11 | 78135433 | 78135598 |
| chr11 | 78146262 | 78146479 |
| chr11 | 78146516 | 78146671 |
| chr11 | 78146674 | 78146961 |

|       |          |          |
|-------|----------|----------|
| chr11 | 78146961 | 78147326 |
| chr11 | 78151258 | 78151520 |
| chr11 | 78154093 | 78154281 |
| chr11 | 78154338 | 78154704 |
| chr11 | 78159115 | 78159457 |
| chr11 | 78159510 | 78159651 |
| chr11 | 78159651 | 78159791 |
| chr11 | 78163212 | 78163501 |
| chr11 | 78164930 | 78165356 |
| chr11 | 78165378 | 78165790 |
| chr11 | 78165790 | 78166161 |
| chr11 | 78166314 | 78166464 |
| chr11 | 78172128 | 78172353 |
| chr11 | 78176278 | 78176529 |
| chr11 | 78176593 | 78176876 |
| chr11 | 78176886 | 78177279 |
| chr11 | 78177393 | 78177767 |
| chr11 | 78177802 | 78178355 |
| chr11 | 78178355 | 78178806 |
| chr11 | 78178806 | 78179111 |
| chr11 | 78179111 | 78179383 |
| chr11 | 78183203 | 78183460 |
| chr11 | 78183460 | 78183765 |
| chr11 | 78188251 | 78188522 |
| chr11 | 78188522 | 78188829 |
| chr11 | 78188829 | 78189208 |
| chr11 | 78189208 | 78189528 |
| chr11 | 78189528 | 78189739 |
| chr11 | 78189739 | 78189962 |
| chr11 | 78193185 | 78193484 |
| chr11 | 78194692 | 78194850 |
| chr11 | 78194948 | 78195142 |
| chr11 | 78200652 | 78200807 |
| chr11 | 78203730 | 78203890 |
| chr11 | 78204034 | 78204336 |
| chr11 | 78210012 | 78210186 |
| chr11 | 78210754 | 78210998 |
| chr11 | 78222624 | 78222921 |
| chr11 | 78236312 | 78236463 |
| chr11 | 78237926 | 78238217 |
| chr11 | 78245373 | 78245593 |
| chr11 | 78245593 | 78245851 |



|       |          |          |
|-------|----------|----------|
| chr11 | 78245851 | 78246113 |
| chr11 | 78246113 | 78246429 |
| chr11 | 78246845 | 78247363 |
| chr11 | 78247890 | 78248089 |
| chr11 | 78254647 | 78254889 |
| chr11 | 78260484 | 78260796 |
| chr11 | 78260815 | 78261005 |
| chr11 | 78261282 | 78261619 |
| chr11 | 78261619 | 78261845 |
| chr11 | 78261845 | 78262106 |
| chr11 | 78262106 | 78262348 |
| chr11 | 78262671 | 78262882 |
| chr11 | 78271426 | 78271581 |
| chr11 | 78276264 | 78276467 |
| chr11 | 78301258 | 78301655 |
| chr11 | 78301655 | 78301891 |
| chr11 | 78301891 | 78302086 |
| chr11 | 78322703 | 78323332 |
| chr11 | 78328148 | 78328522 |
| chr11 | 78328522 | 78329103 |
| chr11 | 78343318 | 78343607 |
| chr11 | 78343607 | 78343911 |
| chr11 | 78344041 | 78344244 |
| chr11 | 78347424 | 78347680 |
| chr11 | 78348446 | 78348833 |
| chr11 | 78355571 | 78355721 |
| chr11 | 78356731 | 78356920 |
| chr11 | 78360151 | 78360359 |
| chr11 | 78360565 | 78360988 |
| chr11 | 78363015 | 78363316 |
| chr11 | 78363316 | 78363622 |
| chr11 | 78363643 | 78364011 |
| chr11 | 78364132 | 78364316 |
| chr11 | 78370115 | 78370416 |
| chr11 | 78370416 | 78370716 |
| chr11 | 78370716 | 78370991 |
| chr11 | 78372204 | 78372558 |
| chr11 | 78377630 | 78377865 |
| chr11 | 78377865 | 78378069 |
| chr11 | 78381489 | 78381697 |
| chr11 | 78382342 | 78382593 |
| chr11 | 78382708 | 78383118 |

|       |          |          |
|-------|----------|----------|
| chr11 | 78386499 | 78387016 |
| chr11 | 78392829 | 78392993 |
| chr11 | 78395164 | 78395371 |
| chr11 | 78396949 | 78397379 |
| chr11 | 78397379 | 78397766 |
| chr11 | 78397766 | 78398029 |
| chr11 | 78398488 | 78398727 |
| chr11 | 78398727 | 78399005 |
| chr11 | 78399544 | 78399733 |
| chr11 | 78399767 | 78400020 |
| chr11 | 78411645 | 78411971 |
| chr11 | 78411971 | 78412350 |
| chr11 | 78415897 | 78416094 |
| chr11 | 78418536 | 78418719 |
| chr11 | 78421548 | 78421902 |
| chr11 | 78421902 | 78422347 |
| chr11 | 78434116 | 78434349 |
| chr11 | 78435769 | 78436016 |
| chr11 | 78436016 | 78436295 |
| chr11 | 78437217 | 78437463 |
| chr11 | 78447148 | 78447564 |
| chr11 | 78448280 | 78448622 |
| chr11 | 78453842 | 78454006 |
| chr11 | 78454237 | 78454717 |
| chr11 | 78455331 | 78455645 |
| chr11 | 78462778 | 78462976 |
| chr11 | 78463005 | 78463360 |
| chr11 | 78463360 | 78463610 |
| chr11 | 78463704 | 78464029 |
| chr11 | 78465543 | 78465795 |
| chr11 | 78465875 | 78466240 |
| chr11 | 78472993 | 78473546 |
| chr11 | 78477602 | 78477760 |
| chr11 | 78480736 | 78480952 |
| chr11 | 78486227 | 78486582 |
| chr11 | 78488220 | 78488626 |
| chr11 | 78490800 | 78491096 |
| chr11 | 78491111 | 78491350 |
| chr11 | 78491829 | 78492203 |
| chr11 | 78497152 | 78497526 |
| chr11 | 78497583 | 78498011 |
| chr11 | 78498015 | 78498207 |

|       |          |          |
|-------|----------|----------|
| chr11 | 78509250 | 78509473 |
| chr11 | 78511828 | 78512362 |
| chr11 | 78512362 | 78512581 |
| chr11 | 78512581 | 78512762 |
| chr11 | 78522657 | 78522886 |
| chr11 | 78522886 | 78523075 |
| chr11 | 78523612 | 78523918 |
| chr11 | 78524021 | 78524325 |
| chr11 | 78528470 | 78528596 |
| chr11 | 78528596 | 78528750 |
| chr11 | 78535436 | 78535723 |
| chr11 | 78535844 | 78536723 |
| chr11 | 78544723 | 78544921 |
| chr11 | 78550239 | 78551050 |
| chr11 | 78552414 | 78552636 |
| chr11 | 78557341 | 78557768 |
| chr11 | 78560499 | 78560777 |
| chr11 | 78611390 | 78611613 |
| chr11 | 78648369 | 78648748 |
| chr11 | 78657796 | 78658184 |
| chr11 | 78658184 | 78658564 |
| chr11 | 78658564 | 78658987 |
| chr11 | 78658989 | 78659258 |
| chr11 | 78659352 | 78659668 |
| chr11 | 78659668 | 78659976 |
| chr11 | 78697000 | 78697366 |
| chr11 | 78697366 | 78697757 |
| chr11 | 78697757 | 78698214 |
| chr11 | 78703134 | 78703532 |
| chr11 | 78706057 | 78706333 |
| chr11 | 78730948 | 78731124 |
| chr11 | 78747293 | 78747813 |
| chr11 | 78751239 | 78751545 |
| chr11 | 78751545 | 78751887 |
| chr11 | 78800322 | 78800542 |
| chr11 | 78802274 | 78802677 |
| chr11 | 78826363 | 78826565 |
| chr11 | 78826565 | 78826713 |
| chr11 | 78826713 | 78827040 |
| chr11 | 78828426 | 78828706 |
| chr11 | 78829494 | 78829766 |
| chr11 | 78833093 | 78833354 |

|       |          |          |
|-------|----------|----------|
| chr11 | 78838127 | 78838365 |
| chr11 | 78846673 | 78846844 |
| chr11 | 78856265 | 78856637 |
| chr11 | 78856637 | 78856938 |
| chr11 | 78860187 | 78860449 |
| chr11 | 78864826 | 78865283 |
| chr11 | 78865424 | 78865805 |
| chr11 | 78866528 | 78866836 |
| chr11 | 78872688 | 78872855 |
| chr11 | 78875932 | 78876590 |
| chr11 | 78882303 | 78882710 |
| chr11 | 78886803 | 78887036 |
| chr11 | 78887040 | 78887458 |
| chr11 | 78889170 | 78889444 |
| chr11 | 78896767 | 78897077 |
| chr11 | 78915500 | 78915699 |
| chr11 | 78916539 | 78916734 |
| chr11 | 78920532 | 78920814 |
| chr11 | 78923083 | 78923355 |
| chr11 | 78924994 | 78925402 |
| chr11 | 78929406 | 78929614 |
| chr11 | 78943085 | 78943352 |
| chr11 | 78952554 | 78952850 |
| chr11 | 78956358 | 78956595 |
| chr11 | 78956622 | 78956794 |
| chr11 | 78959957 | 78960113 |
| chr11 | 78967450 | 78967719 |
| chr11 | 78968170 | 78968329 |
| chr11 | 78982059 | 78982363 |
| chr11 | 78984465 | 78984822 |
| chr11 | 78984822 | 78985180 |
| chr11 | 78985180 | 78985386 |
| chr11 | 79002422 | 79002718 |
| chr11 | 79002718 | 79002986 |
| chr11 | 79019026 | 79019304 |
| chr11 | 79019340 | 79019792 |
| chr11 | 79019925 | 79020169 |
| chr11 | 79030633 | 79030944 |
| chr11 | 79030944 | 79031456 |
| chr11 | 79039665 | 79039820 |
| chr11 | 79039986 | 79040131 |
| chr11 | 79040131 | 79040293 |

|       |          |          |
|-------|----------|----------|
| chr11 | 79059751 | 79060312 |
| chr11 | 79064289 | 79064675 |
| chr11 | 79064822 | 79065030 |
| chr11 | 79071249 | 79071550 |
| chr11 | 79071550 | 79072095 |
| chr11 | 79083229 | 79083587 |
| chr11 | 79085031 | 79085622 |
| chr11 | 79087684 | 79088032 |
| chr11 | 79093921 | 79094293 |
| chr11 | 79094293 | 79094614 |
| chr11 | 79096312 | 79096547 |
| chr11 | 79097582 | 79097773 |
| chr11 | 79103170 | 79103431 |
| chr11 | 79103431 | 79103733 |
| chr11 | 79104942 | 79105373 |
| chr11 | 79105715 | 79105948 |
| chr11 | 79111872 | 79112251 |
| chr11 | 79112251 | 79112547 |
| chr11 | 79112547 | 79112892 |
| chr11 | 79112960 | 79113178 |
| chr11 | 79130071 | 79130247 |
| chr11 | 79131678 | 79132559 |
| chr11 | 79140813 | 79140999 |
| chr11 | 79141387 | 79141542 |
| chr11 | 79145659 | 79145877 |
| chr11 | 79145900 | 79146256 |
| chr11 | 79146256 | 79146755 |
| chr11 | 79151898 | 79152271 |
| chr11 | 79152753 | 79152920 |
| chr11 | 79166462 | 79166612 |
| chr11 | 79176791 | 79176972 |
| chr11 | 79180221 | 79180519 |
| chr11 | 79181864 | 79182260 |
| chr11 | 79182260 | 79182585 |
| chr11 | 79188084 | 79188498 |
| chr11 | 79188498 | 79188752 |
| chr11 | 79196123 | 79196508 |
| chr11 | 79196524 | 79197023 |
| chr11 | 79197191 | 79197462 |
| chr11 | 79197470 | 79197791 |
| chr11 | 79213799 | 79214527 |
| chr11 | 79224490 | 79225161 |

|       |          |          |
|-------|----------|----------|
| chr11 | 79231507 | 79231776 |
| chr11 | 79232152 | 79232312 |
| chr11 | 79237578 | 79237749 |
| chr11 | 79237749 | 79237930 |
| chr11 | 79238070 | 79238273 |
| chr11 | 79245501 | 79245777 |
| chr11 | 79245777 | 79246114 |
| chr11 | 79251644 | 79251795 |
| chr11 | 79253170 | 79253485 |
| chr11 | 79253485 | 79253764 |
| chr11 | 79253984 | 79254255 |
| chr11 | 79254322 | 79254917 |
| chr11 | 79263547 | 79263883 |
| chr11 | 79264380 | 79264736 |
| chr11 | 79264770 | 79265023 |
| chr11 | 79265102 | 79265253 |
| chr11 | 79271549 | 79271725 |
| chr11 | 79273109 | 79273321 |
| chr11 | 79276208 | 79276488 |
| chr11 | 79278743 | 79278979 |
| chr11 | 79287136 | 79287389 |
| chr11 | 79287389 | 79287843 |
| chr11 | 79290553 | 79290813 |
| chr11 | 79296243 | 79296433 |
| chr11 | 79303957 | 79304457 |
| chr11 | 79306604 | 79306877 |
| chr11 | 79306998 | 79307265 |
| chr11 | 79308240 | 79308670 |
| chr11 | 79315719 | 79316063 |
| chr11 | 79323301 | 79323472 |
| chr11 | 79339192 | 79339777 |
| chr11 | 79339777 | 79340083 |
| chr11 | 79340083 | 79340387 |
| chr11 | 79357491 | 79357713 |
| chr11 | 79366463 | 79366614 |
| chr11 | 79398420 | 79398695 |
| chr11 | 79409433 | 79409768 |
| chr11 | 79413241 | 79413623 |
| chr11 | 79413658 | 79413844 |
| chr11 | 79413844 | 79414066 |
| chr11 | 79414247 | 79414397 |
| chr11 | 79427728 | 79427986 |

|       |          |          |
|-------|----------|----------|
| chr11 | 79485392 | 79485552 |
| chr11 | 79489517 | 79489937 |
| chr11 | 79530480 | 79530675 |
| chr11 | 79534085 | 79534343 |
| chr11 | 79534343 | 79534686 |
| chr11 | 79577781 | 79578081 |
| chr11 | 79583968 | 79584355 |
| chr11 | 79584355 | 79584544 |
| chr11 | 79585173 | 79585379 |
| chr11 | 79585379 | 79585586 |
| chr11 | 79590701 | 79590858 |
| chr11 | 79590912 | 79591090 |
| chr11 | 79591116 | 79591506 |
| chr11 | 79593581 | 79593827 |
| chr11 | 79611022 | 79611745 |
| chr11 | 79623139 | 79623341 |
| chr11 | 79624714 | 79624946 |
| chr11 | 79624946 | 79625330 |
| chr11 | 79628795 | 79629021 |
| chr11 | 79633174 | 79633747 |
| chr11 | 79635051 | 79635222 |
| chr11 | 79640062 | 79640247 |
| chr11 | 79642929 | 79643095 |
| chr11 | 79653319 | 79653795 |
| chr11 | 79654003 | 79654168 |
| chr11 | 79654392 | 79654889 |
| chr11 | 79655720 | 79655874 |
| chr11 | 79660291 | 79661116 |
| chr11 | 79666494 | 79666874 |
| chr11 | 79669157 | 79669307 |
| chr11 | 79671812 | 79672024 |
| chr11 | 79680649 | 79680801 |
| chr11 | 79686632 | 79686836 |
| chr11 | 79686836 | 79687252 |
| chr11 | 79689999 | 79690244 |
| chr11 | 79698106 | 79698540 |
| chr11 | 79703484 | 79703848 |
| chr11 | 79703920 | 79704265 |
| chr11 | 79704265 | 79704706 |
| chr11 | 79704706 | 79705112 |
| chr11 | 79710797 | 79711133 |
| chr11 | 79711133 | 79711443 |

|       |          |          |
|-------|----------|----------|
| chr11 | 79711443 | 79711746 |
| chr11 | 79711769 | 79712001 |
| chr11 | 79712834 | 79712988 |
| chr11 | 79729449 | 79729983 |
| chr11 | 79736751 | 79736968 |
| chr11 | 79738079 | 79738420 |
| chr11 | 79738789 | 79739005 |
| chr11 | 79739041 | 79739771 |
| chr11 | 79746632 | 79746955 |
| chr11 | 79750028 | 79750365 |
| chr11 | 79752287 | 79752685 |
| chr11 | 79752744 | 79753067 |
| chr11 | 79753067 | 79753394 |
| chr11 | 79753394 | 79753623 |
| chr11 | 79761309 | 79761473 |
| chr11 | 79761880 | 79762467 |
| chr11 | 79771303 | 79771860 |
| chr11 | 79773877 | 79774063 |
| chr11 | 79778512 | 79778919 |
| chr11 | 79779700 | 79780054 |
| chr11 | 79780189 | 79780499 |
| chr11 | 79781211 | 79781566 |
| chr11 | 79784969 | 79785129 |
| chr11 | 79786217 | 79786603 |
| chr11 | 79790188 | 79790524 |
| chr11 | 79793426 | 79793578 |
| chr11 | 79793900 | 79794213 |
| chr11 | 79794213 | 79794548 |
| chr11 | 79804034 | 79804328 |
| chr11 | 79804389 | 79804539 |
| chr11 | 79815335 | 79815485 |
| chr11 | 79825966 | 79826177 |
| chr11 | 79843097 | 79843277 |
| chr11 | 79854876 | 79855159 |
| chr11 | 79866605 | 79866755 |
| chr11 | 79871820 | 79872140 |
| chr11 | 79872328 | 79872562 |
| chr11 | 79883105 | 79883285 |
| chr11 | 79884919 | 79885135 |
| chr11 | 79889609 | 79889863 |
| chr11 | 79901149 | 79901572 |
| chr11 | 79901671 | 79901956 |



|       |          |          |
|-------|----------|----------|
| chr11 | 79908645 | 79908884 |
| chr11 | 79913150 | 79913324 |
| chr11 | 79916040 | 79916359 |
| chr11 | 79916435 | 79916638 |
| chr11 | 79919820 | 79920230 |
| chr11 | 79920255 | 79920425 |
| chr11 | 79943566 | 79944054 |
| chr11 | 79961450 | 79961605 |
| chr11 | 79961854 | 79962063 |
| chr11 | 79962063 | 79962275 |
| chr11 | 79962275 | 79962580 |
| chr11 | 79962580 | 79962872 |
| chr11 | 79962872 | 79963024 |
| chr11 | 79973685 | 79973862 |
| chr11 | 79974172 | 79974483 |
| chr11 | 79979786 | 79980043 |
| chr11 | 79982192 | 79982366 |
| chr11 | 79992471 | 79992814 |
| chr11 | 79992814 | 79993902 |
| chr11 | 80009158 | 80009356 |
| chr11 | 80019928 | 80020101 |
| chr11 | 80041667 | 80041817 |
| chr11 | 80042518 | 80042929 |
| chr11 | 80042932 | 80043182 |
| chr11 | 80050015 | 80050428 |
| chr11 | 80078857 | 80079055 |
| chr11 | 80080467 | 80080781 |
| chr11 | 80080781 | 80081231 |
| chr11 | 80081231 | 80081662 |
| chr11 | 80085364 | 80085896 |
| chr11 | 80086930 | 80087180 |
| chr11 | 80088161 | 80088353 |
| chr11 | 80089309 | 80089517 |
| chr11 | 80089517 | 80089885 |
| chr11 | 80091580 | 80091745 |
| chr11 | 80136850 | 80137029 |
| chr11 | 80141631 | 80142026 |
| chr11 | 80142026 | 80142296 |
| chr11 | 80142296 | 80142574 |
| chr11 | 80142951 | 80143204 |
| chr11 | 80144225 | 80144466 |
| chr11 | 80145660 | 80145892 |

|       |          |          |
|-------|----------|----------|
| chr11 | 80146039 | 80146328 |
| chr11 | 80152082 | 80152613 |
| chr11 | 80153174 | 80153429 |
| chr11 | 80153832 | 80154161 |
| chr11 | 80154161 | 80154549 |
| chr11 | 80171903 | 80172270 |
| chr11 | 80175632 | 80175784 |
| chr11 | 80176095 | 80176353 |
| chr11 | 80183333 | 80183682 |
| chr11 | 80183682 | 80184324 |
| chr11 | 80196927 | 80197131 |
| chr11 | 80199876 | 80200047 |
| chr11 | 80200439 | 80200654 |
| chr11 | 80208653 | 80209029 |
| chr11 | 80209029 | 80209362 |
| chr11 | 80209362 | 80209808 |
| chr11 | 80224790 | 80224973 |
| chr11 | 80234182 | 80234455 |
| chr11 | 80234455 | 80234713 |
| chr11 | 80264237 | 80264411 |
| chr11 | 80284673 | 80284823 |
| chr11 | 80287189 | 80287491 |
| chr11 | 80290046 | 80290403 |
| chr11 | 80300612 | 80300818 |
| chr11 | 80300818 | 80301043 |
| chr11 | 80301043 | 80301324 |
| chr11 | 80301473 | 80301739 |
| chr11 | 80301739 | 80302073 |
| chr11 | 80302073 | 80302385 |
| chr11 | 80302641 | 80302931 |
| chr11 | 80311074 | 80311300 |
| chr11 | 80319037 | 80319187 |
| chr11 | 80333846 | 80334332 |
| chr11 | 80336610 | 80336766 |
| chr11 | 80351335 | 80351485 |
| chr11 | 80351853 | 80352159 |
| chr11 | 80353887 | 80354139 |
| chr11 | 80354931 | 80355206 |
| chr11 | 80376614 | 80376936 |
| chr11 | 80377608 | 80377938 |
| chr11 | 80377938 | 80378174 |
| chr11 | 80378174 | 80378394 |

|       |          |          |
|-------|----------|----------|
| chr11 | 80382837 | 80383031 |
| chr11 | 80383064 | 80383374 |
| chr11 | 80383374 | 80383621 |
| chr11 | 80383621 | 80383975 |
| chr11 | 80384637 | 80384795 |
| chr11 | 80405275 | 80405462 |
| chr11 | 80407555 | 80407737 |
| chr11 | 80408195 | 80408413 |
| chr11 | 80417102 | 80417594 |
| chr11 | 80420197 | 80420359 |
| chr11 | 80428238 | 80428722 |
| chr11 | 80428722 | 80429117 |
| chr11 | 80429117 | 80429511 |
| chr11 | 80430439 | 80430815 |
| chr11 | 80437519 | 80437674 |
| chr11 | 80453293 | 80453472 |
| chr11 | 80457389 | 80457916 |
| chr11 | 80460736 | 80460902 |
| chr11 | 80476436 | 80476880 |
| chr11 | 80476880 | 80477267 |
| chr11 | 80477267 | 80477597 |
| chr11 | 80484297 | 80484810 |
| chr11 | 80489487 | 80489655 |
| chr11 | 80489655 | 80489917 |
| chr11 | 80490881 | 80491172 |
| chr11 | 80496034 | 80496391 |
| chr11 | 80496689 | 80497052 |
| chr11 | 80499562 | 80500088 |
| chr11 | 80504870 | 80505441 |
| chr11 | 80521185 | 80521380 |
| chr11 | 80529228 | 80529500 |
| chr11 | 80529500 | 80529937 |
| chr11 | 80532791 | 80533352 |
| chr11 | 80539042 | 80539473 |
| chr11 | 80554046 | 80554296 |
| chr11 | 80554329 | 80554711 |
| chr11 | 80562553 | 80562774 |
| chr11 | 80595621 | 80595810 |
| chr11 | 80598576 | 80598745 |
| chr11 | 80599176 | 80599390 |
| chr11 | 80602071 | 80602227 |
| chr11 | 80602709 | 80602927 |

|       |          |          |
|-------|----------|----------|
| chr11 | 80613643 | 80613825 |
| chr11 | 80629104 | 80629911 |
| chr11 | 80634013 | 80634229 |
| chr11 | 80655224 | 80655511 |
| chr11 | 80656290 | 80656499 |
| chr11 | 80658882 | 80659116 |
| chr11 | 80659126 | 80659285 |
| chr11 | 80664404 | 80664663 |
| chr11 | 80670473 | 80670771 |
| chr11 | 80672713 | 80673093 |
| chr11 | 80696208 | 80696358 |
| chr11 | 80696424 | 80696707 |
| chr11 | 80700623 | 80700973 |
| chr11 | 80701637 | 80702279 |
| chr11 | 80711355 | 80711725 |
| chr11 | 80712494 | 80712673 |
| chr11 | 80712693 | 80713028 |
| chr11 | 80713696 | 80714110 |
| chr11 | 80714721 | 80714942 |
| chr11 | 80716674 | 80716851 |
| chr11 | 80719015 | 80719458 |
| chr11 | 80719543 | 80720049 |
| chr11 | 80721692 | 80721880 |
| chr11 | 80723502 | 80723669 |
| chr11 | 80733474 | 80733709 |
| chr11 | 80734624 | 80734817 |
| chr11 | 80742684 | 80742880 |
| chr11 | 80742978 | 80743172 |
| chr11 | 80743316 | 80743602 |
| chr11 | 80752708 | 80753005 |
| chr11 | 80753731 | 80754067 |
| chr11 | 80759101 | 80759383 |
| chr11 | 80759419 | 80759790 |
| chr11 | 80759790 | 80760077 |
| chr11 | 80760091 | 80760258 |
| chr11 | 80760258 | 80760456 |
| chr11 | 80766316 | 80766640 |
| chr11 | 80766680 | 80766900 |
| chr11 | 80767196 | 80767550 |
| chr11 | 80772581 | 80772891 |
| chr11 | 80774648 | 80774886 |
| chr11 | 80775086 | 80775353 |

|       |          |          |
|-------|----------|----------|
| chr11 | 80775353 | 80775655 |
| chr11 | 80777816 | 80778013 |
| chr11 | 80778269 | 80778526 |
| chr11 | 80779329 | 80779563 |
| chr11 | 80779563 | 80779848 |
| chr11 | 80779848 | 80780327 |
| chr11 | 80784191 | 80784574 |
| chr11 | 80785749 | 80786104 |
| chr11 | 80800045 | 80800321 |
| chr11 | 80808523 | 80808857 |
| chr11 | 80809876 | 80810230 |
| chr11 | 80810230 | 80810672 |
| chr11 | 80818146 | 80818458 |
| chr11 | 80818458 | 80818705 |
| chr11 | 80819877 | 80820178 |
| chr11 | 80820178 | 80820673 |
| chr11 | 80835479 | 80835794 |
| chr11 | 80835946 | 80836178 |
| chr11 | 80851996 | 80852146 |
| chr11 | 80852971 | 80853253 |
| chr11 | 80857741 | 80857900 |
| chr11 | 80872541 | 80872838 |
| chr11 | 80873146 | 80873453 |
| chr11 | 80877451 | 80877626 |
| chr11 | 80906533 | 80906775 |
| chr11 | 80918383 | 80918692 |
| chr11 | 80949037 | 80949379 |
| chr11 | 80949379 | 80949725 |
| chr11 | 80967617 | 80967933 |
| chr11 | 80976077 | 80976711 |
| chr11 | 81151917 | 81152067 |
| chr11 | 81152209 | 81152419 |
| chr11 | 81263241 | 81263592 |
| chr11 | 81374917 | 81375149 |
| chr11 | 81391808 | 81391984 |
| chr11 | 81402287 | 81402623 |
| chr11 | 81411199 | 81411636 |
| chr11 | 81411700 | 81411984 |
| chr11 | 81412406 | 81412743 |
| chr11 | 81414653 | 81414885 |
| chr11 | 81419101 | 81419297 |
| chr11 | 81419297 | 81419507 |

|       |          |          |
|-------|----------|----------|
| chr11 | 81426625 | 81426813 |
| chr11 | 81446032 | 81446351 |
| chr11 | 81446351 | 81446845 |
| chr11 | 81534765 | 81535037 |
| chr11 | 81588705 | 81588948 |
| chr11 | 81613320 | 81613509 |
| chr11 | 81714426 | 81714631 |
| chr11 | 81908821 | 81909176 |
| chr11 | 81930960 | 81931112 |
| chr11 | 81931233 | 81931495 |
| chr11 | 81942352 | 81942510 |
| chr11 | 82015198 | 82015409 |
| chr11 | 82035474 | 82035646 |
| chr11 | 82168418 | 82168601 |
| chr11 | 82174861 | 82175278 |
| chr11 | 82177850 | 82178091 |
| chr11 | 82235672 | 82235892 |
| chr11 | 82612068 | 82612340 |
| chr11 | 82613587 | 82613826 |
| chr11 | 82739121 | 82739332 |
| chr11 | 82746211 | 82746430 |
| chr11 | 82754159 | 82754469 |
| chr11 | 82763740 | 82764085 |
| chr11 | 82764085 | 82764439 |
| chr11 | 82764439 | 82764644 |
| chr11 | 82764644 | 82764860 |
| chr11 | 82780936 | 82781234 |
| chr11 | 82781234 | 82781481 |
| chr11 | 82781481 | 82781873 |
| chr11 | 82794326 | 82794499 |
| chr11 | 82802417 | 82802640 |
| chr11 | 82806603 | 82807170 |
| chr11 | 82819419 | 82819733 |
| chr11 | 82830767 | 82831039 |
| chr11 | 82831405 | 82831562 |
| chr11 | 82840462 | 82840799 |
| chr11 | 82845625 | 82846044 |
| chr11 | 82846044 | 82846270 |
| chr11 | 82860845 | 82861128 |
| chr11 | 82861549 | 82861864 |
| chr11 | 82870088 | 82870301 |
| chr11 | 82870420 | 82870774 |

|       |          |          |
|-------|----------|----------|
| chr11 | 82870774 | 82871097 |
| chr11 | 82871097 | 82871281 |
| chr11 | 82871281 | 82871484 |
| chr11 | 82884934 | 82885115 |
| chr11 | 82886642 | 82886795 |
| chr11 | 82889601 | 82890060 |
| chr11 | 82890060 | 82890376 |
| chr11 | 82890376 | 82890839 |
| chr11 | 82907525 | 82907707 |
| chr11 | 82907715 | 82907910 |
| chr11 | 82907910 | 82908193 |
| chr11 | 82908193 | 82908592 |
| chr11 | 82911079 | 82911278 |
| chr11 | 82914843 | 82914993 |
| chr11 | 82915007 | 82915329 |
| chr11 | 82928913 | 82929252 |
| chr11 | 82929367 | 82929634 |
| chr11 | 82930712 | 82930886 |
| chr11 | 82931036 | 82931343 |
| chr11 | 82931894 | 82932191 |
| chr11 | 82932191 | 82932495 |
| chr11 | 82932957 | 82933132 |
| chr11 | 82959726 | 82959914 |
| chr11 | 83019898 | 83020169 |
| chr11 | 83027449 | 83027666 |
| chr11 | 83039233 | 83039490 |
| chr11 | 83045734 | 83045916 |
| chr11 | 83057940 | 83058150 |
| chr11 | 83063125 | 83063411 |
| chr11 | 83063853 | 83064268 |
| chr11 | 83064365 | 83064527 |
| chr11 | 83078190 | 83078417 |
| chr11 | 83079409 | 83079807 |
| chr11 | 83079807 | 83080099 |
| chr11 | 83107137 | 83107474 |
| chr11 | 83107474 | 83107709 |
| chr11 | 83192160 | 83192365 |
| chr11 | 83193197 | 83193383 |
| chr11 | 83220985 | 83221313 |
| chr11 | 83221464 | 83221712 |
| chr11 | 83231050 | 83231201 |
| chr11 | 83239799 | 83240080 |

|       |          |          |
|-------|----------|----------|
| chr11 | 83263282 | 83263462 |
| chr11 | 83270954 | 83271105 |
| chr11 | 83271144 | 83271339 |
| chr11 | 83271416 | 83271787 |
| chr11 | 83271787 | 83272053 |
| chr11 | 83272053 | 83272441 |
| chr11 | 83272441 | 83272801 |
| chr11 | 83272801 | 83273008 |
| chr11 | 83291435 | 83291875 |
| chr11 | 83292002 | 83292152 |
| chr11 | 83298588 | 83298869 |
| chr11 | 83298869 | 83299195 |
| chr11 | 83301594 | 83301753 |
| chr11 | 83302161 | 83302313 |
| chr11 | 83302491 | 83302911 |
| chr11 | 83302911 | 83303227 |
| chr11 | 83303762 | 83304152 |
| chr11 | 83326831 | 83326981 |
| chr11 | 83327560 | 83327740 |
| chr11 | 83338924 | 83339116 |
| chr11 | 83341972 | 83342376 |
| chr11 | 83342451 | 83342684 |
| chr11 | 83357518 | 83357727 |
| chr11 | 83403254 | 83403477 |
| chr11 | 83403941 | 83404161 |
| chr11 | 83405751 | 83406039 |
| chr11 | 83409102 | 83409498 |
| chr11 | 83417149 | 83417411 |
| chr11 | 83418666 | 83418986 |
| chr11 | 83421384 | 83421607 |
| chr11 | 83424758 | 83425020 |
| chr11 | 83425650 | 83425847 |
| chr11 | 83426028 | 83426184 |
| chr11 | 83427088 | 83427308 |
| chr11 | 83440122 | 83440386 |
| chr11 | 83440386 | 83440631 |
| chr11 | 83440631 | 83440869 |
| chr11 | 83440869 | 83441126 |
| chr11 | 83442938 | 83443224 |
| chr11 | 83454633 | 83454797 |
| chr11 | 83455530 | 83456073 |
| chr11 | 83457945 | 83458254 |



|       |          |          |
|-------|----------|----------|
| chr11 | 83458254 | 83458496 |
| chr11 | 83462436 | 83462650 |
| chr11 | 83462697 | 83463218 |
| chr11 | 83463236 | 83463400 |
| chr11 | 83463430 | 83463694 |
| chr11 | 83467267 | 83467646 |
| chr11 | 83468814 | 83469080 |
| chr11 | 83472306 | 83472550 |
| chr11 | 83472550 | 83472836 |
| chr11 | 83472836 | 83473179 |
| chr11 | 83473179 | 83473508 |
| chr11 | 83473508 | 83473791 |
| chr11 | 83491612 | 83491776 |
| chr11 | 83509614 | 83509880 |
| chr11 | 83510991 | 83511327 |
| chr11 | 83516910 | 83517123 |
| chr11 | 83517168 | 83517503 |
| chr11 | 83517618 | 83517778 |
| chr11 | 83522156 | 83522367 |
| chr11 | 83527145 | 83527426 |
| chr11 | 83527961 | 83528381 |
| chr11 | 83534105 | 83534413 |
| chr11 | 83534461 | 83534993 |
| chr11 | 83534993 | 83535347 |
| chr11 | 83538133 | 83538338 |
| chr11 | 83544301 | 83544474 |
| chr11 | 83550070 | 83550661 |
| chr11 | 83555530 | 83555820 |
| chr11 | 83555874 | 83556196 |
| chr11 | 83556214 | 83556409 |
| chr11 | 83556409 | 83556885 |
| chr11 | 83556896 | 83557263 |
| chr11 | 83563729 | 83564059 |
| chr11 | 83564059 | 83564306 |
| chr11 | 83564306 | 83564521 |
| chr11 | 83568828 | 83569048 |
| chr11 | 83577170 | 83577469 |
| chr11 | 83578117 | 83578339 |
| chr11 | 83580861 | 83581248 |
| chr11 | 83581930 | 83582168 |
| chr11 | 83582306 | 83582505 |
| chr11 | 83583147 | 83583641 |

|       |          |          |
|-------|----------|----------|
| chr11 | 83597619 | 83597862 |
| chr11 | 83597862 | 83598219 |
| chr11 | 83598219 | 83598782 |
| chr11 | 83606217 | 83606718 |
| chr11 | 83606718 | 83607199 |
| chr11 | 83607233 | 83607443 |
| chr11 | 83616469 | 83617073 |
| chr11 | 83620895 | 83621053 |
| chr11 | 83623389 | 83623634 |
| chr11 | 83623634 | 83623991 |
| chr11 | 83623993 | 83624338 |
| chr11 | 83628864 | 83629147 |
| chr11 | 83630686 | 83630983 |
| chr11 | 83632114 | 83632370 |
| chr11 | 83632849 | 83633098 |
| chr11 | 83636786 | 83637180 |
| chr11 | 83639036 | 83639245 |
| chr11 | 83639618 | 83639808 |
| chr11 | 83660167 | 83660362 |
| chr11 | 83665684 | 83666197 |
| chr11 | 83674268 | 83674418 |
| chr11 | 83712737 | 83713054 |
| chr11 | 83728804 | 83729075 |
| chr11 | 83729099 | 83729596 |
| chr11 | 83730557 | 83730744 |
| chr11 | 83731043 | 83731527 |
| chr11 | 83739110 | 83739273 |
| chr11 | 83739295 | 83739567 |
| chr11 | 83753401 | 83753822 |
| chr11 | 83753822 | 83754177 |
| chr11 | 83754177 | 83754483 |
| chr11 | 83785439 | 83785692 |
| chr11 | 83786910 | 83787128 |
| chr11 | 83787299 | 83787685 |
| chr11 | 83789112 | 83789790 |
| chr11 | 83802215 | 83802416 |
| chr11 | 83805407 | 83805634 |
| chr11 | 83815767 | 83815948 |
| chr11 | 83817011 | 83817256 |
| chr11 | 83818032 | 83818285 |
| chr11 | 83818483 | 83818637 |
| chr11 | 83819839 | 83820267 |

|       |          |          |
|-------|----------|----------|
| chr11 | 83820267 | 83820608 |
| chr11 | 83822355 | 83822610 |
| chr11 | 83832441 | 83832727 |
| chr11 | 83832727 | 83832921 |
| chr11 | 83833100 | 83833364 |
| chr11 | 83834237 | 83834490 |
| chr11 | 83843517 | 83844146 |
| chr11 | 83845802 | 83846018 |
| chr11 | 83849565 | 83849827 |
| chr11 | 83849870 | 83850289 |
| chr11 | 83850333 | 83850484 |
| chr11 | 83850712 | 83850926 |
| chr11 | 83850984 | 83851470 |
| chr11 | 83851470 | 83851711 |
| chr11 | 83851948 | 83852346 |
| chr11 | 83852626 | 83852821 |
| chr11 | 83852882 | 83853056 |
| chr11 | 83853056 | 83853261 |
| chr11 | 83853276 | 83853504 |
| chr11 | 83853504 | 83853720 |
| chr11 | 83859648 | 83859870 |
| chr11 | 83869236 | 83869562 |
| chr11 | 83877552 | 83877798 |
| chr11 | 83877798 | 83878178 |
| chr11 | 83879307 | 83879498 |
| chr11 | 83882526 | 83883057 |
| chr11 | 83883872 | 83884280 |
| chr11 | 83891169 | 83891924 |
| chr11 | 83893440 | 83893635 |
| chr11 | 83895385 | 83895654 |
| chr11 | 83896289 | 83896511 |
| chr11 | 83896511 | 83896800 |
| chr11 | 83896800 | 83897143 |
| chr11 | 83902928 | 83903741 |
| chr11 | 83920196 | 83920591 |
| chr11 | 83922635 | 83922886 |
| chr11 | 83926499 | 83926714 |
| chr11 | 83926719 | 83927015 |
| chr11 | 83927170 | 83927433 |
| chr11 | 83935786 | 83936271 |
| chr11 | 83936271 | 83936673 |
| chr11 | 83941916 | 83942458 |

|       |          |          |
|-------|----------|----------|
| chr11 | 83956946 | 83957099 |
| chr11 | 83963931 | 83964263 |
| chr11 | 83964263 | 83964540 |
| chr11 | 83964540 | 83964818 |
| chr11 | 83990765 | 83990933 |
| chr11 | 83994544 | 83994712 |
| chr11 | 83995822 | 83996038 |
| chr11 | 84013502 | 84013771 |
| chr11 | 84016090 | 84016519 |
| chr11 | 84032041 | 84032367 |
| chr11 | 84032609 | 84033007 |
| chr11 | 84033495 | 84034221 |
| chr11 | 84042815 | 84043291 |
| chr11 | 84043291 | 84043814 |
| chr11 | 84055628 | 84055944 |
| chr11 | 84055944 | 84056405 |
| chr11 | 84061631 | 84061843 |
| chr11 | 84061984 | 84062266 |
| chr11 | 84062805 | 84063107 |
| chr11 | 84064615 | 84064773 |
| chr11 | 84067039 | 84067363 |
| chr11 | 84067833 | 84068014 |
| chr11 | 84068014 | 84068232 |
| chr11 | 84068232 | 84068502 |
| chr11 | 84068502 | 84068755 |
| chr11 | 84068755 | 84068972 |
| chr11 | 84069033 | 84069385 |
| chr11 | 84074226 | 84074468 |
| chr11 | 84074468 | 84074692 |
| chr11 | 84078466 | 84078696 |
| chr11 | 84079378 | 84079771 |
| chr11 | 84079793 | 84080292 |
| chr11 | 84080292 | 84080682 |
| chr11 | 84087904 | 84088373 |
| chr11 | 84088373 | 84088647 |
| chr11 | 84101047 | 84101613 |
| chr11 | 84101613 | 84101922 |
| chr11 | 84107210 | 84107394 |
| chr11 | 84116360 | 84116510 |
| chr11 | 84128924 | 84129076 |
| chr11 | 84129103 | 84129479 |
| chr11 | 84129479 | 84129757 |

|       |          |          |
|-------|----------|----------|
| chr11 | 84129757 | 84129997 |
| chr11 | 84134435 | 84134625 |
| chr11 | 84141838 | 84142068 |
| chr11 | 84150975 | 84151185 |
| chr11 | 84165755 | 84165948 |
| chr11 | 84166078 | 84166275 |
| chr11 | 84168908 | 84169207 |
| chr11 | 84179170 | 84179925 |
| chr11 | 84179925 | 84180478 |
| chr11 | 84243662 | 84243889 |
| chr11 | 84395152 | 84395354 |
| chr11 | 84411295 | 84411605 |
| chr11 | 84411623 | 84411850 |
| chr11 | 84414389 | 84414608 |
| chr11 | 84416396 | 84416753 |
| chr11 | 84428720 | 84428922 |
| chr11 | 84429617 | 84429921 |
| chr11 | 84430508 | 84430978 |
| chr11 | 84435021 | 84435171 |
| chr11 | 84436745 | 84436976 |
| chr11 | 84442261 | 84442678 |
| chr11 | 84442678 | 84442958 |
| chr11 | 84442958 | 84443323 |
| chr11 | 84512775 | 84512962 |
| chr11 | 84513054 | 84513428 |
| chr11 | 84513428 | 84513747 |
| chr11 | 84513747 | 84514053 |
| chr11 | 84520764 | 84521170 |
| chr11 | 84522608 | 84523025 |
| chr11 | 84524969 | 84525123 |
| chr11 | 84525374 | 84525580 |
| chr11 | 84529268 | 84529560 |
| chr11 | 84529764 | 84530097 |
| chr11 | 84530362 | 84530677 |
| chr11 | 84539753 | 84539989 |
| chr11 | 84560794 | 84561008 |
| chr11 | 84561170 | 84561659 |
| chr11 | 84561691 | 84562098 |
| chr11 | 84568313 | 84568556 |
| chr11 | 84618644 | 84618809 |
| chr11 | 84677829 | 84678034 |
| chr11 | 84706030 | 84706441 |

|       |          |          |
|-------|----------|----------|
| chr11 | 84706503 | 84706712 |
| chr11 | 84722098 | 84722274 |
| chr11 | 84724201 | 84724435 |
| chr11 | 84729263 | 84729469 |
| chr11 | 84750045 | 84750246 |
| chr11 | 84753861 | 84754082 |
| chr11 | 84789173 | 84789424 |
| chr11 | 84794541 | 84794859 |
| chr11 | 84797805 | 84797989 |
| chr11 | 84797989 | 84798276 |
| chr11 | 84813791 | 84814049 |
| chr11 | 84814197 | 84814413 |
| chr11 | 84818080 | 84818374 |
| chr11 | 84818675 | 84818950 |
| chr11 | 84818950 | 84819296 |
| chr11 | 84819296 | 84819745 |
| chr11 | 84828591 | 84829332 |
| chr11 | 84829332 | 84829664 |
| chr11 | 84845248 | 84845518 |
| chr11 | 84846752 | 84847086 |
| chr11 | 84847729 | 84848012 |
| chr11 | 84869664 | 84870300 |
| chr11 | 84870300 | 84870598 |
| chr11 | 84870598 | 84871043 |
| chr11 | 84871045 | 84871346 |
| chr11 | 84879721 | 84880096 |
| chr11 | 84880096 | 84880510 |
| chr11 | 84880510 | 84880972 |
| chr11 | 84880985 | 84881267 |
| chr11 | 84895293 | 84895456 |
| chr11 | 84895652 | 84895814 |
| chr11 | 84900914 | 84901114 |
| chr11 | 84901629 | 84901823 |
| chr11 | 84909454 | 84909615 |
| chr11 | 84916044 | 84916671 |
| chr11 | 84916984 | 84917276 |
| chr11 | 84918511 | 84918772 |
| chr11 | 84919415 | 84919578 |
| chr11 | 84929693 | 84929803 |
| chr11 | 84929803 | 84929855 |
| chr11 | 84935149 | 84935325 |
| chr11 | 84936139 | 84936418 |

|       |          |          |
|-------|----------|----------|
| chr11 | 84943985 | 84944399 |
| chr11 | 84955302 | 84955509 |
| chr11 | 84957687 | 84957873 |
| chr11 | 84957991 | 84958172 |
| chr11 | 84978162 | 84978441 |
| chr11 | 85126432 | 85126975 |
| chr11 | 85139580 | 85139966 |
| chr11 | 85139966 | 85140610 |
| chr11 | 85141282 | 85141481 |
| chr11 | 85142937 | 85143122 |
| chr11 | 85152292 | 85152533 |
| chr11 | 85157116 | 85157391 |
| chr11 | 85157391 | 85157816 |
| chr11 | 85169913 | 85170129 |
| chr11 | 85170129 | 85170568 |
| chr11 | 85170936 | 85171126 |
| chr11 | 85177833 | 85178355 |
| chr11 | 85181436 | 85181640 |
| chr11 | 85183022 | 85183337 |
| chr11 | 85184208 | 85184451 |
| chr11 | 85213340 | 85213604 |
| chr11 | 85214662 | 85215138 |
| chr11 | 85223387 | 85223593 |
| chr11 | 85234364 | 85234733 |
| chr11 | 85234733 | 85234987 |
| chr11 | 85234987 | 85235282 |
| chr11 | 85235282 | 85235542 |
| chr11 | 85235542 | 85235733 |
| chr11 | 85244778 | 85244963 |
| chr11 | 85248197 | 85248498 |
| chr11 | 85250470 | 85250960 |
| chr11 | 85261284 | 85261487 |
| chr11 | 85264641 | 85265038 |
| chr11 | 85265863 | 85266050 |
| chr11 | 85266182 | 85266782 |
| chr11 | 85273826 | 85274172 |
| chr11 | 85274187 | 85274542 |
| chr11 | 85277617 | 85278094 |
| chr11 | 85308879 | 85309077 |
| chr11 | 85310643 | 85310924 |
| chr11 | 85310929 | 85311215 |
| chr11 | 85311215 | 85311535 |

|       |          |          |
|-------|----------|----------|
| chr11 | 85311535 | 85311879 |
| chr11 | 85311914 | 85312193 |
| chr11 | 85312261 | 85312494 |
| chr11 | 85323631 | 85323909 |
| chr11 | 85323909 | 85324253 |
| chr11 | 85324253 | 85324559 |
| chr11 | 85334536 | 85334864 |
| chr11 | 85334864 | 85335169 |
| chr11 | 85352537 | 85352905 |
| chr11 | 85352905 | 85353470 |
| chr11 | 85359642 | 85359972 |
| chr11 | 85367694 | 85368211 |
| chr11 | 85374807 | 85375121 |
| chr11 | 85379037 | 85379424 |
| chr11 | 85382120 | 85382385 |
| chr11 | 85384376 | 85384531 |
| chr11 | 85404954 | 85405206 |
| chr11 | 85482817 | 85483100 |
| chr11 | 85483190 | 85483412 |
| chr11 | 85504960 | 85505245 |
| chr11 | 85518162 | 85518312 |
| chr11 | 85603745 | 85604050 |
| chr11 | 85609311 | 85609610 |
| chr11 | 85609610 | 85609834 |
| chr11 | 85615487 | 85615654 |
| chr11 | 85615776 | 85616006 |
| chr11 | 85626149 | 85626351 |
| chr11 | 85626945 | 85627095 |
| chr11 | 85634979 | 85635132 |
| chr11 | 85672883 | 85673036 |
| chr11 | 85673957 | 85674503 |
| chr11 | 85686157 | 85686631 |
| chr11 | 85686765 | 85687003 |
| chr11 | 85733708 | 85733885 |
| chr11 | 85740804 | 85740980 |
| chr11 | 85775421 | 85775840 |
| chr11 | 85786201 | 85786450 |
| chr11 | 85786450 | 85786774 |
| chr11 | 85789831 | 85790043 |
| chr11 | 85792502 | 85792897 |
| chr11 | 85792897 | 85793256 |
| chr11 | 85798516 | 85798747 |



|       |          |          |
|-------|----------|----------|
| chr11 | 85801461 | 85801718 |
| chr11 | 85804093 | 85804252 |
| chr11 | 85811877 | 85812255 |
| chr11 | 85812255 | 85812578 |
| chr11 | 85812578 | 85813011 |
| chr11 | 85818550 | 85818747 |
| chr11 | 85823260 | 85823533 |
| chr11 | 85831136 | 85831362 |
| chr11 | 85832066 | 85832493 |
| chr11 | 85832493 | 85832778 |
| chr11 | 85832778 | 85833028 |
| chr11 | 85833132 | 85833572 |
| chr11 | 85841907 | 85842343 |
| chr11 | 85843302 | 85843641 |
| chr11 | 85844151 | 85844458 |
| chr11 | 85844490 | 85844640 |
| chr11 | 85844681 | 85844946 |
| chr11 | 85849123 | 85849486 |
| chr11 | 85850914 | 85851254 |
| chr11 | 85864671 | 85864874 |
| chr11 | 85865012 | 85865267 |
| chr11 | 85865267 | 85865495 |
| chr11 | 85894697 | 85894934 |
| chr11 | 85894934 | 85895157 |
| chr11 | 85925300 | 85925772 |
| chr11 | 85929691 | 85930133 |
| chr11 | 85942304 | 85942488 |
| chr11 | 85953052 | 85953282 |
| chr11 | 85963063 | 85963243 |
| chr11 | 85970471 | 85970712 |
| chr11 | 85970799 | 85970982 |
| chr11 | 85972444 | 85972716 |
| chr11 | 85986201 | 85986880 |
| chr11 | 85990038 | 85990592 |
| chr11 | 86032848 | 86033346 |
| chr11 | 86050391 | 86050791 |
| chr11 | 86106744 | 86106913 |
| chr11 | 86174319 | 86174488 |
| chr11 | 86195162 | 86195389 |
| chr11 | 86200625 | 86200985 |
| chr11 | 86200985 | 86201468 |
| chr11 | 86201477 | 86201805 |

|       |          |          |
|-------|----------|----------|
| chr11 | 86246594 | 86247030 |
| chr11 | 86247344 | 86247543 |
| chr11 | 86256763 | 86257244 |
| chr11 | 86257244 | 86257458 |
| chr11 | 86257458 | 86257733 |
| chr11 | 86257733 | 86258102 |
| chr11 | 86265916 | 86266455 |
| chr11 | 86266484 | 86266853 |
| chr11 | 86315079 | 86315341 |
| chr11 | 86317077 | 86317389 |
| chr11 | 86317389 | 86317687 |
| chr11 | 86317687 | 86317925 |
| chr11 | 86323947 | 86324136 |
| chr11 | 86324224 | 86324885 |
| chr11 | 86326003 | 86326163 |
| chr11 | 86339046 | 86339343 |
| chr11 | 86346489 | 86346981 |
| chr11 | 86347133 | 86347345 |
| chr11 | 86347472 | 86347689 |
| chr11 | 86347777 | 86347927 |
| chr11 | 86351774 | 86352061 |
| chr11 | 86356335 | 86356514 |
| chr11 | 86357193 | 86357504 |
| chr11 | 86357504 | 86357787 |
| chr11 | 86357953 | 86358217 |
| chr11 | 86358217 | 86358590 |
| chr11 | 86380421 | 86380817 |
| chr11 | 86380817 | 86381130 |
| chr11 | 86381241 | 86381553 |
| chr11 | 86381553 | 86381982 |
| chr11 | 86395842 | 86396121 |
| chr11 | 86397139 | 86397323 |
| chr11 | 86407341 | 86407760 |
| chr11 | 86426873 | 86427031 |
| chr11 | 86436166 | 86436481 |
| chr11 | 86436870 | 86437185 |
| chr11 | 86454099 | 86454254 |
| chr11 | 86464352 | 86464592 |
| chr11 | 86484095 | 86484896 |
| chr11 | 86484986 | 86485220 |
| chr11 | 86490836 | 86491087 |
| chr11 | 86491379 | 86491604 |

|       |          |          |
|-------|----------|----------|
| chr11 | 86497990 | 86498238 |
| chr11 | 86506355 | 86506664 |
| chr11 | 86506664 | 86507019 |
| chr11 | 86507091 | 86507267 |
| chr11 | 86508080 | 86508313 |
| chr11 | 86527565 | 86527908 |
| chr11 | 86532927 | 86533152 |
| chr11 | 86533827 | 86533984 |
| chr11 | 86544003 | 86544584 |
| chr11 | 86544584 | 86545062 |
| chr11 | 86545099 | 86545308 |
| chr11 | 86564455 | 86564621 |
| chr11 | 86568442 | 86568757 |
| chr11 | 86568821 | 86569043 |
| chr11 | 86570162 | 86570700 |
| chr11 | 86571365 | 86571525 |
| chr11 | 86577224 | 86577624 |
| chr11 | 86578183 | 86578450 |
| chr11 | 86578789 | 86579047 |
| chr11 | 86579047 | 86579448 |
| chr11 | 86580181 | 86580483 |
| chr11 | 86580483 | 86580794 |
| chr11 | 86580794 | 86581027 |
| chr11 | 86581161 | 86581665 |
| chr11 | 86582161 | 86582347 |
| chr11 | 86582347 | 86582517 |
| chr11 | 86586752 | 86587011 |
| chr11 | 86587011 | 86587233 |
| chr11 | 86587233 | 86587681 |
| chr11 | 86588028 | 86588244 |
| chr11 | 86590148 | 86590365 |
| chr11 | 86590668 | 86590861 |
| chr11 | 86591313 | 86591466 |
| chr11 | 86592719 | 86592923 |
| chr11 | 86592985 | 86593569 |
| chr11 | 86598149 | 86598546 |
| chr11 | 86598565 | 86598944 |
| chr11 | 86602222 | 86602401 |
| chr11 | 86604798 | 86605119 |
| chr11 | 86607833 | 86608141 |
| chr11 | 86608141 | 86608403 |
| chr11 | 86610294 | 86610616 |

|       |          |          |
|-------|----------|----------|
| chr11 | 86614145 | 86614421 |
| chr11 | 86623723 | 86623956 |
| chr11 | 86623968 | 86624287 |
| chr11 | 86624287 | 86624601 |
| chr11 | 86624601 | 86624901 |
| chr11 | 86625388 | 86625601 |
| chr11 | 86641228 | 86641455 |
| chr11 | 86646228 | 86646378 |
| chr11 | 86646423 | 86646897 |
| chr11 | 86648170 | 86648448 |
| chr11 | 86650798 | 86651065 |
| chr11 | 86652136 | 86652306 |
| chr11 | 86652332 | 86652538 |
| chr11 | 86652538 | 86653052 |
| chr11 | 86653509 | 86653742 |
| chr11 | 86655810 | 86655960 |
| chr11 | 86683411 | 86683741 |
| chr11 | 86683741 | 86683937 |
| chr11 | 86683937 | 86684354 |
| chr11 | 86687407 | 86687790 |
| chr11 | 86691443 | 86691828 |
| chr11 | 86704000 | 86704290 |
| chr11 | 86724112 | 86724331 |
| chr11 | 86731560 | 86731787 |
| chr11 | 86732764 | 86732965 |
| chr11 | 86737669 | 86737890 |
| chr11 | 86745287 | 86745817 |
| chr11 | 86747275 | 86747524 |
| chr11 | 86749429 | 86749851 |
| chr11 | 86752508 | 86752740 |
| chr11 | 86756954 | 86757151 |
| chr11 | 86757225 | 86757715 |
| chr11 | 86757715 | 86758017 |
| chr11 | 86758017 | 86758326 |
| chr11 | 86760438 | 86760729 |
| chr11 | 86781289 | 86781510 |
| chr11 | 86806945 | 86807378 |
| chr11 | 86807378 | 86808012 |
| chr11 | 86811886 | 86812196 |
| chr11 | 86813276 | 86813994 |
| chr11 | 86814414 | 86814574 |
| chr11 | 86816024 | 86816352 |

|       |          |          |
|-------|----------|----------|
| chr11 | 86827500 | 86827813 |
| chr11 | 86828240 | 86828742 |
| chr11 | 86836439 | 86836745 |
| chr11 | 86837086 | 86837255 |
| chr11 | 86839737 | 86840115 |
| chr11 | 86840115 | 86840444 |
| chr11 | 86840553 | 86840867 |
| chr11 | 86851792 | 86851979 |
| chr11 | 86852711 | 86853087 |
| chr11 | 86853159 | 86853401 |
| chr11 | 86856365 | 86856822 |
| chr11 | 86859501 | 86859663 |
| chr11 | 86860340 | 86860491 |
| chr11 | 86872622 | 86872815 |
| chr11 | 86874994 | 86875192 |
| chr11 | 86879487 | 86879666 |
| chr11 | 86894053 | 86894637 |
| chr11 | 86906832 | 86907087 |
| chr11 | 86907087 | 86907339 |
| chr11 | 86907339 | 86907679 |
| chr11 | 86907936 | 86908112 |
| chr11 | 86908275 | 86908618 |
| chr11 | 86911693 | 86911987 |
| chr11 | 86913110 | 86913411 |
| chr11 | 86914402 | 86914638 |
| chr11 | 86919533 | 86919835 |
| chr11 | 86920053 | 86920749 |
| chr11 | 86932285 | 86932442 |
| chr11 | 86932690 | 86933120 |
| chr11 | 86944556 | 86944886 |
| chr11 | 86945641 | 86946039 |
| chr11 | 86946039 | 86946298 |
| chr11 | 86952649 | 86952974 |
| chr11 | 86952974 | 86953218 |
| chr11 | 86953218 | 86953496 |
| chr11 | 86961873 | 86962383 |
| chr11 | 86962399 | 86962720 |
| chr11 | 86978758 | 86978965 |
| chr11 | 86993037 | 86993481 |
| chr11 | 86993481 | 86994094 |
| chr11 | 86995691 | 86995877 |
| chr11 | 87007401 | 87007707 |

|       |          |          |
|-------|----------|----------|
| chr11 | 87010491 | 87010852 |
| chr11 | 87025172 | 87025422 |
| chr11 | 87025482 | 87025671 |
| chr11 | 87026262 | 87026506 |
| chr11 | 87026561 | 87027010 |
| chr11 | 87030318 | 87030468 |
| chr11 | 87031806 | 87032153 |
| chr11 | 87032442 | 87032682 |
| chr11 | 87036299 | 87036468 |
| chr11 | 87051457 | 87051683 |
| chr11 | 87073230 | 87073639 |
| chr11 | 87073639 | 87073937 |
| chr11 | 87073937 | 87074226 |
| chr11 | 87074226 | 87074462 |
| chr11 | 87085604 | 87085763 |
| chr11 | 87086095 | 87086249 |
| chr11 | 87086258 | 87086594 |
| chr11 | 87086594 | 87087120 |
| chr11 | 87108562 | 87108878 |
| chr11 | 87108878 | 87109053 |
| chr11 | 87109053 | 87109383 |
| chr11 | 87109404 | 87109615 |
| chr11 | 87126698 | 87127018 |
| chr11 | 87127018 | 87127356 |
| chr11 | 87127356 | 87127738 |
| chr11 | 87214266 | 87214557 |
| chr11 | 87237904 | 87238193 |
| chr11 | 87241451 | 87241613 |
| chr11 | 87254249 | 87254455 |
| chr11 | 87261794 | 87261999 |
| chr11 | 87262785 | 87263004 |
| chr11 | 87274959 | 87275260 |
| chr11 | 87279412 | 87279570 |
| chr11 | 87294582 | 87294830 |
| chr11 | 87295632 | 87295991 |
| chr11 | 87309402 | 87310118 |
| chr11 | 87310372 | 87310785 |
| chr11 | 87346738 | 87346978 |
| chr11 | 87358092 | 87358376 |
| chr11 | 87358376 | 87358669 |
| chr11 | 87358669 | 87358930 |
| chr11 | 87358930 | 87359487 |

|       |          |          |
|-------|----------|----------|
| chr11 | 87393963 | 87394131 |
| chr11 | 87398498 | 87398685 |
| chr11 | 87404008 | 87404409 |
| chr11 | 87404409 | 87404864 |
| chr11 | 87413510 | 87413743 |
| chr11 | 87422543 | 87422704 |
| chr11 | 87422807 | 87423908 |
| chr11 | 87426636 | 87426912 |
| chr11 | 87426912 | 87427227 |
| chr11 | 87427227 | 87427907 |
| chr11 | 87442809 | 87443110 |
| chr11 | 87443149 | 87443928 |
| chr11 | 87448219 | 87448500 |
| chr11 | 87448544 | 87448913 |
| chr11 | 87448913 | 87449231 |
| chr11 | 87449231 | 87449668 |
| chr11 | 87454073 | 87454233 |
| chr11 | 87455555 | 87455901 |
| chr11 | 87461870 | 87462159 |
| chr11 | 87462198 | 87462631 |
| chr11 | 87462631 | 87463163 |
| chr11 | 87470957 | 87471242 |
| chr11 | 87471280 | 87471649 |
| chr11 | 87471649 | 87471946 |
| chr11 | 87471946 | 87472439 |
| chr11 | 87483162 | 87483555 |
| chr11 | 87483887 | 87484093 |
| chr11 | 87485933 | 87486093 |
| chr11 | 87488983 | 87489175 |
| chr11 | 87506474 | 87506700 |
| chr11 | 87510302 | 87510725 |
| chr11 | 87510949 | 87511425 |
| chr11 | 87518008 | 87518219 |
| chr11 | 87519152 | 87519641 |
| chr11 | 87548597 | 87548877 |
| chr11 | 87555160 | 87555435 |
| chr11 | 87574741 | 87575320 |
| chr11 | 87578277 | 87578695 |
| chr11 | 87581991 | 87582259 |
| chr11 | 87591675 | 87592632 |
| chr11 | 87593348 | 87593586 |
| chr11 | 87595438 | 87595768 |

|       |          |          |
|-------|----------|----------|
| chr11 | 87599416 | 87599985 |
| chr11 | 87609968 | 87610253 |
| chr11 | 87610253 | 87610778 |
| chr11 | 87620629 | 87620781 |
| chr11 | 87621612 | 87621898 |
| chr11 | 87621927 | 87622131 |
| chr11 | 87622131 | 87622346 |
| chr11 | 87623190 | 87623510 |
| chr11 | 87629936 | 87630161 |
| chr11 | 87638900 | 87639189 |
| chr11 | 87639189 | 87639655 |
| chr11 | 87651774 | 87651936 |
| chr11 | 87662372 | 87662965 |
| chr11 | 87662983 | 87663182 |
| chr11 | 87664528 | 87664742 |
| chr11 | 87678444 | 87678875 |
| chr11 | 87678896 | 87679231 |
| chr11 | 87682110 | 87682394 |
| chr11 | 87689210 | 87689474 |
| chr11 | 87689474 | 87689987 |
| chr11 | 87695730 | 87696028 |
| chr11 | 87696745 | 87696920 |
| chr11 | 87696934 | 87697621 |
| chr11 | 87702521 | 87702689 |
| chr11 | 87707603 | 87707781 |
| chr11 | 87709603 | 87709774 |
| chr11 | 87709810 | 87710537 |
| chr11 | 87722936 | 87723253 |
| chr11 | 87736527 | 87736727 |
| chr11 | 87736727 | 87737127 |
| chr11 | 87737142 | 87737409 |
| chr11 | 87737409 | 87737845 |
| chr11 | 87748776 | 87748994 |
| chr11 | 87749542 | 87749697 |
| chr11 | 87759672 | 87759854 |
| chr11 | 87763499 | 87763919 |
| chr11 | 87763919 | 87764154 |
| chr11 | 87764154 | 87764496 |
| chr11 | 87764496 | 87764869 |
| chr11 | 87770936 | 87771350 |
| chr11 | 87772455 | 87772829 |
| chr11 | 87778290 | 87779165 |



|       |          |          |
|-------|----------|----------|
| chr11 | 87782805 | 87782992 |
| chr11 | 87783590 | 87783872 |
| chr11 | 87785363 | 87785533 |
| chr11 | 87802545 | 87802941 |
| chr11 | 87805538 | 87805749 |
| chr11 | 87817019 | 87817258 |
| chr11 | 87817258 | 87817530 |
| chr11 | 87840771 | 87841023 |
| chr11 | 87847956 | 87848243 |
| chr11 | 87852055 | 87852255 |
| chr11 | 87852798 | 87852956 |
| chr11 | 87853026 | 87853348 |
| chr11 | 87854541 | 87854916 |
| chr11 | 87854916 | 87855245 |
| chr11 | 87939641 | 87939882 |
| chr11 | 87955222 | 87955466 |
| chr11 | 87966204 | 87966393 |
| chr11 | 87967671 | 87968007 |
| chr11 | 87968073 | 87968430 |
| chr11 | 87968443 | 87968650 |
| chr11 | 87968792 | 87969145 |
| chr11 | 87973976 | 87974389 |
| chr11 | 87974549 | 87974981 |
| chr11 | 87974981 | 87975195 |
| chr11 | 87986188 | 87986343 |
| chr11 | 87986391 | 87986767 |
| chr11 | 87986893 | 87987170 |
| chr11 | 87987170 | 87987439 |
| chr11 | 87987439 | 87987893 |
| chr11 | 88002860 | 88003068 |
| chr11 | 88004169 | 88004443 |
| chr11 | 88011013 | 88011581 |
| chr11 | 88011650 | 88011909 |
| chr11 | 88015974 | 88016131 |
| chr11 | 88017871 | 88018200 |
| chr11 | 88031488 | 88031640 |
| chr11 | 88045925 | 88046153 |
| chr11 | 88046599 | 88046805 |
| chr11 | 88047106 | 88047493 |
| chr11 | 88047493 | 88047886 |
| chr11 | 88047886 | 88048215 |
| chr11 | 88048215 | 88048677 |

|       |          |          |
|-------|----------|----------|
| chr11 | 88053926 | 88054270 |
| chr11 | 88054475 | 88054699 |
| chr11 | 88054699 | 88054971 |
| chr11 | 88059098 | 88059455 |
| chr11 | 88062313 | 88062557 |
| chr11 | 88067294 | 88067448 |
| chr11 | 88067700 | 88068115 |
| chr11 | 88068115 | 88068388 |
| chr11 | 88068388 | 88068611 |
| chr11 | 88068611 | 88068927 |
| chr11 | 88068927 | 88069295 |
| chr11 | 88070518 | 88070689 |
| chr11 | 88086873 | 88087275 |
| chr11 | 88090358 | 88090614 |
| chr11 | 88092014 | 88092226 |
| chr11 | 88098660 | 88098838 |
| chr11 | 88098838 | 88099065 |
| chr11 | 88099065 | 88099318 |
| chr11 | 88099318 | 88099686 |
| chr11 | 88099686 | 88100061 |
| chr11 | 88107489 | 88107791 |
| chr11 | 88107992 | 88108178 |
| chr11 | 88113643 | 88113825 |
| chr11 | 88117146 | 88117300 |
| chr11 | 88117676 | 88117946 |
| chr11 | 88137815 | 88138063 |
| chr11 | 88151274 | 88151611 |
| chr11 | 88151611 | 88151837 |
| chr11 | 88151837 | 88152058 |
| chr11 | 88152644 | 88152924 |
| chr11 | 88155107 | 88155332 |
| chr11 | 88161058 | 88161284 |
| chr11 | 88161392 | 88161596 |
| chr11 | 88161617 | 88162054 |
| chr11 | 88162054 | 88162421 |
| chr11 | 88164341 | 88164617 |
| chr11 | 88164713 | 88165410 |
| chr11 | 88168687 | 88168848 |
| chr11 | 88171974 | 88172226 |
| chr11 | 88172871 | 88173370 |
| chr11 | 88173414 | 88174226 |
| chr11 | 88179472 | 88179664 |

|       |          |          |
|-------|----------|----------|
| chr11 | 88180234 | 88180627 |
| chr11 | 88180627 | 88180945 |
| chr11 | 88180945 | 88181276 |
| chr11 | 88181276 | 88181846 |
| chr11 | 88187456 | 88187962 |
| chr11 | 88194850 | 88195072 |
| chr11 | 88197155 | 88197445 |
| chr11 | 88197502 | 88197659 |
| chr11 | 88203708 | 88203961 |
| chr11 | 88203961 | 88204215 |
| chr11 | 88204215 | 88204660 |
| chr11 | 88204664 | 88204894 |
| chr11 | 88204962 | 88205112 |
| chr11 | 88213777 | 88214156 |
| chr11 | 88214301 | 88214495 |
| chr11 | 88214568 | 88214782 |
| chr11 | 88214921 | 88215119 |
| chr11 | 88215164 | 88215573 |
| chr11 | 88215573 | 88215859 |
| chr11 | 88221625 | 88221838 |
| chr11 | 88235221 | 88235650 |
| chr11 | 88235650 | 88236120 |
| chr11 | 88247559 | 88247807 |
| chr11 | 88250576 | 88250860 |
| chr11 | 88252114 | 88252305 |
| chr11 | 88252305 | 88252584 |
| chr11 | 88252590 | 88252783 |
| chr11 | 88252981 | 88253201 |
| chr11 | 88253302 | 88253464 |
| chr11 | 88261289 | 88261456 |
| chr11 | 88262688 | 88263316 |
| chr11 | 88268155 | 88268578 |
| chr11 | 88268578 | 88268913 |
| chr11 | 88271941 | 88272189 |
| chr11 | 88280359 | 88280770 |
| chr11 | 88285966 | 88286635 |
| chr11 | 88291752 | 88291998 |
| chr11 | 88297563 | 88297804 |
| chr11 | 88307976 | 88308367 |
| chr11 | 88317601 | 88317760 |
| chr11 | 88327114 | 88327348 |
| chr11 | 88330523 | 88330694 |

|       |          |          |
|-------|----------|----------|
| chr11 | 88330857 | 88331233 |
| chr11 | 88337983 | 88338244 |
| chr11 | 88346047 | 88346419 |
| chr11 | 88352555 | 88352780 |
| chr11 | 88352780 | 88353116 |
| chr11 | 88353139 | 88353292 |
| chr11 | 88356807 | 88357297 |
| chr11 | 88365955 | 88366406 |
| chr11 | 88370101 | 88370376 |
| chr11 | 88380716 | 88380890 |
| chr11 | 88394358 | 88394627 |
| chr11 | 88399520 | 88399670 |
| chr11 | 88400037 | 88400226 |
| chr11 | 88400239 | 88400718 |
| chr11 | 88401413 | 88401731 |
| chr11 | 88412498 | 88412764 |
| chr11 | 88421024 | 88421382 |
| chr11 | 88425706 | 88425858 |
| chr11 | 88430304 | 88430499 |
| chr11 | 88449227 | 88449525 |
| chr11 | 88461519 | 88461966 |
| chr11 | 88461966 | 88462348 |
| chr11 | 88467738 | 88468390 |
| chr11 | 88477550 | 88477831 |
| chr11 | 88486121 | 88486296 |
| chr11 | 88488228 | 88488489 |
| chr11 | 88488629 | 88488828 |
| chr11 | 88495672 | 88496067 |
| chr11 | 88496067 | 88496385 |
| chr11 | 88498500 | 88498833 |
| chr11 | 88512571 | 88513015 |
| chr11 | 88522132 | 88522692 |
| chr11 | 88524499 | 88524749 |
| chr11 | 88524749 | 88525279 |
| chr11 | 88550627 | 88550796 |
| chr11 | 88550802 | 88551398 |
| chr11 | 88553125 | 88553346 |
| chr11 | 88553649 | 88553832 |
| chr11 | 88557087 | 88557454 |
| chr11 | 88557454 | 88557782 |
| chr11 | 88557811 | 88558181 |
| chr11 | 88558181 | 88558518 |

|       |          |          |
|-------|----------|----------|
| chr11 | 88560729 | 88560981 |
| chr11 | 88561160 | 88561455 |
| chr11 | 88570585 | 88570965 |
| chr11 | 88570965 | 88571282 |
| chr11 | 88593919 | 88594163 |
| chr11 | 88594912 | 88595092 |
| chr11 | 88599571 | 88600024 |
| chr11 | 88612239 | 88612478 |
| chr11 | 88612644 | 88612809 |
| chr11 | 88613694 | 88613973 |
| chr11 | 88613973 | 88614303 |
| chr11 | 88614385 | 88614558 |
| chr11 | 88614741 | 88614969 |
| chr11 | 88614969 | 88615318 |
| chr11 | 88618748 | 88619044 |
| chr11 | 88619044 | 88619334 |
| chr11 | 88628939 | 88629821 |
| chr11 | 88634640 | 88635164 |
| chr11 | 88636386 | 88636780 |
| chr11 | 88637904 | 88638251 |
| chr11 | 88638251 | 88638653 |
| chr11 | 88683011 | 88683231 |
| chr11 | 88683336 | 88683748 |
| chr11 | 88687084 | 88687356 |
| chr11 | 88691092 | 88691315 |
| chr11 | 88691807 | 88692004 |
| chr11 | 88692440 | 88692795 |
| chr11 | 88693389 | 88693678 |
| chr11 | 88717736 | 88718113 |
| chr11 | 88718113 | 88718448 |
| chr11 | 88718448 | 88718820 |
| chr11 | 88718820 | 88719102 |
| chr11 | 88728645 | 88728799 |
| chr11 | 88758471 | 88758621 |
| chr11 | 88773927 | 88774309 |
| chr11 | 88782525 | 88782890 |
| chr11 | 88796274 | 88796618 |
| chr11 | 88797623 | 88797778 |
| chr11 | 88817113 | 88817367 |
| chr11 | 88817367 | 88817857 |
| chr11 | 88817949 | 88818215 |
| chr11 | 88822620 | 88822858 |

|       |          |          |
|-------|----------|----------|
| chr11 | 88822858 | 88823090 |
| chr11 | 88823090 | 88823367 |
| chr11 | 88830486 | 88830741 |
| chr11 | 88833008 | 88833470 |
| chr11 | 88841461 | 88841698 |
| chr11 | 88848662 | 88849087 |
| chr11 | 88849853 | 88850123 |
| chr11 | 88851377 | 88851706 |
| chr11 | 88856433 | 88856688 |
| chr11 | 88863865 | 88864345 |
| chr11 | 88864345 | 88864648 |
| chr11 | 88864648 | 88864875 |
| chr11 | 88864875 | 88865104 |
| chr11 | 88873101 | 88873294 |
| chr11 | 88873344 | 88873494 |
| chr11 | 88881136 | 88881593 |
| chr11 | 88888500 | 88888689 |
| chr11 | 88888936 | 88889326 |
| chr11 | 88890533 | 88890828 |
| chr11 | 88896616 | 88896955 |
| chr11 | 88902667 | 88903101 |
| chr11 | 88908322 | 88908787 |
| chr11 | 88908787 | 88908998 |
| chr11 | 88918285 | 88918435 |
| chr11 | 88920047 | 88920206 |
| chr11 | 88937921 | 88938270 |
| chr11 | 88939693 | 88939929 |
| chr11 | 88944471 | 88944621 |
| chr11 | 88952235 | 88952438 |
| chr11 | 88954183 | 88954333 |
| chr11 | 88954864 | 88955145 |
| chr11 | 88955230 | 88955721 |
| chr11 | 88967781 | 88968155 |
| chr11 | 88968216 | 88968467 |
| chr11 | 88968467 | 88968748 |
| chr11 | 88968748 | 88968982 |
| chr11 | 88968990 | 88969266 |
| chr11 | 88970174 | 88970374 |
| chr11 | 88970374 | 88970588 |
| chr11 | 88973733 | 88974045 |
| chr11 | 88974045 | 88974358 |
| chr11 | 88974358 | 88974769 |

|       |          |          |
|-------|----------|----------|
| chr11 | 88989600 | 88989869 |
| chr11 | 88989869 | 88990128 |
| chr11 | 88993618 | 88994032 |
| chr11 | 88996376 | 88996738 |
| chr11 | 88999062 | 88999599 |
| chr11 | 88999599 | 88999969 |
| chr11 | 88999969 | 89000310 |
| chr11 | 89000521 | 89000688 |
| chr11 | 89017726 | 89018036 |
| chr11 | 89023241 | 89023899 |
| chr11 | 89024074 | 89024882 |
| chr11 | 89031228 | 89031552 |
| chr11 | 89031578 | 89031730 |
| chr11 | 89038397 | 89038949 |
| chr11 | 89038949 | 89039184 |
| chr11 | 89039375 | 89039636 |
| chr11 | 89058612 | 89058841 |
| chr11 | 89059009 | 89059213 |
| chr11 | 89059887 | 89060156 |
| chr11 | 89060156 | 89060517 |
| chr11 | 89060517 | 89061137 |
| chr11 | 89069457 | 89069643 |
| chr11 | 89072453 | 89072607 |
| chr11 | 89081624 | 89082151 |
| chr11 | 89084742 | 89084910 |
| chr11 | 89094966 | 89095285 |
| chr11 | 89095543 | 89095762 |
| chr11 | 89100368 | 89100820 |
| chr11 | 89100886 | 89101056 |
| chr11 | 89127634 | 89127784 |
| chr11 | 89134244 | 89134485 |
| chr11 | 89165323 | 89165613 |
| chr11 | 89168947 | 89169229 |
| chr11 | 89175579 | 89175855 |
| chr11 | 89175855 | 89176161 |
| chr11 | 89185908 | 89186319 |
| chr11 | 89186871 | 89187275 |
| chr11 | 89187275 | 89187832 |
| chr11 | 89203520 | 89203685 |
| chr11 | 89206456 | 89206757 |
| chr11 | 89206757 | 89207050 |
| chr11 | 89207050 | 89207321 |

|       |          |          |
|-------|----------|----------|
| chr11 | 89208212 | 89208507 |
| chr11 | 89226842 | 89227091 |
| chr11 | 89229942 | 89230108 |
| chr11 | 89235519 | 89236057 |
| chr11 | 89236232 | 89236445 |
| chr11 | 89239847 | 89240212 |
| chr11 | 89243424 | 89243586 |
| chr11 | 89245927 | 89246134 |
| chr11 | 89248695 | 89248906 |
| chr11 | 89249041 | 89249201 |
| chr11 | 89265188 | 89265374 |
| chr11 | 89297515 | 89297850 |
| chr11 | 89298249 | 89298534 |
| chr11 | 89299293 | 89299488 |
| chr11 | 89299499 | 89299678 |
| chr11 | 89301345 | 89301546 |
| chr11 | 89301586 | 89301751 |
| chr11 | 89301819 | 89302021 |
| chr11 | 89302021 | 89302311 |
| chr11 | 89302311 | 89302630 |
| chr11 | 89302658 | 89302909 |
| chr11 | 89302909 | 89303266 |
| chr11 | 89303326 | 89303764 |
| chr11 | 89356588 | 89356745 |
| chr11 | 89539807 | 89540091 |
| chr11 | 89546266 | 89546521 |
| chr11 | 89579410 | 89579635 |
| chr11 | 89579810 | 89580309 |
| chr11 | 89592486 | 89592689 |
| chr11 | 89601246 | 89601457 |
| chr11 | 89602428 | 89602578 |
| chr11 | 89616641 | 89616882 |
| chr11 | 89620658 | 89620939 |
| chr11 | 89627316 | 89627560 |
| chr11 | 89631260 | 89631786 |
| chr11 | 89720986 | 89721151 |
| chr11 | 89969688 | 89969858 |
| chr11 | 89970785 | 89971149 |
| chr11 | 89971280 | 89971653 |
| chr11 | 89985307 | 89985520 |
| chr11 | 89985520 | 89985756 |
| chr11 | 89988953 | 89989208 |



|       |          |          |
|-------|----------|----------|
| chr11 | 89996849 | 89997138 |
| chr11 | 89997446 | 89997708 |
| chr11 | 90002504 | 90002764 |
| chr11 | 90002764 | 90003057 |
| chr11 | 90003057 | 90003244 |
| chr11 | 90035587 | 90035908 |
| chr11 | 90170061 | 90170312 |
| chr11 | 90172431 | 90172666 |
| chr11 | 90196284 | 90196519 |
| chr11 | 90196519 | 90197094 |
| chr11 | 90220379 | 90220547 |
| chr11 | 90224151 | 90224363 |
| chr11 | 90224756 | 90225194 |
| chr11 | 90225194 | 90225464 |
| chr11 | 90225761 | 90226125 |
| chr11 | 90228328 | 90228905 |
| chr11 | 90249087 | 90250111 |
| chr11 | 90254298 | 90254519 |
| chr11 | 90270593 | 90270835 |
| chr11 | 90307027 | 90307307 |
| chr11 | 90352590 | 90352950 |
| chr11 | 90352950 | 90353258 |
| chr11 | 90355155 | 90355574 |
| chr11 | 90355574 | 90355863 |
| chr11 | 90371567 | 90371797 |
| chr11 | 90389561 | 90389793 |
| chr11 | 90389849 | 90390115 |
| chr11 | 90390172 | 90390378 |
| chr11 | 90390560 | 90390779 |
| chr11 | 90390779 | 90391150 |
| chr11 | 90417767 | 90418330 |
| chr11 | 90442329 | 90442545 |
| chr11 | 90456537 | 90456822 |
| chr11 | 90475412 | 90475680 |
| chr11 | 90502036 | 90502194 |
| chr11 | 90521122 | 90521300 |
| chr11 | 90525366 | 90525661 |
| chr11 | 90525661 | 90525956 |
| chr11 | 90558216 | 90558702 |
| chr11 | 90558702 | 90558947 |
| chr11 | 90559466 | 90559818 |
| chr11 | 90563117 | 90563422 |

|       |          |          |
|-------|----------|----------|
| chr11 | 90570698 | 90570848 |
| chr11 | 90570918 | 90571211 |
| chr11 | 90576182 | 90576431 |
| chr11 | 90576431 | 90576678 |
| chr11 | 90576678 | 90576982 |
| chr11 | 90577425 | 90577672 |
| chr11 | 90599456 | 90599699 |
| chr11 | 90623636 | 90623793 |
| chr11 | 90637519 | 90637975 |
| chr11 | 90637975 | 90638444 |
| chr11 | 90638444 | 90638967 |
| chr11 | 90649794 | 90649965 |
| chr11 | 90650226 | 90650499 |
| chr11 | 90650499 | 90650903 |
| chr11 | 90651788 | 90652040 |
| chr11 | 90654552 | 90654749 |
| chr11 | 90678116 | 90678603 |
| chr11 | 90678603 | 90679031 |
| chr11 | 90679111 | 90679336 |
| chr11 | 90686711 | 90687051 |
| chr11 | 90687150 | 90687468 |
| chr11 | 90687468 | 90687884 |
| chr11 | 90687884 | 90688145 |
| chr11 | 90697365 | 90697838 |
| chr11 | 90697838 | 90698248 |
| chr11 | 90732612 | 90732801 |
| chr11 | 90814565 | 90814817 |
| chr11 | 90816797 | 90817018 |
| chr11 | 90833592 | 90833763 |
| chr11 | 90950419 | 90950576 |
| chr11 | 90951580 | 90951826 |
| chr11 | 91065359 | 91065749 |
| chr11 | 91071828 | 91072003 |
| chr11 | 91121413 | 91121570 |
| chr11 | 91692089 | 91692241 |
| chr11 | 92018534 | 92018729 |
| chr11 | 92334829 | 92335075 |
| chr11 | 92335185 | 92335598 |
| chr11 | 92405918 | 92406070 |
| chr11 | 92406891 | 92407080 |
| chr11 | 92489603 | 92490014 |
| chr11 | 92495336 | 92495602 |

|       |          |          |
|-------|----------|----------|
| chr11 | 92518386 | 92518571 |
| chr11 | 92551499 | 92551819 |
| chr11 | 92552845 | 92553037 |
| chr11 | 92592686 | 92593185 |
| chr11 | 92593185 | 92593380 |
| chr11 | 92716475 | 92716671 |
| chr11 | 92774904 | 92775092 |
| chr11 | 92797484 | 92797665 |
| chr11 | 92890081 | 92890420 |
| chr11 | 92959575 | 92959725 |
| chr11 | 93099003 | 93099223 |
| chr11 | 93099545 | 93099743 |
| chr11 | 93109495 | 93109976 |
| chr11 | 93126511 | 93126758 |
| chr11 | 93158955 | 93159175 |
| chr11 | 93217248 | 93217542 |
| chr11 | 93217542 | 93217884 |
| chr11 | 93263515 | 93263953 |
| chr11 | 93264014 | 93264283 |
| chr11 | 93273982 | 93274241 |
| chr11 | 93277675 | 93277829 |
| chr11 | 93471923 | 93472160 |
| chr11 | 93569194 | 93569406 |
| chr11 | 93668181 | 93668513 |
| chr11 | 93763148 | 93763353 |
| chr11 | 93768797 | 93769030 |
| chr11 | 93785797 | 93786046 |
| chr11 | 93812545 | 93812826 |
| chr11 | 93817251 | 93817406 |
| chr11 | 93821267 | 93821437 |
| chr11 | 93821440 | 93821831 |
| chr11 | 93856370 | 93856643 |
| chr11 | 93856645 | 93856824 |
| chr11 | 93873743 | 93873930 |
| chr11 | 93884860 | 93885345 |
| chr11 | 93885345 | 93885610 |
| chr11 | 93885610 | 93885940 |
| chr11 | 93885940 | 93886283 |
| chr11 | 93886306 | 93886460 |
| chr11 | 93886812 | 93886966 |
| chr11 | 93898318 | 93898532 |
| chr11 | 93903440 | 93903966 |

|       |          |          |
|-------|----------|----------|
| chr11 | 93908833 | 93909310 |
| chr11 | 93927903 | 93928091 |
| chr11 | 93929200 | 93929351 |
| chr11 | 93940590 | 93940766 |
| chr11 | 93940766 | 93940986 |
| chr11 | 93940986 | 93941297 |
| chr11 | 93945031 | 93945284 |
| chr11 | 93948716 | 93948918 |
| chr11 | 93949132 | 93949534 |
| chr11 | 93954906 | 93955116 |
| chr11 | 93955116 | 93955464 |
| chr11 | 93955464 | 93955837 |
| chr11 | 93955837 | 93956174 |
| chr11 | 93956205 | 93956376 |
| chr11 | 93956376 | 93956540 |
| chr11 | 93963026 | 93963386 |
| chr11 | 93967579 | 93967742 |
| chr11 | 93967922 | 93968171 |
| chr11 | 93968171 | 93968373 |
| chr11 | 93968373 | 93968730 |
| chr11 | 93987326 | 93987485 |
| chr11 | 93987491 | 93988043 |
| chr11 | 93988043 | 93988438 |
| chr11 | 93988517 | 93988785 |
| chr11 | 93988785 | 93988998 |
| chr11 | 93995023 | 93995523 |
| chr11 | 93995670 | 93995999 |
| chr11 | 93995999 | 93996317 |
| chr11 | 93996317 | 93996622 |
| chr11 | 93996665 | 93996971 |
| chr11 | 94004802 | 94004977 |
| chr11 | 94014305 | 94014546 |
| chr11 | 94014546 | 94014787 |
| chr11 | 94014787 | 94014995 |
| chr11 | 94026319 | 94026641 |
| chr11 | 94032845 | 94033042 |
| chr11 | 94033042 | 94033559 |
| chr11 | 94073379 | 94073639 |
| chr11 | 94087026 | 94087320 |
| chr11 | 94109605 | 94109869 |
| chr11 | 94109869 | 94110145 |
| chr11 | 94120943 | 94121158 |

|       |          |          |
|-------|----------|----------|
| chr11 | 94121158 | 94121621 |
| chr11 | 94121623 | 94121778 |
| chr11 | 94121931 | 94122134 |
| chr11 | 94126880 | 94127045 |
| chr11 | 94127968 | 94128299 |
| chr11 | 94129699 | 94129957 |
| chr11 | 94133288 | 94133662 |
| chr11 | 94133662 | 94134007 |
| chr11 | 94141528 | 94141959 |
| chr11 | 94143464 | 94143683 |
| chr11 | 94145162 | 94145587 |
| chr11 | 94150851 | 94151001 |
| chr11 | 94151010 | 94151245 |
| chr11 | 94151427 | 94151725 |
| chr11 | 94152622 | 94152808 |
| chr11 | 94160310 | 94160735 |
| chr11 | 94160735 | 94161059 |
| chr11 | 94161135 | 94161736 |
| chr11 | 94169808 | 94170120 |
| chr11 | 94170968 | 94171331 |
| chr11 | 94171331 | 94171538 |
| chr11 | 94172210 | 94172563 |
| chr11 | 94175294 | 94175561 |
| chr11 | 94175796 | 94175955 |
| chr11 | 94189347 | 94189573 |
| chr11 | 94189573 | 94190015 |
| chr11 | 94192634 | 94192795 |
| chr11 | 94193090 | 94193392 |
| chr11 | 94209983 | 94210576 |
| chr11 | 94210620 | 94210996 |
| chr11 | 94210996 | 94211350 |
| chr11 | 94211350 | 94211629 |
| chr11 | 94211629 | 94211886 |
| chr11 | 94211886 | 94212124 |
| chr11 | 94226041 | 94226373 |
| chr11 | 94227669 | 94228158 |
| chr11 | 94231569 | 94231807 |
| chr11 | 94231807 | 94232136 |
| chr11 | 94232227 | 94232549 |
| chr11 | 94236075 | 94236375 |
| chr11 | 94240663 | 94240985 |
| chr11 | 94241039 | 94241423 |

|       |          |          |
|-------|----------|----------|
| chr11 | 94253551 | 94253802 |
| chr11 | 94253802 | 94254174 |
| chr11 | 94259164 | 94259449 |
| chr11 | 94259920 | 94260100 |
| chr11 | 94260484 | 94260644 |
| chr11 | 94265341 | 94265553 |
| chr11 | 94265553 | 94265723 |
| chr11 | 94266304 | 94266545 |
| chr11 | 94268900 | 94269076 |
| chr11 | 94274418 | 94274619 |
| chr11 | 94274619 | 94274970 |
| chr11 | 94275236 | 94275613 |
| chr11 | 94275666 | 94276175 |
| chr11 | 94277028 | 94277329 |
| chr11 | 94282341 | 94282702 |
| chr11 | 94284073 | 94284223 |
| chr11 | 94286258 | 94286469 |
| chr11 | 94287258 | 94287520 |
| chr11 | 94311078 | 94311271 |
| chr11 | 94315385 | 94315642 |
| chr11 | 94321099 | 94321279 |
| chr11 | 94321396 | 94321849 |
| chr11 | 94321849 | 94322425 |
| chr11 | 94327190 | 94327388 |
| chr11 | 94327743 | 94328180 |
| chr11 | 94328180 | 94328721 |
| chr11 | 94329605 | 94329857 |
| chr11 | 94334649 | 94334915 |
| chr11 | 94336593 | 94336926 |
| chr11 | 94337712 | 94337953 |
| chr11 | 94340264 | 94340560 |
| chr11 | 94340987 | 94341299 |
| chr11 | 94341402 | 94341636 |
| chr11 | 94341636 | 94341882 |
| chr11 | 94346427 | 94346670 |
| chr11 | 94346670 | 94347172 |
| chr11 | 94352064 | 94352310 |
| chr11 | 94352310 | 94352571 |
| chr11 | 94352647 | 94353087 |
| chr11 | 94355346 | 94355549 |
| chr11 | 94355937 | 94356117 |
| chr11 | 94356386 | 94356556 |

|       |          |          |
|-------|----------|----------|
| chr11 | 94365117 | 94365806 |
| chr11 | 94370019 | 94370380 |
| chr11 | 94370469 | 94371294 |
| chr11 | 94386027 | 94386178 |
| chr11 | 94386443 | 94386735 |
| chr11 | 94386763 | 94386913 |
| chr11 | 94387920 | 94388216 |
| chr11 | 94390964 | 94391160 |
| chr11 | 94391710 | 94391984 |
| chr11 | 94392256 | 94392443 |
| chr11 | 94392560 | 94392869 |
| chr11 | 94392869 | 94393135 |
| chr11 | 94401142 | 94401321 |
| chr11 | 94403781 | 94404141 |
| chr11 | 94404141 | 94404524 |
| chr11 | 94404524 | 94404779 |
| chr11 | 94404779 | 94405037 |
| chr11 | 94410765 | 94411126 |
| chr11 | 94412998 | 94413248 |
| chr11 | 94414129 | 94414350 |
| chr11 | 94416028 | 94416270 |
| chr11 | 94420233 | 94420588 |
| chr11 | 94428593 | 94428757 |
| chr11 | 94429108 | 94429261 |
| chr11 | 94429699 | 94429863 |
| chr11 | 94432320 | 94432497 |
| chr11 | 94433878 | 94434056 |
| chr11 | 94438116 | 94438357 |
| chr11 | 94441196 | 94441405 |
| chr11 | 94445201 | 94445712 |
| chr11 | 94455470 | 94455733 |
| chr11 | 94456181 | 94456368 |
| chr11 | 94456424 | 94456587 |
| chr11 | 94463239 | 94463389 |
| chr11 | 94466097 | 94466279 |
| chr11 | 94468134 | 94468568 |
| chr11 | 94468568 | 94468859 |
| chr11 | 94468859 | 94469118 |
| chr11 | 94473775 | 94473935 |
| chr11 | 94474070 | 94474750 |
| chr11 | 94483590 | 94483751 |
| chr11 | 94486050 | 94486280 |

|       |          |          |
|-------|----------|----------|
| chr11 | 94488808 | 94489138 |
| chr11 | 94489138 | 94489583 |
| chr11 | 94489594 | 94489840 |
| chr11 | 94489840 | 94490113 |
| chr11 | 94495919 | 94496070 |
| chr11 | 94498106 | 94498525 |
| chr11 | 94498531 | 94498796 |
| chr11 | 94499216 | 94499392 |
| chr11 | 94499591 | 94499824 |
| chr11 | 94499824 | 94500180 |
| chr11 | 94508268 | 94508534 |
| chr11 | 94508534 | 94508877 |
| chr11 | 94508877 | 94509495 |
| chr11 | 94513926 | 94514189 |
| chr11 | 94521172 | 94521439 |
| chr11 | 94521439 | 94521660 |
| chr11 | 94521660 | 94521905 |
| chr11 | 94526613 | 94526802 |
| chr11 | 94531969 | 94532533 |
| chr11 | 94532586 | 94532806 |
| chr11 | 94538136 | 94538435 |
| chr11 | 94538683 | 94539231 |
| chr11 | 94539265 | 94539608 |
| chr11 | 94543818 | 94544281 |
| chr11 | 94546545 | 94546802 |
| chr11 | 94547994 | 94548305 |
| chr11 | 94548399 | 94548720 |
| chr11 | 94548822 | 94549599 |
| chr11 | 94555263 | 94555581 |
| chr11 | 94563793 | 94564131 |
| chr11 | 94565244 | 94565481 |
| chr11 | 94597372 | 94597542 |
| chr11 | 94601385 | 94601728 |
| chr11 | 94601728 | 94602052 |
| chr11 | 94602052 | 94602395 |
| chr11 | 94602395 | 94602744 |
| chr11 | 94614458 | 94614688 |
| chr11 | 94614688 | 94614929 |
| chr11 | 94621570 | 94621772 |
| chr11 | 94629544 | 94629887 |
| chr11 | 94629887 | 94630124 |
| chr11 | 94630124 | 94630337 |



|       |          |          |
|-------|----------|----------|
| chr11 | 94630348 | 94630565 |
| chr11 | 94630565 | 94630769 |
| chr11 | 94636915 | 94637220 |
| chr11 | 94644849 | 94644996 |
| chr11 | 94644996 | 94645162 |
| chr11 | 94645269 | 94645583 |
| chr11 | 94645583 | 94645983 |
| chr11 | 94646522 | 94646707 |
| chr11 | 94648166 | 94648323 |
| chr11 | 94653467 | 94653880 |
| chr11 | 94653880 | 94654122 |
| chr11 | 94654122 | 94654377 |
| chr11 | 94661013 | 94661164 |
| chr11 | 94662832 | 94662982 |
| chr11 | 94676653 | 94676981 |
| chr11 | 94676981 | 94677348 |
| chr11 | 94677348 | 94677624 |
| chr11 | 94677624 | 94677813 |
| chr11 | 94700587 | 94700846 |
| chr11 | 94703420 | 94703572 |
| chr11 | 94718141 | 94718291 |
| chr11 | 94718596 | 94719039 |
| chr11 | 94719253 | 94719596 |
| chr11 | 94729717 | 94729872 |
| chr11 | 94730322 | 94730571 |
| chr11 | 94732843 | 94733105 |
| chr11 | 94737661 | 94737846 |
| chr11 | 94738557 | 94738708 |
| chr11 | 94742001 | 94742158 |
| chr11 | 94750152 | 94750313 |
| chr11 | 94750325 | 94750492 |
| chr11 | 94750667 | 94750863 |
| chr11 | 94753386 | 94753609 |
| chr11 | 94761417 | 94761684 |
| chr11 | 94762862 | 94763099 |
| chr11 | 94785283 | 94785643 |
| chr11 | 94785805 | 94785945 |
| chr11 | 94785945 | 94786043 |
| chr11 | 94786102 | 94786471 |
| chr11 | 94786471 | 94786859 |
| chr11 | 94803553 | 94803810 |
| chr11 | 94819050 | 94819327 |

|       |          |          |
|-------|----------|----------|
| chr11 | 94819506 | 94819727 |
| chr11 | 94832644 | 94832882 |
| chr11 | 94832882 | 94833076 |
| chr11 | 94838212 | 94838378 |
| chr11 | 94839270 | 94839450 |
| chr11 | 94865528 | 94865745 |
| chr11 | 94866599 | 94867004 |
| chr11 | 94869712 | 94869879 |
| chr11 | 94869922 | 94870307 |
| chr11 | 94870307 | 94870677 |
| chr11 | 94874164 | 94874316 |
| chr11 | 94880773 | 94881095 |
| chr11 | 94885598 | 94885751 |
| chr11 | 94911025 | 94911243 |
| chr11 | 94913781 | 94914018 |
| chr11 | 94915738 | 94916022 |
| chr11 | 94916311 | 94916474 |
| chr11 | 94916492 | 94916910 |
| chr11 | 94917845 | 94918057 |
| chr11 | 94927559 | 94927967 |
| chr11 | 94927967 | 94928415 |
| chr11 | 94928729 | 94929216 |
| chr11 | 94936701 | 94937043 |
| chr11 | 94937043 | 94937323 |
| chr11 | 94937323 | 94937620 |
| chr11 | 94937652 | 94937939 |
| chr11 | 94937939 | 94938127 |
| chr11 | 94939381 | 94939580 |
| chr11 | 94942368 | 94942623 |
| chr11 | 94945803 | 94946145 |
| chr11 | 94952312 | 94952503 |
| chr11 | 94957925 | 94958263 |
| chr11 | 94958263 | 94958793 |
| chr11 | 94960793 | 94961057 |
| chr11 | 94967498 | 94967658 |
| chr11 | 94969760 | 94969935 |
| chr11 | 94970213 | 94970602 |
| chr11 | 94970649 | 94970882 |
| chr11 | 94972182 | 94972520 |
| chr11 | 94978914 | 94979343 |
| chr11 | 94982936 | 94983171 |
| chr11 | 94989757 | 94990045 |

|       |          |          |
|-------|----------|----------|
| chr11 | 94990770 | 94991065 |
| chr11 | 94991065 | 94991310 |
| chr11 | 94991689 | 94992251 |
| chr11 | 94992492 | 94992717 |
| chr11 | 94992881 | 94993376 |
| chr11 | 94997707 | 94998062 |
| chr11 | 95000686 | 95000884 |
| chr11 | 95001061 | 95001416 |
| chr11 | 95006611 | 95006857 |
| chr11 | 95007610 | 95007768 |
| chr11 | 95009432 | 95010082 |
| chr11 | 95010216 | 95010447 |
| chr11 | 95025454 | 95025654 |
| chr11 | 95026102 | 95026551 |
| chr11 | 95035031 | 95035191 |
| chr11 | 95041127 | 95041776 |
| chr11 | 95042202 | 95042494 |
| chr11 | 95046998 | 95047365 |
| chr11 | 95052307 | 95052621 |
| chr11 | 95060356 | 95060643 |
| chr11 | 95060643 | 95060828 |
| chr11 | 95060828 | 95060974 |
| chr11 | 95060980 | 95061315 |
| chr11 | 95066087 | 95066300 |
| chr11 | 95070204 | 95070574 |
| chr11 | 95072874 | 95073262 |
| chr11 | 95075485 | 95075700 |
| chr11 | 95076023 | 95076242 |
| chr11 | 95076310 | 95076576 |
| chr11 | 95076576 | 95077122 |
| chr11 | 95077930 | 95078467 |
| chr11 | 95079571 | 95079889 |
| chr11 | 95085569 | 95085827 |
| chr11 | 95085827 | 95086178 |
| chr11 | 95086178 | 95086703 |
| chr11 | 95087327 | 95087609 |
| chr11 | 95087609 | 95087971 |
| chr11 | 95088876 | 95089171 |
| chr11 | 95089497 | 95089789 |
| chr11 | 95092983 | 95093199 |
| chr11 | 95093199 | 95093494 |
| chr11 | 95096585 | 95097007 |

|       |          |          |
|-------|----------|----------|
| chr11 | 95097007 | 95097409 |
| chr11 | 95098631 | 95098881 |
| chr11 | 95099603 | 95099946 |
| chr11 | 95105239 | 95105627 |
| chr11 | 95105627 | 95105944 |
| chr11 | 95105944 | 95106242 |
| chr11 | 95106695 | 95106943 |
| chr11 | 95106943 | 95107221 |
| chr11 | 95109018 | 95109452 |
| chr11 | 95117024 | 95117525 |
| chr11 | 95118587 | 95118837 |
| chr11 | 95120003 | 95120290 |
| chr11 | 95120290 | 95120594 |
| chr11 | 95125426 | 95125707 |
| chr11 | 95125707 | 95126009 |
| chr11 | 95126291 | 95126480 |
| chr11 | 95126483 | 95126957 |
| chr11 | 95130727 | 95130994 |
| chr11 | 95137339 | 95137508 |
| chr11 | 95145297 | 95145583 |
| chr11 | 95145769 | 95146532 |
| chr11 | 95153168 | 95153568 |
| chr11 | 95153802 | 95153971 |
| chr11 | 95157523 | 95157821 |
| chr11 | 95157839 | 95158405 |
| chr11 | 95159704 | 95160262 |
| chr11 | 95160262 | 95160664 |
| chr11 | 95165896 | 95166252 |
| chr11 | 95184684 | 95185050 |
| chr11 | 95185789 | 95186017 |
| chr11 | 95186850 | 95187141 |
| chr11 | 95196960 | 95197131 |
| chr11 | 95206199 | 95206634 |
| chr11 | 95210278 | 95210429 |
| chr11 | 95210761 | 95211094 |
| chr11 | 95213635 | 95213832 |
| chr11 | 95219266 | 95219520 |
| chr11 | 95224227 | 95224447 |
| chr11 | 95224564 | 95224824 |
| chr11 | 95225168 | 95225421 |
| chr11 | 95225427 | 95225845 |
| chr11 | 95231860 | 95232339 |

|       |          |          |
|-------|----------|----------|
| chr11 | 95232443 | 95232752 |
| chr11 | 95241299 | 95241654 |
| chr11 | 95245531 | 95245939 |
| chr11 | 95251353 | 95251645 |
| chr11 | 95251883 | 95252064 |
| chr11 | 95252064 | 95252309 |
| chr11 | 95258514 | 95258904 |
| chr11 | 95259065 | 95259407 |
| chr11 | 95259407 | 95259874 |
| chr11 | 95261306 | 95261456 |
| chr11 | 95266337 | 95266497 |
| chr11 | 95266935 | 95267153 |
| chr11 | 95267980 | 95268148 |
| chr11 | 95273730 | 95274002 |
| chr11 | 95274705 | 95274893 |
| chr11 | 95279136 | 95279333 |
| chr11 | 95298221 | 95298641 |
| chr11 | 95300020 | 95300249 |
| chr11 | 95309475 | 95310039 |
| chr11 | 95310063 | 95310597 |
| chr11 | 95318629 | 95318779 |
| chr11 | 95318861 | 95319125 |
| chr11 | 95319577 | 95319775 |
| chr11 | 95325813 | 95325963 |
| chr11 | 95326323 | 95326474 |
| chr11 | 95330571 | 95331023 |
| chr11 | 95336553 | 95336824 |
| chr11 | 95336824 | 95337084 |
| chr11 | 95337084 | 95337315 |
| chr11 | 95337315 | 95337509 |
| chr11 | 95337509 | 95337728 |
| chr11 | 95356792 | 95356979 |
| chr11 | 95358345 | 95358561 |
| chr11 | 95366564 | 95366849 |
| chr11 | 95375996 | 95376162 |
| chr11 | 95383344 | 95383525 |
| chr11 | 95384131 | 95384505 |
| chr11 | 95384505 | 95384736 |
| chr11 | 95384775 | 95385017 |
| chr11 | 95385017 | 95385229 |
| chr11 | 95397339 | 95397506 |
| chr11 | 95397506 | 95397691 |

|       |          |          |
|-------|----------|----------|
| chr11 | 95397907 | 95398143 |
| chr11 | 95400875 | 95401047 |
| chr11 | 95402887 | 95403125 |
| chr11 | 95403517 | 95403853 |
| chr11 | 95403853 | 95404338 |
| chr11 | 95413738 | 95414240 |
| chr11 | 95414240 | 95414604 |
| chr11 | 95414604 | 95415065 |
| chr11 | 95415831 | 95416056 |
| chr11 | 95416134 | 95416363 |
| chr11 | 95430466 | 95430795 |
| chr11 | 95430835 | 95430989 |
| chr11 | 95432273 | 95432439 |
| chr11 | 95432743 | 95433071 |
| chr11 | 95499364 | 95499589 |
| chr11 | 95499589 | 95499931 |
| chr11 | 95507044 | 95507562 |
| chr11 | 95507562 | 95507886 |
| chr11 | 95514047 | 95514986 |
| chr11 | 95520723 | 95521078 |
| chr11 | 95521303 | 95521571 |
| chr11 | 95521571 | 95521936 |
| chr11 | 95533598 | 95533792 |
| chr11 | 95533799 | 95534230 |
| chr11 | 95540740 | 95541023 |
| chr11 | 95541069 | 95541219 |
| chr11 | 95546041 | 95546333 |
| chr11 | 95550388 | 95550675 |
| chr11 | 95550675 | 95550885 |
| chr11 | 95557309 | 95557600 |
| chr11 | 95560784 | 95561110 |
| chr11 | 95564714 | 95565167 |
| chr11 | 95570834 | 95571121 |
| chr11 | 95575615 | 95576271 |
| chr11 | 95577810 | 95578110 |
| chr11 | 95578110 | 95578404 |
| chr11 | 95585142 | 95585401 |
| chr11 | 95586182 | 95586551 |
| chr11 | 95587515 | 95587978 |
| chr11 | 95630438 | 95630721 |
| chr11 | 95632517 | 95632695 |
| chr11 | 95644235 | 95644800 |

|       |          |          |
|-------|----------|----------|
| chr11 | 95645616 | 95645848 |
| chr11 | 95648903 | 95649161 |
| chr11 | 95650152 | 95650369 |
| chr11 | 95651043 | 95651489 |
| chr11 | 95666555 | 95667129 |
| chr11 | 95667129 | 95667539 |
| chr11 | 95668181 | 95668392 |
| chr11 | 95675238 | 95675465 |
| chr11 | 95676382 | 95676612 |
| chr11 | 95686011 | 95686374 |
| chr11 | 95689584 | 95689747 |
| chr11 | 95702706 | 95703037 |
| chr11 | 95712099 | 95712337 |
| chr11 | 95712512 | 95712857 |
| chr11 | 95712857 | 95713186 |
| chr11 | 95713186 | 95713500 |
| chr11 | 95713500 | 95713807 |
| chr11 | 95713965 | 95714123 |
| chr11 | 95744544 | 95744721 |
| chr11 | 95751062 | 95751303 |
| chr11 | 95759951 | 95760160 |
| chr11 | 95760160 | 95760439 |
| chr11 | 95760439 | 95760714 |
| chr11 | 95770781 | 95770987 |
| chr11 | 95777338 | 95777596 |
| chr11 | 95777596 | 95777861 |
| chr11 | 95777861 | 95778267 |
| chr11 | 95779376 | 95779721 |
| chr11 | 95799017 | 95799238 |
| chr11 | 95799238 | 95799446 |
| chr11 | 95799446 | 95799727 |
| chr11 | 95800365 | 95800969 |
| chr11 | 95805703 | 95805952 |
| chr11 | 95808426 | 95808588 |
| chr11 | 95809471 | 95809695 |
| chr11 | 95810465 | 95810679 |
| chr11 | 95823958 | 95824622 |
| chr11 | 95827530 | 95827731 |
| chr11 | 95828016 | 95828255 |
| chr11 | 95834200 | 95834356 |
| chr11 | 95836531 | 95836865 |
| chr11 | 95836917 | 95837438 |

|       |          |          |
|-------|----------|----------|
| chr11 | 95853798 | 95854058 |
| chr11 | 95858319 | 95858479 |
| chr11 | 95858537 | 95859036 |
| chr11 | 95859036 | 95859413 |
| chr11 | 95859456 | 95859860 |
| chr11 | 95859960 | 95860147 |
| chr11 | 95860147 | 95860381 |
| chr11 | 95875949 | 95876101 |
| chr11 | 95876366 | 95876612 |
| chr11 | 95890546 | 95890697 |
| chr11 | 95914235 | 95914503 |
| chr11 | 95914567 | 95915088 |
| chr11 | 95915376 | 95915546 |
| chr11 | 95915930 | 95916090 |
| chr11 | 95926564 | 95926715 |
| chr11 | 95940235 | 95940403 |
| chr11 | 95948548 | 95948806 |
| chr11 | 95952948 | 95953520 |
| chr11 | 95959277 | 95959505 |
| chr11 | 95964422 | 95964616 |
| chr11 | 95975861 | 95976011 |
| chr11 | 95976429 | 95976597 |
| chr11 | 95981088 | 95981440 |
| chr11 | 95981440 | 95981658 |
| chr11 | 95981810 | 95982027 |
| chr11 | 95982027 | 95982252 |
| chr11 | 95982310 | 95982472 |
| chr11 | 95982510 | 95982816 |
| chr11 | 95982816 | 95983081 |
| chr11 | 95988239 | 95988595 |
| chr11 | 95988595 | 95989186 |
| chr11 | 95994777 | 95994927 |
| chr11 | 96004709 | 96005035 |
| chr11 | 96005035 | 96005367 |
| chr11 | 96005367 | 96005594 |
| chr11 | 96005594 | 96005804 |
| chr11 | 96005804 | 96006031 |
| chr11 | 96006517 | 96006820 |
| chr11 | 96006836 | 96007130 |
| chr11 | 96007130 | 96007460 |
| chr11 | 96007460 | 96007743 |
| chr11 | 96017773 | 96018610 |



|       |          |          |
|-------|----------|----------|
| chr11 | 96021323 | 96021510 |
| chr11 | 96028457 | 96028620 |
| chr11 | 96028701 | 96029299 |
| chr11 | 96031805 | 96031966 |
| chr11 | 96034182 | 96034388 |
| chr11 | 96034607 | 96035021 |
| chr11 | 96035021 | 96035250 |
| chr11 | 96035250 | 96035448 |
| chr11 | 96045206 | 96045391 |
| chr11 | 96045391 | 96045512 |
| chr11 | 96058369 | 96058531 |
| chr11 | 96064453 | 96064870 |
| chr11 | 96064870 | 96065235 |
| chr11 | 96065235 | 96065545 |
| chr11 | 96065545 | 96065796 |
| chr11 | 96075309 | 96075462 |
| chr11 | 96075494 | 96075860 |
| chr11 | 96075860 | 96076224 |
| chr11 | 96081115 | 96081265 |
| chr11 | 96091138 | 96091408 |
| chr11 | 96093212 | 96093388 |
| chr11 | 96093411 | 96093714 |
| chr11 | 96111858 | 96112083 |
| chr11 | 96114075 | 96114320 |
| chr11 | 96124354 | 96124596 |
| chr11 | 96124596 | 96124829 |
| chr11 | 96127036 | 96127302 |
| chr11 | 96130757 | 96130954 |
| chr11 | 96132842 | 96133101 |
| chr11 | 96133586 | 96133818 |
| chr11 | 96140696 | 96140991 |
| chr11 | 96140991 | 96141268 |
| chr11 | 96141268 | 96141598 |
| chr11 | 96145659 | 96145937 |
| chr11 | 96147562 | 96147714 |
| chr11 | 96151211 | 96151426 |
| chr11 | 96195770 | 96195920 |
| chr11 | 96231465 | 96231648 |
| chr11 | 96234996 | 96235241 |
| chr11 | 96260356 | 96260658 |
| chr11 | 96261627 | 96261873 |
| chr11 | 96270993 | 96271365 |

|       |          |          |
|-------|----------|----------|
| chr11 | 96271432 | 96272013 |
| chr11 | 96278835 | 96279100 |
| chr11 | 96279519 | 96279677 |
| chr11 | 96279775 | 96279947 |
| chr11 | 96283090 | 96283412 |
| chr11 | 96284140 | 96284432 |
| chr11 | 96284432 | 96284753 |
| chr11 | 96294594 | 96294836 |
| chr11 | 96294836 | 96295039 |
| chr11 | 96299211 | 96299580 |
| chr11 | 96303118 | 96303356 |
| chr11 | 96311618 | 96311856 |
| chr11 | 96353179 | 96353446 |
| chr11 | 96383734 | 96383884 |
| chr11 | 96391783 | 96392066 |
| chr11 | 96394307 | 96394500 |
| chr11 | 96397466 | 96397616 |
| chr11 | 96400062 | 96400214 |
| chr11 | 96407794 | 96408026 |
| chr11 | 96408383 | 96408543 |
| chr11 | 96413537 | 96414018 |
| chr11 | 96414018 | 96414344 |
| chr11 | 96435743 | 96436031 |
| chr11 | 96438823 | 96439145 |
| chr11 | 96458966 | 96459141 |
| chr11 | 96560154 | 96560504 |
| chr11 | 96572609 | 96572862 |
| chr11 | 96582085 | 96582337 |
| chr11 | 96602781 | 96603107 |
| chr11 | 96603107 | 96603391 |
| chr11 | 96604282 | 96604611 |
| chr11 | 96621276 | 96621494 |
| chr11 | 96622758 | 96623163 |
| chr11 | 96629877 | 96630069 |
| chr11 | 96639917 | 96640079 |
| chr11 | 96673918 | 96674078 |
| chr11 | 96704238 | 96704491 |
| chr11 | 96721742 | 96721924 |
| chr11 | 96725801 | 96726263 |
| chr11 | 96730603 | 96730793 |
| chr11 | 96732747 | 96732917 |
| chr11 | 96735992 | 96736233 |

|       |          |          |
|-------|----------|----------|
| chr11 | 96736385 | 96736751 |
| chr11 | 96736751 | 96737099 |
| chr11 | 96742081 | 96742364 |
| chr11 | 96747138 | 96747602 |
| chr11 | 96747602 | 96748060 |
| chr11 | 96749149 | 96749493 |
| chr11 | 96760054 | 96760482 |
| chr11 | 96765768 | 96765920 |
| chr11 | 96766264 | 96766586 |
| chr11 | 96766586 | 96767065 |
| chr11 | 96777313 | 96777990 |
| chr11 | 96784914 | 96785151 |
| chr11 | 96788956 | 96789252 |
| chr11 | 96789252 | 96789724 |
| chr11 | 96790124 | 96790350 |
| chr11 | 96795550 | 96795701 |
| chr11 | 96796688 | 96796871 |
| chr11 | 96805020 | 96805270 |
| chr11 | 96808133 | 96808363 |
| chr11 | 96811092 | 96811358 |
| chr11 | 96813505 | 96813668 |
| chr11 | 96813668 | 96813840 |
| chr11 | 96816011 | 96816178 |
| chr11 | 96816366 | 96816606 |
| chr11 | 96822637 | 96822975 |
| chr11 | 96822975 | 96823224 |
| chr11 | 96823908 | 96824614 |
| chr11 | 96829344 | 96829843 |
| chr11 | 96829843 | 96830311 |
| chr11 | 96830311 | 96830627 |
| chr11 | 96837250 | 96837695 |
| chr11 | 96840503 | 96840708 |
| chr11 | 96847062 | 96847298 |
| chr11 | 96848781 | 96848992 |
| chr11 | 96849571 | 96850018 |
| chr11 | 96850021 | 96850268 |
| chr11 | 96857519 | 96857877 |
| chr11 | 96860535 | 96860889 |
| chr11 | 96861280 | 96861514 |
| chr11 | 96861514 | 96861713 |
| chr11 | 96861713 | 96861961 |
| chr11 | 96861961 | 96862325 |

|       |          |          |
|-------|----------|----------|
| chr11 | 96863549 | 96863987 |
| chr11 | 96867193 | 96867472 |
| chr11 | 96875464 | 96875823 |
| chr11 | 96875823 | 96876112 |
| chr11 | 96895978 | 96896247 |
| chr11 | 96896247 | 96896471 |
| chr11 | 96909941 | 96910379 |
| chr11 | 96916013 | 96916358 |
| chr11 | 96916358 | 96916856 |
| chr11 | 96919021 | 96919576 |
| chr11 | 96928741 | 96929002 |
| chr11 | 96929047 | 96929621 |
| chr11 | 96929639 | 96930045 |
| chr11 | 96934858 | 96935471 |
| chr11 | 96936380 | 96936530 |
| chr11 | 96937502 | 96937862 |
| chr11 | 96943598 | 96943949 |
| chr11 | 96943949 | 96944431 |
| chr11 | 96950879 | 96951045 |
| chr11 | 96954294 | 96954466 |
| chr11 | 96954874 | 96955054 |
| chr11 | 96955172 | 96955422 |
| chr11 | 96958074 | 96958232 |
| chr11 | 96963612 | 96963901 |
| chr11 | 96966924 | 96967205 |
| chr11 | 96967205 | 96967453 |
| chr11 | 96967499 | 96967944 |
| chr11 | 96977051 | 96977286 |
| chr11 | 96977286 | 96977668 |
| chr11 | 96977668 | 96978272 |
| chr11 | 96982465 | 96982698 |
| chr11 | 96987969 | 96988127 |
| chr11 | 96988334 | 96988627 |
| chr11 | 96989481 | 96989639 |
| chr11 | 96991497 | 96991741 |
| chr11 | 96995127 | 96995324 |
| chr11 | 96997509 | 96997706 |
| chr11 | 97007129 | 97007652 |
| chr11 | 97012862 | 97013066 |
| chr11 | 97018581 | 97019088 |
| chr11 | 97021476 | 97021759 |
| chr11 | 97021759 | 97022154 |

|       |          |          |
|-------|----------|----------|
| chr11 | 97022154 | 97022495 |
| chr11 | 97026129 | 97026434 |
| chr11 | 97029708 | 97029999 |
| chr11 | 97029999 | 97030236 |
| chr11 | 97030236 | 97030459 |
| chr11 | 97030476 | 97030626 |
| chr11 | 97041261 | 97041487 |
| chr11 | 97041487 | 97041699 |
| chr11 | 97041699 | 97041953 |
| chr11 | 97048051 | 97048282 |
| chr11 | 97048282 | 97048592 |
| chr11 | 97050628 | 97051030 |
| chr11 | 97051264 | 97051511 |
| chr11 | 97051975 | 97052269 |
| chr11 | 97052269 | 97052894 |
| chr11 | 97058014 | 97058181 |
| chr11 | 97058434 | 97058813 |
| chr11 | 97065273 | 97065488 |
| chr11 | 97065586 | 97065974 |
| chr11 | 97065974 | 97066256 |
| chr11 | 97067049 | 97067226 |
| chr11 | 97072568 | 97073068 |
| chr11 | 97078889 | 97079040 |
| chr11 | 97083637 | 97084201 |
| chr11 | 97096033 | 97096504 |
| chr11 | 97097508 | 97097695 |
| chr11 | 97101754 | 97102207 |
| chr11 | 97112684 | 97112834 |
| chr11 | 97114601 | 97114891 |
| chr11 | 97114891 | 97115135 |
| chr11 | 97115218 | 97115402 |
| chr11 | 97123374 | 97123577 |
| chr11 | 97126888 | 97127192 |
| chr11 | 97127192 | 97127466 |
| chr11 | 97127611 | 97127772 |
| chr11 | 97130175 | 97130351 |
| chr11 | 97136625 | 97136816 |
| chr11 | 97140763 | 97141226 |
| chr11 | 97146820 | 97147051 |
| chr11 | 97148336 | 97148677 |
| chr11 | 97150634 | 97150862 |
| chr11 | 97152198 | 97152447 |

|       |          |          |
|-------|----------|----------|
| chr11 | 97152735 | 97152885 |
| chr11 | 97152921 | 97153219 |
| chr11 | 97159160 | 97159379 |
| chr11 | 97165685 | 97165920 |
| chr11 | 97168809 | 97169006 |
| chr11 | 97175580 | 97175841 |
| chr11 | 97176897 | 97177324 |
| chr11 | 97180840 | 97181036 |
| chr11 | 97186926 | 97187361 |
| chr11 | 97187361 | 97187578 |
| chr11 | 97187686 | 97188760 |
| chr11 | 97192234 | 97192735 |
| chr11 | 97195160 | 97195600 |
| chr11 | 97198686 | 97198843 |
| chr11 | 97199549 | 97199699 |
| chr11 | 97200788 | 97201055 |
| chr11 | 97206911 | 97207214 |
| chr11 | 97207214 | 97207453 |
| chr11 | 97207453 | 97207676 |
| chr11 | 97252314 | 97252536 |
| chr11 | 97270049 | 97270353 |
| chr11 | 97272891 | 97273129 |
| chr11 | 97273649 | 97273830 |
| chr11 | 97279280 | 97279572 |
| chr11 | 97279572 | 97279915 |
| chr11 | 97279915 | 97280243 |
| chr11 | 97280243 | 97280490 |
| chr11 | 97280490 | 97280898 |
| chr11 | 97285971 | 97286312 |
| chr11 | 97286312 | 97286598 |
| chr11 | 97298230 | 97298480 |
| chr11 | 97302119 | 97302742 |
| chr11 | 97308943 | 97309172 |
| chr11 | 97309306 | 97309822 |
| chr11 | 97309822 | 97310197 |
| chr11 | 97310214 | 97310540 |
| chr11 | 97315458 | 97315723 |
| chr11 | 97315723 | 97315957 |
| chr11 | 97315957 | 97316164 |
| chr11 | 97321811 | 97322224 |
| chr11 | 97322224 | 97322562 |
| chr11 | 97328119 | 97328501 |

|       |          |          |
|-------|----------|----------|
| chr11 | 97334229 | 97334434 |
| chr11 | 97335398 | 97335558 |
| chr11 | 97343454 | 97343772 |
| chr11 | 97343772 | 97344030 |
| chr11 | 97347751 | 97347908 |
| chr11 | 97349934 | 97350397 |
| chr11 | 97351187 | 97351363 |
| chr11 | 97361891 | 97362472 |
| chr11 | 97362472 | 97362940 |
| chr11 | 97362940 | 97363278 |
| chr11 | 97363457 | 97363707 |
| chr11 | 97400199 | 97400714 |
| chr11 | 97400718 | 97400878 |
| chr11 | 97401010 | 97401488 |
| chr11 | 97401488 | 97401807 |
| chr11 | 97401807 | 97402027 |
| chr11 | 97408264 | 97408536 |
| chr11 | 97411023 | 97411185 |
| chr11 | 97412579 | 97412763 |
| chr11 | 97415356 | 97415706 |
| chr11 | 97415706 | 97416018 |
| chr11 | 97416018 | 97416321 |
| chr11 | 97419380 | 97419986 |
| chr11 | 97420834 | 97421102 |
| chr11 | 97427724 | 97428038 |
| chr11 | 97428038 | 97428787 |
| chr11 | 97429672 | 97429943 |
| chr11 | 97434671 | 97435127 |
| chr11 | 97435127 | 97435464 |
| chr11 | 97435592 | 97435882 |
| chr11 | 97435882 | 97436180 |
| chr11 | 97440063 | 97440229 |
| chr11 | 97440498 | 97440828 |
| chr11 | 97440997 | 97441384 |
| chr11 | 97441454 | 97441609 |
| chr11 | 97441865 | 97442088 |
| chr11 | 97449514 | 97449917 |
| chr11 | 97449917 | 97450244 |
| chr11 | 97450244 | 97450531 |
| chr11 | 97450531 | 97451028 |
| chr11 | 97456859 | 97457145 |
| chr11 | 97457145 | 97457530 |

|       |          |          |
|-------|----------|----------|
| chr11 | 97462626 | 97462838 |
| chr11 | 97463922 | 97464224 |
| chr11 | 97466544 | 97466707 |
| chr11 | 97468344 | 97468690 |
| chr11 | 97468690 | 97468982 |
| chr11 | 97468982 | 97469295 |
| chr11 | 97476321 | 97476707 |
| chr11 | 97477061 | 97477442 |
| chr11 | 97477442 | 97477821 |
| chr11 | 97487480 | 97487819 |
| chr11 | 97489565 | 97489973 |
| chr11 | 97489973 | 97490253 |
| chr11 | 97496723 | 97497008 |
| chr11 | 97502292 | 97503028 |
| chr11 | 97505783 | 97505912 |
| chr11 | 97505912 | 97506050 |
| chr11 | 97507900 | 97508293 |
| chr11 | 97508293 | 97508738 |
| chr11 | 97513107 | 97513391 |
| chr11 | 97513391 | 97513825 |
| chr11 | 97523521 | 97523850 |
| chr11 | 97523850 | 97524088 |
| chr11 | 97524088 | 97524339 |
| chr11 | 97524339 | 97524633 |
| chr11 | 97531691 | 97531994 |
| chr11 | 97531994 | 97532421 |
| chr11 | 97533134 | 97533368 |
| chr11 | 97540206 | 97540397 |
| chr11 | 97541017 | 97541184 |
| chr11 | 97546411 | 97546590 |
| chr11 | 97546728 | 97547393 |
| chr11 | 97554165 | 97554354 |
| chr11 | 97557070 | 97557319 |
| chr11 | 97562603 | 97562874 |
| chr11 | 97563368 | 97563689 |
| chr11 | 97563689 | 97564164 |
| chr11 | 97564283 | 97564688 |
| chr11 | 97574278 | 97574556 |
| chr11 | 97574722 | 97574874 |
| chr11 | 97574980 | 97575621 |
| chr11 | 97575621 | 97576147 |
| chr11 | 97576254 | 97576537 |



|       |          |          |
|-------|----------|----------|
| chr11 | 97576537 | 97576719 |
| chr11 | 97578358 | 97578599 |
| chr11 | 97591975 | 97592241 |
| chr11 | 97603925 | 97604179 |
| chr11 | 97611054 | 97611528 |
| chr11 | 97612859 | 97613028 |
| chr11 | 97619377 | 97619611 |
| chr11 | 97619611 | 97619860 |
| chr11 | 97622489 | 97622769 |
| chr11 | 97623258 | 97623564 |
| chr11 | 97623726 | 97624065 |
| chr11 | 97626871 | 97627167 |
| chr11 | 97628567 | 97628956 |
| chr11 | 97628956 | 97629243 |
| chr11 | 97629272 | 97629553 |
| chr11 | 97629600 | 97629988 |
| chr11 | 97632007 | 97632255 |
| chr11 | 97639151 | 97639336 |
| chr11 | 97639547 | 97639864 |
| chr11 | 97644868 | 97645285 |
| chr11 | 97645506 | 97645709 |
| chr11 | 97650412 | 97650755 |
| chr11 | 97653334 | 97653631 |
| chr11 | 97657305 | 97657620 |
| chr11 | 97660185 | 97660529 |
| chr11 | 97660529 | 97660765 |
| chr11 | 97661690 | 97662047 |
| chr11 | 97662231 | 97662658 |
| chr11 | 97662947 | 97663332 |
| chr11 | 97664229 | 97664396 |
| chr11 | 97664763 | 97664936 |
| chr11 | 97670844 | 97671173 |
| chr11 | 97671864 | 97672073 |
| chr11 | 97677908 | 97678123 |
| chr11 | 97685523 | 97686051 |
| chr11 | 97695175 | 97695434 |
| chr11 | 97698839 | 97699085 |
| chr11 | 97699679 | 97699907 |
| chr11 | 97699950 | 97700200 |
| chr11 | 97700200 | 97700429 |
| chr11 | 97700429 | 97700658 |
| chr11 | 97702412 | 97702645 |

|       |          |          |
|-------|----------|----------|
| chr11 | 97702645 | 97702873 |
| chr11 | 97703029 | 97703414 |
| chr11 | 97703414 | 97703714 |
| chr11 | 97712959 | 97713119 |
| chr11 | 97714536 | 97714707 |
| chr11 | 97714809 | 97715124 |
| chr11 | 97715432 | 97715684 |
| chr11 | 97717727 | 97717920 |
| chr11 | 97719164 | 97719319 |
| chr11 | 97726514 | 97726912 |
| chr11 | 97727788 | 97728126 |
| chr11 | 97728260 | 97728609 |
| chr11 | 97728609 | 97728880 |
| chr11 | 97728880 | 97729157 |
| chr11 | 97735586 | 97736007 |
| chr11 | 97736608 | 97737063 |
| chr11 | 97737063 | 97737433 |
| chr11 | 97744081 | 97744545 |
| chr11 | 97744545 | 97744784 |
| chr11 | 97744784 | 97745030 |
| chr11 | 97745030 | 97745474 |
| chr11 | 97748840 | 97749061 |
| chr11 | 97751605 | 97751918 |
| chr11 | 97751918 | 97752480 |
| chr11 | 97766257 | 97766470 |
| chr11 | 97766470 | 97766948 |
| chr11 | 97769604 | 97770125 |
| chr11 | 97775133 | 97775294 |
| chr11 | 97775416 | 97775584 |
| chr11 | 97775760 | 97775989 |
| chr11 | 97775989 | 97776285 |
| chr11 | 97776479 | 97776749 |
| chr11 | 97776796 | 97777097 |
| chr11 | 97777097 | 97777407 |
| chr11 | 97781732 | 97781994 |
| chr11 | 97781994 | 97782288 |
| chr11 | 97782288 | 97782790 |
| chr11 | 97782860 | 97783024 |
| chr11 | 97791011 | 97791161 |
| chr11 | 97793229 | 97793552 |
| chr11 | 97798884 | 97799332 |
| chr11 | 97799361 | 97799773 |

|       |          |          |
|-------|----------|----------|
| chr11 | 97799773 | 97800039 |
| chr11 | 97800039 | 97800383 |
| chr11 | 97801189 | 97801367 |
| chr11 | 97801511 | 97801953 |
| chr11 | 97803926 | 97804230 |
| chr11 | 97806152 | 97806346 |
| chr11 | 97808085 | 97808287 |
| chr11 | 97809081 | 97809290 |
| chr11 | 97809353 | 97809584 |
| chr11 | 97810290 | 97810648 |
| chr11 | 97811949 | 97812373 |
| chr11 | 97813193 | 97813422 |
| chr11 | 97813773 | 97814173 |
| chr11 | 97814173 | 97814431 |
| chr11 | 97815812 | 97816034 |
| chr11 | 97820737 | 97821220 |
| chr11 | 97821293 | 97821738 |
| chr11 | 97821819 | 97822053 |
| chr11 | 97827722 | 97828021 |
| chr11 | 97829418 | 97829688 |
| chr11 | 97830077 | 97830227 |
| chr11 | 97834081 | 97834277 |
| chr11 | 97838867 | 97839185 |
| chr11 | 97839185 | 97839500 |
| chr11 | 97839500 | 97839770 |
| chr11 | 97840561 | 97840819 |
| chr11 | 97843972 | 97844293 |
| chr11 | 97850465 | 97850626 |
| chr11 | 97850710 | 97850887 |
| chr11 | 97855492 | 97855902 |
| chr11 | 97857451 | 97857933 |
| chr11 | 97862211 | 97862378 |
| chr11 | 97862556 | 97863025 |
| chr11 | 97883536 | 97883868 |
| chr11 | 97884006 | 97884383 |
| chr11 | 97884383 | 97884654 |
| chr11 | 97889640 | 97889848 |
| chr11 | 97899848 | 97900126 |
| chr11 | 97900126 | 97900437 |
| chr11 | 97901866 | 97902255 |
| chr11 | 97904913 | 97905077 |
| chr11 | 97909075 | 97909255 |

|       |          |          |
|-------|----------|----------|
| chr11 | 97920911 | 97921151 |
| chr11 | 97935731 | 97936337 |
| chr11 | 97936850 | 97937143 |
| chr11 | 97943314 | 97943555 |
| chr11 | 97947520 | 97947752 |
| chr11 | 97949622 | 97949994 |
| chr11 | 97955968 | 97956125 |
| chr11 | 97958527 | 97958847 |
| chr11 | 97960964 | 97961260 |
| chr11 | 97971126 | 97971772 |
| chr11 | 97977867 | 97978133 |
| chr11 | 97986369 | 97986519 |
| chr11 | 97987576 | 97987911 |
| chr11 | 97987911 | 97988164 |
| chr11 | 97988164 | 97988577 |
| chr11 | 97988577 | 97989117 |
| chr11 | 97993945 | 97994202 |
| chr11 | 97994202 | 97994542 |
| chr11 | 97994542 | 97994872 |
| chr11 | 97994872 | 97995214 |
| chr11 | 97998200 | 97998406 |
| chr11 | 98002697 | 98003068 |
| chr11 | 98003074 | 98003397 |
| chr11 | 98003397 | 98003732 |
| chr11 | 98003788 | 98004136 |
| chr11 | 98004209 | 98004462 |
| chr11 | 98013942 | 98014097 |
| chr11 | 98019276 | 98019580 |
| chr11 | 98020814 | 98021096 |
| chr11 | 98022406 | 98022764 |
| chr11 | 98026520 | 98026749 |
| chr11 | 98026879 | 98027074 |
| chr11 | 98027074 | 98027451 |
| chr11 | 98027459 | 98027609 |
| chr11 | 98030777 | 98031049 |
| chr11 | 98031140 | 98031484 |
| chr11 | 98031533 | 98031710 |
| chr11 | 98034034 | 98034387 |
| chr11 | 98035831 | 98036181 |
| chr11 | 98036181 | 98036422 |
| chr11 | 98043746 | 98043897 |
| chr11 | 98045692 | 98045901 |

|       |          |          |
|-------|----------|----------|
| chr11 | 98046501 | 98046662 |
| chr11 | 98050313 | 98050468 |
| chr11 | 98052239 | 98052736 |
| chr11 | 98052748 | 98052920 |
| chr11 | 98057407 | 98057716 |
| chr11 | 98057716 | 98057923 |
| chr11 | 98057972 | 98058366 |
| chr11 | 98061983 | 98062217 |
| chr11 | 98062274 | 98062445 |
| chr11 | 98063885 | 98064078 |
| chr11 | 98068386 | 98068581 |
| chr11 | 98075271 | 98075492 |
| chr11 | 98075492 | 98075711 |
| chr11 | 98075711 | 98075900 |
| chr11 | 98080573 | 98080813 |
| chr11 | 98086719 | 98086919 |
| chr11 | 98088249 | 98088479 |
| chr11 | 98090622 | 98090877 |
| chr11 | 98090877 | 98091254 |
| chr11 | 98139088 | 98139434 |
| chr11 | 98148913 | 98149207 |
| chr11 | 98149207 | 98149517 |
| chr11 | 98149517 | 98149781 |
| chr11 | 98149781 | 98150069 |
| chr11 | 98150069 | 98150383 |
| chr11 | 98150383 | 98150717 |
| chr11 | 98182235 | 98182491 |
| chr11 | 98182491 | 98182790 |
| chr11 | 98192808 | 98193185 |
| chr11 | 98193185 | 98193483 |
| chr11 | 98193483 | 98193680 |
| chr11 | 98202148 | 98202300 |
| chr11 | 98202503 | 98203001 |
| chr11 | 98203001 | 98203394 |
| chr11 | 98203394 | 98203725 |
| chr11 | 98204203 | 98204402 |
| chr11 | 98209468 | 98209665 |
| chr11 | 98209866 | 98210016 |
| chr11 | 98264933 | 98265398 |
| chr11 | 98286279 | 98286493 |
| chr11 | 98294281 | 98295119 |
| chr11 | 98296368 | 98296624 |

|       |          |          |
|-------|----------|----------|
| chr11 | 98300476 | 98300687 |
| chr11 | 98313932 | 98314130 |
| chr11 | 98314130 | 98314353 |
| chr11 | 98322177 | 98322343 |
| chr11 | 98324097 | 98324278 |
| chr11 | 98327283 | 98327779 |
| chr11 | 98327784 | 98328062 |
| chr11 | 98328215 | 98328412 |
| chr11 | 98328425 | 98328586 |
| chr11 | 98334409 | 98334585 |
| chr11 | 98334585 | 98334790 |
| chr11 | 98335349 | 98335499 |
| chr11 | 98336286 | 98336549 |
| chr11 | 98342055 | 98342292 |
| chr11 | 98342476 | 98342929 |
| chr11 | 98342959 | 98343327 |
| chr11 | 98345300 | 98345585 |
| chr11 | 98348135 | 98348358 |
| chr11 | 98348500 | 98348748 |
| chr11 | 98348748 | 98349075 |
| chr11 | 98355807 | 98356099 |
| chr11 | 98357121 | 98357364 |
| chr11 | 98357942 | 98358464 |
| chr11 | 98358464 | 98358762 |
| chr11 | 98371832 | 98372077 |
| chr11 | 98372135 | 98372312 |
| chr11 | 98372491 | 98372728 |
| chr11 | 98384460 | 98384661 |
| chr11 | 98389484 | 98389744 |
| chr11 | 98391584 | 98391796 |
| chr11 | 98392032 | 98392335 |
| chr11 | 98392615 | 98392924 |
| chr11 | 98393267 | 98393608 |
| chr11 | 98400076 | 98400354 |
| chr11 | 98400354 | 98400639 |
| chr11 | 98400849 | 98401173 |
| chr11 | 98404773 | 98405192 |
| chr11 | 98412233 | 98412659 |
| chr11 | 98412659 | 98412978 |
| chr11 | 98412978 | 98413163 |
| chr11 | 98413772 | 98413991 |
| chr11 | 98418309 | 98418522 |

|       |          |          |
|-------|----------|----------|
| chr11 | 98418671 | 98419193 |
| chr11 | 98419193 | 98419516 |
| chr11 | 98438415 | 98439207 |
| chr11 | 98445722 | 98446024 |
| chr11 | 98446664 | 98447167 |
| chr11 | 98447228 | 98447449 |
| chr11 | 98447449 | 98447677 |
| chr11 | 98447882 | 98448083 |
| chr11 | 98448144 | 98448383 |
| chr11 | 98448383 | 98448613 |
| chr11 | 98448613 | 98448844 |
| chr11 | 98449427 | 98449685 |
| chr11 | 98449685 | 98449988 |
| chr11 | 98457084 | 98457355 |
| chr11 | 98457355 | 98457729 |
| chr11 | 98457729 | 98458352 |
| chr11 | 98461437 | 98461642 |
| chr11 | 98469842 | 98470008 |
| chr11 | 98470142 | 98470536 |
| chr11 | 98470536 | 98470792 |
| chr11 | 98520502 | 98520661 |
| chr11 | 98520669 | 98520870 |
| chr11 | 98550809 | 98551216 |
| chr11 | 98551216 | 98551669 |
| chr11 | 98586914 | 98587158 |
| chr11 | 98587158 | 98587537 |
| chr11 | 98588106 | 98588609 |
| chr11 | 98588867 | 98589053 |
| chr11 | 98596014 | 98596198 |
| chr11 | 98597423 | 98597639 |
| chr11 | 98598113 | 98598263 |
| chr11 | 98599072 | 98599421 |
| chr11 | 98599421 | 98599642 |
| chr11 | 98601018 | 98601175 |
| chr11 | 98602131 | 98602409 |
| chr11 | 98604081 | 98604253 |
| chr11 | 98604970 | 98605131 |
| chr11 | 98606807 | 98607040 |
| chr11 | 98635328 | 98635858 |
| chr11 | 98653031 | 98653303 |
| chr11 | 98654973 | 98655679 |
| chr11 | 98660596 | 98660890 |

|       |          |          |
|-------|----------|----------|
| chr11 | 98660927 | 98661090 |
| chr11 | 98662385 | 98662583 |
| chr11 | 98664247 | 98664442 |
| chr11 | 98671930 | 98672210 |
| chr11 | 98673079 | 98673296 |
| chr11 | 98673296 | 98673892 |
| chr11 | 98682095 | 98682451 |
| chr11 | 98682451 | 98682755 |
| chr11 | 98682755 | 98682980 |
| chr11 | 98682980 | 98683195 |
| chr11 | 98688057 | 98688350 |
| chr11 | 98699951 | 98700295 |
| chr11 | 98700295 | 98700854 |
| chr11 | 98705952 | 98706252 |
| chr11 | 98706311 | 98706514 |
| chr11 | 98708113 | 98708288 |
| chr11 | 98708484 | 98708877 |
| chr11 | 98709042 | 98709267 |
| chr11 | 98709267 | 98709523 |
| chr11 | 98709523 | 98709919 |
| chr11 | 98710435 | 98710770 |
| chr11 | 98717949 | 98718117 |
| chr11 | 98719616 | 98719794 |
| chr11 | 98721369 | 98722121 |
| chr11 | 98729132 | 98729645 |
| chr11 | 98740526 | 98740766 |
| chr11 | 98741609 | 98741897 |
| chr11 | 98741897 | 98742148 |
| chr11 | 98742148 | 98742444 |
| chr11 | 98744045 | 98744234 |
| chr11 | 98747490 | 98747694 |
| chr11 | 98750498 | 98750953 |
| chr11 | 98750953 | 98751372 |
| chr11 | 98754093 | 98754554 |
| chr11 | 98754712 | 98755162 |
| chr11 | 98762698 | 98762926 |
| chr11 | 98762926 | 98763207 |
| chr11 | 98763207 | 98763548 |
| chr11 | 98763548 | 98763869 |
| chr11 | 98772634 | 98773239 |
| chr11 | 98773627 | 98773909 |
| chr11 | 98773909 | 98774284 |



|       |          |          |
|-------|----------|----------|
| chr11 | 98775186 | 98775719 |
| chr11 | 98775817 | 98776092 |
| chr11 | 98783234 | 98783699 |
| chr11 | 98785811 | 98786050 |
| chr11 | 98786369 | 98786592 |
| chr11 | 98786592 | 98786869 |
| chr11 | 98786869 | 98787254 |
| chr11 | 98788768 | 98789222 |
| chr11 | 98789267 | 98789440 |
| chr11 | 98794419 | 98794703 |
| chr11 | 98794703 | 98794995 |
| chr11 | 98794995 | 98795276 |
| chr11 | 98795276 | 98795517 |
| chr11 | 98795517 | 98795737 |
| chr11 | 98795737 | 98796071 |
| chr11 | 98796071 | 98796517 |
| chr11 | 98796554 | 98796757 |
| chr11 | 98809503 | 98809942 |
| chr11 | 98809942 | 98810330 |
| chr11 | 98826111 | 98826395 |
| chr11 | 98829455 | 98829612 |
| chr11 | 98836443 | 98836598 |
| chr11 | 98836604 | 98836890 |
| chr11 | 98836890 | 98837156 |
| chr11 | 98839465 | 98839734 |
| chr11 | 98846125 | 98846348 |
| chr11 | 98846918 | 98847141 |
| chr11 | 98851556 | 98851708 |
| chr11 | 98857577 | 98857752 |
| chr11 | 98858766 | 98859094 |
| chr11 | 98859133 | 98859421 |
| chr11 | 98863078 | 98863231 |
| chr11 | 98863404 | 98863727 |
| chr11 | 98863727 | 98863995 |
| chr11 | 98863995 | 98864568 |
| chr11 | 98870847 | 98871016 |
| chr11 | 98873855 | 98874333 |
| chr11 | 98887801 | 98888023 |
| chr11 | 98895223 | 98895499 |
| chr11 | 98902621 | 98902900 |
| chr11 | 98905025 | 98905486 |
| chr11 | 98907548 | 98908199 |

|       |          |          |
|-------|----------|----------|
| chr11 | 98916438 | 98916684 |
| chr11 | 98918346 | 98918565 |
| chr11 | 98921871 | 98922075 |
| chr11 | 98922333 | 98922613 |
| chr11 | 98930886 | 98931135 |
| chr11 | 98932478 | 98932801 |
| chr11 | 98932953 | 98933194 |
| chr11 | 98933194 | 98933599 |
| chr11 | 98935949 | 98936159 |
| chr11 | 98936159 | 98936447 |
| chr11 | 98937446 | 98937782 |
| chr11 | 98941389 | 98941671 |
| chr11 | 98941710 | 98942264 |
| chr11 | 98942264 | 98942634 |
| chr11 | 98942664 | 98942848 |
| chr11 | 98942869 | 98943220 |
| chr11 | 98947932 | 98948283 |
| chr11 | 98948283 | 98948522 |
| chr11 | 98950018 | 98950173 |
| chr11 | 98953912 | 98954192 |
| chr11 | 98954271 | 98954572 |
| chr11 | 98959492 | 98960091 |
| chr11 | 98960141 | 98960538 |
| chr11 | 98960538 | 98960865 |
| chr11 | 98961063 | 98961240 |
| chr11 | 98961420 | 98961613 |
| chr11 | 98961879 | 98962122 |
| chr11 | 98963119 | 98963580 |
| chr11 | 98963636 | 98964063 |
| chr11 | 98966704 | 98966913 |
| chr11 | 98972122 | 98972300 |
| chr11 | 98972300 | 98972580 |
| chr11 | 98975184 | 98975657 |
| chr11 | 98981910 | 98982434 |
| chr11 | 98982434 | 98983043 |
| chr11 | 98990987 | 98991269 |
| chr11 | 98991771 | 98991913 |
| chr11 | 98991913 | 98992008 |
| chr11 | 98994016 | 98994305 |
| chr11 | 98994305 | 98994622 |
| chr11 | 99018700 | 99018861 |
| chr11 | 99023524 | 99023688 |

|       |          |          |
|-------|----------|----------|
| chr11 | 99023688 | 99023978 |
| chr11 | 99023978 | 99024300 |
| chr11 | 99024300 | 99024559 |
| chr11 | 99029466 | 99029666 |
| chr11 | 99031265 | 99031437 |
| chr11 | 99035462 | 99035622 |
| chr11 | 99039797 | 99040065 |
| chr11 | 99040065 | 99040266 |
| chr11 | 99040310 | 99040605 |
| chr11 | 99040680 | 99040905 |
| chr11 | 99040922 | 99041387 |
| chr11 | 99041387 | 99041958 |
| chr11 | 99047876 | 99048105 |
| chr11 | 99052327 | 99052495 |
| chr11 | 99054710 | 99054874 |
| chr11 | 99059941 | 99060164 |
| chr11 | 99060166 | 99060452 |
| chr11 | 99061771 | 99061995 |
| chr11 | 99062239 | 99062478 |
| chr11 | 99062998 | 99063217 |
| chr11 | 99063223 | 99063436 |
| chr11 | 99063463 | 99063639 |
| chr11 | 99066051 | 99066363 |
| chr11 | 99069280 | 99069543 |
| chr11 | 99070308 | 99070463 |
| chr11 | 99076515 | 99077000 |
| chr11 | 99077000 | 99077396 |
| chr11 | 99082122 | 99082442 |
| chr11 | 99082592 | 99082943 |
| chr11 | 99088530 | 99088775 |
| chr11 | 99088791 | 99089214 |
| chr11 | 99089214 | 99089739 |
| chr11 | 99089783 | 99089948 |
| chr11 | 99095022 | 99095206 |
| chr11 | 99098867 | 99099323 |
| chr11 | 99101847 | 99102008 |
| chr11 | 99102954 | 99103290 |
| chr11 | 99104602 | 99105028 |
| chr11 | 99105028 | 99105308 |
| chr11 | 99106061 | 99106258 |
| chr11 | 99106345 | 99106780 |
| chr11 | 99106780 | 99107126 |

|       |          |          |
|-------|----------|----------|
| chr11 | 99107126 | 99107441 |
| chr11 | 99108257 | 99108754 |
| chr11 | 99115371 | 99115523 |
| chr11 | 99115912 | 99116163 |
| chr11 | 99123986 | 99124254 |
| chr11 | 99126541 | 99126731 |
| chr11 | 99126926 | 99127076 |
| chr11 | 99127795 | 99128181 |
| chr11 | 99128181 | 99128499 |
| chr11 | 99137433 | 99137734 |
| chr11 | 99145810 | 99146161 |
| chr11 | 99149936 | 99150273 |
| chr11 | 99150891 | 99151260 |
| chr11 | 99155095 | 99155329 |
| chr11 | 99162993 | 99163311 |
| chr11 | 99189121 | 99189358 |
| chr11 | 99189358 | 99189793 |
| chr11 | 99196218 | 99196383 |
| chr11 | 99199967 | 99200243 |
| chr11 | 99200243 | 99200609 |
| chr11 | 99207162 | 99207388 |
| chr11 | 99207618 | 99207768 |
| chr11 | 99210976 | 99211135 |
| chr11 | 99221875 | 99222101 |
| chr11 | 99229639 | 99230044 |
| chr11 | 99230044 | 99230340 |
| chr11 | 99230340 | 99230588 |
| chr11 | 99230588 | 99230828 |
| chr11 | 99230828 | 99231035 |
| chr11 | 99231035 | 99231273 |
| chr11 | 99249170 | 99249394 |
| chr11 | 99268303 | 99268455 |
| chr11 | 99268654 | 99268892 |
| chr11 | 99268921 | 99269266 |
| chr11 | 99269266 | 99269613 |
| chr11 | 99269641 | 99269793 |
| chr11 | 99283467 | 99283649 |
| chr11 | 99292889 | 99293148 |
| chr11 | 99295186 | 99295369 |
| chr11 | 99295701 | 99295897 |
| chr11 | 99304680 | 99304846 |
| chr11 | 99307596 | 99307913 |

|       |          |          |
|-------|----------|----------|
| chr11 | 99310891 | 99311208 |
| chr11 | 99311784 | 99311955 |
| chr11 | 99323733 | 99324046 |
| chr11 | 99331397 | 99331549 |
| chr11 | 99341780 | 99342425 |
| chr11 | 99345981 | 99346448 |
| chr11 | 99364530 | 99364762 |
| chr11 | 99366900 | 99367162 |
| chr11 | 99379659 | 99379921 |
| chr11 | 99385847 | 99386263 |
| chr11 | 99386263 | 99386734 |
| chr11 | 99409243 | 99409398 |
| chr11 | 99414875 | 99415030 |
| chr11 | 99424620 | 99424829 |
| chr11 | 99438024 | 99438319 |
| chr11 | 99454084 | 99454234 |
| chr11 | 99454864 | 99455057 |
| chr11 | 99458811 | 99459261 |
| chr11 | 99463243 | 99463469 |
| chr11 | 99464873 | 99465354 |
| chr11 | 99465664 | 99465935 |
| chr11 | 99468605 | 99468902 |
| chr11 | 99471922 | 99472377 |
| chr11 | 99472377 | 99472753 |
| chr11 | 99473379 | 99473776 |
| chr11 | 99490803 | 99491048 |
| chr11 | 99492082 | 99492360 |
| chr11 | 99493164 | 99493314 |
| chr11 | 99496392 | 99496861 |
| chr11 | 99507835 | 99508608 |
| chr11 | 99514044 | 99514647 |
| chr11 | 99516511 | 99516751 |
| chr11 | 99516895 | 99517175 |
| chr11 | 99517175 | 99517574 |
| chr11 | 99524232 | 99524441 |
| chr11 | 99524441 | 99524782 |
| chr11 | 99526171 | 99526357 |
| chr11 | 99530015 | 99530335 |
| chr11 | 99554201 | 99554482 |
| chr11 | 99556828 | 99557151 |
| chr11 | 99558474 | 99558925 |
| chr11 | 99559200 | 99559457 |

|       |          |          |
|-------|----------|----------|
| chr11 | 99562502 | 99562922 |
| chr11 | 99574031 | 99574489 |
| chr11 | 99575672 | 99576007 |
| chr11 | 99580627 | 99580988 |
| chr11 | 99581100 | 99581432 |
| chr11 | 99581576 | 99582025 |
| chr11 | 99587375 | 99587573 |
| chr11 | 99590957 | 99591107 |
| chr11 | 99597760 | 99597910 |
| chr11 | 99603065 | 99603226 |
| chr11 | 99614780 | 99615444 |
| chr11 | 99616028 | 99616265 |
| chr11 | 99620727 | 99621043 |
| chr11 | 99625795 | 99626025 |
| chr11 | 99626095 | 99626274 |
| chr11 | 99627623 | 99627856 |
| chr11 | 99630547 | 99630734 |
| chr11 | 99630951 | 99631285 |
| chr11 | 99634461 | 99634765 |
| chr11 | 99634765 | 99635053 |
| chr11 | 99636273 | 99636493 |
| chr11 | 99636493 | 99636679 |
| chr11 | 99640889 | 99641285 |
| chr11 | 99657528 | 99657775 |
| chr11 | 99658310 | 99658683 |
| chr11 | 99658683 | 99658978 |
| chr11 | 99659083 | 99659644 |
| chr11 | 99659793 | 99660042 |
| chr11 | 99768271 | 99768486 |
| chr11 | 99768486 | 99768765 |
| chr11 | 99773051 | 99773382 |
| chr11 | 99773382 | 99773590 |
| chr11 | 99784810 | 99784994 |
| chr11 | 99809647 | 99809802 |
| chr11 | 99825064 | 99825227 |
| chr11 | 99825925 | 99826080 |
| chr11 | 99851071 | 99851374 |
| chr11 | 99851374 | 99851686 |
| chr11 | 99851686 | 99852055 |
| chr11 | 99858031 | 99858414 |
| chr11 | 99858414 | 99858620 |
| chr11 | 99858620 | 99858857 |

|       |           |           |
|-------|-----------|-----------|
| chr11 | 99858857  | 99859110  |
| chr11 | 99859110  | 99859363  |
| chr11 | 99873578  | 99873782  |
| chr11 | 99879345  | 99879559  |
| chr11 | 99937667  | 99937972  |
| chr11 | 99989780  | 99990082  |
| chr11 | 99990082  | 99990359  |
| chr11 | 99994362  | 99994573  |
| chr11 | 100004956 | 100005126 |
| chr11 | 100005904 | 100006263 |
| chr11 | 100013771 | 100013947 |
| chr11 | 100013947 | 100014196 |
| chr11 | 100046404 | 100046599 |
| chr11 | 100046599 | 100046773 |
| chr11 | 100055591 | 100056179 |
| chr11 | 100056179 | 100056683 |
| chr11 | 100065994 | 100066267 |
| chr11 | 100067392 | 100067683 |
| chr11 | 100067683 | 100068139 |
| chr11 | 100073791 | 100074349 |
| chr11 | 100085364 | 100085646 |
| chr11 | 100090015 | 100090399 |
| chr11 | 100113026 | 100113484 |
| chr11 | 100113484 | 100114113 |
| chr11 | 100120404 | 100120821 |
| chr11 | 100132139 | 100132435 |
| chr11 | 100138509 | 100138818 |
| chr11 | 100138818 | 100139195 |
| chr11 | 100139195 | 100139501 |
| chr11 | 100139501 | 100139775 |
| chr11 | 100139775 | 100140058 |
| chr11 | 100144952 | 100145186 |
| chr11 | 100145186 | 100145427 |
| chr11 | 100145427 | 100145842 |
| chr11 | 100145842 | 100146538 |
| chr11 | 100147597 | 100147939 |
| chr11 | 100151143 | 100151293 |
| chr11 | 100153838 | 100154197 |
| chr11 | 100157420 | 100157717 |
| chr11 | 100157717 | 100158051 |
| chr11 | 100158051 | 100158376 |
| chr11 | 100159388 | 100159972 |

|       |           |           |
|-------|-----------|-----------|
| chr11 | 100166684 | 100167049 |
| chr11 | 100168065 | 100168656 |
| chr11 | 100168799 | 100169043 |
| chr11 | 100169043 | 100169348 |
| chr11 | 100169422 | 100169697 |
| chr11 | 100170092 | 100170271 |
| chr11 | 100182693 | 100182863 |
| chr11 | 100198541 | 100199110 |
| chr11 | 100200172 | 100200347 |
| chr11 | 100201479 | 100201639 |
| chr11 | 100203564 | 100203714 |
| chr11 | 100207347 | 100207864 |
| chr11 | 100207864 | 100208105 |
| chr11 | 100208347 | 100208603 |
| chr11 | 100208905 | 100209113 |
| chr11 | 100209851 | 100210006 |
| chr11 | 100215210 | 100215511 |
| chr11 | 100215511 | 100215874 |
| chr11 | 100221026 | 100221186 |
| chr11 | 100232167 | 100232352 |
| chr11 | 100248836 | 100249522 |
| chr11 | 100254238 | 100255090 |
| chr11 | 100255632 | 100256065 |
| chr11 | 100261178 | 100261523 |
| chr11 | 100277711 | 100278086 |
| chr11 | 100278086 | 100278424 |
| chr11 | 100278424 | 100278881 |
| chr11 | 100282057 | 100282227 |
| chr11 | 100282668 | 100282885 |
| chr11 | 100286922 | 100287465 |
| chr11 | 100288919 | 100289373 |
| chr11 | 100289967 | 100290258 |
| chr11 | 100290258 | 100290600 |
| chr11 | 100295381 | 100295671 |
| chr11 | 100296404 | 100296748 |
| chr11 | 100298347 | 100298639 |
| chr11 | 100298639 | 100299216 |
| chr11 | 100305287 | 100305800 |
| chr11 | 100306556 | 100306862 |
| chr11 | 100306953 | 100307259 |
| chr11 | 100312037 | 100312262 |
| chr11 | 100312504 | 100312669 |



|       |           |           |
|-------|-----------|-----------|
| chr11 | 100319575 | 100319821 |
| chr11 | 100319821 | 100320203 |
| chr11 | 100320203 | 100320713 |
| chr11 | 100322896 | 100323065 |
| chr11 | 100323536 | 100323869 |
| chr11 | 100326892 | 100327146 |
| chr11 | 100333228 | 100333397 |
| chr11 | 100334033 | 100334417 |
| chr11 | 100335816 | 100336097 |
| chr11 | 100346857 | 100347227 |
| chr11 | 100355076 | 100355339 |
| chr11 | 100355339 | 100355649 |
| chr11 | 100355649 | 100355973 |
| chr11 | 100355973 | 100356267 |
| chr11 | 100356298 | 100356482 |
| chr11 | 100356482 | 100356689 |
| chr11 | 100361145 | 100361383 |
| chr11 | 100362499 | 100362926 |
| chr11 | 100362980 | 100363233 |
| chr11 | 100363247 | 100363531 |
| chr11 | 100364251 | 100364475 |
| chr11 | 100365539 | 100365823 |
| chr11 | 100372264 | 100372424 |
| chr11 | 100372827 | 100373065 |
| chr11 | 100376824 | 100377002 |
| chr11 | 100386684 | 100387028 |
| chr11 | 100387598 | 100387976 |
| chr11 | 100387976 | 100388365 |
| chr11 | 100391118 | 100391316 |
| chr11 | 100393669 | 100393898 |
| chr11 | 100393898 | 100394169 |
| chr11 | 100395286 | 100395649 |
| chr11 | 100395730 | 100396144 |
| chr11 | 100396920 | 100397083 |
| chr11 | 100397083 | 100397267 |
| chr11 | 100397267 | 100397657 |
| chr11 | 100397657 | 100398028 |
| chr11 | 100398028 | 100398339 |
| chr11 | 100402720 | 100403077 |
| chr11 | 100406315 | 100406474 |
| chr11 | 100408136 | 100408581 |
| chr11 | 100411935 | 100412155 |

|       |           |           |
|-------|-----------|-----------|
| chr11 | 100414126 | 100414628 |
| chr11 | 100414628 | 100414935 |
| chr11 | 100414935 | 100415202 |
| chr11 | 100420390 | 100420622 |
| chr11 | 100420689 | 100420843 |
| chr11 | 100425620 | 100425843 |
| chr11 | 100425843 | 100426301 |
| chr11 | 100440575 | 100440956 |
| chr11 | 100440956 | 100441414 |
| chr11 | 100471976 | 100472347 |
| chr11 | 100472347 | 100472645 |
| chr11 | 100472645 | 100472939 |
| chr11 | 100472939 | 100473186 |
| chr11 | 100486209 | 100486447 |
| chr11 | 100491043 | 100491237 |
| chr11 | 100491291 | 100491447 |
| chr11 | 100493751 | 100494004 |
| chr11 | 100494092 | 100494337 |
| chr11 | 100503377 | 100503631 |
| chr11 | 100512425 | 100512759 |
| chr11 | 100525382 | 100525534 |
| chr11 | 100527033 | 100527461 |
| chr11 | 100527461 | 100527821 |
| chr11 | 100527821 | 100528410 |
| chr11 | 100528424 | 100528610 |
| chr11 | 100531307 | 100531547 |
| chr11 | 100535723 | 100535881 |
| chr11 | 100535955 | 100536380 |
| chr11 | 100536441 | 100536874 |
| chr11 | 100545281 | 100545492 |
| chr11 | 100545492 | 100545757 |
| chr11 | 100545757 | 100546004 |
| chr11 | 100555470 | 100555932 |
| chr11 | 100556104 | 100556284 |
| chr11 | 100569765 | 100570187 |
| chr11 | 100570253 | 100570468 |
| chr11 | 100570483 | 100570762 |
| chr11 | 100574209 | 100574419 |
| chr11 | 100574614 | 100575115 |
| chr11 | 100575115 | 100575476 |
| chr11 | 100619011 | 100619412 |
| chr11 | 100619412 | 100619778 |

|       |           |           |
|-------|-----------|-----------|
| chr11 | 100619778 | 100620032 |
| chr11 | 100620077 | 100620272 |
| chr11 | 100622699 | 100623251 |
| chr11 | 100626714 | 100626960 |
| chr11 | 100626960 | 100627218 |
| chr11 | 100640082 | 100640359 |
| chr11 | 100640359 | 100640615 |
| chr11 | 100646165 | 100646345 |
| chr11 | 100646345 | 100646738 |
| chr11 | 100651805 | 100652247 |
| chr11 | 100660009 | 100660264 |
| chr11 | 100661848 | 100662027 |
| chr11 | 100673206 | 100673436 |
| chr11 | 100680314 | 100680643 |
| chr11 | 100692430 | 100692587 |
| chr11 | 100694987 | 100695283 |
| chr11 | 100702150 | 100702434 |
| chr11 | 100702434 | 100702794 |
| chr11 | 100711739 | 100711927 |
| chr11 | 100711927 | 100712143 |
| chr11 | 100712143 | 100712355 |
| chr11 | 100712355 | 100712606 |
| chr11 | 100714622 | 100714897 |
| chr11 | 100720401 | 100720674 |
| chr11 | 100722313 | 100722676 |
| chr11 | 100722831 | 100723088 |
| chr11 | 100738041 | 100738735 |
| chr11 | 100745090 | 100745414 |
| chr11 | 100758896 | 100759122 |
| chr11 | 100759160 | 100759483 |
| chr11 | 100759511 | 100759859 |
| chr11 | 100759915 | 100760170 |
| chr11 | 100761538 | 100761776 |
| chr11 | 100761776 | 100762212 |
| chr11 | 100770134 | 100770502 |
| chr11 | 100770502 | 100770863 |
| chr11 | 100770863 | 100771118 |
| chr11 | 100771118 | 100771356 |
| chr11 | 100789740 | 100790114 |
| chr11 | 100795427 | 100795685 |
| chr11 | 100833443 | 100833823 |
| chr11 | 100850027 | 100850322 |

|       |           |           |
|-------|-----------|-----------|
| chr11 | 100850322 | 100850785 |
| chr11 | 100850785 | 100851198 |
| chr11 | 100851198 | 100851495 |
| chr11 | 100860075 | 100860905 |
| chr11 | 100867245 | 100867475 |
| chr11 | 100870693 | 100870878 |
| chr11 | 100886116 | 100886305 |
| chr11 | 100887300 | 100887689 |
| chr11 | 100887819 | 100887977 |
| chr11 | 100893452 | 100894104 |
| chr11 | 100900336 | 100900913 |
| chr11 | 100901995 | 100902200 |
| chr11 | 100908176 | 100908420 |
| chr11 | 100912810 | 100913106 |
| chr11 | 100924556 | 100924778 |
| chr11 | 100930763 | 100931111 |
| chr11 | 100931677 | 100931901 |
| chr11 | 100931958 | 100932175 |
| chr11 | 100938737 | 100938974 |
| chr11 | 100938985 | 100939652 |
| chr11 | 100939652 | 100940027 |
| chr11 | 100946995 | 100947161 |
| chr11 | 100947614 | 100947867 |
| chr11 | 100949646 | 100949800 |
| chr11 | 100955239 | 100955514 |
| chr11 | 100957303 | 100957466 |
| chr11 | 100960686 | 100961035 |
| chr11 | 100962258 | 100962727 |
| chr11 | 100962727 | 100962998 |
| chr11 | 100963760 | 100963957 |
| chr11 | 100967935 | 100968193 |
| chr11 | 100968935 | 100969085 |
| chr11 | 100969089 | 100969385 |
| chr11 | 100969385 | 100969624 |
| chr11 | 100969681 | 100969991 |
| chr11 | 100969991 | 100970438 |
| chr11 | 100970438 | 100970940 |
| chr11 | 100974380 | 100974662 |
| chr11 | 100979951 | 100980279 |
| chr11 | 100980539 | 100980772 |
| chr11 | 100983182 | 100983468 |
| chr11 | 100983468 | 100983734 |

|       |           |           |
|-------|-----------|-----------|
| chr11 | 100985721 | 100985920 |
| chr11 | 100993254 | 100993802 |
| chr11 | 100994150 | 100994307 |
| chr11 | 100995072 | 100995378 |
| chr11 | 100996578 | 100996840 |
| chr11 | 101001480 | 101001688 |
| chr11 | 101002957 | 101003438 |
| chr11 | 101008139 | 101008480 |
| chr11 | 101009232 | 101009583 |
| chr11 | 101009583 | 101009828 |
| chr11 | 101010071 | 101010338 |
| chr11 | 101010530 | 101010690 |
| chr11 | 101045393 | 101045674 |
| chr11 | 101052853 | 101053086 |
| chr11 | 101053086 | 101053303 |
| chr11 | 101053303 | 101053571 |
| chr11 | 101055529 | 101055772 |
| chr11 | 101056883 | 101057429 |
| chr11 | 101057925 | 101058189 |
| chr11 | 101060283 | 101060481 |
| chr11 | 101062353 | 101062748 |
| chr11 | 101063284 | 101063638 |
| chr11 | 101063656 | 101064029 |
| chr11 | 101064029 | 101064477 |
| chr11 | 101067109 | 101067288 |
| chr11 | 101069792 | 101070199 |
| chr11 | 101070199 | 101070420 |
| chr11 | 101070420 | 101070636 |
| chr11 | 101076818 | 101076981 |
| chr11 | 101082137 | 101082456 |
| chr11 | 101082456 | 101082854 |
| chr11 | 101082854 | 101083260 |
| chr11 | 101086886 | 101087046 |
| chr11 | 101087120 | 101087477 |
| chr11 | 101087477 | 101087792 |
| chr11 | 101087792 | 101088018 |
| chr11 | 101089922 | 101090155 |
| chr11 | 101094943 | 101095643 |
| chr11 | 101095643 | 101096069 |
| chr11 | 101111258 | 101111469 |
| chr11 | 101119479 | 101119717 |
| chr11 | 101119717 | 101119952 |

|       |           |           |
|-------|-----------|-----------|
| chr11 | 101119952 | 101120230 |
| chr11 | 101120230 | 101120504 |
| chr11 | 101128908 | 101129428 |
| chr11 | 101130009 | 101130215 |
| chr11 | 101138431 | 101138845 |
| chr11 | 101138845 | 101139224 |
| chr11 | 101140015 | 101140383 |
| chr11 | 101140383 | 101140815 |
| chr11 | 101142080 | 101142243 |
| chr11 | 101152735 | 101153249 |
| chr11 | 101155733 | 101155988 |
| chr11 | 101155988 | 101156224 |
| chr11 | 101162268 | 101162641 |
| chr11 | 101170320 | 101170637 |
| chr11 | 101170845 | 101171265 |
| chr11 | 101171265 | 101171706 |
| chr11 | 101171999 | 101172252 |
| chr11 | 101172252 | 101172431 |
| chr11 | 101173169 | 101173399 |
| chr11 | 101173602 | 101173802 |
| chr11 | 101173823 | 101174104 |
| chr11 | 101180880 | 101181113 |
| chr11 | 101189573 | 101189786 |
| chr11 | 101191513 | 101191686 |
| chr11 | 101201147 | 101201381 |
| chr11 | 101211951 | 101212286 |
| chr11 | 101221065 | 101221233 |
| chr11 | 101221350 | 101221501 |
| chr11 | 101225932 | 101226302 |
| chr11 | 101226302 | 101226600 |
| chr11 | 101226600 | 101226888 |
| chr11 | 101233283 | 101233460 |
| chr11 | 101236801 | 101237125 |
| chr11 | 101246038 | 101246353 |
| chr11 | 101246353 | 101246790 |
| chr11 | 101248707 | 101248913 |
| chr11 | 101252897 | 101253298 |
| chr11 | 101253366 | 101253584 |
| chr11 | 101253584 | 101253837 |
| chr11 | 101253837 | 101254309 |
| chr11 | 101254455 | 101254687 |
| chr11 | 101259914 | 101260109 |

|       |           |           |
|-------|-----------|-----------|
| chr11 | 101260109 | 101260371 |
| chr11 | 101260371 | 101260676 |
| chr11 | 101260676 | 101260919 |
| chr11 | 101260919 | 101261132 |
| chr11 | 101261132 | 101261312 |
| chr11 | 101269657 | 101270058 |
| chr11 | 101270800 | 101271119 |
| chr11 | 101277528 | 101277818 |
| chr11 | 101277818 | 101278219 |
| chr11 | 101278219 | 101278561 |
| chr11 | 101278624 | 101278860 |
| chr11 | 101278860 | 101279188 |
| chr11 | 101287351 | 101287659 |
| chr11 | 101301663 | 101301930 |
| chr11 | 101301930 | 101302149 |
| chr11 | 101302149 | 101302494 |
| chr11 | 101302525 | 101302683 |
| chr11 | 101307833 | 101308117 |
| chr11 | 101315665 | 101316080 |
| chr11 | 101316080 | 101316511 |
| chr11 | 101316511 | 101316942 |
| chr11 | 101323569 | 101323949 |
| chr11 | 101327385 | 101327581 |
| chr11 | 101328816 | 101329267 |
| chr11 | 101329387 | 101329562 |
| chr11 | 101335727 | 101336071 |
| chr11 | 101338236 | 101338386 |
| chr11 | 101338410 | 101338901 |
| chr11 | 101347151 | 101347366 |
| chr11 | 101351312 | 101351679 |
| chr11 | 101351679 | 101352009 |
| chr11 | 101362333 | 101362700 |
| chr11 | 101363201 | 101363356 |
| chr11 | 101363358 | 101363794 |
| chr11 | 101366632 | 101366818 |
| chr11 | 101386605 | 101386888 |
| chr11 | 101394868 | 101395140 |
| chr11 | 101395191 | 101395486 |
| chr11 | 101410606 | 101410822 |
| chr11 | 101415282 | 101415695 |
| chr11 | 101416505 | 101416742 |
| chr11 | 101416763 | 101417068 |

|       |           |           |
|-------|-----------|-----------|
| chr11 | 101417068 | 101417317 |
| chr11 | 101417317 | 101417535 |
| chr11 | 101417535 | 101417736 |
| chr11 | 101424248 | 101424424 |
| chr11 | 101424519 | 101424841 |
| chr11 | 101424888 | 101425225 |
| chr11 | 101425225 | 101425519 |
| chr11 | 101425519 | 101425805 |
| chr11 | 101433248 | 101433638 |
| chr11 | 101441930 | 101442501 |
| chr11 | 101442501 | 101442893 |
| chr11 | 101446354 | 101446566 |
| chr11 | 101448114 | 101448525 |
| chr11 | 101448525 | 101448803 |
| chr11 | 101448992 | 101449289 |
| chr11 | 101454438 | 101454617 |
| chr11 | 101455153 | 101455303 |
| chr11 | 101462971 | 101463280 |
| chr11 | 101464771 | 101465087 |
| chr11 | 101465087 | 101465573 |
| chr11 | 101465598 | 101465947 |
| chr11 | 101465953 | 101466412 |
| chr11 | 101467465 | 101467886 |
| chr11 | 101467886 | 101468351 |
| chr11 | 101484800 | 101484969 |
| chr11 | 101484969 | 101485126 |
| chr11 | 101493042 | 101493216 |
| chr11 | 101493216 | 101493391 |
| chr11 | 101494322 | 101494619 |
| chr11 | 101494652 | 101494803 |
| chr11 | 101507165 | 101507350 |
| chr11 | 101521280 | 101521545 |
| chr11 | 101536808 | 101536981 |
| chr11 | 101536981 | 101537083 |
| chr11 | 101540523 | 101540962 |
| chr11 | 101543634 | 101543863 |
| chr11 | 101551760 | 101552028 |
| chr11 | 101552028 | 101552233 |
| chr11 | 101552233 | 101552451 |
| chr11 | 101552471 | 101552898 |
| chr11 | 101552898 | 101553209 |
| chr11 | 101562326 | 101562799 |



|       |           |           |
|-------|-----------|-----------|
| chr11 | 101565230 | 101565380 |
| chr11 | 101568523 | 101568799 |
| chr11 | 101576174 | 101576487 |
| chr11 | 101581958 | 101582404 |
| chr11 | 101582532 | 101582692 |
| chr11 | 101589472 | 101589711 |
| chr11 | 101604493 | 101604750 |
| chr11 | 101604752 | 101605128 |
| chr11 | 101605128 | 101605717 |
| chr11 | 101614978 | 101615373 |
| chr11 | 101616166 | 101616410 |
| chr11 | 101616410 | 101616643 |
| chr11 | 101617084 | 101617320 |
| chr11 | 101617936 | 101618175 |
| chr11 | 101619977 | 101620421 |
| chr11 | 101620436 | 101620586 |
| chr11 | 101627017 | 101627209 |
| chr11 | 101627283 | 101627606 |
| chr11 | 101627606 | 101627940 |
| chr11 | 101627940 | 101628326 |
| chr11 | 101628326 | 101628656 |
| chr11 | 101628764 | 101628947 |
| chr11 | 101641695 | 101642020 |
| chr11 | 101642020 | 101642267 |
| chr11 | 101642267 | 101642739 |
| chr11 | 101644894 | 101645144 |
| chr11 | 101645146 | 101645424 |
| chr11 | 101645424 | 101645660 |
| chr11 | 101645660 | 101645977 |
| chr11 | 101658160 | 101658547 |
| chr11 | 101658547 | 101658824 |
| chr11 | 101658824 | 101659013 |
| chr11 | 101659013 | 101659174 |
| chr11 | 101659174 | 101659458 |
| chr11 | 101659458 | 101659749 |
| chr11 | 101659749 | 101659953 |
| chr11 | 101659953 | 101660206 |
| chr11 | 101665225 | 101665991 |
| chr11 | 101668219 | 101668500 |
| chr11 | 101680562 | 101680792 |
| chr11 | 101687720 | 101688409 |
| chr11 | 101700203 | 101700804 |

|       |           |           |
|-------|-----------|-----------|
| chr11 | 101700804 | 101701203 |
| chr11 | 101720080 | 101720506 |
| chr11 | 101732577 | 101732855 |
| chr11 | 101732855 | 101733129 |
| chr11 | 101733129 | 101733410 |
| chr11 | 101735015 | 101735299 |
| chr11 | 101739841 | 101740696 |
| chr11 | 101741148 | 101741325 |
| chr11 | 101756786 | 101756955 |
| chr11 | 101763764 | 101764176 |
| chr11 | 101772465 | 101772715 |
| chr11 | 101776856 | 101777347 |
| chr11 | 101783713 | 101783909 |
| chr11 | 101784258 | 101784448 |
| chr11 | 101784448 | 101784676 |
| chr11 | 101784676 | 101784901 |
| chr11 | 101784901 | 101785150 |
| chr11 | 101785150 | 101785547 |
| chr11 | 101785594 | 101785775 |
| chr11 | 101798052 | 101798215 |
| chr11 | 101798223 | 101798397 |
| chr11 | 101806894 | 101807052 |
| chr11 | 101807139 | 101807790 |
| chr11 | 101813321 | 101813570 |
| chr11 | 101814829 | 101815115 |
| chr11 | 101815152 | 101815310 |
| chr11 | 101830204 | 101830533 |
| chr11 | 101832680 | 101832853 |
| chr11 | 101839377 | 101839797 |
| chr11 | 101849099 | 101849757 |
| chr11 | 101874010 | 101874286 |
| chr11 | 101878801 | 101879088 |
| chr11 | 101885216 | 101885424 |
| chr11 | 101885784 | 101885960 |
| chr11 | 101905161 | 101905449 |
| chr11 | 101910147 | 101910566 |
| chr11 | 101912268 | 101912490 |
| chr11 | 101917949 | 101918212 |
| chr11 | 101918957 | 101919197 |
| chr11 | 101919696 | 101920072 |
| chr11 | 101928465 | 101928670 |
| chr11 | 101932921 | 101933274 |

|       |           |           |
|-------|-----------|-----------|
| chr11 | 101944877 | 101945071 |
| chr11 | 101958717 | 101958961 |
| chr11 | 101963751 | 101963988 |
| chr11 | 101963988 | 101964315 |
| chr11 | 101968384 | 101968574 |
| chr11 | 101968738 | 101969161 |
| chr11 | 101971512 | 101971691 |
| chr11 | 101984071 | 101984576 |
| chr11 | 101984576 | 101985115 |
| chr11 | 101986081 | 101986289 |
| chr11 | 101997973 | 101998427 |
| chr11 | 101999477 | 101999709 |
| chr11 | 102026632 | 102027117 |
| chr11 | 102027117 | 102027415 |
| chr11 | 102027716 | 102028082 |
| chr11 | 102031284 | 102031517 |
| chr11 | 102038619 | 102038769 |
| chr11 | 102039583 | 102039828 |
| chr11 | 102040161 | 102040559 |
| chr11 | 102053966 | 102054147 |
| chr11 | 102061216 | 102061650 |
| chr11 | 102069064 | 102069225 |
| chr11 | 102082380 | 102082752 |
| chr11 | 102083278 | 102083498 |
| chr11 | 102086956 | 102087525 |
| chr11 | 102087525 | 102087804 |
| chr11 | 102087804 | 102088026 |
| chr11 | 102088046 | 102088334 |
| chr11 | 102088369 | 102088676 |
| chr11 | 102089160 | 102089359 |
| chr11 | 102096810 | 102097376 |
| chr11 | 102102570 | 102102817 |
| chr11 | 102107112 | 102107359 |
| chr11 | 102110360 | 102110667 |
| chr11 | 102110667 | 102111005 |
| chr11 | 102111712 | 102111886 |
| chr11 | 102127677 | 102128069 |
| chr11 | 102131450 | 102131717 |
| chr11 | 102138267 | 102138429 |
| chr11 | 102138459 | 102138766 |
| chr11 | 102140590 | 102140834 |
| chr11 | 102145389 | 102145594 |

|       |           |           |
|-------|-----------|-----------|
| chr11 | 102145594 | 102145834 |
| chr11 | 102145834 | 102146137 |
| chr11 | 102147427 | 102147577 |
| chr11 | 102148524 | 102148681 |
| chr11 | 102155681 | 102155925 |
| chr11 | 102156055 | 102156527 |
| chr11 | 102156527 | 102156822 |
| chr11 | 102184488 | 102184856 |
| chr11 | 102184856 | 102185137 |
| chr11 | 102185137 | 102185482 |
| chr11 | 102189505 | 102189771 |
| chr11 | 102189771 | 102190004 |
| chr11 | 102190004 | 102190202 |
| chr11 | 102190216 | 102190400 |
| chr11 | 102198337 | 102198507 |
| chr11 | 102201241 | 102201606 |
| chr11 | 102201606 | 102201890 |
| chr11 | 102208771 | 102209357 |
| chr11 | 102209793 | 102210095 |
| chr11 | 102216037 | 102216347 |
| chr11 | 102216347 | 102216567 |
| chr11 | 102216636 | 102216920 |
| chr11 | 102216920 | 102217208 |
| chr11 | 102218615 | 102218820 |
| chr11 | 102218820 | 102219200 |
| chr11 | 102223221 | 102223462 |
| chr11 | 102224739 | 102224951 |
| chr11 | 102225258 | 102225465 |
| chr11 | 102229344 | 102229548 |
| chr11 | 102229691 | 102230091 |
| chr11 | 102230091 | 102230405 |
| chr11 | 102230405 | 102230615 |
| chr11 | 102238183 | 102238593 |
| chr11 | 102244898 | 102245506 |
| chr11 | 102248633 | 102248829 |
| chr11 | 102248829 | 102249009 |
| chr11 | 102249009 | 102249500 |
| chr11 | 102257582 | 102257739 |
| chr11 | 102258615 | 102258797 |
| chr11 | 102267360 | 102267806 |
| chr11 | 102275519 | 102275791 |
| chr11 | 102276338 | 102276870 |

|       |           |           |
|-------|-----------|-----------|
| chr11 | 102284496 | 102284786 |
| chr11 | 102284786 | 102285045 |
| chr11 | 102285045 | 102285596 |
| chr11 | 102295290 | 102295591 |
| chr11 | 102295591 | 102295782 |
| chr11 | 102295875 | 102296286 |
| chr11 | 102296319 | 102296516 |
| chr11 | 102296524 | 102296931 |
| chr11 | 102296931 | 102297365 |
| chr11 | 102297365 | 102297619 |
| chr11 | 102297619 | 102297781 |
| chr11 | 102308908 | 102309385 |
| chr11 | 102309385 | 102309744 |
| chr11 | 102309909 | 102310170 |
| chr11 | 102316584 | 102317123 |
| chr11 | 102317123 | 102317563 |
| chr11 | 102317563 | 102317910 |
| chr11 | 102317910 | 102318210 |
| chr11 | 102318210 | 102318544 |
| chr11 | 102318681 | 102318833 |
| chr11 | 102318925 | 102319150 |
| chr11 | 102319339 | 102319714 |
| chr11 | 102320279 | 102320474 |
| chr11 | 102323625 | 102323875 |
| chr11 | 102327245 | 102327602 |
| chr11 | 102327962 | 102328115 |
| chr11 | 102338560 | 102338908 |
| chr11 | 102338908 | 102339138 |
| chr11 | 102344643 | 102344802 |
| chr11 | 102346913 | 102347360 |
| chr11 | 102351443 | 102351798 |
| chr11 | 102358352 | 102358540 |
| chr11 | 102365088 | 102365283 |
| chr11 | 102375303 | 102375577 |
| chr11 | 102375591 | 102375829 |
| chr11 | 102375829 | 102376154 |
| chr11 | 102376531 | 102376809 |
| chr11 | 102382865 | 102383316 |
| chr11 | 102383316 | 102383732 |
| chr11 | 102384540 | 102384765 |
| chr11 | 102391538 | 102391758 |
| chr11 | 102393210 | 102393622 |

|       |           |           |
|-------|-----------|-----------|
| chr11 | 102393994 | 102394144 |
| chr11 | 102394192 | 102394411 |
| chr11 | 102394411 | 102394722 |
| chr11 | 102398520 | 102398759 |
| chr11 | 102407039 | 102407312 |
| chr11 | 102407312 | 102407600 |
| chr11 | 102407600 | 102407892 |
| chr11 | 102407926 | 102408130 |
| chr11 | 102408344 | 102408643 |
| chr11 | 102408643 | 102408900 |
| chr11 | 102411761 | 102412024 |
| chr11 | 102415100 | 102415299 |
| chr11 | 102417367 | 102417544 |
| chr11 | 102418920 | 102419204 |
| chr11 | 102424646 | 102425230 |
| chr11 | 102430090 | 102430642 |
| chr11 | 102430788 | 102431030 |
| chr11 | 102431036 | 102431321 |
| chr11 | 102434469 | 102434737 |
| chr11 | 102436446 | 102436723 |
| chr11 | 102445344 | 102445791 |
| chr11 | 102445791 | 102446275 |
| chr11 | 102446381 | 102446577 |
| chr11 | 102446577 | 102446812 |
| chr11 | 102446843 | 102447184 |
| chr11 | 102447240 | 102447476 |
| chr11 | 102447476 | 102447825 |
| chr11 | 102455655 | 102456036 |
| chr11 | 102456036 | 102456531 |
| chr11 | 102465986 | 102466502 |
| chr11 | 102466866 | 102467328 |
| chr11 | 102467328 | 102467664 |
| chr11 | 102487054 | 102487348 |
| chr11 | 102496287 | 102496575 |
| chr11 | 102536248 | 102536551 |
| chr11 | 102555627 | 102555841 |
| chr11 | 102555841 | 102556064 |
| chr11 | 102556064 | 102556255 |
| chr11 | 102556255 | 102556595 |
| chr11 | 102565199 | 102565559 |
| chr11 | 102568837 | 102569053 |
| chr11 | 102572860 | 102573136 |

|       |           |           |
|-------|-----------|-----------|
| chr11 | 102576112 | 102576400 |
| chr11 | 102576482 | 102576726 |
| chr11 | 102578604 | 102579046 |
| chr11 | 102582354 | 102582616 |
| chr11 | 102586512 | 102586681 |
| chr11 | 102603627 | 102603808 |
| chr11 | 102604025 | 102604535 |
| chr11 | 102604535 | 102604925 |
| chr11 | 102604925 | 102605157 |
| chr11 | 102605157 | 102605427 |
| chr11 | 102623344 | 102623584 |
| chr11 | 102630285 | 102630683 |
| chr11 | 102633511 | 102633749 |
| chr11 | 102635398 | 102635583 |
| chr11 | 102643701 | 102644187 |
| chr11 | 102644187 | 102644563 |
| chr11 | 102651507 | 102651661 |
| chr11 | 102654445 | 102654628 |
| chr11 | 102654806 | 102655002 |
| chr11 | 102655499 | 102656395 |
| chr11 | 102656419 | 102656603 |
| chr11 | 102656603 | 102656801 |
| chr11 | 102690258 | 102690541 |
| chr11 | 102697243 | 102697402 |
| chr11 | 102697419 | 102697883 |
| chr11 | 102697883 | 102698348 |
| chr11 | 102714092 | 102714331 |
| chr11 | 102714667 | 102714850 |
| chr11 | 102720472 | 102720767 |
| chr11 | 102725671 | 102726067 |
| chr11 | 102728569 | 102729066 |
| chr11 | 102729682 | 102730320 |
| chr11 | 102735059 | 102735275 |
| chr11 | 102739166 | 102739504 |
| chr11 | 102739504 | 102739835 |
| chr11 | 102749500 | 102749798 |
| chr11 | 102749798 | 102750141 |
| chr11 | 102761365 | 102761727 |
| chr11 | 102761727 | 102762012 |
| chr11 | 102762012 | 102762287 |
| chr11 | 102767083 | 102767459 |
| chr11 | 102767491 | 102767652 |

|       |           |           |
|-------|-----------|-----------|
| chr11 | 102773905 | 102774182 |
| chr11 | 102774182 | 102774395 |
| chr11 | 102774395 | 102774600 |
| chr11 | 102774615 | 102775166 |
| chr11 | 102783158 | 102783470 |
| chr11 | 102783470 | 102783695 |
| chr11 | 102783842 | 102784070 |
| chr11 | 102788434 | 102788598 |
| chr11 | 102810724 | 102811007 |
| chr11 | 102811212 | 102811407 |
| chr11 | 102818528 | 102818970 |
| chr11 | 102818970 | 102819353 |
| chr11 | 102819353 | 102819775 |
| chr11 | 102821332 | 102821527 |
| chr11 | 102832380 | 102832622 |
| chr11 | 102832814 | 102833047 |
| chr11 | 102833047 | 102833299 |
| chr11 | 102846683 | 102846870 |
| chr11 | 102851912 | 102852218 |
| chr11 | 102853832 | 102854095 |
| chr11 | 102864373 | 102864584 |
| chr11 | 102865196 | 102865346 |
| chr11 | 102880513 | 102880814 |
| chr11 | 102880814 | 102881111 |
| chr11 | 102881122 | 102881448 |
| chr11 | 102881448 | 102881894 |
| chr11 | 102888032 | 102888304 |
| chr11 | 102889784 | 102889958 |
| chr11 | 102892948 | 102893281 |
| chr11 | 102894613 | 102895091 |
| chr11 | 102900645 | 102901089 |
| chr11 | 102901089 | 102901323 |
| chr11 | 102901323 | 102901521 |
| chr11 | 102909972 | 102910160 |
| chr11 | 102924491 | 102924744 |
| chr11 | 102924744 | 102925012 |
| chr11 | 102925012 | 102925348 |
| chr11 | 102925348 | 102925691 |
| chr11 | 102946191 | 102946351 |
| chr11 | 102946438 | 102947089 |
| chr11 | 102948501 | 102948788 |
| chr11 | 102948788 | 102949023 |



|       |           |           |
|-------|-----------|-----------|
| chr11 | 102955735 | 102955926 |
| chr11 | 102958480 | 102958862 |
| chr11 | 102959049 | 102959197 |
| chr11 | 102959197 | 102959368 |
| chr11 | 102964634 | 102964818 |
| chr11 | 102964818 | 102964994 |
| chr11 | 102966923 | 102967073 |
| chr11 | 102978154 | 102978346 |
| chr11 | 102978389 | 102978608 |
| chr11 | 102980991 | 102981229 |
| chr11 | 102983870 | 102984047 |
| chr11 | 102990165 | 102990466 |
| chr11 | 102992977 | 102993317 |
| chr11 | 102996218 | 102996914 |
| chr11 | 102996985 | 102997244 |
| chr11 | 103003086 | 103003783 |
| chr11 | 103008583 | 103008893 |
| chr11 | 103009354 | 103009608 |
| chr11 | 103016898 | 103017333 |
| chr11 | 103022240 | 103022412 |
| chr11 | 103022558 | 103022720 |
| chr11 | 103027952 | 103028207 |
| chr11 | 103028207 | 103028440 |
| chr11 | 103028440 | 103028663 |
| chr11 | 103028663 | 103028960 |
| chr11 | 103037645 | 103037852 |
| chr11 | 103050296 | 103050567 |
| chr11 | 103051263 | 103051812 |
| chr11 | 103051997 | 103052167 |
| chr11 | 103056518 | 103057208 |
| chr11 | 103066705 | 103066954 |
| chr11 | 103067018 | 103067195 |
| chr11 | 103067219 | 103067752 |
| chr11 | 103072628 | 103072836 |
| chr11 | 103093860 | 103094278 |
| chr11 | 103094280 | 103095014 |
| chr11 | 103097034 | 103097260 |
| chr11 | 103097298 | 103097760 |
| chr11 | 103099961 | 103100234 |
| chr11 | 103100300 | 103100571 |
| chr11 | 103101535 | 103101824 |
| chr11 | 103101992 | 103102201 |

|       |           |           |
|-------|-----------|-----------|
| chr11 | 103102201 | 103102426 |
| chr11 | 103102652 | 103103231 |
| chr11 | 103115260 | 103115617 |
| chr11 | 103115864 | 103116186 |
| chr11 | 103116186 | 103116675 |
| chr11 | 103116936 | 103117356 |
| chr11 | 103132210 | 103132667 |
| chr11 | 103132667 | 103133135 |
| chr11 | 103133135 | 103133483 |
| chr11 | 103134309 | 103134612 |
| chr11 | 103134706 | 103134885 |
| chr11 | 103140453 | 103140905 |
| chr11 | 103140905 | 103141338 |
| chr11 | 103141338 | 103141572 |
| chr11 | 103141572 | 103141783 |
| chr11 | 103142431 | 103142590 |
| chr11 | 103142763 | 103142913 |
| chr11 | 103144363 | 103144545 |
| chr11 | 103150263 | 103150432 |
| chr11 | 103158570 | 103158857 |
| chr11 | 103158857 | 103159101 |
| chr11 | 103159101 | 103159379 |
| chr11 | 103168625 | 103168984 |
| chr11 | 103171036 | 103171220 |
| chr11 | 103174294 | 103174768 |
| chr11 | 103174768 | 103175349 |
| chr11 | 103184975 | 103185223 |
| chr11 | 103193098 | 103193281 |
| chr11 | 103193438 | 103193766 |
| chr11 | 103195422 | 103195578 |
| chr11 | 103199392 | 103199857 |
| chr11 | 103201387 | 103201708 |
| chr11 | 103201710 | 103201966 |
| chr11 | 103210142 | 103210311 |
| chr11 | 103217778 | 103218075 |
| chr11 | 103218146 | 103218511 |
| chr11 | 103218511 | 103218789 |
| chr11 | 103232995 | 103233295 |
| chr11 | 103234250 | 103234437 |
| chr11 | 103235697 | 103236054 |
| chr11 | 103237859 | 103238064 |
| chr11 | 103246123 | 103246758 |

|       |           |           |
|-------|-----------|-----------|
| chr11 | 103246758 | 103247243 |
| chr11 | 103247567 | 103247735 |
| chr11 | 103257996 | 103258389 |
| chr11 | 103262083 | 103262386 |
| chr11 | 103262386 | 103262689 |
| chr11 | 103266899 | 103267299 |
| chr11 | 103267299 | 103267937 |
| chr11 | 103267952 | 103268131 |
| chr11 | 103272978 | 103273227 |
| chr11 | 103273438 | 103273669 |
| chr11 | 103281895 | 103282273 |
| chr11 | 103307123 | 103307370 |
| chr11 | 103311904 | 103312643 |
| chr11 | 103322850 | 103323172 |
| chr11 | 103325257 | 103325570 |
| chr11 | 103326991 | 103327265 |
| chr11 | 103332512 | 103333057 |
| chr11 | 103334039 | 103334296 |
| chr11 | 103340637 | 103341113 |
| chr11 | 103346353 | 103346597 |
| chr11 | 103346705 | 103347124 |
| chr11 | 103350733 | 103351484 |
| chr11 | 103360270 | 103360615 |
| chr11 | 103361420 | 103361762 |
| chr11 | 103361794 | 103361971 |
| chr11 | 103362074 | 103362413 |
| chr11 | 103362570 | 103362916 |
| chr11 | 103362916 | 103363313 |
| chr11 | 103363313 | 103363756 |
| chr11 | 103365528 | 103365728 |
| chr11 | 103371041 | 103371625 |
| chr11 | 103372661 | 103372870 |
| chr11 | 103373061 | 103373229 |
| chr11 | 103375029 | 103375242 |
| chr11 | 103378081 | 103378585 |
| chr11 | 103378585 | 103378846 |
| chr11 | 103381992 | 103382213 |
| chr11 | 103382213 | 103382339 |
| chr11 | 103382339 | 103382717 |
| chr11 | 103383628 | 103383828 |
| chr11 | 103385656 | 103385819 |
| chr11 | 103386823 | 103387185 |

|       |           |           |
|-------|-----------|-----------|
| chr11 | 103387335 | 103387758 |
| chr11 | 103387758 | 103388194 |
| chr11 | 103388247 | 103388502 |
| chr11 | 103394044 | 103394417 |
| chr11 | 103394577 | 103394823 |
| chr11 | 103396698 | 103397237 |
| chr11 | 103399134 | 103399363 |
| chr11 | 103400105 | 103400385 |
| chr11 | 103402247 | 103402727 |
| chr11 | 103406621 | 103406923 |
| chr11 | 103407221 | 103407504 |
| chr11 | 103410998 | 103411255 |
| chr11 | 103411405 | 103411588 |
| chr11 | 103412208 | 103412635 |
| chr11 | 103412635 | 103412953 |
| chr11 | 103412953 | 103413232 |
| chr11 | 103413245 | 103413451 |
| chr11 | 103418588 | 103418753 |
| chr11 | 103424283 | 103424616 |
| chr11 | 103443825 | 103444073 |
| chr11 | 103449775 | 103449976 |
| chr11 | 103464358 | 103464775 |
| chr11 | 103468351 | 103468568 |
| chr11 | 103497945 | 103498141 |
| chr11 | 103530716 | 103530878 |
| chr11 | 103578517 | 103578668 |
| chr11 | 103638877 | 103639027 |
| chr11 | 103639462 | 103639691 |
| chr11 | 103649246 | 103649453 |
| chr11 | 103649462 | 103649614 |
| chr11 | 103649738 | 103649948 |
| chr11 | 103650052 | 103650292 |
| chr11 | 103656609 | 103656838 |
| chr11 | 103673815 | 103674015 |
| chr11 | 103675630 | 103675885 |
| chr11 | 103675885 | 103676049 |
| chr11 | 103677060 | 103677371 |
| chr11 | 103678572 | 103678828 |
| chr11 | 103683732 | 103684077 |
| chr11 | 103684835 | 103685034 |
| chr11 | 103685151 | 103685803 |
| chr11 | 103689103 | 103689386 |

|       |           |           |
|-------|-----------|-----------|
| chr11 | 103697201 | 103697565 |
| chr11 | 103697565 | 103697853 |
| chr11 | 103697853 | 103698225 |
| chr11 | 103700252 | 103700587 |
| chr11 | 103721505 | 103721657 |
| chr11 | 103733134 | 103733428 |
| chr11 | 103749345 | 103749537 |
| chr11 | 103749603 | 103750168 |
| chr11 | 103758796 | 103759075 |
| chr11 | 103763801 | 103764037 |
| chr11 | 103764037 | 103764237 |
| chr11 | 103764647 | 103764809 |
| chr11 | 103766058 | 103766260 |
| chr11 | 103772671 | 103772830 |
| chr11 | 103773515 | 103773684 |
| chr11 | 103773906 | 103774150 |
| chr11 | 103774274 | 103774473 |
| chr11 | 103780250 | 103780507 |
| chr11 | 103790099 | 103790309 |
| chr11 | 103798737 | 103798934 |
| chr11 | 103800976 | 103801562 |
| chr11 | 103801596 | 103801746 |
| chr11 | 103809719 | 103810014 |
| chr11 | 103810014 | 103810296 |
| chr11 | 103810296 | 103810564 |
| chr11 | 103810564 | 103810756 |
| chr11 | 103836671 | 103836928 |
| chr11 | 103839068 | 103839379 |
| chr11 | 103849411 | 103849647 |
| chr11 | 103879532 | 103879755 |
| chr11 | 103953139 | 103953432 |
| chr11 | 103953432 | 103953813 |
| chr11 | 103953813 | 103954277 |
| chr11 | 103961299 | 103961693 |
| chr11 | 103961693 | 103961944 |
| chr11 | 103966241 | 103966767 |
| chr11 | 103966767 | 103967143 |
| chr11 | 103967240 | 103967493 |
| chr11 | 103967493 | 103967783 |
| chr11 | 103984405 | 103984582 |
| chr11 | 103987438 | 103987729 |
| chr11 | 103990125 | 103990600 |

|       |           |           |
|-------|-----------|-----------|
| chr11 | 103997462 | 103997690 |
| chr11 | 104017584 | 104017846 |
| chr11 | 104043164 | 104043370 |
| chr11 | 104055941 | 104056301 |
| chr11 | 104057230 | 104057429 |
| chr11 | 104072738 | 104072894 |
| chr11 | 104072897 | 104073134 |
| chr11 | 104083873 | 104084027 |
| chr11 | 104114731 | 104115074 |
| chr11 | 104118324 | 104118622 |
| chr11 | 104131860 | 104132073 |
| chr11 | 104157924 | 104158252 |
| chr11 | 104171572 | 104171820 |
| chr11 | 104186171 | 104186324 |
| chr11 | 104195727 | 104196192 |
| chr11 | 104221777 | 104222074 |
| chr11 | 104224625 | 104224888 |
| chr11 | 104230964 | 104231881 |
| chr11 | 104232264 | 104232496 |
| chr11 | 104237264 | 104237451 |
| chr11 | 104246207 | 104246417 |
| chr11 | 104278274 | 104278624 |
| chr11 | 104279595 | 104279912 |
| chr11 | 104288896 | 104289139 |
| chr11 | 104289139 | 104289447 |
| chr11 | 104289447 | 104289774 |
| chr11 | 104289774 | 104290203 |
| chr11 | 104295755 | 104295985 |
| chr11 | 104299230 | 104299440 |
| chr11 | 104303380 | 104303641 |
| chr11 | 104303641 | 104303937 |
| chr11 | 104309814 | 104309964 |
| chr11 | 104310462 | 104310795 |
| chr11 | 104315785 | 104316017 |
| chr11 | 104318943 | 104319445 |
| chr11 | 104319445 | 104319793 |
| chr11 | 104325513 | 104325716 |
| chr11 | 104329254 | 104329451 |
| chr11 | 104339561 | 104339768 |
| chr11 | 104361596 | 104362207 |
| chr11 | 104363711 | 104363958 |
| chr11 | 104363958 | 104364218 |

|       |           |           |
|-------|-----------|-----------|
| chr11 | 104364218 | 104364513 |
| chr11 | 104379717 | 104379872 |
| chr11 | 104383496 | 104383708 |
| chr11 | 104412303 | 104412619 |
| chr11 | 104435192 | 104435488 |
| chr11 | 104441602 | 104441903 |
| chr11 | 104441903 | 104442219 |
| chr11 | 104442219 | 104442640 |
| chr11 | 104442640 | 104443122 |
| chr11 | 104448535 | 104448899 |
| chr11 | 104461710 | 104461861 |
| chr11 | 104466988 | 104467196 |
| chr11 | 104468847 | 104469263 |
| chr11 | 104469263 | 104469828 |
| chr11 | 104492172 | 104492416 |
| chr11 | 104510701 | 104510852 |
| chr11 | 104549511 | 104549661 |
| chr11 | 104549976 | 104550350 |
| chr11 | 104550350 | 104550629 |
| chr11 | 104550629 | 104551012 |
| chr11 | 104561051 | 104561338 |
| chr11 | 104571478 | 104571764 |
| chr11 | 104590003 | 104590587 |
| chr11 | 104604212 | 104604378 |
| chr11 | 104604431 | 104604631 |
| chr11 | 104606577 | 104606761 |
| chr11 | 104607643 | 104607924 |
| chr11 | 104607924 | 104608734 |
| chr11 | 104611610 | 104611967 |
| chr11 | 104614234 | 104614448 |
| chr11 | 104615623 | 104615790 |
| chr11 | 104617850 | 104618165 |
| chr11 | 104618521 | 104618909 |
| chr11 | 104619454 | 104619868 |
| chr11 | 104622581 | 104622849 |
| chr11 | 104624619 | 104625107 |
| chr11 | 104625107 | 104625517 |
| chr11 | 104625517 | 104625815 |
| chr11 | 104630230 | 104630590 |
| chr11 | 104631178 | 104631737 |
| chr11 | 104638859 | 104639333 |
| chr11 | 104639456 | 104639606 |

|       |           |           |
|-------|-----------|-----------|
| chr11 | 104640901 | 104641215 |
| chr11 | 104648607 | 104648881 |
| chr11 | 104667750 | 104668129 |
| chr11 | 104673762 | 104673912 |
| chr11 | 104688312 | 104688770 |
| chr11 | 104692220 | 104692468 |
| chr11 | 104692468 | 104692823 |
| chr11 | 104721007 | 104721297 |
| chr11 | 104732711 | 104732919 |
| chr11 | 104748808 | 104749137 |
| chr11 | 104768149 | 104768368 |
| chr11 | 104789948 | 104790246 |
| chr11 | 104852004 | 104852177 |
| chr11 | 104856288 | 104856538 |
| chr11 | 104872814 | 104872975 |
| chr11 | 104912667 | 104912817 |
| chr11 | 104942941 | 104943192 |
| chr11 | 104952338 | 104952931 |
| chr11 | 104953046 | 104953303 |
| chr11 | 104975008 | 104975164 |
| chr11 | 105021130 | 105021406 |
| chr11 | 105028868 | 105029532 |
| chr11 | 105034989 | 105035410 |
| chr11 | 105066507 | 105066657 |
| chr11 | 105066660 | 105066938 |
| chr11 | 105112444 | 105112821 |
| chr11 | 105120521 | 105120984 |
| chr11 | 105123998 | 105124336 |
| chr11 | 105125693 | 105125933 |
| chr11 | 105126017 | 105126379 |
| chr11 | 105126379 | 105126619 |
| chr11 | 105126622 | 105126790 |
| chr11 | 105126790 | 105126968 |
| chr11 | 105128900 | 105129062 |
| chr11 | 105145232 | 105145438 |
| chr11 | 105150234 | 105150543 |
| chr11 | 105153259 | 105153646 |
| chr11 | 105154298 | 105154567 |
| chr11 | 105159754 | 105160035 |
| chr11 | 105160035 | 105160355 |
| chr11 | 105180623 | 105180825 |
| chr11 | 105180825 | 105181097 |



|       |           |           |
|-------|-----------|-----------|
| chr11 | 105181097 | 105181449 |
| chr11 | 105181449 | 105181773 |
| chr11 | 105181773 | 105182104 |
| chr11 | 105182104 | 105182393 |
| chr11 | 105189250 | 105189456 |
| chr11 | 105195825 | 105196336 |
| chr11 | 105196339 | 105196489 |
| chr11 | 105210049 | 105210334 |
| chr11 | 105265057 | 105265300 |
| chr11 | 105270228 | 105270385 |
| chr11 | 105289142 | 105289385 |
| chr11 | 105292161 | 105292511 |
| chr11 | 105292511 | 105292979 |
| chr11 | 105315390 | 105315543 |
| chr11 | 105330077 | 105330337 |
| chr11 | 105331802 | 105332130 |
| chr11 | 105332540 | 105332779 |
| chr11 | 105340102 | 105340357 |
| chr11 | 105345360 | 105345608 |
| chr11 | 105347609 | 105347864 |
| chr11 | 105347864 | 105348149 |
| chr11 | 105361911 | 105362640 |
| chr11 | 105362742 | 105363347 |
| chr11 | 105402264 | 105402767 |
| chr11 | 105402852 | 105403148 |
| chr11 | 105403260 | 105403482 |
| chr11 | 105408796 | 105409167 |
| chr11 | 105409167 | 105409402 |
| chr11 | 105424651 | 105425143 |
| chr11 | 105439828 | 105440125 |
| chr11 | 105441858 | 105442187 |
| chr11 | 105443552 | 105443802 |
| chr11 | 105448918 | 105449190 |
| chr11 | 105449544 | 105449944 |
| chr11 | 105449944 | 105450309 |
| chr11 | 105451433 | 105451645 |
| chr11 | 105451654 | 105452026 |
| chr11 | 105453471 | 105453787 |
| chr11 | 105460011 | 105460231 |
| chr11 | 105467285 | 105467573 |
| chr11 | 105507961 | 105508175 |
| chr11 | 105525640 | 105525790 |

|       |           |           |
|-------|-----------|-----------|
| chr11 | 105530961 | 105531129 |
| chr11 | 105570729 | 105570887 |
| chr11 | 105589205 | 105589568 |
| chr11 | 105589568 | 105589876 |
| chr11 | 105589876 | 105590138 |
| chr11 | 105590138 | 105590444 |
| chr11 | 105592006 | 105592216 |
| chr11 | 105625864 | 105626095 |
| chr11 | 105666915 | 105667160 |
| chr11 | 105743249 | 105743491 |
| chr11 | 105823189 | 105823608 |
| chr11 | 105823815 | 105824160 |
| chr11 | 105867835 | 105868136 |
| chr11 | 105883538 | 105883769 |
| chr11 | 105883769 | 105884041 |
| chr11 | 105884041 | 105884291 |
| chr11 | 105899215 | 105899576 |
| chr11 | 105899629 | 105899894 |
| chr11 | 105901343 | 105901985 |
| chr11 | 105905532 | 105905874 |
| chr11 | 105907441 | 105907803 |
| chr11 | 105911647 | 105911943 |
| chr11 | 105912042 | 105912333 |
| chr11 | 105920938 | 105921092 |
| chr11 | 105927088 | 105927479 |
| chr11 | 105927574 | 105927935 |
| chr11 | 105934279 | 105934507 |
| chr11 | 105936819 | 105937132 |
| chr11 | 105943183 | 105943442 |
| chr11 | 105943479 | 105943817 |
| chr11 | 105943817 | 105944124 |
| chr11 | 105944124 | 105944368 |
| chr11 | 105944368 | 105944679 |
| chr11 | 105946972 | 105947165 |
| chr11 | 105948270 | 105948556 |
| chr11 | 105950609 | 105950827 |
| chr11 | 105952952 | 105953141 |
| chr11 | 105953141 | 105953421 |
| chr11 | 105953421 | 105953894 |
| chr11 | 105958662 | 105958838 |
| chr11 | 105964878 | 105965028 |
| chr11 | 105967551 | 105967792 |

|       |           |           |
|-------|-----------|-----------|
| chr11 | 105967792 | 105968088 |
| chr11 | 105968088 | 105968568 |
| chr11 | 105969456 | 105969665 |
| chr11 | 105969665 | 105969884 |
| chr11 | 105975055 | 105975240 |
| chr11 | 105986828 | 105986978 |
| chr11 | 105989476 | 105989703 |
| chr11 | 106001851 | 106002021 |
| chr11 | 106005459 | 106005702 |
| chr11 | 106007854 | 106008290 |
| chr11 | 106012715 | 106012886 |
| chr11 | 106017258 | 106017525 |
| chr11 | 106020018 | 106020360 |
| chr11 | 106020360 | 106020854 |
| chr11 | 106026591 | 106026747 |
| chr11 | 106026750 | 106027074 |
| chr11 | 106031900 | 106032155 |
| chr11 | 106032155 | 106032428 |
| chr11 | 106033356 | 106033634 |
| chr11 | 106036545 | 106036978 |
| chr11 | 106036978 | 106037406 |
| chr11 | 106037464 | 106037796 |
| chr11 | 106060639 | 106060874 |
| chr11 | 106061353 | 106061780 |
| chr11 | 106065789 | 106066020 |
| chr11 | 106066020 | 106066226 |
| chr11 | 106066226 | 106066800 |
| chr11 | 106076359 | 106076677 |
| chr11 | 106083808 | 106084109 |
| chr11 | 106084109 | 106084650 |
| chr11 | 106084650 | 106085139 |
| chr11 | 106101610 | 106102068 |
| chr11 | 106125852 | 106126158 |
| chr11 | 106135273 | 106135455 |
| chr11 | 106142021 | 106142242 |
| chr11 | 106151112 | 106151263 |
| chr11 | 106152292 | 106152450 |
| chr11 | 106158141 | 106158371 |
| chr11 | 106158961 | 106159559 |
| chr11 | 106159559 | 106159981 |
| chr11 | 106159981 | 106160392 |
| chr11 | 106160392 | 106160705 |

|       |           |           |
|-------|-----------|-----------|
| chr11 | 106165561 | 106166049 |
| chr11 | 106167510 | 106167693 |
| chr11 | 106170875 | 106171128 |
| chr11 | 106178126 | 106178432 |
| chr11 | 106178507 | 106178906 |
| chr11 | 106179724 | 106180041 |
| chr11 | 106180137 | 106180459 |
| chr11 | 106192993 | 106193152 |
| chr11 | 106193156 | 106193398 |
| chr11 | 106193398 | 106193637 |
| chr11 | 106193637 | 106193989 |
| chr11 | 106195324 | 106195756 |
| chr11 | 106215977 | 106216293 |
| chr11 | 106216293 | 106216654 |
| chr11 | 106216690 | 106216904 |
| chr11 | 106216904 | 106217153 |
| chr11 | 106217153 | 106217455 |
| chr11 | 106234064 | 106234267 |
| chr11 | 106246920 | 106247148 |
| chr11 | 106255226 | 106255478 |
| chr11 | 106255488 | 106255714 |
| chr11 | 106255714 | 106255948 |
| chr11 | 106255970 | 106256248 |
| chr11 | 106256248 | 106256620 |
| chr11 | 106272254 | 106272757 |
| chr11 | 106272757 | 106273310 |
| chr11 | 106276485 | 106276792 |
| chr11 | 106282518 | 106282772 |
| chr11 | 106284016 | 106284266 |
| chr11 | 106284266 | 106284562 |
| chr11 | 106286899 | 106287120 |
| chr11 | 106289431 | 106289701 |
| chr11 | 106302523 | 106302716 |
| chr11 | 106302716 | 106302976 |
| chr11 | 106313634 | 106313854 |
| chr11 | 106325897 | 106326259 |
| chr11 | 106329782 | 106330077 |
| chr11 | 106339039 | 106339209 |
| chr11 | 106348406 | 106348614 |
| chr11 | 106350887 | 106351210 |
| chr11 | 106351210 | 106351448 |
| chr11 | 106363998 | 106364175 |

|       |           |           |
|-------|-----------|-----------|
| chr11 | 106364839 | 106365195 |
| chr11 | 106366397 | 106366689 |
| chr11 | 106366712 | 106366862 |
| chr11 | 106371385 | 106371596 |
| chr11 | 106374486 | 106374716 |
| chr11 | 106374716 | 106374940 |
| chr11 | 106380224 | 106380374 |
| chr11 | 106391884 | 106392152 |
| chr11 | 106392152 | 106392435 |
| chr11 | 106393067 | 106393500 |
| chr11 | 106397700 | 106397945 |
| chr11 | 106410115 | 106410374 |
| chr11 | 106418639 | 106419084 |
| chr11 | 106419436 | 106419586 |
| chr11 | 106420247 | 106420569 |
| chr11 | 106426514 | 106426726 |
| chr11 | 106437647 | 106437912 |
| chr11 | 106438576 | 106438878 |
| chr11 | 106438878 | 106439249 |
| chr11 | 106470267 | 106470556 |
| chr11 | 106475256 | 106475630 |
| chr11 | 106480370 | 106480636 |
| chr11 | 106480636 | 106480897 |
| chr11 | 106483956 | 106484232 |
| chr11 | 106487239 | 106487485 |
| chr11 | 106487485 | 106487737 |
| chr11 | 106487737 | 106488097 |
| chr11 | 106488112 | 106488323 |
| chr11 | 106488323 | 106488577 |
| chr11 | 106491493 | 106491643 |
| chr11 | 106500435 | 106500674 |
| chr11 | 106500674 | 106501183 |
| chr11 | 106501183 | 106501683 |
| chr11 | 106507496 | 106508034 |
| chr11 | 106513245 | 106513462 |
| chr11 | 106540093 | 106540251 |
| chr11 | 106542420 | 106542761 |
| chr11 | 106555823 | 106556273 |
| chr11 | 106564292 | 106564662 |
| chr11 | 106572830 | 106573274 |
| chr11 | 106573274 | 106573551 |
| chr11 | 106573551 | 106573868 |

|       |           |           |
|-------|-----------|-----------|
| chr11 | 106579946 | 106580234 |
| chr11 | 106580234 | 106580493 |
| chr11 | 106580493 | 106580797 |
| chr11 | 106583361 | 106583587 |
| chr11 | 106588133 | 106588499 |
| chr11 | 106588577 | 106589121 |
| chr11 | 106589121 | 106589495 |
| chr11 | 106598044 | 106598274 |
| chr11 | 106601869 | 106602081 |
| chr11 | 106612153 | 106612472 |
| chr11 | 106612472 | 106612836 |
| chr11 | 106612836 | 106613218 |
| chr11 | 106613218 | 106613578 |
| chr11 | 106614479 | 106614640 |
| chr11 | 106625637 | 106625860 |
| chr11 | 106627629 | 106627812 |
| chr11 | 106627812 | 106628101 |
| chr11 | 106637794 | 106638109 |
| chr11 | 106642016 | 106642166 |
| chr11 | 106648363 | 106648796 |
| chr11 | 106658028 | 106658311 |
| chr11 | 106658311 | 106658559 |
| chr11 | 106658559 | 106658853 |
| chr11 | 106659435 | 106659633 |
| chr11 | 106659633 | 106659923 |
| chr11 | 106665444 | 106665598 |
| chr11 | 106666277 | 106667001 |
| chr11 | 106674400 | 106674608 |
| chr11 | 106674608 | 106674806 |
| chr11 | 106679917 | 106680117 |
| chr11 | 106713630 | 106713963 |
| chr11 | 106716624 | 106716779 |
| chr11 | 106722771 | 106723281 |
| chr11 | 106741301 | 106741563 |
| chr11 | 106742627 | 106742787 |
| chr11 | 106751063 | 106751374 |
| chr11 | 106779005 | 106779427 |
| chr11 | 106779427 | 106780287 |
| chr11 | 106787573 | 106787813 |
| chr11 | 106788183 | 106788549 |
| chr11 | 106788549 | 106788766 |
| chr11 | 106788766 | 106789052 |

|       |           |           |
|-------|-----------|-----------|
| chr11 | 106789052 | 106789518 |
| chr11 | 106789842 | 106790000 |
| chr11 | 106806523 | 106806894 |
| chr11 | 106808406 | 106808606 |
| chr11 | 106808606 | 106808834 |
| chr11 | 106812447 | 106812734 |
| chr11 | 106812859 | 106813064 |
| chr11 | 106821041 | 106821250 |
| chr11 | 106855514 | 106855669 |
| chr11 | 106855672 | 106855832 |
| chr11 | 106890526 | 106890859 |
| chr11 | 106891501 | 106891827 |
| chr11 | 106896617 | 106896850 |
| chr11 | 106896989 | 106897176 |
| chr11 | 106911420 | 106911570 |
| chr11 | 106919576 | 106920107 |
| chr11 | 106920107 | 106920585 |
| chr11 | 106920585 | 106920789 |
| chr11 | 106920789 | 106921020 |
| chr11 | 106921020 | 106921289 |
| chr11 | 106927977 | 106928357 |
| chr11 | 106930568 | 106930790 |
| chr11 | 106945562 | 106945785 |
| chr11 | 106947147 | 106947325 |
| chr11 | 106947887 | 106948127 |
| chr11 | 106948275 | 106948618 |
| chr11 | 106954245 | 106954468 |
| chr11 | 106954691 | 106954859 |
| chr11 | 106957344 | 106958095 |
| chr11 | 106967650 | 106968002 |
| chr11 | 106971107 | 106971393 |
| chr11 | 106976317 | 106976796 |
| chr11 | 106980498 | 106980772 |
| chr11 | 106982226 | 106982732 |
| chr11 | 106984249 | 106984627 |
| chr11 | 106985583 | 106985823 |
| chr11 | 106985951 | 106986274 |
| chr11 | 106987061 | 106987215 |
| chr11 | 106987386 | 106987545 |
| chr11 | 106987688 | 106987990 |
| chr11 | 106998762 | 106999080 |
| chr11 | 106999080 | 106999394 |

|       |           |           |
|-------|-----------|-----------|
| chr11 | 106999394 | 106999604 |
| chr11 | 106999604 | 106999873 |
| chr11 | 107005398 | 107005917 |
| chr11 | 107011830 | 107012066 |
| chr11 | 107012215 | 107012596 |
| chr11 | 107012596 | 107012802 |
| chr11 | 107012802 | 107013043 |
| chr11 | 107018688 | 107018941 |
| chr11 | 107022402 | 107022579 |
| chr11 | 107027377 | 107027574 |
| chr11 | 107027619 | 107028065 |
| chr11 | 107028065 | 107028289 |
| chr11 | 107028289 | 107028577 |
| chr11 | 107037371 | 107037526 |
| chr11 | 107044170 | 107044703 |
| chr11 | 107044712 | 107044886 |
| chr11 | 107045247 | 107045481 |
| chr11 | 107050486 | 107050646 |
| chr11 | 107069934 | 107070185 |
| chr11 | 107070218 | 107070386 |
| chr11 | 107102596 | 107102819 |
| chr11 | 107102898 | 107103263 |
| chr11 | 107103263 | 107103627 |
| chr11 | 107103766 | 107103981 |
| chr11 | 107105375 | 107105540 |
| chr11 | 107107767 | 107107984 |
| chr11 | 107108564 | 107108734 |
| chr11 | 107113102 | 107113640 |
| chr11 | 107117932 | 107118096 |
| chr11 | 107124255 | 107124968 |
| chr11 | 107131119 | 107131368 |
| chr11 | 107131377 | 107131606 |
| chr11 | 107131606 | 107131790 |
| chr11 | 107131790 | 107132054 |
| chr11 | 107132054 | 107132422 |
| chr11 | 107132507 | 107132800 |
| chr11 | 107138794 | 107138947 |
| chr11 | 107148559 | 107148856 |
| chr11 | 107149348 | 107149690 |
| chr11 | 107149690 | 107150056 |
| chr11 | 107150056 | 107150493 |
| chr11 | 107156772 | 107157210 |



|       |           |           |
|-------|-----------|-----------|
| chr11 | 107157210 | 107157722 |
| chr11 | 107157736 | 107157969 |
| chr11 | 107157969 | 107158202 |
| chr11 | 107183959 | 107184199 |
| chr11 | 107188600 | 107188972 |
| chr11 | 107188972 | 107189198 |
| chr11 | 107189198 | 107189562 |
| chr11 | 107195386 | 107195605 |
| chr11 | 107215262 | 107215424 |
| chr11 | 107252635 | 107252849 |
| chr11 | 107255438 | 107255673 |
| chr11 | 107275951 | 107276280 |
| chr11 | 107276386 | 107276658 |
| chr11 | 107287091 | 107287790 |
| chr11 | 107287790 | 107288074 |
| chr11 | 107295412 | 107295699 |
| chr11 | 107295744 | 107296042 |
| chr11 | 107296256 | 107296800 |
| chr11 | 107296800 | 107297276 |
| chr11 | 107298974 | 107299240 |
| chr11 | 107321866 | 107322016 |
| chr11 | 107333042 | 107333208 |
| chr11 | 107341250 | 107341776 |
| chr11 | 107347628 | 107347873 |
| chr11 | 107347975 | 107348574 |
| chr11 | 107351311 | 107351601 |
| chr11 | 107358725 | 107359062 |
| chr11 | 107370561 | 107370863 |
| chr11 | 107370863 | 107371134 |
| chr11 | 107376272 | 107376600 |
| chr11 | 107379560 | 107379721 |
| chr11 | 107385361 | 107385627 |
| chr11 | 107410380 | 107410720 |
| chr11 | 107416996 | 107417702 |
| chr11 | 107424763 | 107424989 |
| chr11 | 107427942 | 107428462 |
| chr11 | 107428477 | 107428633 |
| chr11 | 107431281 | 107431534 |
| chr11 | 107436016 | 107436285 |
| chr11 | 107448053 | 107448318 |
| chr11 | 107448592 | 107448852 |
| chr11 | 107449214 | 107449432 |

|       |           |           |
|-------|-----------|-----------|
| chr11 | 107451148 | 107451698 |
| chr11 | 107457329 | 107457571 |
| chr11 | 107457717 | 107457894 |
| chr11 | 107458002 | 107458656 |
| chr11 | 107458656 | 107459017 |
| chr11 | 107468926 | 107469406 |
| chr11 | 107469517 | 107470010 |
| chr11 | 107470010 | 107470308 |
| chr11 | 107470509 | 107470985 |
| chr11 | 107473121 | 107473466 |
| chr11 | 107479234 | 107479624 |
| chr11 | 107479624 | 107479850 |
| chr11 | 107479850 | 107480045 |
| chr11 | 107491381 | 107491580 |
| chr11 | 107502464 | 107502646 |
| chr11 | 107503256 | 107503413 |
| chr11 | 107505983 | 107506137 |
| chr11 | 107506387 | 107506643 |
| chr11 | 107509685 | 107509931 |
| chr11 | 107510922 | 107511199 |
| chr11 | 107512028 | 107512254 |
| chr11 | 107527386 | 107527577 |
| chr11 | 107539080 | 107539314 |
| chr11 | 107546048 | 107546420 |
| chr11 | 107546577 | 107547194 |
| chr11 | 107547319 | 107547664 |
| chr11 | 107547664 | 107547970 |
| chr11 | 107547970 | 107548242 |
| chr11 | 107552418 | 107552614 |
| chr11 | 107567923 | 107568170 |
| chr11 | 107570698 | 107570914 |
| chr11 | 107573895 | 107574215 |
| chr11 | 107574776 | 107575172 |
| chr11 | 107616042 | 107616192 |
| chr11 | 107629546 | 107629831 |
| chr11 | 107636197 | 107636448 |
| chr11 | 107647204 | 107647442 |
| chr11 | 107688470 | 107688620 |
| chr11 | 107705143 | 107705391 |
| chr11 | 107705526 | 107705714 |
| chr11 | 107711453 | 107711640 |
| chr11 | 107714322 | 107714486 |

|       |           |           |
|-------|-----------|-----------|
| chr11 | 107714520 | 107714723 |
| chr11 | 107728608 | 107728920 |
| chr11 | 107731584 | 107731829 |
| chr11 | 107737917 | 107738149 |
| chr11 | 107741142 | 107741326 |
| chr11 | 107748278 | 107748625 |
| chr11 | 107748868 | 107749112 |
| chr11 | 107749114 | 107749406 |
| chr11 | 107752562 | 107752807 |
| chr11 | 107760776 | 107760938 |
| chr11 | 107784514 | 107784748 |
| chr11 | 107784748 | 107784967 |
| chr11 | 107785025 | 107785215 |
| chr11 | 107786003 | 107786186 |
| chr11 | 107793186 | 107793435 |
| chr11 | 107793435 | 107793712 |
| chr11 | 107794605 | 107794876 |
| chr11 | 107852403 | 107852589 |
| chr11 | 107859353 | 107859586 |
| chr11 | 107860081 | 107860253 |
| chr11 | 107864116 | 107864282 |
| chr11 | 107865211 | 107865460 |
| chr11 | 107900558 | 107900780 |
| chr11 | 107914909 | 107915133 |
| chr11 | 107920211 | 107920410 |
| chr11 | 107982625 | 107982782 |
| chr11 | 107985949 | 107986281 |
| chr11 | 107991868 | 107992362 |
| chr11 | 107994597 | 107994810 |
| chr11 | 107997460 | 107997610 |
| chr11 | 108009853 | 108010109 |
| chr11 | 108010109 | 108010481 |
| chr11 | 108010615 | 108010766 |
| chr11 | 108011167 | 108011646 |
| chr11 | 108019246 | 108019573 |
| chr11 | 108020053 | 108020578 |
| chr11 | 108025677 | 108026122 |
| chr11 | 108026122 | 108026465 |
| chr11 | 108026465 | 108026772 |
| chr11 | 108031028 | 108031264 |
| chr11 | 108031264 | 108031637 |
| chr11 | 108064515 | 108064773 |

|       |           |           |
|-------|-----------|-----------|
| chr11 | 108072474 | 108073176 |
| chr11 | 108098380 | 108098620 |
| chr11 | 108101408 | 108102064 |
| chr11 | 108103258 | 108103408 |
| chr11 | 108114764 | 108115031 |
| chr11 | 108119007 | 108119193 |
| chr11 | 108120331 | 108120769 |
| chr11 | 108120769 | 108121190 |
| chr11 | 108128625 | 108129054 |
| chr11 | 108135487 | 108135701 |
| chr11 | 108135771 | 108136072 |
| chr11 | 108136947 | 108137223 |
| chr11 | 108137274 | 108137594 |
| chr11 | 108140124 | 108140388 |
| chr11 | 108160192 | 108160418 |
| chr11 | 108178314 | 108178582 |
| chr11 | 108197859 | 108198102 |
| chr11 | 108214914 | 108215256 |
| chr11 | 108215423 | 108215890 |
| chr11 | 108216911 | 108217131 |
| chr11 | 108217131 | 108217465 |
| chr11 | 108225283 | 108225640 |
| chr11 | 108247270 | 108247506 |
| chr11 | 108248115 | 108248368 |
| chr11 | 108258775 | 108258990 |
| chr11 | 108259401 | 108259667 |
| chr11 | 108259667 | 108259980 |
| chr11 | 108259980 | 108260344 |
| chr11 | 108267741 | 108268196 |
| chr11 | 108268196 | 108268651 |
| chr11 | 108268735 | 108268960 |
| chr11 | 108268960 | 108269219 |
| chr11 | 108273965 | 108274142 |
| chr11 | 108279936 | 108280305 |
| chr11 | 108282787 | 108283124 |
| chr11 | 108283124 | 108283396 |
| chr11 | 108283396 | 108283719 |
| chr11 | 108306768 | 108307190 |
| chr11 | 108307190 | 108307785 |
| chr11 | 108318069 | 108318303 |
| chr11 | 108342891 | 108343295 |
| chr11 | 108343295 | 108343654 |

|       |           |           |
|-------|-----------|-----------|
| chr11 | 108343654 | 108343998 |
| chr11 | 108343998 | 108344495 |
| chr11 | 108345425 | 108345625 |
| chr11 | 108357398 | 108357579 |
| chr11 | 108364871 | 108365271 |
| chr11 | 108365271 | 108365638 |
| chr11 | 108365673 | 108365950 |
| chr11 | 108374997 | 108375346 |
| chr11 | 108378051 | 108378438 |
| chr11 | 108378454 | 108378637 |
| chr11 | 108403102 | 108403280 |
| chr11 | 108418631 | 108418865 |
| chr11 | 108424711 | 108424979 |
| chr11 | 108424979 | 108425318 |
| chr11 | 108425318 | 108425586 |
| chr11 | 108425586 | 108425793 |
| chr11 | 108445215 | 108445682 |
| chr11 | 108449856 | 108450013 |
| chr11 | 108459497 | 108460183 |
| chr11 | 108484779 | 108485061 |
| chr11 | 108491633 | 108491832 |
| chr11 | 108525672 | 108525862 |
| chr11 | 108525867 | 108526018 |
| chr11 | 108526574 | 108526739 |
| chr11 | 108526739 | 108526900 |
| chr11 | 108752153 | 108752686 |
| chr11 | 108753575 | 108753866 |
| chr11 | 108757814 | 108758092 |
| chr11 | 108758092 | 108758384 |
| chr11 | 108920053 | 108920559 |
| chr11 | 108920559 | 108920923 |
| chr11 | 108921102 | 108921310 |
| chr11 | 108925259 | 108925546 |
| chr11 | 108980478 | 108980693 |
| chr11 | 108980693 | 108980973 |
| chr11 | 108981131 | 108981290 |
| chr11 | 109011572 | 109011818 |
| chr11 | 109011818 | 109012185 |
| chr11 | 109030536 | 109030761 |
| chr11 | 109114017 | 109114167 |
| chr11 | 109149627 | 109149784 |
| chr11 | 109177604 | 109178156 |

|       |           |           |
|-------|-----------|-----------|
| chr11 | 109193275 | 109193513 |
| chr11 | 109220941 | 109221215 |
| chr11 | 109241010 | 109241193 |
| chr11 | 109244611 | 109245004 |
| chr11 | 109245332 | 109245517 |
| chr11 | 109297808 | 109298048 |
| chr11 | 109298048 | 109298408 |
| chr11 | 109312199 | 109312459 |
| chr11 | 109316208 | 109316540 |
| chr11 | 109321841 | 109322059 |
| chr11 | 109331128 | 109331363 |
| chr11 | 109331363 | 109331626 |
| chr11 | 109331626 | 109331879 |
| chr11 | 109332706 | 109333078 |
| chr11 | 109341421 | 109341602 |
| chr11 | 109343933 | 109344323 |
| chr11 | 109344323 | 109344653 |
| chr11 | 109347734 | 109347932 |
| chr11 | 109349693 | 109349860 |
| chr11 | 109350017 | 109350260 |
| chr11 | 109350346 | 109350646 |
| chr11 | 109361650 | 109362143 |
| chr11 | 109362297 | 109362756 |
| chr11 | 109362756 | 109363074 |
| chr11 | 109363074 | 109363374 |
| chr11 | 109363374 | 109363615 |
| chr11 | 109368946 | 109369395 |
| chr11 | 109382469 | 109383073 |
| chr11 | 109417020 | 109417236 |
| chr11 | 109417417 | 109417922 |
| chr11 | 109425365 | 109425901 |
| chr11 | 109425901 | 109426503 |
| chr11 | 109431566 | 109431716 |
| chr11 | 109434289 | 109434639 |
| chr11 | 109439252 | 109439577 |
| chr11 | 109439784 | 109440404 |
| chr11 | 109441245 | 109441471 |
| chr11 | 109444713 | 109444907 |
| chr11 | 109445670 | 109446132 |
| chr11 | 109472220 | 109472449 |
| chr11 | 109472937 | 109473488 |
| chr11 | 109473488 | 109473836 |

|       |           |           |
|-------|-----------|-----------|
| chr11 | 109473836 | 109474119 |
| chr11 | 109474119 | 109474372 |
| chr11 | 109487771 | 109487942 |
| chr11 | 109487990 | 109488367 |
| chr11 | 109488367 | 109488627 |
| chr11 | 109494780 | 109495290 |
| chr11 | 109496280 | 109496495 |
| chr11 | 109502574 | 109502828 |
| chr11 | 109507637 | 109507848 |
| chr11 | 109514152 | 109514526 |
| chr11 | 109554479 | 109554829 |
| chr11 | 109560734 | 109561022 |
| chr11 | 109561954 | 109562104 |
| chr11 | 109584983 | 109585417 |
| chr11 | 109585453 | 109585604 |
| chr11 | 109598873 | 109599023 |
| chr11 | 109610257 | 109610474 |
| chr11 | 109610788 | 109611059 |
| chr11 | 109611059 | 109611277 |
| chr11 | 109611277 | 109611517 |
| chr11 | 109611517 | 109611754 |
| chr11 | 109611754 | 109612157 |
| chr11 | 109619103 | 109619401 |
| chr11 | 109621113 | 109621544 |
| chr11 | 109622622 | 109622772 |
| chr11 | 109635868 | 109636213 |
| chr11 | 109637178 | 109637477 |
| chr11 | 109642122 | 109642314 |
| chr11 | 109650262 | 109650637 |
| chr11 | 109650748 | 109651050 |
| chr11 | 109651050 | 109651496 |
| chr11 | 109651679 | 109651845 |
| chr11 | 109656829 | 109657151 |
| chr11 | 109670431 | 109670715 |
| chr11 | 109670715 | 109670997 |
| chr11 | 109671755 | 109672017 |
| chr11 | 109672017 | 109672317 |
| chr11 | 109681608 | 109681905 |
| chr11 | 109697202 | 109697360 |
| chr11 | 109698824 | 109699042 |
| chr11 | 109721118 | 109721435 |
| chr11 | 109721435 | 109721861 |

|       |           |           |
|-------|-----------|-----------|
| chr11 | 109721861 | 109722207 |
| chr11 | 109722207 | 109722468 |
| chr11 | 109816959 | 109817218 |
| chr11 | 109852641 | 109852872 |
| chr11 | 109860193 | 109860564 |
| chr11 | 109860564 | 109860940 |
| chr11 | 109863409 | 109863633 |
| chr11 | 109991090 | 109991292 |
| chr11 | 109991379 | 109991585 |
| chr11 | 109995068 | 109995400 |
| chr11 | 109995684 | 109995992 |
| chr11 | 110029014 | 110029265 |
| chr11 | 110029265 | 110029648 |
| chr11 | 110053740 | 110053980 |
| chr11 | 110061197 | 110061382 |
| chr11 | 110062012 | 110062391 |
| chr11 | 110171313 | 110171513 |
| chr11 | 110268372 | 110268568 |
| chr11 | 110268568 | 110268830 |
| chr11 | 110271819 | 110272056 |
| chr11 | 110288501 | 110288723 |
| chr11 | 110290751 | 110290906 |
| chr11 | 110306423 | 110306825 |
| chr11 | 110306825 | 110307227 |
| chr11 | 110307707 | 110308088 |
| chr11 | 110336973 | 110337346 |
| chr11 | 110337346 | 110337533 |
| chr11 | 110337533 | 110337723 |
| chr11 | 110337723 | 110338168 |
| chr11 | 110357824 | 110358198 |
| chr11 | 110358198 | 110358654 |
| chr11 | 110365127 | 110365315 |
| chr11 | 110379059 | 110379363 |
| chr11 | 110379591 | 110379929 |
| chr11 | 110379929 | 110380328 |
| chr11 | 110394890 | 110395045 |
| chr11 | 110395149 | 110395323 |
| chr11 | 110398787 | 110399237 |
| chr11 | 110402764 | 110402972 |
| chr11 | 110405399 | 110405688 |
| chr11 | 110405688 | 110406048 |
| chr11 | 110413780 | 110414243 |



|       |           |           |
|-------|-----------|-----------|
| chr11 | 110414243 | 110414676 |
| chr11 | 110414821 | 110415021 |
| chr11 | 110422204 | 110422389 |
| chr11 | 110438906 | 110439231 |
| chr11 | 110439317 | 110439725 |
| chr11 | 110448803 | 110449020 |
| chr11 | 110450109 | 110450815 |
| chr11 | 110451572 | 110451853 |
| chr11 | 110466820 | 110467135 |
| chr11 | 110469097 | 110469356 |
| chr11 | 110471833 | 110472046 |
| chr11 | 110472064 | 110472475 |
| chr11 | 110478985 | 110479413 |
| chr11 | 110479621 | 110479771 |
| chr11 | 110483260 | 110483520 |
| chr11 | 110485084 | 110485481 |
| chr11 | 110485930 | 110486122 |
| chr11 | 110496084 | 110496458 |
| chr11 | 110498676 | 110498945 |
| chr11 | 110498982 | 110499132 |
| chr11 | 110511324 | 110511980 |
| chr11 | 110537587 | 110537864 |
| chr11 | 110537867 | 110538027 |
| chr11 | 110541531 | 110541681 |
| chr11 | 110544516 | 110544883 |
| chr11 | 110633431 | 110633591 |
| chr11 | 110698021 | 110698409 |
| chr11 | 110698409 | 110698636 |
| chr11 | 110698636 | 110698852 |
| chr11 | 110698918 | 110699161 |
| chr11 | 110781935 | 110782236 |
| chr11 | 111065620 | 111066261 |
| chr11 | 111515542 | 111515861 |
| chr11 | 111536190 | 111536341 |
| chr11 | 111688422 | 111688842 |
| chr11 | 111702477 | 111702825 |
| chr11 | 111763676 | 111763835 |
| chr11 | 111764081 | 111764232 |
| chr11 | 111832323 | 111832617 |
| chr11 | 111856672 | 111856943 |
| chr11 | 111858139 | 111858425 |
| chr11 | 111880108 | 111880455 |

|       |           |           |
|-------|-----------|-----------|
| chr11 | 111919565 | 111919715 |
| chr11 | 111919717 | 111920112 |
| chr11 | 111971212 | 111971410 |
| chr11 | 112003141 | 112003331 |
| chr11 | 112003331 | 112003539 |
| chr11 | 112005280 | 112005490 |
| chr11 | 112029047 | 112029254 |
| chr11 | 112140833 | 112141010 |
| chr11 | 112142830 | 112143039 |
| chr11 | 112153267 | 112153563 |
| chr11 | 112154848 | 112155474 |
| chr11 | 112155561 | 112155854 |
| chr11 | 112156611 | 112156969 |
| chr11 | 112163861 | 112164048 |
| chr11 | 112173293 | 112173595 |
| chr11 | 112173595 | 112174087 |
| chr11 | 112232405 | 112232688 |
| chr11 | 112253005 | 112253418 |
| chr11 | 112303088 | 112303430 |
| chr11 | 112339533 | 112339700 |
| chr11 | 112406279 | 112406808 |
| chr11 | 112406808 | 112407245 |
| chr11 | 112442716 | 112442918 |
| chr11 | 112460198 | 112460391 |
| chr11 | 112470464 | 112470739 |
| chr11 | 112548737 | 112548887 |
| chr11 | 112588150 | 112588343 |
| chr11 | 112605081 | 112605258 |
| chr11 | 112615509 | 112616099 |
| chr11 | 112621181 | 112621350 |
| chr11 | 112621487 | 112621759 |
| chr11 | 112622003 | 112622198 |
| chr11 | 112623607 | 112623829 |
| chr11 | 112640424 | 112640596 |
| chr11 | 112660024 | 112660238 |
| chr11 | 112661499 | 112661671 |
| chr11 | 112661671 | 112661859 |
| chr11 | 112686129 | 112686298 |
| chr11 | 112730467 | 112731207 |
| chr11 | 112737187 | 112737416 |
| chr11 | 112755261 | 112755518 |
| chr11 | 112757995 | 112758462 |

|       |           |           |
|-------|-----------|-----------|
| chr11 | 112758566 | 112758768 |
| chr11 | 112767163 | 112767317 |
| chr11 | 112781404 | 112781611 |
| chr11 | 112781611 | 112781928 |
| chr11 | 112781928 | 112782300 |
| chr11 | 112782300 | 112782689 |
| chr11 | 112782689 | 112783142 |
| chr11 | 112787979 | 112788277 |
| chr11 | 112788352 | 112788687 |
| chr11 | 112794803 | 112795034 |
| chr11 | 112800768 | 112801042 |
| chr11 | 112806483 | 112806706 |
| chr11 | 112811563 | 112811903 |
| chr11 | 112824175 | 112824503 |
| chr11 | 112847230 | 112847447 |
| chr11 | 112850562 | 112850881 |
| chr11 | 112856477 | 112856868 |
| chr11 | 112856868 | 112857167 |
| chr11 | 112891656 | 112891920 |
| chr11 | 112897612 | 112897983 |
| chr11 | 112921669 | 112922029 |
| chr11 | 112947153 | 112947433 |
| chr11 | 112974933 | 112975157 |
| chr11 | 112988372 | 112988641 |
| chr11 | 112996887 | 112997217 |
| chr11 | 113000468 | 113000620 |
| chr11 | 113000853 | 113001613 |
| chr11 | 113008511 | 113009047 |
| chr11 | 113009232 | 113009637 |
| chr11 | 113010848 | 113011318 |
| chr11 | 113015876 | 113016241 |
| chr11 | 113016273 | 113016423 |
| chr11 | 113019161 | 113019459 |
| chr11 | 113026819 | 113027310 |
| chr11 | 113027310 | 113027554 |
| chr11 | 113032177 | 113033012 |
| chr11 | 113039027 | 113039213 |
| chr11 | 113042792 | 113042956 |
| chr11 | 113045590 | 113045857 |
| chr11 | 113050765 | 113051070 |
| chr11 | 113059976 | 113060172 |
| chr11 | 113060797 | 113061017 |

|       |           |           |
|-------|-----------|-----------|
| chr11 | 113061017 | 113061532 |
| chr11 | 113062858 | 113063439 |
| chr11 | 113063439 | 113063768 |
| chr11 | 113074175 | 113074970 |
| chr11 | 113080256 | 113080464 |
| chr11 | 113080972 | 113081174 |
| chr11 | 113087155 | 113087351 |
| chr11 | 113087351 | 113087524 |
| chr11 | 113093918 | 113094181 |
| chr11 | 113094181 | 113094382 |
| chr11 | 113100916 | 113101080 |
| chr11 | 113101080 | 113101259 |
| chr11 | 113101533 | 113101982 |
| chr11 | 113102590 | 113103073 |
| chr11 | 113103073 | 113103512 |
| chr11 | 113103512 | 113103902 |
| chr11 | 113109223 | 113109451 |
| chr11 | 113113022 | 113113287 |
| chr11 | 113113287 | 113113707 |
| chr11 | 113114545 | 113114744 |
| chr11 | 113121483 | 113121641 |
| chr11 | 113131191 | 113131400 |
| chr11 | 113132146 | 113132328 |
| chr11 | 113132475 | 113132697 |
| chr11 | 113135297 | 113135609 |
| chr11 | 113143176 | 113143355 |
| chr11 | 113143848 | 113144124 |
| chr11 | 113146586 | 113146846 |
| chr11 | 113146846 | 113147332 |
| chr11 | 113153416 | 113153756 |
| chr11 | 113155440 | 113155969 |
| chr11 | 113157383 | 113157552 |
| chr11 | 113162468 | 113162642 |
| chr11 | 113164988 | 113165420 |
| chr11 | 113165420 | 113165798 |
| chr11 | 113172491 | 113172719 |
| chr11 | 113172880 | 113173095 |
| chr11 | 113173976 | 113174172 |
| chr11 | 113174172 | 113174280 |
| chr11 | 113175439 | 113175773 |
| chr11 | 113176233 | 113176465 |
| chr11 | 113179898 | 113180569 |

|       |           |           |
|-------|-----------|-----------|
| chr11 | 113182550 | 113182742 |
| chr11 | 113184284 | 113184434 |
| chr11 | 113191776 | 113191933 |
| chr11 | 113192014 | 113192427 |
| chr11 | 113192564 | 113192848 |
| chr11 | 113198254 | 113198553 |
| chr11 | 113198559 | 113198904 |
| chr11 | 113198904 | 113199128 |
| chr11 | 113200879 | 113201036 |
| chr11 | 113201449 | 113201703 |
| chr11 | 113201703 | 113202037 |
| chr11 | 113208351 | 113208801 |
| chr11 | 113208801 | 113209186 |
| chr11 | 113209186 | 113209525 |
| chr11 | 113209525 | 113209750 |
| chr11 | 113214791 | 113215365 |
| chr11 | 113220665 | 113221000 |
| chr11 | 113232523 | 113232673 |
| chr11 | 113246459 | 113246903 |
| chr11 | 113246903 | 113247144 |
| chr11 | 113247630 | 113247835 |
| chr11 | 113254959 | 113255199 |
| chr11 | 113258165 | 113258329 |
| chr11 | 113265326 | 113265559 |
| chr11 | 113265605 | 113265826 |
| chr11 | 113265826 | 113266060 |
| chr11 | 113268848 | 113269322 |
| chr11 | 113283212 | 113283606 |
| chr11 | 113292017 | 113292408 |
| chr11 | 113292408 | 113292717 |
| chr11 | 113296241 | 113296465 |
| chr11 | 113297369 | 113297562 |
| chr11 | 113297656 | 113297806 |
| chr11 | 113297834 | 113298115 |
| chr11 | 113303328 | 113303551 |
| chr11 | 113305760 | 113305915 |
| chr11 | 113319669 | 113319821 |
| chr11 | 113319860 | 113320151 |
| chr11 | 113321726 | 113321939 |
| chr11 | 113321939 | 113322118 |
| chr11 | 113322177 | 113322465 |
| chr11 | 113326016 | 113326167 |

|       |           |           |
|-------|-----------|-----------|
| chr11 | 113326406 | 113326684 |
| chr11 | 113329830 | 113330024 |
| chr11 | 113334461 | 113334635 |
| chr11 | 113352122 | 113352821 |
| chr11 | 113353968 | 113354451 |
| chr11 | 113383898 | 113384190 |
| chr11 | 113458695 | 113458876 |
| chr11 | 113469558 | 113470000 |
| chr11 | 113470000 | 113470461 |
| chr11 | 113478262 | 113478478 |
| chr11 | 113487333 | 113487956 |
| chr11 | 113487956 | 113488262 |
| chr11 | 113498965 | 113499203 |
| chr11 | 113507385 | 113507565 |
| chr11 | 113508129 | 113508552 |
| chr11 | 113508795 | 113509045 |
| chr11 | 113510420 | 113510572 |
| chr11 | 113516283 | 113516489 |
| chr11 | 113527500 | 113527756 |
| chr11 | 113534383 | 113534780 |
| chr11 | 113536378 | 113536825 |
| chr11 | 113536825 | 113537208 |
| chr11 | 113537208 | 113537418 |
| chr11 | 113537730 | 113538146 |
| chr11 | 113543779 | 113544076 |
| chr11 | 113554774 | 113554992 |
| chr11 | 113565241 | 113565571 |
| chr11 | 113565571 | 113566017 |
| chr11 | 113602774 | 113602972 |
| chr11 | 113609705 | 113609968 |
| chr11 | 113612056 | 113612575 |
| chr11 | 113617700 | 113617855 |
| chr11 | 113618648 | 113618829 |
| chr11 | 113618829 | 113619102 |
| chr11 | 113619102 | 113619780 |
| chr11 | 113630754 | 113630918 |
| chr11 | 113646727 | 113646877 |
| chr11 | 113648025 | 113648183 |
| chr11 | 113648244 | 113648505 |
| chr11 | 113649218 | 113649663 |
| chr11 | 113649663 | 113649879 |
| chr11 | 113649879 | 113650188 |

|       |           |           |
|-------|-----------|-----------|
| chr11 | 113651371 | 113651525 |
| chr11 | 113651927 | 113652104 |
| chr11 | 113658835 | 113659193 |
| chr11 | 113660287 | 113660489 |
| chr11 | 113666757 | 113667075 |
| chr11 | 113667142 | 113667671 |
| chr11 | 113667788 | 113667939 |
| chr11 | 113674033 | 113674268 |
| chr11 | 113683162 | 113683576 |
| chr11 | 113683576 | 113683926 |
| chr11 | 113683926 | 113684264 |
| chr11 | 113684351 | 113684552 |
| chr11 | 113684552 | 113684882 |
| chr11 | 113691393 | 113691543 |
| chr11 | 113703587 | 113703793 |
| chr11 | 113703793 | 113704254 |
| chr11 | 113708655 | 113708862 |
| chr11 | 113713969 | 113714249 |
| chr11 | 113714298 | 113714627 |
| chr11 | 113715156 | 113715348 |
| chr11 | 113715361 | 113715574 |
| chr11 | 113716213 | 113716597 |
| chr11 | 113729913 | 113730375 |
| chr11 | 113732371 | 113732538 |
| chr11 | 113733415 | 113733567 |
| chr11 | 113733578 | 113733997 |
| chr11 | 113733997 | 113734434 |
| chr11 | 113735190 | 113735515 |
| chr11 | 113739222 | 113739521 |
| chr11 | 113749844 | 113749998 |
| chr11 | 113750590 | 113750978 |
| chr11 | 113750978 | 113751220 |
| chr11 | 113751220 | 113751598 |
| chr11 | 113751598 | 113752130 |
| chr11 | 113756784 | 113756969 |
| chr11 | 113758976 | 113759193 |
| chr11 | 113766366 | 113766921 |
| chr11 | 113803570 | 113803862 |
| chr11 | 113809746 | 113809896 |
| chr11 | 113811088 | 113811242 |
| chr11 | 113811267 | 113811536 |
| chr11 | 113815737 | 113816023 |

|       |           |           |
|-------|-----------|-----------|
| chr11 | 113816973 | 113817448 |
| chr11 | 113826190 | 113826352 |
| chr11 | 113828374 | 113828529 |
| chr11 | 113835119 | 113835473 |
| chr11 | 113865645 | 113866060 |
| chr11 | 113927416 | 113927588 |
| chr11 | 113939215 | 113939370 |
| chr11 | 114038108 | 114038367 |
| chr11 | 114198401 | 114198553 |
| chr11 | 114387192 | 114387400 |
| chr11 | 114412118 | 114412383 |
| chr11 | 114412383 | 114412602 |
| chr11 | 114412602 | 114412825 |
| chr11 | 114446801 | 114446958 |
| chr11 | 114478853 | 114479053 |
| chr11 | 114502228 | 114502496 |
| chr11 | 114502839 | 114503007 |
| chr11 | 114523555 | 114523710 |
| chr11 | 114636231 | 114636652 |
| chr11 | 114636915 | 114637169 |
| chr11 | 114649091 | 114649290 |
| chr11 | 114654676 | 114654917 |
| chr11 | 114657814 | 114658253 |
| chr11 | 114663066 | 114663319 |
| chr11 | 114667974 | 114668169 |
| chr11 | 114668331 | 114668704 |
| chr11 | 114668704 | 114668948 |
| chr11 | 114668948 | 114669268 |
| chr11 | 114673283 | 114673567 |
| chr11 | 114675164 | 114675811 |
| chr11 | 114676146 | 114676326 |
| chr11 | 114687307 | 114687578 |
| chr11 | 114687578 | 114687857 |
| chr11 | 114687857 | 114688286 |
| chr11 | 114694425 | 114694818 |
| chr11 | 114722977 | 114723387 |
| chr11 | 114724986 | 114725188 |
| chr11 | 114725188 | 114725571 |
| chr11 | 114727242 | 114727572 |
| chr11 | 114727861 | 114728060 |
| chr11 | 114729941 | 114730181 |
| chr11 | 114736897 | 114737117 |



|       |           |           |
|-------|-----------|-----------|
| chr11 | 114745143 | 114745448 |
| chr11 | 114747825 | 114748008 |
| chr11 | 114758528 | 114759142 |
| chr11 | 114764810 | 114765156 |
| chr11 | 114765156 | 114765612 |
| chr11 | 114773368 | 114773611 |
| chr11 | 114783371 | 114783584 |
| chr11 | 114786263 | 114786473 |
| chr11 | 114786473 | 114786676 |
| chr11 | 114789075 | 114789423 |
| chr11 | 114793863 | 114794231 |
| chr11 | 114795287 | 114795510 |
| chr11 | 114795561 | 114795756 |
| chr11 | 114802965 | 114803188 |
| chr11 | 114807611 | 114808195 |
| chr11 | 114812694 | 114812941 |
| chr11 | 114812958 | 114813126 |
| chr11 | 114829531 | 114829806 |
| chr11 | 114829818 | 114830098 |
| chr11 | 114830098 | 114830454 |
| chr11 | 114850346 | 114850964 |
| chr11 | 114851010 | 114851225 |
| chr11 | 114851479 | 114851801 |
| chr11 | 114851801 | 114852112 |
| chr11 | 114852112 | 114852378 |
| chr11 | 114858720 | 114858943 |
| chr11 | 114875279 | 114875531 |
| chr11 | 114876192 | 114876497 |
| chr11 | 114876787 | 114877245 |
| chr11 | 114877245 | 114877631 |
| chr11 | 114882970 | 114883120 |
| chr11 | 114883455 | 114883605 |
| chr11 | 114884030 | 114884355 |
| chr11 | 114884385 | 114884668 |
| chr11 | 114885163 | 114885341 |
| chr11 | 114903404 | 114903596 |
| chr11 | 114907669 | 114907967 |
| chr11 | 114912589 | 114912872 |
| chr11 | 114912872 | 114913120 |
| chr11 | 114929431 | 114929670 |
| chr11 | 114929670 | 114929998 |
| chr11 | 114933662 | 114933871 |

|       |           |           |
|-------|-----------|-----------|
| chr11 | 114934020 | 114934254 |
| chr11 | 114934254 | 114934620 |
| chr11 | 114956899 | 114957671 |
| chr11 | 114962911 | 114963303 |
| chr11 | 114965228 | 114965809 |
| chr11 | 114969286 | 114969473 |
| chr11 | 114981901 | 114982201 |
| chr11 | 114986000 | 114986215 |
| chr11 | 114996484 | 114996715 |
| chr11 | 114997593 | 114998021 |
| chr11 | 114998128 | 114998341 |
| chr11 | 115023227 | 115023552 |
| chr11 | 115033985 | 115034329 |
| chr11 | 115044635 | 115044955 |
| chr11 | 115052276 | 115052529 |
| chr11 | 115071671 | 115072031 |
| chr11 | 115072031 | 115072457 |
| chr11 | 115078642 | 115078808 |
| chr11 | 115080940 | 115081198 |
| chr11 | 115083369 | 115083621 |
| chr11 | 115083621 | 115083815 |
| chr11 | 115083815 | 115084064 |
| chr11 | 115087163 | 115087330 |
| chr11 | 115091593 | 115091902 |
| chr11 | 115097539 | 115097693 |
| chr11 | 115103629 | 115103779 |
| chr11 | 115107626 | 115107815 |
| chr11 | 115152160 | 115152316 |
| chr11 | 115153632 | 115153962 |
| chr11 | 115153962 | 115154403 |
| chr11 | 115159691 | 115160211 |
| chr11 | 115162988 | 115163523 |
| chr11 | 115163658 | 115163883 |
| chr11 | 115164522 | 115164802 |
| chr11 | 115164948 | 115165337 |
| chr11 | 115172556 | 115172816 |
| chr11 | 115172816 | 115173112 |
| chr11 | 115173116 | 115173383 |
| chr11 | 115173497 | 115173914 |
| chr11 | 115173914 | 115174347 |
| chr11 | 115179669 | 115179969 |
| chr11 | 115182383 | 115182644 |

|       |           |           |
|-------|-----------|-----------|
| chr11 | 115185012 | 115185283 |
| chr11 | 115187050 | 115187699 |
| chr11 | 115187725 | 115187958 |
| chr11 | 115202218 | 115202622 |
| chr11 | 115202622 | 115202831 |
| chr11 | 115218373 | 115218639 |
| chr11 | 115219050 | 115219893 |
| chr11 | 115222649 | 115222805 |
| chr11 | 115224980 | 115225146 |
| chr11 | 115234820 | 115235209 |
| chr11 | 115249736 | 115249934 |
| chr11 | 115249934 | 115250158 |
| chr11 | 115250158 | 115250386 |
| chr11 | 115250452 | 115250713 |
| chr11 | 115255942 | 115256109 |
| chr11 | 115258025 | 115258467 |
| chr11 | 115265339 | 115265590 |
| chr11 | 115266983 | 115267325 |
| chr11 | 115270192 | 115270368 |
| chr11 | 115270368 | 115270574 |
| chr11 | 115270574 | 115270856 |
| chr11 | 115276626 | 115277086 |
| chr11 | 115277086 | 115277456 |
| chr11 | 115277500 | 115277660 |
| chr11 | 115279721 | 115280095 |
| chr11 | 115283554 | 115283804 |
| chr11 | 115287417 | 115287772 |
| chr11 | 115297188 | 115297528 |
| chr11 | 115297528 | 115297844 |
| chr11 | 115303230 | 115303486 |
| chr11 | 115309230 | 115309439 |
| chr11 | 115314308 | 115314564 |
| chr11 | 115319797 | 115319959 |
| chr11 | 115319969 | 115320309 |
| chr11 | 115321964 | 115322175 |
| chr11 | 115322349 | 115322653 |
| chr11 | 115326788 | 115327163 |
| chr11 | 115327163 | 115327479 |
| chr11 | 115334988 | 115335138 |
| chr11 | 115340850 | 115341047 |
| chr11 | 115341875 | 115342232 |
| chr11 | 115345053 | 115345287 |

|       |           |           |
|-------|-----------|-----------|
| chr11 | 115354232 | 115354652 |
| chr11 | 115358533 | 115359050 |
| chr11 | 115366787 | 115367309 |
| chr11 | 115367309 | 115367616 |
| chr11 | 115367616 | 115367906 |
| chr11 | 115373868 | 115374145 |
| chr11 | 115374145 | 115374774 |
| chr11 | 115376741 | 115377038 |
| chr11 | 115381682 | 115382093 |
| chr11 | 115382093 | 115382594 |
| chr11 | 115393791 | 115393982 |
| chr11 | 115403402 | 115403881 |
| chr11 | 115403881 | 115404221 |
| chr11 | 115412336 | 115412487 |
| chr11 | 115412625 | 115413092 |
| chr11 | 115413092 | 115413553 |
| chr11 | 115413553 | 115414042 |
| chr11 | 115419570 | 115419867 |
| chr11 | 115419867 | 115420257 |
| chr11 | 115420257 | 115420660 |
| chr11 | 115427899 | 115428333 |
| chr11 | 115435467 | 115435706 |
| chr11 | 115435723 | 115435909 |
| chr11 | 115437609 | 115437851 |
| chr11 | 115439495 | 115439687 |
| chr11 | 115444837 | 115445129 |
| chr11 | 115445180 | 115445330 |
| chr11 | 115451755 | 115451948 |
| chr11 | 115461776 | 115461936 |
| chr11 | 115461995 | 115462158 |
| chr11 | 115462161 | 115462667 |
| chr11 | 115462856 | 115463011 |
| chr11 | 115463346 | 115463738 |
| chr11 | 115463738 | 115464065 |
| chr11 | 115473996 | 115474265 |
| chr11 | 115475335 | 115475772 |
| chr11 | 115475772 | 115475995 |
| chr11 | 115475995 | 115476177 |
| chr11 | 115483809 | 115484044 |
| chr11 | 115491107 | 115491262 |
| chr11 | 115491275 | 115491530 |
| chr11 | 115491530 | 115491763 |

|       |           |           |
|-------|-----------|-----------|
| chr11 | 115491763 | 115492062 |
| chr11 | 115492068 | 115492234 |
| chr11 | 115496184 | 115496339 |
| chr11 | 115509993 | 115510178 |
| chr11 | 115513288 | 115513541 |
| chr11 | 115513541 | 115513901 |
| chr11 | 115513901 | 115514313 |
| chr11 | 115514313 | 115514701 |
| chr11 | 115535356 | 115535694 |
| chr11 | 115535694 | 115536048 |
| chr11 | 115536048 | 115536637 |
| chr11 | 115552878 | 115553099 |
| chr11 | 115563444 | 115563667 |
| chr11 | 115564005 | 115564320 |
| chr11 | 115564320 | 115564571 |
| chr11 | 115564571 | 115564763 |
| chr11 | 115564763 | 115564966 |
| chr11 | 115564998 | 115565181 |
| chr11 | 115577736 | 115577925 |
| chr11 | 115578035 | 115578197 |
| chr11 | 115581091 | 115581289 |
| chr11 | 115584802 | 115585008 |
| chr11 | 115590669 | 115590861 |
| chr11 | 115590900 | 115591106 |
| chr11 | 115603373 | 115604015 |
| chr11 | 115604015 | 115604285 |
| chr11 | 115604285 | 115604485 |
| chr11 | 115604485 | 115604703 |
| chr11 | 115611975 | 115612408 |
| chr11 | 115612408 | 115612802 |
| chr11 | 115612802 | 115613080 |
| chr11 | 115613080 | 115613296 |
| chr11 | 115613420 | 115613608 |
| chr11 | 115620548 | 115620745 |
| chr11 | 115627627 | 115627994 |
| chr11 | 115627994 | 115628507 |
| chr11 | 115631117 | 115631318 |
| chr11 | 115640658 | 115640819 |
| chr11 | 115640870 | 115641210 |
| chr11 | 115641210 | 115641475 |
| chr11 | 115641475 | 115641780 |
| chr11 | 115641792 | 115642104 |

|       |           |           |
|-------|-----------|-----------|
| chr11 | 115647512 | 115647755 |
| chr11 | 115653395 | 115653590 |
| chr11 | 115660356 | 115660763 |
| chr11 | 115661354 | 115661509 |
| chr11 | 115673759 | 115673956 |
| chr11 | 115673956 | 115674187 |
| chr11 | 115677658 | 115677815 |
| chr11 | 115684975 | 115685166 |
| chr11 | 115696503 | 115696984 |
| chr11 | 115697825 | 115698017 |
| chr11 | 115699266 | 115699706 |
| chr11 | 115707855 | 115708328 |
| chr11 | 115708328 | 115708905 |
| chr11 | 115708952 | 115709114 |
| chr11 | 115709165 | 115709361 |
| chr11 | 115714484 | 115714882 |
| chr11 | 115716890 | 115717041 |
| chr11 | 115718113 | 115718334 |
| chr11 | 115722621 | 115723093 |
| chr11 | 115741003 | 115741452 |
| chr11 | 115746216 | 115746457 |
| chr11 | 115746620 | 115747072 |
| chr11 | 115747484 | 115747860 |
| chr11 | 115753361 | 115753590 |
| chr11 | 115753590 | 115753873 |
| chr11 | 115765154 | 115765548 |
| chr11 | 115765548 | 115765856 |
| chr11 | 115765856 | 115766156 |
| chr11 | 115766256 | 115766451 |
| chr11 | 115775933 | 115776235 |
| chr11 | 115776464 | 115776826 |
| chr11 | 115779164 | 115779614 |
| chr11 | 115780134 | 115780411 |
| chr11 | 115799487 | 115799670 |
| chr11 | 115813511 | 115813921 |
| chr11 | 115813921 | 115814274 |
| chr11 | 115814519 | 115814821 |
| chr11 | 115814821 | 115815171 |
| chr11 | 115823715 | 115824109 |
| chr11 | 115824109 | 115824410 |
| chr11 | 115824410 | 115824640 |
| chr11 | 115824891 | 115825046 |

|       |           |           |
|-------|-----------|-----------|
| chr11 | 115827411 | 115827665 |
| chr11 | 115827665 | 115828020 |
| chr11 | 115828058 | 115828209 |
| chr11 | 115830990 | 115831389 |
| chr11 | 115838637 | 115839275 |
| chr11 | 115859207 | 115859397 |
| chr11 | 115859397 | 115859629 |
| chr11 | 115859629 | 115859964 |
| chr11 | 115869037 | 115869238 |
| chr11 | 115869300 | 115869834 |
| chr11 | 115872405 | 115872831 |
| chr11 | 115873378 | 115873648 |
| chr11 | 115878222 | 115878596 |
| chr11 | 115881038 | 115881357 |
| chr11 | 115886336 | 115886486 |
| chr11 | 115888305 | 115888630 |
| chr11 | 115889374 | 115889524 |
| chr11 | 115894800 | 115895083 |
| chr11 | 115898903 | 115899155 |
| chr11 | 115899915 | 115900227 |
| chr11 | 115904097 | 115904400 |
| chr11 | 115904639 | 115905330 |
| chr11 | 115905353 | 115905667 |
| chr11 | 115911238 | 115911655 |
| chr11 | 115911655 | 115912084 |
| chr11 | 115912084 | 115912410 |
| chr11 | 115912410 | 115912754 |
| chr11 | 115920005 | 115920155 |
| chr11 | 115920190 | 115920430 |
| chr11 | 115920455 | 115920769 |
| chr11 | 115933005 | 115933194 |
| chr11 | 115933202 | 115933703 |
| chr11 | 115933703 | 115933901 |
| chr11 | 115933901 | 115934089 |
| chr11 | 115939742 | 115940061 |
| chr11 | 115940197 | 115940364 |
| chr11 | 115942060 | 115942319 |
| chr11 | 115945206 | 115945366 |
| chr11 | 115945368 | 115945592 |
| chr11 | 115948322 | 115948652 |
| chr11 | 115954680 | 115955096 |
| chr11 | 115955104 | 115955409 |

|       |           |           |
|-------|-----------|-----------|
| chr11 | 115955409 | 115955916 |
| chr11 | 115956517 | 115956779 |
| chr11 | 115957946 | 115958692 |
| chr11 | 115964671 | 115964961 |
| chr11 | 115964961 | 115965391 |
| chr11 | 115970368 | 115970640 |
| chr11 | 115971002 | 115971403 |
| chr11 | 115974394 | 115974725 |
| chr11 | 115974725 | 115975131 |
| chr11 | 115975131 | 115975380 |
| chr11 | 115975577 | 115975885 |
| chr11 | 115976491 | 115976716 |
| chr11 | 115986613 | 115986799 |
| chr11 | 115987110 | 115987276 |
| chr11 | 115993009 | 115993310 |
| chr11 | 115998407 | 115998632 |
| chr11 | 115999232 | 115999403 |
| chr11 | 115999559 | 115999866 |
| chr11 | 115999883 | 116000052 |
| chr11 | 116000299 | 116000531 |
| chr11 | 116005559 | 116005812 |
| chr11 | 116006262 | 116006479 |
| chr11 | 116006481 | 116006645 |
| chr11 | 116012144 | 116012561 |
| chr11 | 116012561 | 116012876 |
| chr11 | 116012876 | 116013148 |
| chr11 | 116018137 | 116018548 |
| chr11 | 116020148 | 116020311 |
| chr11 | 116023744 | 116024059 |
| chr11 | 116024059 | 116024423 |
| chr11 | 116024423 | 116024871 |
| chr11 | 116029999 | 116030396 |
| chr11 | 116030396 | 116030838 |
| chr11 | 116030907 | 116031143 |
| chr11 | 116042434 | 116042713 |
| chr11 | 116042850 | 116043027 |
| chr11 | 116043375 | 116043598 |
| chr11 | 116044365 | 116044575 |
| chr11 | 116049679 | 116050015 |
| chr11 | 116050015 | 116050318 |
| chr11 | 116050768 | 116050923 |
| chr11 | 116057274 | 116057458 |



|       |           |           |
|-------|-----------|-----------|
| chr11 | 116058068 | 116058275 |
| chr11 | 116059295 | 116059678 |
| chr11 | 116059799 | 116059986 |
| chr11 | 116060697 | 116060962 |
| chr11 | 116070284 | 116070560 |
| chr11 | 116071481 | 116071832 |
| chr11 | 116072581 | 116072953 |
| chr11 | 116077427 | 116077825 |
| chr11 | 116077825 | 116078266 |
| chr11 | 116078266 | 116078631 |
| chr11 | 116079559 | 116079851 |
| chr11 | 116085841 | 116086023 |
| chr11 | 116086531 | 116086877 |
| chr11 | 116086877 | 116087318 |
| chr11 | 116087461 | 116087914 |
| chr11 | 116096841 | 116097063 |
| chr11 | 116098653 | 116099014 |
| chr11 | 116103599 | 116103884 |
| chr11 | 116103976 | 116104590 |
| chr11 | 116108520 | 116108670 |
| chr11 | 116108707 | 116109124 |
| chr11 | 116109124 | 116109538 |
| chr11 | 116109538 | 116109982 |
| chr11 | 116110080 | 116110434 |
| chr11 | 116113921 | 116114245 |
| chr11 | 116121860 | 116122238 |
| chr11 | 116123941 | 116124390 |
| chr11 | 116130159 | 116130464 |
| chr11 | 116130464 | 116130871 |
| chr11 | 116130871 | 116131295 |
| chr11 | 116131319 | 116131477 |
| chr11 | 116132334 | 116132546 |
| chr11 | 116132546 | 116132819 |
| chr11 | 116132819 | 116133067 |
| chr11 | 116133067 | 116133278 |
| chr11 | 116138465 | 116138784 |
| chr11 | 116138784 | 116139192 |
| chr11 | 116142598 | 116143007 |
| chr11 | 116145294 | 116145646 |
| chr11 | 116145646 | 116146010 |
| chr11 | 116146202 | 116146703 |
| chr11 | 116154125 | 116154524 |

|       |           |           |
|-------|-----------|-----------|
| chr11 | 116162349 | 116162518 |
| chr11 | 116167318 | 116167505 |
| chr11 | 116167838 | 116168099 |
| chr11 | 116168099 | 116168458 |
| chr11 | 116174790 | 116175133 |
| chr11 | 116176046 | 116176393 |
| chr11 | 116185920 | 116186107 |
| chr11 | 116198563 | 116198951 |
| chr11 | 116198951 | 116199257 |
| chr11 | 116199257 | 116199523 |
| chr11 | 116216581 | 116217045 |
| chr11 | 116217927 | 116218527 |
| chr11 | 116218527 | 116219253 |
| chr11 | 116219981 | 116220219 |
| chr11 | 116226480 | 116226788 |
| chr11 | 116228604 | 116229364 |
| chr11 | 116237063 | 116237236 |
| chr11 | 116237764 | 116238029 |
| chr11 | 116238029 | 116238595 |
| chr11 | 116247630 | 116247800 |
| chr11 | 116251372 | 116251601 |
| chr11 | 116251601 | 116251817 |
| chr11 | 116254628 | 116255017 |
| chr11 | 116255017 | 116255384 |
| chr11 | 116256061 | 116256349 |
| chr11 | 116256349 | 116256642 |
| chr11 | 116260341 | 116260761 |
| chr11 | 116273013 | 116273216 |
| chr11 | 116273542 | 116273779 |
| chr11 | 116273779 | 116274023 |
| chr11 | 116274023 | 116274361 |
| chr11 | 116274361 | 116274723 |
| chr11 | 116281086 | 116281321 |
| chr11 | 116281321 | 116281559 |
| chr11 | 116281559 | 116281934 |
| chr11 | 116282183 | 116282408 |
| chr11 | 116282957 | 116283333 |
| chr11 | 116286749 | 116287015 |
| chr11 | 116287015 | 116287317 |
| chr11 | 116294294 | 116294709 |
| chr11 | 116294753 | 116294904 |
| chr11 | 116306081 | 116306568 |

|       |           |           |
|-------|-----------|-----------|
| chr11 | 116306568 | 116307031 |
| chr11 | 116307888 | 116308126 |
| chr11 | 116318848 | 116319044 |
| chr11 | 116319044 | 116319368 |
| chr11 | 116319368 | 116319773 |
| chr11 | 116325423 | 116325625 |
| chr11 | 116327300 | 116327555 |
| chr11 | 116332565 | 116332896 |
| chr11 | 116333419 | 116333998 |
| chr11 | 116333998 | 116334332 |
| chr11 | 116335302 | 116335676 |
| chr11 | 116335676 | 116336012 |
| chr11 | 116344625 | 116344848 |
| chr11 | 116346705 | 116346884 |
| chr11 | 116347706 | 116347924 |
| chr11 | 116347926 | 116348239 |
| chr11 | 116351356 | 116351614 |
| chr11 | 116368139 | 116368468 |
| chr11 | 116372004 | 116372204 |
| chr11 | 116377425 | 116377707 |
| chr11 | 116387713 | 116388065 |
| chr11 | 116388771 | 116388962 |
| chr11 | 116388962 | 116389222 |
| chr11 | 116389222 | 116389651 |
| chr11 | 116390519 | 116390782 |
| chr11 | 116390782 | 116391038 |
| chr11 | 116394391 | 116394558 |
| chr11 | 116394855 | 116395110 |
| chr11 | 116412274 | 116412561 |
| chr11 | 116412561 | 116412881 |
| chr11 | 116412881 | 116413234 |
| chr11 | 116413234 | 116413686 |
| chr11 | 116416231 | 116416412 |
| chr11 | 116420490 | 116420746 |
| chr11 | 116421190 | 116421625 |
| chr11 | 116426879 | 116427046 |
| chr11 | 116431822 | 116432018 |
| chr11 | 116433639 | 116434420 |
| chr11 | 116434610 | 116434846 |
| chr11 | 116439646 | 116439989 |
| chr11 | 116440377 | 116440626 |
| chr11 | 116440760 | 116440929 |

|       |           |           |
|-------|-----------|-----------|
| chr11 | 116445727 | 116446063 |
| chr11 | 116446063 | 116446301 |
| chr11 | 116446301 | 116446586 |
| chr11 | 116455817 | 116456028 |
| chr11 | 116456028 | 116456137 |
| chr11 | 116456245 | 116456928 |
| chr11 | 116457018 | 116457184 |
| chr11 | 116457328 | 116457718 |
| chr11 | 116457756 | 116458005 |
| chr11 | 116463610 | 116463895 |
| chr11 | 116463895 | 116464238 |
| chr11 | 116471070 | 116471223 |
| chr11 | 116489645 | 116490124 |
| chr11 | 116490124 | 116490511 |
| chr11 | 116490517 | 116490758 |
| chr11 | 116490758 | 116490962 |
| chr11 | 116493900 | 116494138 |
| chr11 | 116500590 | 116500751 |
| chr11 | 116500751 | 116500996 |
| chr11 | 116500996 | 116501323 |
| chr11 | 116501323 | 116501595 |
| chr11 | 116513066 | 116513418 |
| chr11 | 116513622 | 116513890 |
| chr11 | 116515755 | 116515988 |
| chr11 | 116518498 | 116518850 |
| chr11 | 116521912 | 116522139 |
| chr11 | 116522139 | 116522451 |
| chr11 | 116522463 | 116522649 |
| chr11 | 116522796 | 116523153 |
| chr11 | 116523399 | 116524189 |
| chr11 | 116531784 | 116531939 |
| chr11 | 116532294 | 116532514 |
| chr11 | 116532514 | 116532744 |
| chr11 | 116532802 | 116533367 |
| chr11 | 116533367 | 116533612 |
| chr11 | 116533612 | 116533826 |
| chr11 | 116533826 | 116534186 |
| chr11 | 116534186 | 116534569 |
| chr11 | 116541185 | 116541524 |
| chr11 | 116543195 | 116543494 |
| chr11 | 116543880 | 116544107 |
| chr11 | 116549206 | 116549468 |

|       |           |           |
|-------|-----------|-----------|
| chr11 | 116554543 | 116554810 |
| chr11 | 116555741 | 116556015 |
| chr11 | 116565342 | 116565580 |
| chr11 | 116571707 | 116571857 |
| chr11 | 116571900 | 116572118 |
| chr11 | 116572118 | 116572337 |
| chr11 | 116572710 | 116572867 |
| chr11 | 116573225 | 116573454 |
| chr11 | 116575226 | 116575461 |
| chr11 | 116575461 | 116575702 |
| chr11 | 116580048 | 116580338 |
| chr11 | 116580747 | 116581236 |
| chr11 | 116581236 | 116581782 |
| chr11 | 116586818 | 116587121 |
| chr11 | 116587121 | 116587448 |
| chr11 | 116592066 | 116592305 |
| chr11 | 116592430 | 116592795 |
| chr11 | 116603363 | 116603662 |
| chr11 | 116605487 | 116605701 |
| chr11 | 116615662 | 116616112 |
| chr11 | 116616112 | 116616618 |
| chr11 | 116616618 | 116617038 |
| chr11 | 116617196 | 116617346 |
| chr11 | 116621180 | 116621741 |
| chr11 | 116623361 | 116623548 |
| chr11 | 116623904 | 116624141 |
| chr11 | 116624141 | 116624472 |
| chr11 | 116625731 | 116625901 |
| chr11 | 116628884 | 116629140 |
| chr11 | 116632330 | 116632607 |
| chr11 | 116632996 | 116633275 |
| chr11 | 116634319 | 116634651 |
| chr11 | 116635719 | 116635911 |
| chr11 | 116643280 | 116643627 |
| chr11 | 116646184 | 116646495 |
| chr11 | 116653671 | 116653875 |
| chr11 | 116653875 | 116654068 |
| chr11 | 116657636 | 116657895 |
| chr11 | 116657895 | 116658221 |
| chr11 | 116671077 | 116671389 |
| chr11 | 116671389 | 116671716 |
| chr11 | 116671716 | 116671981 |

|       |           |           |
|-------|-----------|-----------|
| chr11 | 116672692 | 116672890 |
| chr11 | 116677644 | 116678204 |
| chr11 | 116681964 | 116682407 |
| chr11 | 116682423 | 116682628 |
| chr11 | 116682717 | 116683081 |
| chr11 | 116683276 | 116683511 |
| chr11 | 116683822 | 116684064 |
| chr11 | 116694288 | 116694558 |
| chr11 | 116694558 | 116695075 |
| chr11 | 116695231 | 116695440 |
| chr11 | 116701304 | 116701618 |
| chr11 | 116701618 | 116701981 |
| chr11 | 116712676 | 116712873 |
| chr11 | 116745706 | 116746070 |
| chr11 | 116746070 | 116746288 |
| chr11 | 116751110 | 116751260 |
| chr11 | 116754146 | 116754412 |
| chr11 | 116755215 | 116755503 |
| chr11 | 116782690 | 116783019 |
| chr11 | 116807232 | 116807566 |
| chr11 | 116808135 | 116808529 |
| chr11 | 116808529 | 116808747 |
| chr11 | 116811337 | 116811529 |
| chr11 | 116816824 | 116817198 |
| chr11 | 116818812 | 116819091 |
| chr11 | 116821138 | 116821579 |
| chr11 | 116826574 | 116826872 |
| chr11 | 116827494 | 116827842 |
| chr11 | 116827842 | 116828213 |
| chr11 | 116835451 | 116835603 |
| chr11 | 116836366 | 116836595 |
| chr11 | 116836595 | 116836788 |
| chr11 | 116837537 | 116837699 |
| chr11 | 116842779 | 116843198 |
| chr11 | 116843198 | 116843999 |
| chr11 | 116852310 | 116852769 |
| chr11 | 116852769 | 116853196 |
| chr11 | 116853196 | 116853546 |
| chr11 | 116853546 | 116853907 |
| chr11 | 116853933 | 116854089 |
| chr11 | 116862784 | 116862977 |
| chr11 | 116869191 | 116869613 |

|       |           |           |
|-------|-----------|-----------|
| chr11 | 116869659 | 116869947 |
| chr11 | 116878517 | 116878810 |
| chr11 | 116885262 | 116885700 |
| chr11 | 116885700 | 116886073 |
| chr11 | 116893745 | 116893964 |
| chr11 | 116893964 | 116894302 |
| chr11 | 116902553 | 116902947 |
| chr11 | 116905830 | 116906064 |
| chr11 | 116906121 | 116906355 |
| chr11 | 116906401 | 116906592 |
| chr11 | 116913094 | 116913407 |
| chr11 | 116918633 | 116918975 |
| chr11 | 116922097 | 116922661 |
| chr11 | 116940519 | 116940916 |
| chr11 | 116940916 | 116941251 |
| chr11 | 116949752 | 116950149 |
| chr11 | 116958727 | 116958899 |
| chr11 | 116968189 | 116968366 |
| chr11 | 116968484 | 116968652 |
| chr11 | 116973565 | 116973736 |
| chr11 | 116974579 | 116974851 |
| chr11 | 116982616 | 116982767 |
| chr11 | 116986044 | 116986216 |
| chr11 | 116987039 | 116987260 |
| chr11 | 117004398 | 117004565 |
| chr11 | 117018336 | 117018838 |
| chr11 | 117031418 | 117031621 |
| chr11 | 117038303 | 117038593 |
| chr11 | 117043402 | 117043565 |
| chr11 | 117043573 | 117043855 |
| chr11 | 117043871 | 117044073 |
| chr11 | 117052856 | 117053170 |
| chr11 | 117056802 | 117057192 |
| chr11 | 117057192 | 117057380 |
| chr11 | 117057542 | 117057804 |
| chr11 | 117062797 | 117063201 |
| chr11 | 117072162 | 117072633 |
| chr11 | 117075116 | 117075306 |
| chr11 | 117076481 | 117076885 |
| chr11 | 117076885 | 117077071 |
| chr11 | 117077131 | 117077292 |
| chr11 | 117080417 | 117080610 |

|       |           |           |
|-------|-----------|-----------|
| chr11 | 117080987 | 117081137 |
| chr11 | 117081193 | 117081599 |
| chr11 | 117081643 | 117082137 |
| chr11 | 117082465 | 117082710 |
| chr11 | 117089954 | 117090490 |
| chr11 | 117091489 | 117091794 |
| chr11 | 117091794 | 117092161 |
| chr11 | 117094253 | 117094477 |
| chr11 | 117098104 | 117098443 |
| chr11 | 117098623 | 117098891 |
| chr11 | 117098891 | 117099151 |
| chr11 | 117099380 | 117099685 |
| chr11 | 117100277 | 117100483 |
| chr11 | 117103645 | 117103822 |
| chr11 | 117104034 | 117104323 |
| chr11 | 117105017 | 117105241 |
| chr11 | 117108681 | 117108905 |
| chr11 | 117109240 | 117109501 |
| chr11 | 117114105 | 117114492 |
| chr11 | 117114492 | 117114828 |
| chr11 | 117114828 | 117115093 |
| chr11 | 117115093 | 117115410 |
| chr11 | 117115410 | 117115731 |
| chr11 | 117115897 | 117116084 |
| chr11 | 117122880 | 117123256 |
| chr11 | 117123897 | 117124215 |
| chr11 | 117134549 | 117134765 |
| chr11 | 117141726 | 117141983 |
| chr11 | 117145882 | 117146035 |
| chr11 | 117153933 | 117154464 |
| chr11 | 117154464 | 117154690 |
| chr11 | 117159353 | 117159565 |
| chr11 | 117160068 | 117160228 |
| chr11 | 117163004 | 117163289 |
| chr11 | 117170255 | 117170537 |
| chr11 | 117176247 | 117176715 |
| chr11 | 117176897 | 117177302 |
| chr11 | 117177302 | 117177649 |
| chr11 | 117194479 | 117194647 |
| chr11 | 117198125 | 117198590 |
| chr11 | 117199302 | 117199791 |
| chr11 | 117199791 | 117200133 |



|       |           |           |
|-------|-----------|-----------|
| chr11 | 117205004 | 117205424 |
| chr11 | 117205424 | 117205810 |
| chr11 | 117207845 | 117208348 |
| chr11 | 117211896 | 117212067 |
| chr11 | 117216791 | 117217165 |
| chr11 | 117217241 | 117217443 |
| chr11 | 117224889 | 117225117 |
| chr11 | 117225117 | 117225261 |
| chr11 | 117231471 | 117231996 |
| chr11 | 117238207 | 117238510 |
| chr11 | 117239647 | 117239946 |
| chr11 | 117240982 | 117241132 |
| chr11 | 117241413 | 117241578 |
| chr11 | 117248731 | 117249014 |
| chr11 | 117251771 | 117252154 |
| chr11 | 117254736 | 117255071 |
| chr11 | 117255878 | 117256312 |
| chr11 | 117256312 | 117256578 |
| chr11 | 117259531 | 117259990 |
| chr11 | 117260659 | 117260955 |
| chr11 | 117263123 | 117263360 |
| chr11 | 117264615 | 117264765 |
| chr11 | 117265235 | 117265583 |
| chr11 | 117265718 | 117265873 |
| chr11 | 117265991 | 117266419 |
| chr11 | 117267510 | 117267715 |
| chr11 | 117268759 | 117268959 |
| chr11 | 117269399 | 117269680 |
| chr11 | 117269908 | 117270207 |
| chr11 | 117275892 | 117276445 |
| chr11 | 117284641 | 117284800 |
| chr11 | 117285043 | 117285327 |
| chr11 | 117292427 | 117292954 |
| chr11 | 117299755 | 117300154 |
| chr11 | 117305513 | 117305853 |
| chr11 | 117305853 | 117306075 |
| chr11 | 117307965 | 117308252 |
| chr11 | 117310847 | 117311117 |
| chr11 | 117311117 | 117311417 |
| chr11 | 117312734 | 117313003 |
| chr11 | 117313070 | 117313280 |
| chr11 | 117314027 | 117314353 |

|       |           |           |
|-------|-----------|-----------|
| chr11 | 117314982 | 117315229 |
| chr11 | 117315229 | 117315589 |
| chr11 | 117316635 | 117316827 |
| chr11 | 117318830 | 117319211 |
| chr11 | 117320155 | 117320305 |
| chr11 | 117320580 | 117320922 |
| chr11 | 117322842 | 117323048 |
| chr11 | 117324201 | 117324383 |
| chr11 | 117330291 | 117330473 |
| chr11 | 117331209 | 117331779 |
| chr11 | 117334176 | 117334376 |
| chr11 | 117338307 | 117338532 |
| chr11 | 117338532 | 117338799 |
| chr11 | 117338799 | 117339008 |
| chr11 | 117350651 | 117350886 |
| chr11 | 117352952 | 117353511 |
| chr11 | 117357577 | 117357727 |
| chr11 | 117358262 | 117358622 |
| chr11 | 117359210 | 117359638 |
| chr11 | 117359960 | 117360188 |
| chr11 | 117365463 | 117365669 |
| chr11 | 117366520 | 117366756 |
| chr11 | 117366934 | 117367192 |
| chr11 | 117374403 | 117374630 |
| chr11 | 117374641 | 117374933 |
| chr11 | 117376650 | 117376849 |
| chr11 | 117384729 | 117384950 |
| chr11 | 117384950 | 117385242 |
| chr11 | 117390007 | 117390553 |
| chr11 | 117391153 | 117391329 |
| chr11 | 117394490 | 117394826 |
| chr11 | 117397810 | 117398093 |
| chr11 | 117407700 | 117407869 |
| chr11 | 117413340 | 117413496 |
| chr11 | 117414412 | 117414635 |
| chr11 | 117414894 | 117415158 |
| chr11 | 117416031 | 117416233 |
| chr11 | 117417332 | 117417487 |
| chr11 | 117425558 | 117425772 |
| chr11 | 117425898 | 117426274 |
| chr11 | 117431054 | 117431268 |
| chr11 | 117435897 | 117436168 |

|       |           |           |
|-------|-----------|-----------|
| chr11 | 117436757 | 117437014 |
| chr11 | 117442449 | 117442756 |
| chr11 | 117446774 | 117447038 |
| chr11 | 117460066 | 117460264 |
| chr11 | 117463595 | 117463949 |
| chr11 | 117475716 | 117475962 |
| chr11 | 117482523 | 117483034 |
| chr11 | 117483034 | 117483513 |
| chr11 | 117489463 | 117489807 |
| chr11 | 117490405 | 117490628 |
| chr11 | 117495228 | 117495387 |
| chr11 | 117498922 | 117499192 |
| chr11 | 117534962 | 117535190 |
| chr11 | 117536554 | 117536941 |
| chr11 | 117536941 | 117537273 |
| chr11 | 117541691 | 117541919 |
| chr11 | 117545117 | 117545271 |
| chr11 | 117554554 | 117554772 |
| chr11 | 117557435 | 117557641 |
| chr11 | 117558086 | 117558295 |
| chr11 | 117568312 | 117568639 |
| chr11 | 117568639 | 117569155 |
| chr11 | 117596245 | 117596535 |
| chr11 | 117596981 | 117597133 |
| chr11 | 117598136 | 117598397 |
| chr11 | 117598638 | 117598788 |
| chr11 | 117598878 | 117599169 |
| chr11 | 117599543 | 117599705 |
| chr11 | 117611068 | 117611525 |
| chr11 | 117628409 | 117628588 |
| chr11 | 117631242 | 117631549 |
| chr11 | 117632805 | 117632992 |
| chr11 | 117632992 | 117633164 |
| chr11 | 117642317 | 117642499 |
| chr11 | 117653967 | 117654430 |
| chr11 | 117654430 | 117654840 |
| chr11 | 117654840 | 117655214 |
| chr11 | 117655214 | 117655503 |
| chr11 | 117655503 | 117655685 |
| chr11 | 117655969 | 117656126 |
| chr11 | 117660958 | 117661339 |
| chr11 | 117672517 | 117672757 |

|       |           |           |
|-------|-----------|-----------|
| chr11 | 117674618 | 117674784 |
| chr11 | 117678861 | 117679050 |
| chr11 | 117685390 | 117685940 |
| chr11 | 117685949 | 117686273 |
| chr11 | 117686273 | 117686519 |
| chr11 | 117709430 | 117709654 |
| chr11 | 117712072 | 117712382 |
| chr11 | 117723415 | 117723783 |
| chr11 | 117735994 | 117736314 |
| chr11 | 117736314 | 117736687 |
| chr11 | 117740103 | 117740328 |
| chr11 | 117755256 | 117755600 |
| chr11 | 117768751 | 117769049 |
| chr11 | 117769049 | 117769289 |
| chr11 | 117778928 | 117779197 |
| chr11 | 117779552 | 117779836 |
| chr11 | 117779997 | 117780249 |
| chr11 | 117780249 | 117780570 |
| chr11 | 117780570 | 117780875 |
| chr11 | 117780875 | 117781349 |
| chr11 | 117781349 | 117781889 |
| chr11 | 117788464 | 117788749 |
| chr11 | 117790309 | 117790644 |
| chr11 | 117790644 | 117791183 |
| chr11 | 117791232 | 117791415 |
| chr11 | 117792187 | 117792602 |
| chr11 | 117797988 | 117798205 |
| chr11 | 117801260 | 117801528 |
| chr11 | 117808699 | 117808872 |
| chr11 | 117809539 | 117809913 |
| chr11 | 117809913 | 117810355 |
| chr11 | 117810355 | 117810754 |
| chr11 | 117810754 | 117811066 |
| chr11 | 117816413 | 117816765 |
| chr11 | 117816765 | 117817110 |
| chr11 | 117822704 | 117823369 |
| chr11 | 117824119 | 117824523 |
| chr11 | 117824523 | 117824882 |
| chr11 | 117825418 | 117825582 |
| chr11 | 117825723 | 117826090 |
| chr11 | 117826232 | 117826485 |
| chr11 | 117827508 | 117827829 |

|       |           |           |
|-------|-----------|-----------|
| chr11 | 117828229 | 117828441 |
| chr11 | 117830478 | 117830667 |
| chr11 | 117831645 | 117831802 |
| chr11 | 117832110 | 117832431 |
| chr11 | 117832431 | 117832849 |
| chr11 | 117838547 | 117838821 |
| chr11 | 117843136 | 117843486 |
| chr11 | 117843486 | 117843793 |
| chr11 | 117843793 | 117844031 |
| chr11 | 117846679 | 117846994 |
| chr11 | 117848579 | 117848799 |
| chr11 | 117848799 | 117849054 |
| chr11 | 117849054 | 117849400 |
| chr11 | 117849400 | 117849761 |
| chr11 | 117857610 | 117858122 |
| chr11 | 117859067 | 117859548 |
| chr11 | 117870714 | 117871006 |
| chr11 | 117872987 | 117873286 |
| chr11 | 117873286 | 117873608 |
| chr11 | 117877963 | 117878210 |
| chr11 | 117879676 | 117880029 |
| chr11 | 117890584 | 117890879 |
| chr11 | 117890879 | 117891134 |
| chr11 | 117896714 | 117896999 |
| chr11 | 117904942 | 117905205 |
| chr11 | 117912711 | 117913005 |
| chr11 | 117913005 | 117913537 |
| chr11 | 117914559 | 117914884 |
| chr11 | 117924525 | 117925000 |
| chr11 | 117932079 | 117932786 |
| chr11 | 117934034 | 117934575 |
| chr11 | 117936295 | 117936576 |
| chr11 | 117939730 | 117940038 |
| chr11 | 117941381 | 117941863 |
| chr11 | 117941863 | 117942273 |
| chr11 | 117948939 | 117949167 |
| chr11 | 117949321 | 117949711 |
| chr11 | 117949711 | 117950206 |
| chr11 | 117951163 | 117951417 |
| chr11 | 117952238 | 117952523 |
| chr11 | 117954262 | 117954422 |
| chr11 | 117958032 | 117958616 |

|       |           |           |
|-------|-----------|-----------|
| chr11 | 117962388 | 117962909 |
| chr11 | 117963157 | 117963598 |
| chr11 | 117963598 | 117963999 |
| chr11 | 117966479 | 117966761 |
| chr11 | 117968797 | 117969132 |
| chr11 | 117969132 | 117969446 |
| chr11 | 117969446 | 117969793 |
| chr11 | 117969793 | 117970201 |
| chr11 | 117976098 | 117976394 |
| chr11 | 117979415 | 117979660 |
| chr11 | 117983803 | 117983965 |
| chr11 | 117986693 | 117986980 |
| chr11 | 117987043 | 117987422 |
| chr11 | 117987843 | 117988246 |
| chr11 | 117989904 | 117990212 |
| chr11 | 117990212 | 117990409 |
| chr11 | 117990618 | 117990935 |
| chr11 | 117991661 | 117992139 |
| chr11 | 117995312 | 117995617 |
| chr11 | 117998388 | 117998691 |
| chr11 | 117999649 | 117999853 |
| chr11 | 118000571 | 118000836 |
| chr11 | 118003006 | 118003508 |
| chr11 | 118003792 | 118004065 |
| chr11 | 118007386 | 118007834 |
| chr11 | 118009965 | 118010131 |
| chr11 | 118010314 | 118010496 |
| chr11 | 118012421 | 118013146 |
| chr11 | 118021476 | 118021634 |
| chr11 | 118021634 | 118021790 |
| chr11 | 118021851 | 118022113 |
| chr11 | 118032971 | 118033263 |
| chr11 | 118033263 | 118033677 |
| chr11 | 118034027 | 118034320 |
| chr11 | 118034375 | 118034642 |
| chr11 | 118038317 | 118038524 |
| chr11 | 118043207 | 118043563 |
| chr11 | 118043911 | 118044087 |
| chr11 | 118049645 | 118049966 |
| chr11 | 118052126 | 118052339 |
| chr11 | 118064528 | 118064678 |
| chr11 | 118069787 | 118069941 |

|       |           |           |
|-------|-----------|-----------|
| chr11 | 118072685 | 118072918 |
| chr11 | 118075714 | 118075924 |
| chr11 | 118083872 | 118084133 |
| chr11 | 118084202 | 118084399 |
| chr11 | 118091071 | 118091318 |
| chr11 | 118102807 | 118103268 |
| chr11 | 118103952 | 118104360 |
| chr11 | 118115999 | 118116159 |
| chr11 | 118118905 | 118119073 |
| chr11 | 118120728 | 118120900 |
| chr11 | 118126958 | 118127146 |
| chr11 | 118130015 | 118130267 |
| chr11 | 118133694 | 118134073 |
| chr11 | 118134751 | 118134923 |
| chr11 | 118135402 | 118135593 |
| chr11 | 118135694 | 118136069 |
| chr11 | 118136069 | 118136357 |
| chr11 | 118145695 | 118146378 |
| chr11 | 118152805 | 118153508 |
| chr11 | 118153624 | 118153918 |
| chr11 | 118160580 | 118161077 |
| chr11 | 118161077 | 118161320 |
| chr11 | 118161320 | 118161548 |
| chr11 | 118166671 | 118166859 |
| chr11 | 118180294 | 118180489 |
| chr11 | 118187398 | 118187993 |
| chr11 | 118193282 | 118193782 |
| chr11 | 118193782 | 118194144 |
| chr11 | 118194340 | 118194490 |
| chr11 | 118194894 | 118195142 |
| chr11 | 118200275 | 118200467 |
| chr11 | 118201327 | 118201556 |
| chr11 | 118201556 | 118201789 |
| chr11 | 118202629 | 118202779 |
| chr11 | 118211853 | 118212061 |
| chr11 | 118212620 | 118213122 |
| chr11 | 118215857 | 118216460 |
| chr11 | 118216566 | 118216751 |
| chr11 | 118232285 | 118232550 |
| chr11 | 118233710 | 118233959 |
| chr11 | 118233959 | 118234409 |
| chr11 | 118247457 | 118247697 |

|       |           |           |
|-------|-----------|-----------|
| chr11 | 118247697 | 118247918 |
| chr11 | 118248125 | 118248695 |
| chr11 | 118248695 | 118249049 |
| chr11 | 118249049 | 118249359 |
| chr11 | 118257877 | 118258148 |
| chr11 | 118264341 | 118264747 |
| chr11 | 118269927 | 118270155 |
| chr11 | 118274443 | 118274605 |
| chr11 | 118276295 | 118276536 |
| chr11 | 118279390 | 118279556 |
| chr11 | 118279556 | 118279697 |
| chr11 | 118280281 | 118280590 |
| chr11 | 118289034 | 118289223 |
| chr11 | 118289653 | 118289998 |
| chr11 | 118289998 | 118290595 |
| chr11 | 118298818 | 118299242 |
| chr11 | 118299242 | 118299617 |
| chr11 | 118300723 | 118300966 |
| chr11 | 118317148 | 118317487 |
| chr11 | 118318697 | 118318877 |
| chr11 | 118322099 | 118322320 |
| chr11 | 118327115 | 118327580 |
| chr11 | 118327580 | 118328006 |
| chr11 | 118328556 | 118328813 |
| chr11 | 118329412 | 118329591 |
| chr11 | 118330057 | 118330344 |
| chr11 | 118337579 | 118337744 |
| chr11 | 118337852 | 118338160 |
| chr11 | 118342450 | 118342852 |
| chr11 | 118346629 | 118347173 |
| chr11 | 118348870 | 118349197 |
| chr11 | 118349197 | 118349478 |
| chr11 | 118349478 | 118349898 |
| chr11 | 118354849 | 118355260 |
| chr11 | 118355260 | 118355730 |
| chr11 | 118360524 | 118360996 |
| chr11 | 118360996 | 118361453 |
| chr11 | 118362956 | 118363245 |
| chr11 | 118363245 | 118363567 |
| chr11 | 118365140 | 118365583 |
| chr11 | 118366197 | 118366378 |
| chr11 | 118376391 | 118376713 |



|       |           |           |
|-------|-----------|-----------|
| chr11 | 118379209 | 118379572 |
| chr11 | 118379572 | 118379981 |
| chr11 | 118401696 | 118401971 |
| chr11 | 118401971 | 118402337 |
| chr11 | 118409537 | 118410354 |
| chr11 | 118410456 | 118410815 |
| chr11 | 118416061 | 118416526 |
| chr11 | 118418495 | 118418803 |
| chr11 | 118418803 | 118419050 |
| chr11 | 118419050 | 118419298 |
| chr11 | 118419342 | 118419520 |
| chr11 | 118423353 | 118423565 |
| chr11 | 118427386 | 118427588 |
| chr11 | 118430247 | 118430509 |
| chr11 | 118430509 | 118430797 |
| chr11 | 118430797 | 118431228 |
| chr11 | 118431228 | 118431730 |
| chr11 | 118433309 | 118433769 |
| chr11 | 118436449 | 118436622 |
| chr11 | 118436622 | 118436807 |
| chr11 | 118443229 | 118443703 |
| chr11 | 118445913 | 118446174 |
| chr11 | 118454198 | 118454585 |
| chr11 | 118457148 | 118457309 |
| chr11 | 118470193 | 118470475 |
| chr11 | 118476662 | 118477386 |
| chr11 | 118483390 | 118483570 |
| chr11 | 118488105 | 118488511 |
| chr11 | 118490889 | 118491138 |
| chr11 | 118499890 | 118500176 |
| chr11 | 118507923 | 118508239 |
| chr11 | 118515716 | 118515892 |
| chr11 | 118517978 | 118518292 |
| chr11 | 118523744 | 118524277 |
| chr11 | 118534737 | 118535032 |
| chr11 | 118540193 | 118541062 |
| chr11 | 118546320 | 118546578 |
| chr11 | 118550892 | 118551062 |
| chr11 | 118570636 | 118570920 |
| chr11 | 118573619 | 118573841 |
| chr11 | 118584832 | 118585121 |
| chr11 | 118599382 | 118599581 |

|       |           |           |
|-------|-----------|-----------|
| chr11 | 118599581 | 118599805 |
| chr11 | 118603185 | 118603448 |
| chr11 | 118631647 | 118631922 |
| chr11 | 118632570 | 118632758 |
| chr11 | 118634738 | 118634888 |
| chr11 | 118648423 | 118648600 |
| chr11 | 118648600 | 118648795 |
| chr11 | 118659385 | 118659644 |
| chr11 | 118724339 | 118724597 |
| chr11 | 118729430 | 118729672 |
| chr11 | 118737917 | 118738161 |
| chr11 | 118738406 | 118738624 |
| chr11 | 118738781 | 118738972 |
| chr11 | 118738972 | 118739191 |
| chr11 | 118739518 | 118739720 |
| chr11 | 118740027 | 118740296 |
| chr11 | 118742905 | 118743057 |
| chr11 | 118744905 | 118745062 |
| chr11 | 118748783 | 118749051 |
| chr11 | 118752373 | 118752831 |
| chr11 | 118754589 | 118754877 |
| chr11 | 118773021 | 118773246 |
| chr11 | 118775682 | 118775832 |
| chr11 | 118775844 | 118776050 |
| chr11 | 118801443 | 118801628 |
| chr11 | 118826727 | 118826916 |
| chr11 | 118832843 | 118833122 |
| chr11 | 118833122 | 118833420 |
| chr11 | 118851360 | 118851981 |
| chr11 | 118856412 | 118856651 |
| chr11 | 118874846 | 118875155 |
| chr11 | 118875188 | 118875520 |
| chr11 | 118887230 | 118887428 |
| chr11 | 118906710 | 118906903 |
| chr11 | 118911400 | 118911593 |
| chr11 | 118927212 | 118927363 |
| chr11 | 118962507 | 118962917 |
| chr11 | 118971551 | 118971781 |
| chr11 | 118975499 | 118975793 |
| chr11 | 118976034 | 118976288 |
| chr11 | 118981063 | 118981247 |
| chr11 | 118983959 | 118984114 |

|       |           |           |
|-------|-----------|-----------|
| chr11 | 118985576 | 118985785 |
| chr11 | 118985785 | 118985999 |
| chr11 | 118987394 | 118987579 |
| chr11 | 118988382 | 118988532 |
| chr11 | 118997290 | 118997485 |
| chr11 | 118998526 | 118998944 |
| chr11 | 118998944 | 118999147 |
| chr11 | 118999634 | 118999854 |
| chr11 | 118999854 | 119000061 |
| chr11 | 119010256 | 119010446 |
| chr11 | 119011752 | 119012019 |
| chr11 | 119021164 | 119021509 |
| chr11 | 119022677 | 119023126 |
| chr11 | 119023126 | 119023373 |
| chr11 | 119023373 | 119023768 |
| chr11 | 119033997 | 119034216 |
| chr11 | 119034216 | 119034576 |
| chr11 | 119040551 | 119040928 |
| chr11 | 119040928 | 119041302 |
| chr11 | 119041302 | 119041723 |
| chr11 | 119046979 | 119047308 |
| chr11 | 119047308 | 119047658 |
| chr11 | 119051984 | 119052186 |
| chr11 | 119052628 | 119052987 |
| chr11 | 119053200 | 119053614 |
| chr11 | 119054583 | 119054801 |
| chr11 | 119057969 | 119058385 |
| chr11 | 119058397 | 119058550 |
| chr11 | 119058662 | 119058879 |
| chr11 | 119065741 | 119065920 |
| chr11 | 119074303 | 119074482 |
| chr11 | 119085491 | 119086083 |
| chr11 | 119086083 | 119086510 |
| chr11 | 119086510 | 119086826 |
| chr11 | 119090936 | 119091392 |
| chr11 | 119091425 | 119091594 |
| chr11 | 119091604 | 119091895 |
| chr11 | 119098362 | 119098549 |
| chr11 | 119105245 | 119105622 |
| chr11 | 119105777 | 119105968 |
| chr11 | 119107529 | 119108013 |
| chr11 | 119111450 | 119111672 |

|       |           |           |
|-------|-----------|-----------|
| chr11 | 119112768 | 119113342 |
| chr11 | 119115479 | 119115677 |
| chr11 | 119126197 | 119126841 |
| chr11 | 119127128 | 119127677 |
| chr11 | 119127754 | 119128138 |
| chr11 | 119128138 | 119128450 |
| chr11 | 119134021 | 119134323 |
| chr11 | 119136305 | 119136468 |
| chr11 | 119141885 | 119142077 |
| chr11 | 119144744 | 119145062 |
| chr11 | 119151856 | 119152142 |
| chr11 | 119152142 | 119152370 |
| chr11 | 119152370 | 119152766 |
| chr11 | 119159514 | 119159812 |
| chr11 | 119165181 | 119165644 |
| chr11 | 119165809 | 119165971 |
| chr11 | 119166051 | 119166563 |
| chr11 | 119172516 | 119172700 |
| chr11 | 119186395 | 119186748 |
| chr11 | 119187000 | 119187338 |
| chr11 | 119187607 | 119187835 |
| chr11 | 119190141 | 119190446 |
| chr11 | 119190446 | 119190936 |
| chr11 | 119191776 | 119192082 |
| chr11 | 119198983 | 119199187 |
| chr11 | 119203499 | 119203802 |
| chr11 | 119205873 | 119206068 |
| chr11 | 119206594 | 119206924 |
| chr11 | 119206930 | 119207118 |
| chr11 | 119208068 | 119208291 |
| chr11 | 119213197 | 119213431 |
| chr11 | 119214984 | 119215328 |
| chr11 | 119215328 | 119215912 |
| chr11 | 119216053 | 119216461 |
| chr11 | 119228043 | 119228392 |
| chr11 | 119228392 | 119228838 |
| chr11 | 119228852 | 119229373 |
| chr11 | 119235296 | 119235469 |
| chr11 | 119235656 | 119235961 |
| chr11 | 119238071 | 119238245 |
| chr11 | 119238397 | 119238680 |
| chr11 | 119243913 | 119244090 |

|       |           |           |
|-------|-----------|-----------|
| chr11 | 119248717 | 119249022 |
| chr11 | 119249022 | 119249562 |
| chr11 | 119253382 | 119253558 |
| chr11 | 119255667 | 119255934 |
| chr11 | 119256605 | 119256802 |
| chr11 | 119258536 | 119258833 |
| chr11 | 119259033 | 119259334 |
| chr11 | 119267580 | 119268296 |
| chr11 | 119268352 | 119268563 |
| chr11 | 119273257 | 119273518 |
| chr11 | 119273690 | 119273853 |
| chr11 | 119274211 | 119274361 |
| chr11 | 119278539 | 119278790 |
| chr11 | 119281099 | 119281377 |
| chr11 | 119285947 | 119286696 |
| chr11 | 119287147 | 119287476 |
| chr11 | 119299608 | 119299953 |
| chr11 | 119299953 | 119300533 |
| chr11 | 119300648 | 119300874 |
| chr11 | 119304976 | 119305320 |
| chr11 | 119305320 | 119305656 |
| chr11 | 119316546 | 119317081 |
| chr11 | 119317081 | 119317493 |
| chr11 | 119325158 | 119325540 |
| chr11 | 119330326 | 119331287 |
| chr11 | 119338603 | 119339120 |
| chr11 | 119339120 | 119339504 |
| chr11 | 119339504 | 119339714 |
| chr11 | 119339746 | 119340049 |
| chr11 | 119345003 | 119345286 |
| chr11 | 119350534 | 119351086 |
| chr11 | 119354895 | 119355071 |
| chr11 | 119355243 | 119355847 |
| chr11 | 119355869 | 119356075 |
| chr11 | 119356142 | 119356431 |
| chr11 | 119363384 | 119363821 |
| chr11 | 119363821 | 119364061 |
| chr11 | 119378607 | 119379015 |
| chr11 | 119389736 | 119390194 |
| chr11 | 119390194 | 119390515 |
| chr11 | 119390515 | 119390769 |
| chr11 | 119390859 | 119391011 |

|       |           |           |
|-------|-----------|-----------|
| chr11 | 119391879 | 119392074 |
| chr11 | 119392074 | 119392349 |
| chr11 | 119392968 | 119393345 |
| chr11 | 119394263 | 119394506 |
| chr11 | 119394842 | 119395071 |
| chr11 | 119402389 | 119402801 |
| chr11 | 119402801 | 119403242 |
| chr11 | 119405750 | 119405913 |
| chr11 | 119408052 | 119408353 |
| chr11 | 119417360 | 119417605 |
| chr11 | 119418292 | 119418450 |
| chr11 | 119428628 | 119428899 |
| chr11 | 119428899 | 119429256 |
| chr11 | 119435980 | 119436197 |
| chr11 | 119436377 | 119436594 |
| chr11 | 119442267 | 119442501 |
| chr11 | 119444689 | 119444863 |
| chr11 | 119458847 | 119459019 |
| chr11 | 119459251 | 119459588 |
| chr11 | 119459588 | 119459906 |
| chr11 | 119483379 | 119483600 |
| chr11 | 119490950 | 119491471 |
| chr11 | 119491471 | 119491740 |
| chr11 | 119491740 | 119491949 |
| chr11 | 119492932 | 119493087 |
| chr11 | 119503040 | 119503256 |
| chr11 | 119503516 | 119503666 |
| chr11 | 119503717 | 119504188 |
| chr11 | 119511799 | 119511950 |
| chr11 | 119516897 | 119517290 |
| chr11 | 119517290 | 119517547 |
| chr11 | 119524508 | 119524987 |
| chr11 | 119526655 | 119526908 |
| chr11 | 119532394 | 119532570 |
| chr11 | 119533889 | 119534090 |
| chr11 | 119534358 | 119534785 |
| chr11 | 119534785 | 119535047 |
| chr11 | 119535627 | 119535824 |
| chr11 | 119540112 | 119540325 |
| chr11 | 119545481 | 119545769 |
| chr11 | 119545973 | 119546128 |
| chr11 | 119546482 | 119546692 |

|       |           |           |
|-------|-----------|-----------|
| chr11 | 119546834 | 119547050 |
| chr11 | 119547166 | 119547498 |
| chr11 | 119547498 | 119547915 |
| chr11 | 119551429 | 119551830 |
| chr11 | 119553186 | 119553549 |
| chr11 | 119554844 | 119555053 |
| chr11 | 119555143 | 119555615 |
| chr11 | 119565775 | 119566023 |
| chr11 | 119571802 | 119571968 |
| chr11 | 119583252 | 119583402 |
| chr11 | 119585399 | 119585569 |
| chr11 | 119594087 | 119594270 |
| chr11 | 119602784 | 119603081 |
| chr11 | 119603081 | 119603327 |
| chr11 | 119603327 | 119603655 |
| chr11 | 119611560 | 119611925 |
| chr11 | 119617677 | 119617827 |
| chr11 | 119618740 | 119619129 |
| chr11 | 119623112 | 119623399 |
| chr11 | 119629515 | 119629760 |
| chr11 | 119631560 | 119631720 |
| chr11 | 119636191 | 119636383 |
| chr11 | 119637617 | 119637840 |
| chr11 | 119644249 | 119644461 |
| chr11 | 119650978 | 119651517 |
| chr11 | 119653311 | 119653691 |
| chr11 | 119657491 | 119657861 |
| chr11 | 119659317 | 119659547 |
| chr11 | 119661520 | 119661790 |
| chr11 | 119665430 | 119665593 |
| chr11 | 119666401 | 119666718 |
| chr11 | 119666718 | 119667028 |
| chr11 | 119675597 | 119675890 |
| chr11 | 119676448 | 119677155 |
| chr11 | 119677155 | 119677447 |
| chr11 | 119683936 | 119684096 |
| chr11 | 119685090 | 119685276 |
| chr11 | 119685535 | 119685692 |
| chr11 | 119685958 | 119686144 |
| chr11 | 119694626 | 119694822 |
| chr11 | 119696029 | 119696395 |
| chr11 | 119696395 | 119696774 |

|       |           |           |
|-------|-----------|-----------|
| chr11 | 119696876 | 119697136 |
| chr11 | 119705431 | 119705706 |
| chr11 | 119706998 | 119707259 |
| chr11 | 119707259 | 119707563 |
| chr11 | 119715802 | 119716484 |
| chr11 | 119717941 | 119718481 |
| chr11 | 119728293 | 119728476 |
| chr11 | 119730581 | 119730796 |
| chr11 | 119732336 | 119732740 |
| chr11 | 119733741 | 119733954 |
| chr11 | 119733954 | 119734178 |
| chr11 | 119747251 | 119747483 |
| chr11 | 119762194 | 119762373 |
| chr11 | 119769755 | 119770026 |
| chr11 | 119777109 | 119777648 |
| chr11 | 119777831 | 119778110 |
| chr11 | 119788757 | 119788978 |
| chr11 | 119788978 | 119789277 |
| chr11 | 119789285 | 119789581 |
| chr11 | 119795892 | 119796441 |
| chr11 | 119796441 | 119796797 |
| chr11 | 119796797 | 119797397 |
| chr11 | 119806316 | 119806537 |
| chr11 | 119806572 | 119806762 |
| chr11 | 119807716 | 119808047 |
| chr11 | 119813519 | 119813679 |
| chr11 | 119813930 | 119814080 |
| chr11 | 119814107 | 119814533 |
| chr11 | 119817404 | 119817848 |
| chr11 | 119817848 | 119818146 |
| chr11 | 119818168 | 119818413 |
| chr11 | 119823842 | 119824004 |
| chr11 | 119824220 | 119824511 |
| chr11 | 119829446 | 119829751 |
| chr11 | 119829883 | 119830240 |
| chr11 | 119834532 | 119834743 |
| chr11 | 119835925 | 119836080 |
| chr11 | 119839490 | 119839656 |
| chr11 | 119840995 | 119841245 |
| chr11 | 119846657 | 119846967 |
| chr11 | 119847154 | 119847374 |
| chr11 | 119856065 | 119856579 |



|       |           |           |
|-------|-----------|-----------|
| chr11 | 119856618 | 119857252 |
| chr11 | 119863111 | 119863338 |
| chr11 | 119863338 | 119863857 |
| chr11 | 119872851 | 119873001 |
| chr11 | 119873451 | 119874023 |
| chr11 | 119894667 | 119895066 |
| chr11 | 119895066 | 119895360 |
| chr11 | 119904651 | 119904927 |
| chr11 | 119904927 | 119905267 |
| chr11 | 119910281 | 119910582 |
| chr11 | 119913252 | 119913594 |
| chr11 | 119913594 | 119913894 |
| chr11 | 119915646 | 119916048 |
| chr11 | 119916110 | 119916475 |
| chr11 | 119916475 | 119916811 |
| chr11 | 119921532 | 119921760 |
| chr11 | 119925249 | 119925504 |
| chr11 | 119933152 | 119933728 |
| chr11 | 119933728 | 119934171 |
| chr11 | 119934171 | 119934511 |
| chr11 | 119935519 | 119935704 |
| chr11 | 119942146 | 119942393 |
| chr11 | 119942393 | 119942698 |
| chr11 | 119942698 | 119942999 |
| chr11 | 119942999 | 119943331 |
| chr11 | 119943331 | 119943624 |
| chr11 | 119945160 | 119945539 |
| chr11 | 119948022 | 119948248 |
| chr11 | 119948256 | 119948858 |
| chr11 | 119954442 | 119954840 |
| chr11 | 119954840 | 119955331 |
| chr11 | 119967716 | 119968326 |
| chr11 | 119969770 | 119970457 |
| chr11 | 119973830 | 119974092 |
| chr11 | 119975716 | 119976102 |
| chr11 | 119976102 | 119976629 |
| chr11 | 119979585 | 119979877 |
| chr11 | 119986950 | 119987157 |
| chr11 | 119987157 | 119987554 |
| chr11 | 119988393 | 119988699 |
| chr11 | 119988774 | 119989583 |
| chr11 | 119991129 | 119991628 |

|       |           |           |
|-------|-----------|-----------|
| chr11 | 119998713 | 119999371 |
| chr11 | 120005876 | 120006080 |
| chr11 | 120007553 | 120007855 |
| chr11 | 120007879 | 120008116 |
| chr11 | 120008116 | 120008362 |
| chr11 | 120008447 | 120008624 |
| chr11 | 120009185 | 120009429 |
| chr11 | 120011870 | 120012027 |
| chr11 | 120012913 | 120013066 |
| chr11 | 120013122 | 120013394 |
| chr11 | 120013394 | 120013781 |
| chr11 | 120022299 | 120022613 |
| chr11 | 120022750 | 120023230 |
| chr11 | 120024932 | 120025082 |
| chr11 | 120029715 | 120030062 |
| chr11 | 120030247 | 120030682 |
| chr11 | 120039638 | 120040039 |
| chr11 | 120040470 | 120040860 |
| chr11 | 120041327 | 120041741 |
| chr11 | 120042245 | 120042507 |
| chr11 | 120042560 | 120042823 |
| chr11 | 120043435 | 120043758 |
| chr11 | 120045889 | 120046093 |
| chr11 | 120049114 | 120049391 |
| chr11 | 120054633 | 120054816 |
| chr11 | 120055505 | 120055677 |
| chr11 | 120056020 | 120056182 |
| chr11 | 120056526 | 120056750 |
| chr11 | 120057097 | 120057247 |
| chr11 | 120063076 | 120063322 |
| chr11 | 120065269 | 120065692 |
| chr11 | 120067545 | 120067740 |
| chr11 | 120067904 | 120068075 |
| chr11 | 120069731 | 120069925 |
| chr11 | 120073284 | 120073595 |
| chr11 | 120086068 | 120086318 |
| chr11 | 120086318 | 120086661 |
| chr11 | 120086661 | 120087153 |
| chr11 | 120092941 | 120093134 |
| chr11 | 120093219 | 120093411 |
| chr11 | 120098403 | 120099006 |
| chr11 | 120099006 | 120099425 |

|       |           |           |
|-------|-----------|-----------|
| chr11 | 120101139 | 120101366 |
| chr11 | 120110562 | 120110822 |
| chr11 | 120111091 | 120111319 |
| chr11 | 120114486 | 120114683 |
| chr11 | 120114683 | 120114854 |
| chr11 | 120116539 | 120116743 |
| chr11 | 120120821 | 120120987 |
| chr11 | 120121961 | 120122391 |
| chr11 | 120122391 | 120122660 |
| chr11 | 120126957 | 120127131 |
| chr11 | 120134745 | 120135087 |
| chr11 | 120135247 | 120135498 |
| chr11 | 120144294 | 120144467 |
| chr11 | 120149855 | 120150131 |
| chr11 | 120150396 | 120150586 |
| chr11 | 120150712 | 120151087 |
| chr11 | 120151087 | 120151629 |
| chr11 | 120159321 | 120159481 |
| chr11 | 120160384 | 120160581 |
| chr11 | 120160581 | 120160821 |
| chr11 | 120163321 | 120163543 |
| chr11 | 120169205 | 120169402 |
| chr11 | 120169402 | 120169652 |
| chr11 | 120169665 | 120169947 |
| chr11 | 120175836 | 120176261 |
| chr11 | 120181495 | 120181738 |
| chr11 | 120189090 | 120189375 |
| chr11 | 120189375 | 120189630 |
| chr11 | 120189630 | 120189926 |
| chr11 | 120189926 | 120190292 |
| chr11 | 120200690 | 120200934 |
| chr11 | 120204415 | 120204613 |
| chr11 | 120204613 | 120204877 |
| chr11 | 120204887 | 120205181 |
| chr11 | 120215674 | 120215871 |
| chr11 | 120222599 | 120222820 |
| chr11 | 120231058 | 120231431 |
| chr11 | 120231431 | 120231809 |
| chr11 | 120232578 | 120233062 |
| chr11 | 120236539 | 120236716 |
| chr11 | 120237251 | 120237464 |
| chr11 | 120239121 | 120239318 |

|       |           |           |
|-------|-----------|-----------|
| chr11 | 120240361 | 120240532 |
| chr11 | 120252485 | 120252698 |
| chr11 | 120252810 | 120253266 |
| chr11 | 120253364 | 120253607 |
| chr11 | 120255095 | 120255569 |
| chr11 | 120256147 | 120256318 |
| chr11 | 120256580 | 120256902 |
| chr11 | 120256902 | 120257300 |
| chr11 | 120261409 | 120261783 |
| chr11 | 120261799 | 120262078 |
| chr11 | 120262078 | 120262385 |
| chr11 | 120262385 | 120262653 |
| chr11 | 120262653 | 120262928 |
| chr11 | 120267331 | 120267479 |
| chr11 | 120267479 | 120267667 |
| chr11 | 120267714 | 120267999 |
| chr11 | 120269421 | 120269723 |
| chr11 | 120271057 | 120271252 |
| chr11 | 120280241 | 120280577 |
| chr11 | 120292409 | 120292571 |
| chr11 | 120293792 | 120294038 |
| chr11 | 120294427 | 120294614 |
| chr11 | 120296801 | 120297150 |
| chr11 | 120297876 | 120298110 |
| chr11 | 120304857 | 120305145 |
| chr11 | 120305145 | 120305590 |
| chr11 | 120307652 | 120307892 |
| chr11 | 120308135 | 120308347 |
| chr11 | 120310607 | 120311291 |
| chr11 | 120315347 | 120315678 |
| chr11 | 120315842 | 120316085 |
| chr11 | 120316085 | 120316392 |
| chr11 | 120316392 | 120316704 |
| chr11 | 120316704 | 120316935 |
| chr11 | 120317019 | 120317239 |
| chr11 | 120334804 | 120335041 |
| chr11 | 120340088 | 120340621 |
| chr11 | 120343872 | 120344035 |
| chr11 | 120345169 | 120345344 |
| chr11 | 120348372 | 120348722 |
| chr11 | 120349502 | 120349819 |
| chr11 | 120349850 | 120350358 |

|       |           |           |
|-------|-----------|-----------|
| chr11 | 120350358 | 120350664 |
| chr11 | 120353479 | 120354054 |
| chr11 | 120354069 | 120354229 |
| chr11 | 120354997 | 120355232 |
| chr11 | 120360089 | 120360450 |
| chr11 | 120360689 | 120361058 |
| chr11 | 120362462 | 120362612 |
| chr11 | 120368623 | 120368899 |
| chr11 | 120369560 | 120369939 |
| chr11 | 120369939 | 120370188 |
| chr11 | 120377632 | 120377823 |
| chr11 | 120378039 | 120378576 |
| chr11 | 120378576 | 120379199 |
| chr11 | 120386088 | 120386273 |
| chr11 | 120392537 | 120392823 |
| chr11 | 120423657 | 120423926 |
| chr11 | 120426749 | 120427087 |
| chr11 | 120437037 | 120437548 |
| chr11 | 120437548 | 120437900 |
| chr11 | 120442836 | 120443107 |
| chr11 | 120446468 | 120446649 |
| chr11 | 120450030 | 120450229 |
| chr11 | 120457485 | 120457753 |
| chr11 | 120457753 | 120457991 |
| chr11 | 120457991 | 120458249 |
| chr11 | 120458249 | 120458572 |
| chr11 | 120459279 | 120459431 |
| chr11 | 120467007 | 120467392 |
| chr11 | 120467392 | 120468131 |
| chr11 | 120468357 | 120468539 |
| chr11 | 120475341 | 120475507 |
| chr11 | 120477120 | 120477360 |
| chr11 | 120484064 | 120484229 |
| chr11 | 120484237 | 120484472 |
| chr11 | 120484472 | 120484744 |
| chr11 | 120484744 | 120485140 |
| chr11 | 120489334 | 120489634 |
| chr11 | 120491651 | 120491986 |
| chr11 | 120491986 | 120492233 |
| chr11 | 120492233 | 120492475 |
| chr11 | 120492475 | 120492828 |
| chr11 | 120492928 | 120493101 |

|       |           |           |
|-------|-----------|-----------|
| chr11 | 120498226 | 120498573 |
| chr11 | 120500185 | 120500342 |
| chr11 | 120500349 | 120500775 |
| chr11 | 120506969 | 120507220 |
| chr11 | 120507471 | 120507839 |
| chr11 | 120507839 | 120508174 |
| chr11 | 120508174 | 120508562 |
| chr11 | 120508562 | 120508883 |
| chr11 | 120510043 | 120510194 |
| chr11 | 120515463 | 120515956 |
| chr11 | 120518181 | 120518429 |
| chr11 | 120518654 | 120518827 |
| chr11 | 120519748 | 120520079 |
| chr11 | 120528845 | 120528995 |
| chr11 | 120530340 | 120530633 |
| chr11 | 120530660 | 120530918 |
| chr11 | 120536705 | 120536973 |
| chr11 | 120539202 | 120539705 |
| chr11 | 120539708 | 120539859 |
| chr11 | 120540148 | 120540373 |
| chr11 | 120541907 | 120542117 |
| chr11 | 120542117 | 120542351 |
| chr11 | 120547588 | 120547786 |
| chr11 | 120549113 | 120549973 |
| chr11 | 120552827 | 120553051 |
| chr11 | 120554746 | 120555242 |
| chr11 | 120555265 | 120555614 |
| chr11 | 120561392 | 120561604 |
| chr11 | 120565187 | 120565468 |
| chr11 | 120571094 | 120571417 |
| chr11 | 120572475 | 120572713 |
| chr11 | 120572713 | 120572948 |
| chr11 | 120572948 | 120573157 |
| chr11 | 120573157 | 120573456 |
| chr11 | 120573456 | 120573734 |
| chr11 | 120579753 | 120580055 |
| chr11 | 120580055 | 120580227 |
| chr11 | 120580286 | 120580542 |
| chr11 | 120581107 | 120581401 |
| chr11 | 120581401 | 120581733 |
| chr11 | 120581733 | 120582001 |
| chr11 | 120582001 | 120582398 |

|       |           |           |
|-------|-----------|-----------|
| chr11 | 120588607 | 120588872 |
| chr11 | 120597633 | 120597866 |
| chr11 | 120597873 | 120598299 |
| chr11 | 120598299 | 120598810 |
| chr11 | 120605240 | 120605409 |
| chr11 | 120607183 | 120607390 |
| chr11 | 120608017 | 120608368 |
| chr11 | 120608436 | 120608596 |
| chr11 | 120612750 | 120613033 |
| chr11 | 120615629 | 120615974 |
| chr11 | 120617549 | 120617828 |
| chr11 | 120617828 | 120618209 |
| chr11 | 120624340 | 120624619 |
| chr11 | 120624619 | 120624879 |
| chr11 | 120624879 | 120625153 |
| chr11 | 120625200 | 120625356 |
| chr11 | 120630101 | 120630369 |
| chr11 | 120630375 | 120631133 |
| chr11 | 120632513 | 120632808 |
| chr11 | 120632808 | 120633221 |
| chr11 | 120633240 | 120633533 |
| chr11 | 120633533 | 120633865 |
| chr11 | 120641706 | 120641981 |
| chr11 | 120643086 | 120643413 |
| chr11 | 120643413 | 120643661 |
| chr11 | 120643661 | 120643992 |
| chr11 | 120651966 | 120652174 |
| chr11 | 120654023 | 120654387 |
| chr11 | 120658904 | 120659164 |
| chr11 | 120659164 | 120659375 |
| chr11 | 120659829 | 120660197 |
| chr11 | 120660197 | 120660478 |
| chr11 | 120660478 | 120660687 |
| chr11 | 120660687 | 120661199 |
| chr11 | 120672642 | 120673141 |
| chr11 | 120673141 | 120673534 |
| chr11 | 120673534 | 120673989 |
| chr11 | 120679856 | 120680093 |
| chr11 | 120682708 | 120683086 |
| chr11 | 120683588 | 120683912 |
| chr11 | 120685436 | 120685598 |
| chr11 | 120692299 | 120692731 |

|       |           |           |
|-------|-----------|-----------|
| chr11 | 120692731 | 120692925 |
| chr11 | 120697663 | 120698474 |
| chr11 | 120703737 | 120704491 |
| chr11 | 120706145 | 120706432 |
| chr11 | 120712760 | 120713205 |
| chr11 | 120713217 | 120713567 |
| chr11 | 120713567 | 120714082 |
| chr11 | 120714102 | 120714429 |
| chr11 | 120720481 | 120720769 |
| chr11 | 120721200 | 120721604 |
| chr11 | 120721604 | 120721832 |
| chr11 | 120721832 | 120722374 |
| chr11 | 120726872 | 120727191 |
| chr11 | 120727191 | 120727573 |
| chr11 | 120729532 | 120729769 |
| chr11 | 120733601 | 120733814 |
| chr11 | 120741862 | 120742058 |
| chr11 | 120742583 | 120742927 |
| chr11 | 120743935 | 120744286 |
| chr11 | 120744608 | 120744849 |
| chr11 | 120749571 | 120749738 |
| chr11 | 120753422 | 120753713 |
| chr11 | 120753713 | 120753965 |
| chr11 | 120762214 | 120762670 |
| chr11 | 120762907 | 120763057 |
| chr11 | 120763102 | 120763559 |
| chr11 | 120763559 | 120763967 |
| chr11 | 120768187 | 120768630 |
| chr11 | 120773498 | 120773784 |
| chr11 | 120775913 | 120776482 |
| chr11 | 120783544 | 120783775 |
| chr11 | 120783824 | 120784123 |
| chr11 | 120784123 | 120784860 |
| chr11 | 120784871 | 120785049 |
| chr11 | 120789908 | 120790060 |
| chr11 | 120790777 | 120790989 |
| chr11 | 120794994 | 120795153 |
| chr11 | 120795901 | 120796277 |
| chr11 | 120796277 | 120796586 |
| chr11 | 120796586 | 120796871 |
| chr11 | 120800061 | 120800353 |
| chr11 | 120800353 | 120800637 |



|       |           |           |
|-------|-----------|-----------|
| chr11 | 120800640 | 120800795 |
| chr11 | 120806557 | 120806974 |
| chr11 | 120813538 | 120813762 |
| chr11 | 120822288 | 120822588 |
| chr11 | 120823554 | 120824004 |
| chr11 | 120824004 | 120824275 |
| chr11 | 120824275 | 120824514 |
| chr11 | 120824514 | 120824983 |
| chr11 | 120834803 | 120834974 |
| chr11 | 120850704 | 120851091 |
| chr11 | 120851201 | 120851446 |
| chr11 | 120855833 | 120856179 |
| chr11 | 120880035 | 120880258 |
| chr11 | 120894493 | 120894646 |
| chr11 | 120895091 | 120895254 |
| chr11 | 120898073 | 120898363 |
| chr11 | 120898363 | 120898683 |
| chr11 | 120905427 | 120905693 |
| chr11 | 120905693 | 120905937 |
| chr11 | 120932493 | 120933249 |
| chr11 | 120936340 | 120936531 |
| chr11 | 120938805 | 120939339 |
| chr11 | 120939429 | 120939621 |
| chr11 | 120948823 | 120949223 |
| chr11 | 120950606 | 120950867 |
| chr11 | 120950867 | 120951205 |
| chr11 | 120954970 | 120955322 |
| chr11 | 120955577 | 120955829 |
| chr11 | 120957685 | 120957879 |
| chr11 | 120960408 | 120960558 |
| chr11 | 120965673 | 120965866 |
| chr11 | 120973379 | 120973542 |
| chr11 | 120984363 | 120984758 |
| chr11 | 120984758 | 120985259 |
| chr11 | 120990157 | 120990347 |
| chr11 | 120990347 | 120990565 |
| chr11 | 120990565 | 120990866 |
| chr11 | 120990866 | 120991187 |
| chr11 | 120991215 | 120991546 |
| chr11 | 120995737 | 120996037 |
| chr11 | 120996549 | 120997125 |
| chr11 | 121004275 | 121004810 |

|       |           |           |
|-------|-----------|-----------|
| chr11 | 121014736 | 121015362 |
| chr11 | 121017760 | 121018034 |
| chr11 | 121039262 | 121039573 |
| chr11 | 121041207 | 121041684 |
| chr11 | 121048099 | 121048283 |
| chr11 | 121053597 | 121054030 |
| chr11 | 121063489 | 121063714 |
| chr11 | 121063794 | 121064151 |
| chr11 | 121064209 | 121064574 |
| chr11 | 121084937 | 121085654 |
| chr11 | 121086319 | 121086629 |
| chr11 | 121089078 | 121089274 |
| chr11 | 121091000 | 121091376 |
| chr11 | 121112161 | 121112345 |
| chr11 | 121112411 | 121112807 |
| chr11 | 121118354 | 121118509 |
| chr11 | 121126464 | 121126709 |
| chr11 | 121129750 | 121130159 |
| chr11 | 121136233 | 121136469 |
| chr11 | 121143185 | 121143732 |
| chr11 | 121145875 | 121146158 |
| chr11 | 121156473 | 121157011 |
| chr11 | 121176252 | 121176865 |
| chr11 | 121181630 | 121182004 |
| chr11 | 121184558 | 121184806 |
| chr11 | 121184806 | 121185095 |
| chr11 | 121185095 | 121185410 |
| chr11 | 121204004 | 121204568 |
| chr11 | 121204568 | 121205044 |
| chr11 | 121220796 | 121220950 |
| chr11 | 121221577 | 121221988 |
| chr11 | 121228758 | 121228958 |
| chr11 | 121228958 | 121229219 |
| chr11 | 121229219 | 121229660 |
| chr11 | 121236569 | 121236923 |
| chr11 | 121236923 | 121237289 |
| chr11 | 121237289 | 121237588 |
| chr11 | 121237621 | 121237817 |
| chr11 | 121259246 | 121259463 |
| chr11 | 121259480 | 121260192 |
| chr11 | 121260243 | 121260488 |
| chr11 | 121260570 | 121260882 |

|       |           |           |
|-------|-----------|-----------|
| chr11 | 121266295 | 121266462 |
| chr11 | 121280003 | 121280158 |
| chr11 | 121280381 | 121280745 |
| chr11 | 121280826 | 121280976 |
| chr11 | 121281143 | 121281428 |
| chr11 | 121289966 | 121290122 |
| chr11 | 121294916 | 121295122 |
| chr11 | 121298558 | 121298845 |
| chr11 | 121320922 | 121321144 |
| chr11 | 121327779 | 121328130 |
| chr11 | 121328231 | 121328695 |
| chr11 | 121353740 | 121354207 |
| chr11 | 121354207 | 121354812 |
| chr11 | 121362327 | 121362542 |
| chr11 | 121372729 | 121373093 |
| chr11 | 121373341 | 121373658 |
| chr11 | 121373658 | 121373921 |
| chr11 | 121387806 | 121388160 |
| chr11 | 121388160 | 121388547 |
| chr11 | 121388547 | 121388823 |
| chr11 | 121390834 | 121391012 |
| chr11 | 121396301 | 121396560 |
| chr11 | 121402979 | 121403214 |
| chr11 | 121403214 | 121403463 |
| chr11 | 121407425 | 121407621 |
| chr11 | 121411843 | 121412157 |
| chr11 | 121415452 | 121415656 |
| chr11 | 121420837 | 121421206 |
| chr11 | 121421206 | 121421582 |
| chr11 | 121421582 | 121421910 |
| chr11 | 121434246 | 121434406 |
| chr11 | 121434720 | 121435279 |
| chr11 | 121441820 | 121441970 |
| chr11 | 121451522 | 121451929 |
| chr11 | 121451929 | 121452220 |
| chr11 | 121452220 | 121452565 |
| chr11 | 121475567 | 121475757 |
| chr11 | 121475757 | 121476034 |
| chr11 | 121496168 | 121496324 |
| chr11 | 121522391 | 121522602 |
| chr11 | 121536649 | 121536833 |
| chr11 | 121543327 | 121543806 |

|       |           |           |
|-------|-----------|-----------|
| chr11 | 121543806 | 121544303 |
| chr11 | 121544303 | 121544530 |
| chr11 | 121544788 | 121545086 |
| chr11 | 121550277 | 121550607 |
| chr11 | 121551208 | 121551574 |
| chr11 | 121552214 | 121552540 |
| chr11 | 121558064 | 121558262 |
| chr11 | 121558405 | 121558933 |
| chr11 | 121560314 | 121560603 |
| chr11 | 121576068 | 121576546 |
| chr11 | 121576546 | 121576879 |
| chr11 | 121597089 | 121597731 |
| chr11 | 121604108 | 121604523 |
| chr11 | 121607731 | 121607948 |
| chr11 | 121607948 | 121608275 |
| chr11 | 121609990 | 121610177 |
| chr11 | 121610410 | 121610588 |
| chr11 | 121621805 | 121622138 |
| chr11 | 121626898 | 121627235 |
| chr11 | 121629605 | 121629898 |
| chr11 | 121630414 | 121630747 |
| chr11 | 121631774 | 121632120 |
| chr11 | 121641586 | 121641736 |
| chr11 | 121646336 | 121646857 |
| chr11 | 121647165 | 121647390 |
| chr11 | 121647390 | 121647681 |
| chr11 | 121650856 | 121651036 |
| chr11 | 121651863 | 121652403 |
| chr11 | 121652679 | 121652928 |
| chr11 | 121654047 | 121654277 |
| chr11 | 121655237 | 121655441 |
| chr11 | 121672663 | 121672986 |
| chr11 | 121672986 | 121673549 |
| chr11 | 121679628 | 121680174 |
| chr11 | 121680737 | 121680949 |
| chr11 | 121685611 | 121686036 |
| chr11 | 121686178 | 121686412 |
| chr11 | 121689365 | 121689579 |
| chr11 | 121693817 | 121693967 |
| chr11 | 121697491 | 121698008 |
| chr11 | 121702131 | 121702483 |
| chr11 | 121702483 | 121702911 |

|       |           |           |
|-------|-----------|-----------|
| chr11 | 121703222 | 121703518 |
| chr11 | 121706510 | 121706955 |
| chr11 | 121710769 | 121711022 |
| chr11 | 121712329 | 121712579 |
| chr11 | 121712622 | 121713013 |
| chr11 | 121713013 | 121713349 |
| chr11 | 121717678 | 121718131 |
| chr11 | 121720795 | 121721207 |
| chr11 | 121722520 | 121722865 |
| chr11 | 121725280 | 121725533 |
| chr11 | 121740670 | 121740944 |
| chr11 | 121740944 | 121741329 |
| chr11 | 121741391 | 121741997 |
| chr11 | 121768881 | 121769161 |
| chr11 | 121781900 | 121782081 |
| chr11 | 121808212 | 121808560 |
| chr11 | 121808560 | 121808775 |
| chr11 | 121808777 | 121809093 |
| chr11 | 121810793 | 121810948 |
| chr11 | 121846023 | 121846210 |
| chr11 | 121847745 | 121847998 |
| chr11 | 121847998 | 121848385 |
| chr11 | 121925556 | 121925721 |
| chr11 | 121934931 | 121935253 |
| chr11 | 121951765 | 121952146 |
| chr11 | 121956589 | 121956915 |
| chr11 | 121956946 | 121957138 |
| chr11 | 121966031 | 121966184 |
| chr11 | 121981734 | 121982010 |
| chr11 | 121982294 | 121982610 |
| chr12 | 3082173   | 3082391   |
| chr12 | 3082400   | 3082556   |
| chr12 | 3082556   | 3082728   |
| chr12 | 3098259   | 3098519   |
| chr12 | 3109802   | 3110169   |
| chr12 | 3110568   | 3110797   |
| chr12 | 3110797   | 3111009   |
| chr12 | 3119951   | 3120189   |
| chr12 | 3142820   | 3143072   |
| chr12 | 3143917   | 3144107   |
| chr12 | 3172241   | 3172426   |
| chr12 | 3179850   | 3180056   |

|       |         |         |
|-------|---------|---------|
| chr12 | 3180843 | 3181284 |
| chr12 | 3188820 | 3189184 |
| chr12 | 3199098 | 3199318 |
| chr12 | 3209225 | 3209403 |
| chr12 | 3210247 | 3210533 |
| chr12 | 3229405 | 3229555 |
| chr12 | 3234964 | 3235209 |
| chr12 | 3235209 | 3235556 |
| chr12 | 3235556 | 3235870 |
| chr12 | 3235870 | 3236129 |
| chr12 | 3245897 | 3246144 |
| chr12 | 3246184 | 3246410 |
| chr12 | 3253668 | 3253898 |
| chr12 | 3256288 | 3256536 |
| chr12 | 3283066 | 3283295 |
| chr12 | 3283918 | 3284133 |
| chr12 | 3284364 | 3284746 |
| chr12 | 3292276 | 3292430 |
| chr12 | 3299450 | 3299802 |
| chr12 | 3309349 | 3309711 |
| chr12 | 3309711 | 3310048 |
| chr12 | 3310048 | 3310643 |
| chr12 | 3317083 | 3317296 |
| chr12 | 3317296 | 3317521 |
| chr12 | 3319456 | 3319774 |
| chr12 | 3323200 | 3323561 |
| chr12 | 3323561 | 3323822 |
| chr12 | 3349403 | 3349750 |
| chr12 | 3349750 | 3349994 |
| chr12 | 3350061 | 3350393 |
| chr12 | 3352212 | 3352741 |
| chr12 | 3357419 | 3357590 |
| chr12 | 3359257 | 3359502 |
| chr12 | 3359502 | 3359732 |
| chr12 | 3364826 | 3365591 |
| chr12 | 3365591 | 3366300 |
| chr12 | 3371109 | 3371606 |
| chr12 | 3371606 | 3371950 |
| chr12 | 3377216 | 3377521 |
| chr12 | 3389281 | 3389776 |
| chr12 | 3390958 | 3391211 |
| chr12 | 3396088 | 3396218 |

|       |         |         |
|-------|---------|---------|
| chr12 | 3396218 | 3396348 |
| chr12 | 3396517 | 3396711 |
| chr12 | 3405764 | 3406084 |
| chr12 | 3413955 | 3414487 |
| chr12 | 3419400 | 3419709 |
| chr12 | 3422650 | 3422893 |
| chr12 | 3422893 | 3423190 |
| chr12 | 3426033 | 3426266 |
| chr12 | 3426489 | 3426931 |
| chr12 | 3426931 | 3427333 |
| chr12 | 3427333 | 3427675 |
| chr12 | 3427675 | 3427912 |
| chr12 | 3436434 | 3436632 |
| chr12 | 3436632 | 3436840 |
| chr12 | 3437236 | 3437795 |
| chr12 | 3512206 | 3512554 |
| chr12 | 3537673 | 3537827 |
| chr12 | 3547484 | 3547685 |
| chr12 | 3548273 | 3548461 |
| chr12 | 3548498 | 3548720 |
| chr12 | 3548720 | 3548985 |
| chr12 | 3549396 | 3549662 |
| chr12 | 3556181 | 3556356 |
| chr12 | 3557917 | 3558258 |
| chr12 | 3558858 | 3559043 |
| chr12 | 3559700 | 3559888 |
| chr12 | 3560662 | 3560965 |
| chr12 | 3570607 | 3570830 |
| chr12 | 3570905 | 3571081 |
| chr12 | 3571842 | 3572522 |
| chr12 | 3572522 | 3573092 |
| chr12 | 3582397 | 3582547 |
| chr12 | 3582593 | 3583231 |
| chr12 | 3583655 | 3583805 |
| chr12 | 3589001 | 3589263 |
| chr12 | 3596936 | 3597130 |
| chr12 | 3602871 | 3603113 |
| chr12 | 3642045 | 3642265 |
| chr12 | 3659572 | 3659775 |
| chr12 | 3662626 | 3663125 |
| chr12 | 3691149 | 3691377 |
| chr12 | 3695819 | 3696057 |

|       |         |         |
|-------|---------|---------|
| chr12 | 3700649 | 3700829 |
| chr12 | 3702647 | 3702797 |
| chr12 | 3704770 | 3705066 |
| chr12 | 3711174 | 3711956 |
| chr12 | 3718262 | 3718559 |
| chr12 | 3718559 | 3718763 |
| chr12 | 3719035 | 3719891 |
| chr12 | 3729622 | 3730061 |
| chr12 | 3746076 | 3746368 |
| chr12 | 3746368 | 3746738 |
| chr12 | 3747619 | 3748022 |
| chr12 | 3764067 | 3764490 |
| chr12 | 3764490 | 3764900 |
| chr12 | 3775859 | 3776034 |
| chr12 | 3780404 | 3780631 |
| chr12 | 3781034 | 3781355 |
| chr12 | 3781551 | 3781860 |
| chr12 | 3787817 | 3788132 |
| chr12 | 3791771 | 3792188 |
| chr12 | 3795588 | 3795902 |
| chr12 | 3806247 | 3806578 |
| chr12 | 3806578 | 3806882 |
| chr12 | 3806882 | 3807265 |
| chr12 | 3807311 | 3807575 |
| chr12 | 3807575 | 3807815 |
| chr12 | 3807815 | 3807992 |
| chr12 | 3808780 | 3808973 |
| chr12 | 3817132 | 3817310 |
| chr12 | 3823458 | 3823807 |
| chr12 | 3824868 | 3825160 |
| chr12 | 3825191 | 3825440 |
| chr12 | 3825793 | 3826039 |
| chr12 | 3828758 | 3828945 |
| chr12 | 3839459 | 3839693 |
| chr12 | 3841103 | 3841284 |
| chr12 | 3842903 | 3843058 |
| chr12 | 3846240 | 3846604 |
| chr12 | 3854296 | 3854822 |
| chr12 | 3856181 | 3856408 |
| chr12 | 3860768 | 3861021 |
| chr12 | 3861658 | 3862020 |
| chr12 | 3862329 | 3862517 |



|       |         |         |
|-------|---------|---------|
| chr12 | 3866629 | 3867047 |
| chr12 | 3868649 | 3868870 |
| chr12 | 3894681 | 3894863 |
| chr12 | 3910811 | 3910991 |
| chr12 | 3926201 | 3926434 |
| chr12 | 3928940 | 3929180 |
| chr12 | 3942194 | 3942584 |
| chr12 | 3959791 | 3960155 |
| chr12 | 3960155 | 3960417 |
| chr12 | 3972796 | 3973283 |
| chr12 | 3973283 | 3973637 |
| chr12 | 3981188 | 3981786 |
| chr12 | 3981786 | 3982120 |
| chr12 | 3983819 | 3983971 |
| chr12 | 4007245 | 4007499 |
| chr12 | 4038103 | 4038376 |
| chr12 | 4038407 | 4038719 |
| chr12 | 4038719 | 4039403 |
| chr12 | 4054473 | 4054641 |
| chr12 | 4054900 | 4055131 |
| chr12 | 4065579 | 4065746 |
| chr12 | 4066725 | 4067018 |
| chr12 | 4082259 | 4082500 |
| chr12 | 4082500 | 4082774 |
| chr12 | 4082774 | 4083079 |
| chr12 | 4107427 | 4107846 |
| chr12 | 4118320 | 4118529 |
| chr12 | 4123001 | 4123248 |
| chr12 | 4132939 | 4133247 |
| chr12 | 4133247 | 4133798 |
| chr12 | 4133953 | 4134137 |
| chr12 | 4158199 | 4158395 |
| chr12 | 4171015 | 4171580 |
| chr12 | 4173337 | 4173902 |
| chr12 | 4179865 | 4180066 |
| chr12 | 4180550 | 4180792 |
| chr12 | 4183943 | 4184103 |
| chr12 | 4188126 | 4188697 |
| chr12 | 4198633 | 4199161 |
| chr12 | 4208710 | 4209119 |
| chr12 | 4219308 | 4219567 |
| chr12 | 4219567 | 4219934 |

|       |         |         |
|-------|---------|---------|
| chr12 | 4219934 | 4220517 |
| chr12 | 4220517 | 4221040 |
| chr12 | 4221040 | 4221378 |
| chr12 | 4221378 | 4221711 |
| chr12 | 4233633 | 4233898 |
| chr12 | 4233898 | 4234185 |
| chr12 | 4234185 | 4234670 |
| chr12 | 4239366 | 4239547 |
| chr12 | 4240078 | 4240300 |
| chr12 | 4255684 | 4255908 |
| chr12 | 4285379 | 4285579 |
| chr12 | 4355436 | 4355622 |
| chr12 | 4369240 | 4369533 |
| chr12 | 4393507 | 4393734 |
| chr12 | 4394465 | 4394637 |
| chr12 | 4424455 | 4424754 |
| chr12 | 4424754 | 4425132 |
| chr12 | 4430763 | 4431094 |
| chr12 | 4431094 | 4431393 |
| chr12 | 4441525 | 4441862 |
| chr12 | 4461068 | 4461276 |
| chr12 | 4476195 | 4476611 |
| chr12 | 4476611 | 4477041 |
| chr12 | 4477041 | 4477609 |
| chr12 | 4488632 | 4488782 |
| chr12 | 4497374 | 4497835 |
| chr12 | 4505305 | 4505578 |
| chr12 | 4507532 | 4507704 |
| chr12 | 4534392 | 4534542 |
| chr12 | 4548701 | 4548984 |
| chr12 | 4557577 | 4557761 |
| chr12 | 4558577 | 4559218 |
| chr12 | 4569176 | 4569389 |
| chr12 | 4571960 | 4572221 |
| chr12 | 4574101 | 4574531 |
| chr12 | 4588593 | 4589011 |
| chr12 | 4590574 | 4591006 |
| chr12 | 4592712 | 4593245 |
| chr12 | 4593245 | 4593565 |
| chr12 | 4593616 | 4593849 |
| chr12 | 4599155 | 4599441 |
| chr12 | 4599744 | 4600021 |

|       |         |         |
|-------|---------|---------|
| chr12 | 4600021 | 4600258 |
| chr12 | 4636811 | 4637151 |
| chr12 | 4694652 | 4694815 |
| chr12 | 4694913 | 4695390 |
| chr12 | 4697338 | 4697491 |
| chr12 | 4709206 | 4709422 |
| chr12 | 4709488 | 4709638 |
| chr12 | 4716861 | 4717028 |
| chr12 | 4720439 | 4720685 |
| chr12 | 4734065 | 4734223 |
| chr12 | 4734223 | 4734383 |
| chr12 | 4734439 | 4734596 |
| chr12 | 4744589 | 4744758 |
| chr12 | 4768818 | 4769144 |
| chr12 | 4769144 | 4769577 |
| chr12 | 4778464 | 4778756 |
| chr12 | 4781383 | 4781552 |
| chr12 | 4782172 | 4782448 |
| chr12 | 4783213 | 4783397 |
| chr12 | 4792790 | 4793081 |
| chr12 | 4793470 | 4793781 |
| chr12 | 4793781 | 4794217 |
| chr12 | 4816963 | 4817343 |
| chr12 | 4817343 | 4817629 |
| chr12 | 4817629 | 4817882 |
| chr12 | 4817882 | 4818096 |
| chr12 | 4827354 | 4827595 |
| chr12 | 4841326 | 4841855 |
| chr12 | 4843162 | 4843628 |
| chr12 | 4843833 | 4844086 |
| chr12 | 4844382 | 4844612 |
| chr12 | 4856306 | 4856466 |
| chr12 | 4856915 | 4857106 |
| chr12 | 4857325 | 4857475 |
| chr12 | 4862765 | 4862993 |
| chr12 | 4863687 | 4864034 |
| chr12 | 4864074 | 4864444 |
| chr12 | 4868983 | 4869204 |
| chr12 | 4874082 | 4874705 |
| chr12 | 4878412 | 4878665 |
| chr12 | 4879176 | 4879326 |
| chr12 | 4906962 | 4907424 |

|       |         |         |
|-------|---------|---------|
| chr12 | 4907424 | 4907667 |
| chr12 | 4907667 | 4907921 |
| chr12 | 4911856 | 4912122 |
| chr12 | 4913199 | 4913369 |
| chr12 | 4916942 | 4917456 |
| chr12 | 4917456 | 4917756 |
| chr12 | 4917756 | 4918127 |
| chr12 | 4918185 | 4918357 |
| chr12 | 4918360 | 4918548 |
| chr12 | 4930955 | 4931142 |
| chr12 | 4931344 | 4931656 |
| chr12 | 4973035 | 4973241 |
| chr12 | 5055079 | 5055282 |
| chr12 | 5055282 | 5055490 |
| chr12 | 5055543 | 5055693 |
| chr12 | 5055938 | 5056338 |
| chr12 | 5058405 | 5058585 |
| chr12 | 5058585 | 5058701 |
| chr12 | 5058701 | 5058864 |
| chr12 | 5059166 | 5059496 |
| chr12 | 5063587 | 5063775 |
| chr12 | 5066829 | 5066979 |
| chr12 | 5067242 | 5067688 |
| chr12 | 5108657 | 5109062 |
| chr12 | 5119760 | 5120052 |
| chr12 | 5123346 | 5123577 |
| chr12 | 5123577 | 5123829 |
| chr12 | 5136335 | 5136662 |
| chr12 | 5147746 | 5147898 |
| chr12 | 5176813 | 5177053 |
| chr12 | 5177053 | 5177334 |
| chr12 | 5182214 | 5182417 |
| chr12 | 5213626 | 5213851 |
| chr12 | 5213851 | 5214290 |
| chr12 | 5276939 | 5277646 |
| chr12 | 5282501 | 5282967 |
| chr12 | 5282967 | 5283259 |
| chr12 | 5325416 | 5325566 |
| chr12 | 5374149 | 5374326 |
| chr12 | 5374839 | 5375063 |
| chr12 | 5375063 | 5375286 |
| chr12 | 5375286 | 5375561 |

|       |         |         |
|-------|---------|---------|
| chr12 | 5375561 | 5376107 |
| chr12 | 5376109 | 5376316 |
| chr12 | 5410459 | 5410681 |
| chr12 | 5417533 | 5417717 |
| chr12 | 5506056 | 5506451 |
| chr12 | 5506451 | 5506675 |
| chr12 | 5506675 | 5506922 |
| chr12 | 6110823 | 6111085 |
| chr12 | 6219780 | 6219942 |
| chr12 | 6353237 | 6353505 |
| chr12 | 6411791 | 6412069 |
| chr12 | 6760247 | 6760537 |
| chr12 | 6780679 | 6780872 |
| chr12 | 6782480 | 6782817 |
| chr12 | 6786139 | 6786528 |
| chr12 | 6790365 | 6790675 |
| chr12 | 6842753 | 6843121 |
| chr12 | 6843257 | 6843602 |
| chr12 | 6857835 | 6858088 |
| chr12 | 7023093 | 7023350 |
| chr12 | 7074245 | 7074540 |
| chr12 | 7085216 | 7085505 |
| chr12 | 7086993 | 7087195 |
| chr12 | 7093506 | 7093687 |
| chr12 | 7758226 | 7758438 |
| chr12 | 7777743 | 7777986 |
| chr12 | 7816615 | 7816967 |
| chr12 | 7820370 | 7820520 |
| chr12 | 7830930 | 7831175 |
| chr12 | 7857216 | 7857544 |
| chr12 | 7905410 | 7905634 |
| chr12 | 7914016 | 7914210 |
| chr12 | 7918464 | 7918946 |
| chr12 | 7918946 | 7919432 |
| chr12 | 7919432 | 7919766 |
| chr12 | 7922322 | 7922525 |
| chr12 | 7954767 | 7954994 |
| chr12 | 7967139 | 7967361 |
| chr12 | 7967361 | 7967996 |
| chr12 | 7968110 | 7968708 |
| chr12 | 7976028 | 7976227 |
| chr12 | 7978211 | 7978473 |

|       |         |         |
|-------|---------|---------|
| chr12 | 7978473 | 7978792 |
| chr12 | 7990881 | 7991115 |
| chr12 | 8042716 | 8042894 |
| chr12 | 8054752 | 8055032 |
| chr12 | 8059660 | 8059902 |
| chr12 | 8070427 | 8070751 |
| chr12 | 8070751 | 8071386 |
| chr12 | 8071388 | 8071637 |
| chr12 | 8076047 | 8076470 |
| chr12 | 8076508 | 8076675 |
| chr12 | 8089980 | 8090191 |
| chr12 | 8090191 | 8090397 |
| chr12 | 8099184 | 8099449 |
| chr12 | 8099921 | 8100128 |
| chr12 | 8181606 | 8182182 |
| chr12 | 8182981 | 8183141 |
| chr12 | 8207956 | 8208500 |
| chr12 | 8222984 | 8223663 |
| chr12 | 8224379 | 8224529 |
| chr12 | 8232788 | 8233031 |
| chr12 | 8243096 | 8243660 |
| chr12 | 8243736 | 8243949 |
| chr12 | 8295481 | 8295824 |
| chr12 | 8297946 | 8298192 |
| chr12 | 8298192 | 8298421 |
| chr12 | 8298454 | 8298840 |
| chr12 | 8301826 | 8302008 |
| chr12 | 8306441 | 8306629 |
| chr12 | 8306629 | 8306857 |
| chr12 | 8306974 | 8307276 |
| chr12 | 8313192 | 8313537 |
| chr12 | 8313537 | 8314099 |
| chr12 | 8319920 | 8320139 |
| chr12 | 8320139 | 8320403 |
| chr12 | 8326693 | 8326896 |
| chr12 | 8326896 | 8327317 |
| chr12 | 8328323 | 8328534 |
| chr12 | 8331985 | 8332194 |
| chr12 | 8333537 | 8333994 |
| chr12 | 8337739 | 8337923 |
| chr12 | 8338338 | 8338574 |
| chr12 | 8338574 | 8338875 |

|       |         |         |
|-------|---------|---------|
| chr12 | 8338875 | 8339155 |
| chr12 | 8339235 | 8339439 |
| chr12 | 8348810 | 8349095 |
| chr12 | 8349893 | 8350046 |
| chr12 | 8351060 | 8351704 |
| chr12 | 8357356 | 8357819 |
| chr12 | 8358559 | 8358875 |
| chr12 | 8364464 | 8364980 |
| chr12 | 8365946 | 8366242 |
| chr12 | 8371799 | 8372247 |
| chr12 | 8372247 | 8372496 |
| chr12 | 8372776 | 8373127 |
| chr12 | 8373511 | 8373688 |
| chr12 | 8378941 | 8379084 |
| chr12 | 8379084 | 8379229 |
| chr12 | 8379731 | 8380351 |
| chr12 | 8386346 | 8386973 |
| chr12 | 8386973 | 8387455 |
| chr12 | 8387455 | 8387785 |
| chr12 | 8399008 | 8399158 |
| chr12 | 8402121 | 8402333 |
| chr12 | 8404397 | 8404609 |
| chr12 | 8418821 | 8419550 |
| chr12 | 8430928 | 8431274 |
| chr12 | 8431777 | 8432087 |
| chr12 | 8433477 | 8433778 |
| chr12 | 8439975 | 8440228 |
| chr12 | 8450049 | 8450296 |
| chr12 | 8450553 | 8451043 |
| chr12 | 8452931 | 8453110 |
| chr12 | 8457041 | 8457424 |
| chr12 | 8457454 | 8457654 |
| chr12 | 8462637 | 8462837 |
| chr12 | 8462985 | 8463229 |
| chr12 | 8475952 | 8476102 |
| chr12 | 8487061 | 8487319 |
| chr12 | 8487319 | 8487648 |
| chr12 | 8487983 | 8488234 |
| chr12 | 8488340 | 8488638 |
| chr12 | 8488638 | 8488874 |
| chr12 | 8499065 | 8499773 |
| chr12 | 8499773 | 8500461 |

|       |         |         |
|-------|---------|---------|
| chr12 | 8509696 | 8510047 |
| chr12 | 8510992 | 8511427 |
| chr12 | 8511427 | 8511757 |
| chr12 | 8519416 | 8519805 |
| chr12 | 8521352 | 8522008 |
| chr12 | 8522095 | 8522260 |
| chr12 | 8525001 | 8525290 |
| chr12 | 8527839 | 8528096 |
| chr12 | 8545288 | 8545538 |
| chr12 | 8547318 | 8547859 |
| chr12 | 8552155 | 8552332 |
| chr12 | 8555320 | 8555844 |
| chr12 | 8556325 | 8556626 |
| chr12 | 8571274 | 8571534 |
| chr12 | 8571595 | 8571818 |
| chr12 | 8571897 | 8572322 |
| chr12 | 8582998 | 8583297 |
| chr12 | 8585224 | 8585386 |
| chr12 | 8585987 | 8586536 |
| chr12 | 8587736 | 8588032 |
| chr12 | 8597411 | 8597580 |
| chr12 | 8607226 | 8607472 |
| chr12 | 8607807 | 8608063 |
| chr12 | 8608075 | 8608226 |
| chr12 | 8608474 | 8608624 |
| chr12 | 8608657 | 8608842 |
| chr12 | 8616426 | 8616669 |
| chr12 | 8638771 | 8639057 |
| chr12 | 8640685 | 8640952 |
| chr12 | 8640952 | 8641395 |
| chr12 | 8645453 | 8645627 |
| chr12 | 8661376 | 8661760 |
| chr12 | 8661782 | 8662099 |
| chr12 | 8662205 | 8662722 |
| chr12 | 8667858 | 8668144 |
| chr12 | 8673769 | 8674392 |
| chr12 | 8674392 | 8674864 |
| chr12 | 8675376 | 8675581 |
| chr12 | 8690277 | 8690682 |
| chr12 | 8698967 | 8699212 |
| chr12 | 8716159 | 8716407 |
| chr12 | 8726982 | 8727172 |



|       |         |         |
|-------|---------|---------|
| chr12 | 8730820 | 8730985 |
| chr12 | 8746677 | 8746958 |
| chr12 | 8753329 | 8753530 |
| chr12 | 8754146 | 8754555 |
| chr12 | 8754555 | 8754935 |
| chr12 | 8754935 | 8755249 |
| chr12 | 8760722 | 8760905 |
| chr12 | 8760905 | 8761172 |
| chr12 | 8761172 | 8761798 |
| chr12 | 8762785 | 8762948 |
| chr12 | 8770897 | 8771228 |
| chr12 | 8771228 | 8771546 |
| chr12 | 8771546 | 8771908 |
| chr12 | 8772508 | 8772668 |
| chr12 | 8772738 | 8773201 |
| chr12 | 8777597 | 8777858 |
| chr12 | 8778041 | 8778640 |
| chr12 | 8782079 | 8782337 |
| chr12 | 8784011 | 8784240 |
| chr12 | 8784240 | 8784691 |
| chr12 | 8785234 | 8785394 |
| chr12 | 8786377 | 8786698 |
| chr12 | 8787018 | 8787338 |
| chr12 | 8787338 | 8787571 |
| chr12 | 8795246 | 8795435 |
| chr12 | 8797070 | 8797373 |
| chr12 | 8797914 | 8798197 |
| chr12 | 8798197 | 8798452 |
| chr12 | 8798912 | 8799312 |
| chr12 | 8800034 | 8800193 |
| chr12 | 8805370 | 8805685 |
| chr12 | 8805982 | 8806265 |
| chr12 | 8807229 | 8807447 |
| chr12 | 8809023 | 8809614 |
| chr12 | 8811018 | 8811357 |
| chr12 | 8811357 | 8811645 |
| chr12 | 8811645 | 8811957 |
| chr12 | 8821743 | 8822228 |
| chr12 | 8825381 | 8825641 |
| chr12 | 8826814 | 8827352 |
| chr12 | 8827352 | 8827717 |
| chr12 | 8829641 | 8829818 |

|       |         |         |
|-------|---------|---------|
| chr12 | 8829818 | 8830047 |
| chr12 | 8842131 | 8842296 |
| chr12 | 8848149 | 8848470 |
| chr12 | 8848635 | 8848876 |
| chr12 | 8850221 | 8850446 |
| chr12 | 8853946 | 8854214 |
| chr12 | 8854227 | 8854924 |
| chr12 | 8860191 | 8860364 |
| chr12 | 8860688 | 8861037 |
| chr12 | 8864731 | 8865255 |
| chr12 | 8865255 | 8865606 |
| chr12 | 8866828 | 8867016 |
| chr12 | 8875528 | 8876074 |
| chr12 | 8876317 | 8876855 |
| chr12 | 8876855 | 8877215 |
| chr12 | 8877549 | 8877746 |
| chr12 | 8881812 | 8882057 |
| chr12 | 8882603 | 8882898 |
| chr12 | 8883149 | 8883414 |
| chr12 | 8885981 | 8886203 |
| chr12 | 8889201 | 8889614 |
| chr12 | 8889621 | 8889793 |
| chr12 | 8900956 | 8901163 |
| chr12 | 8908344 | 8908497 |
| chr12 | 8921061 | 8921282 |
| chr12 | 8921448 | 8921771 |
| chr12 | 8921771 | 8922119 |
| chr12 | 8922119 | 8922445 |
| chr12 | 8927977 | 8928192 |
| chr12 | 8928731 | 8929005 |
| chr12 | 8931549 | 8931802 |
| chr12 | 8935154 | 8935723 |
| chr12 | 8935952 | 8936181 |
| chr12 | 8947622 | 8947984 |
| chr12 | 8947984 | 8948456 |
| chr12 | 8955906 | 8956092 |
| chr12 | 8963909 | 8964135 |
| chr12 | 8964243 | 8964463 |
| chr12 | 8964463 | 8964694 |
| chr12 | 8964694 | 8964993 |
| chr12 | 8969814 | 8970215 |
| chr12 | 8973739 | 8974126 |

|       |         |         |
|-------|---------|---------|
| chr12 | 8974126 | 8974333 |
| chr12 | 8978744 | 8979038 |
| chr12 | 8980875 | 8981190 |
| chr12 | 9000244 | 9000563 |
| chr12 | 9002093 | 9002343 |
| chr12 | 9004813 | 9005081 |
| chr12 | 9013417 | 9013653 |
| chr12 | 9021410 | 9021678 |
| chr12 | 9021678 | 9022062 |
| chr12 | 9029646 | 9029796 |
| chr12 | 9029866 | 9030294 |
| chr12 | 9030294 | 9030593 |
| chr12 | 9032039 | 9032238 |
| chr12 | 9032925 | 9033203 |
| chr12 | 9033235 | 9033440 |
| chr12 | 9050942 | 9051181 |
| chr12 | 9051265 | 9051633 |
| chr12 | 9051633 | 9051903 |
| chr12 | 9052097 | 9052446 |
| chr12 | 9066056 | 9066325 |
| chr12 | 9066424 | 9066917 |
| chr12 | 9090253 | 9090620 |
| chr12 | 9094708 | 9094868 |
| chr12 | 9095105 | 9095496 |
| chr12 | 9112023 | 9112187 |
| chr12 | 9112190 | 9112604 |
| chr12 | 9112604 | 9112850 |
| chr12 | 9113676 | 9113989 |
| chr12 | 9166244 | 9166516 |
| chr12 | 9166516 | 9166744 |
| chr12 | 9170319 | 9170539 |
| chr12 | 9172539 | 9172730 |
| chr12 | 9174353 | 9174654 |
| chr12 | 9176231 | 9176586 |
| chr12 | 9232474 | 9232768 |
| chr12 | 9251843 | 9252103 |
| chr12 | 9274336 | 9274488 |
| chr12 | 9296721 | 9297013 |
| chr12 | 9297453 | 9297691 |
| chr12 | 9298854 | 9299476 |
| chr12 | 9304213 | 9304498 |
| chr12 | 9368776 | 9369084 |

|       |         |         |
|-------|---------|---------|
| chr12 | 9425135 | 9425462 |
| chr12 | 9425462 | 9425727 |
| chr12 | 9425727 | 9426012 |
| chr12 | 9426012 | 9426243 |
| chr12 | 9426243 | 9426493 |
| chr12 | 9426493 | 9426758 |
| chr12 | 9426758 | 9426950 |
| chr12 | 9426950 | 9427130 |
| chr12 | 9427130 | 9427344 |
| chr12 | 9444163 | 9444347 |
| chr12 | 9444890 | 9445186 |
| chr12 | 9569974 | 9570375 |
| chr12 | 9574293 | 9574613 |
| chr12 | 9574613 | 9574831 |
| chr12 | 9584569 | 9585145 |
| chr12 | 9585169 | 9585419 |
| chr12 | 9589556 | 9589749 |
| chr12 | 9589749 | 9590004 |
| chr12 | 9598296 | 9598594 |
| chr12 | 9650245 | 9650475 |
| chr12 | 9688077 | 9688682 |
| chr12 | 9689565 | 9690063 |
| chr12 | 9733075 | 9733233 |
| chr12 | 9762900 | 9763188 |
| chr12 | 9770334 | 9770772 |
| chr12 | 9833428 | 9833618 |
| chr12 | 9839196 | 9839480 |
| chr12 | 9839480 | 9839868 |
| chr12 | 9839868 | 9840539 |
| chr12 | 9847499 | 9847814 |
| chr12 | 9855746 | 9856195 |
| chr12 | 9856195 | 9856557 |
| chr12 | 9874483 | 9874850 |
| chr12 | 9874850 | 9875165 |
| chr12 | 9875165 | 9875535 |
| chr12 | 9898365 | 9898906 |
| chr12 | 9900818 | 9901095 |
| chr12 | 9901396 | 9901608 |
| chr12 | 9912412 | 9912670 |
| chr12 | 9944632 | 9944807 |
| chr12 | 9945888 | 9946082 |
| chr12 | 9946171 | 9946389 |

|       |          |          |
|-------|----------|----------|
| chr12 | 9946389  | 9946596  |
| chr12 | 9978455  | 9979031  |
| chr12 | 9979031  | 9979593  |
| chr12 | 9979632  | 9979790  |
| chr12 | 10004863 | 10005096 |
| chr12 | 10016827 | 10017046 |
| chr12 | 10017046 | 10017266 |
| chr12 | 10105757 | 10105944 |
| chr12 | 10135866 | 10136078 |
| chr12 | 10136078 | 10136283 |
| chr12 | 10197344 | 10197540 |
| chr12 | 10221914 | 10222080 |
| chr12 | 10223921 | 10224170 |
| chr12 | 10327883 | 10328033 |
| chr12 | 10329437 | 10329872 |
| chr12 | 10390589 | 10390921 |
| chr12 | 10390921 | 10391167 |
| chr12 | 10391167 | 10391481 |
| chr12 | 10404694 | 10404856 |
| chr12 | 10405223 | 10405561 |
| chr12 | 10410761 | 10411171 |
| chr12 | 10411465 | 10411800 |
| chr12 | 10411864 | 10412016 |
| chr12 | 10422399 | 10422684 |
| chr12 | 10438075 | 10438300 |
| chr12 | 10537171 | 10537418 |
| chr12 | 10583278 | 10583450 |
| chr12 | 10589470 | 10589970 |
| chr12 | 10593532 | 10593714 |
| chr12 | 10594667 | 10594902 |
| chr12 | 10598431 | 10598594 |
| chr12 | 10625245 | 10625445 |
| chr12 | 10865854 | 10866087 |
| chr12 | 10866087 | 10866488 |
| chr12 | 10867647 | 10867976 |
| chr12 | 10868196 | 10868694 |
| chr12 | 10881686 | 10881909 |
| chr12 | 10899264 | 10899458 |
| chr12 | 10961495 | 10961776 |
| chr12 | 10962503 | 10962728 |
| chr12 | 10962728 | 10962932 |
| chr12 | 11005997 | 11006309 |

|       |          |          |
|-------|----------|----------|
| chr12 | 11007884 | 11008089 |
| chr12 | 11120857 | 11121024 |
| chr12 | 11149908 | 11150058 |
| chr12 | 11150203 | 11150522 |
| chr12 | 11178618 | 11178800 |
| chr12 | 11178805 | 11179106 |
| chr12 | 11194240 | 11194460 |
| chr12 | 11194460 | 11194710 |
| chr12 | 11196310 | 11196554 |
| chr12 | 11213120 | 11213397 |
| chr12 | 11223158 | 11223374 |
| chr12 | 11265412 | 11265759 |
| chr12 | 11265759 | 11266232 |
| chr12 | 11266232 | 11266644 |
| chr12 | 11273216 | 11273490 |
| chr12 | 11317641 | 11318091 |
| chr12 | 11327842 | 11328042 |
| chr12 | 11332421 | 11332649 |
| chr12 | 11337007 | 11337193 |
| chr12 | 11341973 | 11342564 |
| chr12 | 11350889 | 11351189 |
| chr12 | 11370093 | 11370453 |
| chr12 | 11389059 | 11389693 |
| chr12 | 11390614 | 11390830 |
| chr12 | 11391530 | 11391867 |
| chr12 | 11436530 | 11436780 |
| chr12 | 11436780 | 11436972 |
| chr12 | 11436972 | 11437151 |
| chr12 | 11437640 | 11437896 |
| chr12 | 11455747 | 11456190 |
| chr12 | 11456190 | 11456604 |
| chr12 | 11551225 | 11551393 |
| chr12 | 11554007 | 11554319 |
| chr12 | 11577102 | 11577320 |
| chr12 | 11673362 | 11673540 |
| chr12 | 11717508 | 11717966 |
| chr12 | 11729163 | 11729377 |
| chr12 | 11796795 | 11796984 |
| chr12 | 12176309 | 12176473 |
| chr12 | 12261132 | 12261609 |
| chr12 | 12261671 | 12261987 |
| chr12 | 12261987 | 12262492 |

|       |          |          |
|-------|----------|----------|
| chr12 | 12262646 | 12262863 |
| chr12 | 12323586 | 12323861 |
| chr12 | 12323861 | 12324157 |
| chr12 | 12351172 | 12351484 |
| chr12 | 12390328 | 12390562 |
| chr12 | 12401083 | 12401312 |
| chr12 | 12412750 | 12413008 |
| chr12 | 12419598 | 12419927 |
| chr12 | 12420344 | 12420739 |
| chr12 | 12420858 | 12421337 |
| chr12 | 12427411 | 12427636 |
| chr12 | 12437428 | 12437857 |
| chr12 | 12492210 | 12492531 |
| chr12 | 12492627 | 12492779 |
| chr12 | 12493231 | 12493492 |
| chr12 | 12493492 | 12493736 |
| chr12 | 12496847 | 12497151 |
| chr12 | 12498115 | 12498271 |
| chr12 | 12505676 | 12505936 |
| chr12 | 12509153 | 12509573 |
| chr12 | 12509573 | 12509808 |
| chr12 | 12510165 | 12510399 |
| chr12 | 12511053 | 12511271 |
| chr12 | 12517126 | 12517276 |
| chr12 | 12527353 | 12527770 |
| chr12 | 12530757 | 12531224 |
| chr12 | 12531233 | 12531441 |
| chr12 | 12542364 | 12542721 |
| chr12 | 12542897 | 12543234 |
| chr12 | 12545383 | 12545895 |
| chr12 | 12549372 | 12549866 |
| chr12 | 12551901 | 12552087 |
| chr12 | 12619597 | 12619789 |
| chr12 | 12623024 | 12623232 |
| chr12 | 12647594 | 12647937 |
| chr12 | 12680554 | 12680714 |
| chr12 | 12680714 | 12680877 |
| chr12 | 12712670 | 12712820 |
| chr12 | 12713471 | 12713806 |
| chr12 | 12733515 | 12733688 |
| chr12 | 12796851 | 12797050 |
| chr12 | 12810098 | 12810712 |

|       |          |          |
|-------|----------|----------|
| chr12 | 12810712 | 12811248 |
| chr12 | 12811336 | 12811626 |
| chr12 | 12898812 | 12899008 |
| chr12 | 12902527 | 12902794 |
| chr12 | 12904649 | 12904952 |
| chr12 | 12909958 | 12910163 |
| chr12 | 12910411 | 12910939 |
| chr12 | 12920917 | 12921221 |
| chr12 | 12931184 | 12931344 |
| chr12 | 12941098 | 12941289 |
| chr12 | 12941297 | 12941452 |
| chr12 | 12941521 | 12942226 |
| chr12 | 12942226 | 12942684 |
| chr12 | 12942684 | 12942901 |
| chr12 | 12981361 | 12981511 |
| chr12 | 12982536 | 12983000 |
| chr12 | 12983033 | 12983308 |
| chr12 | 12983308 | 12983506 |
| chr12 | 13015126 | 13015337 |
| chr12 | 13060051 | 13060490 |
| chr12 | 13076987 | 13077345 |
| chr12 | 13077540 | 13077695 |
| chr12 | 13077763 | 13078298 |
| chr12 | 13092590 | 13092995 |
| chr12 | 13093248 | 13093398 |
| chr12 | 13094710 | 13095214 |
| chr12 | 13106998 | 13107209 |
| chr12 | 13113771 | 13114187 |
| chr12 | 13114187 | 13114607 |
| chr12 | 13114607 | 13114944 |
| chr12 | 13115047 | 13115298 |
| chr12 | 13133874 | 13134565 |
| chr12 | 13138004 | 13138255 |
| chr12 | 13144587 | 13145026 |
| chr12 | 13145026 | 13145270 |
| chr12 | 13145355 | 13145844 |
| chr12 | 13145934 | 13146106 |
| chr12 | 13150508 | 13151116 |
| chr12 | 13151460 | 13151915 |
| chr12 | 13167048 | 13167459 |
| chr12 | 13175846 | 13176027 |
| chr12 | 13176157 | 13176470 |



|       |          |          |
|-------|----------|----------|
| chr12 | 13176954 | 13177270 |
| chr12 | 13177453 | 13177692 |
| chr12 | 13177692 | 13177935 |
| chr12 | 13202080 | 13202827 |
| chr12 | 13204639 | 13204792 |
| chr12 | 13212108 | 13212409 |
| chr12 | 13213308 | 13213616 |
| chr12 | 13214941 | 13215216 |
| chr12 | 13217327 | 13218042 |
| chr12 | 13218042 | 13218566 |
| chr12 | 13240554 | 13240763 |
| chr12 | 13248647 | 13248982 |
| chr12 | 13248982 | 13249542 |
| chr12 | 13249630 | 13249851 |
| chr12 | 13255036 | 13255555 |
| chr12 | 13260873 | 13261058 |
| chr12 | 13268543 | 13268765 |
| chr12 | 13268765 | 13268954 |
| chr12 | 13268961 | 13269250 |
| chr12 | 13269250 | 13269575 |
| chr12 | 13269575 | 13269937 |
| chr12 | 13397218 | 13397453 |
| chr12 | 13410188 | 13410519 |
| chr12 | 13462392 | 13462642 |
| chr12 | 13487085 | 13487291 |
| chr12 | 13518143 | 13518465 |
| chr12 | 13575480 | 13575657 |
| chr12 | 13575737 | 13576478 |
| chr12 | 13602525 | 13602675 |
| chr12 | 13682994 | 13683207 |
| chr12 | 13748735 | 13748971 |
| chr12 | 13809339 | 13809666 |
| chr12 | 13878510 | 13878891 |
| chr12 | 13891301 | 13891757 |
| chr12 | 14027362 | 14027708 |
| chr12 | 14027732 | 14027906 |
| chr12 | 14068948 | 14069377 |
| chr12 | 14069377 | 14069702 |
| chr12 | 14091248 | 14091516 |
| chr12 | 14106462 | 14106625 |
| chr12 | 14125959 | 14126168 |
| chr12 | 14150045 | 14150301 |

|       |          |          |
|-------|----------|----------|
| chr12 | 14150301 | 14150552 |
| chr12 | 14150552 | 14150870 |
| chr12 | 14150949 | 14151183 |
| chr12 | 14151287 | 14151712 |
| chr12 | 14151812 | 14152380 |
| chr12 | 14160303 | 14160735 |
| chr12 | 14166937 | 14167151 |
| chr12 | 14167562 | 14167783 |
| chr12 | 14174381 | 14174560 |
| chr12 | 14189656 | 14189835 |
| chr12 | 14195228 | 14195385 |
| chr12 | 14206030 | 14206539 |
| chr12 | 14206580 | 14206840 |
| chr12 | 14210070 | 14210227 |
| chr12 | 14212681 | 14212975 |
| chr12 | 14213173 | 14213403 |
| chr12 | 14213459 | 14213619 |
| chr12 | 14244557 | 14244890 |
| chr12 | 14286156 | 14286465 |
| chr12 | 14286465 | 14286749 |
| chr12 | 14286749 | 14287063 |
| chr12 | 14301735 | 14302177 |
| chr12 | 14302382 | 14302647 |
| chr12 | 14302647 | 14302985 |
| chr12 | 14304145 | 14304387 |
| chr12 | 14315724 | 14316002 |
| chr12 | 14316002 | 14316413 |
| chr12 | 14375984 | 14376218 |
| chr12 | 14415297 | 14415737 |
| chr12 | 14415737 | 14416162 |
| chr12 | 14494487 | 14494685 |
| chr12 | 14578248 | 14578500 |
| chr12 | 14659305 | 14659647 |
| chr12 | 14659647 | 14659865 |
| chr12 | 14659871 | 14660085 |
| chr12 | 14744792 | 14744990 |
| chr12 | 14756375 | 14756525 |
| chr12 | 14880140 | 14880343 |
| chr12 | 14880570 | 14880781 |
| chr12 | 14994982 | 14995275 |
| chr12 | 14996381 | 14996531 |
| chr12 | 15011080 | 15011429 |

|       |          |          |
|-------|----------|----------|
| chr12 | 15064454 | 15064612 |
| chr12 | 15153678 | 15153915 |
| chr12 | 15488423 | 15488609 |
| chr12 | 15535948 | 15536110 |
| chr12 | 15566163 | 15566398 |
| chr12 | 15702161 | 15702468 |
| chr12 | 15704578 | 15704952 |
| chr12 | 15707729 | 15708025 |
| chr12 | 15718001 | 15718252 |
| chr12 | 15778588 | 15778773 |
| chr12 | 15800361 | 15800717 |
| chr12 | 15800881 | 15801492 |
| chr12 | 15811667 | 15812056 |
| chr12 | 15815762 | 15815963 |
| chr12 | 15816236 | 15816417 |
| chr12 | 15816648 | 15817291 |
| chr12 | 15830898 | 15831048 |
| chr12 | 15832377 | 15832623 |
| chr12 | 15832737 | 15833021 |
| chr12 | 15838040 | 15838600 |
| chr12 | 15848493 | 15848879 |
| chr12 | 15849877 | 15850195 |
| chr12 | 15850502 | 15850970 |
| chr12 | 15855598 | 15855827 |
| chr12 | 15862010 | 15862178 |
| chr12 | 15904571 | 15904983 |
| chr12 | 15912375 | 15912751 |
| chr12 | 15912842 | 15913078 |
| chr12 | 15913078 | 15913345 |
| chr12 | 16006642 | 16007097 |
| chr12 | 16012135 | 16012332 |
| chr12 | 16015450 | 16015694 |
| chr12 | 16145486 | 16145995 |
| chr12 | 16151163 | 16151457 |
| chr12 | 16152246 | 16152427 |
| chr12 | 16154216 | 16154635 |
| chr12 | 16161947 | 16162275 |
| chr12 | 16167869 | 16168093 |
| chr12 | 16170158 | 16170552 |
| chr12 | 16190821 | 16190978 |
| chr12 | 16210698 | 16210874 |
| chr12 | 16344079 | 16344301 |

|       |          |          |
|-------|----------|----------|
| chr12 | 16477677 | 16477883 |
| chr12 | 16507484 | 16507701 |
| chr12 | 16509424 | 16509700 |
| chr12 | 16526112 | 16526541 |
| chr12 | 16526681 | 16526890 |
| chr12 | 16532093 | 16532267 |
| chr12 | 16532427 | 16532827 |
| chr12 | 16532827 | 16533173 |
| chr12 | 16533272 | 16533641 |
| chr12 | 16539187 | 16539337 |
| chr12 | 16550257 | 16550407 |
| chr12 | 16554623 | 16554834 |
| chr12 | 16563478 | 16563773 |
| chr12 | 16565010 | 16565188 |
| chr12 | 16568575 | 16568838 |
| chr12 | 16574183 | 16574412 |
| chr12 | 16580407 | 16580828 |
| chr12 | 16589509 | 16589951 |
| chr12 | 16591443 | 16592002 |
| chr12 | 16618616 | 16618898 |
| chr12 | 16618898 | 16619343 |
| chr12 | 16620228 | 16620494 |
| chr12 | 16622193 | 16622343 |
| chr12 | 16632376 | 16632590 |
| chr12 | 16634482 | 16634729 |
| chr12 | 16635836 | 16636185 |
| chr12 | 16636844 | 16637080 |
| chr12 | 16653442 | 16654046 |
| chr12 | 16664921 | 16665513 |
| chr12 | 16717706 | 16717968 |
| chr12 | 16718970 | 16719239 |
| chr12 | 16720566 | 16720756 |
| chr12 | 16747747 | 16747987 |
| chr12 | 16753179 | 16753365 |
| chr12 | 16754396 | 16754600 |
| chr12 | 16778995 | 16779208 |
| chr12 | 16779208 | 16779509 |
| chr12 | 16788676 | 16788929 |
| chr12 | 16790461 | 16790793 |
| chr12 | 16790793 | 16790994 |
| chr12 | 16794663 | 16794833 |
| chr12 | 16795802 | 16796163 |

|       |          |          |
|-------|----------|----------|
| chr12 | 16800465 | 16800774 |
| chr12 | 16805573 | 16805862 |
| chr12 | 16808118 | 16808376 |
| chr12 | 16810676 | 16811095 |
| chr12 | 16811095 | 16811466 |
| chr12 | 16811485 | 16811672 |
| chr12 | 16811744 | 16811894 |
| chr12 | 16822507 | 16822664 |
| chr12 | 16828473 | 16828844 |
| chr12 | 16829841 | 16830120 |
| chr12 | 16831172 | 16831392 |
| chr12 | 16833767 | 16834033 |
| chr12 | 16840845 | 16841411 |
| chr12 | 16841411 | 16841729 |
| chr12 | 16847558 | 16847788 |
| chr12 | 16849696 | 16850154 |
| chr12 | 16850539 | 16850892 |
| chr12 | 16850892 | 16851211 |
| chr12 | 16853348 | 16853785 |
| chr12 | 16853785 | 16854192 |
| chr12 | 16856067 | 16856217 |
| chr12 | 16860004 | 16860295 |
| chr12 | 16860715 | 16860907 |
| chr12 | 16864653 | 16864817 |
| chr12 | 16868974 | 16869167 |
| chr12 | 16869930 | 16870114 |
| chr12 | 16870114 | 16870320 |
| chr12 | 16870320 | 16870912 |
| chr12 | 16872087 | 16872369 |
| chr12 | 16872983 | 16873226 |
| chr12 | 16873266 | 16873539 |
| chr12 | 16873573 | 16873725 |
| chr12 | 16874149 | 16874665 |
| chr12 | 16875372 | 16875563 |
| chr12 | 16886460 | 16886956 |
| chr12 | 16890558 | 16890725 |
| chr12 | 16893981 | 16894332 |
| chr12 | 16894332 | 16894679 |
| chr12 | 16894679 | 16894978 |
| chr12 | 16894978 | 16895227 |
| chr12 | 16895447 | 16895670 |
| chr12 | 16896138 | 16896461 |

|       |          |          |
|-------|----------|----------|
| chr12 | 16900071 | 16900301 |
| chr12 | 16900858 | 16901257 |
| chr12 | 16908005 | 16908220 |
| chr12 | 16908379 | 16908598 |
| chr12 | 16920036 | 16920262 |
| chr12 | 16920262 | 16920552 |
| chr12 | 16920552 | 16920865 |
| chr12 | 16928033 | 16928236 |
| chr12 | 16930822 | 16930972 |
| chr12 | 16958916 | 16959185 |
| chr12 | 16985894 | 16986074 |
| chr12 | 16990939 | 16991101 |
| chr12 | 16999333 | 16999489 |
| chr12 | 16999761 | 17000260 |
| chr12 | 17000260 | 17000605 |
| chr12 | 17001218 | 17001545 |
| chr12 | 17011425 | 17011639 |
| chr12 | 17011639 | 17011888 |
| chr12 | 17012366 | 17012575 |
| chr12 | 17012725 | 17013061 |
| chr12 | 17033216 | 17033437 |
| chr12 | 17035275 | 17035488 |
| chr12 | 17040357 | 17040519 |
| chr12 | 17040565 | 17040952 |
| chr12 | 17044306 | 17044548 |
| chr12 | 17047547 | 17047888 |
| chr12 | 17055767 | 17056160 |
| chr12 | 17057033 | 17057409 |
| chr12 | 17058653 | 17058960 |
| chr12 | 17075776 | 17075983 |
| chr12 | 17076448 | 17076879 |
| chr12 | 17084982 | 17085163 |
| chr12 | 17085179 | 17085580 |
| chr12 | 17085614 | 17085764 |
| chr12 | 17105104 | 17105386 |
| chr12 | 17134392 | 17134668 |
| chr12 | 17134668 | 17135168 |
| chr12 | 17135701 | 17135947 |
| chr12 | 17136521 | 17136909 |
| chr12 | 17152494 | 17152648 |
| chr12 | 17152876 | 17153323 |
| chr12 | 17175666 | 17175816 |

|       |          |          |
|-------|----------|----------|
| chr12 | 17176062 | 17176493 |
| chr12 | 17176493 | 17176968 |
| chr12 | 17183901 | 17184051 |
| chr12 | 17184216 | 17184560 |
| chr12 | 17184560 | 17184922 |
| chr12 | 17209586 | 17210052 |
| chr12 | 17220176 | 17220539 |
| chr12 | 17220539 | 17221157 |
| chr12 | 17230789 | 17230943 |
| chr12 | 17236060 | 17236560 |
| chr12 | 17242124 | 17242344 |
| chr12 | 17250542 | 17250805 |
| chr12 | 17250988 | 17251288 |
| chr12 | 17253093 | 17253363 |
| chr12 | 17256955 | 17257399 |
| chr12 | 17258066 | 17258322 |
| chr12 | 17258322 | 17258548 |
| chr12 | 17266239 | 17266673 |
| chr12 | 17266673 | 17267108 |
| chr12 | 17271401 | 17271583 |
| chr12 | 17288574 | 17288911 |
| chr12 | 17288911 | 17289280 |
| chr12 | 17289280 | 17289642 |
| chr12 | 17289663 | 17289901 |
| chr12 | 17289932 | 17290272 |
| chr12 | 17298366 | 17298566 |
| chr12 | 17302611 | 17302765 |
| chr12 | 17303378 | 17303848 |
| chr12 | 17303848 | 17304218 |
| chr12 | 17304889 | 17305132 |
| chr12 | 17311953 | 17312190 |
| chr12 | 17314013 | 17314292 |
| chr12 | 17315091 | 17315252 |
| chr12 | 17324084 | 17324470 |
| chr12 | 17324470 | 17325013 |
| chr12 | 17325013 | 17325345 |
| chr12 | 17326729 | 17326986 |
| chr12 | 17334312 | 17334479 |
| chr12 | 17335912 | 17336141 |
| chr12 | 17338412 | 17338808 |
| chr12 | 17339194 | 17339437 |
| chr12 | 17339470 | 17339649 |

|       |          |          |
|-------|----------|----------|
| chr12 | 17339649 | 17339823 |
| chr12 | 17347903 | 17348082 |
| chr12 | 17348084 | 17348248 |
| chr12 | 17348266 | 17348635 |
| chr12 | 17348635 | 17348932 |
| chr12 | 17355628 | 17355854 |
| chr12 | 17356949 | 17357158 |
| chr12 | 17367029 | 17367381 |
| chr12 | 17372791 | 17372985 |
| chr12 | 17373557 | 17373966 |
| chr12 | 17373966 | 17374432 |
| chr12 | 17381058 | 17381394 |
| chr12 | 17388061 | 17388377 |
| chr12 | 17390154 | 17390501 |
| chr12 | 17390501 | 17390852 |
| chr12 | 17414822 | 17415243 |
| chr12 | 17420065 | 17420429 |
| chr12 | 17420429 | 17420721 |
| chr12 | 17420762 | 17420927 |
| chr12 | 17436542 | 17436716 |
| chr12 | 17437922 | 17438129 |
| chr12 | 17438185 | 17438363 |
| chr12 | 17438431 | 17438584 |
| chr12 | 17439282 | 17439479 |
| chr12 | 17440448 | 17440789 |
| chr12 | 17449662 | 17450069 |
| chr12 | 17450069 | 17450529 |
| chr12 | 17455080 | 17455278 |
| chr12 | 17481732 | 17482085 |
| chr12 | 17492207 | 17492464 |
| chr12 | 17492564 | 17492996 |
| chr12 | 17495868 | 17496103 |
| chr12 | 17496103 | 17496376 |
| chr12 | 17507020 | 17507260 |
| chr12 | 17507260 | 17507553 |
| chr12 | 17510087 | 17510673 |
| chr12 | 17510977 | 17511331 |
| chr12 | 17530928 | 17531078 |
| chr12 | 17537125 | 17537300 |
| chr12 | 17540785 | 17540985 |
| chr12 | 17542569 | 17542937 |
| chr12 | 17544288 | 17544536 |



|       |          |          |
|-------|----------|----------|
| chr12 | 17544536 | 17544796 |
| chr12 | 17544796 | 17545057 |
| chr12 | 17545057 | 17545453 |
| chr12 | 17549307 | 17549482 |
| chr12 | 17549482 | 17549666 |
| chr12 | 17551135 | 17551487 |
| chr12 | 17551602 | 17551755 |
| chr12 | 17552800 | 17553073 |
| chr12 | 17553073 | 17553466 |
| chr12 | 17553611 | 17553884 |
| chr12 | 17553884 | 17554054 |
| chr12 | 17554105 | 17554403 |
| chr12 | 17554410 | 17554587 |
| chr12 | 17574296 | 17574468 |
| chr12 | 17576129 | 17576336 |
| chr12 | 17577628 | 17577803 |
| chr12 | 17578692 | 17578927 |
| chr12 | 17594015 | 17594339 |
| chr12 | 17607136 | 17607341 |
| chr12 | 17610554 | 17610705 |
| chr12 | 17622872 | 17623120 |
| chr12 | 17641358 | 17641626 |
| chr12 | 17644648 | 17644862 |
| chr12 | 17665865 | 17666017 |
| chr12 | 17666680 | 17666924 |
| chr12 | 17667395 | 17667545 |
| chr12 | 17680302 | 17680534 |
| chr12 | 17681030 | 17681280 |
| chr12 | 17688952 | 17689222 |
| chr12 | 17690257 | 17690625 |
| chr12 | 17690625 | 17690944 |
| chr12 | 17690944 | 17691288 |
| chr12 | 17691343 | 17691520 |
| chr12 | 17691548 | 17691745 |
| chr12 | 17691942 | 17692114 |
| chr12 | 17692194 | 17692424 |
| chr12 | 17694559 | 17694779 |
| chr12 | 17694779 | 17695072 |
| chr12 | 17702024 | 17702189 |
| chr12 | 17709601 | 17709785 |
| chr12 | 17710358 | 17710556 |
| chr12 | 17710884 | 17711162 |

|       |          |          |
|-------|----------|----------|
| chr12 | 17711453 | 17711793 |
| chr12 | 17711793 | 17712077 |
| chr12 | 17712077 | 17712500 |
| chr12 | 17721023 | 17721355 |
| chr12 | 17722640 | 17723338 |
| chr12 | 17726571 | 17726811 |
| chr12 | 17729078 | 17729257 |
| chr12 | 17729332 | 17729689 |
| chr12 | 17729689 | 17729953 |
| chr12 | 17732846 | 17733092 |
| chr12 | 17733092 | 17733484 |
| chr12 | 17738348 | 17739182 |
| chr12 | 17746712 | 17747026 |
| chr12 | 17747315 | 17747525 |
| chr12 | 17747581 | 17747790 |
| chr12 | 17749709 | 17750126 |
| chr12 | 17750372 | 17750894 |
| chr12 | 17751743 | 17751901 |
| chr12 | 17754900 | 17755053 |
| chr12 | 17756434 | 17756625 |
| chr12 | 17756689 | 17757111 |
| chr12 | 17757111 | 17757395 |
| chr12 | 17762373 | 17762600 |
| chr12 | 17772747 | 17773095 |
| chr12 | 17773095 | 17773432 |
| chr12 | 17773511 | 17774142 |
| chr12 | 17778446 | 17778658 |
| chr12 | 17795011 | 17795289 |
| chr12 | 17795427 | 17795657 |
| chr12 | 17795776 | 17795978 |
| chr12 | 17795978 | 17796221 |
| chr12 | 17808493 | 17808680 |
| chr12 | 17808680 | 17808971 |
| chr12 | 17852234 | 17852445 |
| chr12 | 17872339 | 17872976 |
| chr12 | 17873796 | 17873950 |
| chr12 | 17881337 | 17881626 |
| chr12 | 17881626 | 17882057 |
| chr12 | 17882057 | 17882568 |
| chr12 | 17882811 | 17882961 |
| chr12 | 17887255 | 17887472 |
| chr12 | 17887472 | 17887824 |

|       |          |          |
|-------|----------|----------|
| chr12 | 17913042 | 17913440 |
| chr12 | 17914332 | 17914629 |
| chr12 | 17992537 | 17993039 |
| chr12 | 17993039 | 17993504 |
| chr12 | 17997829 | 17998098 |
| chr12 | 17998102 | 17998727 |
| chr12 | 18004302 | 18004485 |
| chr12 | 18054524 | 18054759 |
| chr12 | 18393792 | 18394002 |
| chr12 | 18514131 | 18514621 |
| chr12 | 18514621 | 18515124 |
| chr12 | 18515262 | 18515412 |
| chr12 | 18519782 | 18520019 |
| chr12 | 18546257 | 18546542 |
| chr12 | 18549593 | 18549790 |
| chr12 | 18609788 | 18610272 |
| chr12 | 18610272 | 18610698 |
| chr12 | 18610908 | 18611145 |
| chr12 | 18615274 | 18615754 |
| chr12 | 18622531 | 18622714 |
| chr12 | 18672193 | 18672389 |
| chr12 | 18689809 | 18690014 |
| chr12 | 18766095 | 18766264 |
| chr12 | 18788619 | 18788822 |
| chr12 | 18853387 | 18853582 |
| chr12 | 18853874 | 18854086 |
| chr12 | 18859355 | 18859601 |
| chr12 | 18884490 | 18884696 |
| chr12 | 19049276 | 19049472 |
| chr12 | 19057271 | 19057427 |
| chr12 | 19061638 | 19061867 |
| chr12 | 19120309 | 19120504 |
| chr12 | 19120504 | 19120736 |
| chr12 | 19122102 | 19122312 |
| chr12 | 19175672 | 19175830 |
| chr12 | 19181226 | 19181522 |
| chr12 | 19207536 | 19207813 |
| chr12 | 19208822 | 19209031 |
| chr12 | 19211091 | 19211276 |
| chr12 | 19243302 | 19243458 |
| chr12 | 19288273 | 19288707 |
| chr12 | 19288794 | 19289017 |

|       |          |          |
|-------|----------|----------|
| chr12 | 19387248 | 19387529 |
| chr12 | 19387529 | 19387977 |
| chr12 | 19387977 | 19388398 |
| chr12 | 19388628 | 19388813 |
| chr12 | 19393642 | 19393851 |
| chr12 | 19418522 | 19418813 |
| chr12 | 19606539 | 19606737 |
| chr12 | 19612390 | 19612712 |
| chr12 | 19643221 | 19643371 |
| chr12 | 19647488 | 19647750 |
| chr12 | 19743748 | 19743978 |
| chr12 | 19953924 | 19954218 |
| chr12 | 19959652 | 19959892 |
| chr12 | 20196372 | 20196804 |
| chr12 | 20196804 | 20197215 |
| chr12 | 20197459 | 20197613 |
| chr12 | 20202154 | 20202437 |
| chr12 | 20226940 | 20227090 |
| chr12 | 20228447 | 20228700 |
| chr12 | 20228700 | 20228956 |
| chr12 | 20230985 | 20231158 |
| chr12 | 20231411 | 20231597 |
| chr12 | 20231684 | 20231874 |
| chr12 | 20231899 | 20232104 |
| chr12 | 20233223 | 20233442 |
| chr12 | 20233551 | 20233729 |
| chr12 | 20233860 | 20234069 |
| chr12 | 20234071 | 20234280 |
| chr12 | 20298356 | 20298506 |
| chr12 | 20312082 | 20312343 |
| chr12 | 20415413 | 20415697 |
| chr12 | 20422012 | 20422239 |
| chr12 | 20444350 | 20444554 |
| chr12 | 20451497 | 20451657 |
| chr12 | 20493014 | 20493345 |
| chr12 | 20614472 | 20614687 |
| chr12 | 20614696 | 20615182 |
| chr12 | 20615182 | 20615627 |
| chr12 | 20620365 | 20620822 |
| chr12 | 20646214 | 20646547 |
| chr12 | 20698946 | 20699240 |
| chr12 | 20704020 | 20704273 |

|       |          |          |
|-------|----------|----------|
| chr12 | 20727492 | 20727642 |
| chr12 | 20782135 | 20782310 |
| chr12 | 20809744 | 20809945 |
| chr12 | 20815175 | 20815606 |
| chr12 | 20815606 | 20816079 |
| chr12 | 20816098 | 20816303 |
| chr12 | 20844975 | 20845181 |
| chr12 | 20870125 | 20870300 |
| chr12 | 20884183 | 20884412 |
| chr12 | 20884894 | 20885230 |
| chr12 | 20914726 | 20914995 |
| chr12 | 20919519 | 20919867 |
| chr12 | 20920137 | 20920553 |
| chr12 | 20920553 | 20920945 |
| chr12 | 20920945 | 20921197 |
| chr12 | 20921197 | 20921621 |
| chr12 | 20929036 | 20929294 |
| chr12 | 20943022 | 20943183 |
| chr12 | 20989909 | 20990213 |
| chr12 | 20990213 | 20990637 |
| chr12 | 20990637 | 20991156 |
| chr12 | 20999004 | 20999303 |
| chr12 | 21030956 | 21031196 |
| chr12 | 21075814 | 21076074 |
| chr12 | 21087644 | 21087794 |
| chr12 | 21090240 | 21090467 |
| chr12 | 21104917 | 21105067 |
| chr12 | 21111173 | 21111463 |
| chr12 | 21111463 | 21111896 |
| chr12 | 21111896 | 21112467 |
| chr12 | 21112562 | 21112872 |
| chr12 | 21116828 | 21117466 |
| chr12 | 21118589 | 21118758 |
| chr12 | 21119635 | 21119904 |
| chr12 | 21131635 | 21131941 |
| chr12 | 21132074 | 21132326 |
| chr12 | 21132691 | 21132931 |
| chr12 | 21133059 | 21133358 |
| chr12 | 21135708 | 21136532 |
| chr12 | 21142516 | 21142844 |
| chr12 | 21142859 | 21143184 |
| chr12 | 21143795 | 21143970 |

|       |          |          |
|-------|----------|----------|
| chr12 | 21144587 | 21144999 |
| chr12 | 21144999 | 21145432 |
| chr12 | 21151365 | 21151905 |
| chr12 | 21155245 | 21155395 |
| chr12 | 21159755 | 21159920 |
| chr12 | 21160155 | 21160405 |
| chr12 | 21160405 | 21160845 |
| chr12 | 21165087 | 21165330 |
| chr12 | 21165814 | 21166117 |
| chr12 | 21166117 | 21166454 |
| chr12 | 21166892 | 21167221 |
| chr12 | 21167252 | 21167624 |
| chr12 | 21174979 | 21175170 |
| chr12 | 21175401 | 21175827 |
| chr12 | 21176477 | 21176737 |
| chr12 | 21180618 | 21180819 |
| chr12 | 21182085 | 21182249 |
| chr12 | 21182883 | 21183070 |
| chr12 | 21191639 | 21191805 |
| chr12 | 21194560 | 21194712 |
| chr12 | 21195544 | 21195791 |
| chr12 | 21200647 | 21200960 |
| chr12 | 21201305 | 21201540 |
| chr12 | 21204718 | 21204996 |
| chr12 | 21205926 | 21206076 |
| chr12 | 21207395 | 21207776 |
| chr12 | 21208148 | 21208386 |
| chr12 | 21225497 | 21225664 |
| chr12 | 21226305 | 21226726 |
| chr12 | 21227013 | 21227468 |
| chr12 | 21227468 | 21227946 |
| chr12 | 21234668 | 21234936 |
| chr12 | 21243310 | 21243460 |
| chr12 | 21247831 | 21247981 |
| chr12 | 21250652 | 21250875 |
| chr12 | 21252778 | 21253019 |
| chr12 | 21260937 | 21261180 |
| chr12 | 21264340 | 21264559 |
| chr12 | 21264649 | 21264981 |
| chr12 | 21265953 | 21266249 |
| chr12 | 21266425 | 21266861 |
| chr12 | 21271153 | 21271318 |

|       |          |          |
|-------|----------|----------|
| chr12 | 21274533 | 21274715 |
| chr12 | 21278139 | 21278341 |
| chr12 | 21278973 | 21279190 |
| chr12 | 21285518 | 21285838 |
| chr12 | 21285838 | 21286061 |
| chr12 | 21286061 | 21286239 |
| chr12 | 21286239 | 21286657 |
| chr12 | 21286803 | 21286994 |
| chr12 | 21287046 | 21287291 |
| chr12 | 21316105 | 21316483 |
| chr12 | 21316483 | 21316771 |
| chr12 | 21318224 | 21318468 |
| chr12 | 21335858 | 21336197 |
| chr12 | 21336197 | 21336478 |
| chr12 | 21336569 | 21336740 |
| chr12 | 21373135 | 21373446 |
| chr12 | 21373446 | 21373803 |
| chr12 | 21373803 | 21374180 |
| chr12 | 21406234 | 21406457 |
| chr12 | 21407785 | 21407946 |
| chr12 | 21409848 | 21409998 |
| chr12 | 21417031 | 21417417 |
| chr12 | 21417417 | 21417728 |
| chr12 | 21417728 | 21418054 |
| chr12 | 21424642 | 21425024 |
| chr12 | 21425371 | 21425717 |
| chr12 | 21426174 | 21426397 |
| chr12 | 21426533 | 21426868 |
| chr12 | 21430099 | 21430449 |
| chr12 | 21431167 | 21431344 |
| chr12 | 21436783 | 21437056 |
| chr12 | 21437056 | 21437425 |
| chr12 | 21437505 | 21437771 |
| chr12 | 21441940 | 21442187 |
| chr12 | 21463551 | 21463738 |
| chr12 | 21467484 | 21467729 |
| chr12 | 21471299 | 21471493 |
| chr12 | 21472418 | 21472917 |
| chr12 | 21480244 | 21480600 |
| chr12 | 21494064 | 21494279 |
| chr12 | 21518338 | 21518494 |
| chr12 | 21525646 | 21525885 |

|       |          |          |
|-------|----------|----------|
| chr12 | 21526925 | 21527291 |
| chr12 | 21543160 | 21543354 |
| chr12 | 21543354 | 21543605 |
| chr12 | 21565260 | 21565534 |
| chr12 | 21580010 | 21580259 |
| chr12 | 21613845 | 21614093 |
| chr12 | 21696081 | 21696384 |
| chr12 | 21743835 | 21744009 |
| chr12 | 21748495 | 21748704 |
| chr12 | 21749348 | 21749556 |
| chr12 | 21749822 | 21750058 |
| chr12 | 21772231 | 21772522 |
| chr12 | 21778291 | 21778732 |
| chr12 | 21778732 | 21779161 |
| chr12 | 21783946 | 21784379 |
| chr12 | 21784379 | 21784865 |
| chr12 | 21898200 | 21898422 |
| chr12 | 21899231 | 21899419 |
| chr12 | 21940356 | 21940513 |
| chr12 | 21965049 | 21965199 |
| chr12 | 22024934 | 22025245 |
| chr12 | 22232192 | 22232377 |
| chr12 | 22257294 | 22257548 |
| chr12 | 22261731 | 22261986 |
| chr12 | 22269702 | 22269964 |
| chr12 | 22385741 | 22385902 |
| chr12 | 22460994 | 22461305 |
| chr12 | 22466507 | 22466657 |
| chr12 | 22467001 | 22467189 |
| chr12 | 22617338 | 22617602 |
| chr12 | 22622335 | 22622495 |
| chr12 | 22622812 | 22622974 |
| chr12 | 22623189 | 22623644 |
| chr12 | 22708125 | 22708311 |
| chr12 | 22739860 | 22740159 |
| chr12 | 22745582 | 22745875 |
| chr12 | 22811392 | 22811570 |
| chr12 | 22900486 | 22900775 |
| chr12 | 22905404 | 22905601 |
| chr12 | 22906368 | 22906657 |
| chr12 | 23004512 | 23004758 |
| chr12 | 23009696 | 23009858 |



|       |          |          |
|-------|----------|----------|
| chr12 | 23009926 | 23010250 |
| chr12 | 23010250 | 23010494 |
| chr12 | 23023728 | 23024106 |
| chr12 | 23105113 | 23105295 |
| chr12 | 23122827 | 23122997 |
| chr12 | 23125011 | 23125193 |
| chr12 | 23183898 | 23184237 |
| chr12 | 23189193 | 23189374 |
| chr12 | 23189600 | 23189896 |
| chr12 | 23217436 | 23217586 |
| chr12 | 23384679 | 23384857 |
| chr12 | 23409660 | 23409878 |
| chr12 | 23414102 | 23414351 |
| chr12 | 23422108 | 23422303 |
| chr12 | 23597723 | 23598246 |
| chr12 | 23605327 | 23605559 |
| chr12 | 23605727 | 23606081 |
| chr12 | 23628721 | 23629008 |
| chr12 | 23634609 | 23634800 |
| chr12 | 23720509 | 23720662 |
| chr12 | 23743749 | 23743902 |
| chr12 | 23758744 | 23758907 |
| chr12 | 23765683 | 23765874 |
| chr12 | 23794927 | 23795167 |
| chr12 | 23800748 | 23800968 |
| chr12 | 23800968 | 23801186 |
| chr12 | 23963088 | 23963348 |
| chr12 | 23968128 | 23968281 |
| chr12 | 23968618 | 23968798 |
| chr12 | 23968961 | 23969425 |
| chr12 | 24054070 | 24054240 |
| chr12 | 24082258 | 24082761 |
| chr12 | 24091379 | 24091591 |
| chr12 | 24096243 | 24096428 |
| chr12 | 24096731 | 24097071 |
| chr12 | 24097071 | 24097488 |
| chr12 | 24186585 | 24186749 |
| chr12 | 24246380 | 24246686 |
| chr12 | 24246686 | 24246883 |
| chr12 | 24251417 | 24251642 |
| chr12 | 24251810 | 24252293 |
| chr12 | 24252293 | 24252755 |

|       |          |          |
|-------|----------|----------|
| chr12 | 24408959 | 24409319 |
| chr12 | 24462178 | 24462455 |
| chr12 | 24463459 | 24463933 |
| chr12 | 24467701 | 24467899 |
| chr12 | 24471017 | 24471258 |
| chr12 | 24471336 | 24471927 |
| chr12 | 24473218 | 24473649 |
| chr12 | 24487092 | 24487278 |
| chr12 | 24488287 | 24488607 |
| chr12 | 24498266 | 24498885 |
| chr12 | 24498885 | 24499118 |
| chr12 | 24499158 | 24499310 |
| chr12 | 24525095 | 24525474 |
| chr12 | 24564618 | 24564971 |
| chr12 | 24565350 | 24565551 |
| chr12 | 24565551 | 24565738 |
| chr12 | 24571793 | 24572746 |
| chr12 | 24592035 | 24592255 |
| chr12 | 24592895 | 24593173 |
| chr12 | 24593173 | 24593469 |
| chr12 | 24593469 | 24593810 |
| chr12 | 24600830 | 24601191 |
| chr12 | 24603358 | 24603580 |
| chr12 | 24603995 | 24604351 |
| chr12 | 24612314 | 24612464 |
| chr12 | 24613427 | 24613644 |
| chr12 | 24623770 | 24624120 |
| chr12 | 24630278 | 24630565 |
| chr12 | 24633865 | 24634042 |
| chr12 | 24642355 | 24642566 |
| chr12 | 24642669 | 24642819 |
| chr12 | 24642831 | 24643038 |
| chr12 | 24643040 | 24643228 |
| chr12 | 24650938 | 24651521 |
| chr12 | 24651521 | 24651955 |
| chr12 | 24651955 | 24652470 |
| chr12 | 24660036 | 24660281 |
| chr12 | 24661220 | 24661391 |
| chr12 | 24663254 | 24663447 |
| chr12 | 24674508 | 24674663 |
| chr12 | 24675435 | 24675798 |
| chr12 | 24680526 | 24680763 |

|       |          |          |
|-------|----------|----------|
| chr12 | 24680763 | 24681083 |
| chr12 | 24681742 | 24681946 |
| chr12 | 24685955 | 24686182 |
| chr12 | 24686182 | 24686432 |
| chr12 | 24686432 | 24686724 |
| chr12 | 24693743 | 24693928 |
| chr12 | 24696467 | 24696721 |
| chr12 | 24697119 | 24697432 |
| chr12 | 24697625 | 24697890 |
| chr12 | 24705964 | 24706116 |
| chr12 | 24706850 | 24707121 |
| chr12 | 24707352 | 24707836 |
| chr12 | 24707867 | 24708426 |
| chr12 | 24708426 | 24708947 |
| chr12 | 24710194 | 24710479 |
| chr12 | 24716534 | 24716732 |
| chr12 | 24716937 | 24717382 |
| chr12 | 24723073 | 24723290 |
| chr12 | 24723393 | 24723653 |
| chr12 | 24723858 | 24724328 |
| chr12 | 24724328 | 24724786 |
| chr12 | 24734702 | 24735165 |
| chr12 | 24735165 | 24735600 |
| chr12 | 24738852 | 24739029 |
| chr12 | 24741677 | 24741834 |
| chr12 | 24745366 | 24745592 |
| chr12 | 24750617 | 24750840 |
| chr12 | 24753069 | 24753219 |
| chr12 | 24766892 | 24767263 |
| chr12 | 24767637 | 24767816 |
| chr12 | 24779150 | 24779390 |
| chr12 | 24789772 | 24789972 |
| chr12 | 24793336 | 24793607 |
| chr12 | 24793607 | 24794024 |
| chr12 | 24798559 | 24798729 |
| chr12 | 24803337 | 24803970 |
| chr12 | 24822889 | 24823142 |
| chr12 | 24830722 | 24831132 |
| chr12 | 24831132 | 24831502 |
| chr12 | 24831502 | 24831706 |
| chr12 | 24831706 | 24831921 |
| chr12 | 24831921 | 24832176 |

|       |          |          |
|-------|----------|----------|
| chr12 | 24841619 | 24841773 |
| chr12 | 24843461 | 24844184 |
| chr12 | 24844233 | 24844591 |
| chr12 | 24845475 | 24845846 |
| chr12 | 24856098 | 24856313 |
| chr12 | 24856937 | 24857112 |
| chr12 | 24859450 | 24859608 |
| chr12 | 24891108 | 24891665 |
| chr12 | 24894079 | 24894375 |
| chr12 | 24894413 | 24894563 |
| chr12 | 24895353 | 24895856 |
| chr12 | 24928620 | 24928836 |
| chr12 | 24940542 | 24940889 |
| chr12 | 24940995 | 24941219 |
| chr12 | 24948345 | 24948716 |
| chr12 | 24950635 | 24950978 |
| chr12 | 24952098 | 24952515 |
| chr12 | 24974616 | 24975133 |
| chr12 | 24975133 | 24975440 |
| chr12 | 24975480 | 24975750 |
| chr12 | 25005351 | 25005754 |
| chr12 | 25012074 | 25012530 |
| chr12 | 25012612 | 25012912 |
| chr12 | 25012914 | 25013232 |
| chr12 | 25013232 | 25013485 |
| chr12 | 25015894 | 25016062 |
| chr12 | 25025258 | 25025466 |
| chr12 | 25027411 | 25027645 |
| chr12 | 25057910 | 25058067 |
| chr12 | 25059715 | 25060299 |
| chr12 | 25092190 | 25092641 |
| chr12 | 25092641 | 25093211 |
| chr12 | 25095951 | 25096518 |
| chr12 | 25098549 | 25098785 |
| chr12 | 25098785 | 25099102 |
| chr12 | 25099463 | 25099774 |
| chr12 | 25101559 | 25101709 |
| chr12 | 25108839 | 25109070 |
| chr12 | 25110081 | 25110325 |
| chr12 | 25110325 | 25110670 |
| chr12 | 25110670 | 25111039 |
| chr12 | 25117688 | 25117854 |

|       |          |          |
|-------|----------|----------|
| chr12 | 25117888 | 25118309 |
| chr12 | 25131832 | 25132678 |
| chr12 | 25141129 | 25141290 |
| chr12 | 25143592 | 25143809 |
| chr12 | 25144558 | 25144810 |
| chr12 | 25155247 | 25155775 |
| chr12 | 25155775 | 25156096 |
| chr12 | 25162094 | 25162244 |
| chr12 | 25163558 | 25163806 |
| chr12 | 25164711 | 25165136 |
| chr12 | 25165585 | 25166231 |
| chr12 | 25166233 | 25166393 |
| chr12 | 25169600 | 25169975 |
| chr12 | 25175960 | 25176136 |
| chr12 | 25176136 | 25176314 |
| chr12 | 25180342 | 25180665 |
| chr12 | 25180936 | 25181196 |
| chr12 | 25181327 | 25181907 |
| chr12 | 25189217 | 25189478 |
| chr12 | 25189478 | 25189762 |
| chr12 | 25190396 | 25190775 |
| chr12 | 25193798 | 25193992 |
| chr12 | 25203578 | 25204066 |
| chr12 | 25208929 | 25209179 |
| chr12 | 25209179 | 25209411 |
| chr12 | 25209411 | 25209986 |
| chr12 | 25216600 | 25217250 |
| chr12 | 25226353 | 25226555 |
| chr12 | 25227799 | 25228145 |
| chr12 | 25232978 | 25233458 |
| chr12 | 25239247 | 25239397 |
| chr12 | 25240082 | 25240397 |
| chr12 | 25240657 | 25240851 |
| chr12 | 25244621 | 25245139 |
| chr12 | 25245139 | 25245722 |
| chr12 | 25251571 | 25251850 |
| chr12 | 25258449 | 25258727 |
| chr12 | 25266024 | 25266224 |
| chr12 | 25268193 | 25268746 |
| chr12 | 25268882 | 25269073 |
| chr12 | 25269162 | 25269440 |
| chr12 | 25270777 | 25271049 |

|       |          |          |
|-------|----------|----------|
| chr12 | 25277484 | 25277685 |
| chr12 | 25281449 | 25281921 |
| chr12 | 25282263 | 25282729 |
| chr12 | 25283769 | 25284109 |
| chr12 | 25298905 | 25299079 |
| chr12 | 25306090 | 25306361 |
| chr12 | 25310309 | 25310477 |
| chr12 | 25311677 | 25312141 |
| chr12 | 25318853 | 25319006 |
| chr12 | 25342360 | 25342558 |
| chr12 | 25360272 | 25360466 |
| chr12 | 25372573 | 25372797 |
| chr12 | 25378089 | 25378475 |
| chr12 | 25383068 | 25383387 |
| chr12 | 25383401 | 25383765 |
| chr12 | 25385244 | 25385449 |
| chr12 | 25389025 | 25389281 |
| chr12 | 25396090 | 25396315 |
| chr12 | 25438457 | 25438747 |
| chr12 | 25438747 | 25439307 |
| chr12 | 25475518 | 25475693 |
| chr12 | 25505654 | 25505817 |
| chr12 | 25530621 | 25530854 |
| chr12 | 25531190 | 25531417 |
| chr12 | 25543139 | 25543491 |
| chr12 | 25585870 | 25586121 |
| chr12 | 25609188 | 25609349 |
| chr12 | 25613555 | 25613779 |
| chr12 | 25617609 | 25617777 |
| chr12 | 25627652 | 25627930 |
| chr12 | 25628005 | 25628305 |
| chr12 | 25628305 | 25628637 |
| chr12 | 25641959 | 25642349 |
| chr12 | 25648340 | 25648596 |
| chr12 | 25650074 | 25650289 |
| chr12 | 25657614 | 25657949 |
| chr12 | 25683784 | 25684147 |
| chr12 | 25742278 | 25742574 |
| chr12 | 25784365 | 25784646 |
| chr12 | 25785761 | 25786256 |
| chr12 | 25786256 | 25786567 |
| chr12 | 25792501 | 25793137 |

|       |          |          |
|-------|----------|----------|
| chr12 | 25805333 | 25805561 |
| chr12 | 25820095 | 25820257 |
| chr12 | 25851694 | 25851875 |
| chr12 | 25858479 | 25858718 |
| chr12 | 25858718 | 25858979 |
| chr12 | 25878214 | 25878377 |
| chr12 | 25886902 | 25887275 |
| chr12 | 25890844 | 25891028 |
| chr12 | 25924726 | 25924902 |
| chr12 | 25983317 | 25983993 |
| chr12 | 25984991 | 25985332 |
| chr12 | 25993628 | 25993812 |
| chr12 | 25993934 | 25994470 |
| chr12 | 25996745 | 25996938 |
| chr12 | 26071610 | 26071884 |
| chr12 | 26079016 | 26079211 |
| chr12 | 26079214 | 26079573 |
| chr12 | 26174855 | 26175012 |
| chr12 | 26191633 | 26191963 |
| chr12 | 26194147 | 26194305 |
| chr12 | 26206821 | 26207128 |
| chr12 | 26296170 | 26296360 |
| chr12 | 26315077 | 26315276 |
| chr12 | 26340732 | 26340934 |
| chr12 | 26365998 | 26366219 |
| chr12 | 26414615 | 26414827 |
| chr12 | 26414831 | 26415148 |
| chr12 | 26415148 | 26415470 |
| chr12 | 26454718 | 26455095 |
| chr12 | 26456267 | 26456712 |
| chr12 | 26468976 | 26469761 |
| chr12 | 26469788 | 26470136 |
| chr12 | 26533019 | 26533282 |
| chr12 | 26598595 | 26598821 |
| chr12 | 26955080 | 26955284 |
| chr12 | 27068457 | 27068632 |
| chr12 | 27164534 | 27164898 |
| chr12 | 27165744 | 27166074 |
| chr12 | 27200301 | 27200516 |
| chr12 | 27200549 | 27200739 |
| chr12 | 27318982 | 27319239 |
| chr12 | 27341395 | 27341800 |

|       |          |          |
|-------|----------|----------|
| chr12 | 27341800 | 27342144 |
| chr12 | 27342144 | 27342499 |
| chr12 | 27342522 | 27342932 |
| chr12 | 27342932 | 27343262 |
| chr12 | 27343320 | 27343549 |
| chr12 | 27374867 | 27375105 |
| chr12 | 27379956 | 27380168 |
| chr12 | 27386633 | 27387004 |
| chr12 | 27390342 | 27390852 |
| chr12 | 27392058 | 27392286 |
| chr12 | 27468094 | 27468498 |
| chr12 | 27479498 | 27479793 |
| chr12 | 27485538 | 27485716 |
| chr12 | 27485888 | 27486158 |
| chr12 | 27489839 | 27490216 |
| chr12 | 27490550 | 27490730 |
| chr12 | 27491521 | 27491730 |
| chr12 | 27491730 | 27491916 |
| chr12 | 27491916 | 27492077 |
| chr12 | 27492274 | 27492784 |
| chr12 | 27495481 | 27495693 |
| chr12 | 27503107 | 27503284 |
| chr12 | 27507574 | 27507901 |
| chr12 | 27507901 | 27508476 |
| chr12 | 27508520 | 27508797 |
| chr12 | 27521450 | 27521856 |
| chr12 | 27532643 | 27532922 |
| chr12 | 27533261 | 27533411 |
| chr12 | 27546895 | 27547120 |
| chr12 | 27547357 | 27547696 |
| chr12 | 27553007 | 27553232 |
| chr12 | 27586328 | 27586588 |
| chr12 | 27599249 | 27599399 |
| chr12 | 27604348 | 27604667 |
| chr12 | 27623106 | 27623305 |
| chr12 | 27724865 | 27725142 |
| chr12 | 27740177 | 27740493 |
| chr12 | 27759142 | 27759382 |
| chr12 | 27769059 | 27769252 |
| chr12 | 27780875 | 27781209 |
| chr12 | 27786164 | 27786623 |
| chr12 | 27786662 | 27786931 |



|       |          |          |
|-------|----------|----------|
| chr12 | 27796366 | 27796642 |
| chr12 | 27796642 | 27797160 |
| chr12 | 27821598 | 27821785 |
| chr12 | 27821792 | 27822031 |
| chr12 | 27826006 | 27826265 |
| chr12 | 27826265 | 27826678 |
| chr12 | 27827221 | 27827493 |
| chr12 | 27829410 | 27829642 |
| chr12 | 27839557 | 27839870 |
| chr12 | 27896699 | 27897018 |
| chr12 | 27906638 | 27906818 |
| chr12 | 27940582 | 27940752 |
| chr12 | 27977975 | 27978135 |
| chr12 | 27999158 | 27999508 |
| chr12 | 28055511 | 28055760 |
| chr12 | 28081941 | 28082150 |
| chr12 | 28171304 | 28171669 |
| chr12 | 28174185 | 28174472 |
| chr12 | 28235545 | 28235752 |
| chr12 | 28344759 | 28344936 |
| chr12 | 28432501 | 28432686 |
| chr12 | 28476884 | 28477340 |
| chr12 | 28501795 | 28502388 |
| chr12 | 28514417 | 28514760 |
| chr12 | 28531761 | 28532224 |
| chr12 | 28533337 | 28533575 |
| chr12 | 28533575 | 28533870 |
| chr12 | 28534350 | 28534500 |
| chr12 | 28554858 | 28555052 |
| chr12 | 28574008 | 28574244 |
| chr12 | 28574267 | 28574878 |
| chr12 | 28579218 | 28579368 |
| chr12 | 28588092 | 28588289 |
| chr12 | 28589203 | 28589364 |
| chr12 | 28589371 | 28589907 |
| chr12 | 28589924 | 28590074 |
| chr12 | 28598490 | 28598648 |
| chr12 | 28598783 | 28599057 |
| chr12 | 28602391 | 28602589 |
| chr12 | 28614583 | 28614878 |
| chr12 | 28621848 | 28622001 |
| chr12 | 28622253 | 28622450 |

|       |          |          |
|-------|----------|----------|
| chr12 | 28626262 | 28626662 |
| chr12 | 28626700 | 28626949 |
| chr12 | 28626949 | 28627506 |
| chr12 | 28628079 | 28628379 |
| chr12 | 28628487 | 28628685 |
| chr12 | 28635241 | 28635535 |
| chr12 | 28635535 | 28635786 |
| chr12 | 28635786 | 28636099 |
| chr12 | 28636099 | 28636370 |
| chr12 | 28638867 | 28639071 |
| chr12 | 28649260 | 28649809 |
| chr12 | 28649809 | 28650089 |
| chr12 | 28658169 | 28658461 |
| chr12 | 28667446 | 28667629 |
| chr12 | 28675014 | 28675628 |
| chr12 | 28675628 | 28676234 |
| chr12 | 28678404 | 28678574 |
| chr12 | 28689037 | 28689383 |
| chr12 | 28689389 | 28689561 |
| chr12 | 28691137 | 28691287 |
| chr12 | 28697793 | 28698202 |
| chr12 | 28698299 | 28698595 |
| chr12 | 28698595 | 28698846 |
| chr12 | 28699105 | 28699420 |
| chr12 | 28699737 | 28699963 |
| chr12 | 28706538 | 28706812 |
| chr12 | 28707239 | 28707438 |
| chr12 | 28715359 | 28715526 |
| chr12 | 28722969 | 28723381 |
| chr12 | 28727051 | 28727370 |
| chr12 | 28727370 | 28727621 |
| chr12 | 28727621 | 28727871 |
| chr12 | 28738341 | 28738822 |
| chr12 | 28739153 | 28739650 |
| chr12 | 28739650 | 28739938 |
| chr12 | 28749890 | 28750336 |
| chr12 | 28750336 | 28750652 |
| chr12 | 28751332 | 28751628 |
| chr12 | 28751628 | 28751913 |
| chr12 | 28751913 | 28752245 |
| chr12 | 28773902 | 28774129 |
| chr12 | 28784382 | 28784665 |

|       |          |          |
|-------|----------|----------|
| chr12 | 28804830 | 28805151 |
| chr12 | 28805151 | 28805647 |
| chr12 | 28829533 | 28830044 |
| chr12 | 28831099 | 28831456 |
| chr12 | 28848260 | 28848469 |
| chr12 | 28848640 | 28849200 |
| chr12 | 28867610 | 28867893 |
| chr12 | 28886939 | 28887435 |
| chr12 | 28898390 | 28898560 |
| chr12 | 28898684 | 28898857 |
| chr12 | 28899857 | 28900095 |
| chr12 | 28902233 | 28902420 |
| chr12 | 28902539 | 28902753 |
| chr12 | 28903079 | 28903335 |
| chr12 | 28906747 | 28906918 |
| chr12 | 28958879 | 28959059 |
| chr12 | 28975481 | 28975631 |
| chr12 | 29015286 | 29015854 |
| chr12 | 29018544 | 29018776 |
| chr12 | 29021214 | 29021573 |
| chr12 | 29022845 | 29023428 |
| chr12 | 29047901 | 29048251 |
| chr12 | 29048273 | 29048733 |
| chr12 | 29054390 | 29054735 |
| chr12 | 29068252 | 29068486 |
| chr12 | 29073440 | 29073736 |
| chr12 | 29073736 | 29074043 |
| chr12 | 29078998 | 29079307 |
| chr12 | 29099708 | 29100031 |
| chr12 | 29100031 | 29100571 |
| chr12 | 29108907 | 29109113 |
| chr12 | 29128693 | 29128917 |
| chr12 | 29128917 | 29129165 |
| chr12 | 29139126 | 29139317 |
| chr12 | 29157352 | 29157582 |
| chr12 | 29162365 | 29162793 |
| chr12 | 29175812 | 29176014 |
| chr12 | 29178229 | 29178553 |
| chr12 | 29191288 | 29191438 |
| chr12 | 29213707 | 29213943 |
| chr12 | 29242136 | 29242341 |
| chr12 | 29282657 | 29282807 |

|       |          |          |
|-------|----------|----------|
| chr12 | 29290721 | 29291455 |
| chr12 | 29358693 | 29359019 |
| chr12 | 29465303 | 29465503 |
| chr12 | 29621860 | 29622057 |
| chr12 | 29676026 | 29676231 |
| chr12 | 29691230 | 29691438 |
| chr12 | 29691563 | 29691851 |
| chr12 | 29749130 | 29749483 |
| chr12 | 29749483 | 29749960 |
| chr12 | 29778996 | 29779161 |
| chr12 | 29795143 | 29795357 |
| chr12 | 29814383 | 29814548 |
| chr12 | 29837568 | 29837783 |
| chr12 | 29855102 | 29855344 |
| chr12 | 29872526 | 29872730 |
| chr12 | 29878627 | 29878838 |
| chr12 | 29881756 | 29881975 |
| chr12 | 29882941 | 29883192 |
| chr12 | 29883284 | 29883573 |
| chr12 | 29894348 | 29894616 |
| chr12 | 29894727 | 29895001 |
| chr12 | 29895719 | 29896434 |
| chr12 | 29905243 | 29905559 |
| chr12 | 29906921 | 29907073 |
| chr12 | 29907076 | 29907450 |
| chr12 | 29907450 | 29907833 |
| chr12 | 29919878 | 29920230 |
| chr12 | 29921578 | 29921824 |
| chr12 | 29926952 | 29927283 |
| chr12 | 29932955 | 29933339 |
| chr12 | 29933464 | 29933806 |
| chr12 | 29933806 | 29934220 |
| chr12 | 29934335 | 29934682 |
| chr12 | 29937802 | 29938126 |
| chr12 | 29938126 | 29938398 |
| chr12 | 29938398 | 29938667 |
| chr12 | 29938667 | 29939061 |
| chr12 | 29954096 | 29954283 |
| chr12 | 29961447 | 29961772 |
| chr12 | 29961780 | 29961937 |
| chr12 | 29964943 | 29965511 |
| chr12 | 29965577 | 29965759 |

|       |          |          |
|-------|----------|----------|
| chr12 | 29992332 | 29992482 |
| chr12 | 29998963 | 29999269 |
| chr12 | 29999391 | 29999681 |
| chr12 | 30003444 | 30004054 |
| chr12 | 30006422 | 30006787 |
| chr12 | 30016239 | 30016472 |
| chr12 | 30020496 | 30020781 |
| chr12 | 30023139 | 30023289 |
| chr12 | 30023611 | 30023763 |
| chr12 | 30024450 | 30024768 |
| chr12 | 30031966 | 30032237 |
| chr12 | 30032709 | 30033247 |
| chr12 | 30033355 | 30033550 |
| chr12 | 30036670 | 30036830 |
| chr12 | 30037603 | 30037901 |
| chr12 | 30039420 | 30039824 |
| chr12 | 30039824 | 30040014 |
| chr12 | 30040057 | 30040232 |
| chr12 | 30040262 | 30040528 |
| chr12 | 30050014 | 30050192 |
| chr12 | 30050285 | 30050525 |
| chr12 | 30055246 | 30055454 |
| chr12 | 30062199 | 30062525 |
| chr12 | 30071110 | 30071440 |
| chr12 | 30102995 | 30103164 |
| chr12 | 30112274 | 30112431 |
| chr12 | 30128633 | 30128889 |
| chr12 | 30142188 | 30142341 |
| chr12 | 30369897 | 30370122 |
| chr12 | 30373212 | 30373578 |
| chr12 | 30504978 | 30505135 |
| chr12 | 30578101 | 30578470 |
| chr12 | 30578470 | 30578836 |
| chr12 | 30578836 | 30579133 |
| chr12 | 30583882 | 30584070 |
| chr12 | 30584117 | 30584579 |
| chr12 | 30584579 | 30584969 |
| chr12 | 30584973 | 30585182 |
| chr12 | 30597050 | 30597306 |
| chr12 | 30618385 | 30618558 |
| chr12 | 30635134 | 30635527 |
| chr12 | 30635547 | 30636082 |

|       |          |          |
|-------|----------|----------|
| chr12 | 30647165 | 30647335 |
| chr12 | 30651274 | 30651466 |
| chr12 | 30660400 | 30660563 |
| chr12 | 30663996 | 30664258 |
| chr12 | 30767630 | 30767942 |
| chr12 | 30846715 | 30847203 |
| chr12 | 30850831 | 30851162 |
| chr12 | 30865623 | 30865878 |
| chr12 | 30865878 | 30866216 |
| chr12 | 30868525 | 30868760 |
| chr12 | 30868841 | 30869087 |
| chr12 | 30884057 | 30884610 |
| chr12 | 30884700 | 30884900 |
| chr12 | 30890127 | 30890379 |
| chr12 | 30910838 | 30911096 |
| chr12 | 30911166 | 30911529 |
| chr12 | 30911529 | 30911935 |
| chr12 | 30911935 | 30912373 |
| chr12 | 30922437 | 30922768 |
| chr12 | 30933398 | 30933582 |
| chr12 | 30943350 | 30943553 |
| chr12 | 31001939 | 31002091 |
| chr12 | 31003861 | 31004141 |
| chr12 | 31005086 | 31005356 |
| chr12 | 31006785 | 31007016 |
| chr12 | 31008223 | 31008550 |
| chr12 | 31011976 | 31012141 |
| chr12 | 31056353 | 31056951 |
| chr12 | 31057049 | 31057483 |
| chr12 | 31059354 | 31059968 |
| chr12 | 31060271 | 31060474 |
| chr12 | 31061784 | 31061995 |
| chr12 | 31062089 | 31062256 |
| chr12 | 31066206 | 31066467 |
| chr12 | 31066467 | 31066726 |
| chr12 | 31066958 | 31067118 |
| chr12 | 31067361 | 31067578 |
| chr12 | 31073518 | 31074229 |
| chr12 | 31074229 | 31074736 |
| chr12 | 31074736 | 31075201 |
| chr12 | 31075230 | 31075524 |
| chr12 | 31083377 | 31083851 |

|       |          |          |
|-------|----------|----------|
| chr12 | 31083851 | 31084361 |
| chr12 | 31090450 | 31090691 |
| chr12 | 31097226 | 31097599 |
| chr12 | 31104319 | 31104469 |
| chr12 | 31115827 | 31116160 |
| chr12 | 31116160 | 31116427 |
| chr12 | 31128901 | 31129171 |
| chr12 | 31132272 | 31132486 |
| chr12 | 31145093 | 31145349 |
| chr12 | 31145349 | 31145799 |
| chr12 | 31149954 | 31150237 |
| chr12 | 31159058 | 31159221 |
| chr12 | 31170780 | 31171068 |
| chr12 | 31185148 | 31185553 |
| chr12 | 31186475 | 31186774 |
| chr12 | 31186774 | 31187090 |
| chr12 | 31194654 | 31194827 |
| chr12 | 31236858 | 31237034 |
| chr12 | 31237318 | 31237478 |
| chr12 | 31239278 | 31239474 |
| chr12 | 31258595 | 31258824 |
| chr12 | 31264680 | 31265092 |
| chr12 | 31265092 | 31265384 |
| chr12 | 31265384 | 31265678 |
| chr12 | 31265678 | 31265918 |
| chr12 | 31266047 | 31266383 |
| chr12 | 31270889 | 31271152 |
| chr12 | 31271152 | 31271432 |
| chr12 | 31271432 | 31271764 |
| chr12 | 31271764 | 31272075 |
| chr12 | 31272328 | 31272613 |
| chr12 | 31278441 | 31278633 |
| chr12 | 31292155 | 31292413 |
| chr12 | 31292413 | 31292740 |
| chr12 | 31292804 | 31292984 |
| chr12 | 31294504 | 31294951 |
| chr12 | 31302853 | 31303243 |
| chr12 | 31303243 | 31303506 |
| chr12 | 31333125 | 31333291 |
| chr12 | 31350336 | 31350510 |
| chr12 | 31350844 | 31351288 |
| chr12 | 31351288 | 31351630 |

|       |          |          |
|-------|----------|----------|
| chr12 | 31370224 | 31370519 |
| chr12 | 31374636 | 31374989 |
| chr12 | 31376389 | 31376623 |
| chr12 | 31415894 | 31416342 |
| chr12 | 31444142 | 31444548 |
| chr12 | 31444808 | 31445004 |
| chr12 | 31453869 | 31454062 |
| chr12 | 31460351 | 31460503 |
| chr12 | 31499037 | 31499198 |
| chr12 | 31499254 | 31499478 |
| chr12 | 31499478 | 31499755 |
| chr12 | 31499755 | 31500265 |
| chr12 | 31505556 | 31505712 |
| chr12 | 31507269 | 31507481 |
| chr12 | 31508072 | 31508222 |
| chr12 | 31508503 | 31508862 |
| chr12 | 31513783 | 31514098 |
| chr12 | 31514098 | 31514345 |
| chr12 | 31519925 | 31520146 |
| chr12 | 31554789 | 31555014 |
| chr12 | 31558964 | 31559409 |
| chr12 | 31559409 | 31559953 |
| chr12 | 31563960 | 31564313 |
| chr12 | 31567564 | 31567947 |
| chr12 | 31571695 | 31571853 |
| chr12 | 31573833 | 31574071 |
| chr12 | 31574486 | 31574901 |
| chr12 | 31574964 | 31575192 |
| chr12 | 31578177 | 31578342 |
| chr12 | 31581108 | 31581313 |
| chr12 | 31582177 | 31582669 |
| chr12 | 31583798 | 31584159 |
| chr12 | 31587340 | 31587545 |
| chr12 | 31591064 | 31591232 |
| chr12 | 31591417 | 31591713 |
| chr12 | 31591843 | 31592053 |
| chr12 | 31592087 | 31592334 |
| chr12 | 31605873 | 31606085 |
| chr12 | 31606085 | 31606377 |
| chr12 | 31633980 | 31634286 |
| chr12 | 31634302 | 31634837 |
| chr12 | 31634837 | 31635245 |



|       |          |          |
|-------|----------|----------|
| chr12 | 31653725 | 31653923 |
| chr12 | 31654305 | 31654465 |
| chr12 | 31654469 | 31654718 |
| chr12 | 31654718 | 31654964 |
| chr12 | 31654964 | 31655204 |
| chr12 | 31655204 | 31655430 |
| chr12 | 31691826 | 31691982 |
| chr12 | 31695416 | 31695587 |
| chr12 | 31695587 | 31695742 |
| chr12 | 31726787 | 31726978 |
| chr12 | 31818125 | 31818363 |
| chr12 | 31838368 | 31838897 |
| chr12 | 31848965 | 31849421 |
| chr12 | 31849485 | 31849975 |
| chr12 | 31851175 | 31851325 |
| chr12 | 31858559 | 31858735 |
| chr12 | 31871786 | 31872000 |
| chr12 | 31872000 | 31872216 |
| chr12 | 31882728 | 31883065 |
| chr12 | 31895959 | 31896243 |
| chr12 | 31902593 | 31902892 |
| chr12 | 31913594 | 31913986 |
| chr12 | 31914819 | 31915186 |
| chr12 | 31926620 | 31927079 |
| chr12 | 31929763 | 31929914 |
| chr12 | 31949191 | 31949678 |
| chr12 | 31949678 | 31950090 |
| chr12 | 31950090 | 31950451 |
| chr12 | 31950451 | 31951021 |
| chr12 | 31967612 | 31967899 |
| chr12 | 31969240 | 31969390 |
| chr12 | 31969900 | 31970313 |
| chr12 | 31973476 | 31974053 |
| chr12 | 31996731 | 31997299 |
| chr12 | 31997384 | 31997574 |
| chr12 | 32001617 | 32001847 |
| chr12 | 32009174 | 32009610 |
| chr12 | 32009610 | 32010192 |
| chr12 | 32015330 | 32015792 |
| chr12 | 32017547 | 32017963 |
| chr12 | 32018111 | 32018311 |
| chr12 | 32018421 | 32018700 |

|       |          |          |
|-------|----------|----------|
| chr12 | 32022513 | 32022761 |
| chr12 | 32044575 | 32044730 |
| chr12 | 32057544 | 32057792 |
| chr12 | 32060651 | 32061145 |
| chr12 | 32061145 | 32061710 |
| chr12 | 32091144 | 32091294 |
| chr12 | 32094559 | 32094715 |
| chr12 | 32095061 | 32095499 |
| chr12 | 32095518 | 32095678 |
| chr12 | 32099678 | 32099923 |
| chr12 | 32099923 | 32100166 |
| chr12 | 32114561 | 32114740 |
| chr12 | 32137622 | 32137837 |
| chr12 | 32144446 | 32144877 |
| chr12 | 32144877 | 32145133 |
| chr12 | 32163765 | 32164049 |
| chr12 | 32227680 | 32227840 |
| chr12 | 32228766 | 32229017 |
| chr12 | 32234244 | 32234502 |
| chr12 | 32241305 | 32241656 |
| chr12 | 32241656 | 32242050 |
| chr12 | 32242214 | 32242383 |
| chr12 | 32242846 | 32243402 |
| chr12 | 32243402 | 32244036 |
| chr12 | 32280024 | 32280186 |
| chr12 | 32290943 | 32291340 |
| chr12 | 32291340 | 32291589 |
| chr12 | 32291960 | 32292379 |
| chr12 | 32292920 | 32293081 |
| chr12 | 32297486 | 32297772 |
| chr12 | 32299552 | 32300140 |
| chr12 | 32300161 | 32300349 |
| chr12 | 32303564 | 32303715 |
| chr12 | 32306424 | 32306777 |
| chr12 | 32336827 | 32337247 |
| chr12 | 32342076 | 32342301 |
| chr12 | 32343531 | 32343860 |
| chr12 | 32343860 | 32344106 |
| chr12 | 32344184 | 32344530 |
| chr12 | 32351090 | 32351333 |
| chr12 | 32351733 | 32352319 |
| chr12 | 32366684 | 32367009 |

|       |          |          |
|-------|----------|----------|
| chr12 | 32367036 | 32367265 |
| chr12 | 32378457 | 32378757 |
| chr12 | 32378757 | 32378981 |
| chr12 | 32378981 | 32379324 |
| chr12 | 32379324 | 32379958 |
| chr12 | 32397812 | 32397962 |
| chr12 | 32409071 | 32409299 |
| chr12 | 32427607 | 32427875 |
| chr12 | 32427875 | 32428348 |
| chr12 | 32434600 | 32434962 |
| chr12 | 32434962 | 32435224 |
| chr12 | 32435224 | 32435459 |
| chr12 | 32442146 | 32442357 |
| chr12 | 32451172 | 32451593 |
| chr12 | 32460319 | 32460569 |
| chr12 | 32465138 | 32465289 |
| chr12 | 32465306 | 32465986 |
| chr12 | 32488327 | 32488644 |
| chr12 | 32533580 | 32533987 |
| chr12 | 32546436 | 32546754 |
| chr12 | 32546754 | 32547063 |
| chr12 | 32555561 | 32555859 |
| chr12 | 32560818 | 32561171 |
| chr12 | 32579048 | 32579604 |
| chr12 | 32586041 | 32586219 |
| chr12 | 32586219 | 32586557 |
| chr12 | 32586619 | 32586945 |
| chr12 | 32617066 | 32617292 |
| chr12 | 32617292 | 32617503 |
| chr12 | 32621710 | 32621860 |
| chr12 | 32624173 | 32624345 |
| chr12 | 32724512 | 32724753 |
| chr12 | 32729485 | 32729705 |
| chr12 | 32745812 | 32746068 |
| chr12 | 32819820 | 32820232 |
| chr12 | 32820232 | 32820591 |
| chr12 | 32820591 | 32820904 |
| chr12 | 32820904 | 32821164 |
| chr12 | 32827035 | 32827306 |
| chr12 | 32848084 | 32848602 |
| chr12 | 32854894 | 32855151 |
| chr12 | 32895813 | 32896125 |

|       |          |          |
|-------|----------|----------|
| chr12 | 32897520 | 32897807 |
| chr12 | 32897807 | 32897992 |
| chr12 | 32910115 | 32910482 |
| chr12 | 32910571 | 32910842 |
| chr12 | 32910915 | 32911176 |
| chr12 | 32920243 | 32920463 |
| chr12 | 32921597 | 32921914 |
| chr12 | 32921914 | 32922205 |
| chr12 | 32923064 | 32923262 |
| chr12 | 32923520 | 32923705 |
| chr12 | 32924359 | 32924534 |
| chr12 | 32929909 | 32930065 |
| chr12 | 32952601 | 32952757 |
| chr12 | 32953504 | 32953836 |
| chr12 | 32953836 | 32954257 |
| chr12 | 32954257 | 32954751 |
| chr12 | 32965424 | 32965629 |
| chr12 | 32975609 | 32975778 |
| chr12 | 32984856 | 32985439 |
| chr12 | 32989705 | 32990055 |
| chr12 | 32990055 | 32990309 |
| chr12 | 32994731 | 32995602 |
| chr12 | 33000322 | 33000788 |
| chr12 | 33000810 | 33000960 |
| chr12 | 33008305 | 33008911 |
| chr12 | 33008911 | 33009140 |
| chr12 | 33009722 | 33009911 |
| chr12 | 33009911 | 33010120 |
| chr12 | 33010120 | 33010377 |
| chr12 | 33014990 | 33015372 |
| chr12 | 33019853 | 33020096 |
| chr12 | 33020096 | 33020401 |
| chr12 | 33020401 | 33020832 |
| chr12 | 33021270 | 33021536 |
| chr12 | 33027040 | 33027543 |
| chr12 | 33027641 | 33027814 |
| chr12 | 33028395 | 33028611 |
| chr12 | 33036270 | 33036457 |
| chr12 | 33040512 | 33040662 |
| chr12 | 33040685 | 33041169 |
| chr12 | 33048448 | 33048623 |
| chr12 | 33057409 | 33057559 |

|       |          |          |
|-------|----------|----------|
| chr12 | 33061550 | 33061767 |
| chr12 | 33074184 | 33074362 |
| chr12 | 33075244 | 33075440 |
| chr12 | 33078980 | 33079164 |
| chr12 | 33083458 | 33083608 |
| chr12 | 33084111 | 33084289 |
| chr12 | 33084748 | 33084998 |
| chr12 | 33100528 | 33100898 |
| chr12 | 33101751 | 33101965 |
| chr12 | 33101965 | 33102183 |
| chr12 | 33102258 | 33102631 |
| chr12 | 33102631 | 33102906 |
| chr12 | 33103557 | 33103724 |
| chr12 | 33109279 | 33109508 |
| chr12 | 33109578 | 33109905 |
| chr12 | 33129536 | 33129760 |
| chr12 | 33140450 | 33140630 |
| chr12 | 33144921 | 33145085 |
| chr12 | 33146784 | 33147133 |
| chr12 | 33147133 | 33147496 |
| chr12 | 33147496 | 33147826 |
| chr12 | 33147826 | 33148141 |
| chr12 | 33154869 | 33155050 |
| chr12 | 33157132 | 33157316 |
| chr12 | 33158035 | 33158697 |
| chr12 | 33159421 | 33159683 |
| chr12 | 33160492 | 33160803 |
| chr12 | 33169886 | 33170222 |
| chr12 | 33170821 | 33171310 |
| chr12 | 33173713 | 33174072 |
| chr12 | 33174288 | 33174480 |
| chr12 | 33174588 | 33175072 |
| chr12 | 33175072 | 33175365 |
| chr12 | 33175961 | 33176312 |
| chr12 | 33180524 | 33180696 |
| chr12 | 33181269 | 33181469 |
| chr12 | 33181732 | 33182328 |
| chr12 | 33182328 | 33182804 |
| chr12 | 33182998 | 33183163 |
| chr12 | 33190222 | 33190432 |
| chr12 | 33193399 | 33193952 |
| chr12 | 33201640 | 33202311 |

|       |          |          |
|-------|----------|----------|
| chr12 | 33202434 | 33203042 |
| chr12 | 33217043 | 33217301 |
| chr12 | 33217301 | 33217580 |
| chr12 | 33217685 | 33217900 |
| chr12 | 33220479 | 33220702 |
| chr12 | 33220702 | 33220888 |
| chr12 | 33222290 | 33222536 |
| chr12 | 33222592 | 33222770 |
| chr12 | 33235027 | 33235227 |
| chr12 | 33235300 | 33235639 |
| chr12 | 33235694 | 33236159 |
| chr12 | 33245461 | 33245857 |
| chr12 | 33263270 | 33263482 |
| chr12 | 33269600 | 33269832 |
| chr12 | 33269832 | 33270069 |
| chr12 | 33279780 | 33279959 |
| chr12 | 33285305 | 33285766 |
| chr12 | 33285766 | 33286327 |
| chr12 | 33290138 | 33290550 |
| chr12 | 33302069 | 33302560 |
| chr12 | 33302786 | 33303096 |
| chr12 | 33303096 | 33303319 |
| chr12 | 33310806 | 33311183 |
| chr12 | 33333301 | 33333742 |
| chr12 | 33333779 | 33333983 |
| chr12 | 33333983 | 33334446 |
| chr12 | 33334595 | 33334831 |
| chr12 | 33344121 | 33344309 |
| chr12 | 33359962 | 33360255 |
| chr12 | 33368929 | 33369135 |
| chr12 | 33369592 | 33369867 |
| chr12 | 33371675 | 33372250 |
| chr12 | 33379742 | 33379919 |
| chr12 | 33379934 | 33380456 |
| chr12 | 33387555 | 33387776 |
| chr12 | 33388698 | 33388848 |
| chr12 | 33388874 | 33389182 |
| chr12 | 33391224 | 33391469 |
| chr12 | 33394832 | 33395207 |
| chr12 | 33395214 | 33395504 |
| chr12 | 33407679 | 33408078 |
| chr12 | 33408078 | 33408388 |

|       |          |          |
|-------|----------|----------|
| chr12 | 33408388 | 33408626 |
| chr12 | 33408626 | 33408922 |
| chr12 | 33408922 | 33409240 |
| chr12 | 33409272 | 33409484 |
| chr12 | 33409484 | 33409734 |
| chr12 | 33409734 | 33410116 |
| chr12 | 33424436 | 33424631 |
| chr12 | 33429353 | 33429740 |
| chr12 | 33429740 | 33429955 |
| chr12 | 33429955 | 33430230 |
| chr12 | 33434895 | 33435050 |
| chr12 | 33455557 | 33455801 |
| chr12 | 33638035 | 33638286 |
| chr12 | 33823780 | 33823963 |
| chr12 | 33864565 | 33864725 |
| chr12 | 33875499 | 33875661 |
| chr12 | 33898874 | 33899050 |
| chr12 | 33956931 | 33957159 |
| chr12 | 33957159 | 33957339 |
| chr12 | 33957339 | 33957541 |
| chr12 | 33957541 | 33957810 |
| chr12 | 33957810 | 33958249 |
| chr12 | 33958249 | 33958670 |
| chr12 | 33958670 | 33958908 |
| chr12 | 33967511 | 33967693 |
| chr12 | 33967693 | 33967874 |
| chr12 | 33968150 | 33968356 |
| chr12 | 34040096 | 34040533 |
| chr12 | 34040628 | 34040921 |
| chr12 | 34040921 | 34041365 |
| chr12 | 34048633 | 34048785 |
| chr12 | 34075614 | 34076172 |
| chr12 | 34076172 | 34076463 |
| chr12 | 34087239 | 34087577 |
| chr12 | 34087577 | 34087962 |
| chr12 | 34091853 | 34092118 |
| chr12 | 34144320 | 34144609 |
| chr12 | 34144617 | 34144793 |
| chr12 | 34209140 | 34209290 |
| chr12 | 34224221 | 34224378 |
| chr12 | 34224556 | 34224833 |
| chr12 | 34225512 | 34225667 |

|       |          |          |
|-------|----------|----------|
| chr12 | 34225710 | 34226077 |
| chr12 | 34226889 | 34227102 |
| chr12 | 34273959 | 34274131 |
| chr12 | 34326496 | 34326972 |
| chr12 | 34337100 | 34337371 |
| chr12 | 34337380 | 34337798 |
| chr12 | 34348307 | 34348476 |
| chr12 | 34372871 | 34373117 |
| chr12 | 34432551 | 34432778 |
| chr12 | 34469401 | 34469676 |
| chr12 | 34521565 | 34521715 |
| chr12 | 34553870 | 34554092 |
| chr12 | 34579311 | 34579500 |
| chr12 | 34612576 | 34612813 |
| chr12 | 34664901 | 34665069 |
| chr12 | 34674336 | 34674517 |
| chr12 | 34752194 | 34752409 |
| chr12 | 34852007 | 34852157 |
| chr12 | 34901571 | 34901843 |
| chr12 | 34906910 | 34907493 |
| chr12 | 34990223 | 34990625 |
| chr12 | 34990625 | 34990957 |
| chr12 | 34991232 | 34991533 |
| chr12 | 34991934 | 34992381 |
| chr12 | 35046647 | 35046971 |
| chr12 | 35046971 | 35047369 |
| chr12 | 35047369 | 35047698 |
| chr12 | 35047698 | 35047992 |
| chr12 | 35055182 | 35055410 |
| chr12 | 35064829 | 35065135 |
| chr12 | 35066549 | 35066862 |
| chr12 | 35067660 | 35068005 |
| chr12 | 35072863 | 35073013 |
| chr12 | 35123497 | 35123857 |
| chr12 | 35154265 | 35154532 |
| chr12 | 35158103 | 35158440 |
| chr12 | 35182727 | 35183009 |
| chr12 | 35192261 | 35192411 |
| chr12 | 35192513 | 35192718 |
| chr12 | 35192937 | 35193349 |
| chr12 | 35193349 | 35194044 |
| chr12 | 35199503 | 35199668 |



|       |          |          |
|-------|----------|----------|
| chr12 | 35204979 | 35205193 |
| chr12 | 35209212 | 35209870 |
| chr12 | 35216060 | 35216323 |
| chr12 | 35217768 | 35218048 |
| chr12 | 35220024 | 35220421 |
| chr12 | 35220421 | 35220780 |
| chr12 | 35224461 | 35224790 |
| chr12 | 35228697 | 35229047 |
| chr12 | 35244362 | 35244554 |
| chr12 | 35246179 | 35246678 |
| chr12 | 35246678 | 35246983 |
| chr12 | 35247226 | 35247502 |
| chr12 | 35283935 | 35284119 |
| chr12 | 35286759 | 35287043 |
| chr12 | 35287043 | 35287277 |
| chr12 | 35291617 | 35291844 |
| chr12 | 35291844 | 35292278 |
| chr12 | 35294536 | 35294831 |
| chr12 | 35294831 | 35295095 |
| chr12 | 35331567 | 35331837 |
| chr12 | 35333522 | 35334021 |
| chr12 | 35337045 | 35337394 |
| chr12 | 35338408 | 35338929 |
| chr12 | 35339190 | 35339395 |
| chr12 | 35376460 | 35376641 |
| chr12 | 35376641 | 35376823 |
| chr12 | 35397661 | 35397845 |
| chr12 | 35418790 | 35419029 |
| chr12 | 35423785 | 35424129 |
| chr12 | 35459762 | 35460185 |
| chr12 | 35470943 | 35471244 |
| chr12 | 35473047 | 35473322 |
| chr12 | 35479881 | 35480149 |
| chr12 | 35493244 | 35493660 |
| chr12 | 35503676 | 35503886 |
| chr12 | 35506407 | 35506682 |
| chr12 | 35507063 | 35507330 |
| chr12 | 35515626 | 35515904 |
| chr12 | 35517279 | 35517479 |
| chr12 | 35517479 | 35517697 |
| chr12 | 35517697 | 35518067 |
| chr12 | 35518147 | 35518363 |

|       |          |          |
|-------|----------|----------|
| chr12 | 35518363 | 35518658 |
| chr12 | 35518658 | 35518851 |
| chr12 | 35520447 | 35520817 |
| chr12 | 35527530 | 35527908 |
| chr12 | 35534033 | 35534255 |
| chr12 | 35534255 | 35534509 |
| chr12 | 35534509 | 35534894 |
| chr12 | 35534894 | 35535372 |
| chr12 | 35538836 | 35539139 |
| chr12 | 35544526 | 35544830 |
| chr12 | 35546070 | 35546344 |
| chr12 | 35553180 | 35553399 |
| chr12 | 35562801 | 35563400 |
| chr12 | 35564596 | 35564896 |
| chr12 | 35573924 | 35574235 |
| chr12 | 35576219 | 35576422 |
| chr12 | 35578879 | 35579184 |
| chr12 | 35605472 | 35605698 |
| chr12 | 35607462 | 35608224 |
| chr12 | 35652351 | 35652649 |
| chr12 | 35656208 | 35656579 |
| chr12 | 35656579 | 35656939 |
| chr12 | 35667175 | 35667325 |
| chr12 | 35670977 | 35671229 |
| chr12 | 35671340 | 35671490 |
| chr12 | 35671868 | 35672067 |
| chr12 | 35672242 | 35672529 |
| chr12 | 35672529 | 35672757 |
| chr12 | 35672757 | 35673033 |
| chr12 | 35675586 | 35675799 |
| chr12 | 35677031 | 35677267 |
| chr12 | 35677267 | 35677608 |
| chr12 | 35685322 | 35685553 |
| chr12 | 35687744 | 35688032 |
| chr12 | 35694258 | 35694635 |
| chr12 | 35694832 | 35695156 |
| chr12 | 35700334 | 35700495 |
| chr12 | 35702625 | 35702942 |
| chr12 | 35712169 | 35712463 |
| chr12 | 35712519 | 35712847 |
| chr12 | 35712847 | 35713118 |
| chr12 | 35713204 | 35713469 |

|       |          |          |
|-------|----------|----------|
| chr12 | 35716700 | 35716850 |
| chr12 | 35717325 | 35717475 |
| chr12 | 35726999 | 35727249 |
| chr12 | 35733647 | 35733981 |
| chr12 | 35734374 | 35734813 |
| chr12 | 35735089 | 35735312 |
| chr12 | 35736323 | 35736555 |
| chr12 | 35736555 | 35736802 |
| chr12 | 35738029 | 35738254 |
| chr12 | 35741959 | 35742328 |
| chr12 | 35742616 | 35743080 |
| chr12 | 35751401 | 35751851 |
| chr12 | 35760495 | 35760778 |
| chr12 | 35764818 | 35765237 |
| chr12 | 35770564 | 35770944 |
| chr12 | 35824534 | 35824985 |
| chr12 | 35826829 | 35827022 |
| chr12 | 35827049 | 35827395 |
| chr12 | 35831234 | 35831632 |
| chr12 | 35832967 | 35833318 |
| chr12 | 35833318 | 35833650 |
| chr12 | 35833685 | 35833853 |
| chr12 | 35837017 | 35837392 |
| chr12 | 35843051 | 35843253 |
| chr12 | 35850162 | 35850383 |
| chr12 | 35853172 | 35853538 |
| chr12 | 35853773 | 35853991 |
| chr12 | 35884963 | 35885180 |
| chr12 | 35894414 | 35894589 |
| chr12 | 35934920 | 35935232 |
| chr12 | 35957315 | 35957480 |
| chr12 | 35981791 | 35982045 |
| chr12 | 35984823 | 35985109 |
| chr12 | 35995900 | 35996118 |
| chr12 | 35997734 | 35998096 |
| chr12 | 35999114 | 35999309 |
| chr12 | 36002320 | 36002610 |
| chr12 | 36036825 | 36036994 |
| chr12 | 36037070 | 36037230 |
| chr12 | 36041809 | 36042096 |
| chr12 | 36042096 | 36042407 |
| chr12 | 36042407 | 36042889 |

|       |          |          |
|-------|----------|----------|
| chr12 | 36064544 | 36064767 |
| chr12 | 36074328 | 36074906 |
| chr12 | 36081697 | 36081865 |
| chr12 | 36093345 | 36093557 |
| chr12 | 36119144 | 36119433 |
| chr12 | 36134192 | 36134455 |
| chr12 | 36145451 | 36145653 |
| chr12 | 36156258 | 36156976 |
| chr12 | 36156985 | 36157310 |
| chr12 | 36157332 | 36157588 |
| chr12 | 36157591 | 36157946 |
| chr12 | 36157946 | 36158232 |
| chr12 | 36178356 | 36178570 |
| chr12 | 36187229 | 36187394 |
| chr12 | 36205702 | 36205867 |
| chr12 | 36215221 | 36215378 |
| chr12 | 36231490 | 36231700 |
| chr12 | 36241250 | 36241430 |
| chr12 | 36317180 | 36317501 |
| chr12 | 36373721 | 36373948 |
| chr12 | 36381392 | 36381701 |
| chr12 | 36381701 | 36381999 |
| chr12 | 36381999 | 36382376 |
| chr12 | 36406083 | 36406251 |
| chr12 | 36577860 | 36578098 |
| chr12 | 36714115 | 36714292 |
| chr12 | 36722830 | 36723017 |
| chr12 | 36880022 | 36880304 |
| chr12 | 36976738 | 36977196 |
| chr12 | 36988322 | 36988770 |
| chr12 | 37005203 | 37005547 |
| chr12 | 37019075 | 37019700 |
| chr12 | 37072272 | 37072510 |
| chr12 | 37072510 | 37072739 |
| chr12 | 37072739 | 37072998 |
| chr12 | 37108951 | 37109342 |
| chr12 | 37142052 | 37142330 |
| chr12 | 37181407 | 37181589 |
| chr12 | 37183772 | 37183993 |
| chr12 | 37231191 | 37231356 |
| chr12 | 37233580 | 37233784 |
| chr12 | 37450868 | 37451051 |

|       |          |          |
|-------|----------|----------|
| chr12 | 37614832 | 37615111 |
| chr12 | 37769913 | 37770127 |
| chr12 | 38778277 | 38778458 |
| chr12 | 38778521 | 38778870 |
| chr12 | 38778870 | 38779227 |
| chr12 | 38779227 | 38779750 |
| chr12 | 38779874 | 38780036 |
| chr12 | 38780131 | 38780383 |
| chr12 | 38788512 | 38789015 |
| chr12 | 38843755 | 38844315 |
| chr12 | 38904641 | 38904803 |
| chr12 | 38928913 | 38929304 |
| chr12 | 38931101 | 38931301 |
| chr12 | 39457506 | 39457699 |
| chr12 | 39510013 | 39510285 |
| chr12 | 39572909 | 39573065 |
| chr12 | 39665514 | 39665770 |
| chr12 | 39695401 | 39695748 |
| chr12 | 39724210 | 39724671 |
| chr12 | 39725242 | 39725473 |
| chr12 | 39726273 | 39726572 |
| chr12 | 39761109 | 39761260 |
| chr12 | 39761353 | 39761652 |
| chr12 | 39761965 | 39762409 |
| chr12 | 39831601 | 39831815 |
| chr12 | 39858857 | 39859052 |
| chr12 | 39872344 | 39872631 |
| chr12 | 39894043 | 39894503 |
| chr12 | 39907660 | 39907820 |
| chr12 | 39912798 | 39913098 |
| chr12 | 39913098 | 39913554 |
| chr12 | 39919430 | 39919826 |
| chr12 | 39927206 | 39927400 |
| chr12 | 39930865 | 39931015 |
| chr12 | 39935025 | 39935186 |
| chr12 | 39935877 | 39936188 |
| chr12 | 39939053 | 39939353 |
| chr12 | 39950351 | 39950573 |
| chr12 | 39950573 | 39950769 |
| chr12 | 39956575 | 39956731 |
| chr12 | 39978207 | 39978506 |
| chr12 | 39979179 | 39979382 |

|       |          |          |
|-------|----------|----------|
| chr12 | 39990203 | 39990512 |
| chr12 | 40009851 | 40010281 |
| chr12 | 40023391 | 40023553 |
| chr12 | 40027371 | 40027780 |
| chr12 | 40029267 | 40029549 |
| chr12 | 40030164 | 40030403 |
| chr12 | 40037139 | 40037738 |
| chr12 | 40037738 | 40038074 |
| chr12 | 40038074 | 40038415 |
| chr12 | 40082524 | 40082784 |
| chr12 | 40090067 | 40090315 |
| chr12 | 40096564 | 40096714 |
| chr12 | 40125957 | 40126123 |
| chr12 | 40133453 | 40133996 |
| chr12 | 40133996 | 40134321 |
| chr12 | 40140720 | 40141105 |
| chr12 | 40159760 | 40159991 |
| chr12 | 40164685 | 40164965 |
| chr12 | 40177227 | 40177377 |
| chr12 | 40198118 | 40198268 |
| chr12 | 40198452 | 40198764 |
| chr12 | 40199495 | 40199754 |
| chr12 | 40199844 | 40200014 |
| chr12 | 40200017 | 40200513 |
| chr12 | 40200551 | 40200779 |
| chr12 | 40202406 | 40202594 |
| chr12 | 40205424 | 40205774 |
| chr12 | 40206646 | 40206890 |
| chr12 | 40210777 | 40211045 |
| chr12 | 40212666 | 40212949 |
| chr12 | 40222254 | 40222583 |
| chr12 | 40222583 | 40223051 |
| chr12 | 40223051 | 40223688 |
| chr12 | 40223886 | 40224090 |
| chr12 | 40229738 | 40230014 |
| chr12 | 40231163 | 40231388 |
| chr12 | 40233399 | 40233560 |
| chr12 | 40233802 | 40234136 |
| chr12 | 40239245 | 40239605 |
| chr12 | 40243746 | 40244241 |
| chr12 | 40247982 | 40248326 |
| chr12 | 40253144 | 40253641 |

|       |          |          |
|-------|----------|----------|
| chr12 | 40257300 | 40257530 |
| chr12 | 40263127 | 40263305 |
| chr12 | 40274694 | 40275302 |
| chr12 | 40285744 | 40286055 |
| chr12 | 40335412 | 40335562 |
| chr12 | 40341551 | 40341759 |
| chr12 | 40347861 | 40348019 |
| chr12 | 40348167 | 40348680 |
| chr12 | 40383719 | 40384093 |
| chr12 | 40434200 | 40434466 |
| chr12 | 40445269 | 40445592 |
| chr12 | 40445666 | 40446357 |
| chr12 | 40446357 | 40446960 |
| chr12 | 40458588 | 40458936 |
| chr12 | 40458936 | 40459363 |
| chr12 | 40459756 | 40459933 |
| chr12 | 40464279 | 40464547 |
| chr12 | 40470460 | 40470610 |
| chr12 | 40471523 | 40471683 |
| chr12 | 40471712 | 40471925 |
| chr12 | 40472060 | 40472417 |
| chr12 | 40472462 | 40472634 |
| chr12 | 40472733 | 40473123 |
| chr12 | 40473335 | 40473678 |
| chr12 | 40473678 | 40474006 |
| chr12 | 40480276 | 40480613 |
| chr12 | 40483508 | 40483740 |
| chr12 | 40486498 | 40486674 |
| chr12 | 40490498 | 40491107 |
| chr12 | 40491162 | 40491329 |
| chr12 | 40497821 | 40498065 |
| chr12 | 40499368 | 40499570 |
| chr12 | 40499611 | 40499906 |
| chr12 | 40499906 | 40500300 |
| chr12 | 40516279 | 40516601 |
| chr12 | 40532429 | 40532660 |
| chr12 | 40532660 | 40532882 |
| chr12 | 40532882 | 40533151 |
| chr12 | 40535749 | 40536026 |
| chr12 | 40536026 | 40536297 |
| chr12 | 40536297 | 40536589 |
| chr12 | 40551415 | 40551572 |

|       |          |          |
|-------|----------|----------|
| chr12 | 40558719 | 40558869 |
| chr12 | 40558886 | 40559549 |
| chr12 | 40562695 | 40562958 |
| chr12 | 40568982 | 40569621 |
| chr12 | 40574086 | 40574333 |
| chr12 | 40581146 | 40581296 |
| chr12 | 40582086 | 40582258 |
| chr12 | 40584531 | 40584955 |
| chr12 | 40584955 | 40585340 |
| chr12 | 40587961 | 40588203 |
| chr12 | 40626617 | 40626913 |
| chr12 | 40651536 | 40651811 |
| chr12 | 40678354 | 40678754 |
| chr12 | 40678769 | 40678943 |
| chr12 | 40680596 | 40680886 |
| chr12 | 40712335 | 40712553 |
| chr12 | 40750917 | 40751136 |
| chr12 | 40773194 | 40773386 |
| chr12 | 40795846 | 40796061 |
| chr12 | 40798129 | 40798480 |
| chr12 | 40823840 | 40824021 |
| chr12 | 40837702 | 40838059 |
| chr12 | 40842693 | 40842860 |
| chr12 | 40888081 | 40888860 |
| chr12 | 40888909 | 40889094 |
| chr12 | 40893643 | 40893802 |
| chr12 | 40897101 | 40897266 |
| chr12 | 40898777 | 40898938 |
| chr12 | 40899031 | 40899399 |
| chr12 | 40902750 | 40902995 |
| chr12 | 40903858 | 40904062 |
| chr12 | 40906936 | 40907162 |
| chr12 | 40908133 | 40908428 |
| chr12 | 40908693 | 40909153 |
| chr12 | 40909211 | 40909477 |
| chr12 | 40909491 | 40909676 |
| chr12 | 40917484 | 40917831 |
| chr12 | 41023783 | 41024146 |
| chr12 | 41024146 | 41024583 |
| chr12 | 41080317 | 41080510 |
| chr12 | 41081731 | 41082256 |
| chr12 | 41085790 | 41086188 |



|       |          |          |
|-------|----------|----------|
| chr12 | 41089948 | 41090370 |
| chr12 | 41097474 | 41097727 |
| chr12 | 41146805 | 41146959 |
| chr12 | 41171541 | 41171873 |
| chr12 | 41192363 | 41192548 |
| chr12 | 41192921 | 41193154 |
| chr12 | 41193154 | 41193403 |
| chr12 | 41349482 | 41349679 |
| chr12 | 41400498 | 41400662 |
| chr12 | 41401209 | 41401435 |
| chr12 | 41402081 | 41402337 |
| chr12 | 41445181 | 41445341 |
| chr12 | 41445462 | 41445931 |
| chr12 | 41485839 | 41486175 |
| chr12 | 41487107 | 41487272 |
| chr12 | 41515047 | 41515263 |
| chr12 | 41521758 | 41521938 |
| chr12 | 41552114 | 41552324 |
| chr12 | 41565680 | 41565957 |
| chr12 | 41655280 | 41655501 |
| chr12 | 41693858 | 41694009 |
| chr12 | 41695458 | 41695624 |
| chr12 | 41820105 | 41820608 |
| chr12 | 41879512 | 41879712 |
| chr12 | 41884060 | 41884231 |
| chr12 | 41896956 | 41897163 |
| chr12 | 41925140 | 41925399 |
| chr12 | 41927587 | 41927868 |
| chr12 | 41935456 | 41935909 |
| chr12 | 41948243 | 41948419 |
| chr12 | 41949495 | 41949793 |
| chr12 | 41949793 | 41950074 |
| chr12 | 41950074 | 41950364 |
| chr12 | 41952462 | 41952723 |
| chr12 | 41997432 | 41997676 |
| chr12 | 42121481 | 42121638 |
| chr12 | 42136038 | 42136409 |
| chr12 | 42136882 | 42137164 |
| chr12 | 42137316 | 42137591 |
| chr12 | 42795860 | 42796112 |
| chr12 | 42843456 | 42844083 |
| chr12 | 42891114 | 42891293 |

|       |          |          |
|-------|----------|----------|
| chr12 | 42891293 | 42891479 |
| chr12 | 42891482 | 42891841 |
| chr12 | 42892294 | 42892602 |
| chr12 | 42905797 | 42905961 |
| chr12 | 44143800 | 44144058 |
| chr12 | 44165264 | 44165424 |
| chr12 | 44181384 | 44181615 |
| chr12 | 44209453 | 44209925 |
| chr12 | 44209925 | 44210687 |
| chr12 | 44246674 | 44246945 |
| chr12 | 44248428 | 44249003 |
| chr12 | 44268592 | 44268968 |
| chr12 | 44268968 | 44269312 |
| chr12 | 44269312 | 44269631 |
| chr12 | 44269631 | 44269888 |
| chr12 | 44280210 | 44280459 |
| chr12 | 44292359 | 44292590 |
| chr12 | 44304158 | 44304316 |
| chr12 | 44328606 | 44328761 |
| chr12 | 44328785 | 44329043 |
| chr12 | 44329043 | 44329330 |
| chr12 | 44329330 | 44329647 |
| chr12 | 44329667 | 44330200 |
| chr12 | 44332090 | 44332444 |
| chr12 | 44344210 | 44344365 |
| chr12 | 44453832 | 44454136 |
| chr12 | 44524532 | 44524909 |
| chr12 | 44524909 | 44525177 |
| chr12 | 44525177 | 44525744 |
| chr12 | 44528482 | 44528711 |
| chr12 | 44528711 | 44528931 |
| chr12 | 44536236 | 44536569 |
| chr12 | 44588203 | 44588361 |
| chr12 | 44639584 | 44639946 |
| chr12 | 44640024 | 44640282 |
| chr12 | 44641838 | 44642311 |
| chr12 | 44642313 | 44642634 |
| chr12 | 44657808 | 44657983 |
| chr12 | 44660014 | 44660348 |
| chr12 | 44661386 | 44661694 |
| chr12 | 44710105 | 44710418 |
| chr12 | 44848584 | 44848805 |

|       |          |          |
|-------|----------|----------|
| chr12 | 44848805 | 44849015 |
| chr12 | 44849015 | 44849230 |
| chr12 | 44858049 | 44858497 |
| chr12 | 44858511 | 44859040 |
| chr12 | 44924686 | 44924896 |
| chr12 | 44930820 | 44931103 |
| chr12 | 44931103 | 44931321 |
| chr12 | 44935376 | 44935551 |
| chr12 | 44943198 | 44943573 |
| chr12 | 44969159 | 44969392 |
| chr12 | 44974305 | 44974466 |
| chr12 | 45003739 | 45003900 |
| chr12 | 45006089 | 45006254 |
| chr12 | 45006599 | 45006917 |
| chr12 | 45008576 | 45008726 |
| chr12 | 45010065 | 45010284 |
| chr12 | 45010284 | 45010583 |
| chr12 | 45029666 | 45030030 |
| chr12 | 45030040 | 45030240 |
| chr12 | 45031447 | 45031792 |
| chr12 | 45034025 | 45034208 |
| chr12 | 45034208 | 45034399 |
| chr12 | 45040615 | 45041030 |
| chr12 | 45046891 | 45047161 |
| chr12 | 45047161 | 45047604 |
| chr12 | 45059872 | 45060224 |
| chr12 | 45060224 | 45060565 |
| chr12 | 45060611 | 45061189 |
| chr12 | 45061249 | 45061614 |
| chr12 | 45067082 | 45067517 |
| chr12 | 45073778 | 45074007 |
| chr12 | 45074007 | 45074298 |
| chr12 | 45074298 | 45074668 |
| chr12 | 45074668 | 45074981 |
| chr12 | 45075034 | 45075350 |
| chr12 | 45080135 | 45080339 |
| chr12 | 45080424 | 45080737 |
| chr12 | 45080737 | 45081175 |
| chr12 | 45103069 | 45103315 |
| chr12 | 45132950 | 45133133 |
| chr12 | 45137740 | 45138345 |
| chr12 | 45161728 | 45161903 |

|       |          |          |
|-------|----------|----------|
| chr12 | 45162075 | 45162355 |
| chr12 | 45172011 | 45172276 |
| chr12 | 45183326 | 45183503 |
| chr12 | 45187240 | 45187448 |
| chr12 | 45319794 | 45320006 |
| chr12 | 45500380 | 45500765 |
| chr12 | 45519673 | 45519870 |
| chr12 | 45644220 | 45644640 |
| chr12 | 45657394 | 45657737 |
| chr12 | 45837462 | 45837739 |
| chr12 | 46707608 | 46707879 |
| chr12 | 46707879 | 46708158 |
| chr12 | 46708158 | 46708476 |
| chr12 | 46781559 | 46781770 |
| chr12 | 46818860 | 46819350 |
| chr12 | 46819350 | 46819884 |
| chr12 | 46931070 | 46931429 |
| chr12 | 46997235 | 46997514 |
| chr12 | 46997514 | 46997811 |
| chr12 | 47954134 | 47954886 |
| chr12 | 48020429 | 48020770 |
| chr12 | 48435567 | 48435781 |
| chr12 | 48446199 | 48446370 |
| chr12 | 48465378 | 48465729 |
| chr12 | 48496628 | 48496874 |
| chr12 | 48605404 | 48605614 |
| chr12 | 48654552 | 48654914 |
| chr12 | 48805997 | 48806231 |
| chr12 | 48900459 | 48900707 |
| chr12 | 49046046 | 49046278 |
| chr12 | 49046317 | 49046710 |
| chr12 | 49098966 | 49099130 |
| chr12 | 49099588 | 49099969 |
| chr12 | 49144229 | 49144495 |
| chr12 | 49148571 | 49148772 |
| chr12 | 49155242 | 49155444 |
| chr12 | 49170195 | 49170345 |
| chr12 | 49374601 | 49374758 |
| chr12 | 49374785 | 49375020 |
| chr12 | 49383269 | 49383594 |
| chr12 | 49383626 | 49384245 |
| chr12 | 49384264 | 49384501 |

|       |          |          |
|-------|----------|----------|
| chr12 | 49384501 | 49384722 |
| chr12 | 49384722 | 49384967 |
| chr12 | 49384967 | 49385253 |
| chr12 | 49385253 | 49385704 |
| chr12 | 49389740 | 49389929 |
| chr12 | 49390307 | 49390537 |
| chr12 | 49390996 | 49391161 |
| chr12 | 49391210 | 49391486 |
| chr12 | 49391486 | 49391755 |
| chr12 | 49391755 | 49392023 |
| chr12 | 49394864 | 49395091 |
| chr12 | 49398297 | 49398483 |
| chr12 | 49400617 | 49400783 |
| chr12 | 49400818 | 49401239 |
| chr12 | 49401239 | 49401534 |
| chr12 | 49401534 | 49401899 |
| chr12 | 49401987 | 49402139 |
| chr12 | 49408310 | 49408471 |
| chr12 | 49426199 | 49426617 |
| chr12 | 49472808 | 49473096 |
| chr12 | 49473352 | 49473644 |
| chr12 | 49475706 | 49475933 |
| chr12 | 49477020 | 49477381 |
| chr12 | 49477381 | 49477786 |
| chr12 | 49493447 | 49493831 |
| chr12 | 49502791 | 49503141 |
| chr12 | 49503141 | 49503467 |
| chr12 | 49512773 | 49513087 |
| chr12 | 49513087 | 49513584 |
| chr12 | 49534659 | 49534885 |
| chr12 | 49535269 | 49535524 |
| chr12 | 49739950 | 49740119 |
| chr12 | 49836531 | 49836727 |
| chr12 | 49887329 | 49887547 |
| chr12 | 49888654 | 49889144 |
| chr12 | 49889272 | 49889422 |
| chr12 | 49906752 | 49907012 |
| chr12 | 49932296 | 49932504 |
| chr12 | 49944999 | 49945149 |
| chr12 | 49951879 | 49952140 |
| chr12 | 49967897 | 49968421 |
| chr12 | 49968421 | 49968691 |

|       |          |          |
|-------|----------|----------|
| chr12 | 49969547 | 49969876 |
| chr12 | 49971214 | 49971429 |
| chr12 | 49975078 | 49975339 |
| chr12 | 50025827 | 50025986 |
| chr12 | 50038860 | 50039512 |
| chr12 | 50064636 | 50064836 |
| chr12 | 50064865 | 50065114 |
| chr12 | 50066006 | 50066312 |
| chr12 | 50066472 | 50066755 |
| chr12 | 50066759 | 50066936 |
| chr12 | 50073724 | 50074114 |
| chr12 | 50074172 | 50074378 |
| chr12 | 50172524 | 50172686 |
| chr12 | 50292965 | 50293125 |
| chr12 | 50301464 | 50301614 |
| chr12 | 50506591 | 50506857 |
| chr12 | 50514661 | 50514846 |
| chr12 | 50544354 | 50544656 |
| chr12 | 50544712 | 50544923 |
| chr12 | 50544923 | 50545204 |
| chr12 | 50549848 | 50550078 |
| chr12 | 50588447 | 50588812 |
| chr12 | 50588858 | 50589097 |
| chr12 | 50589097 | 50589291 |
| chr12 | 50598175 | 50598374 |
| chr12 | 50615607 | 50615826 |
| chr12 | 50615925 | 50616149 |
| chr12 | 50621101 | 50621283 |
| chr12 | 50624217 | 50624550 |
| chr12 | 50648240 | 50648467 |
| chr12 | 50648520 | 50648782 |
| chr12 | 50648782 | 50649132 |
| chr12 | 50649132 | 50649594 |
| chr12 | 50943707 | 50943958 |
| chr12 | 50999703 | 50999964 |
| chr12 | 51024119 | 51024304 |
| chr12 | 51024484 | 51024737 |
| chr12 | 51188325 | 51188530 |
| chr12 | 51196253 | 51196679 |
| chr12 | 51219279 | 51219550 |
| chr12 | 51241225 | 51241505 |
| chr12 | 51283765 | 51284019 |

|       |          |          |
|-------|----------|----------|
| chr12 | 51296080 | 51296470 |
| chr12 | 51308554 | 51308910 |
| chr12 | 51309897 | 51310127 |
| chr12 | 51346226 | 51346471 |
| chr12 | 51347888 | 51348671 |
| chr12 | 51353103 | 51353439 |
| chr12 | 51355354 | 51355622 |
| chr12 | 51368534 | 51368850 |
| chr12 | 51377257 | 51377878 |
| chr12 | 51402167 | 51402355 |
| chr12 | 51488517 | 51488669 |
| chr12 | 51489973 | 51490215 |
| chr12 | 51501428 | 51501793 |
| chr12 | 51563975 | 51564171 |
| chr12 | 51577860 | 51578173 |
| chr12 | 51578218 | 51578451 |
| chr12 | 51592014 | 51592229 |
| chr12 | 51592967 | 51593237 |
| chr12 | 51593237 | 51593444 |
| chr12 | 51593444 | 51593637 |
| chr12 | 51593637 | 51593896 |
| chr12 | 51593896 | 51594208 |
| chr12 | 51606228 | 51606379 |
| chr12 | 51641927 | 51642188 |
| chr12 | 51653342 | 51653523 |
| chr12 | 51653791 | 51653947 |
| chr12 | 51663983 | 51664149 |
| chr12 | 51664364 | 51664529 |
| chr12 | 51664835 | 51664992 |
| chr12 | 51666196 | 51666348 |
| chr12 | 51666789 | 51667129 |
| chr12 | 51667129 | 51667430 |
| chr12 | 51668142 | 51668327 |
| chr12 | 51673311 | 51673579 |
| chr12 | 51673579 | 51673912 |
| chr12 | 51678919 | 51679186 |
| chr12 | 51682043 | 51682211 |
| chr12 | 51682482 | 51682638 |
| chr12 | 51690905 | 51691098 |
| chr12 | 51691163 | 51691560 |
| chr12 | 51691560 | 51691858 |
| chr12 | 51691858 | 51692184 |

|       |          |          |
|-------|----------|----------|
| chr12 | 51692184 | 51692606 |
| chr12 | 51693578 | 51693728 |
| chr12 | 51694145 | 51694464 |
| chr12 | 51694513 | 51694708 |
| chr12 | 51699928 | 51700484 |
| chr12 | 51700484 | 51700817 |
| chr12 | 51703784 | 51704187 |
| chr12 | 51706713 | 51707178 |
| chr12 | 51711446 | 51711885 |
| chr12 | 51712732 | 51712969 |
| chr12 | 51721217 | 51721645 |
| chr12 | 51721670 | 51722298 |
| chr12 | 51722454 | 51722672 |
| chr12 | 51722672 | 51722859 |
| chr12 | 51734319 | 51734594 |
| chr12 | 51734594 | 51734901 |
| chr12 | 51734901 | 51735185 |
| chr12 | 51735195 | 51735355 |
| chr12 | 51735854 | 51736175 |
| chr12 | 51741019 | 51741181 |
| chr12 | 51741644 | 51742063 |
| chr12 | 51742088 | 51742257 |
| chr12 | 51747148 | 51747657 |
| chr12 | 51767556 | 51767731 |
| chr12 | 51772227 | 51772384 |
| chr12 | 51773276 | 51773482 |
| chr12 | 51784858 | 51785159 |
| chr12 | 51805671 | 51805893 |
| chr12 | 51811343 | 51811724 |
| chr12 | 51811724 | 51812021 |
| chr12 | 51819494 | 51819709 |
| chr12 | 51819767 | 51820075 |
| chr12 | 51821420 | 51821666 |
| chr12 | 51822942 | 51823189 |
| chr12 | 51825391 | 51825654 |
| chr12 | 51828660 | 51829068 |
| chr12 | 51829068 | 51829483 |
| chr12 | 51829483 | 51830140 |
| chr12 | 51838149 | 51838323 |
| chr12 | 51844797 | 51845327 |
| chr12 | 51847835 | 51848064 |
| chr12 | 51848064 | 51848339 |



|       |          |          |
|-------|----------|----------|
| chr12 | 51850371 | 51850792 |
| chr12 | 51864828 | 51865116 |
| chr12 | 51865116 | 51865387 |
| chr12 | 51865480 | 51865676 |
| chr12 | 51865762 | 51866335 |
| chr12 | 51866335 | 51866834 |
| chr12 | 51873773 | 51874091 |
| chr12 | 51875453 | 51875605 |
| chr12 | 51882610 | 51882945 |
| chr12 | 51883015 | 51883276 |
| chr12 | 51887608 | 51888164 |
| chr12 | 51888493 | 51889023 |
| chr12 | 51939874 | 51940039 |
| chr12 | 51940039 | 51940215 |
| chr12 | 51947349 | 51948020 |
| chr12 | 51952381 | 51952666 |
| chr12 | 51965042 | 51965338 |
| chr12 | 51970787 | 51971102 |
| chr12 | 51971102 | 51971701 |
| chr12 | 51977464 | 51977748 |
| chr12 | 51977839 | 51978170 |
| chr12 | 51985101 | 51985309 |
| chr12 | 51987262 | 51987443 |
| chr12 | 51988557 | 51988984 |
| chr12 | 52001510 | 52001896 |
| chr12 | 52005939 | 52006271 |
| chr12 | 52006271 | 52006679 |
| chr12 | 52006699 | 52006920 |
| chr12 | 52030034 | 52030244 |
| chr12 | 52030823 | 52031078 |
| chr12 | 52031078 | 52031395 |
| chr12 | 52038383 | 52038669 |
| chr12 | 52042899 | 52043094 |
| chr12 | 52097575 | 52098070 |
| chr12 | 52098432 | 52098582 |
| chr12 | 52119662 | 52120083 |
| chr12 | 52126428 | 52127035 |
| chr12 | 52142529 | 52142873 |
| chr12 | 52142873 | 52143221 |
| chr12 | 52152195 | 52152436 |
| chr12 | 52190066 | 52190322 |
| chr12 | 52228792 | 52229071 |

|       |          |          |
|-------|----------|----------|
| chr12 | 52229105 | 52229305 |
| chr12 | 52231154 | 52231333 |
| chr12 | 52284567 | 52284796 |
| chr12 | 52289276 | 52289441 |
| chr12 | 52289642 | 52289795 |
| chr12 | 52295895 | 52296105 |
| chr12 | 52298021 | 52298307 |
| chr12 | 52308710 | 52308877 |
| chr12 | 52337182 | 52337499 |
| chr12 | 52337591 | 52337793 |
| chr12 | 52338102 | 52338541 |
| chr12 | 52338541 | 52338881 |
| chr12 | 52348685 | 52348972 |
| chr12 | 52374105 | 52374307 |
| chr12 | 52376746 | 52377162 |
| chr12 | 52377162 | 52377558 |
| chr12 | 52382911 | 52383207 |
| chr12 | 52383304 | 52383454 |
| chr12 | 52394475 | 52394640 |
| chr12 | 52394640 | 52394869 |
| chr12 | 52396285 | 52396816 |
| chr12 | 52399947 | 52400508 |
| chr12 | 52402413 | 52402724 |
| chr12 | 52402777 | 52403163 |
| chr12 | 52408487 | 52408715 |
| chr12 | 52433891 | 52434424 |
| chr12 | 52437005 | 52437276 |
| chr12 | 52439167 | 52439729 |
| chr12 | 52439865 | 52440050 |
| chr12 | 52448004 | 52448625 |
| chr12 | 52475823 | 52476070 |
| chr12 | 52476141 | 52476357 |
| chr12 | 52478440 | 52479157 |
| chr12 | 52479379 | 52479681 |
| chr12 | 52493279 | 52493446 |
| chr12 | 52493446 | 52493622 |
| chr12 | 52497338 | 52497548 |
| chr12 | 52503168 | 52503500 |
| chr12 | 52503500 | 52503962 |
| chr12 | 52503962 | 52504380 |
| chr12 | 52504380 | 52504589 |
| chr12 | 52504589 | 52504787 |

|       |          |          |
|-------|----------|----------|
| chr12 | 52504787 | 52504971 |
| chr12 | 52505041 | 52505192 |
| chr12 | 52581359 | 52581692 |
| chr12 | 52602794 | 52603284 |
| chr12 | 52603284 | 52603662 |
| chr12 | 52603707 | 52603993 |
| chr12 | 52603993 | 52604245 |
| chr12 | 52604459 | 52604646 |
| chr12 | 52604779 | 52605036 |
| chr12 | 52618489 | 52618653 |
| chr12 | 52625485 | 52625810 |
| chr12 | 52628819 | 52629020 |
| chr12 | 52636159 | 52636505 |
| chr12 | 52636505 | 52636779 |
| chr12 | 52637972 | 52638139 |
| chr12 | 52643999 | 52644532 |
| chr12 | 52645037 | 52645187 |
| chr12 | 52665024 | 52665240 |
| chr12 | 52701998 | 52702339 |
| chr12 | 52702339 | 52702639 |
| chr12 | 52702639 | 52703002 |
| chr12 | 52730239 | 52730438 |
| chr12 | 52733839 | 52734291 |
| chr12 | 52735063 | 52735420 |
| chr12 | 52749885 | 52750448 |
| chr12 | 52781187 | 52781403 |
| chr12 | 52782777 | 52783445 |
| chr12 | 52785195 | 52785389 |
| chr12 | 52792359 | 52792733 |
| chr12 | 52802513 | 52802752 |
| chr12 | 52818638 | 52819026 |
| chr12 | 52819157 | 52819307 |
| chr12 | 52824816 | 52825088 |
| chr12 | 52832317 | 52832545 |
| chr12 | 52834993 | 52835166 |
| chr12 | 52835235 | 52835794 |
| chr12 | 52835856 | 52836017 |
| chr12 | 52836163 | 52836381 |
| chr12 | 52836381 | 52836617 |
| chr12 | 52847036 | 52847468 |
| chr12 | 52853620 | 52853794 |
| chr12 | 52858057 | 52858579 |

|       |          |          |
|-------|----------|----------|
| chr12 | 52893059 | 52893397 |
| chr12 | 52895744 | 52895972 |
| chr12 | 52896058 | 52896359 |
| chr12 | 52896359 | 52896683 |
| chr12 | 52907245 | 52907428 |
| chr12 | 52919004 | 52919242 |
| chr12 | 52928165 | 52928416 |
| chr12 | 52928416 | 52928727 |
| chr12 | 52928909 | 52929130 |
| chr12 | 52929196 | 52929604 |
| chr12 | 52929665 | 52929870 |
| chr12 | 52929996 | 52930361 |
| chr12 | 52930659 | 52930821 |
| chr12 | 52930964 | 52931135 |
| chr12 | 52932079 | 52932319 |
| chr12 | 52932319 | 52932471 |
| chr12 | 52950688 | 52951249 |
| chr12 | 53027393 | 53027710 |
| chr12 | 53027710 | 53028009 |
| chr12 | 53032792 | 53032993 |
| chr12 | 53042873 | 53043026 |
| chr12 | 53061409 | 53061762 |
| chr12 | 53146429 | 53146639 |
| chr12 | 53146639 | 53146897 |
| chr12 | 53177839 | 53178228 |
| chr12 | 53181591 | 53181805 |
| chr12 | 53248387 | 53248549 |
| chr12 | 53248588 | 53248798 |
| chr12 | 53251780 | 53252003 |
| chr12 | 53252003 | 53252122 |
| chr12 | 53252474 | 53252966 |
| chr12 | 53253195 | 53253347 |
| chr12 | 53253549 | 53253699 |
| chr12 | 53257762 | 53257941 |
| chr12 | 53294034 | 53294184 |
| chr12 | 53865743 | 53865993 |
| chr12 | 53888638 | 53889020 |
| chr12 | 53889336 | 53889518 |
| chr12 | 53896003 | 53896179 |
| chr12 | 53908789 | 53909038 |
| chr12 | 53948774 | 53949464 |
| chr12 | 53970764 | 53971128 |

|       |          |          |
|-------|----------|----------|
| chr12 | 53984180 | 53984348 |
| chr12 | 54005714 | 54005869 |
| chr12 | 54031316 | 54031536 |
| chr12 | 54037053 | 54037234 |
| chr12 | 54060847 | 54061082 |
| chr12 | 54065782 | 54065995 |
| chr12 | 54067967 | 54068241 |
| chr12 | 54068307 | 54068474 |
| chr12 | 54098836 | 54099117 |
| chr12 | 54162614 | 54163193 |
| chr12 | 54164264 | 54164416 |
| chr12 | 54187728 | 54188181 |
| chr12 | 54188224 | 54188507 |
| chr12 | 54191804 | 54192360 |
| chr12 | 54192379 | 54192578 |
| chr12 | 54197342 | 54197929 |
| chr12 | 54197986 | 54198176 |
| chr12 | 54198335 | 54198585 |
| chr12 | 54198585 | 54198806 |
| chr12 | 54203155 | 54203335 |
| chr12 | 54203335 | 54203508 |
| chr12 | 54203508 | 54203739 |
| chr12 | 54203739 | 54204040 |
| chr12 | 54283685 | 54283932 |
| chr12 | 54313045 | 54313404 |
| chr12 | 54313404 | 54313641 |
| chr12 | 54334481 | 54334790 |
| chr12 | 54334790 | 54335162 |
| chr12 | 54415143 | 54415333 |
| chr12 | 54463891 | 54464103 |
| chr12 | 54489828 | 54489987 |
| chr12 | 54516611 | 54516792 |
| chr12 | 54558214 | 54558364 |
| chr12 | 54576902 | 54577155 |
| chr12 | 54595571 | 54595992 |
| chr12 | 54596832 | 54596990 |
| chr12 | 54597983 | 54598325 |
| chr12 | 54598408 | 54598736 |
| chr12 | 54598736 | 54599003 |
| chr12 | 54612266 | 54612429 |
| chr12 | 54620050 | 54620392 |
| chr12 | 54620392 | 54620741 |

|       |          |          |
|-------|----------|----------|
| chr12 | 54621981 | 54622287 |
| chr12 | 54640321 | 54640731 |
| chr12 | 54641348 | 54641807 |
| chr12 | 54656007 | 54656460 |
| chr12 | 54656460 | 54656754 |
| chr12 | 54656754 | 54657008 |
| chr12 | 54683308 | 54683475 |
| chr12 | 54695443 | 54695731 |
| chr12 | 54695731 | 54696025 |
| chr12 | 54696429 | 54696634 |
| chr12 | 54696710 | 54697009 |
| chr12 | 54697009 | 54697352 |
| chr12 | 54697352 | 54697814 |
| chr12 | 54697814 | 54698314 |
| chr12 | 54710242 | 54711545 |
| chr12 | 54714162 | 54714387 |
| chr12 | 54714387 | 54715042 |
| chr12 | 54718471 | 54718806 |
| chr12 | 54718806 | 54719400 |
| chr12 | 54719469 | 54719703 |
| chr12 | 54729224 | 54729456 |
| chr12 | 54729530 | 54730131 |
| chr12 | 54730131 | 54730562 |
| chr12 | 54733870 | 54734352 |
| chr12 | 54734352 | 54734774 |
| chr12 | 54737373 | 54738199 |
| chr12 | 54738199 | 54738693 |
| chr12 | 54744140 | 54744301 |
| chr12 | 54744493 | 54744658 |
| chr12 | 54758997 | 54759147 |
| chr12 | 54774058 | 54774279 |
| chr12 | 54774279 | 54774572 |
| chr12 | 54782557 | 54782823 |
| chr12 | 54789369 | 54789699 |
| chr12 | 54789819 | 54790130 |
| chr12 | 54795117 | 54795512 |
| chr12 | 54795512 | 54796105 |
| chr12 | 54796568 | 54796775 |
| chr12 | 54796775 | 54796970 |
| chr12 | 54805665 | 54805925 |
| chr12 | 54805925 | 54806213 |
| chr12 | 54806213 | 54806535 |

|       |          |          |
|-------|----------|----------|
| chr12 | 54810200 | 54810552 |
| chr12 | 54819299 | 54819455 |
| chr12 | 54825261 | 54825544 |
| chr12 | 54830663 | 54830890 |
| chr12 | 54834076 | 54834263 |
| chr12 | 54834824 | 54835185 |
| chr12 | 54835185 | 54835487 |
| chr12 | 54837335 | 54837585 |
| chr12 | 54839925 | 54840227 |
| chr12 | 54858253 | 54858490 |
| chr12 | 54861985 | 54862237 |
| chr12 | 54862356 | 54863200 |
| chr12 | 54863270 | 54863468 |
| chr12 | 54874671 | 54875297 |
| chr12 | 54881411 | 54881574 |
| chr12 | 54890548 | 54890714 |
| chr12 | 54903051 | 54903280 |
| chr12 | 54937581 | 54938042 |
| chr12 | 54940062 | 54940265 |
| chr12 | 54940937 | 54941247 |
| chr12 | 54952653 | 54952752 |
| chr12 | 54952752 | 54952803 |
| chr12 | 54984735 | 54984974 |
| chr12 | 54984974 | 54985285 |
| chr12 | 54985285 | 54985616 |
| chr12 | 54985623 | 54985852 |
| chr12 | 54985852 | 54986177 |
| chr12 | 54986177 | 54986590 |
| chr12 | 54996009 | 54996353 |
| chr12 | 54998728 | 54998885 |
| chr12 | 54998988 | 54999332 |
| chr12 | 54999332 | 54999738 |
| chr12 | 55007448 | 55007692 |
| chr12 | 55007713 | 55008011 |
| chr12 | 55008011 | 55008313 |
| chr12 | 55008390 | 55008577 |
| chr12 | 55016298 | 55016928 |
| chr12 | 55026780 | 55026970 |
| chr12 | 55026988 | 55027574 |
| chr12 | 55078779 | 55078990 |
| chr12 | 55079800 | 55080034 |
| chr12 | 55080034 | 55080329 |

|       |          |          |
|-------|----------|----------|
| chr12 | 55080329 | 55080628 |
| chr12 | 55080628 | 55080886 |
| chr12 | 55112696 | 55113010 |
| chr12 | 55124193 | 55124626 |
| chr12 | 55124626 | 55125185 |
| chr12 | 55132050 | 55132359 |
| chr12 | 55132359 | 55132623 |
| chr12 | 55132623 | 55132839 |
| chr12 | 55140458 | 55140616 |
| chr12 | 55154637 | 55154873 |
| chr12 | 55154873 | 55155163 |
| chr12 | 55155163 | 55155468 |
| chr12 | 55155468 | 55155760 |
| chr12 | 55187755 | 55188025 |
| chr12 | 55199256 | 55199692 |
| chr12 | 55199692 | 55200175 |
| chr12 | 55207151 | 55207432 |
| chr12 | 55207432 | 55207694 |
| chr12 | 55207694 | 55207910 |
| chr12 | 55215522 | 55215686 |
| chr12 | 55229700 | 55229938 |
| chr12 | 55229938 | 55230230 |
| chr12 | 55230230 | 55230530 |
| chr12 | 55230530 | 55230810 |
| chr12 | 55262021 | 55262325 |
| chr12 | 55272382 | 55272577 |
| chr12 | 55280153 | 55280366 |
| chr12 | 55302324 | 55302868 |
| chr12 | 55302879 | 55303086 |
| chr12 | 55303131 | 55303360 |
| chr12 | 55311971 | 55312138 |
| chr12 | 55313979 | 55314148 |
| chr12 | 55315176 | 55315571 |
| chr12 | 55324320 | 55324574 |
| chr12 | 55324574 | 55324805 |
| chr12 | 55324878 | 55325208 |
| chr12 | 55333787 | 55333953 |
| chr12 | 55334365 | 55334721 |
| chr12 | 55343135 | 55343506 |
| chr12 | 55343506 | 55343849 |
| chr12 | 55343849 | 55344152 |
| chr12 | 55347879 | 55348084 |



|       |          |          |
|-------|----------|----------|
| chr12 | 55348276 | 55348552 |
| chr12 | 55348865 | 55349073 |
| chr12 | 55349073 | 55349215 |
| chr12 | 55350578 | 55350818 |
| chr12 | 55354976 | 55355236 |
| chr12 | 55355473 | 55355688 |
| chr12 | 55384069 | 55384325 |
| chr12 | 55387794 | 55387979 |
| chr12 | 55388665 | 55388876 |
| chr12 | 55392078 | 55392376 |
| chr12 | 55393114 | 55393393 |
| chr12 | 55393393 | 55393642 |
| chr12 | 55398225 | 55398385 |
| chr12 | 55398425 | 55398903 |
| chr12 | 55398903 | 55399132 |
| chr12 | 55399132 | 55399319 |
| chr12 | 55407866 | 55408325 |
| chr12 | 55427075 | 55427275 |
| chr12 | 55432389 | 55432584 |
| chr12 | 55433841 | 55434177 |
| chr12 | 55436857 | 55437136 |
| chr12 | 55437136 | 55437556 |
| chr12 | 55437559 | 55437715 |
| chr12 | 55438915 | 55439136 |
| chr12 | 55443055 | 55443697 |
| chr12 | 55457693 | 55457941 |
| chr12 | 55464413 | 55464639 |
| chr12 | 55464818 | 55465129 |
| chr12 | 55465129 | 55465351 |
| chr12 | 55465625 | 55465915 |
| chr12 | 55466308 | 55466729 |
| chr12 | 55466879 | 55467196 |
| chr12 | 55471469 | 55471761 |
| chr12 | 55473655 | 55474231 |
| chr12 | 55480573 | 55480874 |
| chr12 | 55480874 | 55481200 |
| chr12 | 55491634 | 55492299 |
| chr12 | 55492299 | 55492942 |
| chr12 | 55495135 | 55495527 |
| chr12 | 55497803 | 55498121 |
| chr12 | 55499095 | 55499401 |
| chr12 | 55506028 | 55506178 |

|       |          |          |
|-------|----------|----------|
| chr12 | 55509679 | 55509846 |
| chr12 | 55518029 | 55518273 |
| chr12 | 55538386 | 55538630 |
| chr12 | 55538630 | 55538889 |
| chr12 | 55552718 | 55552868 |
| chr12 | 55573969 | 55574131 |
| chr12 | 55574460 | 55574646 |
| chr12 | 55590475 | 55590625 |
| chr12 | 55598981 | 55599225 |
| chr12 | 55599225 | 55599596 |
| chr12 | 55599606 | 55599831 |
| chr12 | 55599831 | 55600028 |
| chr12 | 55600028 | 55600267 |
| chr12 | 55600267 | 55600736 |
| chr12 | 55642464 | 55642685 |
| chr12 | 55720414 | 55720627 |
| chr12 | 55769160 | 55769420 |
| chr12 | 55778364 | 55778580 |
| chr12 | 55820130 | 55820423 |
| chr12 | 55820423 | 55820715 |
| chr12 | 55820715 | 55820989 |
| chr12 | 55820989 | 55821351 |
| chr12 | 55831155 | 55831410 |
| chr12 | 55835957 | 55836520 |
| chr12 | 55836520 | 55837040 |
| chr12 | 55846451 | 55846610 |
| chr12 | 55846822 | 55847071 |
| chr12 | 55906459 | 55906625 |
| chr12 | 55930490 | 55930756 |
| chr12 | 55954148 | 55954399 |
| chr12 | 56057204 | 56057360 |
| chr12 | 56058529 | 56058786 |
| chr12 | 56062073 | 56062477 |
| chr12 | 56068419 | 56068599 |
| chr12 | 56087592 | 56087748 |
| chr12 | 56090175 | 56090348 |
| chr12 | 56144176 | 56144429 |
| chr12 | 56144429 | 56144965 |
| chr12 | 56241772 | 56242079 |
| chr12 | 56247726 | 56247912 |
| chr12 | 56250388 | 56250574 |
| chr12 | 56250632 | 56250959 |

|       |          |          |
|-------|----------|----------|
| chr12 | 56275448 | 56275937 |
| chr12 | 56277143 | 56277299 |
| chr12 | 56288097 | 56288319 |
| chr12 | 56288343 | 56288900 |
| chr12 | 56296486 | 56296785 |
| chr12 | 56298734 | 56298984 |
| chr12 | 56298984 | 56299191 |
| chr12 | 56299191 | 56299427 |
| chr12 | 56299427 | 56299695 |
| chr12 | 56299707 | 56299881 |
| chr12 | 56318896 | 56319389 |
| chr12 | 56339400 | 56339550 |
| chr12 | 56339714 | 56339913 |
| chr12 | 56341810 | 56341985 |
| chr12 | 56345383 | 56345732 |
| chr12 | 56345732 | 56346095 |
| chr12 | 56350758 | 56351003 |
| chr12 | 56357517 | 56358147 |
| chr12 | 56378294 | 56378484 |
| chr12 | 56378484 | 56378763 |
| chr12 | 56404939 | 56405178 |
| chr12 | 56414588 | 56414843 |
| chr12 | 56414843 | 56415166 |
| chr12 | 56415166 | 56415449 |
| chr12 | 56426959 | 56427162 |
| chr12 | 56508451 | 56508792 |
| chr12 | 56513599 | 56513893 |
| chr12 | 56513893 | 56514199 |
| chr12 | 56518256 | 56518517 |
| chr12 | 56519513 | 56519711 |
| chr12 | 56519711 | 56520191 |
| chr12 | 56521042 | 56521358 |
| chr12 | 56525296 | 56525794 |
| chr12 | 56527964 | 56528124 |
| chr12 | 56533042 | 56533385 |
| chr12 | 56533385 | 56533917 |
| chr12 | 56534153 | 56534389 |
| chr12 | 56534514 | 56534807 |
| chr12 | 56534807 | 56535035 |
| chr12 | 56535129 | 56535386 |
| chr12 | 56535552 | 56535714 |
| chr12 | 56535739 | 56536340 |

|       |          |          |
|-------|----------|----------|
| chr12 | 56541107 | 56541476 |
| chr12 | 56555671 | 56555876 |
| chr12 | 56578101 | 56578280 |
| chr12 | 56587714 | 56588094 |
| chr12 | 56589199 | 56589358 |
| chr12 | 56611841 | 56612043 |
| chr12 | 56612043 | 56612238 |
| chr12 | 56612238 | 56612405 |
| chr12 | 56612718 | 56613168 |
| chr12 | 56613294 | 56613444 |
| chr12 | 56636884 | 56637122 |
| chr12 | 56674864 | 56675047 |
| chr12 | 56681019 | 56681278 |
| chr12 | 56681278 | 56681552 |
| chr12 | 56681552 | 56681864 |
| chr12 | 56695349 | 56695747 |
| chr12 | 56695747 | 56696092 |
| chr12 | 56696394 | 56696563 |
| chr12 | 56696563 | 56696727 |
| chr12 | 56696729 | 56697193 |
| chr12 | 56707397 | 56707652 |
| chr12 | 56779464 | 56779679 |
| chr12 | 56779679 | 56780196 |
| chr12 | 56780278 | 56780658 |
| chr12 | 56781346 | 56781567 |
| chr12 | 56785367 | 56785589 |
| chr12 | 56794642 | 56794895 |
| chr12 | 56799110 | 56799335 |
| chr12 | 56801694 | 56801924 |
| chr12 | 56804401 | 56804938 |
| chr12 | 56829501 | 56829810 |
| chr12 | 56830407 | 56830772 |
| chr12 | 56830820 | 56831089 |
| chr12 | 56831407 | 56831747 |
| chr12 | 56903088 | 56903448 |
| chr12 | 56905757 | 56905960 |
| chr12 | 56905960 | 56906167 |
| chr12 | 56918204 | 56918358 |
| chr12 | 56933986 | 56934179 |
| chr12 | 56944743 | 56944904 |
| chr12 | 56956173 | 56956433 |
| chr12 | 57087182 | 57087390 |

|       |          |          |
|-------|----------|----------|
| chr12 | 57157810 | 57158000 |
| chr12 | 57159028 | 57159393 |
| chr12 | 57159902 | 57160304 |
| chr12 | 57160770 | 57161186 |
| chr12 | 57179445 | 57179867 |
| chr12 | 57179867 | 57180188 |
| chr12 | 57185567 | 57185784 |
| chr12 | 57189649 | 57189944 |
| chr12 | 57194746 | 57194979 |
| chr12 | 57201491 | 57201914 |
| chr12 | 57202124 | 57202395 |
| chr12 | 57230085 | 57230434 |
| chr12 | 57230434 | 57230863 |
| chr12 | 57231130 | 57231350 |
| chr12 | 57285746 | 57285982 |
| chr12 | 57339083 | 57339457 |
| chr12 | 57340082 | 57340487 |
| chr12 | 57478533 | 57478710 |
| chr12 | 57482392 | 57482556 |
| chr12 | 57487993 | 57488429 |
| chr12 | 57490454 | 57490853 |
| chr12 | 57505435 | 57505650 |
| chr12 | 57532339 | 57532629 |
| chr12 | 57534270 | 57534482 |
| chr12 | 57534524 | 57534811 |
| chr12 | 57534811 | 57535187 |
| chr12 | 57535346 | 57535577 |
| chr12 | 57535996 | 57536394 |
| chr12 | 57539059 | 57539274 |
| chr12 | 57542034 | 57542268 |
| chr12 | 57542365 | 57542591 |
| chr12 | 57543837 | 57543987 |
| chr12 | 57545578 | 57545928 |
| chr12 | 57545928 | 57546231 |
| chr12 | 57546350 | 57547182 |
| chr12 | 57551606 | 57551858 |
| chr12 | 57567936 | 57568230 |
| chr12 | 57569016 | 57569212 |
| chr12 | 57571839 | 57572104 |
| chr12 | 57572452 | 57572773 |
| chr12 | 57575994 | 57576203 |
| chr12 | 57587609 | 57587894 |

|       |          |          |
|-------|----------|----------|
| chr12 | 57607736 | 57607916 |
| chr12 | 57622192 | 57622366 |
| chr12 | 57697709 | 57698002 |
| chr12 | 57710074 | 57710261 |
| chr12 | 57787536 | 57787801 |
| chr12 | 58213709 | 58213947 |
| chr12 | 58445532 | 58445685 |
| chr12 | 58454925 | 58455147 |
| chr12 | 58516935 | 58517143 |
| chr12 | 58722175 | 58722368 |
| chr12 | 58802511 | 58802728 |
| chr12 | 58821319 | 58821637 |
| chr12 | 58827883 | 58828253 |
| chr12 | 58832053 | 58832262 |
| chr12 | 58851989 | 58852486 |
| chr12 | 58852636 | 58853021 |
| chr12 | 58877470 | 58877952 |
| chr12 | 58924129 | 58924279 |
| chr12 | 58964727 | 58964924 |
| chr12 | 59010609 | 59010790 |
| chr12 | 59011392 | 59011735 |
| chr12 | 59011735 | 59012357 |
| chr12 | 59013251 | 59013533 |
| chr12 | 59013533 | 59013740 |
| chr12 | 59027526 | 59027783 |
| chr12 | 59032217 | 59032395 |
| chr12 | 59039941 | 59040198 |
| chr12 | 59040254 | 59040596 |
| chr12 | 59040596 | 59040852 |
| chr12 | 59040852 | 59041182 |
| chr12 | 59041182 | 59041476 |
| chr12 | 59041476 | 59041779 |
| chr12 | 59041921 | 59042104 |
| chr12 | 59060923 | 59061274 |
| chr12 | 59061274 | 59061646 |
| chr12 | 59066423 | 59066702 |
| chr12 | 59066702 | 59067043 |
| chr12 | 59067043 | 59067488 |
| chr12 | 59077043 | 59077438 |
| chr12 | 59077438 | 59077806 |
| chr12 | 59077882 | 59078227 |
| chr12 | 59084472 | 59084686 |

|       |          |          |
|-------|----------|----------|
| chr12 | 59084988 | 59085349 |
| chr12 | 59085930 | 59086114 |
| chr12 | 59086190 | 59086555 |
| chr12 | 59095210 | 59095670 |
| chr12 | 59095670 | 59095962 |
| chr12 | 59097112 | 59097368 |
| chr12 | 59098350 | 59098761 |
| chr12 | 59106494 | 59106644 |
| chr12 | 59129044 | 59129410 |
| chr12 | 59129640 | 59129838 |
| chr12 | 59130764 | 59130995 |
| chr12 | 59130995 | 59131226 |
| chr12 | 59131226 | 59131915 |
| chr12 | 59133039 | 59133199 |
| chr12 | 59139432 | 59139683 |
| chr12 | 59140397 | 59140633 |
| chr12 | 59177065 | 59177264 |
| chr12 | 59198721 | 59199178 |
| chr12 | 59218689 | 59219180 |
| chr12 | 59219180 | 59219699 |
| chr12 | 59219699 | 59220010 |
| chr12 | 59220010 | 59220269 |
| chr12 | 59224934 | 59225475 |
| chr12 | 59226729 | 59227032 |
| chr12 | 59228493 | 59228724 |
| chr12 | 59382894 | 59383102 |
| chr12 | 59582386 | 59583030 |
| chr12 | 59583030 | 59583392 |
| chr12 | 59616029 | 59616272 |
| chr12 | 59623297 | 59623513 |
| chr12 | 59623934 | 59624263 |
| chr12 | 59691802 | 59691975 |
| chr12 | 59736582 | 59736752 |
| chr12 | 59773818 | 59774135 |
| chr12 | 59774135 | 59774328 |
| chr12 | 59775010 | 59775420 |
| chr12 | 59939781 | 59940054 |
| chr12 | 60292678 | 60292944 |
| chr12 | 60967553 | 60967712 |
| chr12 | 61323320 | 61323479 |
| chr12 | 61523021 | 61523406 |
| chr12 | 63103792 | 63104053 |

|       |          |          |
|-------|----------|----------|
| chr12 | 63152703 | 63152953 |
| chr12 | 63164617 | 63164904 |
| chr12 | 63187270 | 63187514 |
| chr12 | 63204660 | 63204874 |
| chr12 | 63205239 | 63205500 |
| chr12 | 63240387 | 63240845 |
| chr12 | 63449869 | 63450089 |
| chr12 | 64435102 | 64435272 |
| chr12 | 64829731 | 64829967 |
| chr12 | 64871218 | 64871431 |
| chr12 | 64897411 | 64897643 |
| chr12 | 64900315 | 64900484 |
| chr12 | 64917588 | 64917966 |
| chr12 | 64917966 | 64918291 |
| chr12 | 64918291 | 64918547 |
| chr12 | 64937600 | 64937822 |
| chr12 | 64965216 | 64965483 |
| chr12 | 64965483 | 64965931 |
| chr12 | 64965931 | 64966458 |
| chr12 | 64967696 | 64967877 |
| chr12 | 64970653 | 64970885 |
| chr12 | 64974996 | 64975166 |
| chr12 | 64975595 | 64975935 |
| chr12 | 64976152 | 64976544 |
| chr12 | 64976855 | 64977005 |
| chr12 | 65022908 | 65023188 |
| chr12 | 65036148 | 65036463 |
| chr12 | 65036463 | 65036855 |
| chr12 | 65037257 | 65037410 |
| chr12 | 65037590 | 65037904 |
| chr12 | 65039266 | 65039520 |
| chr12 | 65061175 | 65061381 |
| chr12 | 65073361 | 65073845 |
| chr12 | 65073845 | 65074350 |
| chr12 | 65075406 | 65075763 |
| chr12 | 65075763 | 65076067 |
| chr12 | 65100642 | 65100793 |
| chr12 | 65114106 | 65114271 |
| chr12 | 65115215 | 65115525 |
| chr12 | 65131196 | 65131347 |
| chr12 | 65171910 | 65172118 |
| chr12 | 65172147 | 65172558 |



|       |          |          |
|-------|----------|----------|
| chr12 | 65172558 | 65172934 |
| chr12 | 65172934 | 65173308 |
| chr12 | 65194232 | 65194521 |
| chr12 | 65195780 | 65195944 |
| chr12 | 65195946 | 65196140 |
| chr12 | 65357920 | 65358077 |
| chr12 | 65478809 | 65479014 |
| chr12 | 65502054 | 65502352 |
| chr12 | 66118199 | 66118512 |
| chr12 | 66118636 | 66118786 |
| chr12 | 66483013 | 66483209 |
| chr12 | 66601325 | 66601497 |
| chr12 | 66707510 | 66707716 |
| chr12 | 66734582 | 66734928 |
| chr12 | 66784372 | 66784638 |
| chr12 | 67059101 | 67059769 |
| chr12 | 67127545 | 67127789 |
| chr12 | 67862641 | 67862868 |
| chr12 | 67963541 | 67963868 |
| chr12 | 67993318 | 67993468 |
| chr12 | 67993481 | 67993835 |
| chr12 | 68005353 | 68005923 |
| chr12 | 68007887 | 68008309 |
| chr12 | 68092078 | 68092465 |
| chr12 | 68139818 | 68140244 |
| chr12 | 68493117 | 68493274 |
| chr12 | 68543426 | 68543658 |
| chr12 | 68672182 | 68672372 |
| chr12 | 68746347 | 68746536 |
| chr12 | 68766083 | 68766302 |
| chr12 | 68782526 | 68782943 |
| chr12 | 68783064 | 68783240 |
| chr12 | 68794433 | 68794731 |
| chr12 | 68877319 | 68877529 |
| chr12 | 69027950 | 69028169 |
| chr12 | 69119997 | 69120258 |
| chr12 | 69127223 | 69127473 |
| chr12 | 69132073 | 69132280 |
| chr12 | 69158589 | 69159041 |
| chr12 | 69159041 | 69159286 |
| chr12 | 69159286 | 69159682 |
| chr12 | 69168254 | 69168644 |

|       |          |          |
|-------|----------|----------|
| chr12 | 69168663 | 69168938 |
| chr12 | 69168938 | 69169207 |
| chr12 | 69183637 | 69183956 |
| chr12 | 69183956 | 69184359 |
| chr12 | 69184359 | 69184695 |
| chr12 | 69184695 | 69184898 |
| chr12 | 69184898 | 69185119 |
| chr12 | 69190581 | 69190823 |
| chr12 | 69196698 | 69197017 |
| chr12 | 69197017 | 69197318 |
| chr12 | 69197318 | 69197727 |
| chr12 | 69197727 | 69198204 |
| chr12 | 69198204 | 69198531 |
| chr12 | 69208610 | 69208821 |
| chr12 | 69213658 | 69213808 |
| chr12 | 69214850 | 69215040 |
| chr12 | 69215054 | 69215327 |
| chr12 | 69227744 | 69228083 |
| chr12 | 69228083 | 69228572 |
| chr12 | 69231143 | 69231352 |
| chr12 | 69235507 | 69235725 |
| chr12 | 69235820 | 69236156 |
| chr12 | 69239598 | 69239754 |
| chr12 | 69241532 | 69242408 |
| chr12 | 69253863 | 69254313 |
| chr12 | 69270834 | 69270984 |
| chr12 | 69296490 | 69296940 |
| chr12 | 69296940 | 69297591 |
| chr12 | 69298311 | 69298620 |
| chr12 | 69304111 | 69304405 |
| chr12 | 69333644 | 69333864 |
| chr12 | 69356971 | 69357235 |
| chr12 | 69361119 | 69361607 |
| chr12 | 69361607 | 69361925 |
| chr12 | 69362534 | 69362684 |
| chr12 | 69364169 | 69364427 |
| chr12 | 69371439 | 69371658 |
| chr12 | 69371658 | 69371911 |
| chr12 | 69371911 | 69372320 |
| chr12 | 69372320 | 69372877 |
| chr12 | 69373812 | 69374090 |
| chr12 | 69379468 | 69379618 |

|       |          |          |
|-------|----------|----------|
| chr12 | 69380861 | 69381027 |
| chr12 | 69385902 | 69386346 |
| chr12 | 69386709 | 69386940 |
| chr12 | 69388282 | 69388565 |
| chr12 | 69388565 | 69388842 |
| chr12 | 69389643 | 69389793 |
| chr12 | 69390024 | 69390533 |
| chr12 | 69402199 | 69402425 |
| chr12 | 69404194 | 69404349 |
| chr12 | 69410864 | 69411203 |
| chr12 | 69411988 | 69412452 |
| chr12 | 69414936 | 69415144 |
| chr12 | 69416791 | 69417319 |
| chr12 | 69417972 | 69418136 |
| chr12 | 69419087 | 69419285 |
| chr12 | 69419694 | 69419945 |
| chr12 | 69422646 | 69423151 |
| chr12 | 69423175 | 69423440 |
| chr12 | 69424917 | 69425203 |
| chr12 | 69428052 | 69428506 |
| chr12 | 69432056 | 69432314 |
| chr12 | 69436805 | 69436955 |
| chr12 | 69437127 | 69437544 |
| chr12 | 69442349 | 69442703 |
| chr12 | 69446515 | 69446992 |
| chr12 | 69447295 | 69447616 |
| chr12 | 69447938 | 69448257 |
| chr12 | 69450350 | 69450718 |
| chr12 | 69451066 | 69451435 |
| chr12 | 69452987 | 69453247 |
| chr12 | 69453247 | 69453524 |
| chr12 | 69456647 | 69457054 |
| chr12 | 69458045 | 69458317 |
| chr12 | 69458385 | 69458625 |
| chr12 | 69458625 | 69458853 |
| chr12 | 69468022 | 69468279 |
| chr12 | 69474436 | 69474608 |
| chr12 | 69474839 | 69475650 |
| chr12 | 69501387 | 69501547 |
| chr12 | 69501808 | 69502006 |
| chr12 | 69502079 | 69502385 |
| chr12 | 69502385 | 69502743 |

|       |          |          |
|-------|----------|----------|
| chr12 | 69502743 | 69503066 |
| chr12 | 69510673 | 69511209 |
| chr12 | 69513177 | 69513561 |
| chr12 | 69513615 | 69513801 |
| chr12 | 69516493 | 69516976 |
| chr12 | 69520305 | 69520608 |
| chr12 | 69526877 | 69527154 |
| chr12 | 69531661 | 69532050 |
| chr12 | 69537261 | 69537675 |
| chr12 | 69537675 | 69538043 |
| chr12 | 69538043 | 69538416 |
| chr12 | 69539381 | 69539680 |
| chr12 | 69542351 | 69542887 |
| chr12 | 69544304 | 69544606 |
| chr12 | 69568348 | 69568597 |
| chr12 | 69569993 | 69570258 |
| chr12 | 69573363 | 69573734 |
| chr12 | 69573734 | 69574065 |
| chr12 | 69574065 | 69574277 |
| chr12 | 69574384 | 69574545 |
| chr12 | 69574591 | 69574822 |
| chr12 | 69582213 | 69582365 |
| chr12 | 69582575 | 69582867 |
| chr12 | 69582867 | 69583390 |
| chr12 | 69597485 | 69597824 |
| chr12 | 69608573 | 69608797 |
| chr12 | 69611832 | 69611989 |
| chr12 | 69634853 | 69635078 |
| chr12 | 69653987 | 69654408 |
| chr12 | 69680658 | 69680865 |
| chr12 | 69680865 | 69681108 |
| chr12 | 69681108 | 69681296 |
| chr12 | 69681298 | 69681671 |
| chr12 | 69681671 | 69682080 |
| chr12 | 69682080 | 69682457 |
| chr12 | 69682461 | 69682611 |
| chr12 | 69683648 | 69683919 |
| chr12 | 69686601 | 69686794 |
| chr12 | 69688373 | 69688556 |
| chr12 | 69688556 | 69688731 |
| chr12 | 69696815 | 69697060 |
| chr12 | 69705171 | 69705417 |

|       |          |          |
|-------|----------|----------|
| chr12 | 69724342 | 69724922 |
| chr12 | 69724922 | 69725114 |
| chr12 | 69725114 | 69725454 |
| chr12 | 69733586 | 69733829 |
| chr12 | 69736492 | 69736784 |
| chr12 | 69741975 | 69742414 |
| chr12 | 69743824 | 69744034 |
| chr12 | 69744104 | 69744559 |
| chr12 | 69753748 | 69754385 |
| chr12 | 69757561 | 69757852 |
| chr12 | 69757852 | 69758208 |
| chr12 | 69765665 | 69765830 |
| chr12 | 69766192 | 69766401 |
| chr12 | 69790237 | 69790530 |
| chr12 | 69790530 | 69791012 |
| chr12 | 69791012 | 69791406 |
| chr12 | 69814189 | 69814633 |
| chr12 | 69824898 | 69825237 |
| chr12 | 69825285 | 69825525 |
| chr12 | 69828302 | 69828566 |
| chr12 | 69828582 | 69828824 |
| chr12 | 69829858 | 69830169 |
| chr12 | 69833993 | 69834297 |
| chr12 | 69834297 | 69834646 |
| chr12 | 69843638 | 69843804 |
| chr12 | 69869507 | 69869811 |
| chr12 | 69871077 | 69871228 |
| chr12 | 69879109 | 69879695 |
| chr12 | 69884115 | 69884407 |
| chr12 | 69884915 | 69885185 |
| chr12 | 69885185 | 69885528 |
| chr12 | 69887797 | 69888152 |
| chr12 | 69892484 | 69892727 |
| chr12 | 69892727 | 69892991 |
| chr12 | 69892991 | 69893544 |
| chr12 | 69898174 | 69898465 |
| chr12 | 69924150 | 69924307 |
| chr12 | 69941584 | 69941924 |
| chr12 | 69945974 | 69946139 |
| chr12 | 69962542 | 69962798 |
| chr12 | 69967202 | 69967468 |
| chr12 | 69971471 | 69971693 |

|       |          |          |
|-------|----------|----------|
| chr12 | 69975975 | 69976170 |
| chr12 | 69985592 | 69985828 |
| chr12 | 69986126 | 69986395 |
| chr12 | 69986395 | 69986824 |
| chr12 | 69986824 | 69987176 |
| chr12 | 69987176 | 69987513 |
| chr12 | 69997642 | 69997876 |
| chr12 | 69998179 | 69998570 |
| chr12 | 69998608 | 69998988 |
| chr12 | 69999914 | 70000127 |
| chr12 | 70011806 | 70011959 |
| chr12 | 70029973 | 70030133 |
| chr12 | 70059553 | 70059716 |
| chr12 | 70062185 | 70062421 |
| chr12 | 70077959 | 70078185 |
| chr12 | 70088422 | 70088715 |
| chr12 | 70089902 | 70090289 |
| chr12 | 70097364 | 70097693 |
| chr12 | 70098914 | 70099064 |
| chr12 | 70099160 | 70099463 |
| chr12 | 70100527 | 70100824 |
| chr12 | 70103013 | 70103465 |
| chr12 | 70104182 | 70104566 |
| chr12 | 70110949 | 70111126 |
| chr12 | 70111166 | 70111471 |
| chr12 | 70111471 | 70111634 |
| chr12 | 70111634 | 70111832 |
| chr12 | 70111832 | 70112236 |
| chr12 | 70117048 | 70117500 |
| chr12 | 70117529 | 70117719 |
| chr12 | 70126044 | 70126261 |
| chr12 | 70126516 | 70127029 |
| chr12 | 70127036 | 70127186 |
| chr12 | 70148991 | 70149165 |
| chr12 | 70161120 | 70161402 |
| chr12 | 70173858 | 70174350 |
| chr12 | 70194858 | 70195207 |
| chr12 | 70195207 | 70195665 |
| chr12 | 70196363 | 70196670 |
| chr12 | 70204426 | 70204779 |
| chr12 | 70227187 | 70227433 |
| chr12 | 70227436 | 70227924 |

|       |          |          |
|-------|----------|----------|
| chr12 | 70233069 | 70233220 |
| chr12 | 70234446 | 70234702 |
| chr12 | 70234951 | 70235283 |
| chr12 | 70235283 | 70235474 |
| chr12 | 70239865 | 70240031 |
| chr12 | 70284970 | 70285410 |
| chr12 | 70291994 | 70292303 |
| chr12 | 70300811 | 70301032 |
| chr12 | 70319208 | 70319408 |
| chr12 | 70347106 | 70347643 |
| chr12 | 70360402 | 70360663 |
| chr12 | 70367709 | 70367886 |
| chr12 | 70440099 | 70440304 |
| chr12 | 70452691 | 70453247 |
| chr12 | 70453247 | 70453604 |
| chr12 | 70476405 | 70476556 |
| chr12 | 70476955 | 70477129 |
| chr12 | 70477610 | 70477818 |
| chr12 | 70494872 | 70495271 |
| chr12 | 70495271 | 70495587 |
| chr12 | 70513865 | 70514259 |
| chr12 | 70523538 | 70523749 |
| chr12 | 70532913 | 70533169 |
| chr12 | 70543285 | 70543565 |
| chr12 | 70547061 | 70547630 |
| chr12 | 70553869 | 70554337 |
| chr12 | 70554588 | 70555011 |
| chr12 | 70555013 | 70555196 |
| chr12 | 70555791 | 70556027 |
| chr12 | 70564149 | 70564420 |
| chr12 | 70577893 | 70578043 |
| chr12 | 70590480 | 70591135 |
| chr12 | 70614752 | 70615006 |
| chr12 | 70615770 | 70616055 |
| chr12 | 70616541 | 70616988 |
| chr12 | 70616988 | 70617396 |
| chr12 | 70618486 | 70618682 |
| chr12 | 70619552 | 70619779 |
| chr12 | 70624305 | 70624716 |
| chr12 | 70628432 | 70629246 |
| chr12 | 70633149 | 70633582 |
| chr12 | 70633582 | 70633975 |

|       |          |          |
|-------|----------|----------|
| chr12 | 70633982 | 70634222 |
| chr12 | 70634222 | 70634427 |
| chr12 | 70649488 | 70649727 |
| chr12 | 70649727 | 70650235 |
| chr12 | 70655384 | 70655910 |
| chr12 | 70655952 | 70656172 |
| chr12 | 70660324 | 70660772 |
| chr12 | 70681596 | 70681764 |
| chr12 | 70695038 | 70695390 |
| chr12 | 70695390 | 70695804 |
| chr12 | 70696295 | 70696474 |
| chr12 | 70705789 | 70706046 |
| chr12 | 70706874 | 70707422 |
| chr12 | 70707498 | 70707951 |
| chr12 | 70712362 | 70712658 |
| chr12 | 70712658 | 70712950 |
| chr12 | 70712950 | 70713392 |
| chr12 | 70720223 | 70720589 |
| chr12 | 70720589 | 70720926 |
| chr12 | 70721273 | 70721645 |
| chr12 | 70730061 | 70730316 |
| chr12 | 70739815 | 70740088 |
| chr12 | 70740361 | 70740642 |
| chr12 | 70740724 | 70740949 |
| chr12 | 70757941 | 70758600 |
| chr12 | 70769403 | 70770176 |
| chr12 | 70778684 | 70779058 |
| chr12 | 70779058 | 70779350 |
| chr12 | 70794905 | 70795630 |
| chr12 | 70799446 | 70799790 |
| chr12 | 70799790 | 70800016 |
| chr12 | 70800365 | 70800526 |
| chr12 | 70805044 | 70805318 |
| chr12 | 70812889 | 70813158 |
| chr12 | 70813158 | 70813471 |
| chr12 | 70824731 | 70824912 |
| chr12 | 70824912 | 70825169 |
| chr12 | 70825169 | 70825427 |
| chr12 | 70825427 | 70825736 |
| chr12 | 70825736 | 70826130 |
| chr12 | 70830996 | 70831366 |
| chr12 | 70833133 | 70833332 |



|       |          |          |
|-------|----------|----------|
| chr12 | 70835016 | 70835428 |
| chr12 | 70845463 | 70845665 |
| chr12 | 70848705 | 70849056 |
| chr12 | 70849056 | 70849415 |
| chr12 | 70851925 | 70852138 |
| chr12 | 70854607 | 70854801 |
| chr12 | 70877692 | 70877975 |
| chr12 | 70879395 | 70879626 |
| chr12 | 70881140 | 70881648 |
| chr12 | 70881910 | 70882179 |
| chr12 | 70885043 | 70885201 |
| chr12 | 70890779 | 70891493 |
| chr12 | 70891598 | 70891920 |
| chr12 | 70897332 | 70897631 |
| chr12 | 70901395 | 70901719 |
| chr12 | 70903347 | 70903510 |
| chr12 | 70909953 | 70910481 |
| chr12 | 70910481 | 70910749 |
| chr12 | 70910952 | 70911360 |
| chr12 | 70913548 | 70913766 |
| chr12 | 70914534 | 70914684 |
| chr12 | 70937276 | 70937580 |
| chr12 | 70937580 | 70937832 |
| chr12 | 70937832 | 70938025 |
| chr12 | 70938025 | 70938505 |
| chr12 | 70948805 | 70948958 |
| chr12 | 70968054 | 70968448 |
| chr12 | 70968448 | 70968820 |
| chr12 | 70968850 | 70969058 |
| chr12 | 70969058 | 70969273 |
| chr12 | 70969847 | 70970109 |
| chr12 | 70974388 | 70974813 |
| chr12 | 70974813 | 70975049 |
| chr12 | 70975049 | 70975311 |
| chr12 | 71003999 | 71004371 |
| chr12 | 71009811 | 71010134 |
| chr12 | 71015103 | 71015554 |
| chr12 | 71015554 | 71016348 |
| chr12 | 71016454 | 71016664 |
| chr12 | 71016664 | 71016880 |
| chr12 | 71029787 | 71030001 |
| chr12 | 71030180 | 71030737 |

|       |          |          |
|-------|----------|----------|
| chr12 | 71036772 | 71037074 |
| chr12 | 71048174 | 71048520 |
| chr12 | 71049686 | 71049837 |
| chr12 | 71051064 | 71051510 |
| chr12 | 71073186 | 71073413 |
| chr12 | 71073445 | 71073717 |
| chr12 | 71090954 | 71091144 |
| chr12 | 71091520 | 71091789 |
| chr12 | 71106218 | 71106407 |
| chr12 | 71109725 | 71110058 |
| chr12 | 71111452 | 71111664 |
| chr12 | 71113969 | 71114279 |
| chr12 | 71116507 | 71116769 |
| chr12 | 71136130 | 71136533 |
| chr12 | 71136533 | 71136777 |
| chr12 | 71136831 | 71137055 |
| chr12 | 71137055 | 71137307 |
| chr12 | 71137325 | 71137537 |
| chr12 | 71144486 | 71144680 |
| chr12 | 71147721 | 71147889 |
| chr12 | 71157222 | 71157408 |
| chr12 | 71170460 | 71170659 |
| chr12 | 71217765 | 71218387 |
| chr12 | 71258679 | 71258894 |
| chr12 | 71260247 | 71260455 |
| chr12 | 71274602 | 71274762 |
| chr12 | 71281381 | 71281588 |
| chr12 | 71285544 | 71285735 |
| chr12 | 71309464 | 71309984 |
| chr12 | 71309984 | 71310409 |
| chr12 | 71332201 | 71332459 |
| chr12 | 71333545 | 71333874 |
| chr12 | 71350182 | 71350420 |
| chr12 | 71417019 | 71417416 |
| chr12 | 71440970 | 71441186 |
| chr12 | 71487849 | 71488172 |
| chr12 | 71513949 | 71514342 |
| chr12 | 71535289 | 71535498 |
| chr12 | 71535900 | 71536120 |
| chr12 | 71577363 | 71577706 |
| chr12 | 71637369 | 71637543 |
| chr12 | 71703566 | 71703858 |

|       |          |          |
|-------|----------|----------|
| chr12 | 71705400 | 71705604 |
| chr12 | 71707837 | 71708045 |
| chr12 | 71725287 | 71725691 |
| chr12 | 71725732 | 71725992 |
| chr12 | 71737783 | 71738032 |
| chr12 | 71743191 | 71743351 |
| chr12 | 71747334 | 71747673 |
| chr12 | 71747922 | 71748397 |
| chr12 | 71748607 | 71749147 |
| chr12 | 71749147 | 71749443 |
| chr12 | 71767930 | 71768209 |
| chr12 | 71768523 | 71768731 |
| chr12 | 71815322 | 71815628 |
| chr12 | 71820124 | 71820470 |
| chr12 | 71821049 | 71821215 |
| chr12 | 71830609 | 71831316 |
| chr12 | 71831316 | 71831901 |
| chr12 | 71832401 | 71832642 |
| chr12 | 71836631 | 71836924 |
| chr12 | 71842974 | 71843139 |
| chr12 | 71846781 | 71846994 |
| chr12 | 71855955 | 71856161 |
| chr12 | 71859189 | 71859418 |
| chr12 | 71860717 | 71861140 |
| chr12 | 71861168 | 71861436 |
| chr12 | 71867376 | 71867587 |
| chr12 | 71870722 | 71871017 |
| chr12 | 71872429 | 71872601 |
| chr12 | 71883085 | 71883430 |
| chr12 | 71885085 | 71885572 |
| chr12 | 71886976 | 71887239 |
| chr12 | 71888312 | 71888792 |
| chr12 | 71889331 | 71889554 |
| chr12 | 71897436 | 71897677 |
| chr12 | 71897677 | 71897931 |
| chr12 | 71897984 | 71898605 |
| chr12 | 71898992 | 71899161 |
| chr12 | 71899624 | 71899978 |
| chr12 | 71903278 | 71903598 |
| chr12 | 71923183 | 71923335 |
| chr12 | 71926066 | 71926311 |
| chr12 | 71932803 | 71932988 |

|       |          |          |
|-------|----------|----------|
| chr12 | 71933094 | 71933288 |
| chr12 | 71936415 | 71937100 |
| chr12 | 71949783 | 71949947 |
| chr12 | 71985134 | 71985284 |
| chr12 | 72007768 | 72007926 |
| chr12 | 72014491 | 72014983 |
| chr12 | 72069940 | 72070316 |
| chr12 | 72070316 | 72070559 |
| chr12 | 72070559 | 72070802 |
| chr12 | 72070802 | 72071044 |
| chr12 | 72071044 | 72071316 |
| chr12 | 72072249 | 72072498 |
| chr12 | 72084939 | 72085464 |
| chr12 | 72085464 | 72085923 |
| chr12 | 72085923 | 72086428 |
| chr12 | 72096254 | 72096509 |
| chr12 | 72104570 | 72104864 |
| chr12 | 72236484 | 72236741 |
| chr12 | 72236741 | 72236985 |
| chr12 | 72240901 | 72241271 |
| chr12 | 72251898 | 72252537 |
| chr12 | 72274147 | 72274469 |
| chr12 | 72284765 | 72284941 |
| chr12 | 72298217 | 72298508 |
| chr12 | 72300943 | 72301376 |
| chr12 | 72324476 | 72324799 |
| chr12 | 72343770 | 72343968 |
| chr12 | 72363422 | 72363729 |
| chr12 | 72363788 | 72364138 |
| chr12 | 72408480 | 72408901 |
| chr12 | 72427851 | 72428126 |
| chr12 | 72461591 | 72461754 |
| chr12 | 72461939 | 72462167 |
| chr12 | 72487621 | 72487781 |
| chr12 | 72490067 | 72490296 |
| chr12 | 72515584 | 72515734 |
| chr12 | 72519938 | 72520163 |
| chr12 | 72520735 | 72520892 |
| chr12 | 72523346 | 72523674 |
| chr12 | 72534123 | 72534294 |
| chr12 | 72535876 | 72536656 |
| chr12 | 72654783 | 72654984 |

|       |          |          |
|-------|----------|----------|
| chr12 | 72663988 | 72664249 |
| chr12 | 72664249 | 72664589 |
| chr12 | 72664589 | 72665013 |
| chr12 | 72665013 | 72665328 |
| chr12 | 72674503 | 72674749 |
| chr12 | 72694019 | 72694233 |
| chr12 | 72694582 | 72694732 |
| chr12 | 72697944 | 72698312 |
| chr12 | 72710706 | 72711079 |
| chr12 | 72711698 | 72711971 |
| chr12 | 72731702 | 72732065 |
| chr12 | 72746896 | 72747161 |
| chr12 | 72748395 | 72748673 |
| chr12 | 72748896 | 72749186 |
| chr12 | 72760305 | 72760635 |
| chr12 | 72760635 | 72760947 |
| chr12 | 72760947 | 72761417 |
| chr12 | 72761417 | 72761948 |
| chr12 | 72821121 | 72821443 |
| chr12 | 72831995 | 72832356 |
| chr12 | 72835311 | 72835509 |
| chr12 | 72837303 | 72837655 |
| chr12 | 72844292 | 72844503 |
| chr12 | 72939695 | 72939887 |
| chr12 | 72976779 | 72977063 |
| chr12 | 72986084 | 72986472 |
| chr12 | 73002323 | 73002534 |
| chr12 | 73021022 | 73021242 |
| chr12 | 73039785 | 73039964 |
| chr12 | 73044495 | 73044682 |
| chr12 | 73044682 | 73044875 |
| chr12 | 73045147 | 73045362 |
| chr12 | 73045362 | 73045592 |
| chr12 | 73045680 | 73045884 |
| chr12 | 73045884 | 73046084 |
| chr12 | 73046084 | 73046302 |
| chr12 | 73046309 | 73046611 |
| chr12 | 73046611 | 73047097 |
| chr12 | 73053580 | 73053860 |
| chr12 | 73053860 | 73054246 |
| chr12 | 73088656 | 73088812 |
| chr12 | 73088929 | 73089207 |

|       |          |          |
|-------|----------|----------|
| chr12 | 73098641 | 73098848 |
| chr12 | 73111607 | 73111779 |
| chr12 | 73111879 | 73112149 |
| chr12 | 73112170 | 73112320 |
| chr12 | 73112392 | 73112758 |
| chr12 | 73112758 | 73113193 |
| chr12 | 73113193 | 73113682 |
| chr12 | 73123238 | 73123390 |
| chr12 | 73123548 | 73123842 |
| chr12 | 73123842 | 73124105 |
| chr12 | 73124483 | 73124665 |
| chr12 | 73125378 | 73125535 |
| chr12 | 73140779 | 73141044 |
| chr12 | 73146925 | 73147119 |
| chr12 | 73147138 | 73147637 |
| chr12 | 73206318 | 73206608 |
| chr12 | 73228917 | 73229331 |
| chr12 | 73229394 | 73229700 |
| chr12 | 73230072 | 73230286 |
| chr12 | 73230286 | 73230565 |
| chr12 | 73233232 | 73233385 |
| chr12 | 73265605 | 73265856 |
| chr12 | 73286394 | 73286622 |
| chr12 | 73286622 | 73286975 |
| chr12 | 73286975 | 73287356 |
| chr12 | 73294931 | 73295241 |
| chr12 | 73295241 | 73295565 |
| chr12 | 73295565 | 73296057 |
| chr12 | 73296222 | 73296380 |
| chr12 | 73307656 | 73308141 |
| chr12 | 73324824 | 73325077 |
| chr12 | 73325610 | 73325960 |
| chr12 | 73344465 | 73344673 |
| chr12 | 73356903 | 73357055 |
| chr12 | 73367202 | 73367531 |
| chr12 | 73371214 | 73371471 |
| chr12 | 73378107 | 73378382 |
| chr12 | 73378702 | 73379039 |
| chr12 | 73382925 | 73383249 |
| chr12 | 73383249 | 73383816 |
| chr12 | 73384788 | 73384997 |
| chr12 | 73399426 | 73399802 |

|       |          |          |
|-------|----------|----------|
| chr12 | 73416140 | 73416442 |
| chr12 | 73416442 | 73416977 |
| chr12 | 73428879 | 73429089 |
| chr12 | 73433894 | 73434113 |
| chr12 | 73434113 | 73434383 |
| chr12 | 73448987 | 73449539 |
| chr12 | 73449539 | 73449807 |
| chr12 | 73462131 | 73462400 |
| chr12 | 73517055 | 73517210 |
| chr12 | 73517433 | 73517657 |
| chr12 | 73517883 | 73518077 |
| chr12 | 73528197 | 73528477 |
| chr12 | 73531918 | 73532342 |
| chr12 | 73534747 | 73534902 |
| chr12 | 73537788 | 73538167 |
| chr12 | 73545735 | 73546023 |
| chr12 | 73546023 | 73546339 |
| chr12 | 73546339 | 73546795 |
| chr12 | 73547801 | 73547955 |
| chr12 | 73554173 | 73554544 |
| chr12 | 73562949 | 73563286 |
| chr12 | 73583931 | 73584092 |
| chr12 | 73584209 | 73584892 |
| chr12 | 73584892 | 73585251 |
| chr12 | 73585251 | 73585550 |
| chr12 | 73585550 | 73585763 |
| chr12 | 73585868 | 73586071 |
| chr12 | 73610698 | 73611255 |
| chr12 | 73615002 | 73615196 |
| chr12 | 73616607 | 73616787 |
| chr12 | 73616813 | 73617144 |
| chr12 | 73617462 | 73618146 |
| chr12 | 73618775 | 73618955 |
| chr12 | 73663251 | 73663924 |
| chr12 | 73664012 | 73664181 |
| chr12 | 73667667 | 73667850 |
| chr12 | 73669231 | 73669507 |
| chr12 | 73687365 | 73687887 |
| chr12 | 73692356 | 73692665 |
| chr12 | 73693415 | 73693741 |
| chr12 | 73705367 | 73705628 |
| chr12 | 73708853 | 73709245 |

|       |          |          |
|-------|----------|----------|
| chr12 | 73719977 | 73720140 |
| chr12 | 73725716 | 73726172 |
| chr12 | 73726365 | 73726515 |
| chr12 | 73746097 | 73746334 |
| chr12 | 73755545 | 73755934 |
| chr12 | 73755934 | 73756222 |
| chr12 | 73764580 | 73764882 |
| chr12 | 73776601 | 73776839 |
| chr12 | 73777776 | 73778045 |
| chr12 | 73779212 | 73779563 |
| chr12 | 73779563 | 73779851 |
| chr12 | 73779851 | 73780214 |
| chr12 | 73790382 | 73791152 |
| chr12 | 73791165 | 73791380 |
| chr12 | 73794167 | 73794448 |
| chr12 | 73802643 | 73802985 |
| chr12 | 73807833 | 73808010 |
| chr12 | 73809987 | 73810303 |
| chr12 | 73810422 | 73810670 |
| chr12 | 73814958 | 73815189 |
| chr12 | 73818779 | 73819287 |
| chr12 | 73819347 | 73819597 |
| chr12 | 73824995 | 73825282 |
| chr12 | 73838462 | 73838750 |
| chr12 | 73842090 | 73842469 |
| chr12 | 73842469 | 73842774 |
| chr12 | 73846668 | 73847004 |
| chr12 | 73867784 | 73867995 |
| chr12 | 73873883 | 73874110 |
| chr12 | 73880272 | 73880756 |
| chr12 | 73887877 | 73888351 |
| chr12 | 73888351 | 73888819 |
| chr12 | 73888832 | 73889076 |
| chr12 | 73894716 | 73895314 |
| chr12 | 73901141 | 73901501 |
| chr12 | 73907427 | 73907669 |
| chr12 | 73907669 | 73907903 |
| chr12 | 73907903 | 73908305 |
| chr12 | 73908392 | 73908718 |
| chr12 | 73931409 | 73931563 |
| chr12 | 73949694 | 73950063 |
| chr12 | 73955978 | 73956535 |



|       |          |          |
|-------|----------|----------|
| chr12 | 73961825 | 73962203 |
| chr12 | 73964276 | 73964639 |
| chr12 | 73964639 | 73964966 |
| chr12 | 73965011 | 73965182 |
| chr12 | 73967649 | 73967889 |
| chr12 | 73974597 | 73974978 |
| chr12 | 73981290 | 73981499 |
| chr12 | 73982588 | 73982856 |
| chr12 | 73989694 | 73989925 |
| chr12 | 73997547 | 73997726 |
| chr12 | 74009439 | 74009706 |
| chr12 | 74011918 | 74012206 |
| chr12 | 74013794 | 74014086 |
| chr12 | 74014819 | 74015038 |
| chr12 | 74055746 | 74055984 |
| chr12 | 74056139 | 74056526 |
| chr12 | 74075636 | 74075980 |
| chr12 | 74076005 | 74076171 |
| chr12 | 74076174 | 74076417 |
| chr12 | 74078056 | 74078277 |
| chr12 | 74093021 | 74093555 |
| chr12 | 74093928 | 74094194 |
| chr12 | 74094765 | 74095140 |
| chr12 | 74141934 | 74142156 |
| chr12 | 74142211 | 74142407 |
| chr12 | 74143755 | 74143980 |
| chr12 | 74160734 | 74161415 |
| chr12 | 74173201 | 74173684 |
| chr12 | 74192527 | 74193014 |
| chr12 | 74211976 | 74212196 |
| chr12 | 74212229 | 74212493 |
| chr12 | 74219143 | 74219348 |
| chr12 | 74220694 | 74220987 |
| chr12 | 74238678 | 74239168 |
| chr12 | 74283847 | 74284624 |
| chr12 | 74284803 | 74285021 |
| chr12 | 74293752 | 74293902 |
| chr12 | 74316744 | 74317028 |
| chr12 | 74317028 | 74317420 |
| chr12 | 74317492 | 74317665 |
| chr12 | 74320398 | 74320628 |
| chr12 | 74333085 | 74333319 |

|       |          |          |
|-------|----------|----------|
| chr12 | 74430940 | 74431090 |
| chr12 | 74477629 | 74477966 |
| chr12 | 74488980 | 74489131 |
| chr12 | 74490717 | 74490917 |
| chr12 | 74523906 | 74524384 |
| chr12 | 74535971 | 74536276 |
| chr12 | 74536276 | 74536815 |
| chr12 | 74747411 | 74747635 |
| chr12 | 74753410 | 74753616 |
| chr12 | 74803850 | 74804025 |
| chr12 | 74804169 | 74804554 |
| chr12 | 74807710 | 74807903 |
| chr12 | 74824756 | 74825061 |
| chr12 | 74825061 | 74825577 |
| chr12 | 74854357 | 74854546 |
| chr12 | 75034565 | 75034854 |
| chr12 | 75042025 | 75042214 |
| chr12 | 75053797 | 75054052 |
| chr12 | 75061354 | 75061620 |
| chr12 | 75171114 | 75171285 |
| chr12 | 75176685 | 75176862 |
| chr12 | 75182755 | 75182905 |
| chr12 | 75283139 | 75283374 |
| chr12 | 75283374 | 75283614 |
| chr12 | 75307918 | 75308151 |
| chr12 | 75308151 | 75308367 |
| chr12 | 75308618 | 75308867 |
| chr12 | 75389500 | 75389653 |
| chr12 | 75425924 | 75426231 |
| chr12 | 75453090 | 75453284 |
| chr12 | 75464112 | 75464293 |
| chr12 | 75486962 | 75487258 |
| chr12 | 75487329 | 75487530 |
| chr12 | 75487608 | 75487766 |
| chr12 | 75528432 | 75528583 |
| chr12 | 75528814 | 75529332 |
| chr12 | 75529332 | 75529787 |
| chr12 | 75531486 | 75531702 |
| chr12 | 75531740 | 75532318 |
| chr12 | 75544334 | 75544611 |
| chr12 | 75544698 | 75545028 |
| chr12 | 75545862 | 75546199 |

|       |          |          |
|-------|----------|----------|
| chr12 | 75546199 | 75546517 |
| chr12 | 75555003 | 75555292 |
| chr12 | 75555292 | 75555518 |
| chr12 | 75555665 | 75555915 |
| chr12 | 75557855 | 75558314 |
| chr12 | 75558372 | 75558718 |
| chr12 | 75559239 | 75559476 |
| chr12 | 75561040 | 75561250 |
| chr12 | 75564591 | 75564778 |
| chr12 | 75572348 | 75572581 |
| chr12 | 75573226 | 75573376 |
| chr12 | 75573683 | 75573901 |
| chr12 | 75573974 | 75574250 |
| chr12 | 75595458 | 75595646 |
| chr12 | 75595682 | 75595904 |
| chr12 | 75595904 | 75596182 |
| chr12 | 75596182 | 75596944 |
| chr12 | 75645948 | 75646105 |
| chr12 | 75656685 | 75656873 |
| chr12 | 75659519 | 75659712 |
| chr12 | 75659712 | 75659941 |
| chr12 | 75668956 | 75669339 |
| chr12 | 75669339 | 75670179 |
| chr12 | 75682895 | 75683228 |
| chr12 | 75701124 | 75701331 |
| chr12 | 75702158 | 75702459 |
| chr12 | 75702459 | 75702769 |
| chr12 | 75702769 | 75703112 |
| chr12 | 75703112 | 75703360 |
| chr12 | 75734241 | 75734433 |
| chr12 | 75734836 | 75735151 |
| chr12 | 75735151 | 75735521 |
| chr12 | 75735521 | 75735919 |
| chr12 | 75747772 | 75748025 |
| chr12 | 75772712 | 75772907 |
| chr12 | 75786752 | 75787009 |
| chr12 | 75796589 | 75796818 |
| chr12 | 75817955 | 75818423 |
| chr12 | 75818423 | 75818672 |
| chr12 | 75818672 | 75819088 |
| chr12 | 75819170 | 75819478 |
| chr12 | 75820180 | 75820701 |

|       |          |          |
|-------|----------|----------|
| chr12 | 75826758 | 75826955 |
| chr12 | 75826976 | 75827546 |
| chr12 | 75827550 | 75827800 |
| chr12 | 75827800 | 75828108 |
| chr12 | 75828108 | 75828342 |
| chr12 | 75828342 | 75828497 |
| chr12 | 75833314 | 75833487 |
| chr12 | 75833602 | 75833785 |
| chr12 | 75833785 | 75833979 |
| chr12 | 75834009 | 75834200 |
| chr12 | 75834321 | 75834608 |
| chr12 | 75843244 | 75843465 |
| chr12 | 75843640 | 75843794 |
| chr12 | 75852465 | 75852748 |
| chr12 | 75853025 | 75853177 |
| chr12 | 75853277 | 75853651 |
| chr12 | 75853706 | 75853920 |
| chr12 | 75856260 | 75856410 |
| chr12 | 75856468 | 75857062 |
| chr12 | 75864834 | 75865051 |
| chr12 | 75865051 | 75865286 |
| chr12 | 75865286 | 75865559 |
| chr12 | 75866820 | 75866995 |
| chr12 | 75867001 | 75867303 |
| chr12 | 75867303 | 75867554 |
| chr12 | 75876995 | 75877163 |
| chr12 | 75893495 | 75893754 |
| chr12 | 75913227 | 75913497 |
| chr12 | 75919020 | 75919230 |
| chr12 | 75927695 | 75928010 |
| chr12 | 75935041 | 75935227 |
| chr12 | 75951437 | 75951643 |
| chr12 | 75976395 | 75976608 |
| chr12 | 75978933 | 75979710 |
| chr12 | 75990816 | 75991090 |
| chr12 | 75992196 | 75992526 |
| chr12 | 75992526 | 75992821 |
| chr12 | 76004283 | 76004460 |
| chr12 | 76004639 | 76004981 |
| chr12 | 76004981 | 76005309 |
| chr12 | 76013507 | 76013844 |
| chr12 | 76013943 | 76014149 |

|       |          |          |
|-------|----------|----------|
| chr12 | 76015001 | 76015351 |
| chr12 | 76015541 | 76016019 |
| chr12 | 76016019 | 76016617 |
| chr12 | 76016702 | 76016947 |
| chr12 | 76042390 | 76042540 |
| chr12 | 76043333 | 76043647 |
| chr12 | 76063086 | 76063293 |
| chr12 | 76063646 | 76063799 |
| chr12 | 76083012 | 76083179 |
| chr12 | 76083997 | 76084249 |
| chr12 | 76085038 | 76085711 |
| chr12 | 76090257 | 76090557 |
| chr12 | 76104148 | 76104423 |
| chr12 | 76115721 | 76115985 |
| chr12 | 76164219 | 76164400 |
| chr12 | 76176956 | 76177215 |
| chr12 | 76177224 | 76177520 |
| chr12 | 76177895 | 76178151 |
| chr12 | 76179147 | 76179446 |
| chr12 | 76179667 | 76179856 |
| chr12 | 76179865 | 76180127 |
| chr12 | 76180127 | 76180377 |
| chr12 | 76187923 | 76188164 |
| chr12 | 76190218 | 76190391 |
| chr12 | 76190949 | 76191317 |
| chr12 | 76195887 | 76196372 |
| chr12 | 76196372 | 76196669 |
| chr12 | 76196669 | 76196943 |
| chr12 | 76230684 | 76230886 |
| chr12 | 76249997 | 76250151 |
| chr12 | 76254858 | 76255501 |
| chr12 | 76255501 | 76255864 |
| chr12 | 76256154 | 76256326 |
| chr12 | 76266889 | 76267150 |
| chr12 | 76293282 | 76293542 |
| chr12 | 76303518 | 76303807 |
| chr12 | 76308134 | 76308305 |
| chr12 | 76311729 | 76312445 |
| chr12 | 76318216 | 76318595 |
| chr12 | 76318595 | 76318989 |
| chr12 | 76318989 | 76319332 |
| chr12 | 76323801 | 76324039 |

|       |          |          |
|-------|----------|----------|
| chr12 | 76324624 | 76324966 |
| chr12 | 76324966 | 76325249 |
| chr12 | 76341191 | 76341355 |
| chr12 | 76345918 | 76346068 |
| chr12 | 76369003 | 76369300 |
| chr12 | 76369300 | 76369854 |
| chr12 | 76369900 | 76370264 |
| chr12 | 76370264 | 76370648 |
| chr12 | 76370648 | 76370879 |
| chr12 | 76370976 | 76371227 |
| chr12 | 76371334 | 76371500 |
| chr12 | 76376557 | 76377015 |
| chr12 | 76403460 | 76403648 |
| chr12 | 76403648 | 76403913 |
| chr12 | 76403913 | 76404172 |
| chr12 | 76404172 | 76404727 |
| chr12 | 76409293 | 76409505 |
| chr12 | 76417427 | 76417673 |
| chr12 | 76417673 | 76417893 |
| chr12 | 76435698 | 76435869 |
| chr12 | 76458879 | 76459645 |
| chr12 | 76463411 | 76463724 |
| chr12 | 76463758 | 76464009 |
| chr12 | 76467126 | 76467347 |
| chr12 | 76467347 | 76467634 |
| chr12 | 76472100 | 76472410 |
| chr12 | 76474307 | 76474500 |
| chr12 | 76476273 | 76476423 |
| chr12 | 76479313 | 76479505 |
| chr12 | 76479808 | 76480609 |
| chr12 | 76484666 | 76484821 |
| chr12 | 76493398 | 76493980 |
| chr12 | 76496160 | 76496328 |
| chr12 | 76496380 | 76496751 |
| chr12 | 76500883 | 76501336 |
| chr12 | 76513564 | 76513722 |
| chr12 | 76528942 | 76529183 |
| chr12 | 76530869 | 76531081 |
| chr12 | 76532089 | 76532254 |
| chr12 | 76532980 | 76533324 |
| chr12 | 76533324 | 76533685 |
| chr12 | 76533690 | 76534157 |

|       |          |          |
|-------|----------|----------|
| chr12 | 76536813 | 76537103 |
| chr12 | 76537428 | 76537794 |
| chr12 | 76540701 | 76541063 |
| chr12 | 76541063 | 76541332 |
| chr12 | 76546029 | 76546244 |
| chr12 | 76546273 | 76546603 |
| chr12 | 76546603 | 76546814 |
| chr12 | 76547008 | 76547337 |
| chr12 | 76547337 | 76547618 |
| chr12 | 76547618 | 76547862 |
| chr12 | 76547862 | 76548246 |
| chr12 | 76552172 | 76552850 |
| chr12 | 76558185 | 76558638 |
| chr12 | 76561743 | 76562231 |
| chr12 | 76562231 | 76562516 |
| chr12 | 76563264 | 76563482 |
| chr12 | 76563482 | 76563870 |
| chr12 | 76571147 | 76571583 |
| chr12 | 76578470 | 76578674 |
| chr12 | 76579764 | 76580151 |
| chr12 | 76582169 | 76582346 |
| chr12 | 76582962 | 76583168 |
| chr12 | 76585127 | 76585334 |
| chr12 | 76593597 | 76593833 |
| chr12 | 76593833 | 76594098 |
| chr12 | 76594098 | 76594359 |
| chr12 | 76594394 | 76594603 |
| chr12 | 76596402 | 76596678 |
| chr12 | 76600934 | 76601121 |
| chr12 | 76601508 | 76601696 |
| chr12 | 76603722 | 76604070 |
| chr12 | 76613774 | 76613910 |
| chr12 | 76613910 | 76614071 |
| chr12 | 76614167 | 76614327 |
| chr12 | 76635166 | 76635371 |
| chr12 | 76640612 | 76641093 |
| chr12 | 76650096 | 76650378 |
| chr12 | 76666610 | 76666937 |
| chr12 | 76666937 | 76667319 |
| chr12 | 76669366 | 76669516 |
| chr12 | 76669750 | 76669916 |
| chr12 | 76682033 | 76682331 |

|       |          |          |
|-------|----------|----------|
| chr12 | 76695191 | 76695341 |
| chr12 | 76709362 | 76709547 |
| chr12 | 76709658 | 76710072 |
| chr12 | 76710072 | 76710423 |
| chr12 | 76710423 | 76710977 |
| chr12 | 76752703 | 76752994 |
| chr12 | 76765356 | 76765637 |
| chr12 | 76765637 | 76765965 |
| chr12 | 76793795 | 76793956 |
| chr12 | 76795027 | 76795757 |
| chr12 | 76803455 | 76803652 |
| chr12 | 76803906 | 76804222 |
| chr12 | 76805107 | 76805398 |
| chr12 | 76805468 | 76805750 |
| chr12 | 76805750 | 76806119 |
| chr12 | 76809892 | 76810169 |
| chr12 | 76813723 | 76813959 |
| chr12 | 76817552 | 76817776 |
| chr12 | 76818108 | 76818453 |
| chr12 | 76821981 | 76822297 |
| chr12 | 76822297 | 76822750 |
| chr12 | 76837211 | 76837536 |
| chr12 | 76837536 | 76838099 |
| chr12 | 76863572 | 76864084 |
| chr12 | 76867675 | 76867939 |
| chr12 | 76879343 | 76879587 |
| chr12 | 76883904 | 76884221 |
| chr12 | 76918178 | 76918414 |
| chr12 | 76920484 | 76920734 |
| chr12 | 76920734 | 76921011 |
| chr12 | 76921106 | 76921310 |
| chr12 | 76926683 | 76926953 |
| chr12 | 76927004 | 76927418 |
| chr12 | 76927418 | 76927869 |
| chr12 | 76941700 | 76941878 |
| chr12 | 76961509 | 76961727 |
| chr12 | 76961727 | 76962091 |
| chr12 | 76962091 | 76962527 |
| chr12 | 76962527 | 76962808 |
| chr12 | 76981346 | 76981699 |
| chr12 | 76981699 | 76982023 |
| chr12 | 76982023 | 76982389 |



|       |          |          |
|-------|----------|----------|
| chr12 | 76999687 | 76999971 |
| chr12 | 77000110 | 77000401 |
| chr12 | 77000433 | 77000674 |
| chr12 | 77000674 | 77000995 |
| chr12 | 77001092 | 77001293 |
| chr12 | 77010554 | 77010746 |
| chr12 | 77019236 | 77019472 |
| chr12 | 77019625 | 77019986 |
| chr12 | 77019996 | 77020495 |
| chr12 | 77022049 | 77022293 |
| chr12 | 77025524 | 77026026 |
| chr12 | 77026565 | 77026732 |
| chr12 | 77032629 | 77032860 |
| chr12 | 77039987 | 77040194 |
| chr12 | 77045172 | 77045668 |
| chr12 | 77045992 | 77046259 |
| chr12 | 77052802 | 77053089 |
| chr12 | 77078849 | 77078999 |
| chr12 | 77079331 | 77080034 |
| chr12 | 77085254 | 77085660 |
| chr12 | 77085884 | 77086268 |
| chr12 | 77092845 | 77093261 |
| chr12 | 77099414 | 77100001 |
| chr12 | 77130483 | 77130960 |
| chr12 | 77131183 | 77131399 |
| chr12 | 77131399 | 77131705 |
| chr12 | 77131769 | 77131931 |
| chr12 | 77138744 | 77139314 |
| chr12 | 77139685 | 77140174 |
| chr12 | 77147390 | 77147550 |
| chr12 | 77168645 | 77168901 |
| chr12 | 77168901 | 77169238 |
| chr12 | 77170322 | 77170489 |
| chr12 | 77179401 | 77179777 |
| chr12 | 77179968 | 77180206 |
| chr12 | 77190763 | 77191124 |
| chr12 | 77193413 | 77193563 |
| chr12 | 77195007 | 77195464 |
| chr12 | 77197030 | 77197265 |
| chr12 | 77211904 | 77212201 |
| chr12 | 77216513 | 77216897 |
| chr12 | 77216897 | 77217235 |

|       |          |          |
|-------|----------|----------|
| chr12 | 77223604 | 77224143 |
| chr12 | 77237861 | 77238257 |
| chr12 | 77238257 | 77238567 |
| chr12 | 77238567 | 77238841 |
| chr12 | 77238841 | 77239139 |
| chr12 | 77239139 | 77239410 |
| chr12 | 77239626 | 77239888 |
| chr12 | 77252940 | 77253122 |
| chr12 | 77263879 | 77264113 |
| chr12 | 77425173 | 77425344 |
| chr12 | 77531378 | 77531536 |
| chr12 | 77568422 | 77568596 |
| chr12 | 77579846 | 77580007 |
| chr12 | 77647530 | 77647891 |
| chr12 | 77647891 | 77648181 |
| chr12 | 77667911 | 77668061 |
| chr12 | 77674888 | 77675051 |
| chr12 | 77781468 | 77781702 |
| chr12 | 77852677 | 77853010 |
| chr12 | 77887408 | 77887708 |
| chr12 | 77899126 | 77899324 |
| chr12 | 77948932 | 77949504 |
| chr12 | 77949504 | 77950154 |
| chr12 | 77956939 | 77957422 |
| chr12 | 77959224 | 77959374 |
| chr12 | 77962512 | 77963102 |
| chr12 | 77969208 | 77969358 |
| chr12 | 77969419 | 77969626 |
| chr12 | 77969962 | 77970376 |
| chr12 | 77971642 | 77971837 |
| chr12 | 77972232 | 77972522 |
| chr12 | 77980073 | 77980311 |
| chr12 | 77985152 | 77985361 |
| chr12 | 78000512 | 78000672 |
| chr12 | 78056040 | 78056303 |
| chr12 | 78089755 | 78089985 |
| chr12 | 78099879 | 78100121 |
| chr12 | 78119365 | 78119552 |
| chr12 | 78205910 | 78206148 |
| chr12 | 78225731 | 78226084 |
| chr12 | 78226084 | 78226484 |
| chr12 | 78226484 | 78226927 |

|       |          |          |
|-------|----------|----------|
| chr12 | 78227070 | 78227288 |
| chr12 | 78227288 | 78227504 |
| chr12 | 78332198 | 78332390 |
| chr12 | 78350799 | 78351245 |
| chr12 | 78365297 | 78365463 |
| chr12 | 78471500 | 78471668 |
| chr12 | 78483614 | 78483871 |
| chr12 | 78526096 | 78526387 |
| chr12 | 78526416 | 78526688 |
| chr12 | 78635777 | 78636070 |
| chr12 | 78636070 | 78636383 |
| chr12 | 78640074 | 78640476 |
| chr12 | 78641353 | 78641832 |
| chr12 | 78661806 | 78662137 |
| chr12 | 78662912 | 78663094 |
| chr12 | 78678886 | 78679067 |
| chr12 | 78682291 | 78682629 |
| chr12 | 78682629 | 78682930 |
| chr12 | 78723850 | 78724485 |
| chr12 | 78739797 | 78740045 |
| chr12 | 78740131 | 78740657 |
| chr12 | 78748539 | 78749026 |
| chr12 | 78749026 | 78749385 |
| chr12 | 78749385 | 78749646 |
| chr12 | 78749646 | 78749866 |
| chr12 | 78768917 | 78769134 |
| chr12 | 78769134 | 78769380 |
| chr12 | 78769380 | 78769651 |
| chr12 | 78860861 | 78861223 |
| chr12 | 78861231 | 78861883 |
| chr12 | 78861883 | 78862178 |
| chr12 | 78862178 | 78862446 |
| chr12 | 78868217 | 78868481 |
| chr12 | 78874697 | 78874915 |
| chr12 | 78875515 | 78875704 |
| chr12 | 78891244 | 78891449 |
| chr12 | 78906700 | 78907204 |
| chr12 | 78907594 | 78907803 |
| chr12 | 78908073 | 78908602 |
| chr12 | 78910283 | 78910529 |
| chr12 | 78910722 | 78911007 |
| chr12 | 78911091 | 78911282 |

|       |          |          |
|-------|----------|----------|
| chr12 | 78914428 | 78914790 |
| chr12 | 78918256 | 78918577 |
| chr12 | 78918579 | 78918734 |
| chr12 | 78919356 | 78919701 |
| chr12 | 78925972 | 78926269 |
| chr12 | 78928840 | 78929005 |
| chr12 | 78929418 | 78929640 |
| chr12 | 78929971 | 78930259 |
| chr12 | 78940096 | 78940613 |
| chr12 | 78940809 | 78941092 |
| chr12 | 78941092 | 78941522 |
| chr12 | 78947271 | 78947469 |
| chr12 | 78952059 | 78952337 |
| chr12 | 78953363 | 78953801 |
| chr12 | 78953872 | 78954484 |
| chr12 | 78954510 | 78954753 |
| chr12 | 78957811 | 78957961 |
| chr12 | 78960389 | 78960625 |
| chr12 | 78980857 | 78981020 |
| chr12 | 78981331 | 78981526 |
| chr12 | 78981843 | 78982246 |
| chr12 | 78982246 | 78982521 |
| chr12 | 78987890 | 78988078 |
| chr12 | 78992394 | 78992908 |
| chr12 | 79006471 | 79006803 |
| chr12 | 79006803 | 79007173 |
| chr12 | 79007173 | 79007640 |
| chr12 | 79022906 | 79023187 |
| chr12 | 79023187 | 79023445 |
| chr12 | 79028756 | 79029334 |
| chr12 | 79029334 | 79029868 |
| chr12 | 79033790 | 79034037 |
| chr12 | 79038752 | 79038986 |
| chr12 | 79039657 | 79040132 |
| chr12 | 79041437 | 79041764 |
| chr12 | 79046992 | 79047236 |
| chr12 | 79047236 | 79047764 |
| chr12 | 79050579 | 79050803 |
| chr12 | 79055317 | 79055645 |
| chr12 | 79089109 | 79089579 |
| chr12 | 79089579 | 79089855 |
| chr12 | 79092573 | 79093003 |

|       |          |          |
|-------|----------|----------|
| chr12 | 79097479 | 79097631 |
| chr12 | 79103772 | 79104076 |
| chr12 | 79122901 | 79123119 |
| chr12 | 79130382 | 79131205 |
| chr12 | 79132088 | 79132508 |
| chr12 | 79171967 | 79172292 |
| chr12 | 79172292 | 79172600 |
| chr12 | 79172600 | 79173009 |
| chr12 | 79181438 | 79181601 |
| chr12 | 79190846 | 79191165 |
| chr12 | 79191165 | 79191392 |
| chr12 | 79191392 | 79191728 |
| chr12 | 79191752 | 79192088 |
| chr12 | 79193586 | 79193751 |
| chr12 | 79206217 | 79206464 |
| chr12 | 79248025 | 79248534 |
| chr12 | 79250015 | 79250415 |
| chr12 | 79253225 | 79253660 |
| chr12 | 79254492 | 79254811 |
| chr12 | 79259490 | 79259691 |
| chr12 | 79295910 | 79296701 |
| chr12 | 79297155 | 79297404 |
| chr12 | 79297404 | 79297622 |
| chr12 | 79308017 | 79308260 |
| chr12 | 79330120 | 79330345 |
| chr12 | 79331710 | 79332045 |
| chr12 | 79332045 | 79332279 |
| chr12 | 79333950 | 79334160 |
| chr12 | 79347623 | 79348154 |
| chr12 | 79348920 | 79349104 |
| chr12 | 79352162 | 79352535 |
| chr12 | 79352535 | 79353055 |
| chr12 | 79354741 | 79354933 |
| chr12 | 79356865 | 79357020 |
| chr12 | 79358877 | 79359182 |
| chr12 | 79359476 | 79359719 |
| chr12 | 79383582 | 79383915 |
| chr12 | 79387067 | 79387329 |
| chr12 | 79387939 | 79388180 |
| chr12 | 79404128 | 79404281 |
| chr12 | 79404582 | 79404817 |
| chr12 | 79405175 | 79405351 |

|       |          |          |
|-------|----------|----------|
| chr12 | 79410422 | 79410572 |
| chr12 | 79419240 | 79419598 |
| chr12 | 79420752 | 79420904 |
| chr12 | 79426943 | 79427095 |
| chr12 | 79454109 | 79454265 |
| chr12 | 79471670 | 79471897 |
| chr12 | 79471897 | 79472549 |
| chr12 | 79477369 | 79477549 |
| chr12 | 79481996 | 79482351 |
| chr12 | 79488651 | 79489287 |
| chr12 | 79493587 | 79493737 |
| chr12 | 79501916 | 79502203 |
| chr12 | 79504012 | 79504473 |
| chr12 | 79507078 | 79507425 |
| chr12 | 79507464 | 79507614 |
| chr12 | 79514708 | 79515044 |
| chr12 | 79524570 | 79524835 |
| chr12 | 79527274 | 79527579 |
| chr12 | 79531704 | 79532287 |
| chr12 | 79532287 | 79532774 |
| chr12 | 79534839 | 79535301 |
| chr12 | 79541516 | 79542005 |
| chr12 | 79545114 | 79545416 |
| chr12 | 79545927 | 79546124 |
| chr12 | 79547572 | 79547765 |
| chr12 | 79551389 | 79551548 |
| chr12 | 79551887 | 79552597 |
| chr12 | 79552656 | 79552878 |
| chr12 | 79553130 | 79553447 |
| chr12 | 79555184 | 79555445 |
| chr12 | 79558143 | 79558329 |
| chr12 | 79558854 | 79559079 |
| chr12 | 79559079 | 79559321 |
| chr12 | 79559374 | 79559933 |
| chr12 | 79560130 | 79560412 |
| chr12 | 79560957 | 79561332 |
| chr12 | 79598369 | 79598817 |
| chr12 | 79600098 | 79600330 |
| chr12 | 79600330 | 79600764 |
| chr12 | 79601082 | 79601386 |
| chr12 | 79611027 | 79611416 |
| chr12 | 79611433 | 79611583 |

|       |          |          |
|-------|----------|----------|
| chr12 | 79612749 | 79613185 |
| chr12 | 79639536 | 79639794 |
| chr12 | 79639794 | 79640058 |
| chr12 | 79641662 | 79641828 |
| chr12 | 79641979 | 79642378 |
| chr12 | 79645705 | 79646079 |
| chr12 | 79649033 | 79649428 |
| chr12 | 79676957 | 79677283 |
| chr12 | 79686984 | 79687283 |
| chr12 | 79711132 | 79711360 |
| chr12 | 79751815 | 79752011 |
| chr12 | 79793429 | 79793785 |
| chr12 | 79832723 | 79832893 |
| chr12 | 79864170 | 79864470 |
| chr12 | 79864470 | 79864760 |
| chr12 | 79864760 | 79865183 |
| chr12 | 79865201 | 79865368 |
| chr12 | 79874247 | 79874542 |
| chr12 | 79874542 | 79874791 |
| chr12 | 79896006 | 79896385 |
| chr12 | 79904299 | 79904544 |
| chr12 | 79904891 | 79905273 |
| chr12 | 79907082 | 79907381 |
| chr12 | 79907398 | 79907687 |
| chr12 | 79907687 | 79908106 |
| chr12 | 79919083 | 79919555 |
| chr12 | 79929773 | 79930354 |
| chr12 | 79936619 | 79937012 |
| chr12 | 79937012 | 79937304 |
| chr12 | 79950627 | 79951118 |
| chr12 | 79954950 | 79955134 |
| chr12 | 79970965 | 79971291 |
| chr12 | 79975922 | 79976204 |
| chr12 | 79990412 | 79991072 |
| chr12 | 79995455 | 79995750 |
| chr12 | 79997036 | 79997186 |
| chr12 | 79997296 | 79997449 |
| chr12 | 79997943 | 79998118 |
| chr12 | 80001951 | 80002221 |
| chr12 | 80026127 | 80026813 |
| chr12 | 80032336 | 80032846 |
| chr12 | 80032846 | 80033142 |

|       |          |          |
|-------|----------|----------|
| chr12 | 80036378 | 80036603 |
| chr12 | 80036603 | 80036798 |
| chr12 | 80046641 | 80047095 |
| chr12 | 80048630 | 80049054 |
| chr12 | 80079909 | 80080353 |
| chr12 | 80083896 | 80084259 |
| chr12 | 80090770 | 80091408 |
| chr12 | 80091408 | 80091654 |
| chr12 | 80091654 | 80091883 |
| chr12 | 80092816 | 80093042 |
| chr12 | 80098863 | 80099214 |
| chr12 | 80103205 | 80103503 |
| chr12 | 80103503 | 80103808 |
| chr12 | 80103808 | 80104284 |
| chr12 | 80109002 | 80109275 |
| chr12 | 80109847 | 80110012 |
| chr12 | 80112832 | 80113234 |
| chr12 | 80113294 | 80113475 |
| chr12 | 80113543 | 80113720 |
| chr12 | 80114296 | 80114683 |
| chr12 | 80115155 | 80115356 |
| chr12 | 80115406 | 80115622 |
| chr12 | 80115622 | 80116086 |
| chr12 | 80116192 | 80116342 |
| chr12 | 80127111 | 80127384 |
| chr12 | 80127384 | 80127686 |
| chr12 | 80130621 | 80130926 |
| chr12 | 80132101 | 80132285 |
| chr12 | 80132285 | 80132618 |
| chr12 | 80132618 | 80133071 |
| chr12 | 80133076 | 80133226 |
| chr12 | 80140890 | 80141454 |
| chr12 | 80141454 | 80141827 |
| chr12 | 80146502 | 80146775 |
| chr12 | 80149605 | 80149797 |
| chr12 | 80154036 | 80154292 |
| chr12 | 80157799 | 80157949 |
| chr12 | 80158738 | 80159169 |
| chr12 | 80159169 | 80159571 |
| chr12 | 80160120 | 80160292 |
| chr12 | 80161031 | 80161248 |
| chr12 | 80161678 | 80161873 |



|       |          |          |
|-------|----------|----------|
| chr12 | 80162555 | 80162756 |
| chr12 | 80164447 | 80164953 |
| chr12 | 80171026 | 80171368 |
| chr12 | 80177034 | 80177217 |
| chr12 | 80177217 | 80177377 |
| chr12 | 80177377 | 80177529 |
| chr12 | 80177529 | 80177723 |
| chr12 | 80183921 | 80184454 |
| chr12 | 80185317 | 80185569 |
| chr12 | 80189306 | 80189530 |
| chr12 | 80190917 | 80191075 |
| chr12 | 80191273 | 80191465 |
| chr12 | 80191465 | 80191654 |
| chr12 | 80197450 | 80197691 |
| chr12 | 80198575 | 80199005 |
| chr12 | 80199048 | 80199448 |
| chr12 | 80203517 | 80203669 |
| chr12 | 80209675 | 80209975 |
| chr12 | 80209975 | 80210357 |
| chr12 | 80210357 | 80210709 |
| chr12 | 80210918 | 80211103 |
| chr12 | 80211103 | 80211288 |
| chr12 | 80211360 | 80211544 |
| chr12 | 80216187 | 80216355 |
| chr12 | 80216492 | 80216743 |
| chr12 | 80220205 | 80220502 |
| chr12 | 80220502 | 80220925 |
| chr12 | 80223567 | 80224057 |
| chr12 | 80228527 | 80228867 |
| chr12 | 80228977 | 80229359 |
| chr12 | 80229359 | 80229827 |
| chr12 | 80230053 | 80230313 |
| chr12 | 80232184 | 80232375 |
| chr12 | 80233030 | 80233243 |
| chr12 | 80234255 | 80234644 |
| chr12 | 80234644 | 80234977 |
| chr12 | 80235388 | 80235660 |
| chr12 | 80239366 | 80239797 |
| chr12 | 80240595 | 80240745 |
| chr12 | 80244113 | 80244449 |
| chr12 | 80244685 | 80245094 |
| chr12 | 80246014 | 80246223 |

|       |          |          |
|-------|----------|----------|
| chr12 | 80246734 | 80247013 |
| chr12 | 80247053 | 80247388 |
| chr12 | 80251305 | 80251527 |
| chr12 | 80252138 | 80252315 |
| chr12 | 80253869 | 80254068 |
| chr12 | 80257114 | 80257270 |
| chr12 | 80259412 | 80259660 |
| chr12 | 80259671 | 80260203 |
| chr12 | 80260203 | 80260740 |
| chr12 | 80260740 | 80261085 |
| chr12 | 80268061 | 80268421 |
| chr12 | 80270594 | 80270947 |
| chr12 | 80270947 | 80271347 |
| chr12 | 80271914 | 80272173 |
| chr12 | 80272980 | 80273131 |
| chr12 | 80273307 | 80273661 |
| chr12 | 80276130 | 80276352 |
| chr12 | 80277204 | 80277921 |
| chr12 | 80279512 | 80279814 |
| chr12 | 80282496 | 80282727 |
| chr12 | 80284321 | 80284554 |
| chr12 | 80284835 | 80285035 |
| chr12 | 80291402 | 80292494 |
| chr12 | 80301098 | 80301361 |
| chr12 | 80315525 | 80315695 |
| chr12 | 80318912 | 80319489 |
| chr12 | 80329691 | 80330207 |
| chr12 | 80331707 | 80332141 |
| chr12 | 80344583 | 80345306 |
| chr12 | 80346532 | 80346687 |
| chr12 | 80351526 | 80351753 |
| chr12 | 80358522 | 80358809 |
| chr12 | 80358853 | 80359340 |
| chr12 | 80365967 | 80366219 |
| chr12 | 80366219 | 80366614 |
| chr12 | 80367414 | 80367587 |
| chr12 | 80368186 | 80368459 |
| chr12 | 80371989 | 80372269 |
| chr12 | 80374681 | 80375104 |
| chr12 | 80377700 | 80377901 |
| chr12 | 80379795 | 80380215 |
| chr12 | 80380215 | 80380782 |

|       |          |          |
|-------|----------|----------|
| chr12 | 80387361 | 80387615 |
| chr12 | 80389442 | 80389816 |
| chr12 | 80406734 | 80406992 |
| chr12 | 80407909 | 80408151 |
| chr12 | 80408357 | 80408664 |
| chr12 | 80433425 | 80433645 |
| chr12 | 80434725 | 80435105 |
| chr12 | 80435105 | 80435402 |
| chr12 | 80435402 | 80435730 |
| chr12 | 80435986 | 80436114 |
| chr12 | 80436114 | 80436267 |
| chr12 | 80436371 | 80436738 |
| chr12 | 80436738 | 80437025 |
| chr12 | 80438513 | 80438711 |
| chr12 | 80441359 | 80441514 |
| chr12 | 80462996 | 80463328 |
| chr12 | 80463328 | 80463747 |
| chr12 | 80518490 | 80518748 |
| chr12 | 80518748 | 80518966 |
| chr12 | 80519141 | 80519413 |
| chr12 | 80521934 | 80522289 |
| chr12 | 80538164 | 80538391 |
| chr12 | 80553371 | 80553522 |
| chr12 | 80577203 | 80577354 |
| chr12 | 80585051 | 80585270 |
| chr12 | 80602627 | 80602793 |
| chr12 | 80603308 | 80603632 |
| chr12 | 80603632 | 80603921 |
| chr12 | 80604886 | 80605069 |
| chr12 | 80608577 | 80608912 |
| chr12 | 80642715 | 80642970 |
| chr12 | 80643299 | 80643501 |
| chr12 | 80643501 | 80643723 |
| chr12 | 80643723 | 80644044 |
| chr12 | 80644071 | 80644339 |
| chr12 | 80644339 | 80644568 |
| chr12 | 80644614 | 80644764 |
| chr12 | 80673244 | 80673506 |
| chr12 | 80680701 | 80680943 |
| chr12 | 80681406 | 80681658 |
| chr12 | 80691839 | 80692001 |
| chr12 | 80692231 | 80693022 |

|       |          |          |
|-------|----------|----------|
| chr12 | 80698649 | 80698801 |
| chr12 | 80706674 | 80706888 |
| chr12 | 80707371 | 80707481 |
| chr12 | 80707481 | 80707526 |
| chr12 | 80724897 | 80725143 |
| chr12 | 80728936 | 80729112 |
| chr12 | 80730595 | 80730912 |
| chr12 | 80739627 | 80739795 |
| chr12 | 80751629 | 80751866 |
| chr12 | 80757717 | 80758127 |
| chr12 | 80758127 | 80758519 |
| chr12 | 80758519 | 80758938 |
| chr12 | 80758951 | 80759311 |
| chr12 | 80760381 | 80760604 |
| chr12 | 80760604 | 80760850 |
| chr12 | 80769651 | 80770104 |
| chr12 | 80773648 | 80773816 |
| chr12 | 80782275 | 80782451 |
| chr12 | 80782993 | 80783143 |
| chr12 | 80783936 | 80784165 |
| chr12 | 80790248 | 80790688 |
| chr12 | 80790688 | 80791184 |
| chr12 | 80800193 | 80800492 |
| chr12 | 80809613 | 80809902 |
| chr12 | 80813902 | 80814195 |
| chr12 | 80816813 | 80816963 |
| chr12 | 80818397 | 80818614 |
| chr12 | 80825971 | 80826350 |
| chr12 | 80832286 | 80832790 |
| chr12 | 80834173 | 80834546 |
| chr12 | 80834563 | 80834758 |
| chr12 | 80834780 | 80834930 |
| chr12 | 80854007 | 80854168 |
| chr12 | 80885240 | 80885638 |
| chr12 | 80893805 | 80894003 |
| chr12 | 80894063 | 80894260 |
| chr12 | 80894959 | 80895283 |
| chr12 | 80895283 | 80895563 |
| chr12 | 80917953 | 80918105 |
| chr12 | 80922836 | 80922986 |
| chr12 | 80930261 | 80930445 |
| chr12 | 80936814 | 80937051 |

|       |          |          |
|-------|----------|----------|
| chr12 | 80937690 | 80938116 |
| chr12 | 80939342 | 80939786 |
| chr12 | 80945089 | 80945249 |
| chr12 | 80945280 | 80945848 |
| chr12 | 80945848 | 80946411 |
| chr12 | 80951781 | 80951931 |
| chr12 | 80951946 | 80952128 |
| chr12 | 80952383 | 80952586 |
| chr12 | 80952586 | 80952847 |
| chr12 | 80954204 | 80954479 |
| chr12 | 80954769 | 80955029 |
| chr12 | 80958071 | 80958228 |
| chr12 | 80966344 | 80966520 |
| chr12 | 80982399 | 80982638 |
| chr12 | 80988382 | 80988611 |
| chr12 | 81027048 | 81027219 |
| chr12 | 81033806 | 81033987 |
| chr12 | 81097803 | 81097986 |
| chr12 | 81099220 | 81099448 |
| chr12 | 81108744 | 81108943 |
| chr12 | 81123914 | 81124086 |
| chr12 | 81124202 | 81124590 |
| chr12 | 81150999 | 81151275 |
| chr12 | 81155842 | 81155992 |
| chr12 | 81156863 | 81157162 |
| chr12 | 81163086 | 81163327 |
| chr12 | 81163327 | 81163551 |
| chr12 | 81182179 | 81182412 |
| chr12 | 81199625 | 81199904 |
| chr12 | 81237196 | 81237424 |
| chr12 | 81278656 | 81278846 |
| chr12 | 81332001 | 81332228 |
| chr12 | 81332228 | 81332450 |
| chr12 | 81332530 | 81332828 |
| chr12 | 81332828 | 81333153 |
| chr12 | 81402260 | 81402478 |
| chr12 | 81408983 | 81409336 |
| chr12 | 81438915 | 81439137 |
| chr12 | 81484711 | 81484979 |
| chr12 | 81484979 | 81485264 |
| chr12 | 81497083 | 81497269 |
| chr12 | 81532183 | 81532661 |

|       |          |          |
|-------|----------|----------|
| chr12 | 81532661 | 81533138 |
| chr12 | 81594881 | 81595534 |
| chr12 | 81607809 | 81608163 |
| chr12 | 81608513 | 81608675 |
| chr12 | 81616860 | 81617569 |
| chr12 | 81619121 | 81619389 |
| chr12 | 81619389 | 81619676 |
| chr12 | 81630435 | 81630931 |
| chr12 | 81630931 | 81631313 |
| chr12 | 81631313 | 81631656 |
| chr12 | 81631656 | 81632001 |
| chr12 | 81653376 | 81653612 |
| chr12 | 81668149 | 81668431 |
| chr12 | 81668431 | 81668810 |
| chr12 | 81683429 | 81683705 |
| chr12 | 81688462 | 81688971 |
| chr12 | 81690528 | 81690727 |
| chr12 | 81691177 | 81691708 |
| chr12 | 81691994 | 81692249 |
| chr12 | 81692313 | 81692494 |
| chr12 | 81697122 | 81697351 |
| chr12 | 81697864 | 81698451 |
| chr12 | 81698451 | 81698790 |
| chr12 | 81712034 | 81712215 |
| chr12 | 81712527 | 81713048 |
| chr12 | 81719044 | 81719426 |
| chr12 | 81728919 | 81729069 |
| chr12 | 81748101 | 81748748 |
| chr12 | 81748821 | 81749394 |
| chr12 | 81762500 | 81762660 |
| chr12 | 81779931 | 81780160 |
| chr12 | 81780650 | 81780810 |
| chr12 | 81780813 | 81781615 |
| chr12 | 81782693 | 81782874 |
| chr12 | 81783018 | 81783336 |
| chr12 | 81783336 | 81783714 |
| chr12 | 81788673 | 81789055 |
| chr12 | 81789634 | 81789827 |
| chr12 | 81790818 | 81791210 |
| chr12 | 81791210 | 81791528 |
| chr12 | 81796613 | 81796868 |
| chr12 | 81807280 | 81807513 |

|       |          |          |
|-------|----------|----------|
| chr12 | 81830430 | 81830757 |
| chr12 | 81831129 | 81831457 |
| chr12 | 81845051 | 81845211 |
| chr12 | 81859701 | 81860083 |
| chr12 | 81860083 | 81860330 |
| chr12 | 81860330 | 81860576 |
| chr12 | 81860576 | 81860820 |
| chr12 | 81860820 | 81861233 |
| chr12 | 81915649 | 81915880 |
| chr12 | 81919072 | 81919472 |
| chr12 | 81933575 | 81933767 |
| chr12 | 81937491 | 81937641 |
| chr12 | 81971211 | 81971693 |
| chr12 | 81971693 | 81972284 |
| chr12 | 81985672 | 81985977 |
| chr12 | 81985986 | 81986157 |
| chr12 | 81986159 | 81986402 |
| chr12 | 82002690 | 82003111 |
| chr12 | 82009178 | 82009356 |
| chr12 | 82014113 | 82014294 |
| chr12 | 82025696 | 82025980 |
| chr12 | 82026018 | 82026342 |
| chr12 | 82026342 | 82026567 |
| chr12 | 82033548 | 82033898 |
| chr12 | 82040023 | 82040187 |
| chr12 | 82044939 | 82045140 |
| chr12 | 82056475 | 82056882 |
| chr12 | 82056882 | 82057172 |
| chr12 | 82057172 | 82057396 |
| chr12 | 82065089 | 82065357 |
| chr12 | 82067901 | 82068083 |
| chr12 | 82072793 | 82073131 |
| chr12 | 82085774 | 82086040 |
| chr12 | 82086040 | 82086420 |
| chr12 | 82086420 | 82086764 |
| chr12 | 82121445 | 82121612 |
| chr12 | 82122230 | 82122605 |
| chr12 | 82122605 | 82122877 |
| chr12 | 82123000 | 82123219 |
| chr12 | 82124669 | 82124864 |
| chr12 | 82154545 | 82154988 |
| chr12 | 82154988 | 82155331 |

|       |          |          |
|-------|----------|----------|
| chr12 | 82163578 | 82163892 |
| chr12 | 82163892 | 82164184 |
| chr12 | 82169068 | 82169736 |
| chr12 | 82169736 | 82170184 |
| chr12 | 82170184 | 82170435 |
| chr12 | 82187512 | 82187769 |
| chr12 | 82187886 | 82188146 |
| chr12 | 82188447 | 82189358 |
| chr12 | 82189404 | 82189637 |
| chr12 | 82209651 | 82210101 |
| chr12 | 82220798 | 82221016 |
| chr12 | 82221079 | 82221320 |
| chr12 | 82226052 | 82226212 |
| chr12 | 82226780 | 82227047 |
| chr12 | 82227367 | 82227587 |
| chr12 | 82247644 | 82247901 |
| chr12 | 82247901 | 82248129 |
| chr12 | 82251383 | 82251631 |
| chr12 | 82256904 | 82257064 |
| chr12 | 82258067 | 82258315 |
| chr12 | 82284586 | 82285371 |
| chr12 | 82303090 | 82303412 |
| chr12 | 82319790 | 82320114 |
| chr12 | 82322819 | 82323041 |
| chr12 | 82323136 | 82323401 |
| chr12 | 82387813 | 82387969 |
| chr12 | 82392360 | 82392665 |
| chr12 | 82397455 | 82397605 |
| chr12 | 82397849 | 82398104 |
| chr12 | 82412289 | 82412483 |
| chr12 | 82412483 | 82412689 |
| chr12 | 82412689 | 82412974 |
| chr12 | 82427434 | 82427755 |
| chr12 | 82465055 | 82465219 |
| chr12 | 82470017 | 82470524 |
| chr12 | 82470590 | 82470946 |
| chr12 | 82493357 | 82493572 |
| chr12 | 82568477 | 82568684 |
| chr12 | 82591824 | 82592133 |
| chr12 | 82616781 | 82617012 |
| chr12 | 82816025 | 82816293 |
| chr12 | 82893390 | 82893571 |



|       |          |          |
|-------|----------|----------|
| chr12 | 82996293 | 82996447 |
| chr12 | 83033270 | 83033443 |
| chr12 | 83085256 | 83085406 |
| chr12 | 83105599 | 83105799 |
| chr12 | 83114501 | 83114656 |
| chr12 | 83309890 | 83310071 |
| chr12 | 83328962 | 83329310 |
| chr12 | 83486734 | 83486908 |
| chr12 | 83486930 | 83487435 |
| chr12 | 83487510 | 83488018 |
| chr12 | 83502309 | 83502552 |
| chr12 | 83520229 | 83520575 |
| chr12 | 83520575 | 83520871 |
| chr12 | 83525908 | 83526098 |
| chr12 | 83527575 | 83527725 |
| chr12 | 83527891 | 83528125 |
| chr12 | 83549267 | 83549435 |
| chr12 | 83557594 | 83557952 |
| chr12 | 83560238 | 83560581 |
| chr12 | 83586737 | 83587005 |
| chr12 | 83592089 | 83592388 |
| chr12 | 83596784 | 83597564 |
| chr12 | 83631817 | 83632162 |
| chr12 | 83632162 | 83632389 |
| chr12 | 83632389 | 83632671 |
| chr12 | 83632671 | 83632993 |
| chr12 | 83643008 | 83643480 |
| chr12 | 83670003 | 83670158 |
| chr12 | 83687840 | 83688393 |
| chr12 | 83688393 | 83688975 |
| chr12 | 83704913 | 83705291 |
| chr12 | 83705337 | 83705662 |
| chr12 | 83705662 | 83706089 |
| chr12 | 83713835 | 83714076 |
| chr12 | 83749247 | 83749425 |
| chr12 | 83754727 | 83754935 |
| chr12 | 83759491 | 83759696 |
| chr12 | 83759696 | 83759875 |
| chr12 | 83763419 | 83763656 |
| chr12 | 83763656 | 83763891 |
| chr12 | 83763904 | 83764147 |
| chr12 | 83764147 | 83764381 |

|       |          |          |
|-------|----------|----------|
| chr12 | 83765926 | 83766187 |
| chr12 | 83770267 | 83770517 |
| chr12 | 83770517 | 83770784 |
| chr12 | 83770927 | 83771190 |
| chr12 | 83777070 | 83777222 |
| chr12 | 83780312 | 83780565 |
| chr12 | 83780602 | 83780783 |
| chr12 | 83833989 | 83834323 |
| chr12 | 83854305 | 83854616 |
| chr12 | 83864546 | 83864780 |
| chr12 | 83874458 | 83874965 |
| chr12 | 83875112 | 83875645 |
| chr12 | 83882579 | 83882792 |
| chr12 | 83884935 | 83885301 |
| chr12 | 83885301 | 83885623 |
| chr12 | 83902356 | 83902835 |
| chr12 | 83921376 | 83922016 |
| chr12 | 83922016 | 83922321 |
| chr12 | 83950461 | 83950833 |
| chr12 | 83950833 | 83951221 |
| chr12 | 83951221 | 83951692 |
| chr12 | 83959085 | 83959245 |
| chr12 | 83972078 | 83972487 |
| chr12 | 83987268 | 83987617 |
| chr12 | 83987617 | 83987950 |
| chr12 | 83987950 | 83988204 |
| chr12 | 83988204 | 83988553 |
| chr12 | 83998579 | 83998980 |
| chr12 | 83999091 | 83999606 |
| chr12 | 83999606 | 83999892 |
| chr12 | 84009361 | 84009644 |
| chr12 | 84009644 | 84009944 |
| chr12 | 84011599 | 84011884 |
| chr12 | 84020482 | 84020904 |
| chr12 | 84030771 | 84031005 |
| chr12 | 84031005 | 84031299 |
| chr12 | 84038248 | 84038463 |
| chr12 | 84038463 | 84038763 |
| chr12 | 84038763 | 84039113 |
| chr12 | 84046936 | 84047252 |
| chr12 | 84053641 | 84053933 |
| chr12 | 84057232 | 84057676 |

|       |          |          |
|-------|----------|----------|
| chr12 | 84061035 | 84061201 |
| chr12 | 84067996 | 84068291 |
| chr12 | 84068962 | 84069328 |
| chr12 | 84069328 | 84069659 |
| chr12 | 84069659 | 84069957 |
| chr12 | 84100692 | 84100911 |
| chr12 | 84100911 | 84101146 |
| chr12 | 84101146 | 84101490 |
| chr12 | 84114108 | 84114467 |
| chr12 | 84114467 | 84114880 |
| chr12 | 84126926 | 84127268 |
| chr12 | 84127301 | 84127551 |
| chr12 | 84132341 | 84132570 |
| chr12 | 84141256 | 84141488 |
| chr12 | 84145729 | 84145891 |
| chr12 | 84147930 | 84148085 |
| chr12 | 84152558 | 84152719 |
| chr12 | 84153535 | 84153696 |
| chr12 | 84155235 | 84155397 |
| chr12 | 84160541 | 84160754 |
| chr12 | 84161633 | 84161854 |
| chr12 | 84161854 | 84162136 |
| chr12 | 84163129 | 84163698 |
| chr12 | 84164099 | 84164285 |
| chr12 | 84174893 | 84175229 |
| chr12 | 84175546 | 84176134 |
| chr12 | 84178117 | 84178382 |
| chr12 | 84178651 | 84178878 |
| chr12 | 84179138 | 84179360 |
| chr12 | 84180972 | 84181366 |
| chr12 | 84187186 | 84187336 |
| chr12 | 84190133 | 84190348 |
| chr12 | 84190348 | 84190618 |
| chr12 | 84192777 | 84192986 |
| chr12 | 84192986 | 84193274 |
| chr12 | 84193665 | 84193929 |
| chr12 | 84193929 | 84194397 |
| chr12 | 84201304 | 84201572 |
| chr12 | 84201575 | 84201915 |
| chr12 | 84203263 | 84203516 |
| chr12 | 84203608 | 84204170 |
| chr12 | 84212403 | 84212632 |

|       |          |          |
|-------|----------|----------|
| chr12 | 84212831 | 84213085 |
| chr12 | 84216955 | 84217202 |
| chr12 | 84217202 | 84217482 |
| chr12 | 84217543 | 84217883 |
| chr12 | 84218253 | 84218695 |
| chr12 | 84218695 | 84219088 |
| chr12 | 84222597 | 84223033 |
| chr12 | 84232869 | 84233165 |
| chr12 | 84233229 | 84233536 |
| chr12 | 84233536 | 84233756 |
| chr12 | 84235672 | 84235939 |
| chr12 | 84249254 | 84249545 |
| chr12 | 84260795 | 84261008 |
| chr12 | 84278917 | 84279568 |
| chr12 | 84284861 | 84285160 |
| chr12 | 84285160 | 84285662 |
| chr12 | 84288581 | 84288751 |
| chr12 | 84316630 | 84316960 |
| chr12 | 84316960 | 84317316 |
| chr12 | 84317316 | 84317721 |
| chr12 | 84347266 | 84347516 |
| chr12 | 84361517 | 84361803 |
| chr12 | 84361803 | 84362510 |
| chr12 | 84367133 | 84367310 |
| chr12 | 84384639 | 84384833 |
| chr12 | 84384833 | 84385026 |
| chr12 | 84393929 | 84394194 |
| chr12 | 84400794 | 84400985 |
| chr12 | 84408086 | 84408330 |
| chr12 | 84408330 | 84408750 |
| chr12 | 84408750 | 84409367 |
| chr12 | 84417135 | 84417370 |
| chr12 | 84417370 | 84417733 |
| chr12 | 84440528 | 84440678 |
| chr12 | 84450654 | 84450892 |
| chr12 | 84450892 | 84451131 |
| chr12 | 84451131 | 84451304 |
| chr12 | 84451304 | 84451617 |
| chr12 | 84451653 | 84451803 |
| chr12 | 84468784 | 84468946 |
| chr12 | 84533854 | 84534009 |
| chr12 | 84539690 | 84539915 |

|       |          |          |
|-------|----------|----------|
| chr12 | 84540812 | 84541078 |
| chr12 | 84545877 | 84546027 |
| chr12 | 84546070 | 84546366 |
| chr12 | 84570080 | 84570342 |
| chr12 | 84571685 | 84571862 |
| chr12 | 84571862 | 84572067 |
| chr12 | 84578158 | 84578315 |
| chr12 | 84578445 | 84578797 |
| chr12 | 84589777 | 84590106 |
| chr12 | 84590603 | 84590753 |
| chr12 | 84591239 | 84591422 |
| chr12 | 84606003 | 84606167 |
| chr12 | 84614399 | 84614608 |
| chr12 | 84614608 | 84614892 |
| chr12 | 84617070 | 84617317 |
| chr12 | 84617317 | 84617671 |
| chr12 | 84617844 | 84618013 |
| chr12 | 84620952 | 84621194 |
| chr12 | 84637447 | 84637665 |
| chr12 | 84653822 | 84653972 |
| chr12 | 84653983 | 84654249 |
| chr12 | 84670626 | 84670856 |
| chr12 | 84698227 | 84699062 |
| chr12 | 84723503 | 84723655 |
| chr12 | 84729664 | 84729905 |
| chr12 | 84750765 | 84750985 |
| chr12 | 84755375 | 84755632 |
| chr12 | 84756019 | 84756169 |
| chr12 | 84759112 | 84759364 |
| chr12 | 84762569 | 84762729 |
| chr12 | 84764679 | 84765083 |
| chr12 | 84766330 | 84766830 |
| chr12 | 84767499 | 84767817 |
| chr12 | 84767817 | 84767996 |
| chr12 | 84772707 | 84773432 |
| chr12 | 84773618 | 84773768 |
| chr12 | 84774485 | 84774675 |
| chr12 | 84780984 | 84781294 |
| chr12 | 84784536 | 84784925 |
| chr12 | 84784925 | 84785214 |
| chr12 | 84792592 | 84792844 |
| chr12 | 84801640 | 84802254 |

|       |          |          |
|-------|----------|----------|
| chr12 | 84805644 | 84805917 |
| chr12 | 84810938 | 84811277 |
| chr12 | 84813840 | 84814118 |
| chr12 | 84815449 | 84815765 |
| chr12 | 84819353 | 84819643 |
| chr12 | 84827551 | 84828059 |
| chr12 | 84835230 | 84835533 |
| chr12 | 84835642 | 84836010 |
| chr12 | 84837219 | 84837369 |
| chr12 | 84845811 | 84845999 |
| chr12 | 84846467 | 84846804 |
| chr12 | 84846804 | 84847190 |
| chr12 | 84847190 | 84847571 |
| chr12 | 84847571 | 84847858 |
| chr12 | 84857865 | 84858015 |
| chr12 | 84864932 | 84865192 |
| chr12 | 84871442 | 84871673 |
| chr12 | 84875840 | 84876137 |
| chr12 | 84876162 | 84876331 |
| chr12 | 84876776 | 84877135 |
| chr12 | 84878659 | 84878848 |
| chr12 | 84879704 | 84879854 |
| chr12 | 84881085 | 84881547 |
| chr12 | 84884612 | 84885011 |
| chr12 | 84885011 | 84885423 |
| chr12 | 84885423 | 84885741 |
| chr12 | 84900139 | 84900301 |
| chr12 | 84904504 | 84904751 |
| chr12 | 84905159 | 84905449 |
| chr12 | 84906790 | 84906968 |
| chr12 | 84907714 | 84907880 |
| chr12 | 84908630 | 84908873 |
| chr12 | 84909510 | 84909717 |
| chr12 | 84920278 | 84920599 |
| chr12 | 84920616 | 84921012 |
| chr12 | 84926583 | 84926866 |
| chr12 | 84929462 | 84929890 |
| chr12 | 84958920 | 84959211 |
| chr12 | 84959211 | 84959481 |
| chr12 | 84969438 | 84969600 |
| chr12 | 84969824 | 84970005 |
| chr12 | 84970043 | 84970204 |

|       |          |          |
|-------|----------|----------|
| chr12 | 84970252 | 84970506 |
| chr12 | 84970526 | 84970778 |
| chr12 | 84970778 | 84971157 |
| chr12 | 84971235 | 84971385 |
| chr12 | 84971421 | 84971605 |
| chr12 | 84987054 | 84987238 |
| chr12 | 84994334 | 84994491 |
| chr12 | 84996005 | 84996543 |
| chr12 | 84996543 | 84996887 |
| chr12 | 84996887 | 84997176 |
| chr12 | 84997176 | 84997427 |
| chr12 | 85009861 | 85010175 |
| chr12 | 85032770 | 85033030 |
| chr12 | 85050922 | 85051189 |
| chr12 | 85051189 | 85051528 |
| chr12 | 85051528 | 85051851 |
| chr12 | 85092319 | 85092524 |
| chr12 | 85093966 | 85094608 |
| chr12 | 85110154 | 85110323 |
| chr12 | 85110442 | 85110940 |
| chr12 | 85110940 | 85111162 |
| chr12 | 85111162 | 85111368 |
| chr12 | 85111439 | 85111589 |
| chr12 | 85121472 | 85121638 |
| chr12 | 85135891 | 85136263 |
| chr12 | 85136263 | 85136578 |
| chr12 | 85136578 | 85137017 |
| chr12 | 85142846 | 85143129 |
| chr12 | 85150966 | 85151492 |
| chr12 | 85153060 | 85153335 |
| chr12 | 85156366 | 85156630 |
| chr12 | 85162987 | 85163147 |
| chr12 | 85169479 | 85169815 |
| chr12 | 85169907 | 85170100 |
| chr12 | 85170142 | 85170292 |
| chr12 | 85170298 | 85170507 |
| chr12 | 85170507 | 85170698 |
| chr12 | 85176507 | 85176663 |
| chr12 | 85176677 | 85177025 |
| chr12 | 85177025 | 85177248 |
| chr12 | 85177248 | 85177715 |
| chr12 | 85185874 | 85186295 |

|       |          |          |
|-------|----------|----------|
| chr12 | 85186295 | 85186786 |
| chr12 | 85186795 | 85186958 |
| chr12 | 85192296 | 85192686 |
| chr12 | 85192686 | 85193198 |
| chr12 | 85200508 | 85200841 |
| chr12 | 85200894 | 85201060 |
| chr12 | 85201528 | 85201822 |
| chr12 | 85201822 | 85202189 |
| chr12 | 85203663 | 85204138 |
| chr12 | 85208906 | 85209058 |
| chr12 | 85209058 | 85209254 |
| chr12 | 85209463 | 85209686 |
| chr12 | 85219110 | 85219542 |
| chr12 | 85219542 | 85219811 |
| chr12 | 85219811 | 85220001 |
| chr12 | 85220001 | 85220189 |
| chr12 | 85232851 | 85233138 |
| chr12 | 85233422 | 85233986 |
| chr12 | 85270256 | 85270766 |
| chr12 | 85271562 | 85271712 |
| chr12 | 85271878 | 85272148 |
| chr12 | 85279794 | 85280190 |
| chr12 | 85280190 | 85280580 |
| chr12 | 85280580 | 85280820 |
| chr12 | 85281209 | 85281454 |
| chr12 | 85285062 | 85285307 |
| chr12 | 85287048 | 85287251 |
| chr12 | 85288094 | 85288447 |
| chr12 | 85288447 | 85288815 |
| chr12 | 85288815 | 85289177 |
| chr12 | 85305383 | 85305622 |
| chr12 | 85305622 | 85305875 |
| chr12 | 85327305 | 85327471 |
| chr12 | 85330109 | 85330785 |
| chr12 | 85337390 | 85337589 |
| chr12 | 85337986 | 85338197 |
| chr12 | 85338808 | 85339222 |
| chr12 | 85339222 | 85339478 |
| chr12 | 85339478 | 85339723 |
| chr12 | 85341213 | 85341535 |
| chr12 | 85346470 | 85346703 |
| chr12 | 85348314 | 85348961 |



|       |          |          |
|-------|----------|----------|
| chr12 | 85348961 | 85349340 |
| chr12 | 85350649 | 85350857 |
| chr12 | 85362448 | 85362981 |
| chr12 | 85373864 | 85374140 |
| chr12 | 85374140 | 85374504 |
| chr12 | 85374504 | 85374827 |
| chr12 | 85374859 | 85375232 |
| chr12 | 85380332 | 85380682 |
| chr12 | 85381044 | 85381255 |
| chr12 | 85388597 | 85388905 |
| chr12 | 85388931 | 85389100 |
| chr12 | 85397894 | 85398310 |
| chr12 | 85417853 | 85418397 |
| chr12 | 85418978 | 85419228 |
| chr12 | 85423917 | 85424136 |
| chr12 | 85429963 | 85430402 |
| chr12 | 85430402 | 85430915 |
| chr12 | 85436238 | 85436647 |
| chr12 | 85437686 | 85437892 |
| chr12 | 85439384 | 85439602 |
| chr12 | 85441626 | 85441912 |
| chr12 | 85449819 | 85450300 |
| chr12 | 85451559 | 85451882 |
| chr12 | 85451882 | 85452198 |
| chr12 | 85452200 | 85452495 |
| chr12 | 85454901 | 85455292 |
| chr12 | 85455292 | 85455805 |
| chr12 | 85462341 | 85462560 |
| chr12 | 85472023 | 85472413 |
| chr12 | 85472413 | 85472801 |
| chr12 | 85473384 | 85473728 |
| chr12 | 85473728 | 85474110 |
| chr12 | 85474110 | 85474390 |
| chr12 | 85477894 | 85478393 |
| chr12 | 85478769 | 85479017 |
| chr12 | 85484769 | 85484987 |
| chr12 | 85485375 | 85485726 |
| chr12 | 85485726 | 85486093 |
| chr12 | 85486093 | 85486410 |
| chr12 | 85486817 | 85487092 |
| chr12 | 85487535 | 85487722 |
| chr12 | 85487772 | 85488032 |

|       |          |          |
|-------|----------|----------|
| chr12 | 85492130 | 85492470 |
| chr12 | 85496469 | 85496654 |
| chr12 | 85496780 | 85497074 |
| chr12 | 85497428 | 85497866 |
| chr12 | 85497866 | 85498209 |
| chr12 | 85510579 | 85510864 |
| chr12 | 85519601 | 85519937 |
| chr12 | 85520803 | 85521036 |
| chr12 | 85523531 | 85523754 |
| chr12 | 85527128 | 85527349 |
| chr12 | 85537869 | 85538106 |
| chr12 | 85541058 | 85541615 |
| chr12 | 85569546 | 85569751 |
| chr12 | 85569751 | 85570113 |
| chr12 | 85570113 | 85570642 |
| chr12 | 85571298 | 85571653 |
| chr12 | 85572206 | 85572452 |
| chr12 | 85592945 | 85593289 |
| chr12 | 85593490 | 85593736 |
| chr12 | 85594483 | 85594655 |
| chr12 | 85598628 | 85599565 |
| chr12 | 85599565 | 85600139 |
| chr12 | 85612123 | 85612339 |
| chr12 | 85615609 | 85615813 |
| chr12 | 85623584 | 85624080 |
| chr12 | 85624110 | 85624408 |
| chr12 | 85624588 | 85624901 |
| chr12 | 85639330 | 85639513 |
| chr12 | 85642692 | 85642898 |
| chr12 | 85644754 | 85644961 |
| chr12 | 85645762 | 85645974 |
| chr12 | 85647393 | 85647653 |
| chr12 | 85661020 | 85661280 |
| chr12 | 85662940 | 85663187 |
| chr12 | 85698134 | 85698608 |
| chr12 | 85705076 | 85705305 |
| chr12 | 85705305 | 85705547 |
| chr12 | 85705547 | 85705827 |
| chr12 | 85710855 | 85711124 |
| chr12 | 85712587 | 85712780 |
| chr12 | 85729443 | 85729746 |
| chr12 | 85729929 | 85730222 |

|       |          |          |
|-------|----------|----------|
| chr12 | 85733125 | 85733425 |
| chr12 | 85736241 | 85736562 |
| chr12 | 85736821 | 85737275 |
| chr12 | 85745750 | 85746056 |
| chr12 | 85746056 | 85746345 |
| chr12 | 85746345 | 85746669 |
| chr12 | 85746679 | 85747033 |
| chr12 | 85752841 | 85753074 |
| chr12 | 85754681 | 85755010 |
| chr12 | 85762896 | 85763124 |
| chr12 | 85769966 | 85770244 |
| chr12 | 85777535 | 85777706 |
| chr12 | 85779768 | 85779992 |
| chr12 | 85783968 | 85784249 |
| chr12 | 85784249 | 85784591 |
| chr12 | 85792353 | 85792859 |
| chr12 | 85793079 | 85793414 |
| chr12 | 85793512 | 85793732 |
| chr12 | 85818456 | 85818850 |
| chr12 | 85824411 | 85824818 |
| chr12 | 85824818 | 85825335 |
| chr12 | 85825383 | 85825570 |
| chr12 | 85837845 | 85837995 |
| chr12 | 85840693 | 85840903 |
| chr12 | 85848220 | 85848488 |
| chr12 | 85869120 | 85869398 |
| chr12 | 85869398 | 85869747 |
| chr12 | 85869747 | 85870123 |
| chr12 | 85903959 | 85904388 |
| chr12 | 85937513 | 85937794 |
| chr12 | 85942739 | 85942965 |
| chr12 | 85943042 | 85943253 |
| chr12 | 85943253 | 85943439 |
| chr12 | 85954249 | 85954513 |
| chr12 | 85956305 | 85956564 |
| chr12 | 85958560 | 85958837 |
| chr12 | 85959798 | 85960124 |
| chr12 | 85960124 | 85960557 |
| chr12 | 85963718 | 85963994 |
| chr12 | 85967876 | 85968095 |
| chr12 | 85969559 | 85970015 |
| chr12 | 85970222 | 85970507 |

|       |          |          |
|-------|----------|----------|
| chr12 | 85971714 | 85972185 |
| chr12 | 85972565 | 85972766 |
| chr12 | 85973545 | 85973948 |
| chr12 | 85987287 | 85987659 |
| chr12 | 85992073 | 85992349 |
| chr12 | 86000330 | 86000624 |
| chr12 | 86000624 | 86001035 |
| chr12 | 86012144 | 86012575 |
| chr12 | 86014687 | 86014946 |
| chr12 | 86015103 | 86015397 |
| chr12 | 86024535 | 86024685 |
| chr12 | 86039919 | 86040089 |
| chr12 | 86047898 | 86048252 |
| chr12 | 86057705 | 86057887 |
| chr12 | 86066717 | 86067045 |
| chr12 | 86069075 | 86069297 |
| chr12 | 86069341 | 86069491 |
| chr12 | 86078859 | 86079200 |
| chr12 | 86079236 | 86079744 |
| chr12 | 86082404 | 86082685 |
| chr12 | 86082685 | 86083093 |
| chr12 | 86085920 | 86086122 |
| chr12 | 86104933 | 86105339 |
| chr12 | 86106153 | 86106341 |
| chr12 | 86108591 | 86108810 |
| chr12 | 86110723 | 86110958 |
| chr12 | 86128715 | 86129065 |
| chr12 | 86129065 | 86129524 |
| chr12 | 86132927 | 86133104 |
| chr12 | 86142199 | 86142779 |
| chr12 | 86142819 | 86142980 |
| chr12 | 86143277 | 86143429 |
| chr12 | 86166363 | 86166587 |
| chr12 | 86168813 | 86169073 |
| chr12 | 86181997 | 86182262 |
| chr12 | 86198232 | 86198658 |
| chr12 | 86213167 | 86213378 |
| chr12 | 86217140 | 86217294 |
| chr12 | 86228394 | 86228803 |
| chr12 | 86229769 | 86229966 |
| chr12 | 86230314 | 86230608 |
| chr12 | 86231451 | 86231799 |

|       |          |          |
|-------|----------|----------|
| chr12 | 86234364 | 86234702 |
| chr12 | 86234702 | 86235041 |
| chr12 | 86241228 | 86241493 |
| chr12 | 86241590 | 86242058 |
| chr12 | 86242058 | 86242372 |
| chr12 | 86242372 | 86242550 |
| chr12 | 86329028 | 86329201 |
| chr12 | 86336300 | 86336450 |
| chr12 | 86361353 | 86361559 |
| chr12 | 86364209 | 86364705 |
| chr12 | 86365546 | 86366017 |
| chr12 | 86366043 | 86366347 |
| chr12 | 86385793 | 86386094 |
| chr12 | 86395379 | 86395648 |
| chr12 | 86395648 | 86395840 |
| chr12 | 86398727 | 86399095 |
| chr12 | 86401856 | 86402356 |
| chr12 | 86402440 | 86402774 |
| chr12 | 86402774 | 86403053 |
| chr12 | 86421568 | 86421833 |
| chr12 | 86422462 | 86422650 |
| chr12 | 86426368 | 86426550 |
| chr12 | 86433300 | 86433590 |
| chr12 | 86433590 | 86433824 |
| chr12 | 86435306 | 86435585 |
| chr12 | 86435585 | 86435893 |
| chr12 | 86435893 | 86436148 |
| chr12 | 86470007 | 86470157 |
| chr12 | 86483987 | 86484143 |
| chr12 | 86525602 | 86525773 |
| chr12 | 86578004 | 86578294 |
| chr12 | 86592100 | 86592296 |
| chr12 | 86612852 | 86613027 |
| chr12 | 86614271 | 86614474 |
| chr12 | 86648627 | 86648780 |
| chr12 | 86652460 | 86653110 |
| chr12 | 86678548 | 86678826 |
| chr12 | 86678826 | 86679058 |
| chr12 | 86679058 | 86679309 |
| chr12 | 86679309 | 86679556 |
| chr12 | 86689448 | 86689728 |
| chr12 | 86689869 | 86690116 |

|       |          |          |
|-------|----------|----------|
| chr12 | 86693086 | 86693292 |
| chr12 | 86694422 | 86694848 |
| chr12 | 86698567 | 86698900 |
| chr12 | 86701038 | 86701206 |
| chr12 | 86710309 | 86710770 |
| chr12 | 86710779 | 86711025 |
| chr12 | 86714169 | 86714374 |
| chr12 | 86715451 | 86715734 |
| chr12 | 86725717 | 86725870 |
| chr12 | 86725922 | 86726693 |
| chr12 | 86749501 | 86749723 |
| chr12 | 86750468 | 86750694 |
| chr12 | 86767923 | 86768159 |
| chr12 | 86769078 | 86769327 |
| chr12 | 86771914 | 86772426 |
| chr12 | 86774045 | 86774279 |
| chr12 | 86779681 | 86779953 |
| chr12 | 86786799 | 86787188 |
| chr12 | 86787188 | 86787617 |
| chr12 | 86790369 | 86790737 |
| chr12 | 86790737 | 86791053 |
| chr12 | 86793966 | 86794295 |
| chr12 | 86795439 | 86795800 |
| chr12 | 86795862 | 86796051 |
| chr12 | 86800790 | 86801168 |
| chr12 | 86801168 | 86801597 |
| chr12 | 86801597 | 86802121 |
| chr12 | 86802121 | 86802683 |
| chr12 | 86806401 | 86806551 |
| chr12 | 86807473 | 86807678 |
| chr12 | 86810846 | 86811121 |
| chr12 | 86816953 | 86817103 |
| chr12 | 86819231 | 86819529 |
| chr12 | 86823815 | 86824227 |
| chr12 | 86824227 | 86824575 |
| chr12 | 86824816 | 86825370 |
| chr12 | 86826365 | 86827198 |
| chr12 | 86827253 | 86827408 |
| chr12 | 86832067 | 86832499 |
| chr12 | 86832499 | 86832963 |
| chr12 | 86833588 | 86834107 |
| chr12 | 86834499 | 86834854 |

|       |          |          |
|-------|----------|----------|
| chr12 | 86836697 | 86837039 |
| chr12 | 86851346 | 86851760 |
| chr12 | 86855834 | 86856001 |
| chr12 | 86857499 | 86857671 |
| chr12 | 86859361 | 86859722 |
| chr12 | 86860216 | 86860609 |
| chr12 | 86860661 | 86860816 |
| chr12 | 86867228 | 86867545 |
| chr12 | 86867672 | 86867968 |
| chr12 | 86867968 | 86868270 |
| chr12 | 86872269 | 86872715 |
| chr12 | 86872715 | 86873020 |
| chr12 | 86878397 | 86878654 |
| chr12 | 86878762 | 86878974 |
| chr12 | 86879113 | 86879304 |
| chr12 | 86879506 | 86879657 |
| chr12 | 86882269 | 86882604 |
| chr12 | 86882821 | 86883027 |
| chr12 | 86883344 | 86883538 |
| chr12 | 86884004 | 86884237 |
| chr12 | 86884295 | 86885132 |
| chr12 | 86888149 | 86888395 |
| chr12 | 86888550 | 86888946 |
| chr12 | 86889424 | 86889654 |
| chr12 | 86892458 | 86892708 |
| chr12 | 86893971 | 86894147 |
| chr12 | 86894219 | 86894534 |
| chr12 | 86894534 | 86894890 |
| chr12 | 86894971 | 86895183 |
| chr12 | 86895183 | 86895475 |
| chr12 | 86896417 | 86896698 |
| chr12 | 86899558 | 86899791 |
| chr12 | 86905272 | 86905527 |
| chr12 | 86905723 | 86905887 |
| chr12 | 86905933 | 86906207 |
| chr12 | 86906207 | 86906444 |
| chr12 | 86906444 | 86906761 |
| chr12 | 86912788 | 86913112 |
| chr12 | 86913358 | 86913628 |
| chr12 | 86913628 | 86913853 |
| chr12 | 86919110 | 86919303 |
| chr12 | 86923704 | 86924181 |

|       |          |          |
|-------|----------|----------|
| chr12 | 86924492 | 86924675 |
| chr12 | 86940899 | 86941606 |
| chr12 | 86942154 | 86942419 |
| chr12 | 86946858 | 86947195 |
| chr12 | 86947195 | 86947597 |
| chr12 | 86947744 | 86948171 |
| chr12 | 86948174 | 86948334 |
| chr12 | 86948700 | 86948967 |
| chr12 | 86955730 | 86956324 |
| chr12 | 86956439 | 86956704 |
| chr12 | 86972994 | 86973736 |
| chr12 | 86974337 | 86974683 |
| chr12 | 86974683 | 86974947 |
| chr12 | 86978032 | 86978205 |
| chr12 | 86983529 | 86983767 |
| chr12 | 86984246 | 86984461 |
| chr12 | 86989929 | 86990509 |
| chr12 | 86994281 | 86994504 |
| chr12 | 86999247 | 86999802 |
| chr12 | 87000187 | 87000363 |
| chr12 | 87000688 | 87000915 |
| chr12 | 87001526 | 87001678 |
| chr12 | 87002288 | 87002446 |
| chr12 | 87006587 | 87006758 |
| chr12 | 87026052 | 87026319 |
| chr12 | 87026319 | 87026572 |
| chr12 | 87026572 | 87026916 |
| chr12 | 87031510 | 87031703 |
| chr12 | 87047649 | 87047799 |
| chr12 | 87052798 | 87053253 |
| chr12 | 87091225 | 87091577 |
| chr12 | 87091577 | 87092180 |
| chr12 | 87101718 | 87101936 |
| chr12 | 87130281 | 87130609 |
| chr12 | 87146957 | 87147381 |
| chr12 | 87147381 | 87147798 |
| chr12 | 87147798 | 87148087 |
| chr12 | 87154105 | 87154288 |
| chr12 | 87199608 | 87200021 |
| chr12 | 87200021 | 87200396 |
| chr12 | 87200396 | 87200642 |
| chr12 | 87203923 | 87204220 |



|       |          |          |
|-------|----------|----------|
| chr12 | 87205969 | 87206153 |
| chr12 | 87226837 | 87227034 |
| chr12 | 87256669 | 87257004 |
| chr12 | 87265944 | 87266540 |
| chr12 | 87266540 | 87266829 |
| chr12 | 87266829 | 87267064 |
| chr12 | 87267064 | 87267280 |
| chr12 | 87267280 | 87267445 |
| chr12 | 87276106 | 87276261 |
| chr12 | 87276667 | 87276825 |
| chr12 | 87279423 | 87279620 |
| chr12 | 87279794 | 87280245 |
| chr12 | 87285631 | 87285786 |
| chr12 | 87293960 | 87294275 |
| chr12 | 87299182 | 87299625 |
| chr12 | 87299625 | 87299967 |
| chr12 | 87299967 | 87300293 |
| chr12 | 87300293 | 87300525 |
| chr12 | 87300525 | 87300727 |
| chr12 | 87387749 | 87388043 |
| chr12 | 87388083 | 87388403 |
| chr12 | 87388403 | 87388761 |
| chr12 | 87398147 | 87398398 |
| chr12 | 87399078 | 87399404 |
| chr12 | 87399404 | 87399736 |
| chr12 | 87405237 | 87405509 |
| chr12 | 87405778 | 87406153 |
| chr12 | 87407818 | 87408447 |
| chr12 | 87409170 | 87409458 |
| chr12 | 87413241 | 87413675 |
| chr12 | 87416763 | 87417018 |
| chr12 | 87419934 | 87420385 |
| chr12 | 87423803 | 87424029 |
| chr12 | 87433870 | 87434156 |
| chr12 | 87434689 | 87434913 |
| chr12 | 87434920 | 87435367 |
| chr12 | 87435451 | 87435762 |
| chr12 | 87443357 | 87443737 |
| chr12 | 87443737 | 87444061 |
| chr12 | 87471836 | 87472148 |
| chr12 | 87472148 | 87472455 |
| chr12 | 87472455 | 87472669 |

|       |          |          |
|-------|----------|----------|
| chr12 | 87477191 | 87477372 |
| chr12 | 87524152 | 87524394 |
| chr12 | 87566950 | 87567100 |
| chr12 | 87647245 | 87647562 |
| chr12 | 87844565 | 87844744 |
| chr12 | 87844972 | 87845331 |
| chr12 | 87857868 | 87858051 |
| chr12 | 87861989 | 87862152 |
| chr12 | 87862337 | 87862577 |
| chr12 | 87863598 | 87863898 |
| chr12 | 87866446 | 87866606 |
| chr12 | 87901751 | 87901901 |
| chr12 | 87903112 | 87903616 |
| chr12 | 87907525 | 87907632 |
| chr12 | 87907632 | 87907677 |
| chr12 | 87998479 | 87998858 |
| chr12 | 88159541 | 88159701 |
| chr12 | 88163550 | 88164122 |
| chr12 | 88182795 | 88182980 |
| chr12 | 88216456 | 88216660 |
| chr12 | 88245709 | 88246190 |
| chr12 | 88250078 | 88250270 |
| chr12 | 88263264 | 88263561 |
| chr12 | 88281932 | 88282082 |
| chr12 | 88285354 | 88285536 |
| chr12 | 88360376 | 88360673 |
| chr12 | 88360673 | 88361136 |
| chr12 | 88405192 | 88405419 |
| chr12 | 88443204 | 88443517 |
| chr12 | 88467426 | 88467741 |
| chr12 | 88523120 | 88523270 |
| chr12 | 88523323 | 88523493 |
| chr12 | 88709384 | 88709536 |
| chr12 | 88966273 | 88966668 |
| chr12 | 88967428 | 88967633 |
| chr12 | 88971221 | 88971471 |
| chr12 | 89134531 | 89134688 |
| chr12 | 89513871 | 89514081 |
| chr12 | 89592588 | 89592787 |
| chr12 | 89812147 | 89812598 |
| chr12 | 90166091 | 90166565 |
| chr12 | 90216677 | 90216967 |

|       |          |          |
|-------|----------|----------|
| chr12 | 90729741 | 90729895 |
| chr12 | 90740526 | 90740777 |
| chr12 | 90781092 | 90781335 |
| chr12 | 90781354 | 90781909 |
| chr12 | 90781909 | 90782255 |
| chr12 | 90905075 | 90905269 |
| chr12 | 90986927 | 90987077 |
| chr12 | 90987742 | 90988351 |
| chr12 | 90991001 | 90991262 |
| chr12 | 91029081 | 91029588 |
| chr12 | 91029588 | 91029918 |
| chr12 | 91070310 | 91070527 |
| chr12 | 91070530 | 91070984 |
| chr12 | 91081763 | 91082055 |
| chr12 | 91100226 | 91100394 |
| chr12 | 91208566 | 91208765 |
| chr12 | 91250505 | 91250825 |
| chr12 | 91250827 | 91251023 |
| chr12 | 91254920 | 91255129 |
| chr12 | 91291129 | 91291473 |
| chr12 | 91292566 | 91293057 |
| chr12 | 91293057 | 91293625 |
| chr12 | 91305623 | 91306153 |
| chr12 | 91312829 | 91313266 |
| chr12 | 91314280 | 91314509 |
| chr12 | 91326235 | 91326392 |
| chr12 | 91383885 | 91384251 |
| chr12 | 91384251 | 91384686 |
| chr12 | 91384709 | 91384923 |
| chr12 | 91386319 | 91386580 |
| chr12 | 91400247 | 91400674 |
| chr12 | 91400674 | 91401065 |
| chr12 | 91401065 | 91401292 |
| chr12 | 91403849 | 91404041 |
| chr12 | 91418954 | 91419111 |
| chr12 | 91423200 | 91423433 |
| chr12 | 91552068 | 91552294 |
| chr12 | 91557746 | 91557920 |
| chr12 | 91564533 | 91564683 |
| chr12 | 91579709 | 91580086 |
| chr12 | 91580091 | 91580259 |
| chr12 | 91580276 | 91580468 |

|       |          |          |
|-------|----------|----------|
| chr12 | 91585263 | 91585464 |
| chr12 | 91588245 | 91588660 |
| chr12 | 91589321 | 91589487 |
| chr12 | 91589777 | 91590120 |
| chr12 | 91590120 | 91590396 |
| chr12 | 91590396 | 91590685 |
| chr12 | 91590803 | 91591103 |
| chr12 | 91612242 | 91612392 |
| chr12 | 91612971 | 91613131 |
| chr12 | 91622551 | 91622773 |
| chr12 | 91625113 | 91625268 |
| chr12 | 91635710 | 91635889 |
| chr12 | 91640795 | 91640947 |
| chr12 | 91667545 | 91668065 |
| chr12 | 91668065 | 91668371 |
| chr12 | 91668477 | 91668963 |
| chr12 | 91675990 | 91676266 |
| chr12 | 91685832 | 91686330 |
| chr12 | 91691515 | 91691840 |
| chr12 | 91691840 | 91692084 |
| chr12 | 91710938 | 91711122 |
| chr12 | 91712324 | 91712525 |
| chr12 | 91736651 | 91736907 |
| chr12 | 91745019 | 91745331 |
| chr12 | 91745861 | 91746342 |
| chr12 | 91748208 | 91748854 |
| chr12 | 91752698 | 91753054 |
| chr12 | 91756634 | 91756788 |
| chr12 | 91765547 | 91765710 |
| chr12 | 91765710 | 91765915 |
| chr12 | 91774776 | 91775012 |
| chr12 | 91778236 | 91778422 |
| chr12 | 91778464 | 91778804 |
| chr12 | 91778804 | 91779050 |
| chr12 | 91779050 | 91779489 |
| chr12 | 91780674 | 91780854 |
| chr12 | 91789788 | 91790080 |
| chr12 | 91793372 | 91793560 |
| chr12 | 91816059 | 91816353 |
| chr12 | 91821486 | 91821653 |
| chr12 | 91832187 | 91832383 |
| chr12 | 91848564 | 91848769 |

|       |          |          |
|-------|----------|----------|
| chr12 | 91848769 | 91849074 |
| chr12 | 91849074 | 91849535 |
| chr12 | 91876688 | 91876978 |
| chr12 | 91877767 | 91877959 |
| chr12 | 91878401 | 91878573 |
| chr12 | 91878708 | 91878919 |
| chr12 | 91878919 | 91879204 |
| chr12 | 91904390 | 91904828 |
| chr12 | 93576913 | 93577315 |
| chr12 | 93928528 | 93928722 |
| chr12 | 93928722 | 93928972 |
| chr12 | 93928972 | 93929251 |
| chr12 | 93929251 | 93929486 |
| chr12 | 94042330 | 94042578 |
| chr12 | 94640236 | 94640454 |
| chr12 | 95489519 | 95489669 |
| chr12 | 95491579 | 95491794 |
| chr12 | 95491893 | 95492380 |
| chr12 | 95520125 | 95520288 |
| chr12 | 95533923 | 95534192 |
| chr12 | 95538685 | 95538922 |
| chr12 | 95559956 | 95560122 |
| chr12 | 95563422 | 95563804 |
| chr12 | 95599324 | 95599627 |
| chr12 | 95641667 | 95641961 |
| chr12 | 95652278 | 95652449 |
| chr12 | 95692156 | 95692364 |
| chr12 | 95694956 | 95695263 |
| chr12 | 95695263 | 95695520 |
| chr12 | 95695520 | 95695883 |
| chr12 | 95695883 | 95696200 |
| chr12 | 95703862 | 95704062 |
| chr12 | 95734118 | 95734397 |
| chr12 | 95743931 | 95744199 |
| chr12 | 95744350 | 95744587 |
| chr12 | 95746932 | 95747155 |
| chr12 | 95748752 | 95749082 |
| chr12 | 95749320 | 95749639 |
| chr12 | 95759229 | 95759398 |
| chr12 | 95764593 | 95764808 |
| chr12 | 95765071 | 95765229 |
| chr12 | 95765236 | 95765610 |

|       |          |          |
|-------|----------|----------|
| chr12 | 95790171 | 95790509 |
| chr12 | 95895822 | 95896096 |
| chr12 | 95940589 | 95940938 |
| chr12 | 96045938 | 96046098 |
| chr12 | 96065925 | 96066091 |
| chr12 | 96066555 | 96066708 |
| chr12 | 96066761 | 96067210 |
| chr12 | 96106343 | 96106505 |
| chr12 | 96154200 | 96154379 |
| chr12 | 96522742 | 96522956 |
| chr12 | 96849421 | 96849587 |
| chr12 | 96924720 | 96924957 |
| chr12 | 97061365 | 97061852 |
| chr12 | 97080459 | 97080617 |
| chr12 | 97872509 | 97872713 |
| chr12 | 97957394 | 97957620 |
| chr12 | 98053539 | 98053827 |
| chr12 | 98212514 | 98212785 |
| chr12 | 98212908 | 98213058 |
| chr12 | 98239014 | 98239164 |
| chr12 | 98244800 | 98245014 |
| chr12 | 98249694 | 98250068 |
| chr12 | 98250070 | 98250234 |
| chr12 | 98250265 | 98250541 |
| chr12 | 98252396 | 98252731 |
| chr12 | 98255455 | 98255953 |
| chr12 | 98258615 | 98259321 |
| chr12 | 98259321 | 98259732 |
| chr12 | 98282766 | 98283125 |
| chr12 | 98283125 | 98283479 |
| chr12 | 98283479 | 98283915 |
| chr12 | 98293867 | 98294017 |
| chr12 | 98318392 | 98318797 |
| chr12 | 98342254 | 98342471 |
| chr12 | 98444934 | 98445154 |
| chr12 | 98471326 | 98471517 |
| chr12 | 98501630 | 98501822 |
| chr12 | 98574006 | 98574156 |
| chr12 | 98574536 | 98574874 |
| chr12 | 98574874 | 98575174 |
| chr12 | 98577816 | 98578031 |
| chr12 | 98578031 | 98578354 |

|       |          |          |
|-------|----------|----------|
| chr12 | 98587084 | 98587365 |
| chr12 | 98588510 | 98588817 |
| chr12 | 98592135 | 98592286 |
| chr12 | 98627817 | 98628248 |
| chr12 | 98628248 | 98628563 |
| chr12 | 98628563 | 98628869 |
| chr12 | 98637999 | 98638240 |
| chr12 | 98674591 | 98674891 |
| chr12 | 98674891 | 98675232 |
| chr12 | 98681926 | 98682229 |
| chr12 | 98682281 | 98682512 |
| chr12 | 98689237 | 98689550 |
| chr12 | 98708381 | 98708652 |
| chr12 | 98712895 | 98713140 |
| chr12 | 98713556 | 98713858 |
| chr12 | 98713858 | 98714314 |
| chr12 | 98714502 | 98714656 |
| chr12 | 98714722 | 98715161 |
| chr12 | 98724812 | 98725510 |
| chr12 | 98725536 | 98725691 |
| chr12 | 98734377 | 98734857 |
| chr12 | 98734897 | 98735096 |
| chr12 | 98735112 | 98735309 |
| chr12 | 98737272 | 98737767 |
| chr12 | 98737879 | 98738131 |
| chr12 | 98741071 | 98741658 |
| chr12 | 98746152 | 98746469 |
| chr12 | 98746701 | 98746920 |
| chr12 | 98746920 | 98747121 |
| chr12 | 98747121 | 98747424 |
| chr12 | 98757721 | 98757896 |
| chr12 | 98779236 | 98779446 |
| chr12 | 98850842 | 98851088 |
| chr12 | 98872195 | 98872565 |
| chr12 | 98881838 | 98882062 |
| chr12 | 98900594 | 98901043 |
| chr12 | 98901043 | 98901347 |
| chr12 | 98901347 | 98901850 |
| chr12 | 98920129 | 98920456 |
| chr12 | 98920456 | 98920711 |
| chr12 | 98920711 | 98921027 |
| chr12 | 98949951 | 98950105 |

|       |          |          |
|-------|----------|----------|
| chr12 | 98965619 | 98966174 |
| chr12 | 98974056 | 98974740 |
| chr12 | 98977108 | 98977385 |
| chr12 | 98991157 | 98991456 |
| chr12 | 98991456 | 98991673 |
| chr12 | 98993763 | 98994058 |
| chr12 | 98994402 | 98994744 |
| chr12 | 98994751 | 98994901 |
| chr12 | 98995985 | 98996200 |
| chr12 | 98996539 | 98996855 |
| chr12 | 99040186 | 99040582 |
| chr12 | 99050505 | 99050685 |
| chr12 | 99052400 | 99052550 |
| chr12 | 99052556 | 99052983 |
| chr12 | 99059491 | 99059835 |
| chr12 | 99063807 | 99064319 |
| chr12 | 99084130 | 99084582 |
| chr12 | 99090135 | 99090345 |
| chr12 | 99090345 | 99090632 |
| chr12 | 99096934 | 99097253 |
| chr12 | 99097268 | 99097572 |
| chr12 | 99183306 | 99183728 |
| chr12 | 99197004 | 99197159 |
| chr12 | 99213458 | 99213756 |
| chr12 | 99267685 | 99268184 |
| chr12 | 99329375 | 99329555 |
| chr12 | 99336483 | 99337070 |
| chr12 | 99338421 | 99338672 |
| chr12 | 99338801 | 99339285 |
| chr12 | 99339996 | 99340232 |
| chr12 | 99340764 | 99341280 |
| chr12 | 99347048 | 99347310 |
| chr12 | 99351777 | 99352049 |
| chr12 | 99352183 | 99352494 |
| chr12 | 99352726 | 99353003 |
| chr12 | 99353047 | 99353206 |
| chr12 | 99356481 | 99357035 |
| chr12 | 99357035 | 99357399 |
| chr12 | 99358353 | 99358527 |
| chr12 | 99362772 | 99362977 |
| chr12 | 99366124 | 99366326 |
| chr12 | 99367707 | 99367864 |



|       |          |          |
|-------|----------|----------|
| chr12 | 99370885 | 99371072 |
| chr12 | 99371721 | 99371899 |
| chr12 | 99375378 | 99375552 |
| chr12 | 99375909 | 99376159 |
| chr12 | 99376954 | 99377153 |
| chr12 | 99377173 | 99377744 |
| chr12 | 99386562 | 99386712 |
| chr12 | 99391953 | 99392530 |
| chr12 | 99392552 | 99392878 |
| chr12 | 99392878 | 99393121 |
| chr12 | 99393121 | 99393382 |
| chr12 | 99393382 | 99393679 |
| chr12 | 99393679 | 99393967 |
| chr12 | 99394246 | 99394405 |
| chr12 | 99406350 | 99406604 |
| chr12 | 99407449 | 99407635 |
| chr12 | 99426649 | 99426840 |
| chr12 | 99464221 | 99464593 |
| chr12 | 99504873 | 99505025 |
| chr12 | 99505154 | 99505337 |
| chr12 | 99506475 | 99506693 |
| chr12 | 99506693 | 99506808 |
| chr12 | 99562229 | 99562445 |
| chr12 | 99562445 | 99562679 |
| chr12 | 99563338 | 99563787 |
| chr12 | 99563787 | 99564011 |
| chr12 | 99627637 | 99628347 |
| chr12 | 99638038 | 99638509 |
| chr12 | 99638994 | 99639621 |
| chr12 | 99645056 | 99645392 |
| chr12 | 99645392 | 99645746 |
| chr12 | 99681729 | 99682021 |
| chr12 | 99686716 | 99686968 |
| chr12 | 99705294 | 99705454 |
| chr12 | 99705454 | 99705632 |
| chr12 | 99738197 | 99738623 |
| chr12 | 99739130 | 99739375 |
| chr12 | 99749361 | 99749706 |
| chr12 | 99836509 | 99836659 |
| chr12 | 99842854 | 99843039 |
| chr12 | 99883110 | 99883337 |
| chr12 | 99883337 | 99883692 |

|       |           |           |
|-------|-----------|-----------|
| chr12 | 99883806  | 99884065  |
| chr12 | 99884304  | 99885049  |
| chr12 | 99895167  | 99895372  |
| chr12 | 99900133  | 99900385  |
| chr12 | 99904313  | 99904490  |
| chr12 | 99906147  | 99906456  |
| chr12 | 99906469  | 99906853  |
| chr12 | 99917818  | 99918062  |
| chr12 | 99921210  | 99921372  |
| chr12 | 99925268  | 99925656  |
| chr12 | 99926989  | 99927241  |
| chr12 | 99927852  | 99928256  |
| chr12 | 99932243  | 99932547  |
| chr12 | 99941726  | 99942060  |
| chr12 | 99942650  | 99943252  |
| chr12 | 99943252  | 99943521  |
| chr12 | 99953044  | 99953217  |
| chr12 | 99964319  | 99964591  |
| chr12 | 99964591  | 99964835  |
| chr12 | 99964886  | 99965488  |
| chr12 | 99965694  | 99965930  |
| chr12 | 99965930  | 99966163  |
| chr12 | 99979641  | 99979952  |
| chr12 | 100016639 | 100016966 |
| chr12 | 100025942 | 100026135 |
| chr12 | 100026216 | 100026525 |
| chr12 | 100026923 | 100027109 |
| chr12 | 100036111 | 100036286 |
| chr12 | 100044798 | 100045121 |
| chr12 | 100045426 | 100045728 |
| chr12 | 100056080 | 100056408 |
| chr12 | 100096843 | 100097235 |
| chr12 | 100100456 | 100100619 |
| chr12 | 100106387 | 100106537 |
| chr12 | 100107460 | 100107695 |
| chr12 | 100109979 | 100110509 |
| chr12 | 100110509 | 100110989 |
| chr12 | 100117026 | 100117194 |
| chr12 | 100122931 | 100123130 |
| chr12 | 100125032 | 100125287 |
| chr12 | 100129876 | 100130392 |
| chr12 | 100131767 | 100131944 |

|       |           |           |
|-------|-----------|-----------|
| chr12 | 100159281 | 100159539 |
| chr12 | 100159539 | 100159962 |
| chr12 | 100166233 | 100166637 |
| chr12 | 100166961 | 100167196 |
| chr12 | 100167931 | 100168254 |
| chr12 | 100168256 | 100168514 |
| chr12 | 100175166 | 100175663 |
| chr12 | 100175761 | 100175951 |
| chr12 | 100183765 | 100184090 |
| chr12 | 100184090 | 100184381 |
| chr12 | 100187149 | 100187328 |
| chr12 | 100187348 | 100187878 |
| chr12 | 100193198 | 100193410 |
| chr12 | 100194251 | 100194461 |
| chr12 | 100199053 | 100199362 |
| chr12 | 100199362 | 100199803 |
| chr12 | 100199865 | 100200196 |
| chr12 | 100200196 | 100200590 |
| chr12 | 100200590 | 100200978 |
| chr12 | 100201843 | 100202197 |
| chr12 | 100210784 | 100211431 |
| chr12 | 100219883 | 100220351 |
| chr12 | 100220351 | 100220639 |
| chr12 | 100225317 | 100225525 |
| chr12 | 100235004 | 100235384 |
| chr12 | 100235459 | 100235878 |
| chr12 | 100238116 | 100238332 |
| chr12 | 100242389 | 100242643 |
| chr12 | 100255552 | 100255873 |
| chr12 | 100257783 | 100258206 |
| chr12 | 100262995 | 100263188 |
| chr12 | 100268095 | 100268316 |
| chr12 | 100270335 | 100270575 |
| chr12 | 100272944 | 100273457 |
| chr12 | 100275838 | 100276207 |
| chr12 | 100276950 | 100277249 |
| chr12 | 100279822 | 100280324 |
| chr12 | 100281132 | 100281852 |
| chr12 | 100282293 | 100282685 |
| chr12 | 100288822 | 100289034 |
| chr12 | 100289647 | 100290079 |
| chr12 | 100296925 | 100297075 |

|       |           |           |
|-------|-----------|-----------|
| chr12 | 100299114 | 100299721 |
| chr12 | 100302122 | 100302567 |
| chr12 | 100304334 | 100304542 |
| chr12 | 100305108 | 100305356 |
| chr12 | 100307558 | 100307823 |
| chr12 | 100312988 | 100313296 |
| chr12 | 100313296 | 100313627 |
| chr12 | 100313646 | 100313874 |
| chr12 | 100313878 | 100314028 |
| chr12 | 100315188 | 100315423 |
| chr12 | 100326596 | 100327086 |
| chr12 | 100327086 | 100327324 |
| chr12 | 100337278 | 100337713 |
| chr12 | 100337713 | 100338042 |
| chr12 | 100338166 | 100338427 |
| chr12 | 100349643 | 100349838 |
| chr12 | 100353513 | 100353784 |
| chr12 | 100353916 | 100354409 |
| chr12 | 100355703 | 100356062 |
| chr12 | 100361574 | 100361724 |
| chr12 | 100369246 | 100369594 |
| chr12 | 100369884 | 100370065 |
| chr12 | 100372125 | 100372294 |
| chr12 | 100372758 | 100373204 |
| chr12 | 100378293 | 100378622 |
| chr12 | 100378650 | 100378933 |
| chr12 | 100379310 | 100379482 |
| chr12 | 100379807 | 100380138 |
| chr12 | 100396875 | 100397274 |
| chr12 | 100420082 | 100420288 |
| chr12 | 100421615 | 100421832 |
| chr12 | 100426286 | 100426498 |
| chr12 | 100431890 | 100432213 |
| chr12 | 100432213 | 100432500 |
| chr12 | 100439173 | 100439473 |
| chr12 | 100439520 | 100439884 |
| chr12 | 100439962 | 100440204 |
| chr12 | 100445003 | 100445373 |
| chr12 | 100445412 | 100445622 |
| chr12 | 100447184 | 100447448 |
| chr12 | 100455497 | 100455887 |
| chr12 | 100456281 | 100456562 |

|       |           |           |
|-------|-----------|-----------|
| chr12 | 100465206 | 100465622 |
| chr12 | 100465834 | 100466162 |
| chr12 | 100479947 | 100480265 |
| chr12 | 100486320 | 100486478 |
| chr12 | 100494281 | 100494568 |
| chr12 | 100519574 | 100520119 |
| chr12 | 100520282 | 100520519 |
| chr12 | 100520519 | 100520766 |
| chr12 | 100520766 | 100521205 |
| chr12 | 100524789 | 100525097 |
| chr12 | 100525983 | 100526462 |
| chr12 | 100529263 | 100529488 |
| chr12 | 100538544 | 100538780 |
| chr12 | 100578364 | 100578520 |
| chr12 | 100604612 | 100604872 |
| chr12 | 100606842 | 100607037 |
| chr12 | 100724627 | 100724957 |
| chr12 | 100724957 | 100725270 |
| chr12 | 100725270 | 100725622 |
| chr12 | 100735349 | 100735514 |
| chr12 | 100778967 | 100779251 |
| chr12 | 100841296 | 100841538 |
| chr12 | 100841538 | 100841727 |
| chr12 | 100849327 | 100849941 |
| chr12 | 100855533 | 100856015 |
| chr12 | 100857869 | 100858077 |
| chr12 | 100862361 | 100862539 |
| chr12 | 100882470 | 100882662 |
| chr12 | 100883274 | 100883440 |
| chr12 | 100898206 | 100898628 |
| chr12 | 100898907 | 100899643 |
| chr12 | 100903807 | 100904128 |
| chr12 | 100907993 | 100908306 |
| chr12 | 100926302 | 100926586 |
| chr12 | 100927108 | 100927551 |
| chr12 | 100928352 | 100928668 |
| chr12 | 100936123 | 100936566 |
| chr12 | 100936649 | 100936907 |
| chr12 | 100937661 | 100937847 |
| chr12 | 100951937 | 100952172 |
| chr12 | 100952195 | 100952494 |
| chr12 | 100952583 | 100952989 |

|       |           |           |
|-------|-----------|-----------|
| chr12 | 100958035 | 100958474 |
| chr12 | 100958723 | 100958965 |
| chr12 | 100959274 | 100959428 |
| chr12 | 100964034 | 100964224 |
| chr12 | 100975885 | 100976102 |
| chr12 | 100982123 | 100982688 |
| chr12 | 100985225 | 100985398 |
| chr12 | 100993186 | 100993392 |
| chr12 | 100994192 | 100994464 |
| chr12 | 100994592 | 100995013 |
| chr12 | 100996600 | 100996750 |
| chr12 | 100997769 | 100998015 |
| chr12 | 100998015 | 100998546 |
| chr12 | 101002787 | 101003062 |
| chr12 | 101003186 | 101003392 |
| chr12 | 101004866 | 101005045 |
| chr12 | 101008249 | 101008452 |
| chr12 | 101016058 | 101016214 |
| chr12 | 101016495 | 101016843 |
| chr12 | 101016843 | 101017062 |
| chr12 | 101017062 | 101017247 |
| chr12 | 101017977 | 101018268 |
| chr12 | 101026638 | 101026844 |
| chr12 | 101027430 | 101027854 |
| chr12 | 101028704 | 101029235 |
| chr12 | 101029235 | 101029499 |
| chr12 | 101029499 | 101029763 |
| chr12 | 101063385 | 101063546 |
| chr12 | 101078059 | 101078234 |
| chr12 | 101082584 | 101083058 |
| chr12 | 101083058 | 101083465 |
| chr12 | 101083465 | 101083854 |
| chr12 | 101083854 | 101084136 |
| chr12 | 101102668 | 101102990 |
| chr12 | 101109699 | 101110099 |
| chr12 | 101245810 | 101246014 |
| chr12 | 101268142 | 101268516 |
| chr12 | 101284203 | 101284400 |
| chr12 | 101300029 | 101300252 |
| chr12 | 101343197 | 101343375 |
| chr12 | 101343592 | 101343791 |
| chr12 | 101344403 | 101344680 |

|       |           |           |
|-------|-----------|-----------|
| chr12 | 101344680 | 101345015 |
| chr12 | 101463267 | 101463486 |
| chr12 | 101477981 | 101478492 |
| chr12 | 101483428 | 101483964 |
| chr12 | 101717991 | 101718342 |
| chr12 | 101718342 | 101718738 |
| chr12 | 101718738 | 101719070 |
| chr12 | 101764839 | 101765246 |
| chr12 | 101765439 | 101765725 |
| chr12 | 101767364 | 101767656 |
| chr12 | 101782949 | 101783194 |
| chr12 | 101816885 | 101817146 |
| chr12 | 101818713 | 101818962 |
| chr12 | 101818962 | 101819303 |
| chr12 | 101839854 | 101840085 |
| chr12 | 101840085 | 101840277 |
| chr12 | 101840277 | 101840476 |
| chr12 | 101840711 | 101841097 |
| chr12 | 101841210 | 101841714 |
| chr12 | 101841714 | 101841974 |
| chr12 | 101875258 | 101875408 |
| chr12 | 101876395 | 101876825 |
| chr12 | 101892904 | 101893250 |
| chr12 | 101907434 | 101907584 |
| chr12 | 101912404 | 101912806 |
| chr12 | 101912806 | 101913053 |
| chr12 | 101913053 | 101913545 |
| chr12 | 101957742 | 101958127 |
| chr12 | 101958127 | 101958505 |
| chr12 | 101975324 | 101975603 |
| chr12 | 101975603 | 101975851 |
| chr12 | 101975851 | 101976091 |
| chr12 | 101976091 | 101976664 |
| chr12 | 102036055 | 102036264 |
| chr12 | 102036264 | 102036479 |
| chr12 | 102066616 | 102066794 |
| chr12 | 102069951 | 102070109 |
| chr12 | 102080796 | 102081041 |
| chr12 | 102128937 | 102129218 |
| chr12 | 102134776 | 102134927 |
| chr12 | 102148823 | 102149075 |
| chr12 | 102157108 | 102157343 |

|       |           |           |
|-------|-----------|-----------|
| chr12 | 102181882 | 102182112 |
| chr12 | 102182112 | 102182315 |
| chr12 | 102190728 | 102191449 |
| chr12 | 102201963 | 102202409 |
| chr12 | 102202858 | 102203322 |
| chr12 | 102223536 | 102223793 |
| chr12 | 102242119 | 102242605 |
| chr12 | 102261776 | 102262188 |
| chr12 | 102262188 | 102262490 |
| chr12 | 102262706 | 102263195 |
| chr12 | 102263807 | 102263999 |
| chr12 | 102266733 | 102266953 |
| chr12 | 102271434 | 102271685 |
| chr12 | 102280403 | 102280658 |
| chr12 | 102281366 | 102281563 |
| chr12 | 102282722 | 102283296 |
| chr12 | 102283296 | 102283512 |
| chr12 | 102283549 | 102283846 |
| chr12 | 102283846 | 102284068 |
| chr12 | 102284068 | 102284264 |
| chr12 | 102286649 | 102287038 |
| chr12 | 102295204 | 102295672 |
| chr12 | 102299164 | 102299664 |
| chr12 | 102299664 | 102300043 |
| chr12 | 102309733 | 102310181 |
| chr12 | 102319982 | 102320221 |
| chr12 | 102326163 | 102326632 |
| chr12 | 102326956 | 102327179 |
| chr12 | 102327694 | 102327874 |
| chr12 | 102328068 | 102328500 |
| chr12 | 102331915 | 102332169 |
| chr12 | 102337875 | 102338133 |
| chr12 | 102339117 | 102339308 |
| chr12 | 102340437 | 102340701 |
| chr12 | 102341596 | 102341775 |
| chr12 | 102346585 | 102346814 |
| chr12 | 102359511 | 102359742 |
| chr12 | 102375638 | 102375907 |
| chr12 | 102381558 | 102381717 |
| chr12 | 102384935 | 102385177 |
| chr12 | 102387279 | 102387576 |
| chr12 | 102390136 | 102390338 |



|       |           |           |
|-------|-----------|-----------|
| chr12 | 102392028 | 102392298 |
| chr12 | 102394453 | 102394849 |
| chr12 | 102396020 | 102396170 |
| chr12 | 102397433 | 102397724 |
| chr12 | 102413393 | 102413640 |
| chr12 | 102416343 | 102416641 |
| chr12 | 102416649 | 102416809 |
| chr12 | 102417743 | 102418053 |
| chr12 | 102420569 | 102420738 |
| chr12 | 102422058 | 102422420 |
| chr12 | 102426288 | 102426701 |
| chr12 | 102431931 | 102432581 |
| chr12 | 102432581 | 102432908 |
| chr12 | 102433214 | 102433559 |
| chr12 | 102438225 | 102438389 |
| chr12 | 102439362 | 102439610 |
| chr12 | 102439610 | 102440095 |
| chr12 | 102461303 | 102461629 |
| chr12 | 102468812 | 102469127 |
| chr12 | 102469127 | 102469365 |
| chr12 | 102469365 | 102469718 |
| chr12 | 102499819 | 102500023 |
| chr12 | 102524810 | 102525088 |
| chr12 | 102550603 | 102550848 |
| chr12 | 102554945 | 102555366 |
| chr12 | 102566837 | 102567184 |
| chr12 | 102570792 | 102571018 |
| chr12 | 102576804 | 102576965 |
| chr12 | 102577032 | 102577582 |
| chr12 | 102579123 | 102579355 |
| chr12 | 102588490 | 102588712 |
| chr12 | 102590777 | 102591024 |
| chr12 | 102593862 | 102594036 |
| chr12 | 102596546 | 102596721 |
| chr12 | 102630564 | 102630760 |
| chr12 | 102640580 | 102640791 |
| chr12 | 102643450 | 102643617 |
| chr12 | 102647838 | 102648266 |
| chr12 | 102648314 | 102648472 |
| chr12 | 102652553 | 102652845 |
| chr12 | 102653113 | 102653312 |
| chr12 | 102665846 | 102666104 |

|       |           |           |
|-------|-----------|-----------|
| chr12 | 102668326 | 102668619 |
| chr12 | 102680901 | 102681069 |
| chr12 | 102684348 | 102684634 |
| chr12 | 102704271 | 102704421 |
| chr12 | 102704437 | 102704810 |
| chr12 | 102704810 | 102705216 |
| chr12 | 102705216 | 102705820 |
| chr12 | 102719611 | 102719936 |
| chr12 | 102723131 | 102723281 |
| chr12 | 102724791 | 102725019 |
| chr12 | 102725113 | 102725485 |
| chr12 | 102725689 | 102726089 |
| chr12 | 102730295 | 102730817 |
| chr12 | 102730888 | 102731164 |
| chr12 | 102731183 | 102731608 |
| chr12 | 102731608 | 102731854 |
| chr12 | 102733446 | 102733708 |
| chr12 | 102737625 | 102737947 |
| chr12 | 102743285 | 102743573 |
| chr12 | 102743573 | 102743848 |
| chr12 | 102743848 | 102744130 |
| chr12 | 102744264 | 102744455 |
| chr12 | 102744918 | 102745162 |
| chr12 | 102757415 | 102758022 |
| chr12 | 102758022 | 102758424 |
| chr12 | 102764909 | 102765148 |
| chr12 | 102769148 | 102769304 |
| chr12 | 102779515 | 102779741 |
| chr12 | 102877092 | 102877308 |
| chr12 | 102877308 | 102877518 |
| chr12 | 102877518 | 102877804 |
| chr12 | 102877804 | 102878089 |
| chr12 | 102878089 | 102878330 |
| chr12 | 102878330 | 102878839 |
| chr12 | 102885854 | 102886005 |
| chr12 | 102892897 | 102893088 |
| chr12 | 102949586 | 102949869 |
| chr12 | 102957364 | 102957569 |
| chr12 | 102960956 | 102961396 |
| chr12 | 103000301 | 103000463 |
| chr12 | 103065039 | 103065272 |
| chr12 | 103099196 | 103099561 |

|       |           |           |
|-------|-----------|-----------|
| chr12 | 103144194 | 103144486 |
| chr12 | 103183129 | 103183327 |
| chr12 | 103281426 | 103281659 |
| chr12 | 103305228 | 103305420 |
| chr12 | 103322864 | 103323097 |
| chr12 | 103325282 | 103325868 |
| chr12 | 103327670 | 103327841 |
| chr12 | 103328838 | 103329157 |
| chr12 | 103340594 | 103340931 |
| chr12 | 103340931 | 103341322 |
| chr12 | 103341322 | 103341710 |
| chr12 | 103347033 | 103347308 |
| chr12 | 103348396 | 103348603 |
| chr12 | 103348603 | 103348868 |
| chr12 | 103353693 | 103353927 |
| chr12 | 103366256 | 103366533 |
| chr12 | 103367928 | 103368167 |
| chr12 | 103368167 | 103368373 |
| chr12 | 103371803 | 103372045 |
| chr12 | 103376707 | 103377173 |
| chr12 | 103380378 | 103380637 |
| chr12 | 103380730 | 103381058 |
| chr12 | 103383387 | 103383779 |
| chr12 | 103388464 | 103389139 |
| chr12 | 103393725 | 103393940 |
| chr12 | 103395533 | 103395907 |
| chr12 | 103402918 | 103403086 |
| chr12 | 103408643 | 103409052 |
| chr12 | 103425464 | 103425775 |
| chr12 | 103425775 | 103426389 |
| chr12 | 103434084 | 103434339 |
| chr12 | 103452621 | 103452856 |
| chr12 | 103453407 | 103453610 |
| chr12 | 103456823 | 103457025 |
| chr12 | 103457038 | 103457443 |
| chr12 | 103492836 | 103493173 |
| chr12 | 103494529 | 103494786 |
| chr12 | 103507210 | 103507441 |
| chr12 | 103508418 | 103508570 |
| chr12 | 103518614 | 103519015 |
| chr12 | 103531980 | 103532593 |
| chr12 | 103532593 | 103533012 |

|       |           |           |
|-------|-----------|-----------|
| chr12 | 103533012 | 103533292 |
| chr12 | 103542419 | 103542585 |
| chr12 | 103544198 | 103544432 |
| chr12 | 103548647 | 103548855 |
| chr12 | 103561148 | 103561324 |
| chr12 | 103564742 | 103565011 |
| chr12 | 103565121 | 103565510 |
| chr12 | 103567279 | 103567429 |
| chr12 | 103568347 | 103568521 |
| chr12 | 103590774 | 103590982 |
| chr12 | 103643420 | 103643655 |
| chr12 | 103665140 | 103665476 |
| chr12 | 103681998 | 103682202 |
| chr12 | 103683785 | 103684219 |
| chr12 | 103711679 | 103711829 |
| chr12 | 103887288 | 103887536 |
| chr12 | 103888276 | 103888556 |
| chr12 | 103985064 | 103985239 |
| chr12 | 103993026 | 103993259 |
| chr12 | 103995381 | 103995612 |
| chr12 | 103996094 | 103996294 |
| chr12 | 103996404 | 103996827 |
| chr12 | 104000567 | 104000774 |
| chr12 | 104000774 | 104000984 |
| chr12 | 104002528 | 104003162 |
| chr12 | 104003204 | 104003595 |
| chr12 | 104030086 | 104030251 |
| chr12 | 104054021 | 104054192 |
| chr12 | 104055724 | 104056180 |
| chr12 | 104057077 | 104057377 |
| chr12 | 104057620 | 104057869 |
| chr12 | 104061740 | 104061993 |
| chr12 | 104061993 | 104062245 |
| chr12 | 104063319 | 104063494 |
| chr12 | 104064574 | 104064881 |
| chr12 | 104065003 | 104065421 |
| chr12 | 104069745 | 104069959 |
| chr12 | 104076169 | 104076634 |
| chr12 | 104123891 | 104124295 |
| chr12 | 104186297 | 104186683 |
| chr12 | 104190906 | 104191162 |
| chr12 | 104223030 | 104223315 |

|       |           |           |
|-------|-----------|-----------|
| chr12 | 104223315 | 104223617 |
| chr12 | 104223687 | 104224060 |
| chr12 | 104224302 | 104224578 |
| chr12 | 104256621 | 104256802 |
| chr12 | 104270302 | 104270452 |
| chr12 | 104271282 | 104271555 |
| chr12 | 104271555 | 104271903 |
| chr12 | 104415481 | 104416165 |
| chr12 | 104419238 | 104419388 |
| chr12 | 104422722 | 104423043 |
| chr12 | 104427059 | 104427234 |
| chr12 | 104440107 | 104440392 |
| chr12 | 104442300 | 104442775 |
| chr12 | 104472048 | 104472257 |
| chr12 | 104472683 | 104473161 |
| chr12 | 104473168 | 104473493 |
| chr12 | 104548623 | 104548915 |
| chr12 | 104548915 | 104549174 |
| chr12 | 104573791 | 104573994 |
| chr12 | 104608694 | 104608844 |
| chr12 | 104608986 | 104609298 |
| chr12 | 104644798 | 104645059 |
| chr12 | 104666117 | 104666282 |
| chr12 | 104680899 | 104681085 |
| chr12 | 104684601 | 104684754 |
| chr12 | 104697904 | 104698157 |
| chr12 | 104751341 | 104751824 |
| chr12 | 104751824 | 104752459 |
| chr12 | 104752477 | 104752725 |
| chr12 | 104811020 | 104811249 |
| chr12 | 104811866 | 104812029 |
| chr12 | 104812800 | 104812967 |
| chr12 | 104823758 | 104823945 |
| chr12 | 104824575 | 104824977 |
| chr12 | 104829866 | 104830191 |
| chr12 | 104833542 | 104833695 |
| chr12 | 104835447 | 104835873 |
| chr12 | 104844436 | 104844590 |
| chr12 | 104844747 | 104845047 |
| chr12 | 104845047 | 104845333 |
| chr12 | 104845335 | 104845701 |
| chr12 | 104845701 | 104846258 |

|       |           |           |
|-------|-----------|-----------|
| chr12 | 104850712 | 104851068 |
| chr12 | 104855548 | 104855784 |
| chr12 | 104856133 | 104856326 |
| chr12 | 104856625 | 104856885 |
| chr12 | 104864368 | 104864763 |
| chr12 | 104864763 | 104865240 |
| chr12 | 104866780 | 104867000 |
| chr12 | 104867400 | 104867658 |
| chr12 | 104875870 | 104876087 |
| chr12 | 104876087 | 104876423 |
| chr12 | 104881583 | 104881899 |
| chr12 | 104882098 | 104882417 |
| chr12 | 104888733 | 104888932 |
| chr12 | 104896839 | 104897021 |
| chr12 | 104897049 | 104897367 |
| chr12 | 104897367 | 104897795 |
| chr12 | 104898750 | 104899059 |
| chr12 | 104903930 | 104904642 |
| chr12 | 104907237 | 104907434 |
| chr12 | 104917346 | 104917765 |
| chr12 | 104919338 | 104919613 |
| chr12 | 104933312 | 104933545 |
| chr12 | 104936317 | 104936540 |
| chr12 | 104938924 | 104939171 |
| chr12 | 104939743 | 104940061 |
| chr12 | 104940076 | 104940227 |
| chr12 | 104951336 | 104951816 |
| chr12 | 104952504 | 104952774 |
| chr12 | 104953976 | 104954249 |
| chr12 | 104954963 | 104955374 |
| chr12 | 104960076 | 104960308 |
| chr12 | 104968216 | 104968479 |
| chr12 | 104969249 | 104969410 |
| chr12 | 104969516 | 104970032 |
| chr12 | 104972885 | 104973235 |
| chr12 | 104978474 | 104978627 |
| chr12 | 104983213 | 104983730 |
| chr12 | 104983730 | 104983995 |
| chr12 | 104983995 | 104984317 |
| chr12 | 104986549 | 104986778 |
| chr12 | 104986778 | 104987088 |
| chr12 | 104990727 | 104991151 |

|       |           |           |
|-------|-----------|-----------|
| chr12 | 104991151 | 104991492 |
| chr12 | 104992414 | 104992669 |
| chr12 | 104996027 | 104996361 |
| chr12 | 104999266 | 104999433 |
| chr12 | 105000111 | 105000408 |
| chr12 | 105000573 | 105000908 |
| chr12 | 105000908 | 105001331 |
| chr12 | 105001367 | 105001623 |
| chr12 | 105005472 | 105005835 |
| chr12 | 105008736 | 105009205 |
| chr12 | 105009462 | 105009704 |
| chr12 | 105009704 | 105009944 |
| chr12 | 105009944 | 105010306 |
| chr12 | 105016657 | 105016842 |
| chr12 | 105019933 | 105020278 |
| chr12 | 105025308 | 105025569 |
| chr12 | 105026293 | 105026566 |
| chr12 | 105027792 | 105027958 |
| chr12 | 105032120 | 105032720 |
| chr12 | 105032720 | 105033169 |
| chr12 | 105033179 | 105033358 |
| chr12 | 105039602 | 105039767 |
| chr12 | 105039960 | 105040110 |
| chr12 | 105043154 | 105043358 |
| chr12 | 105044792 | 105044980 |
| chr12 | 105047572 | 105047838 |
| chr12 | 105048587 | 105048757 |
| chr12 | 105048757 | 105048931 |
| chr12 | 105050979 | 105051211 |
| chr12 | 105068995 | 105069229 |
| chr12 | 105073769 | 105073976 |
| chr12 | 105104137 | 105104358 |
| chr12 | 105129605 | 105129807 |
| chr12 | 105145033 | 105145240 |
| chr12 | 105174382 | 105174639 |
| chr12 | 105189041 | 105189277 |
| chr12 | 105322172 | 105322592 |
| chr12 | 105404739 | 105404928 |
| chr12 | 105420534 | 105420814 |
| chr12 | 105426629 | 105426901 |
| chr12 | 105427420 | 105427735 |
| chr12 | 105436045 | 105436300 |

|       |           |           |
|-------|-----------|-----------|
| chr12 | 105451896 | 105452088 |
| chr12 | 105453736 | 105454124 |
| chr12 | 105455165 | 105455615 |
| chr12 | 105455766 | 105455967 |
| chr12 | 105466952 | 105467261 |
| chr12 | 105467955 | 105468156 |
| chr12 | 105475531 | 105475776 |
| chr12 | 105476538 | 105476815 |
| chr12 | 105483592 | 105483820 |
| chr12 | 105488942 | 105489116 |
| chr12 | 105489751 | 105489902 |
| chr12 | 105492377 | 105492614 |
| chr12 | 105497744 | 105497970 |
| chr12 | 105497970 | 105498205 |
| chr12 | 105498205 | 105498392 |
| chr12 | 105498500 | 105498729 |
| chr12 | 105498828 | 105499207 |
| chr12 | 105499207 | 105499518 |
| chr12 | 105510196 | 105510382 |
| chr12 | 105510703 | 105510917 |
| chr12 | 105511163 | 105511463 |
| chr12 | 105514199 | 105514472 |
| chr12 | 105517092 | 105517276 |
| chr12 | 105523737 | 105524202 |
| chr12 | 105524671 | 105524897 |
| chr12 | 105525085 | 105525368 |
| chr12 | 105525368 | 105525625 |
| chr12 | 105529638 | 105529892 |
| chr12 | 105534948 | 105535135 |
| chr12 | 105536886 | 105537163 |
| chr12 | 105537163 | 105537719 |
| chr12 | 105543782 | 105544142 |
| chr12 | 105546104 | 105546560 |
| chr12 | 105546637 | 105546876 |
| chr12 | 105547227 | 105547387 |
| chr12 | 105548011 | 105548262 |
| chr12 | 105548262 | 105548555 |
| chr12 | 105548984 | 105549273 |
| chr12 | 105549941 | 105550097 |
| chr12 | 105551392 | 105551684 |
| chr12 | 105551684 | 105551980 |
| chr12 | 105554104 | 105554456 |



|       |           |           |
|-------|-----------|-----------|
| chr12 | 105554456 | 105554778 |
| chr12 | 105555277 | 105555531 |
| chr12 | 105557249 | 105557614 |
| chr12 | 105557669 | 105557871 |
| chr12 | 105562093 | 105562395 |
| chr12 | 105562932 | 105563301 |
| chr12 | 105563307 | 105563457 |
| chr12 | 105563854 | 105564226 |
| chr12 | 105564558 | 105564740 |
| chr12 | 105565249 | 105565606 |
| chr12 | 105571688 | 105572163 |
| chr12 | 105572734 | 105573036 |
| chr12 | 105573036 | 105573283 |
| chr12 | 105573854 | 105574024 |
| chr12 | 105583387 | 105583832 |
| chr12 | 105584904 | 105585204 |
| chr12 | 105590443 | 105590746 |
| chr12 | 105595730 | 105595905 |
| chr12 | 105596214 | 105596490 |
| chr12 | 105596719 | 105596905 |
| chr12 | 105597015 | 105597169 |
| chr12 | 105597278 | 105597430 |
| chr12 | 105602485 | 105602739 |
| chr12 | 105603650 | 105603826 |
| chr12 | 105611790 | 105612042 |
| chr12 | 105614782 | 105614937 |
| chr12 | 105684048 | 105684198 |
| chr12 | 105684300 | 105684555 |
| chr12 | 105684555 | 105684975 |
| chr12 | 105684975 | 105685429 |
| chr12 | 105685429 | 105685792 |
| chr12 | 105685871 | 105686036 |
| chr12 | 105687569 | 105687740 |
| chr12 | 105705862 | 105706154 |
| chr12 | 105718519 | 105718989 |
| chr12 | 105722747 | 105722995 |
| chr12 | 105730860 | 105731132 |
| chr12 | 105731132 | 105731412 |
| chr12 | 105734238 | 105734565 |
| chr12 | 105748136 | 105748361 |
| chr12 | 105784150 | 105784594 |
| chr12 | 105784594 | 105784816 |

|       |           |           |
|-------|-----------|-----------|
| chr12 | 105784816 | 105785049 |
| chr12 | 105785049 | 105785375 |
| chr12 | 105793915 | 105794156 |
| chr12 | 105805800 | 105806085 |
| chr12 | 105809082 | 105809234 |
| chr12 | 105814044 | 105814283 |
| chr12 | 105839186 | 105839346 |
| chr12 | 105840633 | 105840833 |
| chr12 | 105843701 | 105843904 |
| chr12 | 105847659 | 105847813 |
| chr12 | 105854687 | 105854990 |
| chr12 | 105882454 | 105882606 |
| chr12 | 105882903 | 105883167 |
| chr12 | 105906683 | 105906988 |
| chr12 | 105923940 | 105924115 |
| chr12 | 105962551 | 105963024 |
| chr12 | 105963024 | 105963375 |
| chr12 | 105976602 | 105976773 |
| chr12 | 106001878 | 106002120 |
| chr12 | 106009973 | 106010846 |
| chr12 | 106025574 | 106025797 |
| chr12 | 106046048 | 106046249 |
| chr12 | 106046249 | 106046476 |
| chr12 | 106046476 | 106046734 |
| chr12 | 106055857 | 106056147 |
| chr12 | 106094935 | 106095085 |
| chr12 | 106098963 | 106099198 |
| chr12 | 106105480 | 106105673 |
| chr12 | 106115906 | 106116199 |
| chr12 | 106168547 | 106169141 |
| chr12 | 106174142 | 106174408 |
| chr12 | 106177024 | 106177345 |
| chr12 | 106177345 | 106177814 |
| chr12 | 106300876 | 106301028 |
| chr12 | 106513136 | 106513379 |
| chr12 | 106513379 | 106513810 |
| chr12 | 106568907 | 106569179 |
| chr12 | 106600885 | 106601050 |
| chr12 | 106764482 | 106764811 |
| chr12 | 106849753 | 106849913 |
| chr12 | 106972370 | 106972531 |
| chr12 | 107530769 | 107530991 |

|       |           |           |
|-------|-----------|-----------|
| chr12 | 107531079 | 107531352 |
| chr12 | 107561194 | 107561534 |
| chr12 | 107617268 | 107617550 |
| chr12 | 107645164 | 107645468 |
| chr12 | 107645468 | 107645865 |
| chr12 | 107646737 | 107647046 |
| chr12 | 107669967 | 107670235 |
| chr12 | 107693708 | 107694086 |
| chr12 | 107712288 | 107712438 |
| chr12 | 107752230 | 107752488 |
| chr12 | 107752672 | 107752895 |
| chr12 | 107753118 | 107753298 |
| chr12 | 107807508 | 107808087 |
| chr12 | 107856550 | 107856748 |
| chr12 | 107856748 | 107857004 |
| chr12 | 107878464 | 107878621 |
| chr12 | 107880105 | 107880316 |
| chr12 | 107998820 | 107999063 |
| chr12 | 108003913 | 108004326 |
| chr12 | 108006187 | 108006442 |
| chr12 | 108041630 | 108041898 |
| chr12 | 108042012 | 108042205 |
| chr12 | 108059522 | 108059701 |
| chr12 | 108078179 | 108078473 |
| chr12 | 108083275 | 108083430 |
| chr12 | 108094769 | 108095133 |
| chr12 | 108098235 | 108098496 |
| chr12 | 108105237 | 108105506 |
| chr12 | 108109800 | 108110124 |
| chr12 | 108110212 | 108110395 |
| chr12 | 108117545 | 108117824 |
| chr12 | 108121374 | 108121621 |
| chr12 | 108152875 | 108153035 |
| chr12 | 108159961 | 108160147 |
| chr12 | 108162135 | 108162350 |
| chr12 | 108178383 | 108178604 |
| chr12 | 108178740 | 108179150 |
| chr12 | 108179150 | 108180087 |
| chr12 | 108199629 | 108199784 |
| chr12 | 108200170 | 108200325 |
| chr12 | 108206701 | 108206967 |
| chr12 | 108206967 | 108207162 |

|       |           |           |
|-------|-----------|-----------|
| chr12 | 108208360 | 108208515 |
| chr12 | 108209060 | 108209347 |
| chr12 | 108217484 | 108217873 |
| chr12 | 108217873 | 108218043 |
| chr12 | 108221261 | 108221540 |
| chr12 | 108226087 | 108226258 |
| chr12 | 108234865 | 108235242 |
| chr12 | 108235242 | 108235532 |
| chr12 | 108239317 | 108240036 |
| chr12 | 108244716 | 108245247 |
| chr12 | 108245512 | 108245956 |
| chr12 | 108252251 | 108252721 |
| chr12 | 108253190 | 108253401 |
| chr12 | 108258910 | 108259134 |
| chr12 | 108269037 | 108269383 |
| chr12 | 108274918 | 108275674 |
| chr12 | 108275674 | 108275973 |
| chr12 | 108275973 | 108276315 |
| chr12 | 108276381 | 108276601 |
| chr12 | 108284717 | 108284919 |
| chr12 | 108285002 | 108285572 |
| chr12 | 108292451 | 108292797 |
| chr12 | 108292961 | 108293314 |
| chr12 | 108294592 | 108294988 |
| chr12 | 108297117 | 108297318 |
| chr12 | 108306432 | 108306648 |
| chr12 | 108308296 | 108308665 |
| chr12 | 108308665 | 108308953 |
| chr12 | 108309393 | 108309744 |
| chr12 | 108309789 | 108310042 |
| chr12 | 108310527 | 108310793 |
| chr12 | 108317479 | 108317635 |
| chr12 | 108321888 | 108322295 |
| chr12 | 108325457 | 108325667 |
| chr12 | 108327852 | 108328198 |
| chr12 | 108328324 | 108328508 |
| chr12 | 108333070 | 108333357 |
| chr12 | 108333581 | 108333983 |
| chr12 | 108333983 | 108334620 |
| chr12 | 108334624 | 108334839 |
| chr12 | 108338743 | 108338917 |
| chr12 | 108349743 | 108349963 |

|       |           |           |
|-------|-----------|-----------|
| chr12 | 108351614 | 108351841 |
| chr12 | 108352765 | 108353127 |
| chr12 | 108354399 | 108354711 |
| chr12 | 108362531 | 108362747 |
| chr12 | 108363805 | 108364306 |
| chr12 | 108365463 | 108365647 |
| chr12 | 108370415 | 108370882 |
| chr12 | 108370882 | 108371291 |
| chr12 | 108380273 | 108380462 |
| chr12 | 108383986 | 108384201 |
| chr12 | 108384201 | 108384486 |
| chr12 | 108392154 | 108392630 |
| chr12 | 108393148 | 108393440 |
| chr12 | 108393665 | 108394118 |
| chr12 | 108396070 | 108396492 |
| chr12 | 108401250 | 108401680 |
| chr12 | 108401680 | 108401965 |
| chr12 | 108403965 | 108404417 |
| chr12 | 108406752 | 108406979 |
| chr12 | 108422562 | 108422898 |
| chr12 | 108422898 | 108423675 |
| chr12 | 108442243 | 108442396 |
| chr12 | 108443381 | 108443593 |
| chr12 | 108444423 | 108444805 |
| chr12 | 108448448 | 108448647 |
| chr12 | 108453404 | 108453815 |
| chr12 | 108453815 | 108454134 |
| chr12 | 108469099 | 108469350 |
| chr12 | 108471332 | 108471490 |
| chr12 | 108473091 | 108473270 |
| chr12 | 108485630 | 108485801 |
| chr12 | 108485825 | 108486178 |
| chr12 | 108486178 | 108486528 |
| chr12 | 108487889 | 108488279 |
| chr12 | 108491072 | 108491295 |
| chr12 | 108494202 | 108494372 |
| chr12 | 108494372 | 108494706 |
| chr12 | 108495500 | 108495910 |
| chr12 | 108529282 | 108529545 |
| chr12 | 108536540 | 108536778 |
| chr12 | 108541125 | 108541360 |
| chr12 | 108546958 | 108547108 |

|       |           |           |
|-------|-----------|-----------|
| chr12 | 108554115 | 108554319 |
| chr12 | 108554337 | 108554822 |
| chr12 | 108554822 | 108555084 |
| chr12 | 108555084 | 108555281 |
| chr12 | 108555281 | 108555485 |
| chr12 | 108555485 | 108555689 |
| chr12 | 108583989 | 108584217 |
| chr12 | 108613160 | 108613441 |
| chr12 | 108652103 | 108652284 |
| chr12 | 108657460 | 108657683 |
| chr12 | 108671383 | 108671533 |
| chr12 | 108675500 | 108676066 |
| chr12 | 108676096 | 108676312 |
| chr12 | 108677223 | 108677493 |
| chr12 | 108678453 | 108678676 |
| chr12 | 108686982 | 108687250 |
| chr12 | 108689197 | 108689576 |
| chr12 | 108689576 | 108689897 |
| chr12 | 108690557 | 108690865 |
| chr12 | 108694822 | 108695078 |
| chr12 | 108700184 | 108700400 |
| chr12 | 108702171 | 108702613 |
| chr12 | 108704360 | 108704644 |
| chr12 | 108704644 | 108704945 |
| chr12 | 108706222 | 108706372 |
| chr12 | 108709478 | 108709695 |
| chr12 | 108710883 | 108711285 |
| chr12 | 108749645 | 108750016 |
| chr12 | 108750302 | 108750463 |
| chr12 | 108757547 | 108758420 |
| chr12 | 108760611 | 108760818 |
| chr12 | 108763603 | 108763846 |
| chr12 | 108765669 | 108766023 |
| chr12 | 108766023 | 108766241 |
| chr12 | 108766241 | 108766483 |
| chr12 | 108766656 | 108766813 |
| chr12 | 108787076 | 108787226 |
| chr12 | 108792197 | 108792449 |
| chr12 | 108792503 | 108792854 |
| chr12 | 108792854 | 108793444 |
| chr12 | 108794105 | 108794449 |
| chr12 | 108794449 | 108794770 |

|       |           |           |
|-------|-----------|-----------|
| chr12 | 108808542 | 108808692 |
| chr12 | 108811245 | 108811471 |
| chr12 | 108819433 | 108819671 |
| chr12 | 108820496 | 108820679 |
| chr12 | 108829109 | 108829327 |
| chr12 | 108829596 | 108829843 |
| chr12 | 108835369 | 108836094 |
| chr12 | 108836094 | 108836386 |
| chr12 | 108836386 | 108836613 |
| chr12 | 108841258 | 108841507 |
| chr12 | 108842800 | 108842969 |
| chr12 | 108844903 | 108845165 |
| chr12 | 108846483 | 108846841 |
| chr12 | 108848025 | 108848449 |
| chr12 | 108855931 | 108856165 |
| chr12 | 108856240 | 108856523 |
| chr12 | 108856523 | 108856736 |
| chr12 | 108859085 | 108859321 |
| chr12 | 108859321 | 108859554 |
| chr12 | 108859554 | 108859780 |
| chr12 | 108869693 | 108869928 |
| chr12 | 108880726 | 108881068 |
| chr12 | 108881349 | 108881544 |
| chr12 | 108885953 | 108886303 |
| chr12 | 108891195 | 108891371 |
| chr12 | 108893405 | 108893717 |
| chr12 | 108893784 | 108894074 |
| chr12 | 108894074 | 108894617 |
| chr12 | 108902971 | 108903332 |
| chr12 | 108903534 | 108903882 |
| chr12 | 108914348 | 108914537 |
| chr12 | 108931150 | 108931368 |
| chr12 | 108942625 | 108942801 |
| chr12 | 108949861 | 108950107 |
| chr12 | 108952821 | 108953065 |
| chr12 | 108959749 | 108959935 |
| chr12 | 108964936 | 108965213 |
| chr12 | 108965263 | 108965418 |
| chr12 | 108965445 | 108965711 |
| chr12 | 108965863 | 108966052 |
| chr12 | 108966121 | 108966531 |
| chr12 | 108966531 | 108966877 |

|       |           |           |
|-------|-----------|-----------|
| chr12 | 108968040 | 108968220 |
| chr12 | 108984488 | 108984895 |
| chr12 | 108984895 | 108985173 |
| chr12 | 108985173 | 108985409 |
| chr12 | 108994731 | 108995017 |
| chr12 | 109003055 | 109003281 |
| chr12 | 109042943 | 109043138 |
| chr12 | 109044388 | 109045182 |
| chr12 | 109067920 | 109068238 |
| chr12 | 109068308 | 109068459 |
| chr12 | 109375652 | 109375833 |
| chr12 | 109393853 | 109394140 |
| chr12 | 109402213 | 109402693 |
| chr12 | 109405876 | 109406033 |
| chr12 | 109417563 | 109418277 |
| chr12 | 109418317 | 109418616 |
| chr12 | 109423615 | 109423926 |
| chr12 | 109425125 | 109425351 |
| chr12 | 109436321 | 109436532 |
| chr12 | 109437785 | 109438062 |
| chr12 | 109441484 | 109441739 |
| chr12 | 109441916 | 109442149 |
| chr12 | 109444930 | 109445321 |
| chr12 | 109445587 | 109445738 |
| chr12 | 109446113 | 109446312 |
| chr12 | 109453186 | 109453362 |
| chr12 | 109542883 | 109543191 |
| chr12 | 109583302 | 109583498 |
| chr12 | 109617234 | 109617434 |
| chr12 | 109623305 | 109623525 |
| chr12 | 109626937 | 109627355 |
| chr12 | 109628974 | 109629216 |
| chr12 | 109634695 | 109634866 |
| chr12 | 109694116 | 109694516 |
| chr12 | 109694774 | 109695287 |
| chr12 | 109749698 | 109750285 |
| chr12 | 109764300 | 109764566 |
| chr12 | 109790393 | 109790779 |
| chr12 | 109798822 | 109799202 |
| chr12 | 109799202 | 109799475 |
| chr12 | 109799475 | 109799910 |
| chr12 | 109811080 | 109811292 |



|       |           |           |
|-------|-----------|-----------|
| chr12 | 109830374 | 109830565 |
| chr12 | 109845693 | 109845897 |
| chr12 | 109856490 | 109856884 |
| chr12 | 109856884 | 109857279 |
| chr12 | 109895576 | 109895833 |
| chr12 | 109917888 | 109918152 |
| chr12 | 109923132 | 109923871 |
| chr12 | 109958391 | 109958693 |
| chr12 | 109958693 | 109959077 |
| chr12 | 110009231 | 110009548 |
| chr12 | 110012615 | 110012811 |
| chr12 | 110012989 | 110013173 |
| chr12 | 110031399 | 110031629 |
| chr12 | 110033195 | 110033670 |
| chr12 | 110041304 | 110041741 |
| chr12 | 110041741 | 110042199 |
| chr12 | 110043041 | 110043293 |
| chr12 | 110043293 | 110043623 |
| chr12 | 110055764 | 110056030 |
| chr12 | 110062921 | 110063367 |
| chr12 | 110066490 | 110066832 |
| chr12 | 110071870 | 110072282 |
| chr12 | 110074500 | 110074911 |
| chr12 | 110074911 | 110075310 |
| chr12 | 110086662 | 110086874 |
| chr12 | 110087444 | 110087684 |
| chr12 | 110087846 | 110088137 |
| chr12 | 110088189 | 110088424 |
| chr12 | 110088424 | 110088668 |
| chr12 | 110109140 | 110109419 |
| chr12 | 110109421 | 110109674 |
| chr12 | 110112537 | 110112717 |
| chr12 | 110112717 | 110112997 |
| chr12 | 110120214 | 110120564 |
| chr12 | 110127025 | 110127453 |
| chr12 | 110145517 | 110145714 |
| chr12 | 110156457 | 110156759 |
| chr12 | 110169071 | 110169555 |
| chr12 | 110169555 | 110169978 |
| chr12 | 110200934 | 110201270 |
| chr12 | 110203415 | 110203638 |
| chr12 | 110203739 | 110203945 |

|       |           |           |
|-------|-----------|-----------|
| chr12 | 110203959 | 110204116 |
| chr12 | 110204286 | 110204661 |
| chr12 | 110206327 | 110206579 |
| chr12 | 110207581 | 110207912 |
| chr12 | 110214935 | 110215160 |
| chr12 | 110215403 | 110215747 |
| chr12 | 110278022 | 110278293 |
| chr12 | 110278782 | 110279194 |
| chr12 | 110373437 | 110373892 |
| chr12 | 110377838 | 110378070 |
| chr12 | 110381133 | 110381418 |
| chr12 | 110381418 | 110381689 |
| chr12 | 110382254 | 110382451 |
| chr12 | 110389432 | 110389792 |
| chr12 | 110389856 | 110390187 |
| chr12 | 110391793 | 110391944 |
| chr12 | 110398483 | 110398730 |
| chr12 | 110399166 | 110399653 |
| chr12 | 110417880 | 110418501 |
| chr12 | 110418761 | 110419106 |
| chr12 | 110419930 | 110420151 |
| chr12 | 110424064 | 110424312 |
| chr12 | 110424312 | 110424530 |
| chr12 | 110424530 | 110424718 |
| chr12 | 110429468 | 110429870 |
| chr12 | 110431817 | 110432201 |
| chr12 | 110433528 | 110433970 |
| chr12 | 110437404 | 110437580 |
| chr12 | 110438443 | 110438729 |
| chr12 | 110438762 | 110439043 |
| chr12 | 110446202 | 110446460 |
| chr12 | 110446460 | 110446788 |
| chr12 | 110446788 | 110447266 |
| chr12 | 110447407 | 110447686 |
| chr12 | 110454207 | 110454526 |
| chr12 | 110474657 | 110474948 |
| chr12 | 110480790 | 110481053 |
| chr12 | 110485161 | 110485327 |
| chr12 | 110485327 | 110485482 |
| chr12 | 110485555 | 110485985 |
| chr12 | 110485985 | 110486546 |
| chr12 | 110497164 | 110497356 |

|       |           |           |
|-------|-----------|-----------|
| chr12 | 110497465 | 110497731 |
| chr12 | 110497731 | 110497975 |
| chr12 | 110498168 | 110498359 |
| chr12 | 110498359 | 110498631 |
| chr12 | 110498631 | 110498914 |
| chr12 | 110498914 | 110499216 |
| chr12 | 110499216 | 110499530 |
| chr12 | 110503536 | 110503721 |
| chr12 | 110504691 | 110504841 |
| chr12 | 110506070 | 110506401 |
| chr12 | 110515236 | 110515397 |
| chr12 | 110523705 | 110523857 |
| chr12 | 110532771 | 110533046 |
| chr12 | 110533353 | 110533553 |
| chr12 | 110533918 | 110534070 |
| chr12 | 110535270 | 110535517 |
| chr12 | 110549522 | 110549814 |
| chr12 | 110551631 | 110551788 |
| chr12 | 110553430 | 110553692 |
| chr12 | 110555542 | 110555804 |
| chr12 | 110566531 | 110566728 |
| chr12 | 110576753 | 110576915 |
| chr12 | 110580146 | 110580306 |
| chr12 | 110590840 | 110591021 |
| chr12 | 110591021 | 110591226 |
| chr12 | 110591226 | 110591520 |
| chr12 | 110591520 | 110592070 |
| chr12 | 110598628 | 110598841 |
| chr12 | 110599879 | 110600105 |
| chr12 | 110601206 | 110601543 |
| chr12 | 110601543 | 110601944 |
| chr12 | 110601944 | 110602262 |
| chr12 | 110606791 | 110606999 |
| chr12 | 110608512 | 110608823 |
| chr12 | 110608823 | 110609270 |
| chr12 | 110652643 | 110652821 |
| chr12 | 110659408 | 110659594 |
| chr12 | 110667499 | 110667838 |
| chr12 | 110673798 | 110674045 |
| chr12 | 110674325 | 110674566 |
| chr12 | 110677503 | 110677701 |
| chr12 | 110681229 | 110681530 |

|       |           |           |
|-------|-----------|-----------|
| chr12 | 110682548 | 110682832 |
| chr12 | 110687811 | 110688136 |
| chr12 | 110688136 | 110688632 |
| chr12 | 110689235 | 110689386 |
| chr12 | 110695643 | 110696113 |
| chr12 | 110696113 | 110696478 |
| chr12 | 110696478 | 110696939 |
| chr12 | 110701444 | 110701779 |
| chr12 | 110702982 | 110703649 |
| chr12 | 110706814 | 110707029 |
| chr12 | 110711300 | 110711665 |
| chr12 | 110713799 | 110714020 |
| chr12 | 110725272 | 110725475 |
| chr12 | 110725481 | 110725920 |
| chr12 | 110736743 | 110737071 |
| chr12 | 110737074 | 110737236 |
| chr12 | 110737313 | 110737492 |
| chr12 | 110737492 | 110737686 |
| chr12 | 110737686 | 110737888 |
| chr12 | 110737888 | 110738118 |
| chr12 | 110738118 | 110738490 |
| chr12 | 110738490 | 110738849 |
| chr12 | 110770009 | 110770200 |
| chr12 | 110779805 | 110779964 |
| chr12 | 110780148 | 110780472 |
| chr12 | 110780490 | 110780797 |
| chr12 | 110790714 | 110790869 |
| chr12 | 110796808 | 110796979 |
| chr12 | 110797324 | 110797815 |
| chr12 | 110797815 | 110798261 |
| chr12 | 110798261 | 110798542 |
| chr12 | 110805850 | 110806051 |
| chr12 | 110806380 | 110806600 |
| chr12 | 110808936 | 110809192 |
| chr12 | 110814992 | 110815202 |
| chr12 | 110819182 | 110819430 |
| chr12 | 110819430 | 110819768 |
| chr12 | 110821625 | 110821801 |
| chr12 | 110823540 | 110823814 |
| chr12 | 110830475 | 110830688 |
| chr12 | 110833948 | 110834195 |
| chr12 | 110836092 | 110836337 |

|       |           |           |
|-------|-----------|-----------|
| chr12 | 110838386 | 110838589 |
| chr12 | 110840455 | 110840609 |
| chr12 | 110840669 | 110841138 |
| chr12 | 110843736 | 110844018 |
| chr12 | 110844031 | 110844194 |
| chr12 | 110844826 | 110845055 |
| chr12 | 110845099 | 110845631 |
| chr12 | 110850124 | 110850383 |
| chr12 | 110850383 | 110850766 |
| chr12 | 110850766 | 110851122 |
| chr12 | 110851374 | 110851524 |
| chr12 | 110866338 | 110866591 |
| chr12 | 110871294 | 110871456 |
| chr12 | 110882394 | 110882671 |
| chr12 | 110883649 | 110884003 |
| chr12 | 110888627 | 110889058 |
| chr12 | 110889058 | 110889380 |
| chr12 | 110889380 | 110889832 |
| chr12 | 110917166 | 110917316 |
| chr12 | 110918699 | 110918887 |
| chr12 | 110919381 | 110919564 |
| chr12 | 110920946 | 110921096 |
| chr12 | 110932938 | 110933101 |
| chr12 | 110936137 | 110936339 |
| chr12 | 110936339 | 110936647 |
| chr12 | 110946355 | 110946679 |
| chr12 | 110953077 | 110953329 |
| chr12 | 110953441 | 110953813 |
| chr12 | 110954408 | 110954625 |
| chr12 | 110954625 | 110954882 |
| chr12 | 110967046 | 110967500 |
| chr12 | 110973207 | 110973507 |
| chr12 | 110978386 | 110978902 |
| chr12 | 110978902 | 110979561 |
| chr12 | 110986597 | 110986824 |
| chr12 | 110987797 | 110988146 |
| chr12 | 110991334 | 110991936 |
| chr12 | 110991936 | 110992310 |
| chr12 | 110992310 | 110992613 |
| chr12 | 111004176 | 111004562 |
| chr12 | 111005981 | 111006252 |
| chr12 | 111006290 | 111006517 |

|       |           |           |
|-------|-----------|-----------|
| chr12 | 111007763 | 111008070 |
| chr12 | 111008701 | 111008869 |
| chr12 | 111016825 | 111017125 |
| chr12 | 111038319 | 111038482 |
| chr12 | 111038523 | 111038684 |
| chr12 | 111038698 | 111039649 |
| chr12 | 111039844 | 111039994 |
| chr12 | 111041364 | 111041517 |
| chr12 | 111046975 | 111047164 |
| chr12 | 111060201 | 111060391 |
| chr12 | 111064577 | 111064955 |
| chr12 | 111066652 | 111066883 |
| chr12 | 111069331 | 111069680 |
| chr12 | 111087900 | 111088120 |
| chr12 | 111088120 | 111088333 |
| chr12 | 111088333 | 111088597 |
| chr12 | 111089224 | 111089386 |
| chr12 | 111094250 | 111094463 |
| chr12 | 111094931 | 111095168 |
| chr12 | 111096118 | 111096554 |
| chr12 | 111096554 | 111096850 |
| chr12 | 111097128 | 111097382 |
| chr12 | 111104917 | 111105067 |
| chr12 | 111113542 | 111114008 |
| chr12 | 111122406 | 111122846 |
| chr12 | 111135624 | 111135869 |
| chr12 | 111137204 | 111137426 |
| chr12 | 111150287 | 111150494 |
| chr12 | 111153200 | 111153374 |
| chr12 | 111164256 | 111164542 |
| chr12 | 111164542 | 111164819 |
| chr12 | 111165161 | 111165466 |
| chr12 | 111165750 | 111166007 |
| chr12 | 111166007 | 111166297 |
| chr12 | 111166297 | 111166717 |
| chr12 | 111166717 | 111167130 |
| chr12 | 111186672 | 111186859 |
| chr12 | 111186871 | 111187477 |
| chr12 | 111207028 | 111207190 |
| chr12 | 111210735 | 111210966 |
| chr12 | 111211346 | 111211669 |
| chr12 | 111211793 | 111212092 |

|       |           |           |
|-------|-----------|-----------|
| chr12 | 111218625 | 111218796 |
| chr12 | 111234419 | 111234669 |
| chr12 | 111247219 | 111247383 |
| chr12 | 111249223 | 111249384 |
| chr12 | 111258107 | 111258287 |
| chr12 | 111264578 | 111264757 |
| chr12 | 111266336 | 111266536 |
| chr12 | 111269791 | 111269951 |
| chr12 | 111272499 | 111272767 |
| chr12 | 111273305 | 111273455 |
| chr12 | 111275217 | 111275520 |
| chr12 | 111275520 | 111275813 |
| chr12 | 111283638 | 111283797 |
| chr12 | 111283892 | 111284042 |
| chr12 | 111285330 | 111285480 |
| chr12 | 111288025 | 111288194 |
| chr12 | 111288194 | 111288379 |
| chr12 | 111288806 | 111289078 |
| chr12 | 111293108 | 111293269 |
| chr12 | 111294226 | 111294465 |
| chr12 | 111303046 | 111303341 |
| chr12 | 111303341 | 111303553 |
| chr12 | 111303647 | 111304089 |
| chr12 | 111304089 | 111304503 |
| chr12 | 111309968 | 111310182 |
| chr12 | 111310182 | 111310553 |
| chr12 | 111310568 | 111310765 |
| chr12 | 111310765 | 111310984 |
| chr12 | 111316982 | 111317172 |
| chr12 | 111323387 | 111323804 |
| chr12 | 111328192 | 111328533 |
| chr12 | 111328533 | 111328774 |
| chr12 | 111334286 | 111334492 |
| chr12 | 111340540 | 111341177 |
| chr12 | 111341243 | 111341394 |
| chr12 | 111353114 | 111353410 |
| chr12 | 111353410 | 111354118 |
| chr12 | 111355468 | 111355618 |
| chr12 | 111361571 | 111361748 |
| chr12 | 111364356 | 111364584 |
| chr12 | 111366083 | 111366270 |
| chr12 | 111367006 | 111367158 |

|       |           |           |
|-------|-----------|-----------|
| chr12 | 111370236 | 111370771 |
| chr12 | 111376841 | 111377073 |
| chr12 | 111377073 | 111377385 |
| chr12 | 111377385 | 111377867 |
| chr12 | 111377867 | 111378269 |
| chr12 | 111378269 | 111378513 |
| chr12 | 111385872 | 111386412 |
| chr12 | 111386412 | 111386871 |
| chr12 | 111386871 | 111387196 |
| chr12 | 111387223 | 111387513 |
| chr12 | 111394778 | 111394933 |
| chr12 | 111398864 | 111399383 |
| chr12 | 111401453 | 111401823 |
| chr12 | 111411645 | 111412028 |
| chr12 | 111412031 | 111412288 |
| chr12 | 111413179 | 111413365 |
| chr12 | 111413365 | 111413701 |
| chr12 | 111425307 | 111425567 |
| chr12 | 111426134 | 111426402 |
| chr12 | 111427414 | 111427564 |
| chr12 | 111429622 | 111429977 |
| chr12 | 111430137 | 111430394 |
| chr12 | 111430394 | 111430713 |
| chr12 | 111430713 | 111431086 |
| chr12 | 111432079 | 111432571 |
| chr12 | 111434243 | 111434475 |
| chr12 | 111442250 | 111442896 |
| chr12 | 111443366 | 111443852 |
| chr12 | 111446470 | 111446651 |
| chr12 | 111446658 | 111446988 |
| chr12 | 111446988 | 111447264 |
| chr12 | 111447916 | 111448249 |
| chr12 | 111448434 | 111448586 |
| chr12 | 111448913 | 111449322 |
| chr12 | 111449322 | 111449772 |
| chr12 | 111455205 | 111455631 |
| chr12 | 111455631 | 111455862 |
| chr12 | 111455862 | 111456045 |
| chr12 | 111456045 | 111456363 |
| chr12 | 111461419 | 111461841 |
| chr12 | 111469579 | 111469852 |
| chr12 | 111471036 | 111471534 |



|       |           |           |
|-------|-----------|-----------|
| chr12 | 111474823 | 111475181 |
| chr12 | 111479968 | 111480177 |
| chr12 | 111481434 | 111481666 |
| chr12 | 111485311 | 111485625 |
| chr12 | 111485625 | 111485902 |
| chr12 | 111485902 | 111486112 |
| chr12 | 111504958 | 111505280 |
| chr12 | 111508503 | 111508754 |
| chr12 | 111516891 | 111517102 |
| chr12 | 111531097 | 111531399 |
| chr12 | 111531520 | 111531887 |
| chr12 | 111535436 | 111535655 |
| chr12 | 111535815 | 111536209 |
| chr12 | 111537426 | 111537593 |
| chr12 | 111537703 | 111538472 |
| chr12 | 111538531 | 111538889 |
| chr12 | 111547436 | 111547621 |
| chr12 | 111547621 | 111547712 |
| chr12 | 111547862 | 111548058 |
| chr12 | 111548203 | 111548400 |
| chr12 | 111548400 | 111548588 |
| chr12 | 111548598 | 111548952 |
| chr12 | 111549009 | 111549224 |
| chr12 | 111550806 | 111550992 |
| chr12 | 111553077 | 111553387 |
| chr12 | 111553387 | 111553657 |
| chr12 | 111553657 | 111553907 |
| chr12 | 111554139 | 111554308 |
| chr12 | 111559671 | 111559939 |
| chr12 | 111560072 | 111560264 |
| chr12 | 111565123 | 111565375 |
| chr12 | 111565375 | 111565669 |
| chr12 | 111568674 | 111569284 |
| chr12 | 111573486 | 111573664 |
| chr12 | 111574033 | 111574264 |
| chr12 | 111574264 | 111574563 |
| chr12 | 111574563 | 111574818 |
| chr12 | 111574818 | 111575003 |
| chr12 | 111575119 | 111575352 |
| chr12 | 111580189 | 111580400 |
| chr12 | 111599608 | 111599953 |
| chr12 | 111643852 | 111644058 |

|       |           |           |
|-------|-----------|-----------|
| chr12 | 111648169 | 111648370 |
| chr12 | 111648370 | 111648643 |
| chr12 | 111653493 | 111653774 |
| chr12 | 111661962 | 111662211 |
| chr12 | 111665106 | 111665402 |
| chr12 | 111665856 | 111666010 |
| chr12 | 111668409 | 111668663 |
| chr12 | 111670370 | 111671149 |
| chr12 | 111671172 | 111671408 |
| chr12 | 111671452 | 111671721 |
| chr12 | 111671726 | 111671946 |
| chr12 | 111672127 | 111672493 |
| chr12 | 111677444 | 111677599 |
| chr12 | 111677602 | 111677880 |
| chr12 | 111677880 | 111678201 |
| chr12 | 111678201 | 111678422 |
| chr12 | 111678422 | 111678624 |
| chr12 | 111678624 | 111678940 |
| chr12 | 111678940 | 111679286 |
| chr12 | 111685448 | 111685614 |
| chr12 | 111686193 | 111686348 |
| chr12 | 111686419 | 111686806 |
| chr12 | 111686808 | 111687004 |
| chr12 | 111689584 | 111689805 |
| chr12 | 111691204 | 111691610 |
| chr12 | 111691610 | 111691934 |
| chr12 | 111696394 | 111696644 |
| chr12 | 111697431 | 111697739 |
| chr12 | 111697739 | 111698044 |
| chr12 | 111698044 | 111698268 |
| chr12 | 111698297 | 111698674 |
| chr12 | 111704398 | 111704548 |
| chr12 | 111704584 | 111705042 |
| chr12 | 111705042 | 111705683 |
| chr12 | 111712516 | 111712878 |
| chr12 | 111712878 | 111713304 |
| chr12 | 111713304 | 111713592 |
| chr12 | 111713592 | 111713787 |
| chr12 | 111722759 | 111722925 |
| chr12 | 111726392 | 111726609 |
| chr12 | 111731412 | 111731603 |
| chr12 | 111731813 | 111732101 |

|       |           |           |
|-------|-----------|-----------|
| chr12 | 111732499 | 111732868 |
| chr12 | 111732875 | 111733027 |
| chr12 | 111736751 | 111736962 |
| chr12 | 111738802 | 111739106 |
| chr12 | 111741508 | 111741658 |
| chr12 | 111745352 | 111745643 |
| chr12 | 111745743 | 111745908 |
| chr12 | 111747624 | 111747923 |
| chr12 | 111749753 | 111750039 |
| chr12 | 111752531 | 111752898 |
| chr12 | 111753096 | 111753341 |
| chr12 | 111753366 | 111753701 |
| chr12 | 111756837 | 111757057 |
| chr12 | 111758352 | 111758730 |
| chr12 | 111758730 | 111759179 |
| chr12 | 111759218 | 111759415 |
| chr12 | 111759674 | 111760120 |
| chr12 | 111760311 | 111760504 |
| chr12 | 111760534 | 111760816 |
| chr12 | 111762785 | 111762935 |
| chr12 | 111768077 | 111768273 |
| chr12 | 111770967 | 111771154 |
| chr12 | 111779628 | 111779849 |
| chr12 | 111785248 | 111785546 |
| chr12 | 111791075 | 111791295 |
| chr12 | 111803531 | 111803783 |
| chr12 | 111809832 | 111810145 |
| chr12 | 111813092 | 111813255 |
| chr12 | 111813409 | 111813615 |
| chr12 | 111813743 | 111814269 |
| chr12 | 111814269 | 111814654 |
| chr12 | 111822388 | 111822551 |
| chr12 | 111846123 | 111846326 |
| chr12 | 111848287 | 111848541 |
| chr12 | 111849001 | 111849303 |
| chr12 | 111851340 | 111851495 |
| chr12 | 111853660 | 111853993 |
| chr12 | 111863878 | 111864182 |
| chr12 | 111864182 | 111864505 |
| chr12 | 111864505 | 111864774 |
| chr12 | 111878318 | 111878612 |
| chr12 | 111881747 | 111882037 |

|       |           |           |
|-------|-----------|-----------|
| chr12 | 111888201 | 111888496 |
| chr12 | 111891793 | 111891970 |
| chr12 | 111892085 | 111892270 |
| chr12 | 111895904 | 111896156 |
| chr12 | 111896836 | 111897055 |
| chr12 | 111897055 | 111897266 |
| chr12 | 111901515 | 111901742 |
| chr12 | 111907562 | 111907922 |
| chr12 | 111907922 | 111908342 |
| chr12 | 111908342 | 111908701 |
| chr12 | 111926010 | 111926263 |
| chr12 | 111936621 | 111937187 |
| chr12 | 111937187 | 111937607 |
| chr12 | 111937607 | 111937906 |
| chr12 | 111938764 | 111939110 |
| chr12 | 111943827 | 111943977 |
| chr12 | 111944021 | 111944442 |
| chr12 | 111944442 | 111944833 |
| chr12 | 111945760 | 111946170 |
| chr12 | 111946170 | 111946518 |
| chr12 | 111946765 | 111947054 |
| chr12 | 111958050 | 111958480 |
| chr12 | 111958502 | 111958657 |
| chr12 | 111958700 | 111958855 |
| chr12 | 111959048 | 111959387 |
| chr12 | 111966321 | 111966578 |
| chr12 | 111966578 | 111966910 |
| chr12 | 111966910 | 111967238 |
| chr12 | 111982607 | 111982882 |
| chr12 | 111992030 | 111992307 |
| chr12 | 111992609 | 111992991 |
| chr12 | 111992991 | 111993262 |
| chr12 | 112001204 | 112001640 |
| chr12 | 112018522 | 112018984 |
| chr12 | 112035531 | 112035810 |
| chr12 | 112077656 | 112077967 |
| chr12 | 112085724 | 112086004 |
| chr12 | 112086004 | 112086361 |
| chr12 | 112091152 | 112091445 |
| chr12 | 112103284 | 112103491 |
| chr12 | 112106570 | 112106981 |
| chr12 | 112112726 | 112113033 |

|       |           |           |
|-------|-----------|-----------|
| chr12 | 112113033 | 112113364 |
| chr12 | 112113773 | 112114147 |
| chr12 | 112115581 | 112115758 |
| chr12 | 112117721 | 112117975 |
| chr12 | 112125839 | 112126426 |
| chr12 | 112129576 | 112129858 |
| chr12 | 112130090 | 112130375 |
| chr12 | 112130449 | 112130878 |
| chr12 | 112140164 | 112140566 |
| chr12 | 112141378 | 112141588 |
| chr12 | 112145235 | 112145503 |
| chr12 | 112145538 | 112145778 |
| chr12 | 112146104 | 112146347 |
| chr12 | 112146347 | 112146633 |
| chr12 | 112150262 | 112150468 |
| chr12 | 112151546 | 112151837 |
| chr12 | 112152830 | 112152992 |
| chr12 | 112164160 | 112164353 |
| chr12 | 112169338 | 112169511 |
| chr12 | 112172299 | 112172654 |
| chr12 | 112183726 | 112183971 |
| chr12 | 112186859 | 112187169 |
| chr12 | 112191929 | 112192080 |
| chr12 | 112226618 | 112226797 |
| chr12 | 112255330 | 112255567 |
| chr12 | 112265330 | 112265578 |
| chr12 | 112267839 | 112268019 |
| chr12 | 112268019 | 112268123 |
| chr12 | 112268397 | 112268799 |
| chr12 | 112295152 | 112295536 |
| chr12 | 112295536 | 112295932 |
| chr12 | 112297144 | 112297402 |
| chr12 | 112297402 | 112297688 |
| chr12 | 112297688 | 112298009 |
| chr12 | 112309808 | 112310037 |
| chr12 | 112329273 | 112329454 |
| chr12 | 112339860 | 112340164 |
| chr12 | 112407760 | 112407898 |
| chr12 | 112407898 | 112408048 |
| chr12 | 112421585 | 112421781 |
| chr12 | 112423074 | 112423359 |
| chr12 | 112426654 | 112427007 |

|       |           |           |
|-------|-----------|-----------|
| chr12 | 112427007 | 112427225 |
| chr12 | 112431730 | 112432204 |
| chr12 | 112432828 | 112433066 |
| chr12 | 112437384 | 112437539 |
| chr12 | 112450980 | 112451261 |
| chr12 | 112458008 | 112458168 |
| chr12 | 112463943 | 112464293 |
| chr12 | 112473800 | 112474119 |
| chr12 | 112481637 | 112481903 |
| chr12 | 112481903 | 112482301 |
| chr12 | 112489973 | 112490384 |
| chr12 | 112490384 | 112491093 |
| chr12 | 112491144 | 112491348 |
| chr12 | 112491348 | 112491667 |
| chr12 | 112497763 | 112498112 |
| chr12 | 112498662 | 112499025 |
| chr12 | 112507778 | 112508191 |
| chr12 | 112508191 | 112508602 |
| chr12 | 112511157 | 112511360 |
| chr12 | 112516645 | 112517511 |
| chr12 | 112534988 | 112535407 |
| chr12 | 112537360 | 112537683 |
| chr12 | 112538414 | 112538705 |
| chr12 | 112542822 | 112543267 |
| chr12 | 112551997 | 112552382 |
| chr12 | 112552382 | 112552706 |
| chr12 | 112552706 | 112553159 |
| chr12 | 112555010 | 112555281 |
| chr12 | 112560135 | 112560691 |
| chr12 | 112562527 | 112562713 |
| chr12 | 112568375 | 112568864 |
| chr12 | 112570037 | 112570306 |
| chr12 | 112571152 | 112571396 |
| chr12 | 112576463 | 112576689 |
| chr12 | 112576776 | 112577096 |
| chr12 | 112578345 | 112578686 |
| chr12 | 112578686 | 112579138 |
| chr12 | 112579635 | 112579866 |
| chr12 | 112580055 | 112580290 |
| chr12 | 112587294 | 112588045 |
| chr12 | 112588337 | 112588701 |
| chr12 | 112588701 | 112588933 |

|       |           |           |
|-------|-----------|-----------|
| chr12 | 112588933 | 112589302 |
| chr12 | 112594365 | 112594586 |
| chr12 | 112595262 | 112595534 |
| chr12 | 112595563 | 112596056 |
| chr12 | 112599158 | 112599537 |
| chr12 | 112604798 | 112605078 |
| chr12 | 112605078 | 112605383 |
| chr12 | 112605383 | 112605722 |
| chr12 | 112605722 | 112606077 |
| chr12 | 112607048 | 112607384 |
| chr12 | 112616661 | 112616863 |
| chr12 | 112617230 | 112617604 |
| chr12 | 112618035 | 112618249 |
| chr12 | 112619758 | 112620110 |
| chr12 | 112620110 | 112620413 |
| chr12 | 112620793 | 112620943 |
| chr12 | 112621931 | 112622212 |
| chr12 | 112622331 | 112622491 |
| chr12 | 112627535 | 112627893 |
| chr12 | 112628279 | 112628567 |
| chr12 | 112628903 | 112629348 |
| chr12 | 112629348 | 112629824 |
| chr12 | 112635398 | 112635563 |
| chr12 | 112643169 | 112643365 |
| chr12 | 112644312 | 112644944 |
| chr12 | 112644944 | 112645225 |
| chr12 | 112645225 | 112645457 |
| chr12 | 112648185 | 112648432 |
| chr12 | 112651906 | 112652142 |
| chr12 | 112653172 | 112653475 |
| chr12 | 112653475 | 112653716 |
| chr12 | 112659203 | 112659424 |
| chr12 | 112660669 | 112660959 |
| chr12 | 112671999 | 112672178 |
| chr12 | 112672906 | 112673154 |
| chr12 | 112673211 | 112673414 |
| chr12 | 112673849 | 112674002 |
| chr12 | 112674220 | 112674576 |
| chr12 | 112674576 | 112674979 |
| chr12 | 112675079 | 112675349 |
| chr12 | 112675349 | 112675707 |
| chr12 | 112678495 | 112678978 |

|       |           |           |
|-------|-----------|-----------|
| chr12 | 112678978 | 112679587 |
| chr12 | 112681002 | 112681152 |
| chr12 | 112693264 | 112693955 |
| chr12 | 112694413 | 112694620 |
| chr12 | 112694620 | 112694876 |
| chr12 | 112701732 | 112701923 |
| chr12 | 112702258 | 112702720 |
| chr12 | 112702720 | 112702962 |
| chr12 | 112706851 | 112707074 |
| chr12 | 112707074 | 112707358 |
| chr12 | 112707628 | 112707800 |
| chr12 | 112713396 | 112713559 |
| chr12 | 112713828 | 112713996 |
| chr12 | 112714375 | 112714538 |
| chr12 | 112717212 | 112717372 |
| chr12 | 112721273 | 112721828 |
| chr12 | 112721828 | 112722367 |
| chr12 | 112722367 | 112722793 |
| chr12 | 112722793 | 112723053 |
| chr12 | 112723053 | 112723330 |
| chr12 | 112724029 | 112724254 |
| chr12 | 112724296 | 112724470 |
| chr12 | 112727880 | 112728165 |
| chr12 | 112728325 | 112728669 |
| chr12 | 112728685 | 112728914 |
| chr12 | 112742785 | 112742968 |
| chr12 | 112743015 | 112743165 |
| chr12 | 112743206 | 112743492 |
| chr12 | 112743509 | 112743667 |
| chr12 | 112745902 | 112746068 |
| chr12 | 112746687 | 112746984 |
| chr12 | 112747614 | 112747848 |
| chr12 | 112751114 | 112751453 |
| chr12 | 112752424 | 112752761 |
| chr12 | 112758022 | 112758184 |
| chr12 | 112759683 | 112759908 |
| chr12 | 112764016 | 112764210 |
| chr12 | 112764210 | 112764539 |
| chr12 | 112771418 | 112771689 |
| chr12 | 112774015 | 112774224 |
| chr12 | 112779081 | 112779233 |
| chr12 | 112780414 | 112780612 |



|       |           |           |
|-------|-----------|-----------|
| chr12 | 112780775 | 112781045 |
| chr12 | 112781969 | 112782119 |
| chr12 | 112782726 | 112782907 |
| chr12 | 112795689 | 112796126 |
| chr12 | 112796933 | 112797235 |
| chr12 | 112797235 | 112797514 |
| chr12 | 112797514 | 112797760 |
| chr12 | 112797760 | 112798010 |
| chr12 | 112798010 | 112798472 |
| chr12 | 112802608 | 112802800 |
| chr12 | 112804076 | 112804391 |
| chr12 | 112806055 | 112806458 |
| chr12 | 112808699 | 112809042 |
| chr12 | 112809042 | 112809456 |
| chr12 | 112816305 | 112816570 |
| chr12 | 112816982 | 112817144 |
| chr12 | 112817512 | 112817692 |
| chr12 | 112822794 | 112823000 |
| chr12 | 112823582 | 112823756 |
| chr12 | 112828960 | 112829290 |
| chr12 | 112829290 | 112829584 |
| chr12 | 112829584 | 112830011 |
| chr12 | 112835095 | 112835402 |
| chr12 | 112836019 | 112836233 |
| chr12 | 112843691 | 112843841 |
| chr12 | 112843862 | 112844145 |
| chr12 | 112849213 | 112849446 |
| chr12 | 112849477 | 112849640 |
| chr12 | 112850513 | 112850769 |
| chr12 | 112850993 | 112851577 |
| chr12 | 112851652 | 112851883 |
| chr12 | 112851883 | 112852181 |
| chr12 | 112853243 | 112853436 |
| chr12 | 112856351 | 112856626 |
| chr12 | 112864850 | 112865254 |
| chr12 | 112866522 | 112867191 |
| chr12 | 112868612 | 112868950 |
| chr12 | 112873600 | 112873851 |
| chr12 | 112875241 | 112875604 |
| chr12 | 112875604 | 112876069 |
| chr12 | 112876277 | 112876734 |
| chr12 | 112880851 | 112881029 |

|       |           |           |
|-------|-----------|-----------|
| chr12 | 112881194 | 112881412 |
| chr12 | 112890660 | 112890821 |
| chr12 | 112897530 | 112897819 |
| chr12 | 112897819 | 112898337 |
| chr12 | 112905527 | 112905684 |
| chr12 | 112908164 | 112908414 |
| chr12 | 112913799 | 112913967 |
| chr12 | 112914062 | 112914219 |
| chr12 | 112922641 | 112922889 |
| chr12 | 112928416 | 112928664 |
| chr12 | 112928664 | 112928920 |
| chr12 | 112928920 | 112929261 |
| chr12 | 112929342 | 112929642 |
| chr12 | 112929642 | 112929962 |
| chr12 | 112929962 | 112930202 |
| chr12 | 112930202 | 112930403 |
| chr12 | 112937872 | 112938398 |
| chr12 | 112938943 | 112939209 |
| chr12 | 112941762 | 112942034 |
| chr12 | 112942034 | 112942336 |
| chr12 | 112947383 | 112947799 |
| chr12 | 112950198 | 112950759 |
| chr12 | 112952049 | 112952281 |
| chr12 | 112952434 | 112952897 |
| chr12 | 112955873 | 112956165 |
| chr12 | 112958315 | 112958791 |
| chr12 | 112966922 | 112967082 |
| chr12 | 112976314 | 112976737 |
| chr12 | 112976737 | 112977255 |
| chr12 | 112980870 | 112981112 |
| chr12 | 112985430 | 112985657 |
| chr12 | 112990982 | 112991199 |
| chr12 | 112994289 | 112994524 |
| chr12 | 113000063 | 113000314 |
| chr12 | 113000314 | 113000642 |
| chr12 | 113000642 | 113000936 |
| chr12 | 113000936 | 113001374 |
| chr12 | 113005043 | 113005303 |
| chr12 | 113012029 | 113012299 |
| chr12 | 113013773 | 113014112 |
| chr12 | 113014112 | 113014588 |
| chr12 | 113014588 | 113015087 |

|       |           |           |
|-------|-----------|-----------|
| chr12 | 113023065 | 113023473 |
| chr12 | 113030190 | 113030426 |
| chr12 | 113032665 | 113032826 |
| chr12 | 113038501 | 113038745 |
| chr12 | 113039760 | 113040278 |
| chr12 | 113045378 | 113045636 |
| chr12 | 113047621 | 113047920 |
| chr12 | 113049833 | 113050076 |
| chr12 | 113051726 | 113051851 |
| chr12 | 113051851 | 113051982 |
| chr12 | 113052150 | 113052301 |
| chr12 | 113058963 | 113059303 |
| chr12 | 113059330 | 113059621 |
| chr12 | 113061679 | 113061854 |
| chr12 | 113073734 | 113073993 |
| chr12 | 113074330 | 113074672 |
| chr12 | 113074672 | 113074960 |
| chr12 | 113074960 | 113075165 |
| chr12 | 113075165 | 113075486 |
| chr12 | 113097740 | 113098026 |
| chr12 | 113098026 | 113098388 |
| chr12 | 113098530 | 113098880 |
| chr12 | 113098880 | 113099345 |
| chr12 | 113099498 | 113099780 |
| chr12 | 113102531 | 113102782 |
| chr12 | 113103987 | 113104214 |
| chr12 | 113106288 | 113106709 |
| chr12 | 113106709 | 113107010 |
| chr12 | 113113923 | 113114073 |
| chr12 | 113119121 | 113119305 |
| chr12 | 113119342 | 113119542 |
| chr12 | 113119542 | 113119824 |
| chr12 | 113119830 | 113120036 |
| chr12 | 113132387 | 113132932 |
| chr12 | 113139191 | 113139508 |
| chr12 | 113139901 | 113140296 |
| chr12 | 113140296 | 113140712 |
| chr12 | 113140712 | 113141158 |
| chr12 | 113144500 | 113144723 |
| chr12 | 113146220 | 113146414 |
| chr12 | 113146619 | 113147137 |
| chr12 | 113147269 | 113147530 |

|       |           |           |
|-------|-----------|-----------|
| chr12 | 113148455 | 113148750 |
| chr12 | 113149322 | 113149723 |
| chr12 | 113155142 | 113155433 |
| chr12 | 113155491 | 113155685 |
| chr12 | 113155685 | 113156052 |
| chr12 | 113156052 | 113156527 |
| chr12 | 113156527 | 113156906 |
| chr12 | 113168062 | 113168304 |
| chr12 | 113177263 | 113177669 |
| chr12 | 113177669 | 113177952 |
| chr12 | 113180893 | 113181337 |
| chr12 | 113185637 | 113185824 |
| chr12 | 113185824 | 113186022 |
| chr12 | 113187512 | 113187982 |
| chr12 | 113187982 | 113188304 |
| chr12 | 113193340 | 113193550 |
| chr12 | 113193550 | 113193776 |
| chr12 | 113207838 | 113208019 |
| chr12 | 113210630 | 113210942 |
| chr12 | 113215950 | 113216284 |
| chr12 | 113217354 | 113217606 |
| chr12 | 113217951 | 113218228 |
| chr12 | 113219927 | 113220175 |
| chr12 | 113220558 | 113220824 |
| chr12 | 113221371 | 113221577 |
| chr12 | 113222073 | 113222346 |
| chr12 | 113222346 | 113222659 |
| chr12 | 113222825 | 113223079 |
| chr12 | 113227723 | 113227877 |
| chr12 | 113230821 | 113231081 |
| chr12 | 113238031 | 113238181 |
| chr12 | 113240032 | 113240185 |
| chr12 | 113261907 | 113262176 |
| chr12 | 113262380 | 113263061 |
| chr12 | 113263061 | 113263456 |
| chr12 | 113264423 | 113264647 |
| chr12 | 113274916 | 113275071 |
| chr12 | 113275285 | 113275659 |
| chr12 | 113275668 | 113275843 |
| chr12 | 113276075 | 113276226 |
| chr12 | 113276254 | 113276569 |
| chr12 | 113276569 | 113277046 |

|       |           |           |
|-------|-----------|-----------|
| chr12 | 113293171 | 113293358 |
| chr12 | 113293358 | 113293643 |
| chr12 | 113293643 | 113294027 |
| chr12 | 113294027 | 113294300 |
| chr12 | 113294300 | 113294538 |
| chr12 | 113294538 | 113294820 |
| chr12 | 113294820 | 113295047 |
| chr12 | 113295186 | 113295417 |
| chr12 | 113305725 | 113306030 |
| chr12 | 113306030 | 113306334 |
| chr12 | 113311202 | 113311357 |
| chr12 | 113327935 | 113328133 |
| chr12 | 113335017 | 113335343 |
| chr12 | 113335579 | 113335797 |
| chr12 | 113335940 | 113336187 |
| chr12 | 113336264 | 113336477 |
| chr12 | 113337613 | 113337815 |
| chr12 | 113424238 | 113424672 |
| chr12 | 113424672 | 113425033 |
| chr12 | 113425033 | 113425458 |
| chr12 | 113487775 | 113488033 |
| chr12 | 114048094 | 114048254 |
| chr12 | 114087651 | 114087893 |
| chr12 | 114207368 | 114207554 |
| chr12 | 114378675 | 114379026 |
| chr12 | 114379052 | 114379313 |
| chr12 | 114935816 | 114936029 |
| chr12 | 114990932 | 114991236 |
| chr12 | 114991236 | 114991455 |
| chr12 | 115034499 | 115034757 |
| chr12 | 115034757 | 115034968 |
| chr12 | 115044739 | 115045198 |
| chr12 | 115045211 | 115045612 |
| chr12 | 115088784 | 115089142 |
| chr12 | 115089197 | 115089545 |
| chr12 | 115089545 | 115089766 |
| chr12 | 115105562 | 115105731 |
| chr12 | 115109734 | 115110087 |
| chr12 | 115110490 | 115110718 |
| chr12 | 115119024 | 115119272 |
| chr12 | 115119686 | 115119851 |
| chr12 | 115311975 | 115312493 |

|       |           |           |
|-------|-----------|-----------|
| chr12 | 115320733 | 115320939 |
| chr12 | 115924117 | 115924280 |
| chr12 | 115967644 | 115967809 |
| chr12 | 116047394 | 116047808 |
| chr12 | 116047808 | 116048297 |
| chr12 | 116071024 | 116071479 |
| chr12 | 116077246 | 116077431 |
| chr12 | 116077431 | 116077655 |
| chr12 | 116077655 | 116077975 |
| chr12 | 116077975 | 116078284 |
| chr12 | 116095578 | 116095752 |
| chr12 | 116096563 | 116096830 |
| chr12 | 116132997 | 116133193 |
| chr12 | 116138902 | 116139134 |
| chr12 | 116146447 | 116146603 |
| chr12 | 116152947 | 116153098 |
| chr12 | 116159334 | 116159542 |
| chr12 | 116165155 | 116165403 |
| chr12 | 116165483 | 116165643 |
| chr12 | 116167338 | 116167497 |
| chr12 | 116168210 | 116168400 |
| chr12 | 116169703 | 116170074 |
| chr12 | 116172414 | 116172567 |
| chr12 | 116181353 | 116181729 |
| chr12 | 116181729 | 116182053 |
| chr12 | 116183414 | 116183722 |
| chr12 | 116187640 | 116187790 |
| chr12 | 116196710 | 116196867 |
| chr12 | 116202241 | 116202416 |
| chr12 | 116202416 | 116202596 |
| chr12 | 116202675 | 116202938 |
| chr12 | 116203184 | 116203345 |
| chr12 | 116203793 | 116203943 |
| chr12 | 116205713 | 116206148 |
| chr12 | 116213870 | 116214023 |
| chr12 | 116224549 | 116224826 |
| chr12 | 116231579 | 116231802 |
| chr12 | 116231802 | 116231989 |
| chr12 | 116235376 | 116235660 |
| chr12 | 116244616 | 116244934 |
| chr12 | 116250201 | 116250371 |
| chr12 | 116254719 | 116255035 |

|       |           |           |
|-------|-----------|-----------|
| chr12 | 116258258 | 116258687 |
| chr12 | 116262540 | 116262884 |
| chr12 | 116262884 | 116263132 |
| chr12 | 116263132 | 116263356 |
| chr12 | 116269093 | 116269529 |
| chr12 | 116269529 | 116270069 |
| chr12 | 116280591 | 116281063 |
| chr12 | 116281063 | 116281342 |
| chr12 | 116281342 | 116281739 |
| chr12 | 116281866 | 116282120 |
| chr12 | 116283606 | 116283794 |
| chr12 | 116288474 | 116288733 |
| chr12 | 116288830 | 116289040 |
| chr12 | 116289040 | 116289237 |
| chr12 | 116293646 | 116293885 |
| chr12 | 116293885 | 116294126 |
| chr12 | 116294126 | 116294369 |
| chr12 | 116294369 | 116294635 |
| chr12 | 116299211 | 116299417 |
| chr12 | 116299844 | 116300335 |
| chr12 | 116308051 | 116308266 |
| chr12 | 116313938 | 116314090 |
| chr12 | 116315267 | 116315467 |
| chr12 | 116363484 | 116363834 |
| chr12 | 116363834 | 116364241 |
| chr12 | 116389782 | 116390238 |
| chr12 | 116390329 | 116390596 |
| chr12 | 116396077 | 116396608 |
| chr12 | 116404597 | 116404881 |
| chr12 | 116404914 | 116405279 |
| chr12 | 116405279 | 116405697 |
| chr12 | 116405697 | 116406094 |
| chr12 | 116433870 | 116434048 |
| chr12 | 116441757 | 116441908 |
| chr12 | 116455805 | 116456043 |
| chr12 | 116467026 | 116467486 |
| chr12 | 116478832 | 116479055 |
| chr12 | 116485471 | 116486094 |
| chr12 | 116486113 | 116486327 |
| chr12 | 116503113 | 116503330 |
| chr12 | 116512523 | 116512817 |
| chr12 | 116539385 | 116539619 |

|       |           |           |
|-------|-----------|-----------|
| chr12 | 116553203 | 116553801 |
| chr12 | 116569585 | 116569899 |
| chr12 | 116576716 | 116577116 |
| chr12 | 116577116 | 116577518 |
| chr12 | 116577518 | 116577824 |
| chr12 | 116577824 | 116578043 |
| chr12 | 116581927 | 116582231 |
| chr12 | 116585057 | 116585400 |
| chr12 | 116587527 | 116587890 |
| chr12 | 116620007 | 116620203 |
| chr12 | 116621535 | 116621720 |
| chr12 | 116621720 | 116621970 |
| chr12 | 116622623 | 116623006 |
| chr12 | 116623006 | 116623253 |
| chr12 | 116625673 | 116625882 |
| chr12 | 116653782 | 116653979 |
| chr12 | 116762855 | 116763057 |
| chr12 | 116772459 | 116772641 |
| chr12 | 116776473 | 116776764 |
| chr12 | 117035317 | 117035536 |
| chr12 | 117077843 | 117078130 |
| chr12 | 117092590 | 117093043 |
| chr12 | 117110687 | 117110863 |
| chr12 | 117132173 | 117132323 |
| chr12 | 117153686 | 117154085 |
| chr12 | 117240075 | 117240282 |
| chr12 | 117315966 | 117316310 |
| chr12 | 117353084 | 117353234 |
| chr12 | 117385356 | 117385607 |
| chr12 | 117389573 | 117390205 |
| chr12 | 117394424 | 117394670 |
| chr12 | 117394698 | 117394961 |
| chr12 | 117394961 | 117395294 |
| chr12 | 117395372 | 117395587 |
| chr12 | 117395587 | 117395784 |
| chr12 | 117403574 | 117403825 |
| chr12 | 117403866 | 117404079 |
| chr12 | 117406978 | 117407200 |
| chr12 | 117410528 | 117410901 |
| chr12 | 117412910 | 117413084 |
| chr12 | 117427450 | 117427746 |
| chr12 | 117430665 | 117430832 |



|       |           |           |
|-------|-----------|-----------|
| chr12 | 117430866 | 117431345 |
| chr12 | 117432328 | 117432553 |
| chr12 | 117432553 | 117432849 |
| chr12 | 117432849 | 117433137 |
| chr12 | 117436551 | 117436836 |
| chr12 | 117441960 | 117442216 |
| chr12 | 117442216 | 117442456 |
| chr12 | 117443440 | 117443750 |
| chr12 | 117448276 | 117448472 |
| chr12 | 117448472 | 117448735 |
| chr12 | 117448735 | 117448985 |
| chr12 | 117450083 | 117450551 |
| chr12 | 117462505 | 117462715 |
| chr12 | 117468316 | 117468707 |
| chr12 | 117472582 | 117472906 |
| chr12 | 117472906 | 117473162 |
| chr12 | 117475656 | 117476001 |
| chr12 | 117479684 | 117479952 |
| chr12 | 117480904 | 117481177 |
| chr12 | 117481177 | 117481490 |
| chr12 | 117487689 | 117487839 |
| chr12 | 117496151 | 117496509 |
| chr12 | 117503325 | 117503478 |
| chr12 | 117505277 | 117505467 |
| chr12 | 117507867 | 117508048 |
| chr12 | 117523649 | 117523806 |
| chr12 | 117533538 | 117534031 |
| chr12 | 117534031 | 117534340 |
| chr12 | 117534340 | 117534873 |
| chr12 | 117539876 | 117540113 |
| chr12 | 117545238 | 117545724 |
| chr12 | 117569145 | 117569365 |
| chr12 | 117586168 | 117586448 |
| chr12 | 117588306 | 117588704 |
| chr12 | 117588939 | 117589091 |
| chr12 | 117667215 | 117667522 |
| chr12 | 117668546 | 117669462 |
| chr12 | 117673281 | 117673599 |
| chr12 | 117675916 | 117676093 |
| chr12 | 117676205 | 117676445 |
| chr12 | 117679698 | 117679948 |
| chr12 | 117690661 | 117690932 |

|       |           |           |
|-------|-----------|-----------|
| chr12 | 117691330 | 117691519 |
| chr12 | 117700053 | 117700270 |
| chr12 | 117709753 | 117709903 |
| chr12 | 117727499 | 117727871 |
| chr12 | 117727935 | 117728120 |
| chr12 | 117728120 | 117728312 |
| chr12 | 117728312 | 117728521 |
| chr12 | 117742554 | 117742858 |
| chr12 | 117761701 | 117762165 |
| chr12 | 117764877 | 117765185 |
| chr12 | 117767358 | 117767654 |
| chr12 | 117769204 | 117769443 |
| chr12 | 117772685 | 117772955 |
| chr12 | 117778727 | 117778976 |
| chr12 | 117820183 | 117820437 |
| chr12 | 117820631 | 117820783 |
| chr12 | 117820880 | 117821165 |
| chr12 | 117828462 | 117828635 |
| chr12 | 117834792 | 117834942 |
| chr12 | 117843201 | 117843699 |
| chr12 | 117843699 | 117844262 |
| chr12 | 117853416 | 117853606 |
| chr12 | 117861336 | 117861608 |
| chr12 | 117861608 | 117861958 |
| chr12 | 117861958 | 117862320 |
| chr12 | 117868108 | 117868258 |
| chr12 | 117888264 | 117888423 |
| chr12 | 117993475 | 117993830 |
| chr12 | 118073205 | 118073441 |
| chr12 | 118073441 | 118073622 |
| chr12 | 118073622 | 118073998 |
| chr12 | 118078429 | 118078831 |
| chr12 | 118095000 | 118095294 |
| chr12 | 118118930 | 118119105 |
| chr12 | 118177207 | 118177447 |
| chr12 | 118177447 | 118177714 |
| chr12 | 118177824 | 118178051 |
| chr12 | 118189568 | 118189874 |
| chr12 | 118193712 | 118193914 |
| chr12 | 118196309 | 118196589 |
| chr12 | 118198446 | 118198841 |
| chr12 | 118198841 | 118199115 |

|       |           |           |
|-------|-----------|-----------|
| chr12 | 118213809 | 118213976 |
| chr12 | 118263912 | 118264255 |
| chr12 | 118300867 | 118301485 |
| chr12 | 118301485 | 118301762 |
| chr12 | 118301847 | 118302168 |
| chr12 | 118302168 | 118302511 |
| chr12 | 118359313 | 118359503 |
| chr12 | 118367432 | 118367681 |
| chr12 | 118367696 | 118368048 |
| chr12 | 118368815 | 118369421 |
| chr12 | 118373568 | 118373747 |
| chr12 | 118439748 | 118439921 |
| chr12 | 118457825 | 118458067 |
| chr12 | 118548051 | 118548239 |
| chr12 | 118656584 | 118656852 |
| chr12 | 118656852 | 118657137 |
| chr12 | 118657760 | 118658032 |
| chr12 | 118658192 | 118658535 |
| chr12 | 118694453 | 118694841 |
| chr12 | 118694841 | 118695216 |
| chr12 | 118695307 | 118695678 |
| chr12 | 118701890 | 118702234 |
| chr12 | 118702339 | 118702531 |
| chr12 | 118724347 | 118724644 |
| chr12 | 118728196 | 118728471 |
| chr12 | 118728543 | 118728749 |
| chr12 | 118732597 | 118732768 |
| chr12 | 118732768 | 118732973 |
| chr12 | 118732981 | 118733341 |
| chr12 | 118747003 | 118747212 |
| chr12 | 118754164 | 118754349 |
| chr12 | 118775791 | 118776018 |
| chr12 | 118805927 | 118806310 |
| chr12 | 118806310 | 118806813 |
| chr12 | 118814552 | 118814973 |
| chr12 | 118815307 | 118815616 |
| chr12 | 118816117 | 118816533 |
| chr12 | 118824277 | 118824447 |
| chr12 | 118826277 | 118826558 |
| chr12 | 118836424 | 118837083 |
| chr12 | 118837083 | 118837429 |
| chr12 | 118846635 | 118846965 |

|       |           |           |
|-------|-----------|-----------|
| chr12 | 118846965 | 118847313 |
| chr12 | 118848109 | 118848329 |
| chr12 | 118848329 | 118848557 |
| chr12 | 118848557 | 118848858 |
| chr12 | 118848858 | 118849346 |
| chr12 | 118849370 | 118849580 |
| chr12 | 118854879 | 118855479 |
| chr12 | 118926792 | 118926942 |
| chr12 | 118930640 | 118930867 |
| chr12 | 119026461 | 119026611 |
| chr12 | 119070543 | 119070742 |
| chr12 | 119091534 | 119091725 |
| chr12 | 119099860 | 119100057 |
| chr12 | 119135033 | 119135241 |
| chr12 | 119230599 | 119230810 |
| chr12 | 119238200 | 119238514 |
| chr12 | 119238514 | 119238718 |
| chr12 | 119238718 | 119238991 |
| chr12 | 119249638 | 119249788 |
| chr12 | 119262828 | 119263184 |
| chr12 | 119265044 | 119265360 |
| chr12 | 119268213 | 119268530 |
| chr12 | 119308525 | 119308807 |
| chr12 | 119325104 | 119325284 |
| chr12 | 119330651 | 119330945 |
| chr12 | 119364967 | 119365549 |
| chr12 | 119376857 | 119377404 |
| chr12 | 119386660 | 119386963 |
| chr12 | 119387450 | 119387630 |
| chr12 | 119387770 | 119387946 |
| chr12 | 119387954 | 119388273 |
| chr12 | 119390114 | 119390438 |
| chr12 | 119390438 | 119390777 |
| chr12 | 119397921 | 119398578 |
| chr12 | 119404936 | 119405098 |
| chr12 | 119425918 | 119426150 |
| chr12 | 119426217 | 119426569 |
| chr12 | 119426569 | 119426816 |
| chr12 | 119426859 | 119427119 |
| chr12 | 119438998 | 119439492 |
| chr12 | 119440283 | 119440552 |
| chr12 | 119440555 | 119440772 |

|       |           |           |
|-------|-----------|-----------|
| chr12 | 119441211 | 119441418 |
| chr12 | 119441418 | 119441758 |
| chr12 | 119451233 | 119451430 |
| chr12 | 119470325 | 119470604 |
| chr12 | 119565976 | 119566267 |
| chr12 | 120028593 | 120029091 |
| chr13 | 3036665   | 3036846   |
| chr13 | 3037050   | 3037444   |
| chr13 | 3128247   | 3128495   |
| chr13 | 3216167   | 3216405   |
| chr13 | 3341756   | 3342049   |
| chr13 | 3355497   | 3355665   |
| chr13 | 3359709   | 3359917   |
| chr13 | 3360317   | 3360927   |
| chr13 | 3360927   | 3361198   |
| chr13 | 3361198   | 3361484   |
| chr13 | 3367369   | 3367807   |
| chr13 | 3372646   | 3372807   |
| chr13 | 3372821   | 3373353   |
| chr13 | 3373353   | 3373771   |
| chr13 | 3406182   | 3406590   |
| chr13 | 3406590   | 3406967   |
| chr13 | 3414349   | 3414514   |
| chr13 | 3417029   | 3417393   |
| chr13 | 3429579   | 3429729   |
| chr13 | 3473510   | 3473675   |
| chr13 | 3477986   | 3478361   |
| chr13 | 3478361   | 3478825   |
| chr13 | 3515479   | 3515639   |
| chr13 | 3531942   | 3532314   |
| chr13 | 3537518   | 3537890   |
| chr13 | 3537890   | 3538260   |
| chr13 | 3538260   | 3538607   |
| chr13 | 3538607   | 3538880   |
| chr13 | 3544166   | 3544367   |
| chr13 | 3544818   | 3545374   |
| chr13 | 3556112   | 3556306   |
| chr13 | 3564046   | 3564426   |
| chr13 | 3568140   | 3568290   |
| chr13 | 3610219   | 3610453   |
| chr13 | 3610453   | 3610727   |
| chr13 | 3610727   | 3611033   |

|       |         |         |
|-------|---------|---------|
| chr13 | 3611033 | 3611433 |
| chr13 | 3633864 | 3634202 |
| chr13 | 3634202 | 3634489 |
| chr13 | 3634489 | 3634747 |
| chr13 | 3635206 | 3635448 |
| chr13 | 3636774 | 3637147 |
| chr13 | 3642142 | 3642437 |
| chr13 | 3645023 | 3645186 |
| chr13 | 3665258 | 3665872 |
| chr13 | 3667652 | 3667802 |
| chr13 | 3678957 | 3679432 |
| chr13 | 3679432 | 3679760 |
| chr13 | 3680403 | 3680611 |
| chr13 | 3694675 | 3694957 |
| chr13 | 3694957 | 3695455 |
| chr13 | 3700425 | 3700705 |
| chr13 | 3700705 | 3701219 |
| chr13 | 3723709 | 3724006 |
| chr13 | 3730271 | 3730692 |
| chr13 | 3730716 | 3730866 |
| chr13 | 3743028 | 3743255 |
| chr13 | 3743255 | 3743455 |
| chr13 | 3743455 | 3743652 |
| chr13 | 3743819 | 3744093 |
| chr13 | 3744093 | 3744500 |
| chr13 | 3745336 | 3745787 |
| chr13 | 3746511 | 3746799 |
| chr13 | 3750720 | 3750996 |
| chr13 | 3756720 | 3756958 |
| chr13 | 3759541 | 3759705 |
| chr13 | 3769522 | 3769701 |
| chr13 | 3773492 | 3773744 |
| chr13 | 3776945 | 3777269 |
| chr13 | 3777269 | 3777706 |
| chr13 | 3779027 | 3779293 |
| chr13 | 3779749 | 3779949 |
| chr13 | 3779949 | 3780191 |
| chr13 | 3780563 | 3780760 |
| chr13 | 3782446 | 3783002 |
| chr13 | 3783119 | 3783292 |
| chr13 | 3807209 | 3807435 |
| chr13 | 3807518 | 3807700 |

|       |         |         |
|-------|---------|---------|
| chr13 | 3818511 | 3818695 |
| chr13 | 3821577 | 3821789 |
| chr13 | 3821796 | 3822029 |
| chr13 | 3822104 | 3822502 |
| chr13 | 3825573 | 3825766 |
| chr13 | 3831684 | 3832021 |
| chr13 | 3832021 | 3832427 |
| chr13 | 3832427 | 3832813 |
| chr13 | 3854561 | 3854791 |
| chr13 | 3862394 | 3862793 |
| chr13 | 3865386 | 3866268 |
| chr13 | 3879974 | 3880124 |
| chr13 | 3886669 | 3887158 |
| chr13 | 3890106 | 3890334 |
| chr13 | 3893214 | 3893450 |
| chr13 | 3893450 | 3893744 |
| chr13 | 3898492 | 3898742 |
| chr13 | 3901455 | 3901715 |
| chr13 | 3901715 | 3901983 |
| chr13 | 3901983 | 3902185 |
| chr13 | 3902185 | 3902439 |
| chr13 | 3902783 | 3903003 |
| chr13 | 3907269 | 3907446 |
| chr13 | 3917516 | 3917862 |
| chr13 | 3917862 | 3918075 |
| chr13 | 3918075 | 3918379 |
| chr13 | 3924587 | 3924782 |
| chr13 | 3947348 | 3947619 |
| chr13 | 3964358 | 3964572 |
| chr13 | 3964572 | 3964821 |
| chr13 | 3992106 | 3992525 |
| chr13 | 4001786 | 4002021 |
| chr13 | 4032645 | 4032811 |
| chr13 | 4059580 | 4059730 |
| chr13 | 4110575 | 4110821 |
| chr13 | 4129186 | 4129510 |
| chr13 | 4133127 | 4133357 |
| chr13 | 4150600 | 4150883 |
| chr13 | 4160370 | 4160747 |
| chr13 | 4183218 | 4183401 |
| chr13 | 4186733 | 4186942 |
| chr13 | 4190881 | 4191101 |

|       |         |         |
|-------|---------|---------|
| chr13 | 4191101 | 4191473 |
| chr13 | 4193522 | 4193719 |
| chr13 | 4206224 | 4206451 |
| chr13 | 4233329 | 4234079 |
| chr13 | 4238416 | 4238787 |
| chr13 | 4245006 | 4245335 |
| chr13 | 4245335 | 4245634 |
| chr13 | 4248161 | 4248311 |
| chr13 | 4276724 | 4276896 |
| chr13 | 4279270 | 4279686 |
| chr13 | 4281590 | 4281794 |
| chr13 | 4310958 | 4311160 |
| chr13 | 4313568 | 4313726 |
| chr13 | 4318932 | 4319116 |
| chr13 | 4364123 | 4364474 |
| chr13 | 4381919 | 4382192 |
| chr13 | 4415597 | 4415754 |
| chr13 | 4508342 | 4508550 |
| chr13 | 4537677 | 4537902 |
| chr13 | 4605905 | 4606220 |
| chr13 | 4608660 | 4608980 |
| chr13 | 4608980 | 4609469 |
| chr13 | 4662393 | 4662774 |
| chr13 | 4662774 | 4663252 |
| chr13 | 4666878 | 4667028 |
| chr13 | 4667226 | 4667383 |
| chr13 | 4667383 | 4667547 |
| chr13 | 4672384 | 4672793 |
| chr13 | 4707356 | 4707715 |
| chr13 | 4712743 | 4713094 |
| chr13 | 4714672 | 4715086 |
| chr13 | 4715169 | 4715394 |
| chr13 | 4771262 | 4772068 |
| chr13 | 4778335 | 4778556 |
| chr13 | 4778556 | 4778776 |
| chr13 | 4824543 | 4824721 |
| chr13 | 4826641 | 4827196 |
| chr13 | 4831227 | 4831470 |
| chr13 | 4936067 | 4936261 |
| chr13 | 4942575 | 4942989 |
| chr13 | 5005709 | 5005875 |
| chr13 | 5008428 | 5008714 |



|       |         |         |
|-------|---------|---------|
| chr13 | 5079316 | 5079469 |
| chr13 | 5106315 | 5106497 |
| chr13 | 5186434 | 5186689 |
| chr13 | 5211223 | 5211389 |
| chr13 | 5212522 | 5212856 |
| chr13 | 5240502 | 5240917 |
| chr13 | 5248463 | 5249001 |
| chr13 | 5249001 | 5249296 |
| chr13 | 5284659 | 5284848 |
| chr13 | 5289703 | 5289956 |
| chr13 | 5302182 | 5302664 |
| chr13 | 5318497 | 5318798 |
| chr13 | 5319048 | 5319486 |
| chr13 | 5343235 | 5343448 |
| chr13 | 5345780 | 5346110 |
| chr13 | 5346732 | 5346978 |
| chr13 | 5347098 | 5347374 |
| chr13 | 5347950 | 5348321 |
| chr13 | 5350194 | 5350391 |
| chr13 | 5373280 | 5373475 |
| chr13 | 5394215 | 5394395 |
| chr13 | 5412187 | 5412441 |
| chr13 | 5421995 | 5422227 |
| chr13 | 5423218 | 5423523 |
| chr13 | 5424027 | 5424459 |
| chr13 | 5424540 | 5424718 |
| chr13 | 5425415 | 5425742 |
| chr13 | 5444869 | 5445091 |
| chr13 | 5445091 | 5445372 |
| chr13 | 5545127 | 5545446 |
| chr13 | 5546830 | 5547089 |
| chr13 | 5549210 | 5549548 |
| chr13 | 5549575 | 5549725 |
| chr13 | 5549757 | 5550097 |
| chr13 | 5551067 | 5551362 |
| chr13 | 5558091 | 5558434 |
| chr13 | 5614744 | 5615278 |
| chr13 | 5616201 | 5616351 |
| chr13 | 5621928 | 5622142 |
| chr13 | 5623947 | 5624256 |
| chr13 | 5624256 | 5624619 |
| chr13 | 5629404 | 5629584 |

|       |         |         |
|-------|---------|---------|
| chr13 | 5657649 | 5657799 |
| chr13 | 5666630 | 5666968 |
| chr13 | 5674535 | 5675001 |
| chr13 | 5677994 | 5678359 |
| chr13 | 5680628 | 5680834 |
| chr13 | 5704304 | 5704547 |
| chr13 | 5714332 | 5714623 |
| chr13 | 5714868 | 5715018 |
| chr13 | 5724338 | 5724746 |
| chr13 | 5726475 | 5726630 |
| chr13 | 5726651 | 5726884 |
| chr13 | 5760091 | 5760335 |
| chr13 | 5769375 | 5769651 |
| chr13 | 5769651 | 5770195 |
| chr13 | 5773871 | 5774137 |
| chr13 | 5779471 | 5779725 |
| chr13 | 5791867 | 5792362 |
| chr13 | 5792362 | 5792650 |
| chr13 | 5802189 | 5802366 |
| chr13 | 5802821 | 5803205 |
| chr13 | 5803321 | 5803676 |
| chr13 | 5803676 | 5803927 |
| chr13 | 5803927 | 5804253 |
| chr13 | 5804369 | 5804600 |
| chr13 | 5822602 | 5822984 |
| chr13 | 5823198 | 5823676 |
| chr13 | 5825692 | 5826092 |
| chr13 | 5826092 | 5826555 |
| chr13 | 5837200 | 5837805 |
| chr13 | 5841464 | 5841800 |
| chr13 | 5843965 | 5844141 |
| chr13 | 5844270 | 5844795 |
| chr13 | 5844804 | 5845147 |
| chr13 | 5845147 | 5845423 |
| chr13 | 5845423 | 5845677 |
| chr13 | 5845677 | 5845948 |
| chr13 | 5859129 | 5859405 |
| chr13 | 5859668 | 5859858 |
| chr13 | 5859858 | 5860124 |
| chr13 | 5860714 | 5860958 |
| chr13 | 5861004 | 5861455 |
| chr13 | 5861455 | 5861856 |

|       |         |         |
|-------|---------|---------|
| chr13 | 5864188 | 5864566 |
| chr13 | 5866162 | 5866528 |
| chr13 | 5869986 | 5870197 |
| chr13 | 5870374 | 5870682 |
| chr13 | 5870682 | 5871025 |
| chr13 | 5871033 | 5871281 |
| chr13 | 5871390 | 5871751 |
| chr13 | 5874794 | 5874984 |
| chr13 | 5882010 | 5882201 |
| chr13 | 5886641 | 5887350 |
| chr13 | 5892565 | 5893090 |
| chr13 | 5893090 | 5893406 |
| chr13 | 5894977 | 5895189 |
| chr13 | 5913045 | 5913551 |
| chr13 | 5913551 | 5913844 |
| chr13 | 5950324 | 5950665 |
| chr13 | 5971100 | 5971571 |
| chr13 | 5993734 | 5993943 |
| chr13 | 5994119 | 5994648 |
| chr13 | 5994687 | 5994982 |
| chr13 | 6009399 | 6009777 |
| chr13 | 6009777 | 6010180 |
| chr13 | 6012318 | 6012597 |
| chr13 | 6023010 | 6023291 |
| chr13 | 6023322 | 6023673 |
| chr13 | 6023673 | 6023980 |
| chr13 | 6029460 | 6029747 |
| chr13 | 6030081 | 6030538 |
| chr13 | 6043389 | 6043942 |
| chr13 | 6077394 | 6077763 |
| chr13 | 6085751 | 6086441 |
| chr13 | 6089520 | 6089766 |
| chr13 | 6089766 | 6090106 |
| chr13 | 6109022 | 6109334 |
| chr13 | 6109334 | 6109863 |
| chr13 | 6111877 | 6112147 |
| chr13 | 6131376 | 6131895 |
| chr13 | 6153700 | 6153953 |
| chr13 | 6165178 | 6165527 |
| chr13 | 6165542 | 6165709 |
| chr13 | 6165731 | 6166263 |
| chr13 | 6167138 | 6167533 |

|       |         |         |
|-------|---------|---------|
| chr13 | 6180831 | 6180987 |
| chr13 | 6185980 | 6186214 |
| chr13 | 6191936 | 6192234 |
| chr13 | 6193023 | 6193292 |
| chr13 | 6193292 | 6193571 |
| chr13 | 6193603 | 6194119 |
| chr13 | 6200540 | 6200871 |
| chr13 | 6230336 | 6230577 |
| chr13 | 6230577 | 6230849 |
| chr13 | 6230849 | 6231137 |
| chr13 | 6236522 | 6236948 |
| chr13 | 6237149 | 6237626 |
| chr13 | 6245784 | 6246127 |
| chr13 | 6255330 | 6255735 |
| chr13 | 6255735 | 6256153 |
| chr13 | 6256153 | 6256515 |
| chr13 | 6261389 | 6261550 |
| chr13 | 6291087 | 6291347 |
| chr13 | 6315443 | 6315644 |
| chr13 | 6319181 | 6319346 |
| chr13 | 6357804 | 6358018 |
| chr13 | 6366046 | 6366342 |
| chr13 | 6367761 | 6367979 |
| chr13 | 6377929 | 6378262 |
| chr13 | 6379545 | 6379721 |
| chr13 | 6417171 | 6417471 |
| chr13 | 6419399 | 6419907 |
| chr13 | 6434812 | 6435086 |
| chr13 | 6447050 | 6447262 |
| chr13 | 6456656 | 6456841 |
| chr13 | 6467310 | 6467513 |
| chr13 | 6469067 | 6469222 |
| chr13 | 6471726 | 6471973 |
| chr13 | 6473401 | 6473647 |
| chr13 | 6473922 | 6474072 |
| chr13 | 6476156 | 6476665 |
| chr13 | 6484979 | 6485412 |
| chr13 | 6492601 | 6492875 |
| chr13 | 6506290 | 6506671 |
| chr13 | 6508470 | 6509051 |
| chr13 | 6515658 | 6515813 |
| chr13 | 6516870 | 6517285 |

|       |         |         |
|-------|---------|---------|
| chr13 | 6529182 | 6529360 |
| chr13 | 6532784 | 6532990 |
| chr13 | 6547463 | 6547652 |
| chr13 | 6547678 | 6548297 |
| chr13 | 6548297 | 6548601 |
| chr13 | 6553808 | 6553984 |
| chr13 | 6576154 | 6576432 |
| chr13 | 6595434 | 6595681 |
| chr13 | 6606263 | 6606440 |
| chr13 | 6607787 | 6607937 |
| chr13 | 6614079 | 6614432 |
| chr13 | 6618759 | 6619043 |
| chr13 | 6624056 | 6624577 |
| chr13 | 6624577 | 6624950 |
| chr13 | 6626639 | 6626866 |
| chr13 | 6626866 | 6627117 |
| chr13 | 6635752 | 6635976 |
| chr13 | 6635976 | 6636321 |
| chr13 | 6637066 | 6637250 |
| chr13 | 6646359 | 6646546 |
| chr13 | 6647011 | 6647407 |
| chr13 | 6647407 | 6647658 |
| chr13 | 6647687 | 6647965 |
| chr13 | 6647965 | 6648223 |
| chr13 | 6648249 | 6648442 |
| chr13 | 6648445 | 6649023 |
| chr13 | 6659450 | 6659600 |
| chr13 | 6689135 | 6689343 |
| chr13 | 6690018 | 6690296 |
| chr13 | 6807757 | 6807953 |
| chr13 | 6836822 | 6836983 |
| chr13 | 6897697 | 6898010 |
| chr13 | 6898051 | 6898230 |
| chr13 | 7057672 | 7057860 |
| chr13 | 7059064 | 7059342 |
| chr13 | 7059440 | 7059618 |
| chr13 | 7535327 | 7535477 |
| chr13 | 7593699 | 7593907 |
| chr13 | 7629164 | 7629408 |
| chr13 | 7634156 | 7634335 |
| chr13 | 7640795 | 7641193 |
| chr13 | 7648090 | 7648295 |

|       |         |         |
|-------|---------|---------|
| chr13 | 7721355 | 7721622 |
| chr13 | 7721622 | 7721960 |
| chr13 | 7900233 | 7900383 |
| chr13 | 8133980 | 8134203 |
| chr13 | 8406122 | 8406436 |
| chr13 | 8456848 | 8457388 |
| chr13 | 8645207 | 8645632 |
| chr13 | 8645686 | 8646036 |
| chr13 | 8727580 | 8727851 |
| chr13 | 8731291 | 8731654 |
| chr13 | 8744625 | 8744901 |
| chr13 | 8755061 | 8755407 |
| chr13 | 8755407 | 8755754 |
| chr13 | 8755754 | 8755994 |
| chr13 | 8780474 | 8780814 |
| chr13 | 8782515 | 8782869 |
| chr13 | 8785319 | 8785545 |
| chr13 | 8805804 | 8806295 |
| chr13 | 8807006 | 8807180 |
| chr13 | 8818666 | 8818895 |
| chr13 | 8828989 | 8829299 |
| chr13 | 8829888 | 8830038 |
| chr13 | 8830154 | 8830404 |
| chr13 | 8831402 | 8831633 |
| chr13 | 8831633 | 8831939 |
| chr13 | 8831939 | 8832203 |
| chr13 | 8832901 | 8833086 |
| chr13 | 8841038 | 8841300 |
| chr13 | 8847806 | 8848040 |
| chr13 | 8870522 | 8870727 |
| chr13 | 8870727 | 8870950 |
| chr13 | 8870950 | 8871188 |
| chr13 | 8871188 | 8871526 |
| chr13 | 8871526 | 8871934 |
| chr13 | 8885397 | 8885717 |
| chr13 | 8885717 | 8886259 |
| chr13 | 8893567 | 8893847 |
| chr13 | 8893847 | 8894070 |
| chr13 | 8894649 | 8894878 |
| chr13 | 8894956 | 8895182 |
| chr13 | 8895425 | 8895627 |
| chr13 | 8943914 | 8944164 |

|       |         |         |
|-------|---------|---------|
| chr13 | 8944905 | 8945404 |
| chr13 | 8949742 | 8950194 |
| chr13 | 8955864 | 8956188 |
| chr13 | 8956958 | 8957166 |
| chr13 | 8960029 | 8960212 |
| chr13 | 8960231 | 8960562 |
| chr13 | 8961072 | 8961248 |
| chr13 | 8961248 | 8961449 |
| chr13 | 8961574 | 8961849 |
| chr13 | 8962818 | 8963090 |
| chr13 | 8965537 | 8965735 |
| chr13 | 8966688 | 8966867 |
| chr13 | 8995506 | 8995878 |
| chr13 | 8995878 | 8996371 |
| chr13 | 8996371 | 8996733 |
| chr13 | 9002110 | 9002319 |
| chr13 | 9011710 | 9011884 |
| chr13 | 9013500 | 9013830 |
| chr13 | 9014313 | 9014934 |
| chr13 | 9017180 | 9017454 |
| chr13 | 9026762 | 9027172 |
| chr13 | 9027172 | 9027591 |
| chr13 | 9032104 | 9032358 |
| chr13 | 9032375 | 9032571 |
| chr13 | 9037475 | 9037684 |
| chr13 | 9055024 | 9055209 |
| chr13 | 9061333 | 9061921 |
| chr13 | 9073803 | 9074244 |
| chr13 | 9080559 | 9080759 |
| chr13 | 9082256 | 9082506 |
| chr13 | 9093376 | 9093666 |
| chr13 | 9093666 | 9094019 |
| chr13 | 9094019 | 9094355 |
| chr13 | 9094355 | 9094616 |
| chr13 | 9094618 | 9094836 |
| chr13 | 9099369 | 9099621 |
| chr13 | 9100451 | 9100832 |
| chr13 | 9107538 | 9107798 |
| chr13 | 9113821 | 9114100 |
| chr13 | 9128639 | 9129351 |
| chr13 | 9139533 | 9139924 |
| chr13 | 9139924 | 9140252 |

|       |         |         |
|-------|---------|---------|
| chr13 | 9140252 | 9140576 |
| chr13 | 9162234 | 9162516 |
| chr13 | 9167539 | 9167782 |
| chr13 | 9167908 | 9168428 |
| chr13 | 9176672 | 9176883 |
| chr13 | 9181944 | 9182196 |
| chr13 | 9184361 | 9184558 |
| chr13 | 9184558 | 9184768 |
| chr13 | 9190901 | 9191615 |
| chr13 | 9198231 | 9198500 |
| chr13 | 9199185 | 9199444 |
| chr13 | 9199444 | 9199809 |
| chr13 | 9203693 | 9203947 |
| chr13 | 9239120 | 9239387 |
| chr13 | 9239387 | 9239664 |
| chr13 | 9239664 | 9239950 |
| chr13 | 9239950 | 9240189 |
| chr13 | 9255401 | 9255625 |
| chr13 | 9271895 | 9272123 |
| chr13 | 9276319 | 9276929 |
| chr13 | 9276929 | 9277379 |
| chr13 | 9277379 | 9277741 |
| chr13 | 9297860 | 9298023 |
| chr13 | 9314187 | 9314383 |
| chr13 | 9325344 | 9325580 |
| chr13 | 9340262 | 9340671 |
| chr13 | 9340733 | 9340884 |
| chr13 | 9342833 | 9343022 |
| chr13 | 9353879 | 9354227 |
| chr13 | 9450354 | 9450587 |
| chr13 | 9454913 | 9455071 |
| chr13 | 9467329 | 9467552 |
| chr13 | 9482809 | 9483148 |
| chr13 | 9494787 | 9495085 |
| chr13 | 9507949 | 9508101 |
| chr13 | 9562993 | 9563164 |
| chr13 | 9589246 | 9589497 |
| chr13 | 9636045 | 9636301 |
| chr13 | 9636591 | 9636802 |
| chr13 | 9695446 | 9695771 |
| chr13 | 9695771 | 9696223 |
| chr13 | 9696364 | 9696598 |



|       |          |          |
|-------|----------|----------|
| chr13 | 9696598  | 9696847  |
| chr13 | 9720130  | 9720283  |
| chr13 | 9749685  | 9749917  |
| chr13 | 9749925  | 9750263  |
| chr13 | 9750399  | 9750606  |
| chr13 | 9763092  | 9763444  |
| chr13 | 9763444  | 9763721  |
| chr13 | 9763721  | 9764011  |
| chr13 | 9764011  | 9764301  |
| chr13 | 9764301  | 9764575  |
| chr13 | 9764575  | 9764840  |
| chr13 | 9764840  | 9765313  |
| chr13 | 9767439  | 9767627  |
| chr13 | 9772735  | 9772946  |
| chr13 | 9773184  | 9773628  |
| chr13 | 9773674  | 9773839  |
| chr13 | 9773839  | 9773943  |
| chr13 | 9834232  | 9834589  |
| chr13 | 9844110  | 9844313  |
| chr13 | 9846857  | 9847138  |
| chr13 | 9869053  | 9869215  |
| chr13 | 9882350  | 9882652  |
| chr13 | 9884824  | 9885052  |
| chr13 | 9929975  | 9930258  |
| chr13 | 10040800 | 10040971 |
| chr13 | 10049641 | 10049857 |
| chr13 | 10354806 | 10355145 |
| chr13 | 10357389 | 10357636 |
| chr13 | 10375640 | 10375798 |
| chr13 | 10636889 | 10637118 |
| chr13 | 10710676 | 10710976 |
| chr13 | 10732681 | 10732946 |
| chr13 | 10938804 | 10938977 |
| chr13 | 10947685 | 10947993 |
| chr13 | 11191342 | 11191670 |
| chr13 | 11193220 | 11193590 |
| chr13 | 11218187 | 11218359 |
| chr13 | 11290030 | 11290294 |
| chr13 | 11291638 | 11291871 |
| chr13 | 11291898 | 11292371 |
| chr13 | 11432494 | 11432736 |
| chr13 | 11432770 | 11433054 |

|       |          |          |
|-------|----------|----------|
| chr13 | 11433054 | 11433288 |
| chr13 | 11453080 | 11453375 |
| chr13 | 11532077 | 11532309 |
| chr13 | 11532997 | 11533152 |
| chr13 | 11533168 | 11533652 |
| chr13 | 11543943 | 11544195 |
| chr13 | 11549125 | 11549610 |
| chr13 | 11563722 | 11563944 |
| chr13 | 11564573 | 11564781 |
| chr13 | 11566307 | 11566683 |
| chr13 | 11566683 | 11566913 |
| chr13 | 11566913 | 11567169 |
| chr13 | 11807960 | 11808236 |
| chr13 | 11809479 | 11809658 |
| chr13 | 11905037 | 11905495 |
| chr13 | 11908237 | 11908476 |
| chr13 | 11959850 | 11960196 |
| chr13 | 12106610 | 12106880 |
| chr13 | 12106880 | 12107123 |
| chr13 | 12109060 | 12109247 |
| chr13 | 12132229 | 12132485 |
| chr13 | 12133545 | 12133880 |
| chr13 | 12150388 | 12150707 |
| chr13 | 12210348 | 12210622 |
| chr13 | 12223684 | 12223906 |
| chr13 | 12242985 | 12243254 |
| chr13 | 12257590 | 12257814 |
| chr13 | 12257814 | 12258056 |
| chr13 | 12258056 | 12258400 |
| chr13 | 12264637 | 12265023 |
| chr13 | 12265023 | 12265233 |
| chr13 | 12267166 | 12267408 |
| chr13 | 12293775 | 12294070 |
| chr13 | 12307352 | 12307600 |
| chr13 | 12331501 | 12331781 |
| chr13 | 12340450 | 12340601 |
| chr13 | 12340640 | 12340998 |
| chr13 | 12394733 | 12395008 |
| chr13 | 12395008 | 12395284 |
| chr13 | 12395284 | 12395591 |
| chr13 | 12395591 | 12395945 |
| chr13 | 12442080 | 12442266 |

|       |          |          |
|-------|----------|----------|
| chr13 | 12442308 | 12442567 |
| chr13 | 12460437 | 12460787 |
| chr13 | 12460911 | 12461359 |
| chr13 | 12461359 | 12461745 |
| chr13 | 12461745 | 12462048 |
| chr13 | 12468556 | 12468767 |
| chr13 | 12469644 | 12469840 |
| chr13 | 12473734 | 12474083 |
| chr13 | 12474113 | 12474272 |
| chr13 | 12488129 | 12488305 |
| chr13 | 12506888 | 12507066 |
| chr13 | 12519988 | 12520182 |
| chr13 | 12520187 | 12520559 |
| chr13 | 12542059 | 12542629 |
| chr13 | 12550518 | 12550712 |
| chr13 | 12565431 | 12565979 |
| chr13 | 12565979 | 12566411 |
| chr13 | 12589102 | 12589326 |
| chr13 | 12608687 | 12608967 |
| chr13 | 12626294 | 12626531 |
| chr13 | 12629955 | 12630243 |
| chr13 | 12630243 | 12630433 |
| chr13 | 12634891 | 12635248 |
| chr13 | 12635248 | 12635656 |
| chr13 | 12637373 | 12637543 |
| chr13 | 12638443 | 12638690 |
| chr13 | 12640832 | 12641187 |
| chr13 | 12642064 | 12642319 |
| chr13 | 12642319 | 12642571 |
| chr13 | 12645497 | 12645750 |
| chr13 | 12649393 | 12649552 |
| chr13 | 12649838 | 12650046 |
| chr13 | 12650046 | 12650302 |
| chr13 | 12650302 | 12650491 |
| chr13 | 12650491 | 12650659 |
| chr13 | 12650659 | 12650887 |
| chr13 | 12650887 | 12651115 |
| chr13 | 12667802 | 12668061 |
| chr13 | 12668061 | 12668309 |
| chr13 | 12680643 | 12680840 |
| chr13 | 12702910 | 12703597 |
| chr13 | 12703653 | 12703876 |

|       |          |          |
|-------|----------|----------|
| chr13 | 12703881 | 12704218 |
| chr13 | 12705758 | 12705997 |
| chr13 | 12705997 | 12706294 |
| chr13 | 12781199 | 12781349 |
| chr13 | 12781489 | 12781811 |
| chr13 | 12784823 | 12784994 |
| chr13 | 12788603 | 12788755 |
| chr13 | 12789099 | 12789302 |
| chr13 | 12793811 | 12793963 |
| chr13 | 12799936 | 12800454 |
| chr13 | 12802358 | 12802899 |
| chr13 | 12808529 | 12809168 |
| chr13 | 12809195 | 12809364 |
| chr13 | 12812796 | 12813018 |
| chr13 | 12813383 | 12813545 |
| chr13 | 12813869 | 12814239 |
| chr13 | 12814239 | 12814544 |
| chr13 | 12818601 | 12819032 |
| chr13 | 12848358 | 12848575 |
| chr13 | 12851212 | 12851424 |
| chr13 | 12859658 | 12859809 |
| chr13 | 12864274 | 12864641 |
| chr13 | 12889038 | 12889321 |
| chr13 | 12889683 | 12889896 |
| chr13 | 12902422 | 12902618 |
| chr13 | 12906244 | 12906445 |
| chr13 | 12908546 | 12908696 |
| chr13 | 12908780 | 12909027 |
| chr13 | 12911170 | 12911403 |
| chr13 | 12917649 | 12917799 |
| chr13 | 12925614 | 12925935 |
| chr13 | 12925935 | 12926144 |
| chr13 | 12926194 | 12926346 |
| chr13 | 12931567 | 12931763 |
| chr13 | 12931904 | 12932402 |
| chr13 | 12935256 | 12935428 |
| chr13 | 12935778 | 12936024 |
| chr13 | 12937782 | 12937941 |
| chr13 | 12986535 | 12986841 |
| chr13 | 12986841 | 12987182 |
| chr13 | 12990129 | 12990291 |
| chr13 | 12990422 | 12990609 |

|       |          |          |
|-------|----------|----------|
| chr13 | 12993847 | 12994105 |
| chr13 | 12994435 | 12994617 |
| chr13 | 12994929 | 12995089 |
| chr13 | 12995092 | 12995253 |
| chr13 | 12999007 | 12999252 |
| chr13 | 13005248 | 13005782 |
| chr13 | 13007765 | 13008208 |
| chr13 | 13013818 | 13014708 |
| chr13 | 13024676 | 13025011 |
| chr13 | 13025691 | 13026165 |
| chr13 | 13026165 | 13026460 |
| chr13 | 13030553 | 13030979 |
| chr13 | 13067298 | 13067498 |
| chr13 | 13076262 | 13076682 |
| chr13 | 13093648 | 13093949 |
| chr13 | 13126791 | 13126967 |
| chr13 | 13162874 | 13163484 |
| chr13 | 13168385 | 13168752 |
| chr13 | 13168752 | 13169118 |
| chr13 | 13169814 | 13170012 |
| chr13 | 13173446 | 13173743 |
| chr13 | 13173743 | 13174075 |
| chr13 | 13174075 | 13174310 |
| chr13 | 13179927 | 13180438 |
| chr13 | 13182385 | 13182565 |
| chr13 | 13216367 | 13216730 |
| chr13 | 13232753 | 13232958 |
| chr13 | 13273779 | 13273965 |
| chr13 | 13328973 | 13329202 |
| chr13 | 13349430 | 13349581 |
| chr13 | 13352109 | 13352624 |
| chr13 | 13352723 | 13352936 |
| chr13 | 13362363 | 13362581 |
| chr13 | 13368973 | 13369169 |
| chr13 | 13369914 | 13370243 |
| chr13 | 13378163 | 13378510 |
| chr13 | 13378510 | 13378911 |
| chr13 | 13380631 | 13380814 |
| chr13 | 13381709 | 13381956 |
| chr13 | 13384098 | 13384450 |
| chr13 | 13385322 | 13385585 |
| chr13 | 13385585 | 13385838 |

|       |          |          |
|-------|----------|----------|
| chr13 | 13388721 | 13389005 |
| chr13 | 13392603 | 13392766 |
| chr13 | 13392855 | 13393005 |
| chr13 | 13393046 | 13393372 |
| chr13 | 13393372 | 13393917 |
| chr13 | 13393917 | 13394322 |
| chr13 | 13404206 | 13404412 |
| chr13 | 13404564 | 13404913 |
| chr13 | 13404924 | 13405099 |
| chr13 | 13415456 | 13415673 |
| chr13 | 13438204 | 13438906 |
| chr13 | 13438989 | 13439207 |
| chr13 | 13439212 | 13439549 |
| chr13 | 13441079 | 13441323 |
| chr13 | 13441323 | 13441628 |
| chr13 | 13460494 | 13460968 |
| chr13 | 13463953 | 13464328 |
| chr13 | 13471485 | 13471868 |
| chr13 | 13472824 | 13473268 |
| chr13 | 13474586 | 13474826 |
| chr13 | 13474865 | 13475463 |
| chr13 | 13482049 | 13482229 |
| chr13 | 13491354 | 13491638 |
| chr13 | 13493427 | 13493964 |
| chr13 | 13515074 | 13515269 |
| chr13 | 13516711 | 13516872 |
| chr13 | 13516898 | 13517227 |
| chr13 | 13517802 | 13517952 |
| chr13 | 13529060 | 13529328 |
| chr13 | 13529328 | 13529761 |
| chr13 | 13537699 | 13537919 |
| chr13 | 13538445 | 13538911 |
| chr13 | 13538911 | 13539185 |
| chr13 | 13539427 | 13539719 |
| chr13 | 13551922 | 13552426 |
| chr13 | 13562701 | 13562976 |
| chr13 | 13564175 | 13564460 |
| chr13 | 13572446 | 13572691 |
| chr13 | 13572958 | 13573291 |
| chr13 | 13573508 | 13573838 |
| chr13 | 13573838 | 13574228 |
| chr13 | 13590061 | 13590316 |

|       |          |          |
|-------|----------|----------|
| chr13 | 13590316 | 13590601 |
| chr13 | 13590601 | 13591080 |
| chr13 | 13601498 | 13601732 |
| chr13 | 13612936 | 13613208 |
| chr13 | 13637659 | 13637898 |
| chr13 | 13745962 | 13746330 |
| chr13 | 13752927 | 13753253 |
| chr13 | 13753253 | 13753533 |
| chr13 | 13753533 | 13753721 |
| chr13 | 13753727 | 13754002 |
| chr13 | 13754959 | 13755315 |
| chr13 | 13783808 | 13784126 |
| chr13 | 13784126 | 13784444 |
| chr13 | 13784444 | 13784721 |
| chr13 | 13784721 | 13784946 |
| chr13 | 13785079 | 13785333 |
| chr13 | 13792082 | 13792302 |
| chr13 | 13824402 | 13824557 |
| chr13 | 13845028 | 13845374 |
| chr13 | 13845374 | 13845561 |
| chr13 | 13860540 | 13860816 |
| chr13 | 13860816 | 13861056 |
| chr13 | 13862912 | 13863315 |
| chr13 | 13867165 | 13867414 |
| chr13 | 13867414 | 13867663 |
| chr13 | 13868022 | 13868229 |
| chr13 | 13889437 | 13889768 |
| chr13 | 13889768 | 13890058 |
| chr13 | 13953947 | 13954314 |
| chr13 | 13954314 | 13954860 |
| chr13 | 13954860 | 13955364 |
| chr13 | 13968434 | 13968820 |
| chr13 | 13968820 | 13969187 |
| chr13 | 13981946 | 13982140 |
| chr13 | 14020394 | 14020668 |
| chr13 | 14022094 | 14022288 |
| chr13 | 14022905 | 14023275 |
| chr13 | 14024703 | 14024915 |
| chr13 | 14033820 | 14034365 |
| chr13 | 14039262 | 14039547 |
| chr13 | 14039547 | 14040027 |
| chr13 | 14040306 | 14040658 |

|       |          |          |
|-------|----------|----------|
| chr13 | 14049864 | 14050180 |
| chr13 | 14056920 | 14057124 |
| chr13 | 14057124 | 14057332 |
| chr13 | 14057332 | 14057556 |
| chr13 | 14062982 | 14063325 |
| chr13 | 14063325 | 14063782 |
| chr13 | 14063782 | 14064256 |
| chr13 | 14064855 | 14065005 |
| chr13 | 14095262 | 14095620 |
| chr13 | 14115486 | 14115746 |
| chr13 | 14165174 | 14165389 |
| chr13 | 14225152 | 14225402 |
| chr13 | 14225615 | 14225772 |
| chr13 | 14355417 | 14355589 |
| chr13 | 14418290 | 14418562 |
| chr13 | 14424170 | 14424611 |
| chr13 | 14428826 | 14429210 |
| chr13 | 14485068 | 14485296 |
| chr13 | 14496918 | 14497536 |
| chr13 | 14497673 | 14497900 |
| chr13 | 14514049 | 14514214 |
| chr13 | 14522136 | 14522538 |
| chr13 | 14522538 | 14522943 |
| chr13 | 14522943 | 14523278 |
| chr13 | 14557549 | 14557763 |
| chr13 | 14557763 | 14557961 |
| chr13 | 14585031 | 14585369 |
| chr13 | 14589732 | 14590029 |
| chr13 | 14612804 | 14613110 |
| chr13 | 14613110 | 14613321 |
| chr13 | 14613321 | 14613660 |
| chr13 | 14618757 | 14619112 |
| chr13 | 14619305 | 14619473 |
| chr13 | 14629851 | 14630102 |
| chr13 | 14630102 | 14630717 |
| chr13 | 14669091 | 14669413 |
| chr13 | 14671974 | 14672124 |
| chr13 | 15384235 | 15384451 |
| chr13 | 15462838 | 15463432 |
| chr13 | 15463432 | 15463751 |
| chr13 | 15463751 | 15464159 |
| chr13 | 15464166 | 15464533 |



|       |          |          |
|-------|----------|----------|
| chr13 | 15514104 | 15514409 |
| chr13 | 15537209 | 15537588 |
| chr13 | 15537698 | 15538068 |
| chr13 | 15538111 | 15538282 |
| chr13 | 15538450 | 15538739 |
| chr13 | 15550732 | 15551068 |
| chr13 | 15561507 | 15561727 |
| chr13 | 15624897 | 15625066 |
| chr13 | 15638228 | 15638480 |
| chr13 | 15660350 | 15660593 |
| chr13 | 15660593 | 15660822 |
| chr13 | 15660822 | 15661065 |
| chr13 | 15707474 | 15707683 |
| chr13 | 15715292 | 15715453 |
| chr13 | 15741780 | 15742178 |
| chr13 | 15759144 | 15759455 |
| chr13 | 15759495 | 15759676 |
| chr13 | 15762392 | 15762701 |
| chr13 | 15763101 | 15763329 |
| chr13 | 15767397 | 15767587 |
| chr13 | 15773463 | 15773695 |
| chr13 | 15776504 | 15776658 |
| chr13 | 15776845 | 15777009 |
| chr13 | 15777676 | 15777912 |
| chr13 | 15786398 | 15786624 |
| chr13 | 15802468 | 15802732 |
| chr13 | 15803971 | 15804284 |
| chr13 | 15806624 | 15806989 |
| chr13 | 15806989 | 15807423 |
| chr13 | 15830586 | 15830968 |
| chr13 | 15845682 | 15846156 |
| chr13 | 15846156 | 15846579 |
| chr13 | 15846602 | 15846842 |
| chr13 | 15848070 | 15848255 |
| chr13 | 15853046 | 15853545 |
| chr13 | 15854041 | 15854203 |
| chr13 | 15863009 | 15863256 |
| chr13 | 15863313 | 15863806 |
| chr13 | 15875351 | 15875515 |
| chr13 | 15891290 | 15891581 |
| chr13 | 15907745 | 15908159 |
| chr13 | 15982520 | 15982755 |

|       |          |          |
|-------|----------|----------|
| chr13 | 15985120 | 15985362 |
| chr13 | 15992417 | 15992623 |
| chr13 | 15993939 | 15994165 |
| chr13 | 16005609 | 16005822 |
| chr13 | 16007750 | 16008038 |
| chr13 | 16009189 | 16009408 |
| chr13 | 16009901 | 16010051 |
| chr13 | 16011119 | 16011406 |
| chr13 | 16011406 | 16011642 |
| chr13 | 16011820 | 16012161 |
| chr13 | 16012224 | 16012533 |
| chr13 | 16012533 | 16012773 |
| chr13 | 16014190 | 16014494 |
| chr13 | 16016535 | 16016789 |
| chr13 | 16017332 | 16017542 |
| chr13 | 16017542 | 16017771 |
| chr13 | 16017771 | 16017975 |
| chr13 | 16019118 | 16019374 |
| chr13 | 16020788 | 16020938 |
| chr13 | 16030684 | 16030961 |
| chr13 | 16156756 | 16157111 |
| chr13 | 16175933 | 16176188 |
| chr13 | 16191103 | 16191253 |
| chr13 | 16208389 | 16208648 |
| chr13 | 16208698 | 16209256 |
| chr13 | 16211403 | 16211722 |
| chr13 | 16216256 | 16216777 |
| chr13 | 16216887 | 16217043 |
| chr13 | 16219881 | 16220218 |
| chr13 | 16222762 | 16223276 |
| chr13 | 16239215 | 16239565 |
| chr13 | 16242377 | 16242712 |
| chr13 | 16296269 | 16296764 |
| chr13 | 16299835 | 16300168 |
| chr13 | 16334364 | 16334578 |
| chr13 | 16414803 | 16415073 |
| chr13 | 16433613 | 16434016 |
| chr13 | 16435544 | 16435924 |
| chr13 | 16453041 | 16453997 |
| chr13 | 16456286 | 16456557 |
| chr13 | 16486966 | 16487564 |
| chr13 | 16490764 | 16490959 |

|       |          |          |
|-------|----------|----------|
| chr13 | 16498107 | 16498362 |
| chr13 | 16499125 | 16499360 |
| chr13 | 16529761 | 16530068 |
| chr13 | 16532207 | 16532384 |
| chr13 | 16543035 | 16543220 |
| chr13 | 16549803 | 16550463 |
| chr13 | 16564345 | 16564621 |
| chr13 | 16564971 | 16565291 |
| chr13 | 16571284 | 16571736 |
| chr13 | 16578282 | 16578555 |
| chr13 | 16641634 | 16641944 |
| chr13 | 16641944 | 16642395 |
| chr13 | 16657405 | 16657806 |
| chr13 | 16659225 | 16659612 |
| chr13 | 16659612 | 16659861 |
| chr13 | 16659861 | 16660327 |
| chr13 | 16668676 | 16669065 |
| chr13 | 16670129 | 16670427 |
| chr13 | 16670427 | 16670724 |
| chr13 | 16670799 | 16671049 |
| chr13 | 16676934 | 16677187 |
| chr13 | 16678363 | 16678517 |
| chr13 | 16696340 | 16696696 |
| chr13 | 16715362 | 16715610 |
| chr13 | 16715610 | 16716059 |
| chr13 | 16717463 | 16717706 |
| chr13 | 16718024 | 16718199 |
| chr13 | 16732409 | 16732560 |
| chr13 | 16738266 | 16738729 |
| chr13 | 16738794 | 16738944 |
| chr13 | 16739356 | 16740002 |
| chr13 | 16746338 | 16746899 |
| chr13 | 16756274 | 16756583 |
| chr13 | 16760054 | 16760404 |
| chr13 | 16761037 | 16761795 |
| chr13 | 16763085 | 16763564 |
| chr13 | 16763824 | 16764087 |
| chr13 | 16801432 | 16801598 |
| chr13 | 16805546 | 16806028 |
| chr13 | 16828491 | 16828720 |
| chr13 | 16835135 | 16835552 |
| chr13 | 16838227 | 16838392 |

|       |          |          |
|-------|----------|----------|
| chr13 | 16838413 | 16838809 |
| chr13 | 16846623 | 16846808 |
| chr13 | 16846808 | 16847013 |
| chr13 | 16847203 | 16847604 |
| chr13 | 16847604 | 16848138 |
| chr13 | 17000047 | 17000248 |
| chr13 | 17000390 | 17000566 |
| chr13 | 17028697 | 17028878 |
| chr13 | 17049291 | 17049530 |
| chr13 | 17211768 | 17211924 |
| chr13 | 17212092 | 17212297 |
| chr13 | 17212450 | 17212677 |
| chr13 | 17212682 | 17213120 |
| chr13 | 17213120 | 17213565 |
| chr13 | 17228407 | 17228600 |
| chr13 | 17354861 | 17355130 |
| chr13 | 17406338 | 17406488 |
| chr13 | 17419635 | 17420019 |
| chr13 | 17420108 | 17420260 |
| chr13 | 17428405 | 17428561 |
| chr13 | 17432612 | 17432772 |
| chr13 | 17458058 | 17458245 |
| chr13 | 17492837 | 17493266 |
| chr13 | 17494019 | 17494570 |
| chr13 | 17495023 | 17495191 |
| chr13 | 17511119 | 17511510 |
| chr13 | 17511510 | 17511869 |
| chr13 | 17581747 | 17581980 |
| chr13 | 17584892 | 17585127 |
| chr13 | 17603650 | 17604221 |
| chr13 | 17604681 | 17605098 |
| chr13 | 17606834 | 17607028 |
| chr13 | 17614102 | 17614379 |
| chr13 | 17614682 | 17615065 |
| chr13 | 17636590 | 17636872 |
| chr13 | 17660466 | 17660710 |
| chr13 | 17670127 | 17670569 |
| chr13 | 17670689 | 17670921 |
| chr13 | 17685838 | 17686165 |
| chr13 | 17687044 | 17687314 |
| chr13 | 17689800 | 17690068 |
| chr13 | 17693822 | 17694149 |

|       |          |          |
|-------|----------|----------|
| chr13 | 17694525 | 17694854 |
| chr13 | 17694854 | 17695265 |
| chr13 | 17695265 | 17695539 |
| chr13 | 17695539 | 17695745 |
| chr13 | 17697848 | 17698116 |
| chr13 | 17704492 | 17705040 |
| chr13 | 17705040 | 17705467 |
| chr13 | 17705467 | 17705810 |
| chr13 | 17705854 | 17706103 |
| chr13 | 17714209 | 17714554 |
| chr13 | 17746225 | 17746444 |
| chr13 | 17781906 | 17782162 |
| chr13 | 17784117 | 17784486 |
| chr13 | 17795843 | 17796036 |
| chr13 | 17803321 | 17804094 |
| chr13 | 17804132 | 17804354 |
| chr13 | 17804432 | 17804904 |
| chr13 | 17804904 | 17805296 |
| chr13 | 17805296 | 17805694 |
| chr13 | 17837607 | 17838099 |
| chr13 | 17838099 | 17838509 |
| chr13 | 17838539 | 17838807 |
| chr13 | 17839113 | 17839313 |
| chr13 | 17839313 | 17839525 |
| chr13 | 17870718 | 17870935 |
| chr13 | 17884305 | 17884467 |
| chr13 | 17900591 | 17901046 |
| chr13 | 17901046 | 17901357 |
| chr13 | 17901487 | 17901834 |
| chr13 | 17902255 | 17902512 |
| chr13 | 17943274 | 17943449 |
| chr13 | 17943449 | 17943614 |
| chr13 | 17943659 | 17944072 |
| chr13 | 17944072 | 17944692 |
| chr13 | 17967368 | 17967570 |
| chr13 | 17969847 | 17969997 |
| chr13 | 17975516 | 17975791 |
| chr13 | 17975811 | 17976331 |
| chr13 | 17983240 | 17983517 |
| chr13 | 17992779 | 17993003 |
| chr13 | 17993003 | 17993254 |
| chr13 | 17993254 | 17993590 |

|       |          |          |
|-------|----------|----------|
| chr13 | 18012846 | 18013123 |
| chr13 | 18056585 | 18056753 |
| chr13 | 18056942 | 18057122 |
| chr13 | 18057299 | 18057539 |
| chr13 | 18174085 | 18174271 |
| chr13 | 18195705 | 18196127 |
| chr13 | 18196127 | 18196386 |
| chr13 | 18196842 | 18197323 |
| chr13 | 18303049 | 18303233 |
| chr13 | 18303618 | 18303869 |
| chr13 | 18306793 | 18307158 |
| chr13 | 18309699 | 18309967 |
| chr13 | 18325836 | 18326054 |
| chr13 | 18330379 | 18330804 |
| chr13 | 18400568 | 18400723 |
| chr13 | 18717134 | 18717596 |
| chr13 | 18730728 | 18730906 |
| chr13 | 18737794 | 18738143 |
| chr13 | 18743926 | 18744219 |
| chr13 | 18757431 | 18757649 |
| chr13 | 18757715 | 18757875 |
| chr13 | 18810080 | 18810302 |
| chr13 | 18820747 | 18820932 |
| chr13 | 18843553 | 18843944 |
| chr13 | 18847417 | 18847744 |
| chr13 | 18849632 | 18849785 |
| chr13 | 18868071 | 18868285 |
| chr13 | 18868285 | 18868706 |
| chr13 | 18868708 | 18868879 |
| chr13 | 18869695 | 18869853 |
| chr13 | 18875507 | 18875806 |
| chr13 | 18875806 | 18876284 |
| chr13 | 18876368 | 18876575 |
| chr13 | 18892092 | 18892354 |
| chr13 | 18948101 | 18948484 |
| chr13 | 18948538 | 18948722 |
| chr13 | 18948722 | 18948941 |
| chr13 | 19026972 | 19027222 |
| chr13 | 19133933 | 19134138 |
| chr13 | 19156533 | 19156777 |
| chr13 | 19156777 | 19156990 |
| chr13 | 19158599 | 19158751 |

|       |          |          |
|-------|----------|----------|
| chr13 | 19177666 | 19178004 |
| chr13 | 19242693 | 19242876 |
| chr13 | 19304352 | 19304570 |
| chr13 | 19308905 | 19309221 |
| chr13 | 19322781 | 19323109 |
| chr13 | 19330441 | 19330743 |
| chr13 | 19332383 | 19332703 |
| chr13 | 19336970 | 19337306 |
| chr13 | 19338700 | 19338977 |
| chr13 | 19339828 | 19340060 |
| chr13 | 19342033 | 19342186 |
| chr13 | 19343241 | 19343592 |
| chr13 | 19350807 | 19351328 |
| chr13 | 19351350 | 19351500 |
| chr13 | 19355306 | 19355640 |
| chr13 | 19358013 | 19358253 |
| chr13 | 19364220 | 19364758 |
| chr13 | 19365680 | 19365915 |
| chr13 | 19394229 | 19394494 |
| chr13 | 19395274 | 19395673 |
| chr13 | 19395673 | 19396086 |
| chr13 | 19396094 | 19396255 |
| chr13 | 19411897 | 19412187 |
| chr13 | 19438129 | 19438336 |
| chr13 | 19512176 | 19512672 |
| chr13 | 19517377 | 19517790 |
| chr13 | 19517996 | 19518303 |
| chr13 | 19518428 | 19518756 |
| chr13 | 19580433 | 19580818 |
| chr13 | 19591062 | 19591424 |
| chr13 | 19591450 | 19591692 |
| chr13 | 19592087 | 19592363 |
| chr13 | 19604508 | 19604851 |
| chr13 | 19618965 | 19619152 |
| chr13 | 19619207 | 19619456 |
| chr13 | 19619456 | 19619682 |
| chr13 | 19619682 | 19619978 |
| chr13 | 19622960 | 19623205 |
| chr13 | 19626518 | 19626851 |
| chr13 | 19628196 | 19628357 |
| chr13 | 19636225 | 19636445 |
| chr13 | 19644297 | 19644462 |

|       |          |          |
|-------|----------|----------|
| chr13 | 19653451 | 19653807 |
| chr13 | 19683386 | 19683576 |
| chr13 | 19689135 | 19689434 |
| chr13 | 19692534 | 19692781 |
| chr13 | 19692781 | 19693217 |
| chr13 | 19698866 | 19699055 |
| chr13 | 19703751 | 19704405 |
| chr13 | 19704790 | 19705344 |
| chr13 | 19761913 | 19762332 |
| chr13 | 19764244 | 19764803 |
| chr13 | 19824140 | 19824340 |
| chr13 | 19840265 | 19840468 |
| chr13 | 19841699 | 19841870 |
| chr13 | 19851967 | 19852155 |
| chr13 | 19854667 | 19854948 |
| chr13 | 19855044 | 19855264 |
| chr13 | 19883984 | 19884231 |
| chr13 | 19897249 | 19897615 |
| chr13 | 19918497 | 19918683 |
| chr13 | 19920972 | 19921477 |
| chr13 | 19921518 | 19921763 |
| chr13 | 19963118 | 19963393 |
| chr13 | 20048297 | 20048681 |
| chr13 | 20090155 | 20090417 |
| chr13 | 20090417 | 20090809 |
| chr13 | 20090809 | 20091270 |
| chr13 | 20091270 | 20091600 |
| chr13 | 20111311 | 20111647 |
| chr13 | 20111651 | 20111966 |
| chr13 | 20115289 | 20115620 |
| chr13 | 20115620 | 20115988 |
| chr13 | 20120769 | 20121035 |
| chr13 | 20131563 | 20132030 |
| chr13 | 20133825 | 20134227 |
| chr13 | 20136853 | 20137011 |
| chr13 | 20163164 | 20163348 |
| chr13 | 20163364 | 20164001 |
| chr13 | 20290466 | 20290967 |
| chr13 | 20292532 | 20292686 |
| chr13 | 20295668 | 20295887 |
| chr13 | 20297910 | 20298169 |
| chr13 | 20299500 | 20299726 |



|       |          |          |
|-------|----------|----------|
| chr13 | 20300179 | 20300491 |
| chr13 | 20306165 | 20306515 |
| chr13 | 20306515 | 20306824 |
| chr13 | 20311662 | 20311946 |
| chr13 | 20386602 | 20386757 |
| chr13 | 20428162 | 20428442 |
| chr13 | 20432982 | 20433197 |
| chr13 | 20433203 | 20433736 |
| chr13 | 20438735 | 20438975 |
| chr13 | 20461116 | 20461279 |
| chr13 | 20462948 | 20463222 |
| chr13 | 20471836 | 20472030 |
| chr13 | 20489782 | 20490008 |
| chr13 | 20736407 | 20736579 |
| chr13 | 21066023 | 21066274 |
| chr13 | 21158836 | 21159126 |
| chr13 | 21159185 | 21159377 |
| chr13 | 21159381 | 21159793 |
| chr13 | 21160358 | 21160508 |
| chr13 | 21160715 | 21161011 |
| chr13 | 21161050 | 21161264 |
| chr13 | 21161264 | 21161529 |
| chr13 | 21167522 | 21167739 |
| chr13 | 21167960 | 21168173 |
| chr13 | 21168714 | 21168901 |
| chr13 | 21169643 | 21169873 |
| chr13 | 21169873 | 21170136 |
| chr13 | 21170136 | 21170402 |
| chr13 | 21171654 | 21171844 |
| chr13 | 21172291 | 21172529 |
| chr13 | 21172549 | 21172997 |
| chr13 | 21173103 | 21173405 |
| chr13 | 21177755 | 21178000 |
| chr13 | 21179448 | 21179728 |
| chr13 | 21179728 | 21180016 |
| chr13 | 21180016 | 21180292 |
| chr13 | 21180292 | 21180630 |
| chr13 | 21180630 | 21181269 |
| chr13 | 21190348 | 21190508 |
| chr13 | 21198605 | 21198790 |
| chr13 | 21198943 | 21199290 |
| chr13 | 21199767 | 21200024 |

|       |          |          |
|-------|----------|----------|
| chr13 | 21200055 | 21200446 |
| chr13 | 21200446 | 21200832 |
| chr13 | 21215246 | 21215673 |
| chr13 | 21215688 | 21215873 |
| chr13 | 21221999 | 21222157 |
| chr13 | 21222163 | 21222477 |
| chr13 | 21222477 | 21222741 |
| chr13 | 21222741 | 21222995 |
| chr13 | 21223187 | 21223634 |
| chr13 | 21228573 | 21228969 |
| chr13 | 21233629 | 21234307 |
| chr13 | 21234307 | 21234676 |
| chr13 | 21240850 | 21241216 |
| chr13 | 21241634 | 21241892 |
| chr13 | 21242503 | 21242743 |
| chr13 | 21249054 | 21249439 |
| chr13 | 21250227 | 21250377 |
| chr13 | 21254052 | 21254353 |
| chr13 | 21259061 | 21259358 |
| chr13 | 21259380 | 21259558 |
| chr13 | 21259695 | 21259922 |
| chr13 | 21259922 | 21260178 |
| chr13 | 21260223 | 21260408 |
| chr13 | 21260460 | 21260640 |
| chr13 | 21268062 | 21268602 |
| chr13 | 21274949 | 21275361 |
| chr13 | 21275366 | 21275534 |
| chr13 | 21275600 | 21275789 |
| chr13 | 21275882 | 21276143 |
| chr13 | 21276188 | 21276365 |
| chr13 | 21279548 | 21280143 |
| chr13 | 21322759 | 21322933 |
| chr13 | 21325535 | 21325702 |
| chr13 | 21326229 | 21326509 |
| chr13 | 21326568 | 21326917 |
| chr13 | 21326917 | 21327265 |
| chr13 | 21327512 | 21327729 |
| chr13 | 21357665 | 21357931 |
| chr13 | 21362600 | 21363171 |
| chr13 | 21363830 | 21364036 |
| chr13 | 21369546 | 21369778 |
| chr13 | 21384957 | 21385300 |

|       |          |          |
|-------|----------|----------|
| chr13 | 21396042 | 21396382 |
| chr13 | 21401736 | 21401901 |
| chr13 | 21402308 | 21402619 |
| chr13 | 21402619 | 21402877 |
| chr13 | 21407940 | 21408229 |
| chr13 | 21408274 | 21408889 |
| chr13 | 21417389 | 21418046 |
| chr13 | 21418924 | 21419172 |
| chr13 | 21440506 | 21440899 |
| chr13 | 21440899 | 21441243 |
| chr13 | 21453404 | 21453633 |
| chr13 | 21453633 | 21453899 |
| chr13 | 21456349 | 21456727 |
| chr13 | 21468038 | 21468422 |
| chr13 | 21468422 | 21468914 |
| chr13 | 21478851 | 21479175 |
| chr13 | 21479175 | 21479613 |
| chr13 | 21479644 | 21479808 |
| chr13 | 21492787 | 21492974 |
| chr13 | 21506146 | 21506454 |
| chr13 | 21506454 | 21506736 |
| chr13 | 21508517 | 21508874 |
| chr13 | 21530731 | 21531018 |
| chr13 | 21531018 | 21531412 |
| chr13 | 21550412 | 21550725 |
| chr13 | 21550725 | 21551205 |
| chr13 | 21709963 | 21710216 |
| chr13 | 21710216 | 21710460 |
| chr13 | 21710509 | 21710766 |
| chr13 | 21710856 | 21711131 |
| chr13 | 21714897 | 21715047 |
| chr13 | 21715667 | 21715936 |
| chr13 | 21715936 | 21716233 |
| chr13 | 21716233 | 21716551 |
| chr13 | 21716551 | 21716821 |
| chr13 | 21716821 | 21717041 |
| chr13 | 21717506 | 21717789 |
| chr13 | 21717789 | 21718031 |
| chr13 | 21721408 | 21721798 |
| chr13 | 21721798 | 21722240 |
| chr13 | 21722240 | 21722591 |
| chr13 | 21733975 | 21734189 |

|       |          |          |
|-------|----------|----------|
| chr13 | 21734189 | 21734416 |
| chr13 | 21734439 | 21734629 |
| chr13 | 21734664 | 21734880 |
| chr13 | 21734882 | 21735210 |
| chr13 | 21735210 | 21735433 |
| chr13 | 21735433 | 21735767 |
| chr13 | 21750150 | 21750393 |
| chr13 | 21750393 | 21750626 |
| chr13 | 21753410 | 21753763 |
| chr13 | 21753763 | 21754081 |
| chr13 | 21754081 | 21754567 |
| chr13 | 21764431 | 21765094 |
| chr13 | 21765643 | 21765902 |
| chr13 | 21767845 | 21768009 |
| chr13 | 21779097 | 21779346 |
| chr13 | 21779346 | 21779729 |
| chr13 | 21779729 | 21780044 |
| chr13 | 21780155 | 21780514 |
| chr13 | 21780514 | 21780764 |
| chr13 | 21782349 | 21782524 |
| chr13 | 21782972 | 21783555 |
| chr13 | 21786807 | 21787222 |
| chr13 | 21787222 | 21787663 |
| chr13 | 21787663 | 21787981 |
| chr13 | 21797224 | 21797492 |
| chr13 | 21802974 | 21803430 |
| chr13 | 21808627 | 21808822 |
| chr13 | 21808970 | 21809150 |
| chr13 | 21809250 | 21809400 |
| chr13 | 21809548 | 21809753 |
| chr13 | 21809753 | 21810068 |
| chr13 | 21810068 | 21810362 |
| chr13 | 21810362 | 21810598 |
| chr13 | 21810598 | 21810878 |
| chr13 | 21811161 | 21811402 |
| chr13 | 21811609 | 21812156 |
| chr13 | 21812160 | 21812446 |
| chr13 | 21819620 | 21819897 |
| chr13 | 21819969 | 21820151 |
| chr13 | 21820176 | 21820543 |
| chr13 | 21820597 | 21820851 |
| chr13 | 21828607 | 21828794 |

|       |          |          |
|-------|----------|----------|
| chr13 | 21831494 | 21831741 |
| chr13 | 21831796 | 21832046 |
| chr13 | 21832046 | 21832345 |
| chr13 | 21832548 | 21832772 |
| chr13 | 21833064 | 21833349 |
| chr13 | 21833349 | 21833584 |
| chr13 | 21833584 | 21834210 |
| chr13 | 21834227 | 21834394 |
| chr13 | 21834542 | 21834692 |
| chr13 | 21834792 | 21834969 |
| chr13 | 21835160 | 21835315 |
| chr13 | 21840513 | 21840856 |
| chr13 | 21846415 | 21846694 |
| chr13 | 21847896 | 21848238 |
| chr13 | 21852289 | 21852550 |
| chr13 | 21855190 | 21855622 |
| chr13 | 21855653 | 21855869 |
| chr13 | 21855929 | 21856153 |
| chr13 | 21862128 | 21862511 |
| chr13 | 21881791 | 21882208 |
| chr13 | 21882294 | 21882621 |
| chr13 | 21882803 | 21883075 |
| chr13 | 21883075 | 21883323 |
| chr13 | 21892498 | 21892734 |
| chr13 | 21892839 | 21893196 |
| chr13 | 21893930 | 21894269 |
| chr13 | 21896836 | 21897226 |
| chr13 | 21897226 | 21897525 |
| chr13 | 21907054 | 21907291 |
| chr13 | 21907335 | 21907522 |
| chr13 | 21907574 | 21907752 |
| chr13 | 21907773 | 21908110 |
| chr13 | 21911253 | 21911467 |
| chr13 | 21913830 | 21914191 |
| chr13 | 21914581 | 21914764 |
| chr13 | 21914764 | 21914961 |
| chr13 | 21917069 | 21917287 |
| chr13 | 21918805 | 21919118 |
| chr13 | 21919118 | 21919690 |
| chr13 | 21919839 | 21920134 |
| chr13 | 21920134 | 21920350 |
| chr13 | 21924706 | 21925100 |

|       |          |          |
|-------|----------|----------|
| chr13 | 21927690 | 21928215 |
| chr13 | 21928619 | 21928877 |
| chr13 | 21931068 | 21931282 |
| chr13 | 21933928 | 21934094 |
| chr13 | 21935423 | 21935658 |
| chr13 | 21935882 | 21936144 |
| chr13 | 21936951 | 21937435 |
| chr13 | 21940257 | 21940644 |
| chr13 | 21940793 | 21941038 |
| chr13 | 21944688 | 21944967 |
| chr13 | 21944967 | 21945414 |
| chr13 | 21945414 | 21945895 |
| chr13 | 21959324 | 21959474 |
| chr13 | 21973999 | 21974185 |
| chr13 | 21974185 | 21974443 |
| chr13 | 21974443 | 21974693 |
| chr13 | 21974735 | 21974966 |
| chr13 | 21974966 | 21975377 |
| chr13 | 21975494 | 21975761 |
| chr13 | 21981277 | 21981551 |
| chr13 | 21981551 | 21981859 |
| chr13 | 21993953 | 21994346 |
| chr13 | 21995405 | 21995994 |
| chr13 | 21996117 | 21996271 |
| chr13 | 21996271 | 21996423 |
| chr13 | 21996550 | 21996788 |
| chr13 | 21996868 | 21997221 |
| chr13 | 22005878 | 22006283 |
| chr13 | 22006283 | 22006610 |
| chr13 | 22006610 | 22006875 |
| chr13 | 22006875 | 22007253 |
| chr13 | 22015607 | 22016137 |
| chr13 | 22020548 | 22020758 |
| chr13 | 22020824 | 22021060 |
| chr13 | 22021060 | 22021297 |
| chr13 | 22021589 | 22021755 |
| chr13 | 22021768 | 22021996 |
| chr13 | 22021996 | 22022275 |
| chr13 | 22022275 | 22022668 |
| chr13 | 22026472 | 22026641 |
| chr13 | 22027936 | 22028130 |
| chr13 | 22028685 | 22029058 |

|       |          |          |
|-------|----------|----------|
| chr13 | 22029155 | 22029381 |
| chr13 | 22033383 | 22033625 |
| chr13 | 22035123 | 22035398 |
| chr13 | 22035398 | 22035615 |
| chr13 | 22035615 | 22036310 |
| chr13 | 22040953 | 22041529 |
| chr13 | 22042510 | 22042732 |
| chr13 | 22042732 | 22042872 |
| chr13 | 22042872 | 22043098 |
| chr13 | 22043098 | 22043693 |
| chr13 | 22049696 | 22050023 |
| chr13 | 22050440 | 22050916 |
| chr13 | 22050916 | 22051233 |
| chr13 | 22051233 | 22051496 |
| chr13 | 22272429 | 22272638 |
| chr13 | 22277226 | 22277442 |
| chr13 | 22342035 | 22342229 |
| chr13 | 22347547 | 22347823 |
| chr13 | 22397689 | 22397879 |
| chr13 | 22404228 | 22404513 |
| chr13 | 22413494 | 22413729 |
| chr13 | 22415981 | 22416614 |
| chr13 | 22418979 | 22419591 |
| chr13 | 22498779 | 22498991 |
| chr13 | 22573144 | 22573472 |
| chr13 | 22608935 | 22609285 |
| chr13 | 22650256 | 22650406 |
| chr13 | 22714145 | 22714482 |
| chr13 | 22747658 | 22747808 |
| chr13 | 22747993 | 22748172 |
| chr13 | 22793959 | 22794330 |
| chr13 | 22830329 | 22830505 |
| chr13 | 22830852 | 22831374 |
| chr13 | 22831374 | 22831708 |
| chr13 | 22837532 | 22837703 |
| chr13 | 22861103 | 22861352 |
| chr13 | 22871767 | 22871981 |
| chr13 | 22896917 | 22897078 |
| chr13 | 22898502 | 22898941 |
| chr13 | 22898951 | 22899213 |
| chr13 | 22914364 | 22914637 |
| chr13 | 22914840 | 22914991 |

|       |          |          |
|-------|----------|----------|
| chr13 | 22938386 | 22938563 |
| chr13 | 22939976 | 22940416 |
| chr13 | 22940428 | 22940693 |
| chr13 | 22978423 | 22978686 |
| chr13 | 22992328 | 22992738 |
| chr13 | 23087525 | 23087877 |
| chr13 | 23157170 | 23157392 |
| chr13 | 23157750 | 23158228 |
| chr13 | 23177076 | 23177226 |
| chr13 | 23234345 | 23234560 |
| chr13 | 23258475 | 23259083 |
| chr13 | 23260606 | 23260875 |
| chr13 | 23267365 | 23267535 |
| chr13 | 23269118 | 23269333 |
| chr13 | 23270402 | 23270654 |
| chr13 | 23285081 | 23285567 |
| chr13 | 23285567 | 23285912 |
| chr13 | 23285919 | 23286169 |
| chr13 | 23286169 | 23286410 |
| chr13 | 23286506 | 23286675 |
| chr13 | 23286675 | 23286778 |
| chr13 | 23286847 | 23287001 |
| chr13 | 23287001 | 23287141 |
| chr13 | 23298438 | 23298899 |
| chr13 | 23298899 | 23299341 |
| chr13 | 23299341 | 23299694 |
| chr13 | 23299694 | 23299979 |
| chr13 | 23299979 | 23300238 |
| chr13 | 23307043 | 23307251 |
| chr13 | 23307276 | 23307518 |
| chr13 | 23307518 | 23307926 |
| chr13 | 23308133 | 23308336 |
| chr13 | 23308413 | 23308579 |
| chr13 | 23308608 | 23308909 |
| chr13 | 23308909 | 23309192 |
| chr13 | 23309293 | 23309819 |
| chr13 | 23315585 | 23315865 |
| chr13 | 23317387 | 23317615 |
| chr13 | 23317615 | 23317902 |
| chr13 | 23324694 | 23324849 |
| chr13 | 23329812 | 23330109 |
| chr13 | 23365633 | 23365843 |



|       |          |          |
|-------|----------|----------|
| chr13 | 23368599 | 23368998 |
| chr13 | 23368998 | 23369454 |
| chr13 | 23369478 | 23369641 |
| chr13 | 23375708 | 23375882 |
| chr13 | 23395830 | 23395994 |
| chr13 | 23396037 | 23396208 |
| chr13 | 23396304 | 23396678 |
| chr13 | 23396678 | 23396885 |
| chr13 | 23397007 | 23397267 |
| chr13 | 23400726 | 23400949 |
| chr13 | 23401014 | 23401170 |
| chr13 | 23401289 | 23401493 |
| chr13 | 23401660 | 23401880 |
| chr13 | 23401880 | 23402104 |
| chr13 | 23402104 | 23402357 |
| chr13 | 23402719 | 23402929 |
| chr13 | 23411690 | 23411935 |
| chr13 | 23411935 | 23412266 |
| chr13 | 23412266 | 23412567 |
| chr13 | 23412567 | 23412822 |
| chr13 | 23412822 | 23413163 |
| chr13 | 23413202 | 23413401 |
| chr13 | 23414088 | 23414526 |
| chr13 | 23423553 | 23423708 |
| chr13 | 23423767 | 23424146 |
| chr13 | 23424494 | 23424875 |
| chr13 | 23425504 | 23425813 |
| chr13 | 23426460 | 23426696 |
| chr13 | 23426925 | 23427228 |
| chr13 | 23430713 | 23431132 |
| chr13 | 23431327 | 23431817 |
| chr13 | 23432530 | 23432905 |
| chr13 | 23432927 | 23433214 |
| chr13 | 23436957 | 23437109 |
| chr13 | 23437498 | 23437678 |
| chr13 | 23437678 | 23437900 |
| chr13 | 23437930 | 23438319 |
| chr13 | 23438652 | 23438825 |
| chr13 | 23445515 | 23445799 |
| chr13 | 23445799 | 23446079 |
| chr13 | 23446079 | 23446362 |
| chr13 | 23446437 | 23446669 |

|       |          |          |
|-------|----------|----------|
| chr13 | 23446712 | 23446950 |
| chr13 | 23449277 | 23449487 |
| chr13 | 23450568 | 23450800 |
| chr13 | 23453361 | 23453628 |
| chr13 | 23453628 | 23453923 |
| chr13 | 23463402 | 23463760 |
| chr13 | 23464016 | 23464199 |
| chr13 | 23464222 | 23464512 |
| chr13 | 23465585 | 23465739 |
| chr13 | 23465772 | 23466240 |
| chr13 | 23466321 | 23466655 |
| chr13 | 23466929 | 23467248 |
| chr13 | 23469085 | 23469467 |
| chr13 | 23479073 | 23479525 |
| chr13 | 23488374 | 23488519 |
| chr13 | 23488519 | 23488667 |
| chr13 | 23488727 | 23489020 |
| chr13 | 23489020 | 23489233 |
| chr13 | 23495650 | 23495847 |
| chr13 | 23497787 | 23497946 |
| chr13 | 23497963 | 23498288 |
| chr13 | 23500030 | 23500221 |
| chr13 | 23500237 | 23500387 |
| chr13 | 23500462 | 23500732 |
| chr13 | 23500830 | 23501172 |
| chr13 | 23503911 | 23504115 |
| chr13 | 23505996 | 23506269 |
| chr13 | 23506443 | 23506668 |
| chr13 | 23507112 | 23507362 |
| chr13 | 23510234 | 23510436 |
| chr13 | 23517141 | 23517343 |
| chr13 | 23517445 | 23517936 |
| chr13 | 23517936 | 23518327 |
| chr13 | 23518953 | 23519243 |
| chr13 | 23519526 | 23519789 |
| chr13 | 23521808 | 23522054 |
| chr13 | 23524683 | 23524975 |
| chr13 | 23526451 | 23526662 |
| chr13 | 23530311 | 23530461 |
| chr13 | 23530867 | 23531246 |
| chr13 | 23531246 | 23531524 |
| chr13 | 23531603 | 23531896 |

|       |          |          |
|-------|----------|----------|
| chr13 | 23533664 | 23534011 |
| chr13 | 23534011 | 23534311 |
| chr13 | 23535118 | 23535473 |
| chr13 | 23535473 | 23535836 |
| chr13 | 23542913 | 23543171 |
| chr13 | 23543171 | 23543389 |
| chr13 | 23543389 | 23543680 |
| chr13 | 23544210 | 23544604 |
| chr13 | 23544604 | 23544987 |
| chr13 | 23551273 | 23551577 |
| chr13 | 23551577 | 23551931 |
| chr13 | 23554893 | 23555152 |
| chr13 | 23555152 | 23555486 |
| chr13 | 23555486 | 23555941 |
| chr13 | 23555941 | 23556382 |
| chr13 | 23561716 | 23562202 |
| chr13 | 23562202 | 23562448 |
| chr13 | 23562448 | 23562736 |
| chr13 | 23563136 | 23563479 |
| chr13 | 23570701 | 23571062 |
| chr13 | 23571062 | 23571389 |
| chr13 | 23571389 | 23571910 |
| chr13 | 23573937 | 23574513 |
| chr13 | 23574513 | 23574878 |
| chr13 | 23575624 | 23575877 |
| chr13 | 23575877 | 23576155 |
| chr13 | 23581346 | 23581848 |
| chr13 | 23581848 | 23582173 |
| chr13 | 23584984 | 23585221 |
| chr13 | 23585484 | 23585773 |
| chr13 | 23585773 | 23586174 |
| chr13 | 23598020 | 23598290 |
| chr13 | 23609233 | 23609539 |
| chr13 | 23610853 | 23611106 |
| chr13 | 23611106 | 23611389 |
| chr13 | 23620723 | 23621021 |
| chr13 | 23621021 | 23621461 |
| chr13 | 23621461 | 23621893 |
| chr13 | 23622035 | 23622427 |
| chr13 | 23622427 | 23622717 |
| chr13 | 23630730 | 23630995 |
| chr13 | 23659588 | 23659898 |

|       |          |          |
|-------|----------|----------|
| chr13 | 23660005 | 23660337 |
| chr13 | 23665154 | 23665338 |
| chr13 | 23682191 | 23682457 |
| chr13 | 23683499 | 23683800 |
| chr13 | 23683800 | 23684068 |
| chr13 | 23684068 | 23684360 |
| chr13 | 23684360 | 23684699 |
| chr13 | 23691929 | 23692257 |
| chr13 | 23697466 | 23697699 |
| chr13 | 23697699 | 23697905 |
| chr13 | 23697905 | 23698127 |
| chr13 | 23698127 | 23698321 |
| chr13 | 23698321 | 23698718 |
| chr13 | 23700871 | 23701085 |
| chr13 | 23701205 | 23701497 |
| chr13 | 23708278 | 23708428 |
| chr13 | 23710149 | 23710341 |
| chr13 | 23710341 | 23710548 |
| chr13 | 23710548 | 23710768 |
| chr13 | 23710768 | 23710975 |
| chr13 | 23712910 | 23713084 |
| chr13 | 23730475 | 23730897 |
| chr13 | 23732289 | 23732439 |
| chr13 | 23732567 | 23732759 |
| chr13 | 23738659 | 23738912 |
| chr13 | 23738912 | 23739363 |
| chr13 | 23739363 | 23740166 |
| chr13 | 23745109 | 23745526 |
| chr13 | 23745526 | 23745729 |
| chr13 | 23746139 | 23746420 |
| chr13 | 23746420 | 23746709 |
| chr13 | 23746709 | 23747194 |
| chr13 | 23749623 | 23750062 |
| chr13 | 23750946 | 23751311 |
| chr13 | 23751311 | 23751562 |
| chr13 | 23752104 | 23752476 |
| chr13 | 23752476 | 23752778 |
| chr13 | 23756785 | 23757053 |
| chr13 | 23757053 | 23757392 |
| chr13 | 23757394 | 23757555 |
| chr13 | 23760797 | 23761049 |
| chr13 | 23761049 | 23761313 |

|       |          |          |
|-------|----------|----------|
| chr13 | 23761313 | 23761555 |
| chr13 | 23761555 | 23761781 |
| chr13 | 23761877 | 23762239 |
| chr13 | 23762239 | 23762564 |
| chr13 | 23763543 | 23763695 |
| chr13 | 23792569 | 23792789 |
| chr13 | 23800274 | 23800591 |
| chr13 | 23819014 | 23819164 |
| chr13 | 23819958 | 23820371 |
| chr13 | 23820371 | 23820728 |
| chr13 | 23833196 | 23833346 |
| chr13 | 23885619 | 23885798 |
| chr13 | 23913821 | 23914230 |
| chr13 | 23926365 | 23926561 |
| chr13 | 23928734 | 23928986 |
| chr13 | 23931029 | 23931231 |
| chr13 | 23933712 | 23934001 |
| chr13 | 23942944 | 23943164 |
| chr13 | 23950917 | 23951174 |
| chr13 | 23990908 | 23991175 |
| chr13 | 24018528 | 24018850 |
| chr13 | 24053530 | 24053777 |
| chr13 | 24058291 | 24058529 |
| chr13 | 24065592 | 24065888 |
| chr13 | 24095762 | 24096045 |
| chr13 | 24096045 | 24096363 |
| chr13 | 24096639 | 24097013 |
| chr13 | 24103995 | 24104372 |
| chr13 | 24104690 | 24104916 |
| chr13 | 24104920 | 24105328 |
| chr13 | 24105328 | 24105745 |
| chr13 | 24108322 | 24108576 |
| chr13 | 24110224 | 24110447 |
| chr13 | 24112760 | 24113004 |
| chr13 | 24113004 | 24113337 |
| chr13 | 24114061 | 24114213 |
| chr13 | 24135359 | 24135559 |
| chr13 | 24155915 | 24156071 |
| chr13 | 24169727 | 24169898 |
| chr13 | 24198511 | 24198771 |
| chr13 | 24247603 | 24247792 |
| chr13 | 24254129 | 24254386 |

|       |          |          |
|-------|----------|----------|
| chr13 | 24261021 | 24261346 |
| chr13 | 24261346 | 24261581 |
| chr13 | 24269248 | 24269434 |
| chr13 | 24272835 | 24273063 |
| chr13 | 24273063 | 24273275 |
| chr13 | 24279948 | 24280181 |
| chr13 | 24280181 | 24280403 |
| chr13 | 24280418 | 24280615 |
| chr13 | 24280849 | 24281190 |
| chr13 | 24281190 | 24281506 |
| chr13 | 24297386 | 24297555 |
| chr13 | 24316598 | 24316936 |
| chr13 | 24318717 | 24318868 |
| chr13 | 24322336 | 24322708 |
| chr13 | 24332530 | 24332884 |
| chr13 | 24337947 | 24338163 |
| chr13 | 24370047 | 24370216 |
| chr13 | 24374777 | 24374951 |
| chr13 | 24375032 | 24375293 |
| chr13 | 24375350 | 24375671 |
| chr13 | 24375671 | 24375892 |
| chr13 | 24416507 | 24416752 |
| chr13 | 24453859 | 24454110 |
| chr13 | 24481950 | 24482191 |
| chr13 | 24487654 | 24487814 |
| chr13 | 24499641 | 24499791 |
| chr13 | 24514891 | 24515180 |
| chr13 | 24518951 | 24519236 |
| chr13 | 24521441 | 24521767 |
| chr13 | 24522356 | 24522774 |
| chr13 | 24522922 | 24523079 |
| chr13 | 24526991 | 24527241 |
| chr13 | 24536642 | 24537194 |
| chr13 | 24537317 | 24537500 |
| chr13 | 24538696 | 24538992 |
| chr13 | 24538992 | 24539315 |
| chr13 | 24547445 | 24547635 |
| chr13 | 24548396 | 24548665 |
| chr13 | 24548981 | 24549236 |
| chr13 | 24553197 | 24553737 |
| chr13 | 24564781 | 24564990 |
| chr13 | 24565167 | 24565455 |

|       |          |          |
|-------|----------|----------|
| chr13 | 24565455 | 24565862 |
| chr13 | 24565862 | 24566428 |
| chr13 | 24576470 | 24576702 |
| chr13 | 24576787 | 24576940 |
| chr13 | 24580871 | 24581030 |
| chr13 | 24584443 | 24584640 |
| chr13 | 24601736 | 24601943 |
| chr13 | 24604192 | 24604349 |
| chr13 | 24623708 | 24623912 |
| chr13 | 24638354 | 24638782 |
| chr13 | 24638782 | 24639126 |
| chr13 | 24639126 | 24639452 |
| chr13 | 24642904 | 24643180 |
| chr13 | 24646271 | 24646810 |
| chr13 | 24668600 | 24668855 |
| chr13 | 24674022 | 24674362 |
| chr13 | 24674362 | 24674778 |
| chr13 | 24678745 | 24679023 |
| chr13 | 24681471 | 24681804 |
| chr13 | 24681804 | 24682070 |
| chr13 | 24687385 | 24687653 |
| chr13 | 24713488 | 24713954 |
| chr13 | 24721613 | 24721815 |
| chr13 | 24724463 | 24724636 |
| chr13 | 24726151 | 24726331 |
| chr13 | 24735585 | 24736291 |
| chr13 | 24750813 | 24751118 |
| chr13 | 24751334 | 24751837 |
| chr13 | 24761174 | 24761751 |
| chr13 | 24761751 | 24762147 |
| chr13 | 24768494 | 24768828 |
| chr13 | 24771650 | 24772047 |
| chr13 | 24776225 | 24776492 |
| chr13 | 24776492 | 24776708 |
| chr13 | 24776708 | 24776857 |
| chr13 | 24781947 | 24782253 |
| chr13 | 24782253 | 24782471 |
| chr13 | 24786042 | 24786581 |
| chr13 | 24791993 | 24792444 |
| chr13 | 24792444 | 24792742 |
| chr13 | 24792742 | 24793117 |
| chr13 | 24799487 | 24799646 |

|       |          |          |
|-------|----------|----------|
| chr13 | 24799932 | 24800331 |
| chr13 | 24800606 | 24800930 |
| chr13 | 24801040 | 24801376 |
| chr13 | 24801376 | 24801675 |
| chr13 | 24801675 | 24801914 |
| chr13 | 24802417 | 24802615 |
| chr13 | 24814896 | 24815082 |
| chr13 | 24816263 | 24816665 |
| chr13 | 24816665 | 24817023 |
| chr13 | 24817023 | 24817428 |
| chr13 | 24825457 | 24826074 |
| chr13 | 24826074 | 24826511 |
| chr13 | 24829080 | 24829300 |
| chr13 | 24831305 | 24831796 |
| chr13 | 24831796 | 24832362 |
| chr13 | 24844907 | 24845378 |
| chr13 | 24849406 | 24849761 |
| chr13 | 24850103 | 24850339 |
| chr13 | 24854453 | 24854768 |
| chr13 | 24904029 | 24904236 |
| chr13 | 24914744 | 24915159 |
| chr13 | 24915159 | 24915406 |
| chr13 | 24920377 | 24920694 |
| chr13 | 24920707 | 24920869 |
| chr13 | 24936997 | 24937620 |
| chr13 | 24937620 | 24937842 |
| chr13 | 24937842 | 24938065 |
| chr13 | 24938065 | 24938266 |
| chr13 | 24938686 | 24939043 |
| chr13 | 24948787 | 24949209 |
| chr13 | 24949209 | 24949474 |
| chr13 | 24949474 | 24949719 |
| chr13 | 24952993 | 24953226 |
| chr13 | 24955183 | 24955333 |
| chr13 | 24955518 | 24955997 |
| chr13 | 24964359 | 24964581 |
| chr13 | 24965270 | 24965467 |
| chr13 | 24965520 | 24965833 |
| chr13 | 24965865 | 24966017 |
| chr13 | 24971903 | 24972100 |
| chr13 | 24977601 | 24977772 |
| chr13 | 24977889 | 24978366 |



|       |          |          |
|-------|----------|----------|
| chr13 | 24988465 | 24988737 |
| chr13 | 25003081 | 25003291 |
| chr13 | 25007303 | 25007703 |
| chr13 | 25007703 | 25008102 |
| chr13 | 25015170 | 25015628 |
| chr13 | 25019890 | 25020230 |
| chr13 | 25020230 | 25020539 |
| chr13 | 25050340 | 25050738 |
| chr13 | 25055087 | 25055340 |
| chr13 | 25055340 | 25055590 |
| chr13 | 25055819 | 25056049 |
| chr13 | 25056049 | 25056363 |
| chr13 | 25064377 | 25064562 |
| chr13 | 25069933 | 25070260 |
| chr13 | 25070612 | 25070767 |
| chr13 | 25070827 | 25071209 |
| chr13 | 25071248 | 25071398 |
| chr13 | 25085159 | 25085581 |
| chr13 | 25105421 | 25105868 |
| chr13 | 25105868 | 25106260 |
| chr13 | 25115648 | 25115972 |
| chr13 | 25116056 | 25116261 |
| chr13 | 25131197 | 25131363 |
| chr13 | 25159693 | 25159953 |
| chr13 | 25160042 | 25160199 |
| chr13 | 25192839 | 25193224 |
| chr13 | 25193224 | 25193609 |
| chr13 | 25205998 | 25206307 |
| chr13 | 25208188 | 25208526 |
| chr13 | 25264817 | 25264987 |
| chr13 | 25265286 | 25265522 |
| chr13 | 25269121 | 25269355 |
| chr13 | 25269898 | 25270215 |
| chr13 | 25309647 | 25309996 |
| chr13 | 25310036 | 25310414 |
| chr13 | 25311013 | 25311389 |
| chr13 | 25311524 | 25311773 |
| chr13 | 25312130 | 25312535 |
| chr13 | 25314697 | 25314898 |
| chr13 | 25337498 | 25337924 |
| chr13 | 25341918 | 25342220 |
| chr13 | 25350811 | 25351023 |

|       |          |          |
|-------|----------|----------|
| chr13 | 25357652 | 25357857 |
| chr13 | 25369850 | 25370014 |
| chr13 | 25370514 | 25370720 |
| chr13 | 25388290 | 25388593 |
| chr13 | 25453135 | 25453319 |
| chr13 | 25456270 | 25456517 |
| chr13 | 25470749 | 25471067 |
| chr13 | 25475526 | 25475942 |
| chr13 | 25475942 | 25476293 |
| chr13 | 25562756 | 25562982 |
| chr13 | 25639958 | 25640221 |
| chr13 | 25677838 | 25678058 |
| chr13 | 25785200 | 25785384 |
| chr13 | 25785556 | 25786050 |
| chr13 | 25808936 | 25809129 |
| chr13 | 25834087 | 25834328 |
| chr13 | 25834361 | 25834519 |
| chr13 | 25837531 | 25837976 |
| chr13 | 25844593 | 25844832 |
| chr13 | 25909234 | 25909422 |
| chr13 | 25932905 | 25933064 |
| chr13 | 25955421 | 25955736 |
| chr13 | 25958632 | 25958962 |
| chr13 | 26009227 | 26009477 |
| chr13 | 26088835 | 26088987 |
| chr13 | 26216643 | 26216862 |
| chr13 | 26217343 | 26217686 |
| chr13 | 26217698 | 26217851 |
| chr13 | 26218345 | 26218712 |
| chr13 | 26237520 | 26237732 |
| chr13 | 26274347 | 26274522 |
| chr13 | 26338826 | 26339106 |
| chr13 | 26354484 | 26354747 |
| chr13 | 26387919 | 26388140 |
| chr13 | 26412536 | 26412745 |
| chr13 | 26412823 | 26413039 |
| chr13 | 26457889 | 26458282 |
| chr13 | 26640791 | 26641055 |
| chr13 | 26693054 | 26693276 |
| chr13 | 26694242 | 26694413 |
| chr13 | 26930967 | 26931478 |
| chr13 | 26939798 | 26940158 |

|       |          |          |
|-------|----------|----------|
| chr13 | 26940170 | 26940454 |
| chr13 | 26940454 | 26940857 |
| chr13 | 26953689 | 26954211 |
| chr13 | 26976053 | 26976656 |
| chr13 | 26980511 | 26980839 |
| chr13 | 26980839 | 26981116 |
| chr13 | 26997803 | 26998046 |
| chr13 | 27022118 | 27022316 |
| chr13 | 27026024 | 27026227 |
| chr13 | 27026687 | 27027006 |
| chr13 | 27027257 | 27027587 |
| chr13 | 27027587 | 27027890 |
| chr13 | 27028598 | 27028822 |
| chr13 | 27028970 | 27029205 |
| chr13 | 27030020 | 27030237 |
| chr13 | 27033029 | 27033388 |
| chr13 | 27046108 | 27046687 |
| chr13 | 27057927 | 27058201 |
| chr13 | 27059223 | 27059597 |
| chr13 | 27080320 | 27080900 |
| chr13 | 27080955 | 27081350 |
| chr13 | 27083122 | 27083288 |
| chr13 | 27113165 | 27113702 |
| chr13 | 27113752 | 27114232 |
| chr13 | 27146511 | 27146736 |
| chr13 | 27148272 | 27148781 |
| chr13 | 27148871 | 27149355 |
| chr13 | 27281950 | 27282204 |
| chr13 | 27312467 | 27312721 |
| chr13 | 27386132 | 27386407 |
| chr13 | 27403821 | 27404009 |
| chr13 | 27497705 | 27498009 |
| chr13 | 27553355 | 27553773 |
| chr13 | 27660484 | 27660795 |
| chr13 | 27660795 | 27661087 |
| chr13 | 27706445 | 27707028 |
| chr13 | 27724783 | 27725479 |
| chr13 | 27725483 | 27725648 |
| chr13 | 27730237 | 27730650 |
| chr13 | 27730650 | 27730984 |
| chr13 | 27734546 | 27734953 |
| chr13 | 27771059 | 27771301 |

|       |          |          |
|-------|----------|----------|
| chr13 | 27798870 | 27799112 |
| chr13 | 27799171 | 27799741 |
| chr13 | 27815476 | 27815723 |
| chr13 | 27816632 | 27816881 |
| chr13 | 27822755 | 27823393 |
| chr13 | 27837768 | 27838079 |
| chr13 | 27838643 | 27838805 |
| chr13 | 27842236 | 27842532 |
| chr13 | 27847800 | 27847973 |
| chr13 | 27904325 | 27904476 |
| chr13 | 27921836 | 27921991 |
| chr13 | 27923660 | 27923824 |
| chr13 | 27976853 | 27977088 |
| chr13 | 27996498 | 27996971 |
| chr13 | 28068988 | 28069812 |
| chr13 | 28109435 | 28109611 |
| chr13 | 28110886 | 28111268 |
| chr13 | 28132649 | 28133390 |
| chr13 | 28289068 | 28289218 |
| chr13 | 28297584 | 28297938 |
| chr13 | 28310154 | 28310364 |
| chr13 | 28311162 | 28311501 |
| chr13 | 28312107 | 28312414 |
| chr13 | 28312479 | 28312632 |
| chr13 | 28313498 | 28313842 |
| chr13 | 28391458 | 28391812 |
| chr13 | 28408229 | 28408428 |
| chr13 | 28417444 | 28417594 |
| chr13 | 28417600 | 28417880 |
| chr13 | 28417880 | 28418188 |
| chr13 | 28418188 | 28418571 |
| chr13 | 28424670 | 28424833 |
| chr13 | 28457367 | 28457865 |
| chr13 | 28458062 | 28458260 |
| chr13 | 28492085 | 28492390 |
| chr13 | 28519060 | 28519512 |
| chr13 | 28524395 | 28524891 |
| chr13 | 28526382 | 28526655 |
| chr13 | 28532138 | 28532760 |
| chr13 | 28533189 | 28533406 |
| chr13 | 28544050 | 28544370 |
| chr13 | 28544412 | 28545018 |

|       |          |          |
|-------|----------|----------|
| chr13 | 28545416 | 28545660 |
| chr13 | 28563651 | 28563804 |
| chr13 | 28565970 | 28566473 |
| chr13 | 28589094 | 28589349 |
| chr13 | 28592258 | 28592468 |
| chr13 | 28600827 | 28600977 |
| chr13 | 28605943 | 28606101 |
| chr13 | 28607633 | 28607851 |
| chr13 | 28607885 | 28608053 |
| chr13 | 28617445 | 28617806 |
| chr13 | 28626653 | 28626911 |
| chr13 | 28629468 | 28629698 |
| chr13 | 28633091 | 28633499 |
| chr13 | 28633499 | 28634019 |
| chr13 | 28646003 | 28646304 |
| chr13 | 28651873 | 28652115 |
| chr13 | 28652455 | 28652688 |
| chr13 | 28652688 | 28652971 |
| chr13 | 28654964 | 28655196 |
| chr13 | 28655777 | 28655988 |
| chr13 | 28659675 | 28659992 |
| chr13 | 28680140 | 28680828 |
| chr13 | 28685608 | 28686054 |
| chr13 | 28690989 | 28691163 |
| chr13 | 28692585 | 28692987 |
| chr13 | 28693283 | 28693433 |
| chr13 | 28699746 | 28700036 |
| chr13 | 28718604 | 28719230 |
| chr13 | 28730195 | 28730570 |
| chr13 | 28731717 | 28731872 |
| chr13 | 28737276 | 28737640 |
| chr13 | 28737810 | 28738125 |
| chr13 | 28738125 | 28738597 |
| chr13 | 28738597 | 28739111 |
| chr13 | 28739111 | 28739486 |
| chr13 | 28749712 | 28750194 |
| chr13 | 28750861 | 28751353 |
| chr13 | 28757774 | 28758082 |
| chr13 | 28758082 | 28758390 |
| chr13 | 28758390 | 28758637 |
| chr13 | 28758637 | 28758841 |
| chr13 | 28758878 | 28759072 |

|       |          |          |
|-------|----------|----------|
| chr13 | 28759072 | 28759332 |
| chr13 | 28765134 | 28765408 |
| chr13 | 28823430 | 28823881 |
| chr13 | 28824144 | 28824294 |
| chr13 | 28830295 | 28830611 |
| chr13 | 28832796 | 28833222 |
| chr13 | 28833411 | 28833601 |
| chr13 | 28835876 | 28836039 |
| chr13 | 28839196 | 28839390 |
| chr13 | 28842813 | 28843230 |
| chr13 | 28843497 | 28843701 |
| chr13 | 28850644 | 28850947 |
| chr13 | 28850947 | 28851214 |
| chr13 | 28854202 | 28854764 |
| chr13 | 28869195 | 28869395 |
| chr13 | 28873905 | 28874373 |
| chr13 | 28874373 | 28874730 |
| chr13 | 28881042 | 28881399 |
| chr13 | 28883546 | 28883696 |
| chr13 | 28883741 | 28884022 |
| chr13 | 28884163 | 28884413 |
| chr13 | 28884413 | 28884638 |
| chr13 | 28885050 | 28885301 |
| chr13 | 28885301 | 28885550 |
| chr13 | 28885550 | 28885808 |
| chr13 | 28892980 | 28893250 |
| chr13 | 28896825 | 28897117 |
| chr13 | 28915347 | 28915560 |
| chr13 | 28916947 | 28917368 |
| chr13 | 28917368 | 28917812 |
| chr13 | 28917812 | 28918272 |
| chr13 | 28923227 | 28923467 |
| chr13 | 28924179 | 28924491 |
| chr13 | 28930632 | 28930790 |
| chr13 | 28931230 | 28931761 |
| chr13 | 28931814 | 28932175 |
| chr13 | 28938843 | 28939052 |
| chr13 | 28945823 | 28946009 |
| chr13 | 28946625 | 28946812 |
| chr13 | 28946905 | 28947055 |
| chr13 | 28948057 | 28948408 |
| chr13 | 28948601 | 28948815 |

|       |          |          |
|-------|----------|----------|
| chr13 | 28950811 | 28950962 |
| chr13 | 28952239 | 28952538 |
| chr13 | 28952582 | 28953013 |
| chr13 | 28953013 | 28953262 |
| chr13 | 28953262 | 28953573 |
| chr13 | 28953573 | 28954054 |
| chr13 | 28957834 | 28958128 |
| chr13 | 28958191 | 28958722 |
| chr13 | 28958722 | 28959068 |
| chr13 | 28959503 | 28959934 |
| chr13 | 29014466 | 29014876 |
| chr13 | 29057293 | 29057543 |
| chr13 | 29148690 | 29149004 |
| chr13 | 29163161 | 29163404 |
| chr13 | 29193912 | 29194171 |
| chr13 | 29196840 | 29197268 |
| chr13 | 29201999 | 29202492 |
| chr13 | 29202492 | 29203209 |
| chr13 | 29210504 | 29210788 |
| chr13 | 29210788 | 29211068 |
| chr13 | 29218409 | 29219190 |
| chr13 | 29477549 | 29477699 |
| chr13 | 29502706 | 29503171 |
| chr13 | 29503493 | 29503968 |
| chr13 | 29504868 | 29505237 |
| chr13 | 29505237 | 29505634 |
| chr13 | 29505730 | 29505880 |
| chr13 | 29574743 | 29575183 |
| chr13 | 29597317 | 29597603 |
| chr13 | 29601126 | 29601304 |
| chr13 | 29604331 | 29604562 |
| chr13 | 29606174 | 29606340 |
| chr13 | 29625080 | 29625230 |
| chr13 | 29627453 | 29627676 |
| chr13 | 29635025 | 29635182 |
| chr13 | 29640037 | 29640611 |
| chr13 | 29641263 | 29641507 |
| chr13 | 29663599 | 29663754 |
| chr13 | 29701485 | 29701733 |
| chr13 | 29710665 | 29710902 |
| chr13 | 29710902 | 29711090 |
| chr13 | 29738086 | 29738288 |

|       |          |          |
|-------|----------|----------|
| chr13 | 29738300 | 29738458 |
| chr13 | 29750161 | 29750591 |
| chr13 | 29750591 | 29751156 |
| chr13 | 29777285 | 29777530 |
| chr13 | 29778222 | 29778471 |
| chr13 | 29779191 | 29779463 |
| chr13 | 29780623 | 29780928 |
| chr13 | 29780928 | 29781185 |
| chr13 | 29781209 | 29781362 |
| chr13 | 29792147 | 29792432 |
| chr13 | 29805334 | 29805659 |
| chr13 | 29817071 | 29817373 |
| chr13 | 29830733 | 29831028 |
| chr13 | 29831057 | 29831563 |
| chr13 | 29831908 | 29832068 |
| chr13 | 29837918 | 29838246 |
| chr13 | 29838743 | 29838975 |
| chr13 | 29855178 | 29855502 |
| chr13 | 29855502 | 29855764 |
| chr13 | 29857419 | 29857741 |
| chr13 | 29857796 | 29857950 |
| chr13 | 29870707 | 29870926 |
| chr13 | 29878165 | 29878316 |
| chr13 | 29901720 | 29901972 |
| chr13 | 29903192 | 29903806 |
| chr13 | 29915543 | 29915709 |
| chr13 | 29921869 | 29922020 |
| chr13 | 29938859 | 29939070 |
| chr13 | 29949108 | 29949259 |
| chr13 | 29973703 | 29973923 |
| chr13 | 29984138 | 29984685 |
| chr13 | 29984685 | 29985084 |
| chr13 | 29985147 | 29985345 |
| chr13 | 29985345 | 29985623 |
| chr13 | 29985925 | 29986493 |
| chr13 | 29986516 | 29986749 |
| chr13 | 29996674 | 29996824 |
| chr13 | 30038554 | 30038811 |
| chr13 | 30041539 | 30041816 |
| chr13 | 30062394 | 30062621 |
| chr13 | 30070956 | 30071198 |
| chr13 | 30074567 | 30074754 |



|       |          |          |
|-------|----------|----------|
| chr13 | 30085045 | 30085358 |
| chr13 | 30085575 | 30085760 |
| chr13 | 30085796 | 30085991 |
| chr13 | 30093213 | 30093392 |
| chr13 | 30093762 | 30093912 |
| chr13 | 30095872 | 30096356 |
| chr13 | 30098546 | 30098696 |
| chr13 | 30108886 | 30109276 |
| chr13 | 30109276 | 30109475 |
| chr13 | 30109475 | 30109710 |
| chr13 | 30109963 | 30110200 |
| chr13 | 30136232 | 30136850 |
| chr13 | 30138004 | 30138271 |
| chr13 | 30140231 | 30140494 |
| chr13 | 30141552 | 30141860 |
| chr13 | 30145481 | 30145683 |
| chr13 | 30145768 | 30145940 |
| chr13 | 30146988 | 30147143 |
| chr13 | 30149068 | 30149553 |
| chr13 | 30149604 | 30149950 |
| chr13 | 30157824 | 30158052 |
| chr13 | 30161078 | 30161270 |
| chr13 | 30161926 | 30162368 |
| chr13 | 30169418 | 30169741 |
| chr13 | 30177456 | 30177687 |
| chr13 | 30183073 | 30183248 |
| chr13 | 30192400 | 30192607 |
| chr13 | 30194145 | 30194420 |
| chr13 | 30194784 | 30195312 |
| chr13 | 30197972 | 30198566 |
| chr13 | 30205471 | 30205920 |
| chr13 | 30251505 | 30251776 |
| chr13 | 30259925 | 30260259 |
| chr13 | 30263483 | 30263646 |
| chr13 | 30263646 | 30263871 |
| chr13 | 30272353 | 30272614 |
| chr13 | 30336231 | 30336479 |
| chr13 | 30336479 | 30336758 |
| chr13 | 30358864 | 30359089 |
| chr13 | 30368631 | 30369103 |
| chr13 | 30452079 | 30452491 |
| chr13 | 30460601 | 30460978 |

|       |          |          |
|-------|----------|----------|
| chr13 | 30530862 | 30531087 |
| chr13 | 30533262 | 30533489 |
| chr13 | 30544801 | 30545012 |
| chr13 | 30545012 | 30545250 |
| chr13 | 30545250 | 30545568 |
| chr13 | 30548893 | 30549192 |
| chr13 | 30550387 | 30550708 |
| chr13 | 30550812 | 30551045 |
| chr13 | 30553138 | 30553361 |
| chr13 | 30565000 | 30565265 |
| chr13 | 30565265 | 30565477 |
| chr13 | 30566863 | 30567090 |
| chr13 | 30604023 | 30604299 |
| chr13 | 30619754 | 30620047 |
| chr13 | 30621772 | 30622080 |
| chr13 | 30628522 | 30628710 |
| chr13 | 30642014 | 30642498 |
| chr13 | 30646949 | 30647446 |
| chr13 | 30652252 | 30652481 |
| chr13 | 30659542 | 30659848 |
| chr13 | 30659848 | 30660486 |
| chr13 | 30665345 | 30665497 |
| chr13 | 30691945 | 30692184 |
| chr13 | 30704681 | 30704863 |
| chr13 | 30713585 | 30713960 |
| chr13 | 30725076 | 30725282 |
| chr13 | 30728848 | 30729090 |
| chr13 | 30729428 | 30729613 |
| chr13 | 30730125 | 30730348 |
| chr13 | 30749035 | 30749268 |
| chr13 | 30749337 | 30749477 |
| chr13 | 30749477 | 30749630 |
| chr13 | 30752660 | 30752871 |
| chr13 | 30769328 | 30769478 |
| chr13 | 30781852 | 30782300 |
| chr13 | 30782300 | 30782700 |
| chr13 | 30786197 | 30786530 |
| chr13 | 30786636 | 30786927 |
| chr13 | 30792192 | 30792782 |
| chr13 | 30792893 | 30793064 |
| chr13 | 30793332 | 30794042 |
| chr13 | 30796236 | 30796444 |

|       |          |          |
|-------|----------|----------|
| chr13 | 30811644 | 30811806 |
| chr13 | 30814320 | 30814500 |
| chr13 | 30888547 | 30888808 |
| chr13 | 30931670 | 30931952 |
| chr13 | 30972157 | 30972477 |
| chr13 | 30973627 | 30974286 |
| chr13 | 30974340 | 30974492 |
| chr13 | 30981745 | 30981985 |
| chr13 | 30990308 | 30990587 |
| chr13 | 30993914 | 30994096 |
| chr13 | 31033269 | 31033524 |
| chr13 | 31060733 | 31061353 |
| chr13 | 31062199 | 31062553 |
| chr13 | 31062630 | 31063036 |
| chr13 | 31082552 | 31082706 |
| chr13 | 31084963 | 31085155 |
| chr13 | 31107224 | 31107426 |
| chr13 | 31107437 | 31107790 |
| chr13 | 31125693 | 31126002 |
| chr13 | 31184865 | 31185092 |
| chr13 | 31186935 | 31187154 |
| chr13 | 31189206 | 31189484 |
| chr13 | 31197669 | 31198040 |
| chr13 | 31206271 | 31206665 |
| chr13 | 31207779 | 31208163 |
| chr13 | 31209229 | 31209460 |
| chr13 | 31215047 | 31215575 |
| chr13 | 31216327 | 31216527 |
| chr13 | 31216527 | 31216683 |
| chr13 | 31251881 | 31252169 |
| chr13 | 31257790 | 31257965 |
| chr13 | 31257965 | 31258104 |
| chr13 | 31275498 | 31275910 |
| chr13 | 31275910 | 31276137 |
| chr13 | 31279933 | 31280306 |
| chr13 | 31302463 | 31302659 |
| chr13 | 31305211 | 31305414 |
| chr13 | 31308929 | 31309248 |
| chr13 | 31309248 | 31309575 |
| chr13 | 31311304 | 31311516 |
| chr13 | 31327115 | 31327459 |
| chr13 | 31327459 | 31327717 |

|       |          |          |
|-------|----------|----------|
| chr13 | 31327717 | 31328297 |
| chr13 | 31334931 | 31335355 |
| chr13 | 31341266 | 31341464 |
| chr13 | 31342076 | 31342353 |
| chr13 | 31351583 | 31351822 |
| chr13 | 31405349 | 31405690 |
| chr13 | 31408732 | 31408991 |
| chr13 | 31429248 | 31430130 |
| chr13 | 31439895 | 31440055 |
| chr13 | 31440138 | 31440351 |
| chr13 | 31458857 | 31459104 |
| chr13 | 31465199 | 31465378 |
| chr13 | 31468078 | 31468446 |
| chr13 | 31468446 | 31468655 |
| chr13 | 31468807 | 31469007 |
| chr13 | 31473399 | 31473675 |
| chr13 | 31476487 | 31476662 |
| chr13 | 31477313 | 31477496 |
| chr13 | 31491662 | 31492113 |
| chr13 | 31492505 | 31492718 |
| chr13 | 31501125 | 31501361 |
| chr13 | 31504393 | 31504661 |
| chr13 | 31506203 | 31506794 |
| chr13 | 31506794 | 31507110 |
| chr13 | 31518290 | 31519012 |
| chr13 | 31519528 | 31519702 |
| chr13 | 31531059 | 31531530 |
| chr13 | 31531530 | 31531880 |
| chr13 | 31531880 | 31532183 |
| chr13 | 31538847 | 31539024 |
| chr13 | 31547673 | 31547934 |
| chr13 | 31557780 | 31557991 |
| chr13 | 31557991 | 31558323 |
| chr13 | 31558323 | 31558665 |
| chr13 | 31558730 | 31558897 |
| chr13 | 31558900 | 31559138 |
| chr13 | 31559138 | 31559311 |
| chr13 | 31559311 | 31559612 |
| chr13 | 31559612 | 31559925 |
| chr13 | 31559925 | 31560196 |
| chr13 | 31567158 | 31567554 |
| chr13 | 31567554 | 31567984 |

|       |          |          |
|-------|----------|----------|
| chr13 | 31567984 | 31568378 |
| chr13 | 31572938 | 31573171 |
| chr13 | 31573171 | 31573531 |
| chr13 | 31577737 | 31577940 |
| chr13 | 31578366 | 31578894 |
| chr13 | 31579924 | 31580224 |
| chr13 | 31584159 | 31584421 |
| chr13 | 31618234 | 31618579 |
| chr13 | 31618579 | 31618833 |
| chr13 | 31619644 | 31619905 |
| chr13 | 31625066 | 31625270 |
| chr13 | 31625409 | 31625727 |
| chr13 | 31625727 | 31626020 |
| chr13 | 31626020 | 31626254 |
| chr13 | 31626254 | 31626590 |
| chr13 | 31626592 | 31626790 |
| chr13 | 31626790 | 31627179 |
| chr13 | 31629477 | 31629810 |
| chr13 | 31632470 | 31632791 |
| chr13 | 31639321 | 31640000 |
| chr13 | 31640145 | 31640433 |
| chr13 | 31659175 | 31659335 |
| chr13 | 31689420 | 31689629 |
| chr13 | 31696472 | 31696715 |
| chr13 | 31714108 | 31714259 |
| chr13 | 31738431 | 31738621 |
| chr13 | 31768742 | 31768892 |
| chr13 | 31781366 | 31781578 |
| chr13 | 31792519 | 31792797 |
| chr13 | 31800641 | 31800804 |
| chr13 | 31801047 | 31801255 |
| chr13 | 31801255 | 31801653 |
| chr13 | 31806173 | 31806401 |
| chr13 | 31806401 | 31806862 |
| chr13 | 31806972 | 31807571 |
| chr13 | 31807581 | 31807984 |
| chr13 | 31807987 | 31808450 |
| chr13 | 31808450 | 31808738 |
| chr13 | 31826739 | 31826947 |
| chr13 | 31835934 | 31836187 |
| chr13 | 31877188 | 31877340 |
| chr13 | 31884479 | 31884753 |

|       |          |          |
|-------|----------|----------|
| chr13 | 31915800 | 31916071 |
| chr13 | 31955207 | 31955397 |
| chr13 | 31956678 | 31956890 |
| chr13 | 31969973 | 31970158 |
| chr13 | 32025716 | 32025984 |
| chr13 | 32055450 | 32055609 |
| chr13 | 32091316 | 32091637 |
| chr13 | 32092490 | 32092868 |
| chr13 | 32116230 | 32116415 |
| chr13 | 32134515 | 32134749 |
| chr13 | 32134749 | 32135045 |
| chr13 | 32135045 | 32135345 |
| chr13 | 32169309 | 32169539 |
| chr13 | 32193066 | 32193307 |
| chr13 | 32214154 | 32214391 |
| chr13 | 32219987 | 32220327 |
| chr13 | 32242211 | 32242591 |
| chr13 | 32251141 | 32251360 |
| chr13 | 32267189 | 32267423 |
| chr13 | 32268309 | 32268523 |
| chr13 | 32297460 | 32297786 |
| chr13 | 32298547 | 32298833 |
| chr13 | 32312739 | 32312996 |
| chr13 | 32318323 | 32318605 |
| chr13 | 32318632 | 32318782 |
| chr13 | 32329839 | 32330061 |
| chr13 | 32337789 | 32338150 |
| chr13 | 32338150 | 32338510 |
| chr13 | 32338510 | 32338968 |
| chr13 | 32348969 | 32349200 |
| chr13 | 32370793 | 32371243 |
| chr13 | 32371910 | 32372228 |
| chr13 | 32372228 | 32372534 |
| chr13 | 32375704 | 32375926 |
| chr13 | 32411672 | 32411904 |
| chr13 | 32414591 | 32414818 |
| chr13 | 32415269 | 32415569 |
| chr13 | 32428160 | 32428465 |
| chr13 | 32428465 | 32428912 |
| chr13 | 32478925 | 32479411 |
| chr13 | 32479411 | 32479668 |
| chr13 | 32493421 | 32493598 |

|       |          |          |
|-------|----------|----------|
| chr13 | 32493853 | 32494134 |
| chr13 | 32496995 | 32497161 |
| chr13 | 32509797 | 32509947 |
| chr13 | 32515100 | 32515360 |
| chr13 | 32545003 | 32545336 |
| chr13 | 32545336 | 32545714 |
| chr13 | 32549996 | 32550351 |
| chr13 | 32555662 | 32555834 |
| chr13 | 32555834 | 32556005 |
| chr13 | 32556016 | 32556360 |
| chr13 | 32556362 | 32556901 |
| chr13 | 32565689 | 32565956 |
| chr13 | 32581308 | 32581574 |
| chr13 | 32583238 | 32583408 |
| chr13 | 32592853 | 32593139 |
| chr13 | 32593255 | 32593405 |
| chr13 | 32604292 | 32604476 |
| chr13 | 32605632 | 32605909 |
| chr13 | 32610761 | 32611410 |
| chr13 | 32611491 | 32611759 |
| chr13 | 32630293 | 32630642 |
| chr13 | 32660444 | 32660706 |
| chr13 | 32662108 | 32662345 |
| chr13 | 32678951 | 32679302 |
| chr13 | 32681204 | 32681466 |
| chr13 | 32707911 | 32708233 |
| chr13 | 32721303 | 32721689 |
| chr13 | 32721689 | 32722174 |
| chr13 | 32734389 | 32734655 |
| chr13 | 32769963 | 32770197 |
| chr13 | 32801731 | 32802190 |
| chr13 | 32802190 | 32802443 |
| chr13 | 32802443 | 32802763 |
| chr13 | 32802763 | 32803094 |
| chr13 | 32809993 | 32810302 |
| chr13 | 32828013 | 32828246 |
| chr13 | 32829001 | 32829205 |
| chr13 | 32831669 | 32831835 |
| chr13 | 32846248 | 32846729 |
| chr13 | 32852041 | 32852284 |
| chr13 | 32860922 | 32861105 |
| chr13 | 32861923 | 32862073 |

|       |          |          |
|-------|----------|----------|
| chr13 | 32862537 | 32862815 |
| chr13 | 32865671 | 32865868 |
| chr13 | 32866511 | 32866819 |
| chr13 | 32884108 | 32884413 |
| chr13 | 32884803 | 32885139 |
| chr13 | 32900721 | 32900948 |
| chr13 | 32902540 | 32902837 |
| chr13 | 32903239 | 32903727 |
| chr13 | 32903736 | 32903887 |
| chr13 | 32905005 | 32905229 |
| chr13 | 32912810 | 32913064 |
| chr13 | 32913131 | 32913291 |
| chr13 | 32923926 | 32924157 |
| chr13 | 32924894 | 32925407 |
| chr13 | 32926732 | 32926966 |
| chr13 | 32927481 | 32927658 |
| chr13 | 32928042 | 32928484 |
| chr13 | 32933820 | 32933979 |
| chr13 | 32934737 | 32935065 |
| chr13 | 32935065 | 32935417 |
| chr13 | 32938398 | 32938594 |
| chr13 | 32939090 | 32939956 |
| chr13 | 32957952 | 32958289 |
| chr13 | 32960338 | 32960497 |
| chr13 | 32963991 | 32964397 |
| chr13 | 32964397 | 32964808 |
| chr13 | 32964912 | 32965479 |
| chr13 | 32965479 | 32965841 |
| chr13 | 32978683 | 32978843 |
| chr13 | 32982679 | 32983111 |
| chr13 | 32995058 | 32995265 |
| chr13 | 33001022 | 33001183 |
| chr13 | 33003583 | 33003750 |
| chr13 | 33003830 | 33004041 |
| chr13 | 33004331 | 33005019 |
| chr13 | 33005786 | 33006015 |
| chr13 | 33006613 | 33006948 |
| chr13 | 33013379 | 33013535 |
| chr13 | 33026561 | 33026721 |
| chr13 | 33026807 | 33027119 |
| chr13 | 33028158 | 33028519 |
| chr13 | 33028519 | 33029043 |



|       |          |          |
|-------|----------|----------|
| chr13 | 33029570 | 33029744 |
| chr13 | 33030365 | 33030607 |
| chr13 | 33050820 | 33051222 |
| chr13 | 33051222 | 33051651 |
| chr13 | 33051651 | 33052225 |
| chr13 | 33063132 | 33063367 |
| chr13 | 33065961 | 33066204 |
| chr13 | 33074079 | 33074366 |
| chr13 | 33078393 | 33078696 |
| chr13 | 33079505 | 33079766 |
| chr13 | 33080389 | 33080702 |
| chr13 | 33085725 | 33085973 |
| chr13 | 33089692 | 33089974 |
| chr13 | 33090563 | 33090906 |
| chr13 | 33109068 | 33109300 |
| chr13 | 33120448 | 33121267 |
| chr13 | 33134072 | 33134271 |
| chr13 | 33141104 | 33141254 |
| chr13 | 33141324 | 33141775 |
| chr13 | 33158484 | 33158699 |
| chr13 | 33182259 | 33182581 |
| chr13 | 33182581 | 33182834 |
| chr13 | 33193349 | 33193709 |
| chr13 | 33193709 | 33194167 |
| chr13 | 33194236 | 33194418 |
| chr13 | 33249413 | 33249622 |
| chr13 | 33249970 | 33250157 |
| chr13 | 33250157 | 33250391 |
| chr13 | 33250391 | 33250659 |
| chr13 | 33250659 | 33250897 |
| chr13 | 33253807 | 33254026 |
| chr13 | 33289197 | 33289406 |
| chr13 | 33323846 | 33324063 |
| chr13 | 33324448 | 33324805 |
| chr13 | 33324846 | 33325341 |
| chr13 | 33363834 | 33364041 |
| chr13 | 33409216 | 33409374 |
| chr13 | 33448992 | 33449187 |
| chr13 | 33484591 | 33484807 |
| chr13 | 33485171 | 33485577 |
| chr13 | 33485577 | 33486053 |
| chr13 | 33514772 | 33515089 |

|       |          |          |
|-------|----------|----------|
| chr13 | 33518375 | 33518668 |
| chr13 | 33522256 | 33522473 |
| chr13 | 33544778 | 33545017 |
| chr13 | 33559674 | 33560056 |
| chr13 | 33561634 | 33562040 |
| chr13 | 33562040 | 33562328 |
| chr13 | 33569323 | 33569693 |
| chr13 | 33570837 | 33571369 |
| chr13 | 33577986 | 33578136 |
| chr13 | 33585882 | 33586119 |
| chr13 | 33586119 | 33586593 |
| chr13 | 33688512 | 33688781 |
| chr13 | 33762814 | 33763097 |
| chr13 | 33764684 | 33765169 |
| chr13 | 33788856 | 33789085 |
| chr13 | 33789868 | 33790203 |
| chr13 | 33821060 | 33821218 |
| chr13 | 33821261 | 33821558 |
| chr13 | 33821558 | 33821854 |
| chr13 | 33823373 | 33823708 |
| chr13 | 33823708 | 33823985 |
| chr13 | 33894263 | 33894505 |
| chr13 | 33903343 | 33903627 |
| chr13 | 33908296 | 33908561 |
| chr13 | 33934664 | 33935067 |
| chr13 | 33935413 | 33935680 |
| chr13 | 33935680 | 33935911 |
| chr13 | 33935911 | 33936221 |
| chr13 | 33951195 | 33951681 |
| chr13 | 33951681 | 33952058 |
| chr13 | 33952058 | 33952434 |
| chr13 | 33956882 | 33957108 |
| chr13 | 33957147 | 33957299 |
| chr13 | 33964354 | 33965201 |
| chr13 | 33965233 | 33965440 |
| chr13 | 33965734 | 33965915 |
| chr13 | 33995268 | 33995555 |
| chr13 | 34001999 | 34002247 |
| chr13 | 34002247 | 34002478 |
| chr13 | 34002478 | 34002715 |
| chr13 | 34002715 | 34003038 |
| chr13 | 34028354 | 34028504 |

|       |          |          |
|-------|----------|----------|
| chr13 | 34032186 | 34032382 |
| chr13 | 34032625 | 34032921 |
| chr13 | 34032963 | 34033354 |
| chr13 | 34037153 | 34037491 |
| chr13 | 34037491 | 34037732 |
| chr13 | 34037732 | 34038022 |
| chr13 | 34043900 | 34044107 |
| chr13 | 34046425 | 34046723 |
| chr13 | 34050602 | 34050849 |
| chr13 | 34054455 | 34054722 |
| chr13 | 34066345 | 34066646 |
| chr13 | 34075934 | 34076233 |
| chr13 | 34077653 | 34078414 |
| chr13 | 34079795 | 34080234 |
| chr13 | 34084053 | 34084247 |
| chr13 | 34087092 | 34087501 |
| chr13 | 34088194 | 34088697 |
| chr13 | 34095971 | 34096445 |
| chr13 | 34096480 | 34096898 |
| chr13 | 34096955 | 34097426 |
| chr13 | 34109776 | 34110014 |
| chr13 | 34112310 | 34112914 |
| chr13 | 34113142 | 34113438 |
| chr13 | 34115871 | 34116052 |
| chr13 | 34129785 | 34129993 |
| chr13 | 34129993 | 34130308 |
| chr13 | 34130308 | 34130894 |
| chr13 | 34131031 | 34131352 |
| chr13 | 34147051 | 34147270 |
| chr13 | 34147659 | 34147908 |
| chr13 | 34153983 | 34154277 |
| chr13 | 34154277 | 34154700 |
| chr13 | 34154725 | 34154930 |
| chr13 | 34154957 | 34155192 |
| chr13 | 34155256 | 34155411 |
| chr13 | 34156232 | 34156453 |
| chr13 | 34162646 | 34163078 |
| chr13 | 34163078 | 34163590 |
| chr13 | 34178240 | 34178495 |
| chr13 | 34187568 | 34187794 |
| chr13 | 34190406 | 34190752 |
| chr13 | 34191869 | 34192191 |

|       |          |          |
|-------|----------|----------|
| chr13 | 34192309 | 34192695 |
| chr13 | 34192695 | 34192908 |
| chr13 | 34192908 | 34193159 |
| chr13 | 34200818 | 34200968 |
| chr13 | 34201580 | 34201961 |
| chr13 | 34208127 | 34208423 |
| chr13 | 34209945 | 34210243 |
| chr13 | 34211403 | 34211718 |
| chr13 | 34212524 | 34212970 |
| chr13 | 34212970 | 34213444 |
| chr13 | 34214151 | 34214303 |
| chr13 | 34224274 | 34224858 |
| chr13 | 34233020 | 34233336 |
| chr13 | 34234058 | 34234344 |
| chr13 | 34234362 | 34234789 |
| chr13 | 34234789 | 34235061 |
| chr13 | 34235063 | 34235450 |
| chr13 | 34246576 | 34246887 |
| chr13 | 34246887 | 34247229 |
| chr13 | 34247229 | 34247529 |
| chr13 | 34260391 | 34260541 |
| chr13 | 34267221 | 34267432 |
| chr13 | 34271124 | 34271471 |
| chr13 | 34275067 | 34275231 |
| chr13 | 34275453 | 34275710 |
| chr13 | 34277644 | 34278039 |
| chr13 | 34278140 | 34278527 |
| chr13 | 34281894 | 34282044 |
| chr13 | 34289689 | 34289921 |
| chr13 | 34290360 | 34290909 |
| chr13 | 34292104 | 34292336 |
| chr13 | 34299608 | 34299905 |
| chr13 | 34303619 | 34303958 |
| chr13 | 34305004 | 34305215 |
| chr13 | 34307789 | 34307939 |
| chr13 | 34308270 | 34308646 |
| chr13 | 34313304 | 34313513 |
| chr13 | 34314515 | 34314681 |
| chr13 | 34317067 | 34317423 |
| chr13 | 34326802 | 34327187 |
| chr13 | 34329709 | 34329872 |
| chr13 | 34330727 | 34330966 |

|       |          |          |
|-------|----------|----------|
| chr13 | 34332575 | 34332816 |
| chr13 | 34332816 | 34333168 |
| chr13 | 34334283 | 34334630 |
| chr13 | 34343885 | 34344056 |
| chr13 | 34344113 | 34344501 |
| chr13 | 34344501 | 34344750 |
| chr13 | 34344750 | 34345072 |
| chr13 | 34345072 | 34345628 |
| chr13 | 34348572 | 34348785 |
| chr13 | 34365308 | 34365561 |
| chr13 | 34369883 | 34370396 |
| chr13 | 34370396 | 34370850 |
| chr13 | 34371844 | 34372509 |
| chr13 | 34390802 | 34391068 |
| chr13 | 34391068 | 34391323 |
| chr13 | 34394547 | 34394916 |
| chr13 | 34397858 | 34398082 |
| chr13 | 34398082 | 34398452 |
| chr13 | 34398458 | 34398754 |
| chr13 | 34398912 | 34399143 |
| chr13 | 34399551 | 34399820 |
| chr13 | 34402606 | 34403043 |
| chr13 | 34408059 | 34408355 |
| chr13 | 34408355 | 34408647 |
| chr13 | 34408647 | 34408953 |
| chr13 | 34419209 | 34419465 |
| chr13 | 34419465 | 34419691 |
| chr13 | 34419774 | 34419924 |
| chr13 | 34420268 | 34420623 |
| chr13 | 34420677 | 34420914 |
| chr13 | 34420914 | 34421173 |
| chr13 | 34425099 | 34425443 |
| chr13 | 34460824 | 34461413 |
| chr13 | 34462906 | 34463269 |
| chr13 | 34465866 | 34466175 |
| chr13 | 34504936 | 34505278 |
| chr13 | 34537032 | 34537191 |
| chr13 | 34540732 | 34540999 |
| chr13 | 34553810 | 34553973 |
| chr13 | 34565111 | 34565499 |
| chr13 | 34566014 | 34566200 |
| chr13 | 34566690 | 34567091 |

|       |          |          |
|-------|----------|----------|
| chr13 | 34568283 | 34568539 |
| chr13 | 34572147 | 34572384 |
| chr13 | 34572459 | 34572784 |
| chr13 | 34572784 | 34573025 |
| chr13 | 34575859 | 34576202 |
| chr13 | 34600139 | 34600445 |
| chr13 | 34611486 | 34611646 |
| chr13 | 34629263 | 34629421 |
| chr13 | 34629473 | 34629877 |
| chr13 | 34635972 | 34636330 |
| chr13 | 34640992 | 34641452 |
| chr13 | 34641600 | 34641766 |
| chr13 | 34643084 | 34643234 |
| chr13 | 34650943 | 34651271 |
| chr13 | 34651446 | 34651779 |
| chr13 | 34652133 | 34652360 |
| chr13 | 34652360 | 34652607 |
| chr13 | 34652607 | 34652890 |
| chr13 | 34652890 | 34653394 |
| chr13 | 34653470 | 34653679 |
| chr13 | 34659329 | 34659706 |
| chr13 | 34659706 | 34660026 |
| chr13 | 34677248 | 34677446 |
| chr13 | 34677446 | 34677681 |
| chr13 | 34683177 | 34683681 |
| chr13 | 34683695 | 34683850 |
| chr13 | 34685316 | 34685551 |
| chr13 | 34689954 | 34690251 |
| chr13 | 34691100 | 34691342 |
| chr13 | 34691342 | 34691629 |
| chr13 | 34696758 | 34697164 |
| chr13 | 34697164 | 34697636 |
| chr13 | 34708944 | 34709458 |
| chr13 | 34709559 | 34709922 |
| chr13 | 34711448 | 34711749 |
| chr13 | 34715107 | 34715402 |
| chr13 | 34715402 | 34715991 |
| chr13 | 34725819 | 34726112 |
| chr13 | 34726129 | 34726495 |
| chr13 | 34726495 | 34726761 |
| chr13 | 34731921 | 34732198 |
| chr13 | 34733676 | 34734164 |

|       |          |          |
|-------|----------|----------|
| chr13 | 34736059 | 34736427 |
| chr13 | 34736675 | 34736937 |
| chr13 | 34748522 | 34748889 |
| chr13 | 34761972 | 34762189 |
| chr13 | 34762189 | 34762456 |
| chr13 | 34763634 | 34763874 |
| chr13 | 34765326 | 34765653 |
| chr13 | 34766644 | 34766902 |
| chr13 | 34767697 | 34767896 |
| chr13 | 34784653 | 34785237 |
| chr13 | 34793656 | 34793973 |
| chr13 | 34794016 | 34794209 |
| chr13 | 34794209 | 34794435 |
| chr13 | 34794450 | 34794652 |
| chr13 | 34806815 | 34807016 |
| chr13 | 34828341 | 34828567 |
| chr13 | 34861305 | 34861491 |
| chr13 | 34864444 | 34864766 |
| chr13 | 34874138 | 34874645 |
| chr13 | 34875159 | 34875721 |
| chr13 | 34875721 | 34876203 |
| chr13 | 34888888 | 34889043 |
| chr13 | 34896707 | 34896982 |
| chr13 | 34898204 | 34898823 |
| chr13 | 34973867 | 34974029 |
| chr13 | 34993594 | 34993960 |
| chr13 | 34993960 | 34994448 |
| chr13 | 34994448 | 34994829 |
| chr13 | 35027044 | 35027208 |
| chr13 | 35031825 | 35031984 |
| chr13 | 35038167 | 35038533 |
| chr13 | 35038533 | 35038814 |
| chr13 | 35038814 | 35039251 |
| chr13 | 35086423 | 35086622 |
| chr13 | 35131253 | 35132105 |
| chr13 | 35147948 | 35148399 |
| chr13 | 35166226 | 35166434 |
| chr13 | 35167792 | 35168017 |
| chr13 | 35208171 | 35208647 |
| chr13 | 35209040 | 35209255 |
| chr13 | 35214998 | 35215167 |
| chr13 | 35215167 | 35215356 |

|       |          |          |
|-------|----------|----------|
| chr13 | 35217443 | 35218027 |
| chr13 | 35227571 | 35227822 |
| chr13 | 35255306 | 35255538 |
| chr13 | 35255538 | 35255732 |
| chr13 | 35257449 | 35257734 |
| chr13 | 35263428 | 35263807 |
| chr13 | 35283933 | 35284373 |
| chr13 | 35291529 | 35291687 |
| chr13 | 35328176 | 35328776 |
| chr13 | 35328806 | 35329246 |
| chr13 | 35329339 | 35329523 |
| chr13 | 35330206 | 35330550 |
| chr13 | 35346764 | 35347033 |
| chr13 | 35386290 | 35386618 |
| chr13 | 35395068 | 35395592 |
| chr13 | 35395592 | 35396086 |
| chr13 | 35403767 | 35404020 |
| chr13 | 35418873 | 35419180 |
| chr13 | 35433778 | 35434045 |
| chr13 | 35434045 | 35434420 |
| chr13 | 35435195 | 35435499 |
| chr13 | 35446587 | 35446808 |
| chr13 | 35450628 | 35450795 |
| chr13 | 35451146 | 35451322 |
| chr13 | 35452523 | 35453090 |
| chr13 | 35454978 | 35455297 |
| chr13 | 35463964 | 35464241 |
| chr13 | 35464518 | 35464677 |
| chr13 | 35467452 | 35467655 |
| chr13 | 35469315 | 35469556 |
| chr13 | 35469556 | 35469985 |
| chr13 | 35474351 | 35474592 |
| chr13 | 35474622 | 35475191 |
| chr13 | 35476168 | 35476568 |
| chr13 | 35476568 | 35476894 |
| chr13 | 35481202 | 35481698 |
| chr13 | 35501687 | 35502119 |
| chr13 | 35502119 | 35502518 |
| chr13 | 35502793 | 35503132 |
| chr13 | 35507162 | 35507518 |
| chr13 | 35512453 | 35512740 |
| chr13 | 35518296 | 35518490 |



|       |          |          |
|-------|----------|----------|
| chr13 | 35519472 | 35519982 |
| chr13 | 35524511 | 35524991 |
| chr13 | 35541407 | 35541623 |
| chr13 | 35563922 | 35564127 |
| chr13 | 35604044 | 35604247 |
| chr13 | 35732225 | 35732547 |
| chr13 | 35740532 | 35741014 |
| chr13 | 35741014 | 35741243 |
| chr13 | 35741243 | 35741506 |
| chr13 | 35741506 | 35741927 |
| chr13 | 35741989 | 35742185 |
| chr13 | 35755984 | 35756177 |
| chr13 | 35760442 | 35760693 |
| chr13 | 35760872 | 35761074 |
| chr13 | 35765851 | 35766192 |
| chr13 | 35773815 | 35774329 |
| chr13 | 35774823 | 35775217 |
| chr13 | 35781861 | 35782026 |
| chr13 | 35782959 | 35783241 |
| chr13 | 35798753 | 35798909 |
| chr13 | 35816074 | 35816229 |
| chr13 | 35817709 | 35817963 |
| chr13 | 35820195 | 35820551 |
| chr13 | 35860783 | 35861167 |
| chr13 | 35871314 | 35871508 |
| chr13 | 35886482 | 35886649 |
| chr13 | 35905774 | 35906213 |
| chr13 | 35906213 | 35906563 |
| chr13 | 35947429 | 35947657 |
| chr13 | 35947696 | 35947990 |
| chr13 | 35968177 | 35968465 |
| chr13 | 35968465 | 35968760 |
| chr13 | 35968760 | 35969085 |
| chr13 | 35969085 | 35969419 |
| chr13 | 35969419 | 35969705 |
| chr13 | 35991283 | 35991496 |
| chr13 | 35994064 | 35994478 |
| chr13 | 36000068 | 36000362 |
| chr13 | 36000820 | 36001187 |
| chr13 | 36001335 | 36001548 |
| chr13 | 36009859 | 36010078 |
| chr13 | 36010615 | 36010829 |

|       |          |          |
|-------|----------|----------|
| chr13 | 36013571 | 36013896 |
| chr13 | 36028850 | 36029156 |
| chr13 | 36052618 | 36053054 |
| chr13 | 36081443 | 36081721 |
| chr13 | 36081721 | 36082003 |
| chr13 | 36086596 | 36086936 |
| chr13 | 36090908 | 36091249 |
| chr13 | 36116835 | 36117062 |
| chr13 | 36117240 | 36117520 |
| chr13 | 36117520 | 36117731 |
| chr13 | 36117731 | 36118108 |
| chr13 | 36139599 | 36139754 |
| chr13 | 36152839 | 36153149 |
| chr13 | 36153149 | 36153433 |
| chr13 | 36162949 | 36163405 |
| chr13 | 36163405 | 36163758 |
| chr13 | 36196722 | 36197069 |
| chr13 | 36200545 | 36200782 |
| chr13 | 36203019 | 36203438 |
| chr13 | 36204594 | 36204831 |
| chr13 | 36211032 | 36211235 |
| chr13 | 36214146 | 36214404 |
| chr13 | 36282159 | 36282381 |
| chr13 | 36282870 | 36283102 |
| chr13 | 36283132 | 36283619 |
| chr13 | 36315560 | 36315750 |
| chr13 | 36316186 | 36316647 |
| chr13 | 36317222 | 36317508 |
| chr13 | 36317576 | 36317746 |
| chr13 | 36317961 | 36318306 |
| chr13 | 36368390 | 36368580 |
| chr13 | 36377452 | 36377664 |
| chr13 | 36452231 | 36452457 |
| chr13 | 36463307 | 36463516 |
| chr13 | 36463631 | 36464063 |
| chr13 | 36465403 | 36465660 |
| chr13 | 36513060 | 36513504 |
| chr13 | 36516334 | 36516801 |
| chr13 | 36520344 | 36520642 |
| chr13 | 36522053 | 36522272 |
| chr13 | 36522272 | 36522650 |
| chr13 | 36524343 | 36524621 |

|       |          |          |
|-------|----------|----------|
| chr13 | 36529578 | 36529773 |
| chr13 | 36529773 | 36529959 |
| chr13 | 36530420 | 36530797 |
| chr13 | 36530797 | 36531263 |
| chr13 | 36534125 | 36534486 |
| chr13 | 36534486 | 36534928 |
| chr13 | 36546685 | 36546931 |
| chr13 | 36547066 | 36547338 |
| chr13 | 36547533 | 36547703 |
| chr13 | 36548538 | 36548868 |
| chr13 | 36575152 | 36575381 |
| chr13 | 36576894 | 36577071 |
| chr13 | 36578514 | 36578894 |
| chr13 | 36578894 | 36579219 |
| chr13 | 36590220 | 36590385 |
| chr13 | 36610696 | 36610851 |
| chr13 | 36695804 | 36696271 |
| chr13 | 36696271 | 36696776 |
| chr13 | 36703322 | 36703508 |
| chr13 | 36720771 | 36720921 |
| chr13 | 36726505 | 36726938 |
| chr13 | 36726938 | 36727429 |
| chr13 | 36727429 | 36727858 |
| chr13 | 36734114 | 36734321 |
| chr13 | 36734397 | 36734631 |
| chr13 | 36734687 | 36734976 |
| chr13 | 36734976 | 36735259 |
| chr13 | 36736028 | 36736516 |
| chr13 | 36740746 | 36741002 |
| chr13 | 36802999 | 36803280 |
| chr13 | 36804232 | 36804430 |
| chr13 | 36821762 | 36821913 |
| chr13 | 36828356 | 36828840 |
| chr13 | 36828840 | 36829272 |
| chr13 | 36829305 | 36829456 |
| chr13 | 36839175 | 36839447 |
| chr13 | 36873959 | 36874216 |
| chr13 | 36940345 | 36940696 |
| chr13 | 36947725 | 36948108 |
| chr13 | 36948373 | 36948669 |
| chr13 | 36958491 | 36958671 |
| chr13 | 36958712 | 36959025 |

|       |          |          |
|-------|----------|----------|
| chr13 | 36962204 | 36962709 |
| chr13 | 36962991 | 36963312 |
| chr13 | 36963925 | 36964120 |
| chr13 | 36978494 | 36978741 |
| chr13 | 36978741 | 36979004 |
| chr13 | 36986558 | 36986896 |
| chr13 | 37010478 | 37010804 |
| chr13 | 37010804 | 37011090 |
| chr13 | 37011717 | 37012262 |
| chr13 | 37019460 | 37019720 |
| chr13 | 37045136 | 37045303 |
| chr13 | 37052001 | 37052444 |
| chr13 | 37052444 | 37052907 |
| chr13 | 37106137 | 37106334 |
| chr13 | 37107917 | 37108136 |
| chr13 | 37108887 | 37109309 |
| chr13 | 37109543 | 37109693 |
| chr13 | 37176570 | 37176830 |
| chr13 | 37193870 | 37194225 |
| chr13 | 37194225 | 37194525 |
| chr13 | 37234866 | 37235088 |
| chr13 | 37238090 | 37238267 |
| chr13 | 37241219 | 37241457 |
| chr13 | 37290647 | 37290963 |
| chr13 | 37298913 | 37299199 |
| chr13 | 37312268 | 37312619 |
| chr13 | 37312619 | 37313088 |
| chr13 | 37325558 | 37325804 |
| chr13 | 37358205 | 37358440 |
| chr13 | 37364372 | 37364827 |
| chr13 | 37417476 | 37417659 |
| chr13 | 37428544 | 37428827 |
| chr13 | 37431082 | 37431437 |
| chr13 | 37431568 | 37431792 |
| chr13 | 37434116 | 37434356 |
| chr13 | 37441029 | 37441207 |
| chr13 | 37452448 | 37452736 |
| chr13 | 37453191 | 37453481 |
| chr13 | 37454208 | 37454857 |
| chr13 | 37456949 | 37457326 |
| chr13 | 37465542 | 37466099 |
| chr13 | 37474421 | 37474644 |

|       |          |          |
|-------|----------|----------|
| chr13 | 37474963 | 37475251 |
| chr13 | 37477705 | 37478213 |
| chr13 | 37478316 | 37478466 |
| chr13 | 37506754 | 37507066 |
| chr13 | 37507088 | 37507516 |
| chr13 | 37508997 | 37509208 |
| chr13 | 37520034 | 37520295 |
| chr13 | 37529069 | 37529454 |
| chr13 | 37531598 | 37531814 |
| chr13 | 37541650 | 37542052 |
| chr13 | 37546251 | 37546739 |
| chr13 | 37546739 | 37547151 |
| chr13 | 37547151 | 37547448 |
| chr13 | 37550373 | 37550564 |
| chr13 | 37556954 | 37557814 |
| chr13 | 37561437 | 37561749 |
| chr13 | 37591963 | 37592601 |
| chr13 | 37599990 | 37600185 |
| chr13 | 37601207 | 37601372 |
| chr13 | 37615690 | 37615844 |
| chr13 | 37619843 | 37620183 |
| chr13 | 37622376 | 37622754 |
| chr13 | 37622754 | 37623061 |
| chr13 | 37624843 | 37625062 |
| chr13 | 37625122 | 37625396 |
| chr13 | 37642843 | 37643034 |
| chr13 | 37643396 | 37643563 |
| chr13 | 37651329 | 37651537 |
| chr13 | 37666144 | 37666482 |
| chr13 | 37666482 | 37667067 |
| chr13 | 37671176 | 37671491 |
| chr13 | 37672676 | 37672826 |
| chr13 | 37678789 | 37679010 |
| chr13 | 37680826 | 37681264 |
| chr13 | 37681272 | 37681519 |
| chr13 | 37690324 | 37690492 |
| chr13 | 37690527 | 37690730 |
| chr13 | 37703399 | 37703918 |
| chr13 | 37704538 | 37705166 |
| chr13 | 37705556 | 37705782 |
| chr13 | 37707636 | 37707835 |
| chr13 | 37712957 | 37713199 |

|       |          |          |
|-------|----------|----------|
| chr13 | 37714998 | 37715776 |
| chr13 | 37715879 | 37716036 |
| chr13 | 37716208 | 37716648 |
| chr13 | 37725879 | 37726044 |
| chr13 | 37732517 | 37732667 |
| chr13 | 37751324 | 37751479 |
| chr13 | 37761037 | 37761241 |
| chr13 | 37777357 | 37777730 |
| chr13 | 37777762 | 37778034 |
| chr13 | 37778086 | 37778324 |
| chr13 | 37778324 | 37778760 |
| chr13 | 37778760 | 37779380 |
| chr13 | 37783608 | 37783851 |
| chr13 | 37783851 | 37784134 |
| chr13 | 37784219 | 37784659 |
| chr13 | 37801094 | 37801419 |
| chr13 | 37818273 | 37818557 |
| chr13 | 37825079 | 37825298 |
| chr13 | 37825763 | 37826150 |
| chr13 | 37826398 | 37827099 |
| chr13 | 37827176 | 37827441 |
| chr13 | 37827561 | 37827741 |
| chr13 | 37827774 | 37827992 |
| chr13 | 37828947 | 37829211 |
| chr13 | 37830807 | 37831082 |
| chr13 | 37831082 | 37831427 |
| chr13 | 37846962 | 37847465 |
| chr13 | 37847566 | 37848133 |
| chr13 | 37852921 | 37853129 |
| chr13 | 37853635 | 37853793 |
| chr13 | 37853947 | 37854438 |
| chr13 | 37854581 | 37854761 |
| chr13 | 37857382 | 37858053 |
| chr13 | 37864409 | 37864624 |
| chr13 | 37864765 | 37864918 |
| chr13 | 37866339 | 37866782 |
| chr13 | 37866973 | 37867148 |
| chr13 | 37880143 | 37880322 |
| chr13 | 37895399 | 37895644 |
| chr13 | 37895644 | 37895909 |
| chr13 | 37895920 | 37896340 |
| chr13 | 37926979 | 37927282 |

|       |          |          |
|-------|----------|----------|
| chr13 | 37936446 | 37936708 |
| chr13 | 37944377 | 37944653 |
| chr13 | 37945441 | 37945693 |
| chr13 | 37946462 | 37946752 |
| chr13 | 37946752 | 37947059 |
| chr13 | 37953065 | 37953312 |
| chr13 | 37953312 | 37953561 |
| chr13 | 37963295 | 37963708 |
| chr13 | 37963708 | 37963939 |
| chr13 | 37966760 | 37966979 |
| chr13 | 37969413 | 37969676 |
| chr13 | 37970943 | 37971194 |
| chr13 | 37973999 | 37974155 |
| chr13 | 37992977 | 37993155 |
| chr13 | 37993547 | 37993967 |
| chr13 | 37993967 | 37994451 |
| chr13 | 37999840 | 38000028 |
| chr13 | 38012568 | 38012718 |
| chr13 | 38016660 | 38016816 |
| chr13 | 38024935 | 38025092 |
| chr13 | 38036763 | 38037076 |
| chr13 | 38037076 | 38037343 |
| chr13 | 38037343 | 38037659 |
| chr13 | 38037887 | 38038100 |
| chr13 | 38064859 | 38065301 |
| chr13 | 38088116 | 38088302 |
| chr13 | 38089809 | 38089961 |
| chr13 | 38089964 | 38090167 |
| chr13 | 38091549 | 38091917 |
| chr13 | 38096328 | 38096583 |
| chr13 | 38098736 | 38099143 |
| chr13 | 38104586 | 38104754 |
| chr13 | 38110801 | 38111042 |
| chr13 | 38123602 | 38124084 |
| chr13 | 38130248 | 38130590 |
| chr13 | 38132759 | 38132966 |
| chr13 | 38144990 | 38145325 |
| chr13 | 38145325 | 38145624 |
| chr13 | 38150581 | 38150788 |
| chr13 | 38151020 | 38151606 |
| chr13 | 38151606 | 38152178 |
| chr13 | 38152244 | 38152496 |

|       |          |          |
|-------|----------|----------|
| chr13 | 38152496 | 38152769 |
| chr13 | 38152769 | 38153014 |
| chr13 | 38153765 | 38154031 |
| chr13 | 38204259 | 38204490 |
| chr13 | 38204699 | 38205060 |
| chr13 | 38205060 | 38205496 |
| chr13 | 38229471 | 38229818 |
| chr13 | 38233027 | 38233182 |
| chr13 | 38235461 | 38235631 |
| chr13 | 38251098 | 38251255 |
| chr13 | 38251297 | 38251573 |
| chr13 | 38257464 | 38257699 |
| chr13 | 38276453 | 38276926 |
| chr13 | 38277478 | 38277744 |
| chr13 | 38288341 | 38288649 |
| chr13 | 38288649 | 38288949 |
| chr13 | 38311964 | 38312372 |
| chr13 | 38312372 | 38312672 |
| chr13 | 38312672 | 38312960 |
| chr13 | 38320303 | 38320766 |
| chr13 | 38335002 | 38335194 |
| chr13 | 38338115 | 38338416 |
| chr13 | 38338416 | 38338684 |
| chr13 | 38342728 | 38342878 |
| chr13 | 38343377 | 38343544 |
| chr13 | 38344905 | 38345247 |
| chr13 | 38345505 | 38345744 |
| chr13 | 38348613 | 38348936 |
| chr13 | 38349739 | 38350193 |
| chr13 | 38350376 | 38350542 |
| chr13 | 38360794 | 38361100 |
| chr13 | 38361183 | 38361510 |
| chr13 | 38361510 | 38361747 |
| chr13 | 38376171 | 38376344 |
| chr13 | 38387731 | 38387933 |
| chr13 | 38390808 | 38391317 |
| chr13 | 38398751 | 38398909 |
| chr13 | 38410309 | 38410617 |
| chr13 | 38410617 | 38410940 |
| chr13 | 38411492 | 38411720 |
| chr13 | 38412587 | 38412843 |
| chr13 | 38419801 | 38420090 |



|       |          |          |
|-------|----------|----------|
| chr13 | 38422528 | 38422949 |
| chr13 | 38424483 | 38424682 |
| chr13 | 38426903 | 38427163 |
| chr13 | 38427163 | 38427647 |
| chr13 | 38438020 | 38438205 |
| chr13 | 38450285 | 38450632 |
| chr13 | 38450632 | 38451124 |
| chr13 | 38454371 | 38454638 |
| chr13 | 38482168 | 38482416 |
| chr13 | 38505732 | 38505933 |
| chr13 | 38506380 | 38506634 |
| chr13 | 38515539 | 38515736 |
| chr13 | 38515965 | 38516115 |
| chr13 | 38527603 | 38527864 |
| chr13 | 38527864 | 38528253 |
| chr13 | 38528253 | 38528693 |
| chr13 | 38535424 | 38536222 |
| chr13 | 38554668 | 38554925 |
| chr13 | 38565591 | 38565754 |
| chr13 | 38574726 | 38574991 |
| chr13 | 38580608 | 38581085 |
| chr13 | 38589632 | 38589784 |
| chr13 | 38598480 | 38598789 |
| chr13 | 38603041 | 38603310 |
| chr13 | 38618333 | 38618487 |
| chr13 | 38634304 | 38634501 |
| chr13 | 38634531 | 38635014 |
| chr13 | 38635014 | 38635360 |
| chr13 | 38658461 | 38658826 |
| chr13 | 38658826 | 38659299 |
| chr13 | 38668588 | 38668817 |
| chr13 | 38710011 | 38710286 |
| chr13 | 38736360 | 38736986 |
| chr13 | 38759139 | 38759296 |
| chr13 | 38761514 | 38761690 |
| chr13 | 38786168 | 38786526 |
| chr13 | 38793574 | 38793790 |
| chr13 | 38850058 | 38850341 |
| chr13 | 38914888 | 38915195 |
| chr13 | 38957999 | 38958177 |
| chr13 | 38960035 | 38960354 |
| chr13 | 38960354 | 38960721 |

|       |          |          |
|-------|----------|----------|
| chr13 | 38960721 | 38961040 |
| chr13 | 38967187 | 38967377 |
| chr13 | 38971090 | 38971407 |
| chr13 | 38999127 | 38999281 |
| chr13 | 39010362 | 39010607 |
| chr13 | 39011717 | 39012147 |
| chr13 | 39163406 | 39163574 |
| chr13 | 39226923 | 39227141 |
| chr13 | 39252663 | 39252940 |
| chr13 | 39361592 | 39361826 |
| chr13 | 39441015 | 39441185 |
| chr13 | 39698332 | 39698542 |
| chr13 | 39787562 | 39787733 |
| chr13 | 39798924 | 39799140 |
| chr13 | 39836184 | 39836376 |
| chr13 | 39849050 | 39849210 |
| chr13 | 39849412 | 39849851 |
| chr13 | 39851873 | 39852194 |
| chr13 | 39865299 | 39865623 |
| chr13 | 39898523 | 39898679 |
| chr13 | 39898679 | 39898832 |
| chr13 | 39919662 | 39919868 |
| chr13 | 39923152 | 39923461 |
| chr13 | 39929438 | 39929623 |
| chr13 | 39970874 | 39971146 |
| chr13 | 40000142 | 40000351 |
| chr13 | 40043998 | 40044221 |
| chr13 | 40137160 | 40137422 |
| chr13 | 40139117 | 40139377 |
| chr13 | 40166301 | 40166587 |
| chr13 | 40166587 | 40166867 |
| chr13 | 40182446 | 40182649 |
| chr13 | 40182649 | 40182832 |
| chr13 | 40232728 | 40232918 |
| chr13 | 40233035 | 40233205 |
| chr13 | 40321131 | 40321360 |
| chr13 | 40360698 | 40361059 |
| chr13 | 40361391 | 40361645 |
| chr13 | 40361686 | 40361884 |
| chr13 | 40368651 | 40368832 |
| chr13 | 40460477 | 40460714 |
| chr13 | 40463104 | 40463275 |

|       |          |          |
|-------|----------|----------|
| chr13 | 40463412 | 40463580 |
| chr13 | 40472602 | 40473141 |
| chr13 | 40473258 | 40473443 |
| chr13 | 40564641 | 40564801 |
| chr13 | 40569495 | 40569767 |
| chr13 | 40577386 | 40577577 |
| chr13 | 40597024 | 40597221 |
| chr13 | 40635934 | 40636315 |
| chr13 | 40637286 | 40637798 |
| chr13 | 40638563 | 40638788 |
| chr13 | 40639717 | 40640015 |
| chr13 | 40651139 | 40651350 |
| chr13 | 40656113 | 40656382 |
| chr13 | 40656382 | 40656698 |
| chr13 | 40659538 | 40659952 |
| chr13 | 40659952 | 40660278 |
| chr13 | 40660278 | 40660650 |
| chr13 | 40663527 | 40663917 |
| chr13 | 40669228 | 40669378 |
| chr13 | 40683559 | 40684194 |
| chr13 | 40704000 | 40704172 |
| chr13 | 40719091 | 40719421 |
| chr13 | 40722533 | 40722975 |
| chr13 | 40722975 | 40723482 |
| chr13 | 40730645 | 40730929 |
| chr13 | 40730929 | 40731211 |
| chr13 | 40731211 | 40731521 |
| chr13 | 40731521 | 40731861 |
| chr13 | 40732897 | 40733201 |
| chr13 | 40733675 | 40734148 |
| chr13 | 40749218 | 40749329 |
| chr13 | 40749329 | 40749374 |
| chr13 | 40774831 | 40774981 |
| chr13 | 40784114 | 40784362 |
| chr13 | 40843485 | 40843750 |
| chr13 | 40843799 | 40843980 |
| chr13 | 40854544 | 40854852 |
| chr13 | 40859580 | 40860324 |
| chr13 | 40868086 | 40868276 |
| chr13 | 40868558 | 40869473 |
| chr13 | 40877961 | 40878140 |
| chr13 | 40879278 | 40879561 |

|       |          |          |
|-------|----------|----------|
| chr13 | 40900718 | 40900891 |
| chr13 | 40904110 | 40904411 |
| chr13 | 40913721 | 40913997 |
| chr13 | 40916518 | 40916915 |
| chr13 | 40916915 | 40917343 |
| chr13 | 40917395 | 40917799 |
| chr13 | 40921279 | 40921691 |
| chr13 | 40921691 | 40921965 |
| chr13 | 40929010 | 40929169 |
| chr13 | 40930449 | 40930816 |
| chr13 | 40931815 | 40932205 |
| chr13 | 40937755 | 40937921 |
| chr13 | 40941435 | 40941587 |
| chr13 | 40953548 | 40953698 |
| chr13 | 40955663 | 40955871 |
| chr13 | 40971238 | 40971645 |
| chr13 | 40977698 | 40977919 |
| chr13 | 40982761 | 40983194 |
| chr13 | 40985851 | 40986154 |
| chr13 | 40986154 | 40986423 |
| chr13 | 41000097 | 41000371 |
| chr13 | 41000371 | 41000625 |
| chr13 | 41000625 | 41000851 |
| chr13 | 41000851 | 41001107 |
| chr13 | 41001107 | 41001561 |
| chr13 | 41002112 | 41002286 |
| chr13 | 41009116 | 41009266 |
| chr13 | 41015916 | 41016407 |
| chr13 | 41016407 | 41016733 |
| chr13 | 41016870 | 41017081 |
| chr13 | 41033313 | 41033615 |
| chr13 | 41045928 | 41046226 |
| chr13 | 41054863 | 41055111 |
| chr13 | 41076727 | 41076930 |
| chr13 | 41077223 | 41077488 |
| chr13 | 41079137 | 41079843 |
| chr13 | 41220014 | 41220812 |
| chr13 | 41238174 | 41238341 |
| chr13 | 41249545 | 41249917 |
| chr13 | 41249917 | 41250297 |
| chr13 | 41250297 | 41250592 |
| chr13 | 41280772 | 41281010 |

|       |          |          |
|-------|----------|----------|
| chr13 | 41282355 | 41282531 |
| chr13 | 41283275 | 41283707 |
| chr13 | 41284548 | 41284787 |
| chr13 | 41285446 | 41285814 |
| chr13 | 41300123 | 41300385 |
| chr13 | 41300731 | 41300944 |
| chr13 | 41302726 | 41302998 |
| chr13 | 41314095 | 41314311 |
| chr13 | 41321268 | 41321852 |
| chr13 | 41330955 | 41331193 |
| chr13 | 41331193 | 41331413 |
| chr13 | 41331698 | 41332284 |
| chr13 | 41334719 | 41334927 |
| chr13 | 41336223 | 41336405 |
| chr13 | 41338002 | 41338287 |
| chr13 | 41339317 | 41340159 |
| chr13 | 41345759 | 41345964 |
| chr13 | 41345964 | 41346131 |
| chr13 | 41349737 | 41349902 |
| chr13 | 41352106 | 41352324 |
| chr13 | 41352324 | 41352743 |
| chr13 | 41355676 | 41355866 |
| chr13 | 41358467 | 41358805 |
| chr13 | 41358805 | 41359227 |
| chr13 | 41366774 | 41367135 |
| chr13 | 41367135 | 41367714 |
| chr13 | 41381934 | 41382124 |
| chr13 | 41384502 | 41384807 |
| chr13 | 41384978 | 41385242 |
| chr13 | 41386569 | 41386746 |
| chr13 | 41386746 | 41386925 |
| chr13 | 41401739 | 41402078 |
| chr13 | 41403796 | 41404409 |
| chr13 | 41405059 | 41405510 |
| chr13 | 41410271 | 41410555 |
| chr13 | 41416066 | 41416440 |
| chr13 | 41419029 | 41419340 |
| chr13 | 41419340 | 41419590 |
| chr13 | 41423842 | 41424018 |
| chr13 | 41445947 | 41446149 |
| chr13 | 41453301 | 41454012 |
| chr13 | 41457827 | 41457982 |

|       |          |          |
|-------|----------|----------|
| chr13 | 41469442 | 41469923 |
| chr13 | 41471421 | 41471796 |
| chr13 | 41476214 | 41476599 |
| chr13 | 41476604 | 41477214 |
| chr13 | 41519864 | 41520172 |
| chr13 | 41530716 | 41530998 |
| chr13 | 41531636 | 41531786 |
| chr13 | 41532673 | 41533002 |
| chr13 | 41569821 | 41570058 |
| chr13 | 41572068 | 41572309 |
| chr13 | 41583895 | 41584078 |
| chr13 | 41605182 | 41605465 |
| chr13 | 41605465 | 41605774 |
| chr13 | 41605774 | 41606166 |
| chr13 | 41606166 | 41606518 |
| chr13 | 41606522 | 41606760 |
| chr13 | 41608631 | 41608814 |
| chr13 | 41612060 | 41612417 |
| chr13 | 41622489 | 41622639 |
| chr13 | 41622788 | 41623005 |
| chr13 | 41623030 | 41623395 |
| chr13 | 41624243 | 41624416 |
| chr13 | 41634269 | 41634621 |
| chr13 | 41634621 | 41634883 |
| chr13 | 41642961 | 41643187 |
| chr13 | 41643433 | 41643622 |
| chr13 | 41643648 | 41644233 |
| chr13 | 41650785 | 41651006 |
| chr13 | 41651706 | 41652152 |
| chr13 | 41653923 | 41654156 |
| chr13 | 41662101 | 41662482 |
| chr13 | 41662482 | 41662782 |
| chr13 | 41662782 | 41663255 |
| chr13 | 41673699 | 41674058 |
| chr13 | 41679430 | 41679603 |
| chr13 | 41680855 | 41681170 |
| chr13 | 41683691 | 41683914 |
| chr13 | 41705420 | 41706151 |
| chr13 | 41709164 | 41709314 |
| chr13 | 41709578 | 41709735 |
| chr13 | 41747030 | 41747241 |
| chr13 | 41748962 | 41749199 |

|       |          |          |
|-------|----------|----------|
| chr13 | 41750611 | 41750852 |
| chr13 | 41773787 | 41774195 |
| chr13 | 41784950 | 41785201 |
| chr13 | 41785201 | 41785431 |
| chr13 | 41785431 | 41785697 |
| chr13 | 41801112 | 41801347 |
| chr13 | 41801402 | 41801690 |
| chr13 | 41802891 | 41803246 |
| chr13 | 41803925 | 41804294 |
| chr13 | 41805553 | 41805741 |
| chr13 | 41820058 | 41820253 |
| chr13 | 41820998 | 41821259 |
| chr13 | 41823197 | 41823489 |
| chr13 | 41827576 | 41827889 |
| chr13 | 41831024 | 41831179 |
| chr13 | 41846612 | 41846830 |
| chr13 | 41847432 | 41847781 |
| chr13 | 41847781 | 41848173 |
| chr13 | 41848497 | 41848647 |
| chr13 | 41925696 | 41925966 |
| chr13 | 41929613 | 41930140 |
| chr13 | 41930949 | 41931231 |
| chr13 | 41940850 | 41941021 |
| chr13 | 41941066 | 41941336 |
| chr13 | 41941336 | 41941559 |
| chr13 | 41941559 | 41941830 |
| chr13 | 41980129 | 41980281 |
| chr13 | 41988415 | 41988636 |
| chr13 | 42035282 | 42035547 |
| chr13 | 42049453 | 42049769 |
| chr13 | 42051164 | 42051441 |
| chr13 | 42051492 | 42051919 |
| chr13 | 42051919 | 42052237 |
| chr13 | 42052237 | 42052588 |
| chr13 | 42052588 | 42053019 |
| chr13 | 42053069 | 42053224 |
| chr13 | 42064330 | 42064667 |
| chr13 | 42064768 | 42065122 |
| chr13 | 42066032 | 42066324 |
| chr13 | 42067029 | 42067251 |
| chr13 | 42073217 | 42073629 |
| chr13 | 42073849 | 42074182 |

|       |          |          |
|-------|----------|----------|
| chr13 | 42077658 | 42077851 |
| chr13 | 42088273 | 42088835 |
| chr13 | 42090616 | 42090947 |
| chr13 | 42094701 | 42094852 |
| chr13 | 42095228 | 42095515 |
| chr13 | 42101455 | 42101765 |
| chr13 | 42102982 | 42103420 |
| chr13 | 42108304 | 42109014 |
| chr13 | 42109257 | 42109662 |
| chr13 | 42130713 | 42131061 |
| chr13 | 42131629 | 42131831 |
| chr13 | 42144741 | 42144900 |
| chr13 | 42152785 | 42153028 |
| chr13 | 42153028 | 42153242 |
| chr13 | 42155931 | 42156283 |
| chr13 | 42175101 | 42175323 |
| chr13 | 42221766 | 42221975 |
| chr13 | 42228864 | 42229194 |
| chr13 | 42233852 | 42234086 |
| chr13 | 42234086 | 42234342 |
| chr13 | 42234342 | 42234681 |
| chr13 | 42238290 | 42238910 |
| chr13 | 42244284 | 42244642 |
| chr13 | 42244642 | 42245055 |
| chr13 | 42245698 | 42245972 |
| chr13 | 42255145 | 42255575 |
| chr13 | 42260647 | 42260964 |
| chr13 | 42260964 | 42261283 |
| chr13 | 42261802 | 42262040 |
| chr13 | 42265765 | 42266332 |
| chr13 | 42276660 | 42276998 |
| chr13 | 42277117 | 42277389 |
| chr13 | 42277597 | 42277811 |
| chr13 | 42277811 | 42278101 |
| chr13 | 42278128 | 42278671 |
| chr13 | 42278681 | 42278953 |
| chr13 | 42285835 | 42286266 |
| chr13 | 42286363 | 42286644 |
| chr13 | 42298880 | 42299072 |
| chr13 | 42299459 | 42299629 |
| chr13 | 42299699 | 42299942 |
| chr13 | 42300604 | 42300918 |



|       |          |          |
|-------|----------|----------|
| chr13 | 42301121 | 42301771 |
| chr13 | 42302320 | 42302587 |
| chr13 | 42302691 | 42302861 |
| chr13 | 42303625 | 42303845 |
| chr13 | 42307048 | 42307319 |
| chr13 | 42308374 | 42308597 |
| chr13 | 42310468 | 42310808 |
| chr13 | 42310808 | 42311130 |
| chr13 | 42317882 | 42318082 |
| chr13 | 42322801 | 42323136 |
| chr13 | 42323136 | 42323663 |
| chr13 | 42328440 | 42328925 |
| chr13 | 42329172 | 42329447 |
| chr13 | 42351522 | 42352322 |
| chr13 | 42357704 | 42358231 |
| chr13 | 42358545 | 42358926 |
| chr13 | 42361250 | 42361405 |
| chr13 | 42374189 | 42374654 |
| chr13 | 42374694 | 42374961 |
| chr13 | 42376129 | 42376418 |
| chr13 | 42383162 | 42383449 |
| chr13 | 42390068 | 42390312 |
| chr13 | 42390424 | 42390723 |
| chr13 | 42394491 | 42394775 |
| chr13 | 42398297 | 42398657 |
| chr13 | 42424544 | 42424723 |
| chr13 | 42424744 | 42424907 |
| chr13 | 42430401 | 42430674 |
| chr13 | 42436686 | 42436877 |
| chr13 | 42447011 | 42447237 |
| chr13 | 42457885 | 42458113 |
| chr13 | 42495168 | 42495426 |
| chr13 | 42538270 | 42538420 |
| chr13 | 42544798 | 42545182 |
| chr13 | 42548302 | 42548562 |
| chr13 | 42548615 | 42548963 |
| chr13 | 42548974 | 42549194 |
| chr13 | 42549203 | 42549542 |
| chr13 | 42553755 | 42553909 |
| chr13 | 42554960 | 42555279 |
| chr13 | 42557976 | 42558265 |
| chr13 | 42558573 | 42558830 |

|       |          |          |
|-------|----------|----------|
| chr13 | 42565123 | 42565451 |
| chr13 | 42569721 | 42569983 |
| chr13 | 42570558 | 42570921 |
| chr13 | 42574231 | 42574427 |
| chr13 | 42586286 | 42586651 |
| chr13 | 42586937 | 42587147 |
| chr13 | 42587147 | 42587393 |
| chr13 | 42589712 | 42589879 |
| chr13 | 42592983 | 42593304 |
| chr13 | 42600104 | 42600429 |
| chr13 | 42602035 | 42602195 |
| chr13 | 42607144 | 42607483 |
| chr13 | 42617896 | 42618111 |
| chr13 | 42651894 | 42652206 |
| chr13 | 42657056 | 42657299 |
| chr13 | 42689703 | 42690033 |
| chr13 | 42724124 | 42724324 |
| chr13 | 42749410 | 42749587 |
| chr13 | 42792388 | 42792595 |
| chr13 | 42818466 | 42818630 |
| chr13 | 42822627 | 42822896 |
| chr13 | 42866737 | 42866962 |
| chr13 | 42916439 | 42916594 |
| chr13 | 42961565 | 42961846 |
| chr13 | 43004118 | 43004467 |
| chr13 | 43032258 | 43032755 |
| chr13 | 43032755 | 43032987 |
| chr13 | 43042865 | 43043084 |
| chr13 | 43068662 | 43069079 |
| chr13 | 43069079 | 43069333 |
| chr13 | 43069333 | 43069564 |
| chr13 | 43085251 | 43085582 |
| chr13 | 43085582 | 43085827 |
| chr13 | 43086167 | 43086317 |
| chr13 | 43148706 | 43149057 |
| chr13 | 43149509 | 43150082 |
| chr13 | 43154104 | 43154391 |
| chr13 | 43159601 | 43159779 |
| chr13 | 43171097 | 43171370 |
| chr13 | 43171370 | 43171780 |
| chr13 | 43172169 | 43172347 |
| chr13 | 43172364 | 43172739 |

|       |          |          |
|-------|----------|----------|
| chr13 | 43173330 | 43173606 |
| chr13 | 43181115 | 43181349 |
| chr13 | 43182175 | 43182407 |
| chr13 | 43182407 | 43182662 |
| chr13 | 43182976 | 43183200 |
| chr13 | 43183261 | 43183417 |
| chr13 | 43183773 | 43184029 |
| chr13 | 43193014 | 43193258 |
| chr13 | 43193258 | 43193756 |
| chr13 | 43201092 | 43201407 |
| chr13 | 43202431 | 43202729 |
| chr13 | 43205604 | 43205824 |
| chr13 | 43211025 | 43211265 |
| chr13 | 43212175 | 43212785 |
| chr13 | 43222461 | 43222885 |
| chr13 | 43231923 | 43232482 |
| chr13 | 43234918 | 43235109 |
| chr13 | 43241815 | 43242105 |
| chr13 | 43243272 | 43243591 |
| chr13 | 43261293 | 43261518 |
| chr13 | 43261518 | 43261757 |
| chr13 | 43261757 | 43262068 |
| chr13 | 43262068 | 43262403 |
| chr13 | 43262403 | 43262712 |
| chr13 | 43263676 | 43263992 |
| chr13 | 43268924 | 43269397 |
| chr13 | 43271512 | 43271972 |
| chr13 | 43274913 | 43275238 |
| chr13 | 43277574 | 43277779 |
| chr13 | 43284361 | 43284521 |
| chr13 | 43284696 | 43284957 |
| chr13 | 43284957 | 43285215 |
| chr13 | 43286836 | 43287178 |
| chr13 | 43292846 | 43293393 |
| chr13 | 43293871 | 43294068 |
| chr13 | 43296578 | 43296760 |
| chr13 | 43297671 | 43298112 |
| chr13 | 43303359 | 43303578 |
| chr13 | 43303578 | 43303797 |
| chr13 | 43303797 | 43304090 |
| chr13 | 43304090 | 43304578 |
| chr13 | 43304730 | 43305051 |

|       |          |          |
|-------|----------|----------|
| chr13 | 43306573 | 43306956 |
| chr13 | 43317439 | 43317824 |
| chr13 | 43319428 | 43319731 |
| chr13 | 43319731 | 43319946 |
| chr13 | 43326499 | 43326776 |
| chr13 | 43349227 | 43349469 |
| chr13 | 43349469 | 43349753 |
| chr13 | 43365098 | 43365340 |
| chr13 | 43365340 | 43365960 |
| chr13 | 43365982 | 43366178 |
| chr13 | 43379436 | 43379704 |
| chr13 | 43398150 | 43398522 |
| chr13 | 43398522 | 43398775 |
| chr13 | 43398775 | 43399036 |
| chr13 | 43411763 | 43412068 |
| chr13 | 43412068 | 43412356 |
| chr13 | 43412356 | 43412602 |
| chr13 | 43434839 | 43435139 |
| chr13 | 43464730 | 43464919 |
| chr13 | 43469164 | 43469454 |
| chr13 | 43471553 | 43471811 |
| chr13 | 43478604 | 43479011 |
| chr13 | 43480098 | 43480281 |
| chr13 | 43480281 | 43480482 |
| chr13 | 43480482 | 43480722 |
| chr13 | 43480848 | 43481166 |
| chr13 | 43481166 | 43481698 |
| chr13 | 43488574 | 43488903 |
| chr13 | 43493004 | 43493154 |
| chr13 | 43493332 | 43493774 |
| chr13 | 43493854 | 43494110 |
| chr13 | 43501676 | 43501910 |
| chr13 | 43506807 | 43506957 |
| chr13 | 43524771 | 43525398 |
| chr13 | 43525431 | 43525614 |
| chr13 | 43531410 | 43531732 |
| chr13 | 43535449 | 43535637 |
| chr13 | 43546922 | 43547162 |
| chr13 | 43559591 | 43560091 |
| chr13 | 43560091 | 43560498 |
| chr13 | 43565443 | 43565694 |
| chr13 | 43579787 | 43580080 |

|       |          |          |
|-------|----------|----------|
| chr13 | 43592979 | 43593166 |
| chr13 | 43595896 | 43596152 |
| chr13 | 43602497 | 43602774 |
| chr13 | 43615621 | 43616312 |
| chr13 | 43629782 | 43630134 |
| chr13 | 43725762 | 43726042 |
| chr13 | 43739711 | 43739965 |
| chr13 | 43773926 | 43774517 |
| chr13 | 43774785 | 43774973 |
| chr13 | 43775099 | 43775483 |
| chr13 | 43785013 | 43785264 |
| chr13 | 43864405 | 43864960 |
| chr13 | 43991919 | 43992118 |
| chr13 | 43993072 | 43993293 |
| chr13 | 44085521 | 44086042 |
| chr13 | 44087056 | 44087362 |
| chr13 | 44130527 | 44130693 |
| chr13 | 44176203 | 44176359 |
| chr13 | 44185115 | 44185335 |
| chr13 | 44280393 | 44280634 |
| chr13 | 44301933 | 44302322 |
| chr13 | 44306297 | 44306497 |
| chr13 | 44315353 | 44315503 |
| chr13 | 44455301 | 44455554 |
| chr13 | 44622816 | 44622992 |
| chr13 | 44642148 | 44642326 |
| chr13 | 44642379 | 44642859 |
| chr13 | 44659818 | 44660227 |
| chr13 | 44660227 | 44660526 |
| chr13 | 44673415 | 44673869 |
| chr13 | 44673869 | 44674128 |
| chr13 | 44674128 | 44674380 |
| chr13 | 44674660 | 44674848 |
| chr13 | 44704143 | 44704310 |
| chr13 | 44730163 | 44730461 |
| chr13 | 44730461 | 44730813 |
| chr13 | 44730813 | 44731098 |
| chr13 | 44731185 | 44731412 |
| chr13 | 44733372 | 44733797 |
| chr13 | 44733797 | 44734222 |
| chr13 | 44758827 | 44759037 |
| chr13 | 44770880 | 44771262 |

|       |          |          |
|-------|----------|----------|
| chr13 | 44775762 | 44776147 |
| chr13 | 44781219 | 44781436 |
| chr13 | 44784561 | 44784782 |
| chr13 | 44784782 | 44784936 |
| chr13 | 44784936 | 44785161 |
| chr13 | 44786353 | 44786662 |
| chr13 | 44804964 | 44805131 |
| chr13 | 44833485 | 44833682 |
| chr13 | 44839975 | 44840162 |
| chr13 | 44845787 | 44845987 |
| chr13 | 44859268 | 44859549 |
| chr13 | 44869494 | 44869785 |
| chr13 | 44869785 | 44870094 |
| chr13 | 44904202 | 44904898 |
| chr13 | 44916033 | 44916251 |
| chr13 | 44917269 | 44917504 |
| chr13 | 44924071 | 44924491 |
| chr13 | 44939205 | 44939670 |
| chr13 | 44939705 | 44939972 |
| chr13 | 44940467 | 44940869 |
| chr13 | 44943417 | 44943633 |
| chr13 | 44968650 | 44969055 |
| chr13 | 44971439 | 44971755 |
| chr13 | 44971755 | 44972296 |
| chr13 | 44977946 | 44978096 |
| chr13 | 44985502 | 44985713 |
| chr13 | 44985713 | 44985913 |
| chr13 | 44990150 | 44990335 |
| chr13 | 45000885 | 45001157 |
| chr13 | 45001164 | 45001591 |
| chr13 | 45001591 | 45001921 |
| chr13 | 45001921 | 45002456 |
| chr13 | 45005024 | 45005341 |
| chr13 | 45030845 | 45031170 |
| chr13 | 45078770 | 45078973 |
| chr13 | 45078973 | 45079144 |
| chr13 | 45097986 | 45098136 |
| chr13 | 45387316 | 45387592 |
| chr13 | 45389395 | 45389809 |
| chr13 | 45389809 | 45390260 |
| chr13 | 45390262 | 45390455 |
| chr13 | 45398568 | 45398736 |

|       |          |          |
|-------|----------|----------|
| chr13 | 45402327 | 45402714 |
| chr13 | 45402714 | 45403039 |
| chr13 | 45507222 | 45507772 |
| chr13 | 45507772 | 45508077 |
| chr13 | 45508658 | 45508889 |
| chr13 | 45509320 | 45509581 |
| chr13 | 45512543 | 45512861 |
| chr13 | 45512933 | 45513509 |
| chr13 | 45515292 | 45515484 |
| chr13 | 45516778 | 45517153 |
| chr13 | 45521615 | 45521866 |
| chr13 | 45530754 | 45531077 |
| chr13 | 45538747 | 45538942 |
| chr13 | 45538942 | 45539206 |
| chr13 | 45539287 | 45539737 |
| chr13 | 45546958 | 45547140 |
| chr13 | 45560638 | 45560849 |
| chr13 | 45562057 | 45562286 |
| chr13 | 45569942 | 45570374 |
| chr13 | 45571780 | 45571992 |
| chr13 | 45577909 | 45578073 |
| chr13 | 45578282 | 45578627 |
| chr13 | 45613435 | 45613661 |
| chr13 | 45614841 | 45615239 |
| chr13 | 45623773 | 45623929 |
| chr13 | 45627009 | 45627442 |
| chr13 | 45627442 | 45627726 |
| chr13 | 45647253 | 45647635 |
| chr13 | 45649303 | 45649710 |
| chr13 | 45657684 | 45657972 |
| chr13 | 45657972 | 45658295 |
| chr13 | 45658295 | 45658664 |
| chr13 | 45667141 | 45667420 |
| chr13 | 45684281 | 45684536 |
| chr13 | 45684591 | 45685148 |
| chr13 | 45685148 | 45685543 |
| chr13 | 45694849 | 45695586 |
| chr13 | 45706667 | 45707046 |
| chr13 | 45707046 | 45707411 |
| chr13 | 45707766 | 45708060 |
| chr13 | 45711122 | 45711304 |
| chr13 | 45718637 | 45719432 |

|       |          |          |
|-------|----------|----------|
| chr13 | 45744949 | 45745177 |
| chr13 | 45748596 | 45749112 |
| chr13 | 45750020 | 45750206 |
| chr13 | 45751187 | 45751581 |
| chr13 | 45792678 | 45792857 |
| chr13 | 45796284 | 45796686 |
| chr13 | 45803160 | 45803594 |
| chr13 | 45803618 | 45803830 |
| chr13 | 45806310 | 45806625 |
| chr13 | 45806625 | 45806875 |
| chr13 | 45820406 | 45820832 |
| chr13 | 45820832 | 45821223 |
| chr13 | 45821310 | 45821543 |
| chr13 | 45827412 | 45827619 |
| chr13 | 45827619 | 45827956 |
| chr13 | 45827956 | 45828478 |
| chr13 | 45829109 | 45829311 |
| chr13 | 45829432 | 45829686 |
| chr13 | 45837571 | 45837961 |
| chr13 | 45839709 | 45840330 |
| chr13 | 45850186 | 45850558 |
| chr13 | 45850558 | 45850949 |
| chr13 | 45851888 | 45852058 |
| chr13 | 45857430 | 45857666 |
| chr13 | 45867316 | 45867773 |
| chr13 | 45872188 | 45872483 |
| chr13 | 45883075 | 45883496 |
| chr13 | 45884976 | 45885213 |
| chr13 | 45906323 | 45906813 |
| chr13 | 45906852 | 45907179 |
| chr13 | 45907179 | 45907388 |
| chr13 | 45907435 | 45907848 |
| chr13 | 45908445 | 45908664 |
| chr13 | 45911914 | 45912380 |
| chr13 | 45915125 | 45915303 |
| chr13 | 45917326 | 45917641 |
| chr13 | 45922557 | 45922958 |
| chr13 | 45922981 | 45923499 |
| chr13 | 45924662 | 45924882 |
| chr13 | 45925390 | 45925581 |
| chr13 | 45928386 | 45928677 |
| chr13 | 45928677 | 45928982 |



|       |          |          |
|-------|----------|----------|
| chr13 | 45931183 | 45931480 |
| chr13 | 45938698 | 45938987 |
| chr13 | 45942457 | 45942607 |
| chr13 | 45963453 | 45963789 |
| chr13 | 45963789 | 45964133 |
| chr13 | 45964497 | 45964669 |
| chr13 | 45964848 | 45965244 |
| chr13 | 45965244 | 45965554 |
| chr13 | 45965554 | 45965819 |
| chr13 | 45965819 | 45966154 |
| chr13 | 45966154 | 45966495 |
| chr13 | 45966626 | 45966831 |
| chr13 | 45971186 | 45971547 |
| chr13 | 45974688 | 45975103 |
| chr13 | 45976921 | 45977259 |
| chr13 | 46011325 | 46011565 |
| chr13 | 46030818 | 46031025 |
| chr13 | 46043509 | 46044090 |
| chr13 | 46044990 | 46045333 |
| chr13 | 46047028 | 46047263 |
| chr13 | 46047289 | 46047663 |
| chr13 | 46054504 | 46054691 |
| chr13 | 46097056 | 46097267 |
| chr13 | 46161199 | 46161627 |
| chr13 | 46161627 | 46161976 |
| chr13 | 46161976 | 46162342 |
| chr13 | 46166598 | 46166855 |
| chr13 | 46255773 | 46255934 |
| chr13 | 46257937 | 46258125 |
| chr13 | 46271267 | 46271417 |
| chr13 | 46626711 | 46626863 |
| chr13 | 46662592 | 46662779 |
| chr13 | 46669013 | 46669336 |
| chr13 | 46669336 | 46669705 |
| chr13 | 46669705 | 46670370 |
| chr13 | 46674715 | 46674981 |
| chr13 | 46683430 | 46683709 |
| chr13 | 46690613 | 46690876 |
| chr13 | 46690876 | 46691084 |
| chr13 | 46691146 | 46691380 |
| chr13 | 46696809 | 46697266 |
| chr13 | 46703247 | 46703407 |

|       |          |          |
|-------|----------|----------|
| chr13 | 46716009 | 46716484 |
| chr13 | 46726517 | 46726756 |
| chr13 | 46727082 | 46727576 |
| chr13 | 46727576 | 46728000 |
| chr13 | 46728000 | 46728257 |
| chr13 | 46735566 | 46735778 |
| chr13 | 46735778 | 46736018 |
| chr13 | 46736018 | 46736241 |
| chr13 | 46736241 | 46736476 |
| chr13 | 46736476 | 46736700 |
| chr13 | 46736700 | 46736987 |
| chr13 | 46742448 | 46742736 |
| chr13 | 46745030 | 46745393 |
| chr13 | 46748552 | 46748726 |
| chr13 | 46776995 | 46777201 |
| chr13 | 46788400 | 46788617 |
| chr13 | 46788617 | 46788810 |
| chr13 | 46798241 | 46798467 |
| chr13 | 46810199 | 46810444 |
| chr13 | 46812542 | 46812842 |
| chr13 | 46812842 | 46813272 |
| chr13 | 46838714 | 46838864 |
| chr13 | 46840635 | 46841076 |
| chr13 | 46842158 | 46842708 |
| chr13 | 46849594 | 46849744 |
| chr13 | 46883418 | 46883803 |
| chr13 | 46888330 | 46888633 |
| chr13 | 46907792 | 46908226 |
| chr13 | 46908279 | 46908439 |
| chr13 | 46908979 | 46909429 |
| chr13 | 46928929 | 46929156 |
| chr13 | 46929160 | 46929535 |
| chr13 | 46929629 | 46930038 |
| chr13 | 46930038 | 46930366 |
| chr13 | 46930366 | 46930717 |
| chr13 | 46930717 | 46931089 |
| chr13 | 46937101 | 46937322 |
| chr13 | 46955836 | 46955987 |
| chr13 | 46959087 | 46959584 |
| chr13 | 46976027 | 46976282 |
| chr13 | 46983839 | 46984261 |
| chr13 | 46986239 | 46986697 |

|       |          |          |
|-------|----------|----------|
| chr13 | 47014255 | 47014685 |
| chr13 | 47014685 | 47015170 |
| chr13 | 47017365 | 47017608 |
| chr13 | 47042987 | 47043392 |
| chr13 | 47043392 | 47043749 |
| chr13 | 47043749 | 47044073 |
| chr13 | 47063053 | 47063524 |
| chr13 | 47081007 | 47081240 |
| chr13 | 47089353 | 47089631 |
| chr13 | 47105653 | 47106060 |
| chr13 | 47106060 | 47106455 |
| chr13 | 47106455 | 47106785 |
| chr13 | 47112786 | 47112962 |
| chr13 | 47121858 | 47122071 |
| chr13 | 47122528 | 47122754 |
| chr13 | 47122754 | 47122975 |
| chr13 | 47124564 | 47124726 |
| chr13 | 47152400 | 47152668 |
| chr13 | 47162036 | 47162329 |
| chr13 | 47170872 | 47171237 |
| chr13 | 47171237 | 47171661 |
| chr13 | 47178182 | 47178505 |
| chr13 | 47193559 | 47194288 |
| chr13 | 47194334 | 47194610 |
| chr13 | 47194623 | 47195130 |
| chr13 | 47195220 | 47195371 |
| chr13 | 47212999 | 47213528 |
| chr13 | 47213815 | 47214224 |
| chr13 | 47216293 | 47216561 |
| chr13 | 47217048 | 47217458 |
| chr13 | 47224175 | 47224417 |
| chr13 | 47262082 | 47262273 |
| chr13 | 47272766 | 47272968 |
| chr13 | 47272968 | 47273327 |
| chr13 | 47273327 | 47273757 |
| chr13 | 47288499 | 47288788 |
| chr13 | 47301139 | 47301342 |
| chr13 | 47335834 | 47336069 |
| chr13 | 47336069 | 47336446 |
| chr13 | 47347957 | 47348145 |
| chr13 | 47391687 | 47391837 |
| chr13 | 47394472 | 47394745 |

|       |          |          |
|-------|----------|----------|
| chr13 | 47394981 | 47395224 |
| chr13 | 47462165 | 47462488 |
| chr13 | 47483339 | 47483538 |
| chr13 | 47502008 | 47502163 |
| chr13 | 47532957 | 47533339 |
| chr13 | 47667427 | 47667660 |
| chr13 | 47894372 | 47894684 |
| chr13 | 48026783 | 48027125 |
| chr13 | 48074458 | 48074608 |
| chr13 | 48074659 | 48074998 |
| chr13 | 48097433 | 48097935 |
| chr13 | 48104595 | 48105130 |
| chr13 | 48105130 | 48105390 |
| chr13 | 48109942 | 48110328 |
| chr13 | 48110338 | 48110623 |
| chr13 | 48110623 | 48110951 |
| chr13 | 48116097 | 48116288 |
| chr13 | 48120882 | 48121153 |
| chr13 | 48130916 | 48131107 |
| chr13 | 48138821 | 48139096 |
| chr13 | 48140649 | 48140842 |
| chr13 | 48193807 | 48194493 |
| chr13 | 48194532 | 48194840 |
| chr13 | 48195448 | 48195734 |
| chr13 | 48214174 | 48214324 |
| chr13 | 48227690 | 48228140 |
| chr13 | 48228140 | 48228431 |
| chr13 | 48233992 | 48234217 |
| chr13 | 48260668 | 48261235 |
| chr13 | 48261371 | 48261701 |
| chr13 | 48261701 | 48261962 |
| chr13 | 48261965 | 48262200 |
| chr13 | 48262200 | 48262390 |
| chr13 | 48273589 | 48273764 |
| chr13 | 48273767 | 48274064 |
| chr13 | 48314533 | 48314948 |
| chr13 | 48338568 | 48338813 |
| chr13 | 48398348 | 48398626 |
| chr13 | 48398658 | 48399002 |
| chr13 | 48437056 | 48437209 |
| chr13 | 48464358 | 48464530 |
| chr13 | 48475625 | 48475800 |

|       |          |          |
|-------|----------|----------|
| chr13 | 48490895 | 48491197 |
| chr13 | 48491442 | 48491863 |
| chr13 | 48492681 | 48492848 |
| chr13 | 48492964 | 48493192 |
| chr13 | 48493220 | 48493559 |
| chr13 | 48502155 | 48502445 |
| chr13 | 48502445 | 48502906 |
| chr13 | 48512970 | 48513289 |
| chr13 | 48513289 | 48513666 |
| chr13 | 48515946 | 48516174 |
| chr13 | 48528166 | 48528356 |
| chr13 | 48528395 | 48528599 |
| chr13 | 48528599 | 48528853 |
| chr13 | 48530728 | 48531089 |
| chr13 | 48531471 | 48531728 |
| chr13 | 48533467 | 48533854 |
| chr13 | 48539110 | 48539346 |
| chr13 | 48545533 | 48546275 |
| chr13 | 48546275 | 48546922 |
| chr13 | 48552164 | 48552498 |
| chr13 | 48552498 | 48552974 |
| chr13 | 48564894 | 48565196 |
| chr13 | 48566052 | 48566335 |
| chr13 | 48566335 | 48566602 |
| chr13 | 48567716 | 48568031 |
| chr13 | 48571226 | 48571672 |
| chr13 | 48572222 | 48572450 |
| chr13 | 48576634 | 48576854 |
| chr13 | 48587309 | 48587803 |
| chr13 | 48602575 | 48602733 |
| chr13 | 48602766 | 48603366 |
| chr13 | 48609052 | 48609654 |
| chr13 | 48614529 | 48614880 |
| chr13 | 48614904 | 48615054 |
| chr13 | 48625160 | 48625477 |
| chr13 | 48625477 | 48625794 |
| chr13 | 48625794 | 48626034 |
| chr13 | 48639654 | 48639905 |
| chr13 | 48641764 | 48641937 |
| chr13 | 48644242 | 48644413 |
| chr13 | 48653492 | 48653828 |
| chr13 | 48653860 | 48654106 |

|       |          |          |
|-------|----------|----------|
| chr13 | 48655610 | 48655931 |
| chr13 | 48656146 | 48656347 |
| chr13 | 48659995 | 48660145 |
| chr13 | 48662797 | 48663001 |
| chr13 | 48663213 | 48663386 |
| chr13 | 48665236 | 48665405 |
| chr13 | 48669021 | 48669210 |
| chr13 | 48669210 | 48669389 |
| chr13 | 48671705 | 48671895 |
| chr13 | 48674524 | 48674735 |
| chr13 | 48679140 | 48679299 |
| chr13 | 48679305 | 48679714 |
| chr13 | 48697020 | 48697176 |
| chr13 | 48697326 | 48697511 |
| chr13 | 48697517 | 48697830 |
| chr13 | 48711387 | 48711729 |
| chr13 | 48726536 | 48726734 |
| chr13 | 48727913 | 48728181 |
| chr13 | 48731625 | 48731960 |
| chr13 | 48732621 | 48732939 |
| chr13 | 48745201 | 48745445 |
| chr13 | 48748198 | 48748385 |
| chr13 | 48782882 | 48783050 |
| chr13 | 48797005 | 48797230 |
| chr13 | 48800756 | 48801180 |
| chr13 | 48801228 | 48801578 |
| chr13 | 48807448 | 48807725 |
| chr13 | 48809784 | 48809951 |
| chr13 | 48815686 | 48815891 |
| chr13 | 48822343 | 48822612 |
| chr13 | 48822822 | 48823040 |
| chr13 | 48832281 | 48832546 |
| chr13 | 48840661 | 48840892 |
| chr13 | 48841782 | 48842287 |
| chr13 | 48842317 | 48842731 |
| chr13 | 48852935 | 48853127 |
| chr13 | 48853996 | 48854341 |
| chr13 | 48857947 | 48858181 |
| chr13 | 48858875 | 48859094 |
| chr13 | 48861968 | 48862248 |
| chr13 | 48869603 | 48869901 |
| chr13 | 48869901 | 48870192 |

|       |          |          |
|-------|----------|----------|
| chr13 | 48870192 | 48870406 |
| chr13 | 48870420 | 48870643 |
| chr13 | 48870643 | 48870827 |
| chr13 | 48871058 | 48871250 |
| chr13 | 48871250 | 48871413 |
| chr13 | 48871596 | 48871824 |
| chr13 | 48871957 | 48872145 |
| chr13 | 48872804 | 48873109 |
| chr13 | 48873109 | 48873334 |
| chr13 | 48878401 | 48879105 |
| chr13 | 48890337 | 48890487 |
| chr13 | 48891710 | 48891954 |
| chr13 | 48906848 | 48907117 |
| chr13 | 48913738 | 48913928 |
| chr13 | 48921330 | 48921658 |
| chr13 | 48921658 | 48922020 |
| chr13 | 48922086 | 48922258 |
| chr13 | 48954968 | 48955138 |
| chr13 | 48962566 | 48962923 |
| chr13 | 48965577 | 48965928 |
| chr13 | 48966098 | 48966263 |
| chr13 | 48966836 | 48967010 |
| chr13 | 48967322 | 48967529 |
| chr13 | 48967529 | 48967809 |
| chr13 | 48967852 | 48968168 |
| chr13 | 48968168 | 48968428 |
| chr13 | 48968428 | 48968864 |
| chr13 | 48974760 | 48975046 |
| chr13 | 48979079 | 48979624 |
| chr13 | 48983844 | 48984013 |
| chr13 | 48990032 | 48990487 |
| chr13 | 48990487 | 48990749 |
| chr13 | 48996204 | 48996540 |
| chr13 | 48997420 | 48997604 |
| chr13 | 48998603 | 48998915 |
| chr13 | 49001077 | 49001396 |
| chr13 | 49013322 | 49013673 |
| chr13 | 49013673 | 49014006 |
| chr13 | 49020272 | 49020429 |
| chr13 | 49021758 | 49022018 |
| chr13 | 49024828 | 49025085 |
| chr13 | 49025601 | 49025756 |

|       |          |          |
|-------|----------|----------|
| chr13 | 49036567 | 49036759 |
| chr13 | 49047157 | 49047349 |
| chr13 | 49052485 | 49052763 |
| chr13 | 49058583 | 49058824 |
| chr13 | 49076158 | 49076308 |
| chr13 | 49088921 | 49089210 |
| chr13 | 49103970 | 49104198 |
| chr13 | 49117638 | 49117871 |
| chr13 | 49130668 | 49130852 |
| chr13 | 49141931 | 49142221 |
| chr13 | 49146301 | 49146518 |
| chr13 | 49146953 | 49147201 |
| chr13 | 49147201 | 49147444 |
| chr13 | 49147444 | 49147671 |
| chr13 | 49147671 | 49147925 |
| chr13 | 49147925 | 49148213 |
| chr13 | 49159382 | 49159532 |
| chr13 | 49168774 | 49168984 |
| chr13 | 49169838 | 49170136 |
| chr13 | 49172952 | 49173263 |
| chr13 | 49173263 | 49173560 |
| chr13 | 49173565 | 49173723 |
| chr13 | 49177925 | 49178194 |
| chr13 | 49181520 | 49181762 |
| chr13 | 49187286 | 49187621 |
| chr13 | 49187621 | 49187904 |
| chr13 | 49187904 | 49188197 |
| chr13 | 49188197 | 49188434 |
| chr13 | 49199951 | 49200254 |
| chr13 | 49205210 | 49205429 |
| chr13 | 49205429 | 49205748 |
| chr13 | 49205748 | 49206042 |
| chr13 | 49213379 | 49214016 |
| chr13 | 49215459 | 49215758 |
| chr13 | 49215790 | 49216207 |
| chr13 | 49216207 | 49216436 |
| chr13 | 49242712 | 49242862 |
| chr13 | 49248025 | 49248322 |
| chr13 | 49249563 | 49249960 |
| chr13 | 49252178 | 49252432 |
| chr13 | 49258482 | 49258813 |
| chr13 | 49258908 | 49259186 |



|       |          |          |
|-------|----------|----------|
| chr13 | 49259261 | 49259420 |
| chr13 | 49264248 | 49264533 |
| chr13 | 49264533 | 49264823 |
| chr13 | 49271892 | 49272042 |
| chr13 | 49272348 | 49272645 |
| chr13 | 49272814 | 49273181 |
| chr13 | 49273955 | 49274127 |
| chr13 | 49286826 | 49287029 |
| chr13 | 49294121 | 49294467 |
| chr13 | 49298314 | 49298889 |
| chr13 | 49298889 | 49299147 |
| chr13 | 49299147 | 49299463 |
| chr13 | 49300757 | 49301231 |
| chr13 | 49306942 | 49307276 |
| chr13 | 49307372 | 49308013 |
| chr13 | 49311705 | 49311911 |
| chr13 | 49313773 | 49313956 |
| chr13 | 49316349 | 49316823 |
| chr13 | 49316874 | 49317049 |
| chr13 | 49317154 | 49317306 |
| chr13 | 49320158 | 49320435 |
| chr13 | 49321500 | 49321745 |
| chr13 | 49321745 | 49321946 |
| chr13 | 49322231 | 49322513 |
| chr13 | 49326361 | 49326520 |
| chr13 | 49326890 | 49327136 |
| chr13 | 49328774 | 49328956 |
| chr13 | 49330967 | 49331209 |
| chr13 | 49338985 | 49339170 |
| chr13 | 49340979 | 49341297 |
| chr13 | 49341297 | 49341848 |
| chr13 | 49345499 | 49345826 |
| chr13 | 49346078 | 49346332 |
| chr13 | 49352168 | 49352389 |
| chr13 | 49361025 | 49361218 |
| chr13 | 49362326 | 49362595 |
| chr13 | 49362595 | 49362798 |
| chr13 | 49362798 | 49363096 |
| chr13 | 49364814 | 49365041 |
| chr13 | 49368103 | 49368327 |
| chr13 | 49371447 | 49371886 |
| chr13 | 49380718 | 49381076 |

|       |          |          |
|-------|----------|----------|
| chr13 | 49381111 | 49381600 |
| chr13 | 49391455 | 49391674 |
| chr13 | 49394939 | 49395386 |
| chr13 | 49396498 | 49396791 |
| chr13 | 49396791 | 49397184 |
| chr13 | 49400244 | 49400452 |
| chr13 | 49400865 | 49401182 |
| chr13 | 49402038 | 49402369 |
| chr13 | 49402369 | 49402663 |
| chr13 | 49402663 | 49403083 |
| chr13 | 49410220 | 49410436 |
| chr13 | 49410436 | 49410831 |
| chr13 | 49420684 | 49420977 |
| chr13 | 49420977 | 49421322 |
| chr13 | 49421322 | 49421616 |
| chr13 | 49421616 | 49421912 |
| chr13 | 49422064 | 49422285 |
| chr13 | 49441110 | 49441279 |
| chr13 | 49446840 | 49447164 |
| chr13 | 49448975 | 49449129 |
| chr13 | 49449304 | 49449523 |
| chr13 | 49449523 | 49449788 |
| chr13 | 49460356 | 49460553 |
| chr13 | 49481615 | 49481782 |
| chr13 | 49549432 | 49549706 |
| chr13 | 49549706 | 49550006 |
| chr13 | 49556138 | 49556525 |
| chr13 | 49556947 | 49557289 |
| chr13 | 49559272 | 49559450 |
| chr13 | 49560813 | 49561047 |
| chr13 | 49561047 | 49561274 |
| chr13 | 49561723 | 49562069 |
| chr13 | 49577496 | 49577741 |
| chr13 | 49577852 | 49578158 |
| chr13 | 49581188 | 49581380 |
| chr13 | 49581531 | 49581794 |
| chr13 | 49583851 | 49584282 |
| chr13 | 49584426 | 49584639 |
| chr13 | 49623334 | 49623484 |
| chr13 | 49626021 | 49626249 |
| chr13 | 49642733 | 49642951 |
| chr13 | 49644705 | 49644963 |

|       |          |          |
|-------|----------|----------|
| chr13 | 49645005 | 49645178 |
| chr13 | 49645291 | 49645446 |
| chr13 | 49652328 | 49652723 |
| chr13 | 49652723 | 49653201 |
| chr13 | 49653253 | 49653518 |
| chr13 | 49678537 | 49678763 |
| chr13 | 49681888 | 49682512 |
| chr13 | 49682526 | 49682732 |
| chr13 | 49700460 | 49700637 |
| chr13 | 49706700 | 49706950 |
| chr13 | 49708460 | 49708624 |
| chr13 | 49725419 | 49725570 |
| chr13 | 49751080 | 49751312 |
| chr13 | 49768046 | 49768426 |
| chr13 | 49768426 | 49768743 |
| chr13 | 49768743 | 49769109 |
| chr13 | 49807275 | 49807434 |
| chr13 | 50007766 | 50007916 |
| chr13 | 50183203 | 50183427 |
| chr13 | 50323847 | 50324034 |
| chr13 | 50342097 | 50342294 |
| chr13 | 50417675 | 50417977 |
| chr13 | 50417977 | 50418325 |
| chr13 | 50418626 | 50418931 |
| chr13 | 50763501 | 50763788 |
| chr13 | 50780170 | 50780345 |
| chr13 | 50829995 | 50830145 |
| chr13 | 50942539 | 50942984 |
| chr13 | 50942984 | 50943387 |
| chr13 | 50949595 | 50949933 |
| chr13 | 50957950 | 50958796 |
| chr13 | 50961010 | 50961212 |
| chr13 | 50965023 | 50965278 |
| chr13 | 50977474 | 50977726 |
| chr13 | 50977726 | 50977963 |
| chr13 | 50977963 | 50978262 |
| chr13 | 51010852 | 51011023 |
| chr13 | 51017925 | 51018083 |
| chr13 | 51019105 | 51019608 |
| chr13 | 51043217 | 51043421 |
| chr13 | 51063053 | 51063334 |
| chr13 | 51073464 | 51073815 |

|       |          |          |
|-------|----------|----------|
| chr13 | 51073815 | 51074108 |
| chr13 | 51085700 | 51085850 |
| chr13 | 51090024 | 51090293 |
| chr13 | 51090293 | 51090561 |
| chr13 | 51099872 | 51100092 |
| chr13 | 51100121 | 51100584 |
| chr13 | 51100584 | 51100788 |
| chr13 | 51100788 | 51101006 |
| chr13 | 51101006 | 51101363 |
| chr13 | 51101383 | 51101595 |
| chr13 | 51106096 | 51106295 |
| chr13 | 51114093 | 51114333 |
| chr13 | 51114388 | 51114794 |
| chr13 | 51115799 | 51116193 |
| chr13 | 51128053 | 51128286 |
| chr13 | 51128345 | 51128763 |
| chr13 | 51128763 | 51129064 |
| chr13 | 51131236 | 51131437 |
| chr13 | 51150977 | 51151187 |
| chr13 | 51152858 | 51153549 |
| chr13 | 51153665 | 51153885 |
| chr13 | 51170641 | 51170874 |
| chr13 | 51170874 | 51171095 |
| chr13 | 51171095 | 51171304 |
| chr13 | 51171304 | 51171495 |
| chr13 | 51171495 | 51171757 |
| chr13 | 51202581 | 51202872 |
| chr13 | 51202872 | 51203133 |
| chr13 | 51227768 | 51227987 |
| chr13 | 51227987 | 51228205 |
| chr13 | 51269740 | 51269900 |
| chr13 | 51299143 | 51299310 |
| chr13 | 51329043 | 51329255 |
| chr13 | 51333018 | 51333168 |
| chr13 | 51333549 | 51333783 |
| chr13 | 51373176 | 51373338 |
| chr13 | 51418620 | 51418915 |
| chr13 | 51420527 | 51420677 |
| chr13 | 51424825 | 51425011 |
| chr13 | 51434602 | 51434752 |
| chr13 | 51518974 | 51519298 |
| chr13 | 51526532 | 51526831 |

|       |          |          |
|-------|----------|----------|
| chr13 | 51539811 | 51540193 |
| chr13 | 51569084 | 51569269 |
| chr13 | 51569390 | 51569630 |
| chr13 | 51594922 | 51595072 |
| chr13 | 51603338 | 51603501 |
| chr13 | 51634113 | 51634423 |
| chr13 | 51635500 | 51636193 |
| chr13 | 51637001 | 51637165 |
| chr13 | 51638710 | 51638995 |
| chr13 | 51644815 | 51645447 |
| chr13 | 51645447 | 51645826 |
| chr13 | 51645968 | 51646160 |
| chr13 | 51651339 | 51651802 |
| chr13 | 51651802 | 51652134 |
| chr13 | 51663999 | 51664236 |
| chr13 | 51664236 | 51664489 |
| chr13 | 51676549 | 51677089 |
| chr13 | 51677089 | 51677456 |
| chr13 | 51678791 | 51678995 |
| chr13 | 51679424 | 51679683 |
| chr13 | 51686051 | 51686206 |
| chr13 | 51695806 | 51696201 |
| chr13 | 51697243 | 51697466 |
| chr13 | 51697466 | 51697784 |
| chr13 | 51704944 | 51705149 |
| chr13 | 51706572 | 51706808 |
| chr13 | 51706808 | 51706986 |
| chr13 | 51710861 | 51711083 |
| chr13 | 51711250 | 51711413 |
| chr13 | 51717015 | 51717413 |
| chr13 | 51717413 | 51717631 |
| chr13 | 51717631 | 51717822 |
| chr13 | 51720353 | 51720515 |
| chr13 | 51726186 | 51726593 |
| chr13 | 51729907 | 51730064 |
| chr13 | 51731274 | 51731582 |
| chr13 | 51731678 | 51731867 |
| chr13 | 51731867 | 51732149 |
| chr13 | 51739593 | 51740001 |
| chr13 | 51740001 | 51740340 |
| chr13 | 51748076 | 51748472 |
| chr13 | 51748472 | 51748793 |

|       |          |          |
|-------|----------|----------|
| chr13 | 51753734 | 51753915 |
| chr13 | 51754085 | 51754396 |
| chr13 | 51754396 | 51754737 |
| chr13 | 51754737 | 51755063 |
| chr13 | 51755634 | 51755845 |
| chr13 | 51756490 | 51756858 |
| chr13 | 51762870 | 51763801 |
| chr13 | 51781546 | 51781765 |
| chr13 | 51790778 | 51791200 |
| chr13 | 51791663 | 51791920 |
| chr13 | 51792277 | 51792570 |
| chr13 | 51792783 | 51793032 |
| chr13 | 51793032 | 51793331 |
| chr13 | 51793331 | 51793622 |
| chr13 | 51793622 | 51793905 |
| chr13 | 51806379 | 51806625 |
| chr13 | 51806627 | 51807010 |
| chr13 | 51813632 | 51813925 |
| chr13 | 51813925 | 51814257 |
| chr13 | 51814257 | 51814475 |
| chr13 | 51815916 | 51816196 |
| chr13 | 51819032 | 51819279 |
| chr13 | 51830773 | 51830952 |
| chr13 | 51833661 | 51834016 |
| chr13 | 51834105 | 51834463 |
| chr13 | 51838726 | 51838876 |
| chr13 | 51839712 | 51839972 |
| chr13 | 51845546 | 51845903 |
| chr13 | 51845903 | 51846186 |
| chr13 | 51846400 | 51846794 |
| chr13 | 51846854 | 51847506 |
| chr13 | 51847922 | 51848144 |
| chr13 | 51848144 | 51848409 |
| chr13 | 51848919 | 51849135 |
| chr13 | 51852866 | 51853184 |
| chr13 | 51853240 | 51853626 |
| chr13 | 51853626 | 51854072 |
| chr13 | 51858575 | 51858786 |
| chr13 | 51859268 | 51859488 |
| chr13 | 51859816 | 51860085 |
| chr13 | 51860739 | 51860913 |
| chr13 | 51866436 | 51866773 |

|       |          |          |
|-------|----------|----------|
| chr13 | 51868465 | 51868727 |
| chr13 | 51870829 | 51871074 |
| chr13 | 51871294 | 51871444 |
| chr13 | 51886127 | 51886414 |
| chr13 | 51886758 | 51887257 |
| chr13 | 51892039 | 51892515 |
| chr13 | 51897674 | 51897925 |
| chr13 | 51898507 | 51898776 |
| chr13 | 51899626 | 51899786 |
| chr13 | 51906194 | 51906523 |
| chr13 | 51908749 | 51909468 |
| chr13 | 51936424 | 51936574 |
| chr13 | 51945943 | 51946242 |
| chr13 | 51946242 | 51946520 |
| chr13 | 51955929 | 51956345 |
| chr13 | 51958525 | 51958726 |
| chr13 | 51962664 | 51963095 |
| chr13 | 51963770 | 51964044 |
| chr13 | 51964353 | 51964624 |
| chr13 | 51964624 | 51964858 |
| chr13 | 51968468 | 51968817 |
| chr13 | 51968817 | 51969219 |
| chr13 | 51970077 | 51970454 |
| chr13 | 51972674 | 51973014 |
| chr13 | 51975516 | 51975851 |
| chr13 | 51975851 | 51976412 |
| chr13 | 51979391 | 51979568 |
| chr13 | 51983072 | 51983283 |
| chr13 | 51986561 | 51986833 |
| chr13 | 51994181 | 51994509 |
| chr13 | 51995985 | 51996272 |
| chr13 | 51996272 | 51996562 |
| chr13 | 52001846 | 52002118 |
| chr13 | 52002118 | 52002385 |
| chr13 | 52003232 | 52003423 |
| chr13 | 52003423 | 52003622 |
| chr13 | 52003622 | 52003973 |
| chr13 | 52013600 | 52014171 |
| chr13 | 52014617 | 52014861 |
| chr13 | 52017705 | 52018253 |
| chr13 | 52024189 | 52024386 |
| chr13 | 52024386 | 52024722 |

|       |          |          |
|-------|----------|----------|
| chr13 | 52025213 | 52025466 |
| chr13 | 52025466 | 52025808 |
| chr13 | 52030797 | 52031068 |
| chr13 | 52036452 | 52036610 |
| chr13 | 52038866 | 52039202 |
| chr13 | 52041908 | 52042127 |
| chr13 | 52043525 | 52043805 |
| chr13 | 52044888 | 52045255 |
| chr13 | 52048011 | 52048287 |
| chr13 | 52048743 | 52049185 |
| chr13 | 52055156 | 52055520 |
| chr13 | 52061879 | 52062291 |
| chr13 | 52064637 | 52064975 |
| chr13 | 52065278 | 52065689 |
| chr13 | 52069760 | 52070097 |
| chr13 | 52078645 | 52078947 |
| chr13 | 52078956 | 52079154 |
| chr13 | 52079244 | 52079404 |
| chr13 | 52079633 | 52079935 |
| chr13 | 52079935 | 52080338 |
| chr13 | 52101730 | 52101880 |
| chr13 | 52109766 | 52109952 |
| chr13 | 52114965 | 52115283 |
| chr13 | 52151910 | 52152128 |
| chr13 | 52161759 | 52162168 |
| chr13 | 52175624 | 52176045 |
| chr13 | 52188342 | 52188577 |
| chr13 | 52188577 | 52188888 |
| chr13 | 52189646 | 52189857 |
| chr13 | 52189857 | 52190066 |
| chr13 | 52190247 | 52190686 |
| chr13 | 52199606 | 52199871 |
| chr13 | 52206468 | 52206618 |
| chr13 | 52217103 | 52217258 |
| chr13 | 52223466 | 52223903 |
| chr13 | 52234068 | 52234311 |
| chr13 | 52235580 | 52235902 |
| chr13 | 52236103 | 52236766 |
| chr13 | 52239736 | 52239956 |
| chr13 | 52241816 | 52242105 |
| chr13 | 52243395 | 52243830 |
| chr13 | 52249369 | 52249946 |



|       |          |          |
|-------|----------|----------|
| chr13 | 52250007 | 52250187 |
| chr13 | 52250469 | 52250701 |
| chr13 | 52275718 | 52276059 |
| chr13 | 52277198 | 52277628 |
| chr13 | 52293488 | 52293707 |
| chr13 | 52305331 | 52305729 |
| chr13 | 52307109 | 52307405 |
| chr13 | 52308725 | 52308888 |
| chr13 | 52323773 | 52324014 |
| chr13 | 52324376 | 52324968 |
| chr13 | 52333937 | 52334151 |
| chr13 | 52336685 | 52336980 |
| chr13 | 52339017 | 52339676 |
| chr13 | 52343242 | 52343397 |
| chr13 | 52344442 | 52344742 |
| chr13 | 52344831 | 52345359 |
| chr13 | 52345650 | 52346014 |
| chr13 | 52361521 | 52361736 |
| chr13 | 52449052 | 52449238 |
| chr13 | 52455179 | 52455448 |
| chr13 | 52455448 | 52455741 |
| chr13 | 52455843 | 52456146 |
| chr13 | 52469682 | 52470178 |
| chr13 | 52477985 | 52478292 |
| chr13 | 52478292 | 52478614 |
| chr13 | 52481777 | 52482294 |
| chr13 | 52488577 | 52489191 |
| chr13 | 52489545 | 52489853 |
| chr13 | 52495558 | 52496091 |
| chr13 | 52510175 | 52510459 |
| chr13 | 52515997 | 52516403 |
| chr13 | 52518407 | 52518609 |
| chr13 | 52530251 | 52530679 |
| chr13 | 52530679 | 52530984 |
| chr13 | 52535619 | 52535875 |
| chr13 | 52563897 | 52564052 |
| chr13 | 52565492 | 52565703 |
| chr13 | 52568053 | 52568230 |
| chr13 | 52580409 | 52580705 |
| chr13 | 52580876 | 52581185 |
| chr13 | 52582585 | 52582891 |
| chr13 | 52582920 | 52583175 |

|       |          |          |
|-------|----------|----------|
| chr13 | 52583175 | 52583691 |
| chr13 | 52587772 | 52588204 |
| chr13 | 52602913 | 52603089 |
| chr13 | 52623143 | 52623455 |
| chr13 | 52623537 | 52623957 |
| chr13 | 52624086 | 52624375 |
| chr13 | 52628611 | 52628926 |
| chr13 | 52629059 | 52629229 |
| chr13 | 52651391 | 52651670 |
| chr13 | 52651849 | 52652307 |
| chr13 | 52658579 | 52658812 |
| chr13 | 52658812 | 52659089 |
| chr13 | 52659089 | 52659371 |
| chr13 | 52659371 | 52659856 |
| chr13 | 52669817 | 52670335 |
| chr13 | 52673359 | 52673645 |
| chr13 | 52675569 | 52675927 |
| chr13 | 52675952 | 52676307 |
| chr13 | 52676609 | 52677001 |
| chr13 | 52695013 | 52695203 |
| chr13 | 52702049 | 52702316 |
| chr13 | 52707449 | 52707664 |
| chr13 | 52711756 | 52712033 |
| chr13 | 52712033 | 52712340 |
| chr13 | 52726163 | 52726334 |
| chr13 | 52765510 | 52765773 |
| chr13 | 52765773 | 52766083 |
| chr13 | 52770512 | 52770733 |
| chr13 | 52807683 | 52807898 |
| chr13 | 52809067 | 52809447 |
| chr13 | 52818812 | 52819235 |
| chr13 | 52821557 | 52822031 |
| chr13 | 52828016 | 52828166 |
| chr13 | 52828274 | 52828437 |
| chr13 | 52828920 | 52829451 |
| chr13 | 52829574 | 52829746 |
| chr13 | 52833307 | 52833532 |
| chr13 | 52850398 | 52850649 |
| chr13 | 52860406 | 52860569 |
| chr13 | 52866049 | 52866273 |
| chr13 | 52873919 | 52874377 |
| chr13 | 52874501 | 52874704 |

|       |          |          |
|-------|----------|----------|
| chr13 | 52876055 | 52876205 |
| chr13 | 52883171 | 52883417 |
| chr13 | 52891364 | 52891555 |
| chr13 | 52891555 | 52891746 |
| chr13 | 52891813 | 52891978 |
| chr13 | 52892000 | 52892315 |
| chr13 | 52892315 | 52892659 |
| chr13 | 52892876 | 52893187 |
| chr13 | 52893187 | 52893568 |
| chr13 | 52900249 | 52900516 |
| chr13 | 52903823 | 52904016 |
| chr13 | 52929197 | 52929813 |
| chr13 | 52929813 | 52930112 |
| chr13 | 52966135 | 52966323 |
| chr13 | 52971175 | 52971453 |
| chr13 | 52973370 | 52973967 |
| chr13 | 52978421 | 52978633 |
| chr13 | 52980202 | 52980505 |
| chr13 | 52980505 | 52980881 |
| chr13 | 52980881 | 52981306 |
| chr13 | 52981306 | 52981652 |
| chr13 | 52981652 | 52981947 |
| chr13 | 52981947 | 52982227 |
| chr13 | 52982727 | 52982923 |
| chr13 | 52982928 | 52983112 |
| chr13 | 52987472 | 52987817 |
| chr13 | 52987900 | 52988304 |
| chr13 | 52988444 | 52988732 |
| chr13 | 52994281 | 52994528 |
| chr13 | 52995278 | 52995474 |
| chr13 | 53001435 | 53001909 |
| chr13 | 53001909 | 53002269 |
| chr13 | 53008530 | 53008794 |
| chr13 | 53008794 | 53009403 |
| chr13 | 53018131 | 53018421 |
| chr13 | 53019045 | 53019279 |
| chr13 | 53019345 | 53019613 |
| chr13 | 53019613 | 53019857 |
| chr13 | 53026623 | 53026799 |
| chr13 | 53033549 | 53034189 |
| chr13 | 53060616 | 53060804 |
| chr13 | 53064764 | 53065168 |

|       |          |          |
|-------|----------|----------|
| chr13 | 53065242 | 53065494 |
| chr13 | 53079647 | 53079800 |
| chr13 | 53088495 | 53088660 |
| chr13 | 53093367 | 53093784 |
| chr13 | 53093789 | 53093976 |
| chr13 | 53096733 | 53096966 |
| chr13 | 53099691 | 53100074 |
| chr13 | 53109541 | 53109964 |
| chr13 | 53118442 | 53118701 |
| chr13 | 53119792 | 53120031 |
| chr13 | 53125697 | 53125868 |
| chr13 | 53151272 | 53151531 |
| chr13 | 53152888 | 53153171 |
| chr13 | 53160475 | 53160865 |
| chr13 | 53187410 | 53187583 |
| chr13 | 53211948 | 53212168 |
| chr13 | 53232183 | 53232377 |
| chr13 | 53232416 | 53232785 |
| chr13 | 53240863 | 53241044 |
| chr13 | 53247455 | 53247662 |
| chr13 | 53248644 | 53249012 |
| chr13 | 53249012 | 53249554 |
| chr13 | 53261486 | 53261640 |
| chr13 | 53267991 | 53268166 |
| chr13 | 53269800 | 53270064 |
| chr13 | 53279394 | 53279719 |
| chr13 | 53285599 | 53286043 |
| chr13 | 53286043 | 53286389 |
| chr13 | 53298614 | 53298933 |
| chr13 | 53299094 | 53299410 |
| chr13 | 53315843 | 53316058 |
| chr13 | 53316462 | 53316959 |
| chr13 | 53338700 | 53338908 |
| chr13 | 53338919 | 53339198 |
| chr13 | 53339198 | 53339566 |
| chr13 | 53339566 | 53339898 |
| chr13 | 53342283 | 53342572 |
| chr13 | 53356199 | 53356440 |
| chr13 | 53356440 | 53356712 |
| chr13 | 53361324 | 53361557 |
| chr13 | 53377038 | 53377821 |
| chr13 | 53390151 | 53390679 |

|       |          |          |
|-------|----------|----------|
| chr13 | 53398979 | 53399324 |
| chr13 | 53400024 | 53400369 |
| chr13 | 53402252 | 53402418 |
| chr13 | 53402421 | 53402572 |
| chr13 | 53403601 | 53403787 |
| chr13 | 53404248 | 53404535 |
| chr13 | 53404535 | 53404887 |
| chr13 | 53407309 | 53407476 |
| chr13 | 53412907 | 53413099 |
| chr13 | 53413174 | 53413741 |
| chr13 | 53414707 | 53415044 |
| chr13 | 53426538 | 53426859 |
| chr13 | 53430975 | 53431142 |
| chr13 | 53431273 | 53431511 |
| chr13 | 53439563 | 53439879 |
| chr13 | 53439951 | 53440363 |
| chr13 | 53442666 | 53442865 |
| chr13 | 53443687 | 53444162 |
| chr13 | 53445754 | 53446034 |
| chr13 | 53447640 | 53447955 |
| chr13 | 53461733 | 53462176 |
| chr13 | 53462176 | 53462473 |
| chr13 | 53462473 | 53462799 |
| chr13 | 53463047 | 53463251 |
| chr13 | 53471460 | 53471610 |
| chr13 | 53472225 | 53472698 |
| chr13 | 53472698 | 53473007 |
| chr13 | 53475658 | 53475874 |
| chr13 | 53475874 | 53476268 |
| chr13 | 53496653 | 53496862 |
| chr13 | 53501158 | 53501319 |
| chr13 | 53501947 | 53502162 |
| chr13 | 53502270 | 53502799 |
| chr13 | 53503005 | 53503178 |
| chr13 | 53503178 | 53503360 |
| chr13 | 53511403 | 53511711 |
| chr13 | 53514516 | 53514965 |
| chr13 | 53535200 | 53535752 |
| chr13 | 53551499 | 53551677 |
| chr13 | 53558893 | 53559275 |
| chr13 | 53567531 | 53568011 |
| chr13 | 53584709 | 53585095 |

|       |          |          |
|-------|----------|----------|
| chr13 | 53585095 | 53585459 |
| chr13 | 53588361 | 53588728 |
| chr13 | 53592851 | 53593075 |
| chr13 | 53598132 | 53598318 |
| chr13 | 53614880 | 53615219 |
| chr13 | 53627776 | 53628092 |
| chr13 | 53652867 | 53653283 |
| chr13 | 53654568 | 53655139 |
| chr13 | 53658235 | 53658512 |
| chr13 | 53659174 | 53659651 |
| chr13 | 53662804 | 53663289 |
| chr13 | 53664729 | 53664940 |
| chr13 | 53680531 | 53680723 |
| chr13 | 53684784 | 53685042 |
| chr13 | 53685042 | 53685410 |
| chr13 | 53688522 | 53688821 |
| chr13 | 53694573 | 53695006 |
| chr13 | 53695432 | 53695740 |
| chr13 | 53699473 | 53699743 |
| chr13 | 53717271 | 53717458 |
| chr13 | 53717565 | 53717896 |
| chr13 | 53721085 | 53721626 |
| chr13 | 53729954 | 53730338 |
| chr13 | 53730368 | 53730785 |
| chr13 | 53731306 | 53731534 |
| chr13 | 53734577 | 53734849 |
| chr13 | 53734849 | 53735106 |
| chr13 | 53764736 | 53765214 |
| chr13 | 53770133 | 53770660 |
| chr13 | 53775733 | 53776061 |
| chr13 | 53778674 | 53778876 |
| chr13 | 53779214 | 53779400 |
| chr13 | 53783538 | 53783791 |
| chr13 | 53815704 | 53816052 |
| chr13 | 53920151 | 53920381 |
| chr13 | 54019671 | 54020211 |
| chr13 | 54020211 | 54020550 |
| chr13 | 54055408 | 54055894 |
| chr13 | 54069716 | 54070057 |
| chr13 | 54071631 | 54071995 |
| chr13 | 54071995 | 54072502 |
| chr13 | 54075525 | 54075724 |

|       |          |          |
|-------|----------|----------|
| chr13 | 54078677 | 54078854 |
| chr13 | 54100779 | 54101146 |
| chr13 | 54101146 | 54101450 |
| chr13 | 54101450 | 54101815 |
| chr13 | 54102151 | 54102389 |
| chr13 | 54104006 | 54104176 |
| chr13 | 54113855 | 54114137 |
| chr13 | 54117993 | 54118346 |
| chr13 | 54152522 | 54152694 |
| chr13 | 54189970 | 54190224 |
| chr13 | 54231860 | 54232359 |
| chr13 | 54247625 | 54247920 |
| chr13 | 54296090 | 54296299 |
| chr13 | 54302656 | 54303044 |
| chr13 | 54303044 | 54303346 |
| chr13 | 54303346 | 54303662 |
| chr13 | 54303770 | 54303987 |
| chr13 | 54323069 | 54323331 |
| chr13 | 54371350 | 54371625 |
| chr13 | 54371625 | 54372032 |
| chr13 | 54372843 | 54373087 |
| chr13 | 54415212 | 54415392 |
| chr13 | 54446859 | 54447009 |
| chr13 | 54447044 | 54447416 |
| chr13 | 54447950 | 54448177 |
| chr13 | 54457135 | 54457395 |
| chr13 | 54468277 | 54468629 |
| chr13 | 54468629 | 54469043 |
| chr13 | 54469063 | 54469237 |
| chr13 | 54483918 | 54484189 |
| chr13 | 54486265 | 54486425 |
| chr13 | 54488531 | 54488735 |
| chr13 | 54503313 | 54503599 |
| chr13 | 54503599 | 54503874 |
| chr13 | 54503874 | 54504108 |
| chr13 | 54504108 | 54504312 |
| chr13 | 54504312 | 54504563 |
| chr13 | 54520349 | 54520525 |
| chr13 | 54524908 | 54525300 |
| chr13 | 54525300 | 54525790 |
| chr13 | 54525790 | 54526293 |
| chr13 | 54527165 | 54527501 |

|       |          |          |
|-------|----------|----------|
| chr13 | 54535931 | 54536523 |
| chr13 | 54564306 | 54564486 |
| chr13 | 54564707 | 54564892 |
| chr13 | 54564892 | 54565180 |
| chr13 | 54565180 | 54565597 |
| chr13 | 54565630 | 54565889 |
| chr13 | 54569900 | 54570065 |
| chr13 | 54574828 | 54575192 |
| chr13 | 54575192 | 54575530 |
| chr13 | 54575552 | 54575746 |
| chr13 | 54575746 | 54575929 |
| chr13 | 54589619 | 54589771 |
| chr13 | 54589771 | 54589936 |
| chr13 | 54589945 | 54590348 |
| chr13 | 54590348 | 54590958 |
| chr13 | 54596104 | 54596423 |
| chr13 | 54605477 | 54605882 |
| chr13 | 54608152 | 54608504 |
| chr13 | 54608504 | 54608848 |
| chr13 | 54608848 | 54609080 |
| chr13 | 54610631 | 54610921 |
| chr13 | 54610921 | 54611205 |
| chr13 | 54611205 | 54611474 |
| chr13 | 54611474 | 54611706 |
| chr13 | 54617102 | 54617316 |
| chr13 | 54621554 | 54621925 |
| chr13 | 54621925 | 54622138 |
| chr13 | 54622138 | 54622328 |
| chr13 | 54622328 | 54622592 |
| chr13 | 54625608 | 54625794 |
| chr13 | 54647023 | 54647905 |
| chr13 | 54660987 | 54661150 |
| chr13 | 54661217 | 54661700 |
| chr13 | 54661700 | 54661976 |
| chr13 | 54670379 | 54670823 |
| chr13 | 54671772 | 54671934 |
| chr13 | 54675790 | 54676274 |
| chr13 | 54678442 | 54678666 |
| chr13 | 54678669 | 54678873 |
| chr13 | 54686369 | 54686607 |
| chr13 | 54687108 | 54687486 |
| chr13 | 54687486 | 54687742 |



|       |          |          |
|-------|----------|----------|
| chr13 | 54687742 | 54688003 |
| chr13 | 54688003 | 54688472 |
| chr13 | 54693505 | 54694136 |
| chr13 | 54694136 | 54694425 |
| chr13 | 54694425 | 54694698 |
| chr13 | 54701291 | 54701546 |
| chr13 | 54703797 | 54704316 |
| chr13 | 54708586 | 54708777 |
| chr13 | 54708965 | 54709292 |
| chr13 | 54709292 | 54709605 |
| chr13 | 54710944 | 54711212 |
| chr13 | 54716062 | 54716486 |
| chr13 | 54716981 | 54717348 |
| chr13 | 54719602 | 54719961 |
| chr13 | 54737639 | 54737913 |
| chr13 | 54737913 | 54738350 |
| chr13 | 54748885 | 54749257 |
| chr13 | 54749257 | 54749829 |
| chr13 | 54754203 | 54754420 |
| chr13 | 54757120 | 54757421 |
| chr13 | 54758043 | 54758339 |
| chr13 | 54758339 | 54758917 |
| chr13 | 54766036 | 54766207 |
| chr13 | 54766267 | 54766745 |
| chr13 | 54768875 | 54769055 |
| chr13 | 54780718 | 54781029 |
| chr13 | 54788956 | 54789285 |
| chr13 | 54789285 | 54789570 |
| chr13 | 54789570 | 54789837 |
| chr13 | 54789837 | 54790128 |
| chr13 | 54797476 | 54797656 |
| chr13 | 54799496 | 54799750 |
| chr13 | 54799750 | 54799992 |
| chr13 | 54800011 | 54800188 |
| chr13 | 54813222 | 54813735 |
| chr13 | 54813735 | 54814082 |
| chr13 | 54821217 | 54821418 |
| chr13 | 54828115 | 54828340 |
| chr13 | 54828641 | 54828794 |
| chr13 | 54868013 | 54868214 |
| chr13 | 54911781 | 54911940 |
| chr13 | 54945432 | 54945647 |

|       |          |          |
|-------|----------|----------|
| chr13 | 54948929 | 54949294 |
| chr13 | 54949294 | 54949559 |
| chr13 | 54949559 | 54949978 |
| chr13 | 54951302 | 54951469 |
| chr13 | 54955754 | 54955959 |
| chr13 | 54955977 | 54956485 |
| chr13 | 54970943 | 54971161 |
| chr13 | 54973830 | 54974020 |
| chr13 | 54997962 | 54998113 |
| chr13 | 55004593 | 55004826 |
| chr13 | 55004826 | 55005044 |
| chr13 | 55005139 | 55005365 |
| chr13 | 55005533 | 55005705 |
| chr13 | 55005705 | 55005812 |
| chr13 | 55011938 | 55012263 |
| chr13 | 55087639 | 55087815 |
| chr13 | 55099388 | 55099757 |
| chr13 | 55099757 | 55100085 |
| chr13 | 55100085 | 55100460 |
| chr13 | 55105075 | 55105423 |
| chr13 | 55105423 | 55105824 |
| chr13 | 55107867 | 55108046 |
| chr13 | 55135262 | 55135422 |
| chr13 | 55135422 | 55135606 |
| chr13 | 55149188 | 55149415 |
| chr13 | 55149832 | 55150179 |
| chr13 | 55151196 | 55151573 |
| chr13 | 55171588 | 55171908 |
| chr13 | 55171908 | 55172196 |
| chr13 | 55172581 | 55172790 |
| chr13 | 55178667 | 55178896 |
| chr13 | 55183347 | 55183796 |
| chr13 | 55184297 | 55184506 |
| chr13 | 55184518 | 55184917 |
| chr13 | 55187056 | 55187400 |
| chr13 | 55188784 | 55189096 |
| chr13 | 55189278 | 55189428 |
| chr13 | 55189453 | 55189672 |
| chr13 | 55189672 | 55190060 |
| chr13 | 55190060 | 55190530 |
| chr13 | 55190530 | 55190797 |
| chr13 | 55192785 | 55192937 |

|       |          |          |
|-------|----------|----------|
| chr13 | 55211125 | 55211402 |
| chr13 | 55211402 | 55211690 |
| chr13 | 55211690 | 55211994 |
| chr13 | 55211994 | 55212332 |
| chr13 | 55212332 | 55212596 |
| chr13 | 55212596 | 55212844 |
| chr13 | 55212891 | 55213095 |
| chr13 | 55230781 | 55231002 |
| chr13 | 55269559 | 55269966 |
| chr13 | 55319953 | 55320492 |
| chr13 | 55321436 | 55321670 |
| chr13 | 55321670 | 55321894 |
| chr13 | 55321894 | 55322140 |
| chr13 | 55322140 | 55322360 |
| chr13 | 55322501 | 55322738 |
| chr13 | 55327388 | 55327644 |
| chr13 | 55327675 | 55328065 |
| chr13 | 55329187 | 55329427 |
| chr13 | 55329427 | 55329687 |
| chr13 | 55329687 | 55329950 |
| chr13 | 55329950 | 55330134 |
| chr13 | 55330134 | 55330374 |
| chr13 | 55330374 | 55330705 |
| chr13 | 55339294 | 55339691 |
| chr13 | 55343301 | 55343452 |
| chr13 | 55350483 | 55350745 |
| chr13 | 55351251 | 55351422 |
| chr13 | 55352831 | 55352989 |
| chr13 | 55354587 | 55354775 |
| chr13 | 55362075 | 55362605 |
| chr13 | 55362605 | 55363206 |
| chr13 | 55368481 | 55368710 |
| chr13 | 55369068 | 55369363 |
| chr13 | 55369363 | 55369589 |
| chr13 | 55369589 | 55369809 |
| chr13 | 55369912 | 55370195 |
| chr13 | 55378932 | 55379290 |
| chr13 | 55379290 | 55379557 |
| chr13 | 55380143 | 55380349 |
| chr13 | 55386273 | 55386435 |
| chr13 | 55388163 | 55388321 |
| chr13 | 55393015 | 55393183 |

|       |          |          |
|-------|----------|----------|
| chr13 | 55399863 | 55400023 |
| chr13 | 55404478 | 55404722 |
| chr13 | 55405440 | 55405771 |
| chr13 | 55417948 | 55418568 |
| chr13 | 55420621 | 55420800 |
| chr13 | 55421194 | 55421425 |
| chr13 | 55422251 | 55422468 |
| chr13 | 55425968 | 55426211 |
| chr13 | 55429266 | 55429554 |
| chr13 | 55430677 | 55430878 |
| chr13 | 55444453 | 55444865 |
| chr13 | 55444865 | 55445152 |
| chr13 | 55445152 | 55445648 |
| chr13 | 55450199 | 55450459 |
| chr13 | 55450459 | 55450987 |
| chr13 | 55464031 | 55464328 |
| chr13 | 55464328 | 55464610 |
| chr13 | 55464610 | 55464940 |
| chr13 | 55465163 | 55465816 |
| chr13 | 55469280 | 55469442 |
| chr13 | 55471218 | 55471445 |
| chr13 | 55471445 | 55471803 |
| chr13 | 55471803 | 55472214 |
| chr13 | 55472214 | 55472525 |
| chr13 | 55472525 | 55472747 |
| chr13 | 55472747 | 55473014 |
| chr13 | 55475893 | 55476072 |
| chr13 | 55482600 | 55482774 |
| chr13 | 55487082 | 55487321 |
| chr13 | 55487321 | 55487556 |
| chr13 | 55487556 | 55487804 |
| chr13 | 55487808 | 55488620 |
| chr13 | 55493752 | 55493946 |
| chr13 | 55493946 | 55494126 |
| chr13 | 55494277 | 55494554 |
| chr13 | 55494644 | 55494818 |
| chr13 | 55496759 | 55496948 |
| chr13 | 55498002 | 55498242 |
| chr13 | 55498453 | 55498627 |
| chr13 | 55498770 | 55499016 |
| chr13 | 55499749 | 55499932 |
| chr13 | 55510368 | 55510639 |

|       |          |          |
|-------|----------|----------|
| chr13 | 55510639 | 55511007 |
| chr13 | 55511007 | 55511402 |
| chr13 | 55511402 | 55511853 |
| chr13 | 55512697 | 55512917 |
| chr13 | 55513113 | 55513390 |
| chr13 | 55513390 | 55513708 |
| chr13 | 55517063 | 55517213 |
| chr13 | 55522866 | 55523048 |
| chr13 | 55524696 | 55524857 |
| chr13 | 55526115 | 55526348 |
| chr13 | 55527149 | 55527553 |
| chr13 | 55528720 | 55528952 |
| chr13 | 55535994 | 55536217 |
| chr13 | 55536217 | 55536524 |
| chr13 | 55536524 | 55536944 |
| chr13 | 55536966 | 55537132 |
| chr13 | 55548472 | 55548784 |
| chr13 | 55569748 | 55569950 |
| chr13 | 55570194 | 55570416 |
| chr13 | 55570416 | 55570615 |
| chr13 | 55570615 | 55570922 |
| chr13 | 55570922 | 55571275 |
| chr13 | 55571275 | 55571536 |
| chr13 | 55576041 | 55576246 |
| chr13 | 55578906 | 55579089 |
| chr13 | 55592805 | 55593258 |
| chr13 | 55593258 | 55593634 |
| chr13 | 55599732 | 55600256 |
| chr13 | 55600709 | 55601025 |
| chr13 | 55604594 | 55605066 |
| chr13 | 55611245 | 55611468 |
| chr13 | 55611802 | 55611952 |
| chr13 | 55612703 | 55612951 |
| chr13 | 55619093 | 55619243 |
| chr13 | 55622404 | 55622852 |
| chr13 | 55622852 | 55623130 |
| chr13 | 55623130 | 55623334 |
| chr13 | 55623334 | 55623545 |
| chr13 | 55634587 | 55634849 |
| chr13 | 55634849 | 55635128 |
| chr13 | 55635128 | 55635547 |
| chr13 | 55640529 | 55640826 |

|       |          |          |
|-------|----------|----------|
| chr13 | 55644614 | 55644887 |
| chr13 | 55650192 | 55650403 |
| chr13 | 55668633 | 55668883 |
| chr13 | 55670695 | 55670845 |
| chr13 | 55675450 | 55675604 |
| chr13 | 55683625 | 55683904 |
| chr13 | 55692181 | 55692409 |
| chr13 | 55692409 | 55692789 |
| chr13 | 55692789 | 55693630 |
| chr13 | 55704386 | 55704619 |
| chr13 | 55714285 | 55714471 |
| chr13 | 55714486 | 55714772 |
| chr13 | 55714772 | 55715283 |
| chr13 | 55727034 | 55727594 |
| chr13 | 55727594 | 55727863 |
| chr13 | 55727925 | 55728242 |
| chr13 | 55737977 | 55738197 |
| chr13 | 55757717 | 55757926 |
| chr13 | 55786204 | 55786409 |
| chr13 | 55789966 | 55790181 |
| chr13 | 55824174 | 55824462 |
| chr13 | 55828599 | 55828794 |
| chr13 | 55830940 | 55831109 |
| chr13 | 55831109 | 55831304 |
| chr13 | 55831304 | 55831585 |
| chr13 | 55835738 | 55835898 |
| chr13 | 55835901 | 55836162 |
| chr13 | 55836850 | 55837018 |
| chr13 | 55837110 | 55837395 |
| chr13 | 55862052 | 55862321 |
| chr13 | 55866977 | 55867148 |
| chr13 | 55867453 | 55867979 |
| chr13 | 55868591 | 55868793 |
| chr13 | 55894734 | 55894921 |
| chr13 | 55895432 | 55895853 |
| chr13 | 55897990 | 55898187 |
| chr13 | 55902384 | 55902599 |
| chr13 | 55911018 | 55911305 |
| chr13 | 55912118 | 55912311 |
| chr13 | 55919876 | 55920160 |
| chr13 | 55920445 | 55920824 |
| chr13 | 55923593 | 55923783 |

|       |          |          |
|-------|----------|----------|
| chr13 | 55934058 | 55934349 |
| chr13 | 55936998 | 55937279 |
| chr13 | 55954417 | 55954685 |
| chr13 | 55963140 | 55963334 |
| chr13 | 55963334 | 55963586 |
| chr13 | 55974215 | 55974434 |
| chr13 | 55977065 | 55977374 |
| chr13 | 55992628 | 55993069 |
| chr13 | 55993069 | 55993326 |
| chr13 | 55996510 | 55996775 |
| chr13 | 56004048 | 56004306 |
| chr13 | 56005781 | 56005994 |
| chr13 | 56006919 | 56007074 |
| chr13 | 56007406 | 56007591 |
| chr13 | 56008126 | 56008448 |
| chr13 | 56021448 | 56022099 |
| chr13 | 56026761 | 56027061 |
| chr13 | 56027648 | 56027862 |
| chr13 | 56028037 | 56028351 |
| chr13 | 56029092 | 56029398 |
| chr13 | 56039678 | 56040030 |
| chr13 | 56040030 | 56040349 |
| chr13 | 56045132 | 56045450 |
| chr13 | 56067301 | 56067677 |
| chr13 | 56072348 | 56072577 |
| chr13 | 56077012 | 56077164 |
| chr13 | 56080640 | 56080838 |
| chr13 | 56084112 | 56084267 |
| chr13 | 56090701 | 56090888 |
| chr13 | 56092550 | 56092929 |
| chr13 | 56094293 | 56094454 |
| chr13 | 56113517 | 56114052 |
| chr13 | 56115399 | 56115677 |
| chr13 | 56120200 | 56120350 |
| chr13 | 56134548 | 56134796 |
| chr13 | 56134796 | 56135246 |
| chr13 | 56135246 | 56136033 |
| chr13 | 56137520 | 56137745 |
| chr13 | 56142468 | 56142729 |
| chr13 | 56145640 | 56145790 |
| chr13 | 56151797 | 56152172 |
| chr13 | 56159423 | 56159588 |

|       |          |          |
|-------|----------|----------|
| chr13 | 56167551 | 56167754 |
| chr13 | 56172655 | 56172815 |
| chr13 | 56197507 | 56197792 |
| chr13 | 56197792 | 56198016 |
| chr13 | 56201400 | 56201716 |
| chr13 | 56251785 | 56251940 |
| chr13 | 56251942 | 56252092 |
| chr13 | 56266536 | 56266774 |
| chr13 | 56275224 | 56275414 |
| chr13 | 56276537 | 56276708 |
| chr13 | 56279485 | 56279936 |
| chr13 | 56279968 | 56280135 |
| chr13 | 56295851 | 56296194 |
| chr13 | 56296194 | 56296826 |
| chr13 | 56303745 | 56304097 |
| chr13 | 56304097 | 56304246 |
| chr13 | 56304246 | 56304451 |
| chr13 | 56304718 | 56304914 |
| chr13 | 56311835 | 56312069 |
| chr13 | 56327860 | 56328059 |
| chr13 | 56330810 | 56331154 |
| chr13 | 56334311 | 56334461 |
| chr13 | 56335887 | 56336153 |
| chr13 | 56345865 | 56346222 |
| chr13 | 56346475 | 56347128 |
| chr13 | 56352398 | 56352744 |
| chr13 | 56362212 | 56362651 |
| chr13 | 56362682 | 56362961 |
| chr13 | 56365685 | 56365919 |
| chr13 | 56370664 | 56370817 |
| chr13 | 56387624 | 56388041 |
| chr13 | 56396670 | 56397097 |
| chr13 | 56403983 | 56404243 |
| chr13 | 56404432 | 56404866 |
| chr13 | 56404866 | 56405350 |
| chr13 | 56412498 | 56412864 |
| chr13 | 56418616 | 56418811 |
| chr13 | 56420411 | 56420758 |
| chr13 | 56422398 | 56422634 |
| chr13 | 56425724 | 56425905 |
| chr13 | 56425965 | 56426698 |
| chr13 | 56429139 | 56429481 |



|       |          |          |
|-------|----------|----------|
| chr13 | 56429495 | 56429691 |
| chr13 | 56437832 | 56438172 |
| chr13 | 56438172 | 56438507 |
| chr13 | 56438507 | 56438747 |
| chr13 | 56438747 | 56438976 |
| chr13 | 56440872 | 56441130 |
| chr13 | 56443467 | 56443784 |
| chr13 | 56443784 | 56444039 |
| chr13 | 56444083 | 56444566 |
| chr13 | 56449566 | 56450513 |
| chr13 | 56456493 | 56456715 |
| chr13 | 56475112 | 56475357 |
| chr13 | 56475405 | 56475693 |
| chr13 | 56476544 | 56476724 |
| chr13 | 56476795 | 56477216 |
| chr13 | 56487931 | 56488321 |
| chr13 | 56501932 | 56502110 |
| chr13 | 56503011 | 56503427 |
| chr13 | 56508375 | 56508599 |
| chr13 | 56511041 | 56511211 |
| chr13 | 56516244 | 56516623 |
| chr13 | 56516840 | 56517091 |
| chr13 | 56522062 | 56522353 |
| chr13 | 56522353 | 56522809 |
| chr13 | 56522900 | 56523050 |
| chr13 | 56535724 | 56535938 |
| chr13 | 56535938 | 56536172 |
| chr13 | 56539627 | 56539836 |
| chr13 | 56549367 | 56549920 |
| chr13 | 56554467 | 56554704 |
| chr13 | 56556058 | 56556264 |
| chr13 | 56567161 | 56567311 |
| chr13 | 56575654 | 56575926 |
| chr13 | 56581407 | 56581625 |
| chr13 | 56582214 | 56582469 |
| chr13 | 56582653 | 56583140 |
| chr13 | 56585788 | 56586062 |
| chr13 | 56586147 | 56586426 |
| chr13 | 56588660 | 56588830 |
| chr13 | 56589152 | 56589454 |
| chr13 | 56601151 | 56601609 |
| chr13 | 56607339 | 56607569 |

|       |          |          |
|-------|----------|----------|
| chr13 | 56607834 | 56608148 |
| chr13 | 56608148 | 56608375 |
| chr13 | 56608981 | 56609400 |
| chr13 | 56609400 | 56609695 |
| chr13 | 56609709 | 56609894 |
| chr13 | 56614368 | 56614878 |
| chr13 | 56626336 | 56626947 |
| chr13 | 56627469 | 56627619 |
| chr13 | 56634902 | 56635172 |
| chr13 | 56635172 | 56635495 |
| chr13 | 56641201 | 56641378 |
| chr13 | 56642729 | 56642934 |
| chr13 | 56647948 | 56648420 |
| chr13 | 56648420 | 56649209 |
| chr13 | 56658142 | 56658403 |
| chr13 | 56658403 | 56658657 |
| chr13 | 56664057 | 56664242 |
| chr13 | 56664295 | 56664863 |
| chr13 | 56664863 | 56665172 |
| chr13 | 56668088 | 56668238 |
| chr13 | 56670891 | 56671078 |
| chr13 | 56679121 | 56679503 |
| chr13 | 56682224 | 56682900 |
| chr13 | 56692021 | 56692434 |
| chr13 | 56702647 | 56702875 |
| chr13 | 56702875 | 56703197 |
| chr13 | 56703197 | 56703520 |
| chr13 | 56703520 | 56703905 |
| chr13 | 56703905 | 56704339 |
| chr13 | 56718696 | 56718930 |
| chr13 | 56734732 | 56734929 |
| chr13 | 56735635 | 56735790 |
| chr13 | 56744629 | 56744846 |
| chr13 | 56744846 | 56745102 |
| chr13 | 56745102 | 56745328 |
| chr13 | 56745328 | 56745512 |
| chr13 | 56745512 | 56745707 |
| chr13 | 56758559 | 56758888 |
| chr13 | 56761134 | 56761704 |
| chr13 | 56766239 | 56766810 |
| chr13 | 56772683 | 56772915 |
| chr13 | 56786072 | 56786455 |

|       |          |          |
|-------|----------|----------|
| chr13 | 56792970 | 56793188 |
| chr13 | 56794045 | 56794302 |
| chr13 | 56794302 | 56794632 |
| chr13 | 56801612 | 56801812 |
| chr13 | 56806794 | 56807129 |
| chr13 | 56987180 | 56987438 |
| chr13 | 57017725 | 57018028 |
| chr13 | 57228349 | 57228514 |
| chr13 | 57229190 | 57229350 |
| chr13 | 57259990 | 57260240 |
| chr13 | 57269717 | 57269981 |
| chr13 | 57598081 | 57598261 |
| chr13 | 57908090 | 57908272 |
| chr13 | 57908272 | 57908534 |
| chr13 | 57909333 | 57909483 |
| chr13 | 57910426 | 57910858 |
| chr13 | 57970760 | 57970953 |
| chr13 | 57970953 | 57971238 |
| chr13 | 57971272 | 57971526 |
| chr13 | 57971614 | 57971874 |
| chr13 | 57972097 | 57972298 |
| chr13 | 58012185 | 58012454 |
| chr13 | 58031848 | 58032017 |
| chr13 | 58035565 | 58035752 |
| chr13 | 58035752 | 58035986 |
| chr13 | 58067847 | 58068079 |
| chr13 | 58113046 | 58113312 |
| chr13 | 58113429 | 58113740 |
| chr13 | 58115267 | 58115588 |
| chr13 | 58117301 | 58117451 |
| chr13 | 58120602 | 58120853 |
| chr13 | 58128021 | 58128173 |
| chr13 | 58128176 | 58128440 |
| chr13 | 58128440 | 58128764 |
| chr13 | 58128764 | 58129174 |
| chr13 | 58129174 | 58129544 |
| chr13 | 58146757 | 58147092 |
| chr13 | 58148333 | 58148570 |
| chr13 | 58148570 | 58148859 |
| chr13 | 58149073 | 58149337 |
| chr13 | 58149337 | 58149639 |
| chr13 | 58149681 | 58150027 |

|       |          |          |
|-------|----------|----------|
| chr13 | 58157463 | 58157766 |
| chr13 | 58157766 | 58158106 |
| chr13 | 58158151 | 58158386 |
| chr13 | 58158386 | 58158612 |
| chr13 | 58158612 | 58158923 |
| chr13 | 58168976 | 58169126 |
| chr13 | 58188460 | 58188778 |
| chr13 | 58189121 | 58189285 |
| chr13 | 58189559 | 58189720 |
| chr13 | 58191974 | 58192148 |
| chr13 | 58215055 | 58215304 |
| chr13 | 58215304 | 58215544 |
| chr13 | 58215544 | 58215808 |
| chr13 | 58215808 | 58216081 |
| chr13 | 58216081 | 58216383 |
| chr13 | 58232692 | 58232944 |
| chr13 | 58247439 | 58247589 |
| chr13 | 58273456 | 58273797 |
| chr13 | 58273797 | 58274087 |
| chr13 | 58274087 | 58274358 |
| chr13 | 58274358 | 58274688 |
| chr13 | 58274688 | 58274993 |
| chr13 | 58282018 | 58282264 |
| chr13 | 58287885 | 58288165 |
| chr13 | 58292863 | 58293056 |
| chr13 | 58298834 | 58299082 |
| chr13 | 58311442 | 58311670 |
| chr13 | 58334201 | 58334434 |
| chr13 | 58335977 | 58336161 |
| chr13 | 58346324 | 58346666 |
| chr13 | 58346666 | 58346990 |
| chr13 | 58346990 | 58347326 |
| chr13 | 58347326 | 58347603 |
| chr13 | 58347603 | 58347846 |
| chr13 | 58347846 | 58348207 |
| chr13 | 58348207 | 58348623 |
| chr13 | 58348623 | 58348936 |
| chr13 | 58348936 | 58349334 |
| chr13 | 58349334 | 58349730 |
| chr13 | 58349730 | 58349934 |
| chr13 | 58358668 | 58359354 |
| chr13 | 58359354 | 58359611 |

|       |          |          |
|-------|----------|----------|
| chr13 | 58384740 | 58385057 |
| chr13 | 58385057 | 58385555 |
| chr13 | 58387955 | 58388243 |
| chr13 | 58388243 | 58388477 |
| chr13 | 58388477 | 58388662 |
| chr13 | 58389158 | 58389497 |
| chr13 | 58389497 | 58389768 |
| chr13 | 58401365 | 58401676 |
| chr13 | 58401676 | 58401974 |
| chr13 | 58401974 | 58402350 |
| chr13 | 58402350 | 58402738 |
| chr13 | 58402738 | 58403051 |
| chr13 | 58403051 | 58403324 |
| chr13 | 58407599 | 58407777 |
| chr13 | 58418655 | 58418805 |
| chr13 | 58443900 | 58444130 |
| chr13 | 58458726 | 58459393 |
| chr13 | 58459909 | 58460444 |
| chr13 | 58465253 | 58465554 |
| chr13 | 58465554 | 58465792 |
| chr13 | 58465792 | 58466033 |
| chr13 | 58466033 | 58466267 |
| chr13 | 58466640 | 58466990 |
| chr13 | 58474803 | 58475080 |
| chr13 | 58475330 | 58475913 |
| chr13 | 58476053 | 58476251 |
| chr13 | 58480996 | 58481146 |
| chr13 | 58481245 | 58481692 |
| chr13 | 58500618 | 58500844 |
| chr13 | 58516292 | 58516903 |
| chr13 | 58520039 | 58520375 |
| chr13 | 58534230 | 58534722 |
| chr13 | 58534722 | 58535214 |
| chr13 | 58541716 | 58541911 |
| chr13 | 58543207 | 58543680 |
| chr13 | 58544097 | 58544284 |
| chr13 | 58545299 | 58545537 |
| chr13 | 58547584 | 58547885 |
| chr13 | 58552005 | 58552331 |
| chr13 | 58556102 | 58556317 |
| chr13 | 58588031 | 58588300 |
| chr13 | 58589171 | 58589547 |

|       |          |          |
|-------|----------|----------|
| chr13 | 58589547 | 58589843 |
| chr13 | 58590707 | 58590935 |
| chr13 | 58590935 | 58591104 |
| chr13 | 58593218 | 58593476 |
| chr13 | 58606476 | 58606926 |
| chr13 | 58622491 | 58622993 |
| chr13 | 58622993 | 58623312 |
| chr13 | 58624829 | 58625063 |
| chr13 | 58629460 | 58629679 |
| chr13 | 58630693 | 58631073 |
| chr13 | 58631073 | 58631412 |
| chr13 | 58631412 | 58631730 |
| chr13 | 58631730 | 58632088 |
| chr13 | 58637408 | 58637657 |
| chr13 | 58639037 | 58639195 |
| chr13 | 58640482 | 58640660 |
| chr13 | 58647164 | 58647343 |
| chr13 | 58653971 | 58654632 |
| chr13 | 58654632 | 58655085 |
| chr13 | 58668795 | 58668983 |
| chr13 | 58675751 | 58675906 |
| chr13 | 58716650 | 58716874 |
| chr13 | 58794178 | 58794352 |
| chr13 | 58806408 | 58806571 |
| chr13 | 58912682 | 58912837 |
| chr13 | 58971406 | 58971591 |
| chr13 | 59014967 | 59015136 |
| chr13 | 59073699 | 59073859 |
| chr13 | 59228143 | 59228616 |
| chr13 | 59308428 | 59308712 |
| chr13 | 59365547 | 59365751 |
| chr13 | 59385899 | 59386130 |
| chr13 | 59387944 | 59388229 |
| chr13 | 59392163 | 59392441 |
| chr13 | 59392868 | 59393282 |
| chr13 | 59393357 | 59393522 |
| chr13 | 59434687 | 59434866 |
| chr13 | 59452512 | 59452971 |
| chr13 | 59452971 | 59453533 |
| chr13 | 59453548 | 59453890 |
| chr13 | 59454111 | 59454320 |
| chr13 | 59455901 | 59456132 |

|       |          |          |
|-------|----------|----------|
| chr13 | 59456306 | 59456513 |
| chr13 | 59460767 | 59461292 |
| chr13 | 59461292 | 59461654 |
| chr13 | 59467712 | 59467990 |
| chr13 | 59468303 | 59468502 |
| chr13 | 59494981 | 59495132 |
| chr13 | 59509799 | 59510045 |
| chr13 | 59510045 | 59510322 |
| chr13 | 59515137 | 59515460 |
| chr13 | 59556592 | 59557108 |
| chr13 | 59557108 | 59557427 |
| chr13 | 59557427 | 59557656 |
| chr13 | 59557656 | 59557842 |
| chr13 | 59560893 | 59561048 |
| chr13 | 59561504 | 59561944 |
| chr13 | 59562571 | 59562794 |
| chr13 | 59584465 | 59584760 |
| chr13 | 59584970 | 59585418 |
| chr13 | 59585418 | 59586009 |
| chr13 | 59604272 | 59604537 |
| chr13 | 59604537 | 59604914 |
| chr13 | 59624428 | 59624812 |
| chr13 | 59624824 | 59625240 |
| chr13 | 59632575 | 59632727 |
| chr13 | 59633618 | 59633752 |
| chr13 | 59633752 | 59633892 |
| chr13 | 59647103 | 59647297 |
| chr13 | 59647906 | 59648096 |
| chr13 | 59656458 | 59656807 |
| chr13 | 59656809 | 59656964 |
| chr13 | 59660460 | 59660622 |
| chr13 | 59663291 | 59663571 |
| chr13 | 59663571 | 59663930 |
| chr13 | 59663984 | 59664240 |
| chr13 | 59668369 | 59668948 |
| chr13 | 59668948 | 59669417 |
| chr13 | 59674213 | 59674436 |
| chr13 | 59674759 | 59675123 |
| chr13 | 59675331 | 59676054 |
| chr13 | 59679430 | 59679732 |
| chr13 | 59683761 | 59684048 |
| chr13 | 59718816 | 59719121 |

|       |          |          |
|-------|----------|----------|
| chr13 | 59728315 | 59728755 |
| chr13 | 59728765 | 59729098 |
| chr13 | 59735272 | 59735520 |
| chr13 | 59738165 | 59738431 |
| chr13 | 59738431 | 59738609 |
| chr13 | 59746247 | 59746460 |
| chr13 | 59746758 | 59747159 |
| chr13 | 59753532 | 59753733 |
| chr13 | 59769269 | 59769485 |
| chr13 | 59769485 | 59769734 |
| chr13 | 59769734 | 59770119 |
| chr13 | 59770119 | 59770573 |
| chr13 | 59779321 | 59779525 |
| chr13 | 59822508 | 59822758 |
| chr13 | 59822758 | 59823018 |
| chr13 | 59823018 | 59823454 |
| chr13 | 59829040 | 59829285 |
| chr13 | 59834756 | 59835010 |
| chr13 | 59835213 | 59835415 |
| chr13 | 59836053 | 59836310 |
| chr13 | 59840482 | 59840716 |
| chr13 | 59840797 | 59841134 |
| chr13 | 59842270 | 59842455 |
| chr13 | 59842553 | 59842808 |
| chr13 | 59842877 | 59843143 |
| chr13 | 59853543 | 59853793 |
| chr13 | 59856370 | 59856603 |
| chr13 | 59870060 | 59870316 |
| chr13 | 59875640 | 59875843 |
| chr13 | 59889827 | 59890018 |
| chr13 | 60019624 | 60019781 |
| chr13 | 60019871 | 60020131 |
| chr13 | 60096704 | 60097644 |
| chr13 | 60098526 | 60098685 |
| chr13 | 60110494 | 60110794 |
| chr13 | 60166484 | 60166755 |
| chr13 | 60176108 | 60176455 |
| chr13 | 60176455 | 60176890 |
| chr13 | 60176890 | 60177364 |
| chr13 | 60177448 | 60177664 |
| chr13 | 60177664 | 60177890 |
| chr13 | 60178176 | 60178347 |



|       |          |          |
|-------|----------|----------|
| chr13 | 60178498 | 60178774 |
| chr13 | 60195866 | 60196081 |
| chr13 | 60196146 | 60196302 |
| chr13 | 60221692 | 60221894 |
| chr13 | 60427168 | 60427472 |
| chr13 | 60427737 | 60428083 |
| chr13 | 60428083 | 60428410 |
| chr13 | 60431479 | 60431845 |
| chr13 | 60431890 | 60432120 |
| chr13 | 60438300 | 60438511 |
| chr13 | 60453883 | 60454158 |
| chr13 | 60454158 | 60454627 |
| chr13 | 60455039 | 60455195 |
| chr13 | 60455313 | 60455487 |
| chr13 | 60460665 | 60460866 |
| chr13 | 60464542 | 60464736 |
| chr13 | 60479036 | 60479292 |
| chr13 | 60479478 | 60479944 |
| chr13 | 60548150 | 60548300 |
| chr13 | 60558475 | 60558656 |
| chr13 | 60601693 | 60602024 |
| chr13 | 60602024 | 60602355 |
| chr13 | 60602355 | 60602878 |
| chr13 | 60608539 | 60608700 |
| chr13 | 60617852 | 60618071 |
| chr13 | 60618441 | 60618707 |
| chr13 | 60644675 | 60645005 |
| chr13 | 60662533 | 60662882 |
| chr13 | 60662882 | 60663256 |
| chr13 | 60664251 | 60664614 |
| chr13 | 60672291 | 60672743 |
| chr13 | 60672815 | 60673163 |
| chr13 | 60676526 | 60676723 |
| chr13 | 60680963 | 60681180 |
| chr13 | 60681180 | 60681483 |
| chr13 | 60681483 | 60681815 |
| chr13 | 60681815 | 60682209 |
| chr13 | 60683145 | 60683498 |
| chr13 | 60684197 | 60684614 |
| chr13 | 60728281 | 60728783 |
| chr13 | 60728857 | 60729122 |
| chr13 | 60737711 | 60737922 |

|       |          |          |
|-------|----------|----------|
| chr13 | 60737922 | 60738422 |
| chr13 | 60738429 | 60738771 |
| chr13 | 60744013 | 60744231 |
| chr13 | 60744231 | 60744477 |
| chr13 | 60748615 | 60748946 |
| chr13 | 60752355 | 60752724 |
| chr13 | 60757188 | 60757576 |
| chr13 | 60759255 | 60759406 |
| chr13 | 60799723 | 60799997 |
| chr13 | 60812941 | 60813152 |
| chr13 | 60813760 | 60814129 |
| chr13 | 60820515 | 60820804 |
| chr13 | 60820804 | 60821336 |
| chr13 | 60848300 | 60848516 |
| chr13 | 60854328 | 60854721 |
| chr13 | 60855076 | 60855358 |
| chr13 | 60855451 | 60855613 |
| chr13 | 60864328 | 60864655 |
| chr13 | 60864732 | 60864917 |
| chr13 | 60864917 | 60865249 |
| chr13 | 60866291 | 60866529 |
| chr13 | 60897256 | 60897712 |
| chr13 | 60897712 | 60898074 |
| chr13 | 60932388 | 60932852 |
| chr13 | 60936391 | 60937042 |
| chr13 | 60953378 | 60953601 |
| chr13 | 60953880 | 60954130 |
| chr13 | 60956735 | 60956902 |
| chr13 | 60956960 | 60957398 |
| chr13 | 60959204 | 60959535 |
| chr13 | 60959535 | 60959784 |
| chr13 | 60963919 | 60964110 |
| chr13 | 60964112 | 60964392 |
| chr13 | 60972458 | 60972638 |
| chr13 | 60987012 | 60987249 |
| chr13 | 61018056 | 61018304 |
| chr13 | 61241594 | 61241861 |
| chr13 | 61265875 | 61266168 |
| chr13 | 61266339 | 61266520 |
| chr13 | 61375487 | 61375917 |
| chr13 | 61375917 | 61376210 |
| chr13 | 61433176 | 61433579 |

|       |          |          |
|-------|----------|----------|
| chr13 | 61451569 | 61452238 |
| chr13 | 61535054 | 61535384 |
| chr13 | 61542419 | 61542623 |
| chr13 | 61710903 | 61711223 |
| chr13 | 61725652 | 61725883 |
| chr13 | 61725883 | 61726164 |
| chr13 | 61803878 | 61804108 |
| chr13 | 61804108 | 61804355 |
| chr13 | 61804355 | 61804562 |
| chr13 | 61804562 | 61804759 |
| chr13 | 61998457 | 61998612 |
| chr13 | 61998789 | 61999127 |
| chr13 | 62015515 | 62015752 |
| chr13 | 62015752 | 62016000 |
| chr13 | 62016000 | 62016203 |
| chr13 | 62016203 | 62016398 |
| chr13 | 62037473 | 62038057 |
| chr13 | 62082263 | 62082503 |
| chr13 | 62083691 | 62084239 |
| chr13 | 62093262 | 62093472 |
| chr13 | 62129706 | 62130063 |
| chr13 | 62130063 | 62130371 |
| chr13 | 62153238 | 62153492 |
| chr13 | 62153500 | 62153661 |
| chr13 | 62285706 | 62285864 |
| chr13 | 62291870 | 62292080 |
| chr13 | 62293465 | 62293905 |
| chr13 | 62296433 | 62296679 |
| chr13 | 62382735 | 62383138 |
| chr13 | 62383138 | 62383370 |
| chr13 | 62383370 | 62383592 |
| chr13 | 62466372 | 62466754 |
| chr13 | 62466754 | 62467006 |
| chr13 | 62467006 | 62467238 |
| chr13 | 62558152 | 62558444 |
| chr13 | 62558444 | 62558783 |
| chr13 | 62558783 | 62559024 |
| chr13 | 62623881 | 62624358 |
| chr13 | 62652768 | 62653070 |
| chr13 | 62653070 | 62653403 |
| chr13 | 62653403 | 62653637 |
| chr13 | 62684486 | 62685121 |

|       |          |          |
|-------|----------|----------|
| chr13 | 62685121 | 62685364 |
| chr13 | 62760252 | 62760407 |
| chr13 | 62760420 | 62760901 |
| chr13 | 62785299 | 62785476 |
| chr13 | 62785488 | 62785996 |
| chr13 | 62785998 | 62786212 |
| chr13 | 62807993 | 62808218 |
| chr13 | 62812933 | 62813114 |
| chr13 | 62834523 | 62834719 |
| chr13 | 62856220 | 62856486 |
| chr13 | 62856486 | 62856729 |
| chr13 | 62858295 | 62858581 |
| chr13 | 62858581 | 62858869 |
| chr13 | 62877346 | 62877540 |
| chr13 | 62919698 | 62919909 |
| chr13 | 62920020 | 62920246 |
| chr13 | 62926547 | 62926801 |
| chr13 | 62964640 | 62965433 |
| chr13 | 62980447 | 62980746 |
| chr13 | 63031394 | 63031658 |
| chr13 | 63031658 | 63031909 |
| chr13 | 63038541 | 63038691 |
| chr13 | 63045887 | 63046254 |
| chr13 | 63046254 | 63046577 |
| chr13 | 63046577 | 63046980 |
| chr13 | 63047050 | 63047295 |
| chr13 | 63066368 | 63066663 |
| chr13 | 63066663 | 63066926 |
| chr13 | 63066926 | 63067137 |
| chr13 | 63072388 | 63072735 |
| chr13 | 63082626 | 63082776 |
| chr13 | 63087944 | 63088362 |
| chr13 | 63088362 | 63088669 |
| chr13 | 63088838 | 63089152 |
| chr13 | 63089152 | 63089516 |
| chr13 | 63092359 | 63092642 |
| chr13 | 63093002 | 63093217 |
| chr13 | 63093508 | 63093946 |
| chr13 | 63106603 | 63106936 |
| chr13 | 63109494 | 63109746 |
| chr13 | 63117883 | 63118053 |
| chr13 | 63120391 | 63120557 |

|       |          |          |
|-------|----------|----------|
| chr13 | 63121133 | 63121364 |
| chr13 | 63134811 | 63135442 |
| chr13 | 63140820 | 63141261 |
| chr13 | 63141447 | 63141657 |
| chr13 | 63146060 | 63146275 |
| chr13 | 63154605 | 63154875 |
| chr13 | 63154875 | 63155416 |
| chr13 | 63164199 | 63164349 |
| chr13 | 63165412 | 63165567 |
| chr13 | 63165733 | 63166175 |
| chr13 | 63176356 | 63176513 |
| chr13 | 63177354 | 63177510 |
| chr13 | 63182062 | 63182238 |
| chr13 | 63186847 | 63187552 |
| chr13 | 63187552 | 63187977 |
| chr13 | 63193439 | 63193982 |
| chr13 | 63205723 | 63206069 |
| chr13 | 63214792 | 63215209 |
| chr13 | 63216452 | 63216871 |
| chr13 | 63216871 | 63217229 |
| chr13 | 63221972 | 63222155 |
| chr13 | 63230925 | 63231286 |
| chr13 | 63231286 | 63231685 |
| chr13 | 63231731 | 63231967 |
| chr13 | 63239546 | 63239797 |
| chr13 | 63239808 | 63240254 |
| chr13 | 63240268 | 63240478 |
| chr13 | 63240481 | 63240663 |
| chr13 | 63240879 | 63241187 |
| chr13 | 63241187 | 63241492 |
| chr13 | 63243599 | 63243961 |
| chr13 | 63251583 | 63251805 |
| chr13 | 63253128 | 63253532 |
| chr13 | 63254002 | 63254204 |
| chr13 | 63254419 | 63254605 |
| chr13 | 63255442 | 63255644 |
| chr13 | 63255644 | 63255787 |
| chr13 | 63255804 | 63256146 |
| chr13 | 63256794 | 63257147 |
| chr13 | 63258171 | 63258693 |
| chr13 | 63266168 | 63266667 |
| chr13 | 63270336 | 63270493 |

|       |          |          |
|-------|----------|----------|
| chr13 | 63272375 | 63273323 |
| chr13 | 63274002 | 63274202 |
| chr13 | 63284435 | 63284590 |
| chr13 | 63297089 | 63297420 |
| chr13 | 63303460 | 63303728 |
| chr13 | 63304004 | 63304427 |
| chr13 | 63304427 | 63304773 |
| chr13 | 63304778 | 63305089 |
| chr13 | 63305089 | 63305504 |
| chr13 | 63311184 | 63311497 |
| chr13 | 63316456 | 63316670 |
| chr13 | 63318675 | 63318970 |
| chr13 | 63319037 | 63319460 |
| chr13 | 63324895 | 63325209 |
| chr13 | 63325256 | 63325584 |
| chr13 | 63331484 | 63331701 |
| chr13 | 63332678 | 63332899 |
| chr13 | 63335827 | 63336077 |
| chr13 | 63341626 | 63341841 |
| chr13 | 63347763 | 63347951 |
| chr13 | 63356627 | 63356861 |
| chr13 | 63365362 | 63365617 |
| chr13 | 63421293 | 63421518 |
| chr13 | 63430766 | 63431041 |
| chr13 | 63431041 | 63431364 |
| chr13 | 63431364 | 63431651 |
| chr13 | 63431651 | 63432071 |
| chr13 | 63432851 | 63433025 |
| chr13 | 63480137 | 63480369 |
| chr13 | 63500649 | 63500801 |
| chr13 | 63507965 | 63508115 |
| chr13 | 63513243 | 63513403 |
| chr13 | 63513549 | 63513699 |
| chr13 | 63520952 | 63521400 |
| chr13 | 63548425 | 63549066 |
| chr13 | 63556540 | 63556690 |
| chr13 | 63563061 | 63563249 |
| chr13 | 63563278 | 63563585 |
| chr13 | 63563782 | 63563973 |
| chr13 | 63564178 | 63564409 |
| chr13 | 63564852 | 63565262 |
| chr13 | 63565338 | 63565747 |

|       |          |          |
|-------|----------|----------|
| chr13 | 63565918 | 63566182 |
| chr13 | 63566184 | 63566497 |
| chr13 | 63567809 | 63568297 |
| chr13 | 63572986 | 63573228 |
| chr13 | 63573549 | 63573699 |
| chr13 | 63578811 | 63579317 |
| chr13 | 63581205 | 63581436 |
| chr13 | 63614513 | 63615004 |
| chr13 | 63623832 | 63624134 |
| chr13 | 63642624 | 63642958 |
| chr13 | 63642958 | 63643310 |
| chr13 | 63643343 | 63643764 |
| chr13 | 63644312 | 63644635 |
| chr13 | 63654568 | 63654840 |
| chr13 | 63657186 | 63657567 |
| chr13 | 63672465 | 63672702 |
| chr13 | 63682288 | 63682696 |
| chr13 | 63696497 | 63696711 |
| chr13 | 63700774 | 63701159 |
| chr13 | 63701855 | 63702108 |
| chr13 | 63716522 | 63716745 |
| chr13 | 63724237 | 63724687 |
| chr13 | 63724699 | 63725049 |
| chr13 | 63737239 | 63737818 |
| chr13 | 63737818 | 63738175 |
| chr13 | 63748881 | 63749215 |
| chr13 | 63749215 | 63749506 |
| chr13 | 63749960 | 63750480 |
| chr13 | 63756137 | 63756346 |
| chr13 | 63770928 | 63771212 |
| chr13 | 63771212 | 63771469 |
| chr13 | 63814771 | 63815088 |
| chr13 | 63815088 | 63815411 |
| chr13 | 63815411 | 63815732 |
| chr13 | 63845823 | 63846065 |
| chr13 | 63847069 | 63847479 |
| chr13 | 63865440 | 63865675 |
| chr13 | 63879148 | 63879534 |
| chr13 | 63915978 | 63916183 |
| chr13 | 63916595 | 63916933 |
| chr13 | 63916969 | 63917620 |
| chr13 | 63929492 | 63929652 |

|       |          |          |
|-------|----------|----------|
| chr13 | 63954380 | 63954617 |
| chr13 | 63975150 | 63975322 |
| chr13 | 63994998 | 63995175 |
| chr13 | 63999426 | 63999728 |
| chr13 | 64002970 | 64003145 |
| chr13 | 64004292 | 64004527 |
| chr13 | 64011881 | 64012048 |
| chr13 | 64030860 | 64031054 |
| chr13 | 64036206 | 64036389 |
| chr13 | 64036411 | 64036673 |
| chr13 | 64038256 | 64038434 |
| chr13 | 64049634 | 64049844 |
| chr13 | 64052125 | 64052293 |
| chr13 | 64052383 | 64052533 |
| chr13 | 64076155 | 64076408 |
| chr13 | 64076408 | 64076715 |
| chr13 | 64077692 | 64077902 |
| chr13 | 64093399 | 64093627 |
| chr13 | 64100240 | 64100546 |
| chr13 | 64105031 | 64105215 |
| chr13 | 64105693 | 64106143 |
| chr13 | 64106145 | 64106312 |
| chr13 | 64106312 | 64106410 |
| chr13 | 64115498 | 64115753 |
| chr13 | 64123974 | 64124150 |
| chr13 | 64129087 | 64129560 |
| chr13 | 64129631 | 64129878 |
| chr13 | 64129916 | 64130068 |
| chr13 | 64152223 | 64152601 |
| chr13 | 64152601 | 64152874 |
| chr13 | 64153088 | 64153471 |
| chr13 | 64153471 | 64153809 |
| chr13 | 64153849 | 64154297 |
| chr13 | 64155178 | 64155602 |
| chr13 | 64161420 | 64162011 |
| chr13 | 64162011 | 64162489 |
| chr13 | 64180369 | 64180597 |
| chr13 | 64180900 | 64181272 |
| chr13 | 64191200 | 64191370 |
| chr13 | 64191370 | 64191583 |
| chr13 | 64204835 | 64205039 |
| chr13 | 64205257 | 64205470 |



|       |          |          |
|-------|----------|----------|
| chr13 | 64248314 | 64248529 |
| chr13 | 64248529 | 64248836 |
| chr13 | 64248836 | 64249164 |
| chr13 | 64252179 | 64252521 |
| chr13 | 64258021 | 64258224 |
| chr13 | 64267234 | 64267434 |
| chr13 | 64274137 | 64274338 |
| chr13 | 64274368 | 64274833 |
| chr13 | 64274833 | 64275182 |
| chr13 | 64275182 | 64275440 |
| chr13 | 64275512 | 64275669 |
| chr13 | 64284779 | 64284935 |
| chr13 | 64294584 | 64294781 |
| chr13 | 64295252 | 64295417 |
| chr13 | 64306015 | 64306438 |
| chr13 | 64310727 | 64310968 |
| chr13 | 64311351 | 64311679 |
| chr13 | 64312086 | 64312419 |
| chr13 | 64312419 | 64313029 |
| chr13 | 64314890 | 64315098 |
| chr13 | 64315618 | 64315783 |
| chr13 | 64320138 | 64320316 |
| chr13 | 64327120 | 64327353 |
| chr13 | 64332080 | 64332302 |
| chr13 | 64332368 | 64332710 |
| chr13 | 64337291 | 64337507 |
| chr13 | 64337663 | 64338035 |
| chr13 | 64338035 | 64338298 |
| chr13 | 64349470 | 64349875 |
| chr13 | 64350298 | 64350522 |
| chr13 | 64350798 | 64351127 |
| chr13 | 64360661 | 64360873 |
| chr13 | 64360873 | 64361086 |
| chr13 | 64361086 | 64361489 |
| chr13 | 64361540 | 64361789 |
| chr13 | 64362004 | 64362175 |
| chr13 | 64364316 | 64364584 |
| chr13 | 64369802 | 64370165 |
| chr13 | 64370165 | 64370547 |
| chr13 | 64370547 | 64370878 |
| chr13 | 64377409 | 64377634 |
| chr13 | 64377634 | 64377972 |

|       |          |          |
|-------|----------|----------|
| chr13 | 64382828 | 64383168 |
| chr13 | 64388221 | 64388840 |
| chr13 | 64388961 | 64389169 |
| chr13 | 64396116 | 64396370 |
| chr13 | 64396998 | 64397171 |
| chr13 | 64398107 | 64398403 |
| chr13 | 64401134 | 64401386 |
| chr13 | 64405185 | 64405365 |
| chr13 | 64406635 | 64407107 |
| chr13 | 64420899 | 64421165 |
| chr13 | 64421354 | 64421788 |
| chr13 | 64421992 | 64422276 |
| chr13 | 64422276 | 64422555 |
| chr13 | 64422655 | 64422901 |
| chr13 | 64432122 | 64432610 |
| chr13 | 64432610 | 64432954 |
| chr13 | 64432954 | 64433162 |
| chr13 | 64438979 | 64439448 |
| chr13 | 64439451 | 64439857 |
| chr13 | 64443362 | 64443587 |
| chr13 | 64447987 | 64448287 |
| chr13 | 64489812 | 64489999 |
| chr13 | 64490020 | 64490223 |
| chr13 | 64495728 | 64495932 |
| chr13 | 64559730 | 64559923 |
| chr13 | 64573827 | 64574003 |
| chr13 | 64685202 | 64685532 |
| chr13 | 64685532 | 64685792 |
| chr13 | 64989592 | 64989821 |
| chr13 | 65058177 | 65058450 |
| chr13 | 65112104 | 65112288 |
| chr13 | 65112410 | 65112803 |
| chr13 | 65112803 | 65113241 |
| chr13 | 65176243 | 65176505 |
| chr13 | 65218334 | 65218521 |
| chr13 | 65240401 | 65240992 |
| chr13 | 65240992 | 65241525 |
| chr13 | 65241525 | 65241768 |
| chr13 | 65241928 | 65242186 |
| chr13 | 65258082 | 65258609 |
| chr13 | 65278138 | 65278290 |
| chr13 | 65278354 | 65278633 |

|       |          |          |
|-------|----------|----------|
| chr13 | 65278633 | 65278903 |
| chr13 | 65278903 | 65279140 |
| chr13 | 65279140 | 65279412 |
| chr13 | 65484998 | 65485204 |
| chr13 | 65530729 | 65530903 |
| chr13 | 65586328 | 65586510 |
| chr13 | 65620403 | 65620611 |
| chr13 | 65990952 | 65991494 |
| chr13 | 66007593 | 66007800 |
| chr13 | 66385843 | 66386226 |
| chr13 | 66457960 | 66458137 |
| chr13 | 66556561 | 66556757 |
| chr13 | 66625383 | 66626018 |
| chr13 | 66768696 | 66769199 |
| chr13 | 66771233 | 66771406 |
| chr13 | 66904755 | 66905213 |
| chr13 | 66905213 | 66905503 |
| chr13 | 66905503 | 66905700 |
| chr13 | 66932654 | 66932928 |
| chr13 | 66932928 | 66933223 |
| chr13 | 66933223 | 66933583 |
| chr13 | 66933583 | 66934045 |
| chr13 | 66984395 | 66984877 |
| chr13 | 66984877 | 66985160 |
| chr13 | 66991730 | 66991889 |
| chr13 | 67060099 | 67060619 |
| chr13 | 67060619 | 67061339 |
| chr13 | 67080972 | 67081454 |
| chr13 | 67081454 | 67081723 |
| chr13 | 67082090 | 67082256 |
| chr13 | 67108075 | 67108507 |
| chr13 | 67108507 | 67108874 |
| chr13 | 67108885 | 67109111 |
| chr13 | 67113365 | 67113629 |
| chr13 | 67113711 | 67113967 |
| chr13 | 67128008 | 67128288 |
| chr13 | 67128288 | 67128536 |
| chr13 | 67128536 | 67128807 |
| chr13 | 67167821 | 67168028 |
| chr13 | 67172960 | 67173260 |
| chr13 | 67173260 | 67173495 |
| chr13 | 67173495 | 67173758 |

|       |          |          |
|-------|----------|----------|
| chr13 | 67194322 | 67194579 |
| chr13 | 67194579 | 67195047 |
| chr13 | 67268673 | 67269066 |
| chr13 | 67269066 | 67269419 |
| chr13 | 67269431 | 67269700 |
| chr13 | 67269700 | 67269929 |
| chr13 | 67278362 | 67278694 |
| chr13 | 67305926 | 67306385 |
| chr13 | 67306385 | 67306659 |
| chr13 | 67332084 | 67332510 |
| chr13 | 67332510 | 67332851 |
| chr13 | 67353551 | 67353909 |
| chr13 | 67354403 | 67354580 |
| chr13 | 67359897 | 67360104 |
| chr13 | 67360104 | 67360300 |
| chr13 | 67360300 | 67360519 |
| chr13 | 67360519 | 67360828 |
| chr13 | 67375201 | 67375465 |
| chr13 | 67375465 | 67375704 |
| chr13 | 67375704 | 67376000 |
| chr13 | 67376400 | 67376569 |
| chr13 | 67399131 | 67399461 |
| chr13 | 67399461 | 67399694 |
| chr13 | 67399694 | 67399989 |
| chr13 | 67413762 | 67413953 |
| chr13 | 67420947 | 67421354 |
| chr13 | 67421354 | 67421571 |
| chr13 | 67421571 | 67421774 |
| chr13 | 67451125 | 67451801 |
| chr13 | 67483725 | 67483949 |
| chr13 | 67483949 | 67484167 |
| chr13 | 67484167 | 67484449 |
| chr13 | 67500013 | 67500400 |
| chr13 | 67500400 | 67500730 |
| chr13 | 67525626 | 67526073 |
| chr13 | 67526073 | 67526381 |
| chr13 | 67552592 | 67553052 |
| chr13 | 67553052 | 67553375 |
| chr13 | 67572527 | 67573185 |
| chr13 | 67579914 | 67580064 |
| chr13 | 67609116 | 67609530 |
| chr13 | 67609530 | 67609971 |

|       |          |          |
|-------|----------|----------|
| chr13 | 67637193 | 67637609 |
| chr13 | 67637609 | 67637996 |
| chr13 | 67668975 | 67669192 |
| chr13 | 67683011 | 67683462 |
| chr13 | 67683462 | 67683756 |
| chr13 | 67683917 | 67684165 |
| chr13 | 67723778 | 67724152 |
| chr13 | 67724152 | 67724513 |
| chr13 | 67728696 | 67728907 |
| chr13 | 67728907 | 67729113 |
| chr13 | 67729113 | 67729369 |
| chr13 | 67729504 | 67729805 |
| chr13 | 67754616 | 67754868 |
| chr13 | 67754868 | 67755085 |
| chr13 | 67755085 | 67755356 |
| chr13 | 67766983 | 67767278 |
| chr13 | 67779388 | 67779812 |
| chr13 | 67779812 | 67780052 |
| chr13 | 67780052 | 67780315 |
| chr13 | 67787994 | 67788225 |
| chr13 | 67791270 | 67791586 |
| chr13 | 67813625 | 67813910 |
| chr13 | 67813910 | 67814343 |
| chr13 | 67814402 | 67814581 |
| chr13 | 67818773 | 67818958 |
| chr13 | 67830953 | 67831108 |
| chr13 | 67831153 | 67831379 |
| chr13 | 67833216 | 67833453 |
| chr13 | 67843127 | 67843440 |
| chr13 | 67844057 | 67844466 |
| chr13 | 67844466 | 67844726 |
| chr13 | 67870695 | 67871005 |
| chr13 | 67876411 | 67876771 |
| chr13 | 67887442 | 67887691 |
| chr13 | 67889064 | 67889253 |
| chr13 | 67891875 | 67892025 |
| chr13 | 67996427 | 67996577 |
| chr13 | 68015377 | 68015974 |
| chr13 | 68043769 | 68044089 |
| chr13 | 68044089 | 68044458 |
| chr13 | 68049814 | 68049964 |
| chr13 | 68093218 | 68093683 |

|       |          |          |
|-------|----------|----------|
| chr13 | 68094951 | 68095101 |
| chr13 | 68116875 | 68117184 |
| chr13 | 68173604 | 68173812 |
| chr13 | 68213368 | 68213618 |
| chr13 | 68214917 | 68215421 |
| chr13 | 68217811 | 68218055 |
| chr13 | 68218351 | 68218559 |
| chr13 | 68233147 | 68233396 |
| chr13 | 68234600 | 68235094 |
| chr13 | 68235994 | 68236226 |
| chr13 | 68238047 | 68238356 |
| chr13 | 68258055 | 68258711 |
| chr13 | 68258842 | 68259039 |
| chr13 | 68259329 | 68259479 |
| chr13 | 68261579 | 68261909 |
| chr13 | 68296182 | 68296332 |
| chr13 | 68299028 | 68299534 |
| chr13 | 68300682 | 68300982 |
| chr13 | 68451568 | 68451732 |
| chr13 | 68530466 | 68530620 |
| chr13 | 68553472 | 68553722 |
| chr13 | 68558637 | 68558819 |
| chr13 | 68569657 | 68569942 |
| chr13 | 68581710 | 68582580 |
| chr13 | 68582585 | 68582892 |
| chr13 | 68597714 | 68598043 |
| chr13 | 68601305 | 68601473 |
| chr13 | 68605636 | 68606145 |
| chr13 | 68606937 | 68607097 |
| chr13 | 68608630 | 68608879 |
| chr13 | 68622429 | 68622713 |
| chr13 | 68655676 | 68655881 |
| chr13 | 68669517 | 68669677 |
| chr13 | 69293986 | 69294174 |
| chr13 | 69339843 | 69340028 |
| chr13 | 69386500 | 69386694 |
| chr13 | 69386767 | 69386981 |
| chr13 | 69386981 | 69387184 |
| chr13 | 69427214 | 69427536 |
| chr13 | 69431607 | 69431972 |
| chr13 | 69460205 | 69460357 |
| chr13 | 69463952 | 69464102 |

|       |          |          |
|-------|----------|----------|
| chr13 | 69488636 | 69489415 |
| chr13 | 69489573 | 69490083 |
| chr13 | 69509472 | 69509682 |
| chr13 | 69509682 | 69509930 |
| chr13 | 69509930 | 69510285 |
| chr13 | 69516893 | 69517175 |
| chr13 | 69517175 | 69517490 |
| chr13 | 69517490 | 69517828 |
| chr13 | 69517873 | 69518338 |
| chr13 | 69523983 | 69524530 |
| chr13 | 69524530 | 69524809 |
| chr13 | 69531554 | 69531755 |
| chr13 | 69533471 | 69533640 |
| chr13 | 69534262 | 69534639 |
| chr13 | 69534639 | 69535089 |
| chr13 | 69535089 | 69535555 |
| chr13 | 69538455 | 69538605 |
| chr13 | 69540913 | 69541215 |
| chr13 | 69541215 | 69541634 |
| chr13 | 69541634 | 69542080 |
| chr13 | 69543098 | 69543312 |
| chr13 | 69545057 | 69545314 |
| chr13 | 69553163 | 69553367 |
| chr13 | 69563228 | 69563420 |
| chr13 | 69585558 | 69585850 |
| chr13 | 69585850 | 69586189 |
| chr13 | 69586189 | 69586434 |
| chr13 | 69586532 | 69586746 |
| chr13 | 69592980 | 69593376 |
| chr13 | 69593376 | 69593919 |
| chr13 | 69594878 | 69595237 |
| chr13 | 69598868 | 69599342 |
| chr13 | 69599422 | 69599678 |
| chr13 | 69604189 | 69604687 |
| chr13 | 69604687 | 69604986 |
| chr13 | 69610665 | 69610903 |
| chr13 | 69610954 | 69611223 |
| chr13 | 69611223 | 69611487 |
| chr13 | 69611487 | 69611862 |
| chr13 | 69611945 | 69612175 |
| chr13 | 69614959 | 69615114 |
| chr13 | 69621697 | 69621847 |

|       |          |          |
|-------|----------|----------|
| chr13 | 69628098 | 69628284 |
| chr13 | 69629157 | 69629330 |
| chr13 | 69629493 | 69629800 |
| chr13 | 69629836 | 69629998 |
| chr13 | 69635892 | 69636115 |
| chr13 | 69637766 | 69637945 |
| chr13 | 69642350 | 69642592 |
| chr13 | 69642615 | 69643288 |
| chr13 | 69643403 | 69643648 |
| chr13 | 69655406 | 69655772 |
| chr13 | 69657807 | 69658084 |
| chr13 | 69682551 | 69682718 |
| chr13 | 69687130 | 69687332 |
| chr13 | 69690018 | 69690378 |
| chr13 | 69691147 | 69691330 |
| chr13 | 69696402 | 69696641 |
| chr13 | 69738565 | 69738754 |
| chr13 | 69738858 | 69739008 |
| chr13 | 69739391 | 69739740 |
| chr13 | 69739740 | 69740171 |
| chr13 | 69767401 | 69767708 |
| chr13 | 69767708 | 69768032 |
| chr13 | 69768148 | 69768572 |
| chr13 | 69770546 | 69770968 |
| chr13 | 69780401 | 69780716 |
| chr13 | 69791820 | 69792053 |
| chr13 | 69792471 | 69792729 |
| chr13 | 69809665 | 69810152 |
| chr13 | 69810152 | 69810695 |
| chr13 | 69821284 | 69821445 |
| chr13 | 69821520 | 69821757 |
| chr13 | 69896676 | 69896831 |
| chr13 | 69963761 | 69964031 |
| chr13 | 69991317 | 69991604 |
| chr13 | 70003505 | 70003956 |
| chr13 | 70032302 | 70032481 |
| chr13 | 70168694 | 70168868 |
| chr13 | 70195710 | 70196207 |
| chr13 | 70212919 | 70213380 |
| chr13 | 70213380 | 70213599 |
| chr13 | 70213708 | 70213953 |
| chr13 | 70230242 | 70230421 |



|       |          |          |
|-------|----------|----------|
| chr13 | 70234415 | 70234751 |
| chr13 | 70439538 | 70439688 |
| chr13 | 70459094 | 70459297 |
| chr13 | 70479320 | 70479508 |
| chr13 | 70497298 | 70497629 |
| chr13 | 70508694 | 70509199 |
| chr13 | 70536024 | 70536323 |
| chr13 | 70567241 | 70567408 |
| chr13 | 70574292 | 70574598 |
| chr13 | 70587067 | 70587307 |
| chr13 | 70590201 | 70590488 |
| chr13 | 70590488 | 70590876 |
| chr13 | 70600065 | 70600698 |
| chr13 | 70604810 | 70605002 |
| chr13 | 70611097 | 70611382 |
| chr13 | 70621466 | 70621924 |
| chr13 | 70626590 | 70626811 |
| chr13 | 70635808 | 70636082 |
| chr13 | 70637272 | 70637491 |
| chr13 | 70637491 | 70637675 |
| chr13 | 70637675 | 70638003 |
| chr13 | 70638003 | 70638408 |
| chr13 | 70641432 | 70641635 |
| chr13 | 70643504 | 70643705 |
| chr13 | 70643739 | 70644092 |
| chr13 | 70644133 | 70644372 |
| chr13 | 70645287 | 70645498 |
| chr13 | 70654229 | 70654778 |
| chr13 | 70655553 | 70655928 |
| chr13 | 70657613 | 70658088 |
| chr13 | 70658088 | 70658362 |
| chr13 | 70667007 | 70667161 |
| chr13 | 70669862 | 70670587 |
| chr13 | 70680981 | 70681391 |
| chr13 | 70681391 | 70681734 |
| chr13 | 70681844 | 70682259 |
| chr13 | 70686529 | 70686682 |
| chr13 | 70688578 | 70688866 |
| chr13 | 70688933 | 70689162 |
| chr13 | 70689258 | 70689520 |
| chr13 | 70689520 | 70689852 |
| chr13 | 70690048 | 70690336 |

|       |          |          |
|-------|----------|----------|
| chr13 | 70690541 | 70690771 |
| chr13 | 70698842 | 70699008 |
| chr13 | 70713301 | 70713774 |
| chr13 | 70716111 | 70716307 |
| chr13 | 70724287 | 70724614 |
| chr13 | 70724614 | 70724892 |
| chr13 | 70724892 | 70725313 |
| chr13 | 70730098 | 70730397 |
| chr13 | 70731329 | 70731815 |
| chr13 | 70731890 | 70732275 |
| chr13 | 70732837 | 70733091 |
| chr13 | 70733965 | 70734343 |
| chr13 | 70734731 | 70734885 |
| chr13 | 70744376 | 70744543 |
| chr13 | 70744978 | 70745166 |
| chr13 | 70767577 | 70767745 |
| chr13 | 70772545 | 70772696 |
| chr13 | 70773311 | 70773621 |
| chr13 | 70784278 | 70784428 |
| chr13 | 70789164 | 70789319 |
| chr13 | 70792969 | 70793307 |
| chr13 | 70794027 | 70794643 |
| chr13 | 70819020 | 70819348 |
| chr13 | 70836269 | 70836503 |
| chr13 | 70837622 | 70837999 |
| chr13 | 70837999 | 70838343 |
| chr13 | 70840261 | 70840487 |
| chr13 | 70853608 | 70853826 |
| chr13 | 70854219 | 70854370 |
| chr13 | 70862458 | 70862840 |
| chr13 | 70863410 | 70863579 |
| chr13 | 70867022 | 70867371 |
| chr13 | 70874540 | 70874693 |
| chr13 | 70874711 | 70875188 |
| chr13 | 70886791 | 70887023 |
| chr13 | 70887158 | 70887542 |
| chr13 | 70888301 | 70888464 |
| chr13 | 70902729 | 70903193 |
| chr13 | 70916306 | 70916456 |
| chr13 | 71001403 | 71001653 |
| chr13 | 71006206 | 71006441 |
| chr13 | 71018378 | 71018520 |

|       |          |          |
|-------|----------|----------|
| chr13 | 71018520 | 71018686 |
| chr13 | 71018686 | 71019048 |
| chr13 | 71019065 | 71019349 |
| chr13 | 71019349 | 71019627 |
| chr13 | 71019627 | 71019856 |
| chr13 | 71019881 | 71020159 |
| chr13 | 71020159 | 71020477 |
| chr13 | 71105303 | 71105519 |
| chr13 | 71106399 | 71106630 |
| chr13 | 71107922 | 71108193 |
| chr13 | 71108193 | 71108563 |
| chr13 | 71111463 | 71111875 |
| chr13 | 71150000 | 71150468 |
| chr13 | 71247360 | 71247650 |
| chr13 | 71248754 | 71248924 |
| chr13 | 71270368 | 71270596 |
| chr13 | 71272305 | 71272518 |
| chr13 | 71272518 | 71273076 |
| chr13 | 71273433 | 71273961 |
| chr13 | 71314914 | 71315098 |
| chr13 | 71437452 | 71437810 |
| chr13 | 71437810 | 71438117 |
| chr13 | 71447467 | 71447692 |
| chr13 | 71458456 | 71458724 |
| chr13 | 71519823 | 71520070 |
| chr13 | 71529806 | 71529999 |
| chr13 | 71587647 | 71587863 |
| chr13 | 71649055 | 71649208 |
| chr13 | 71653556 | 71653713 |
| chr13 | 71658007 | 71658201 |
| chr13 | 71659150 | 71659339 |
| chr13 | 71688672 | 71688892 |
| chr13 | 71845617 | 71845917 |
| chr13 | 71845977 | 71846132 |
| chr13 | 71863182 | 71863428 |
| chr13 | 71910395 | 71910738 |
| chr13 | 71935912 | 71936062 |
| chr13 | 71945114 | 71945500 |
| chr13 | 71945500 | 71945792 |
| chr13 | 71945792 | 71946084 |
| chr13 | 71946084 | 71946367 |
| chr13 | 71946367 | 71946626 |

|       |          |          |
|-------|----------|----------|
| chr13 | 71956495 | 71956819 |
| chr13 | 71956819 | 71957162 |
| chr13 | 71957266 | 71957417 |
| chr13 | 71958636 | 71958830 |
| chr13 | 71959270 | 71959843 |
| chr13 | 71962745 | 71962914 |
| chr13 | 71963125 | 71963544 |
| chr13 | 71963544 | 71964010 |
| chr13 | 71964051 | 71964223 |
| chr13 | 71964439 | 71964698 |
| chr13 | 71986825 | 71987136 |
| chr13 | 72006157 | 72006390 |
| chr13 | 72007633 | 72007947 |
| chr13 | 72045165 | 72045393 |
| chr13 | 72071110 | 72071428 |
| chr13 | 72073853 | 72074151 |
| chr13 | 72074263 | 72074487 |
| chr13 | 72074487 | 72074780 |
| chr13 | 72076391 | 72076817 |
| chr13 | 72076820 | 72077157 |
| chr13 | 72077322 | 72077771 |
| chr13 | 72093190 | 72093340 |
| chr13 | 72097343 | 72097552 |
| chr13 | 72100466 | 72100753 |
| chr13 | 72100753 | 72101099 |
| chr13 | 72106151 | 72106577 |
| chr13 | 72131714 | 72131876 |
| chr13 | 72141673 | 72141864 |
| chr13 | 72166327 | 72166516 |
| chr13 | 72167456 | 72167742 |
| chr13 | 72197850 | 72198114 |
| chr13 | 72198114 | 72198324 |
| chr13 | 72198359 | 72198686 |
| chr13 | 72198686 | 72199220 |
| chr13 | 72208157 | 72208391 |
| chr13 | 72208391 | 72208633 |
| chr13 | 72208633 | 72208914 |
| chr13 | 72209892 | 72210267 |
| chr13 | 72230827 | 72231001 |
| chr13 | 72231400 | 72231596 |
| chr13 | 72231596 | 72231956 |
| chr13 | 72231956 | 72232482 |

|       |          |          |
|-------|----------|----------|
| chr13 | 72263887 | 72264297 |
| chr13 | 72264297 | 72264949 |
| chr13 | 72272415 | 72272717 |
| chr13 | 72280155 | 72280823 |
| chr13 | 72280851 | 72281312 |
| chr13 | 72282767 | 72283137 |
| chr13 | 72287215 | 72287568 |
| chr13 | 72299792 | 72300057 |
| chr13 | 72301933 | 72302212 |
| chr13 | 72349382 | 72349564 |
| chr13 | 72352188 | 72352342 |
| chr13 | 72352618 | 72352918 |
| chr13 | 72352918 | 72353277 |
| chr13 | 72370275 | 72370536 |
| chr13 | 72378798 | 72379033 |
| chr13 | 72419500 | 72419727 |
| chr13 | 72419727 | 72419947 |
| chr13 | 72429205 | 72429419 |
| chr13 | 72437799 | 72438091 |
| chr13 | 72455978 | 72456574 |
| chr13 | 72485280 | 72485700 |
| chr13 | 72505861 | 72506288 |
| chr13 | 72508438 | 72508634 |
| chr13 | 72530518 | 72530715 |
| chr13 | 72541862 | 72542089 |
| chr13 | 72544398 | 72544660 |
| chr13 | 72546864 | 72547032 |
| chr13 | 72547304 | 72547454 |
| chr13 | 72551964 | 72552247 |
| chr13 | 72552325 | 72552924 |
| chr13 | 72561931 | 72562269 |
| chr13 | 72562269 | 72562592 |
| chr13 | 72594771 | 72594976 |
| chr13 | 72620445 | 72620655 |
| chr13 | 72624043 | 72624202 |
| chr13 | 72625282 | 72625504 |
| chr13 | 72627425 | 72627728 |
| chr13 | 72628019 | 72628418 |
| chr13 | 72628418 | 72629160 |
| chr13 | 72638415 | 72638660 |
| chr13 | 72638719 | 72639007 |
| chr13 | 72639214 | 72639455 |

|       |          |          |
|-------|----------|----------|
| chr13 | 72639455 | 72639671 |
| chr13 | 72639671 | 72639909 |
| chr13 | 72639909 | 72640172 |
| chr13 | 72640172 | 72640462 |
| chr13 | 72656443 | 72656808 |
| chr13 | 72687927 | 72688094 |
| chr13 | 72708784 | 72709101 |
| chr13 | 72709997 | 72710464 |
| chr13 | 72714815 | 72715081 |
| chr13 | 72723103 | 72723287 |
| chr13 | 72735913 | 72736116 |
| chr13 | 72749224 | 72749381 |
| chr13 | 72756382 | 72756599 |
| chr13 | 72783367 | 72783517 |
| chr13 | 72825162 | 72825494 |
| chr13 | 72834906 | 72835082 |
| chr13 | 72835579 | 72835850 |
| chr13 | 72848234 | 72848395 |
| chr13 | 72978163 | 72978380 |
| chr13 | 72979044 | 72979532 |
| chr13 | 73020280 | 73020839 |
| chr13 | 73031311 | 73031550 |
| chr13 | 73033128 | 73033541 |
| chr13 | 73033541 | 73034085 |
| chr13 | 73034085 | 73034590 |
| chr13 | 73044264 | 73044497 |
| chr13 | 73071846 | 73072137 |
| chr13 | 73077156 | 73077853 |
| chr13 | 73077895 | 73078215 |
| chr13 | 73087901 | 73088183 |
| chr13 | 73090560 | 73090729 |
| chr13 | 73109858 | 73110116 |
| chr13 | 73122797 | 73123347 |
| chr13 | 73137560 | 73137803 |
| chr13 | 73160177 | 73160770 |
| chr13 | 73251284 | 73251539 |
| chr13 | 73254534 | 73254763 |
| chr13 | 73264437 | 73264619 |
| chr13 | 73265487 | 73265663 |
| chr13 | 73265663 | 73265831 |
| chr13 | 73268367 | 73268670 |
| chr13 | 73268720 | 73269080 |

|       |          |          |
|-------|----------|----------|
| chr13 | 73271851 | 73272022 |
| chr13 | 73284977 | 73285334 |
| chr13 | 73290058 | 73290676 |
| chr13 | 73290676 | 73291010 |
| chr13 | 73303037 | 73303216 |
| chr13 | 73310269 | 73310586 |
| chr13 | 73310589 | 73310941 |
| chr13 | 73311081 | 73311233 |
| chr13 | 73327925 | 73328113 |
| chr13 | 73328158 | 73328409 |
| chr13 | 73328409 | 73328716 |
| chr13 | 73330849 | 73331121 |
| chr13 | 73331121 | 73331636 |
| chr13 | 73339215 | 73339665 |
| chr13 | 73345219 | 73345417 |
| chr13 | 73345541 | 73345815 |
| chr13 | 73346192 | 73346464 |
| chr13 | 73346775 | 73347093 |
| chr13 | 73347162 | 73347470 |
| chr13 | 73355091 | 73355368 |
| chr13 | 73355368 | 73355711 |
| chr13 | 73364973 | 73365159 |
| chr13 | 73365289 | 73365531 |
| chr13 | 73368588 | 73368794 |
| chr13 | 73373933 | 73374826 |
| chr13 | 73383674 | 73383894 |
| chr13 | 73384769 | 73385096 |
| chr13 | 73386178 | 73386376 |
| chr13 | 73396642 | 73396824 |
| chr13 | 73402535 | 73402693 |
| chr13 | 73405764 | 73406080 |
| chr13 | 73417910 | 73418119 |
| chr13 | 73420967 | 73421265 |
| chr13 | 73423165 | 73423378 |
| chr13 | 73425898 | 73426085 |
| chr13 | 73429560 | 73429932 |
| chr13 | 73429932 | 73430234 |
| chr13 | 73431040 | 73431624 |
| chr13 | 73431624 | 73431958 |
| chr13 | 73432547 | 73432821 |
| chr13 | 73432821 | 73433128 |
| chr13 | 73433443 | 73433612 |

|       |          |          |
|-------|----------|----------|
| chr13 | 73441675 | 73441965 |
| chr13 | 73442381 | 73442647 |
| chr13 | 73445133 | 73445423 |
| chr13 | 73447127 | 73447277 |
| chr13 | 73453606 | 73453760 |
| chr13 | 73453880 | 73454178 |
| chr13 | 73454178 | 73454596 |
| chr13 | 73454750 | 73454993 |
| chr13 | 73455828 | 73456195 |
| chr13 | 73456195 | 73456501 |
| chr13 | 73457871 | 73458241 |
| chr13 | 73459515 | 73459734 |
| chr13 | 73466994 | 73467384 |
| chr13 | 73467384 | 73467789 |
| chr13 | 73467789 | 73468168 |
| chr13 | 73469923 | 73470077 |
| chr13 | 73472607 | 73472795 |
| chr13 | 73476237 | 73476502 |
| chr13 | 73480002 | 73480274 |
| chr13 | 73480274 | 73480611 |
| chr13 | 73486067 | 73486522 |
| chr13 | 73489902 | 73490060 |
| chr13 | 73495599 | 73495859 |
| chr13 | 73499980 | 73500305 |
| chr13 | 73500305 | 73500672 |
| chr13 | 73500947 | 73501158 |
| chr13 | 73505481 | 73505729 |
| chr13 | 73505761 | 73506062 |
| chr13 | 73512506 | 73512656 |
| chr13 | 73513053 | 73513262 |
| chr13 | 73513292 | 73513741 |
| chr13 | 73516993 | 73517177 |
| chr13 | 73519112 | 73519352 |
| chr13 | 73520616 | 73521050 |
| chr13 | 73536050 | 73536434 |
| chr13 | 73536434 | 73537102 |
| chr13 | 73538983 | 73539339 |
| chr13 | 73575053 | 73575314 |
| chr13 | 73575314 | 73575580 |
| chr13 | 73577435 | 73577607 |
| chr13 | 73580344 | 73580504 |
| chr13 | 73603687 | 73604155 |



|       |          |          |
|-------|----------|----------|
| chr13 | 73604155 | 73604531 |
| chr13 | 73604531 | 73604906 |
| chr13 | 73620726 | 73620946 |
| chr13 | 73626470 | 73626957 |
| chr13 | 73626957 | 73627275 |
| chr13 | 73627275 | 73627555 |
| chr13 | 73631929 | 73632088 |
| chr13 | 73646485 | 73646704 |
| chr13 | 73646714 | 73647124 |
| chr13 | 73659041 | 73659281 |
| chr13 | 73667596 | 73667746 |
| chr13 | 73667815 | 73668024 |
| chr13 | 73672565 | 73672764 |
| chr13 | 73680305 | 73681003 |
| chr13 | 73682633 | 73682837 |
| chr13 | 73683733 | 73683930 |
| chr13 | 73692330 | 73692887 |
| chr13 | 73695402 | 73695625 |
| chr13 | 73696960 | 73697293 |
| chr13 | 73699772 | 73700059 |
| chr13 | 73714033 | 73714415 |
| chr13 | 73718305 | 73718614 |
| chr13 | 73722980 | 73723346 |
| chr13 | 73723349 | 73723691 |
| chr13 | 73724019 | 73724207 |
| chr13 | 73726714 | 73726949 |
| chr13 | 73732173 | 73732360 |
| chr13 | 73732994 | 73733150 |
| chr13 | 73737330 | 73737538 |
| chr13 | 73742950 | 73743210 |
| chr13 | 73743898 | 73744185 |
| chr13 | 73748675 | 73749211 |
| chr13 | 73750604 | 73750766 |
| chr13 | 73754949 | 73755435 |
| chr13 | 73755515 | 73755665 |
| chr13 | 73763284 | 73763637 |
| chr13 | 73763637 | 73763829 |
| chr13 | 73763829 | 73764072 |
| chr13 | 73764072 | 73764422 |
| chr13 | 73769315 | 73769527 |
| chr13 | 73779511 | 73779661 |
| chr13 | 73803409 | 73803760 |

|       |          |          |
|-------|----------|----------|
| chr13 | 73803760 | 73804341 |
| chr13 | 73808561 | 73808811 |
| chr13 | 73814856 | 73815057 |
| chr13 | 73822257 | 73822528 |
| chr13 | 73822528 | 73822727 |
| chr13 | 73822727 | 73822904 |
| chr13 | 73831221 | 73831400 |
| chr13 | 73831400 | 73831583 |
| chr13 | 73831604 | 73831846 |
| chr13 | 73846921 | 73847441 |
| chr13 | 73847441 | 73847839 |
| chr13 | 73860461 | 73860705 |
| chr13 | 73879911 | 73880141 |
| chr13 | 73886253 | 73886403 |
| chr13 | 73887589 | 73888048 |
| chr13 | 73888048 | 73888343 |
| chr13 | 73888343 | 73888676 |
| chr13 | 73888966 | 73889242 |
| chr13 | 73907742 | 73908028 |
| chr13 | 73910552 | 73910732 |
| chr13 | 73918417 | 73918701 |
| chr13 | 73937051 | 73937321 |
| chr13 | 73937321 | 73937624 |
| chr13 | 73937624 | 73937901 |
| chr13 | 73937901 | 73938201 |
| chr13 | 73943671 | 73943909 |
| chr13 | 73961281 | 73961471 |
| chr13 | 73962369 | 73962526 |
| chr13 | 73965899 | 73966062 |
| chr13 | 73970556 | 73970957 |
| chr13 | 73970957 | 73971633 |
| chr13 | 73981553 | 73981831 |
| chr13 | 73990378 | 73990610 |
| chr13 | 74008956 | 74009768 |
| chr13 | 74009774 | 74009931 |
| chr13 | 74025049 | 74025301 |
| chr13 | 74025301 | 74025591 |
| chr13 | 74025591 | 74026136 |
| chr13 | 74026205 | 74026599 |
| chr13 | 74031259 | 74031473 |
| chr13 | 74061915 | 74062225 |
| chr13 | 74062225 | 74062641 |

|       |          |          |
|-------|----------|----------|
| chr13 | 74096827 | 74097085 |
| chr13 | 74098329 | 74098631 |
| chr13 | 74117272 | 74117446 |
| chr13 | 74119199 | 74119349 |
| chr13 | 74121179 | 74121630 |
| chr13 | 74125322 | 74125588 |
| chr13 | 74126862 | 74127173 |
| chr13 | 74157524 | 74157807 |
| chr13 | 74159263 | 74159514 |
| chr13 | 74166774 | 74167119 |
| chr13 | 74167268 | 74167455 |
| chr13 | 74167515 | 74167859 |
| chr13 | 74169930 | 74170214 |
| chr13 | 74192668 | 74192940 |
| chr13 | 74208345 | 74208815 |
| chr13 | 74208815 | 74209058 |
| chr13 | 74209058 | 74209212 |
| chr13 | 74245566 | 74245899 |
| chr13 | 74245955 | 74246105 |
| chr13 | 74259789 | 74260157 |
| chr13 | 74260291 | 74260459 |
| chr13 | 74265431 | 74265705 |
| chr13 | 74270543 | 74270696 |
| chr13 | 74292271 | 74292443 |
| chr13 | 74296332 | 74296801 |
| chr13 | 74301241 | 74301577 |
| chr13 | 74301577 | 74301999 |
| chr13 | 74301999 | 74302366 |
| chr13 | 74316450 | 74316736 |
| chr13 | 74316785 | 74317522 |
| chr13 | 74317522 | 74317787 |
| chr13 | 74324932 | 74325124 |
| chr13 | 74341084 | 74341449 |
| chr13 | 74349616 | 74349857 |
| chr13 | 74349857 | 74350172 |
| chr13 | 74350172 | 74350472 |
| chr13 | 74350472 | 74350824 |
| chr13 | 74363343 | 74363933 |
| chr13 | 74363933 | 74364244 |
| chr13 | 74390286 | 74390640 |
| chr13 | 74390640 | 74390966 |
| chr13 | 74399328 | 74399706 |

|       |          |          |
|-------|----------|----------|
| chr13 | 74406361 | 74406564 |
| chr13 | 74406564 | 74406857 |
| chr13 | 74457168 | 74457354 |
| chr13 | 74462399 | 74462642 |
| chr13 | 74462642 | 74463045 |
| chr13 | 74463045 | 74463436 |
| chr13 | 74493673 | 74494134 |
| chr13 | 74494134 | 74494674 |
| chr13 | 74522428 | 74522748 |
| chr13 | 74522831 | 74523017 |
| chr13 | 74528407 | 74528614 |
| chr13 | 74528614 | 74528854 |
| chr13 | 74528854 | 74529135 |
| chr13 | 74529155 | 74529476 |
| chr13 | 74529482 | 74529809 |
| chr13 | 74529842 | 74530212 |
| chr13 | 74530315 | 74530690 |
| chr13 | 74563580 | 74564073 |
| chr13 | 74564073 | 74564354 |
| chr13 | 74564354 | 74564596 |
| chr13 | 74591585 | 74591899 |
| chr13 | 74617039 | 74617547 |
| chr13 | 74617547 | 74617825 |
| chr13 | 74617825 | 74618072 |
| chr13 | 74632403 | 74632644 |
| chr13 | 74639023 | 74639357 |
| chr13 | 74639444 | 74639702 |
| chr13 | 74639702 | 74640008 |
| chr13 | 74640008 | 74640534 |
| chr13 | 74736095 | 74736266 |
| chr13 | 74762061 | 74762226 |
| chr13 | 74762788 | 74763159 |
| chr13 | 74764900 | 74765166 |
| chr13 | 74767651 | 74767881 |
| chr13 | 74769921 | 74770225 |
| chr13 | 74770396 | 74770749 |
| chr13 | 74770749 | 74771032 |
| chr13 | 74771318 | 74771577 |
| chr13 | 74772147 | 74772480 |
| chr13 | 74773035 | 74773198 |
| chr13 | 74807524 | 74807719 |
| chr13 | 74807740 | 74808194 |

|       |          |          |
|-------|----------|----------|
| chr13 | 74808194 | 74808538 |
| chr13 | 74808538 | 74808763 |
| chr13 | 74808763 | 74808952 |
| chr13 | 74815716 | 74815911 |
| chr13 | 74822068 | 74822508 |
| chr13 | 74825103 | 74825416 |
| chr13 | 74854364 | 74854701 |
| chr13 | 74863600 | 74864175 |
| chr13 | 74865352 | 74865610 |
| chr13 | 74903763 | 74903981 |
| chr13 | 75088682 | 75088832 |
| chr13 | 75215826 | 75215976 |
| chr13 | 75223294 | 75223536 |
| chr13 | 75227680 | 75227937 |
| chr13 | 75231969 | 75232245 |
| chr13 | 75232591 | 75232895 |
| chr13 | 75236523 | 75236678 |
| chr13 | 75270965 | 75271299 |
| chr13 | 75271399 | 75271674 |
| chr13 | 75315907 | 75316174 |
| chr13 | 75337084 | 75337238 |
| chr13 | 75337308 | 75337563 |
| chr13 | 75366776 | 75367075 |
| chr13 | 75367079 | 75367463 |
| chr13 | 75368302 | 75368733 |
| chr13 | 75375990 | 75376168 |
| chr13 | 75377221 | 75377423 |
| chr13 | 75389306 | 75389479 |
| chr13 | 75390191 | 75390592 |
| chr13 | 75412846 | 75413054 |
| chr13 | 75420783 | 75421020 |
| chr13 | 75460437 | 75460768 |
| chr13 | 75501622 | 75501862 |
| chr13 | 75503261 | 75503681 |
| chr13 | 75503681 | 75503979 |
| chr13 | 75514232 | 75514406 |
| chr13 | 75543594 | 75543847 |
| chr13 | 75574499 | 75574750 |
| chr13 | 75579007 | 75579255 |
| chr13 | 75584379 | 75584570 |
| chr13 | 75598277 | 75598572 |
| chr13 | 75605555 | 75605788 |

|       |          |          |
|-------|----------|----------|
| chr13 | 75623243 | 75623603 |
| chr13 | 75627666 | 75627821 |
| chr13 | 75707057 | 75707730 |
| chr13 | 75707730 | 75708115 |
| chr13 | 75708185 | 75708625 |
| chr13 | 75720726 | 75721042 |
| chr13 | 75739017 | 75739355 |
| chr13 | 75740064 | 75740286 |
| chr13 | 75740286 | 75740488 |
| chr13 | 75752142 | 75752317 |
| chr13 | 75752317 | 75752555 |
| chr13 | 75752555 | 75752903 |
| chr13 | 75754389 | 75754740 |
| chr13 | 75760987 | 75761248 |
| chr13 | 75786312 | 75786620 |
| chr13 | 75788967 | 75789547 |
| chr13 | 75789547 | 75790020 |
| chr13 | 75797647 | 75798211 |
| chr13 | 75798345 | 75798688 |
| chr13 | 75798688 | 75799017 |
| chr13 | 75799037 | 75799236 |
| chr13 | 75824666 | 75824967 |
| chr13 | 75824967 | 75825344 |
| chr13 | 75825344 | 75825672 |
| chr13 | 75833507 | 75833751 |
| chr13 | 75839656 | 75839988 |
| chr13 | 75839988 | 75840247 |
| chr13 | 75840247 | 75840487 |
| chr13 | 75841179 | 75841375 |
| chr13 | 75841475 | 75841733 |
| chr13 | 75844081 | 75844322 |
| chr13 | 75852234 | 75852384 |
| chr13 | 75852452 | 75852885 |
| chr13 | 75866807 | 75866980 |
| chr13 | 75875065 | 75875320 |
| chr13 | 75875902 | 75876085 |
| chr13 | 75876310 | 75876559 |
| chr13 | 75877982 | 75878223 |
| chr13 | 75894234 | 75894429 |
| chr13 | 75895675 | 75896000 |
| chr13 | 75901798 | 75901962 |
| chr13 | 75942783 | 75943006 |

|       |          |          |
|-------|----------|----------|
| chr13 | 75943129 | 75943385 |
| chr13 | 75943385 | 75943593 |
| chr13 | 75943593 | 75943791 |
| chr13 | 75943791 | 75944072 |
| chr13 | 75944339 | 75944604 |
| chr13 | 75944731 | 75944881 |
| chr13 | 76017449 | 76017700 |
| chr13 | 76018037 | 76018379 |
| chr13 | 76018379 | 76018881 |
| chr13 | 76037547 | 76037704 |
| chr13 | 76055489 | 76055740 |
| chr13 | 76055740 | 76056126 |
| chr13 | 76056126 | 76056789 |
| chr13 | 76098162 | 76098499 |
| chr13 | 76098499 | 76098865 |
| chr13 | 76098865 | 76099297 |
| chr13 | 76102070 | 76102388 |
| chr13 | 76180171 | 76180416 |
| chr13 | 76284096 | 76284320 |
| chr13 | 76284587 | 76284965 |
| chr13 | 76358751 | 76359130 |
| chr13 | 76383833 | 76384316 |
| chr13 | 76384316 | 76384690 |
| chr13 | 76384690 | 76385083 |
| chr13 | 76385083 | 76385379 |
| chr13 | 76429589 | 76429821 |
| chr13 | 76481728 | 76481898 |
| chr13 | 76515913 | 76516243 |
| chr13 | 76579462 | 76579729 |
| chr13 | 76591219 | 76591557 |
| chr13 | 76591690 | 76592041 |
| chr13 | 76593065 | 76593220 |
| chr13 | 76639777 | 76640032 |
| chr13 | 76939340 | 76939668 |
| chr13 | 77043425 | 77043685 |
| chr13 | 77071187 | 77071480 |
| chr13 | 77081647 | 77081870 |
| chr13 | 77109558 | 77109843 |
| chr13 | 77128377 | 77128570 |
| chr13 | 77134768 | 77134918 |
| chr13 | 77134933 | 77135171 |
| chr13 | 77135171 | 77135392 |

|       |          |          |
|-------|----------|----------|
| chr13 | 77135392 | 77135650 |
| chr13 | 77135650 | 77135949 |
| chr13 | 77438842 | 77439106 |
| chr13 | 77695399 | 77695549 |
| chr13 | 77708474 | 77709161 |
| chr13 | 77748441 | 77748671 |
| chr13 | 77838823 | 77839070 |
| chr13 | 78010263 | 78010427 |
| chr13 | 78032951 | 78033134 |
| chr13 | 78162303 | 78162466 |
| chr13 | 78163001 | 78163424 |
| chr13 | 78163424 | 78163763 |
| chr13 | 78163763 | 78164032 |
| chr13 | 78171346 | 78171496 |
| chr13 | 78186393 | 78186600 |
| chr13 | 78198093 | 78198280 |
| chr13 | 78198280 | 78198565 |
| chr13 | 78199011 | 78199409 |
| chr13 | 78199409 | 78199672 |
| chr13 | 78200457 | 78200743 |
| chr13 | 78201377 | 78201877 |
| chr13 | 78201918 | 78202068 |
| chr13 | 78203187 | 78203448 |
| chr13 | 78203811 | 78204082 |
| chr13 | 78210382 | 78210555 |
| chr13 | 78456700 | 78456885 |
| chr13 | 78466850 | 78467089 |
| chr13 | 78474170 | 78474419 |
| chr13 | 78483188 | 78483577 |
| chr13 | 78483577 | 78483949 |
| chr13 | 78522379 | 78522689 |
| chr13 | 78543354 | 78543591 |
| chr13 | 78548806 | 78548967 |
| chr13 | 78602726 | 78603123 |
| chr13 | 78603123 | 78603310 |
| chr13 | 78679312 | 78679955 |
| chr13 | 78685274 | 78685501 |
| chr13 | 78704191 | 78704410 |
| chr13 | 78704452 | 78704680 |
| chr13 | 78704730 | 78705071 |
| chr13 | 78715388 | 78715868 |
| chr13 | 78809567 | 78810083 |



|       |          |          |
|-------|----------|----------|
| chr13 | 78812090 | 78812342 |
| chr13 | 78875105 | 78875529 |
| chr13 | 78956668 | 78956838 |
| chr13 | 78998687 | 78999221 |
| chr13 | 79020583 | 79020733 |
| chr13 | 79028209 | 79028396 |
| chr13 | 79029977 | 79030302 |
| chr13 | 79243281 | 79243526 |
| chr13 | 79670979 | 79671137 |
| chr13 | 80557276 | 80557479 |
| chr13 | 80747125 | 80747286 |
| chr13 | 80806262 | 80806485 |
| chr13 | 80862334 | 80862512 |
| chr13 | 80864245 | 80864522 |
| chr13 | 80881865 | 80882015 |
| chr13 | 80882970 | 80883169 |
| chr13 | 80883169 | 80883506 |
| chr13 | 80884751 | 80884929 |
| chr13 | 80885378 | 80885835 |
| chr13 | 80885835 | 80886114 |
| chr13 | 80886114 | 80886449 |
| chr13 | 80902842 | 80903082 |
| chr13 | 80915155 | 80915388 |
| chr13 | 80928362 | 80928589 |
| chr13 | 80935210 | 80935545 |
| chr13 | 80936327 | 80936822 |
| chr13 | 80939847 | 80940108 |
| chr13 | 80940500 | 80940796 |
| chr13 | 80940801 | 80941220 |
| chr13 | 80941220 | 80941587 |
| chr13 | 80949105 | 80949323 |
| chr13 | 80951278 | 80951800 |
| chr13 | 80951976 | 80952176 |
| chr13 | 80953349 | 80953509 |
| chr13 | 80957068 | 80957305 |
| chr13 | 80962759 | 80963241 |
| chr13 | 80963241 | 80963622 |
| chr13 | 80971691 | 80972021 |
| chr13 | 80986794 | 80986951 |
| chr13 | 80996724 | 80997136 |
| chr13 | 81047583 | 81047787 |
| chr13 | 81050926 | 81051345 |

|       |          |          |
|-------|----------|----------|
| chr13 | 81051736 | 81052140 |
| chr13 | 81065619 | 81065850 |
| chr13 | 81096244 | 81096753 |
| chr13 | 81096781 | 81096976 |
| chr13 | 81103856 | 81104233 |
| chr13 | 81136622 | 81137016 |
| chr13 | 81151060 | 81151241 |
| chr13 | 81155374 | 81155677 |
| chr13 | 81182012 | 81182250 |
| chr13 | 81182250 | 81182457 |
| chr13 | 81238091 | 81238274 |
| chr13 | 81238904 | 81239216 |
| chr13 | 81312221 | 81312375 |
| chr13 | 81320215 | 81320388 |
| chr13 | 81342762 | 81342914 |
| chr13 | 81343080 | 81343565 |
| chr13 | 81401686 | 81402150 |
| chr13 | 81413796 | 81414062 |
| chr13 | 81424037 | 81424427 |
| chr13 | 81439450 | 81439673 |
| chr13 | 81441485 | 81441753 |
| chr13 | 81473887 | 81474081 |
| chr13 | 81487017 | 81487442 |
| chr13 | 81495612 | 81495877 |
| chr13 | 81526777 | 81527003 |
| chr13 | 81534724 | 81535021 |
| chr13 | 81535021 | 81535565 |
| chr13 | 81602005 | 81602188 |
| chr13 | 81632764 | 81633101 |
| chr13 | 81633101 | 81633485 |
| chr13 | 81639672 | 81639979 |
| chr13 | 81640721 | 81641218 |
| chr13 | 81641218 | 81641542 |
| chr13 | 81641631 | 81641807 |
| chr13 | 81641858 | 81642016 |
| chr13 | 81657221 | 81657542 |
| chr13 | 81657542 | 81658125 |
| chr13 | 81662757 | 81663078 |
| chr13 | 81663121 | 81663397 |
| chr13 | 81664369 | 81664698 |
| chr13 | 81683070 | 81683538 |
| chr13 | 81683993 | 81684152 |

|       |          |          |
|-------|----------|----------|
| chr13 | 81684152 | 81684359 |
| chr13 | 81684359 | 81684704 |
| chr13 | 81684904 | 81685221 |
| chr13 | 81701056 | 81701383 |
| chr13 | 81710719 | 81711215 |
| chr13 | 81711215 | 81711637 |
| chr13 | 81711637 | 81712156 |
| chr13 | 81760446 | 81760697 |
| chr13 | 81761937 | 81762094 |
| chr13 | 81776691 | 81776853 |
| chr13 | 81782921 | 81783427 |
| chr13 | 81783427 | 81783988 |
| chr13 | 81807100 | 81807347 |
| chr13 | 81807611 | 81807811 |
| chr13 | 81852643 | 81852943 |
| chr13 | 81942058 | 81942325 |
| chr13 | 81944157 | 81944312 |
| chr13 | 81966670 | 81966866 |
| chr13 | 81982241 | 81982880 |
| chr13 | 82177713 | 82177863 |
| chr13 | 82361472 | 82361682 |
| chr13 | 82540087 | 82540356 |
| chr13 | 82656735 | 82656935 |
| chr13 | 82678484 | 82678849 |
| chr13 | 82777310 | 82777639 |
| chr13 | 82779604 | 82779802 |
| chr13 | 82781228 | 82781407 |
| chr13 | 82781454 | 82781700 |
| chr13 | 82865861 | 82866027 |
| chr13 | 82887414 | 82887700 |
| chr13 | 82892730 | 82893328 |
| chr13 | 82973685 | 82973913 |
| chr13 | 83042170 | 83042356 |
| chr13 | 83164041 | 83164292 |
| chr13 | 83193522 | 83193799 |
| chr13 | 83200371 | 83200570 |
| chr13 | 83246191 | 83246485 |
| chr13 | 83378681 | 83378898 |
| chr13 | 83593103 | 83593296 |
| chr13 | 83601767 | 83602065 |
| chr13 | 83603756 | 83603916 |
| chr13 | 83603918 | 83604219 |

|       |          |          |
|-------|----------|----------|
| chr13 | 83604393 | 83604628 |
| chr13 | 83608215 | 83608676 |
| chr13 | 83652016 | 83652183 |
| chr13 | 83652276 | 83652491 |
| chr13 | 83652617 | 83652983 |
| chr13 | 83654972 | 83655200 |
| chr13 | 83715042 | 83715296 |
| chr13 | 83715324 | 83715482 |
| chr13 | 83720886 | 83721056 |
| chr13 | 83721114 | 83721301 |
| chr13 | 83725058 | 83725307 |
| chr13 | 83729695 | 83729970 |
| chr13 | 83730421 | 83730683 |
| chr13 | 83730693 | 83730960 |
| chr13 | 83730960 | 83731257 |
| chr13 | 83731257 | 83731590 |
| chr13 | 83744923 | 83745288 |
| chr13 | 84221780 | 84222449 |
| chr13 | 84222449 | 84222813 |
| chr13 | 84251349 | 84251644 |
| chr13 | 84347854 | 84348587 |
| chr13 | 84348624 | 84348934 |
| chr13 | 84371144 | 84371295 |
| chr13 | 84569440 | 84569595 |
| chr13 | 84612976 | 84613331 |
| chr13 | 84621489 | 84621749 |
| chr13 | 84633024 | 84633375 |
| chr13 | 84634015 | 84634200 |
| chr13 | 84646938 | 84647350 |
| chr13 | 84703152 | 84703302 |
| chr13 | 84758613 | 84758868 |
| chr13 | 84791175 | 84791364 |
| chr13 | 85126660 | 85127031 |
| chr13 | 85127031 | 85127258 |
| chr13 | 85127258 | 85127454 |
| chr13 | 85169320 | 85169593 |
| chr13 | 85188991 | 85189226 |
| chr13 | 85189226 | 85189588 |
| chr13 | 85189588 | 85190109 |
| chr13 | 85279587 | 85279822 |
| chr13 | 85282207 | 85282413 |
| chr13 | 85288345 | 85288765 |

|       |          |          |
|-------|----------|----------|
| chr13 | 85288765 | 85289138 |
| chr13 | 85289138 | 85289492 |
| chr13 | 85289492 | 85289799 |
| chr13 | 85306360 | 85306649 |
| chr13 | 85333189 | 85333339 |
| chr13 | 85333444 | 85333606 |
| chr13 | 85337014 | 85337202 |
| chr13 | 85337216 | 85337505 |
| chr13 | 85359164 | 85359544 |
| chr13 | 85359665 | 85359889 |
| chr13 | 85376598 | 85376948 |
| chr13 | 85390251 | 85390414 |
| chr13 | 85390439 | 85390870 |
| chr13 | 85398752 | 85399157 |
| chr13 | 85399157 | 85399433 |
| chr13 | 85415063 | 85415282 |
| chr13 | 85418703 | 85419086 |
| chr13 | 85419119 | 85419509 |
| chr13 | 85419509 | 85419950 |
| chr13 | 85425193 | 85425759 |
| chr13 | 85430026 | 85430415 |
| chr13 | 85430826 | 85431313 |
| chr13 | 85431398 | 85431625 |
| chr13 | 85438526 | 85438920 |
| chr13 | 85458695 | 85458898 |
| chr13 | 85471172 | 85471547 |
| chr13 | 85473170 | 85473559 |
| chr13 | 85480896 | 85481208 |
| chr13 | 85481208 | 85481756 |
| chr13 | 85509660 | 85509843 |
| chr13 | 85545012 | 85545164 |
| chr13 | 85556227 | 85556377 |
| chr13 | 85692348 | 85692543 |
| chr13 | 85766805 | 85767026 |
| chr13 | 85791285 | 85791527 |
| chr13 | 85791589 | 85791777 |
| chr13 | 85791777 | 85792056 |
| chr13 | 85894749 | 85894985 |
| chr13 | 85921183 | 85921478 |
| chr13 | 85955435 | 85955744 |
| chr13 | 86046198 | 86046677 |
| chr13 | 86046677 | 86047034 |

|       |          |          |
|-------|----------|----------|
| chr13 | 86148163 | 86148420 |
| chr13 | 86728589 | 86728883 |
| chr13 | 87101696 | 87101931 |
| chr13 | 87352892 | 87353070 |
| chr13 | 87375003 | 87375163 |
| chr13 | 87631985 | 87632474 |
| chr13 | 87928694 | 87928982 |
| chr13 | 87929478 | 87929865 |
| chr13 | 88017515 | 88017685 |
| chr13 | 88201750 | 88202307 |
| chr13 | 88212430 | 88212660 |
| chr13 | 88400403 | 88400592 |
| chr13 | 88799029 | 88799552 |
| chr13 | 88801052 | 88801347 |
| chr13 | 88805762 | 88806200 |
| chr13 | 88806422 | 88806592 |
| chr13 | 88810111 | 88810508 |
| chr13 | 88816573 | 88816758 |
| chr13 | 88816758 | 88817135 |
| chr13 | 88821365 | 88821621 |
| chr13 | 88821621 | 88821945 |
| chr13 | 88821945 | 88822239 |
| chr13 | 88823693 | 88823863 |
| chr13 | 88938615 | 88938895 |
| chr13 | 88998243 | 88998505 |
| chr13 | 89029752 | 89030087 |
| chr13 | 89065084 | 89065323 |
| chr13 | 89068281 | 89068481 |
| chr13 | 89189479 | 89189748 |
| chr13 | 89324408 | 89324609 |
| chr13 | 89383859 | 89384031 |
| chr13 | 89384850 | 89385021 |
| chr13 | 89395330 | 89395525 |
| chr13 | 89439248 | 89439469 |
| chr13 | 89443675 | 89443911 |
| chr13 | 89444611 | 89445350 |
| chr13 | 89453677 | 89454134 |
| chr13 | 89454751 | 89454975 |
| chr13 | 89477897 | 89478096 |
| chr13 | 89485918 | 89486102 |
| chr13 | 89539169 | 89539460 |
| chr13 | 89539472 | 89539686 |

|       |          |          |
|-------|----------|----------|
| chr13 | 89543109 | 89543318 |
| chr13 | 89599459 | 89599651 |
| chr13 | 89634214 | 89634411 |
| chr13 | 89636955 | 89637427 |
| chr13 | 89653305 | 89653583 |
| chr13 | 89668093 | 89668322 |
| chr13 | 89709911 | 89710224 |
| chr13 | 89720609 | 89720780 |
| chr13 | 89739287 | 89739751 |
| chr13 | 89739810 | 89739978 |
| chr13 | 89740010 | 89740213 |
| chr13 | 89740247 | 89740685 |
| chr13 | 89740685 | 89741082 |
| chr13 | 89779330 | 89779491 |
| chr13 | 89828396 | 89828868 |
| chr13 | 89889061 | 89889480 |
| chr13 | 89899153 | 89899354 |
| chr13 | 89933076 | 89933415 |
| chr13 | 90005670 | 90005837 |
| chr13 | 90009879 | 90010099 |
| chr13 | 90089008 | 90089411 |
| chr13 | 90089411 | 90089815 |
| chr13 | 90089815 | 90090114 |
| chr13 | 90117266 | 90117463 |
| chr13 | 90129536 | 90129728 |
| chr13 | 90144486 | 90144906 |
| chr13 | 90144973 | 90145170 |
| chr13 | 90150159 | 90150335 |
| chr13 | 90151917 | 90152208 |
| chr13 | 90152264 | 90152466 |
| chr13 | 90167274 | 90167425 |
| chr13 | 90171392 | 90171900 |
| chr13 | 90216855 | 90217106 |
| chr13 | 90217106 | 90217479 |
| chr13 | 90230591 | 90230876 |
| chr13 | 90230876 | 90231156 |
| chr13 | 90233843 | 90234594 |
| chr13 | 90337422 | 90337645 |
| chr13 | 90337645 | 90337941 |
| chr13 | 90337948 | 90338184 |
| chr13 | 90338923 | 90339199 |
| chr13 | 90394961 | 90395205 |

|       |          |          |
|-------|----------|----------|
| chr13 | 90397756 | 90398084 |
| chr13 | 90473056 | 90473383 |
| chr13 | 90473458 | 90473769 |
| chr13 | 90502273 | 90502437 |
| chr13 | 90513829 | 90514320 |
| chr13 | 90515833 | 90516376 |
| chr13 | 90519103 | 90519268 |
| chr13 | 90521124 | 90521305 |
| chr13 | 90559570 | 90559775 |
| chr13 | 90560094 | 90560424 |
| chr13 | 90572652 | 90572910 |
| chr13 | 90575173 | 90575831 |
| chr13 | 90599453 | 90599610 |
| chr13 | 90685133 | 90685401 |
| chr13 | 90770962 | 90771170 |
| chr13 | 90782103 | 90782310 |
| chr13 | 90796806 | 90797168 |
| chr13 | 90797215 | 90797713 |
| chr13 | 90799168 | 90799565 |
| chr13 | 90826576 | 90826869 |
| chr13 | 90841009 | 90841257 |
| chr13 | 90871628 | 90871919 |
| chr13 | 90875007 | 90875306 |
| chr13 | 90885937 | 90886097 |
| chr13 | 90886245 | 90886402 |
| chr13 | 90886570 | 90886742 |
| chr13 | 90886798 | 90887015 |
| chr13 | 90922693 | 90922999 |
| chr13 | 90922999 | 90923381 |
| chr13 | 90923381 | 90923717 |
| chr13 | 90929293 | 90929481 |
| chr13 | 90929481 | 90929669 |
| chr13 | 90929907 | 90930154 |
| chr13 | 90935906 | 90936113 |
| chr13 | 90941105 | 90941757 |
| chr13 | 90967506 | 90967798 |
| chr13 | 90977095 | 90977494 |
| chr13 | 90992977 | 90993311 |
| chr13 | 91038066 | 91038379 |
| chr13 | 91038747 | 91038976 |
| chr13 | 91039247 | 91039496 |
| chr13 | 91040534 | 91040736 |



|       |          |          |
|-------|----------|----------|
| chr13 | 91041349 | 91041585 |
| chr13 | 91091360 | 91091792 |
| chr13 | 91091951 | 91092122 |
| chr13 | 91115026 | 91115213 |
| chr13 | 91137830 | 91138023 |
| chr13 | 91164899 | 91165721 |
| chr13 | 91173425 | 91173586 |
| chr13 | 91173685 | 91173859 |
| chr13 | 91174711 | 91175204 |
| chr13 | 91186661 | 91186909 |
| chr13 | 91189768 | 91189983 |
| chr13 | 91202948 | 91203162 |
| chr13 | 91206197 | 91206754 |
| chr13 | 91215323 | 91215495 |
| chr13 | 91223626 | 91224389 |
| chr13 | 91224594 | 91224753 |
| chr13 | 91243753 | 91244042 |
| chr13 | 91246788 | 91247062 |
| chr13 | 91267458 | 91267674 |
| chr13 | 91306053 | 91306341 |
| chr13 | 91306552 | 91306927 |
| chr13 | 91311295 | 91311678 |
| chr13 | 91313304 | 91313481 |
| chr13 | 91365076 | 91365669 |
| chr13 | 91366594 | 91366919 |
| chr13 | 91370868 | 91371231 |
| chr13 | 91371231 | 91371523 |
| chr13 | 91372043 | 91372213 |
| chr13 | 91372213 | 91372434 |
| chr13 | 91448978 | 91449151 |
| chr13 | 91455524 | 91455683 |
| chr13 | 91455745 | 91455951 |
| chr13 | 91456108 | 91456335 |
| chr13 | 91460368 | 91460625 |
| chr13 | 91460625 | 91460901 |
| chr13 | 91460901 | 91461388 |
| chr13 | 91546413 | 91546638 |
| chr13 | 91601925 | 91602168 |
| chr13 | 91636902 | 91637141 |
| chr13 | 91648399 | 91648584 |
| chr13 | 91680293 | 91680602 |
| chr13 | 91681142 | 91681409 |

|       |          |          |
|-------|----------|----------|
| chr13 | 91687716 | 91687968 |
| chr13 | 91697126 | 91697290 |
| chr13 | 91702420 | 91702585 |
| chr13 | 91723191 | 91723431 |
| chr13 | 91724006 | 91724281 |
| chr13 | 91724281 | 91724551 |
| chr13 | 91741278 | 91741494 |
| chr13 | 91741494 | 91741713 |
| chr13 | 91741713 | 91741954 |
| chr13 | 91756222 | 91756541 |
| chr13 | 91779615 | 91779914 |
| chr13 | 91779914 | 91780279 |
| chr13 | 91786165 | 91786431 |
| chr13 | 91801431 | 91801589 |
| chr13 | 91801818 | 91802079 |
| chr13 | 91807123 | 91807494 |
| chr13 | 91807494 | 91807990 |
| chr13 | 91808134 | 91808327 |
| chr13 | 91888598 | 91888822 |
| chr13 | 91893195 | 91893432 |
| chr13 | 91904232 | 91904471 |
| chr13 | 91904640 | 91904866 |
| chr13 | 91908290 | 91908561 |
| chr13 | 91911241 | 91911565 |
| chr13 | 91911709 | 91911911 |
| chr13 | 91915965 | 91916263 |
| chr13 | 91916408 | 91916921 |
| chr13 | 91929994 | 91930243 |
| chr13 | 91930253 | 91930598 |
| chr13 | 91935949 | 91936387 |
| chr13 | 91937298 | 91937555 |
| chr13 | 91940228 | 91940468 |
| chr13 | 91940544 | 91940794 |
| chr13 | 92067840 | 92068208 |
| chr13 | 92069705 | 92069930 |
| chr13 | 92072155 | 92072341 |
| chr13 | 92073014 | 92073549 |
| chr13 | 92095138 | 92095389 |
| chr13 | 92095389 | 92095655 |
| chr13 | 92122616 | 92122850 |
| chr13 | 92126116 | 92126270 |
| chr13 | 92131010 | 92131476 |

|       |          |          |
|-------|----------|----------|
| chr13 | 92131476 | 92132130 |
| chr13 | 92150780 | 92151104 |
| chr13 | 92151306 | 92151507 |
| chr13 | 92151507 | 92151745 |
| chr13 | 92198073 | 92198417 |
| chr13 | 92202455 | 92202678 |
| chr13 | 92213886 | 92214165 |
| chr13 | 92214300 | 92214737 |
| chr13 | 92228029 | 92228331 |
| chr13 | 92228356 | 92228726 |
| chr13 | 92229345 | 92229623 |
| chr13 | 92236106 | 92236348 |
| chr13 | 92241353 | 92241776 |
| chr13 | 92241776 | 92242011 |
| chr13 | 92259115 | 92259352 |
| chr13 | 92274349 | 92274889 |
| chr13 | 92315915 | 92316119 |
| chr13 | 92316123 | 92316324 |
| chr13 | 92316937 | 92317097 |
| chr13 | 92336805 | 92337050 |
| chr13 | 92337050 | 92337294 |
| chr13 | 92353925 | 92354112 |
| chr13 | 92354459 | 92354866 |
| chr13 | 92354866 | 92355265 |
| chr13 | 92355265 | 92355633 |
| chr13 | 92369543 | 92369698 |
| chr13 | 92402104 | 92402387 |
| chr13 | 92406823 | 92407095 |
| chr13 | 92425675 | 92426289 |
| chr13 | 92426289 | 92426740 |
| chr13 | 92426740 | 92426989 |
| chr13 | 92483358 | 92483617 |
| chr13 | 92483786 | 92484361 |
| chr13 | 92506625 | 92506823 |
| chr13 | 92530371 | 92530679 |
| chr13 | 92530679 | 92530861 |
| chr13 | 92530861 | 92531258 |
| chr13 | 92532343 | 92532658 |
| chr13 | 92537167 | 92537465 |
| chr13 | 92554925 | 92555175 |
| chr13 | 92580302 | 92580688 |
| chr13 | 92610565 | 92610894 |

|       |          |          |
|-------|----------|----------|
| chr13 | 92610894 | 92611154 |
| chr13 | 92611154 | 92611377 |
| chr13 | 92611377 | 92611758 |
| chr13 | 92613186 | 92613497 |
| chr13 | 92617054 | 92617237 |
| chr13 | 92625104 | 92625279 |
| chr13 | 92629484 | 92630121 |
| chr13 | 92630121 | 92630464 |
| chr13 | 92636878 | 92637276 |
| chr13 | 92642235 | 92642748 |
| chr13 | 92642748 | 92643012 |
| chr13 | 92643012 | 92643213 |
| chr13 | 92656893 | 92657111 |
| chr13 | 92660217 | 92660408 |
| chr13 | 92664460 | 92664685 |
| chr13 | 92664714 | 92665261 |
| chr13 | 92667678 | 92667958 |
| chr13 | 92668167 | 92668503 |
| chr13 | 92675371 | 92675657 |
| chr13 | 92675956 | 92676205 |
| chr13 | 92679487 | 92679642 |
| chr13 | 92679696 | 92680152 |
| chr13 | 92693096 | 92693384 |
| chr13 | 92694269 | 92694535 |
| chr13 | 92722401 | 92722914 |
| chr13 | 92733429 | 92733579 |
| chr13 | 92740424 | 92740602 |
| chr13 | 92740904 | 92741128 |
| chr13 | 92750947 | 92751310 |
| chr13 | 92751363 | 92751528 |
| chr13 | 92751768 | 92752076 |
| chr13 | 92789110 | 92789272 |
| chr13 | 92794618 | 92794837 |
| chr13 | 92797752 | 92798134 |
| chr13 | 92799560 | 92800262 |
| chr13 | 92804410 | 92804635 |
| chr13 | 92844585 | 92844889 |
| chr13 | 92844889 | 92845238 |
| chr13 | 92858670 | 92859075 |
| chr13 | 92901995 | 92902150 |
| chr13 | 92917849 | 92918179 |
| chr13 | 92918386 | 92918641 |

|       |          |          |
|-------|----------|----------|
| chr13 | 92919403 | 92919622 |
| chr13 | 92919735 | 92920204 |
| chr13 | 92963494 | 92963804 |
| chr13 | 92986782 | 92987022 |
| chr13 | 93021013 | 93021336 |
| chr13 | 93061175 | 93061457 |
| chr13 | 93061457 | 93061678 |
| chr13 | 93061678 | 93061882 |
| chr13 | 93062156 | 93062347 |
| chr13 | 93063303 | 93063699 |
| chr13 | 93064566 | 93064866 |
| chr13 | 93115502 | 93115683 |
| chr13 | 93144037 | 93144275 |
| chr13 | 93144275 | 93144575 |
| chr13 | 93144575 | 93144881 |
| chr13 | 93144881 | 93145096 |
| chr13 | 93191815 | 93192090 |
| chr13 | 93192090 | 93192369 |
| chr13 | 93192369 | 93192738 |
| chr13 | 93214738 | 93214965 |
| chr13 | 93243077 | 93243254 |
| chr13 | 93243254 | 93243486 |
| chr13 | 93303298 | 93303588 |
| chr13 | 93303588 | 93303871 |
| chr13 | 93303871 | 93304189 |
| chr13 | 93304189 | 93304524 |
| chr13 | 93304524 | 93304937 |
| chr13 | 93313089 | 93313458 |
| chr13 | 93330801 | 93330983 |
| chr13 | 93351464 | 93351763 |
| chr13 | 93351960 | 93352385 |
| chr13 | 93362935 | 93363292 |
| chr13 | 93418342 | 93418580 |
| chr13 | 93422925 | 93423264 |
| chr13 | 93423280 | 93423443 |
| chr13 | 93440281 | 93440484 |
| chr13 | 93484228 | 93484598 |
| chr13 | 93488542 | 93488823 |
| chr13 | 93492723 | 93492988 |
| chr13 | 93492988 | 93493304 |
| chr13 | 93493323 | 93493562 |
| chr13 | 93493600 | 93493759 |

|       |          |          |
|-------|----------|----------|
| chr13 | 93498243 | 93498442 |
| chr13 | 93498442 | 93498634 |
| chr13 | 93498634 | 93498870 |
| chr13 | 93498870 | 93499272 |
| chr13 | 93499272 | 93499685 |
| chr13 | 93499685 | 93500171 |
| chr13 | 93517332 | 93517489 |
| chr13 | 93526767 | 93527063 |
| chr13 | 93589233 | 93589413 |
| chr13 | 93604820 | 93605155 |
| chr13 | 93605245 | 93605526 |
| chr13 | 93605526 | 93605799 |
| chr13 | 93613026 | 93613246 |
| chr13 | 93723613 | 93723795 |
| chr13 | 93749780 | 93749980 |
| chr13 | 93771515 | 93771906 |
| chr13 | 93771906 | 93772287 |
| chr13 | 93772287 | 93772532 |
| chr13 | 93793398 | 93793625 |
| chr13 | 93841437 | 93841603 |
| chr13 | 93842308 | 93842556 |
| chr13 | 93842840 | 93843101 |
| chr13 | 93843101 | 93843347 |
| chr13 | 93882227 | 93882480 |
| chr13 | 93892109 | 93892500 |
| chr13 | 93898554 | 93898818 |
| chr13 | 93941141 | 93941381 |
| chr13 | 93941381 | 93941686 |
| chr13 | 93944039 | 93944218 |
| chr13 | 93952501 | 93952745 |
| chr13 | 93975616 | 93976044 |
| chr13 | 93984472 | 93984684 |
| chr13 | 93984831 | 93985229 |
| chr13 | 93985229 | 93985595 |
| chr13 | 93985668 | 93985826 |
| chr13 | 93989032 | 93989202 |
| chr13 | 93989277 | 93989515 |
| chr13 | 93992356 | 93992739 |
| chr13 | 93997834 | 93998385 |
| chr13 | 93998385 | 93998707 |
| chr13 | 94024662 | 94024975 |
| chr13 | 94025228 | 94025387 |

|       |          |          |
|-------|----------|----------|
| chr13 | 94050812 | 94051188 |
| chr13 | 94057385 | 94057810 |
| chr13 | 94057810 | 94058018 |
| chr13 | 94058018 | 94058342 |
| chr13 | 94062608 | 94063110 |
| chr13 | 94063297 | 94063456 |
| chr13 | 94090696 | 94091067 |
| chr13 | 94094705 | 94095026 |
| chr13 | 94098386 | 94098889 |
| chr13 | 94109153 | 94109350 |
| chr13 | 94111421 | 94111646 |
| chr13 | 94132420 | 94132673 |
| chr13 | 94132673 | 94133056 |
| chr13 | 94134494 | 94134798 |
| chr13 | 94134798 | 94135022 |
| chr13 | 94136511 | 94136748 |
| chr13 | 94140132 | 94140382 |
| chr13 | 94140982 | 94141186 |
| chr13 | 94152457 | 94152743 |
| chr13 | 94152883 | 94153245 |
| chr13 | 94153641 | 94153836 |
| chr13 | 94154502 | 94154850 |
| chr13 | 94154859 | 94155049 |
| chr13 | 94155049 | 94155221 |
| chr13 | 94165492 | 94165744 |
| chr13 | 94172706 | 94172861 |
| chr13 | 94173695 | 94173911 |
| chr13 | 94173911 | 94174154 |
| chr13 | 94174154 | 94174337 |
| chr13 | 94174337 | 94174520 |
| chr13 | 94184614 | 94185026 |
| chr13 | 94185026 | 94185297 |
| chr13 | 94190403 | 94190859 |
| chr13 | 94193270 | 94193802 |
| chr13 | 94205308 | 94205553 |
| chr13 | 94205959 | 94206109 |
| chr13 | 94212799 | 94212954 |
| chr13 | 94225660 | 94225815 |
| chr13 | 94242041 | 94242203 |
| chr13 | 94250770 | 94250920 |
| chr13 | 94257646 | 94257827 |
| chr13 | 94261036 | 94261277 |

|       |          |          |
|-------|----------|----------|
| chr13 | 94262579 | 94263053 |
| chr13 | 94264071 | 94264233 |
| chr13 | 94271451 | 94271637 |
| chr13 | 94284571 | 94284789 |
| chr13 | 94284837 | 94285200 |
| chr13 | 94285200 | 94285577 |
| chr13 | 94285577 | 94285941 |
| chr13 | 94297772 | 94297992 |
| chr13 | 94298451 | 94298812 |
| chr13 | 94312770 | 94313181 |
| chr13 | 94327997 | 94328505 |
| chr13 | 94358229 | 94358529 |
| chr13 | 94358529 | 94358787 |
| chr13 | 94358787 | 94359506 |
| chr13 | 94368037 | 94368187 |
| chr13 | 94391864 | 94392162 |
| chr13 | 94435061 | 94435220 |
| chr13 | 94438778 | 94439068 |
| chr13 | 94451321 | 94451523 |
| chr13 | 94468577 | 94468878 |
| chr13 | 94504561 | 94504831 |
| chr13 | 94515058 | 94515339 |
| chr13 | 94523299 | 94523511 |
| chr13 | 94559725 | 94559875 |
| chr13 | 94560091 | 94560321 |
| chr13 | 94567779 | 94568009 |
| chr13 | 94702583 | 94702845 |
| chr13 | 94702864 | 94703078 |
| chr13 | 94709857 | 94710067 |
| chr13 | 94788702 | 94789048 |
| chr13 | 94789048 | 94789267 |
| chr13 | 94789267 | 94789673 |
| chr13 | 94806380 | 94806565 |
| chr13 | 94812430 | 94812610 |
| chr13 | 94827943 | 94828173 |
| chr13 | 94828350 | 94828527 |
| chr13 | 94828700 | 94828900 |
| chr13 | 94828900 | 94829076 |
| chr13 | 94829446 | 94829690 |
| chr13 | 94829690 | 94829921 |
| chr13 | 94829929 | 94830267 |
| chr13 | 94837346 | 94837541 |



|       |          |          |
|-------|----------|----------|
| chr13 | 94838117 | 94838390 |
| chr13 | 94838852 | 94839007 |
| chr13 | 94843092 | 94843378 |
| chr13 | 94844207 | 94844382 |
| chr13 | 94857091 | 94857403 |
| chr13 | 94868484 | 94868985 |
| chr13 | 94873682 | 94873873 |
| chr13 | 94882676 | 94882983 |
| chr13 | 94883087 | 94883694 |
| chr13 | 94941332 | 94941548 |
| chr13 | 94950793 | 94951369 |
| chr13 | 94955756 | 94955969 |
| chr13 | 94956051 | 94956277 |
| chr13 | 94975878 | 94976457 |
| chr13 | 94976457 | 94976770 |
| chr13 | 95018124 | 95018279 |
| chr13 | 95038214 | 95038694 |
| chr13 | 95038694 | 95038988 |
| chr13 | 95043445 | 95043601 |
| chr13 | 95049379 | 95049710 |
| chr13 | 95075616 | 95075948 |
| chr13 | 95103094 | 95103291 |
| chr13 | 95135150 | 95135310 |
| chr13 | 95135498 | 95135648 |
| chr13 | 95145989 | 95146227 |
| chr13 | 95187299 | 95187498 |
| chr13 | 95207179 | 95207330 |
| chr13 | 95215684 | 95215946 |
| chr13 | 95215946 | 95216235 |
| chr13 | 95222698 | 95222897 |
| chr13 | 95261515 | 95261724 |
| chr13 | 95287054 | 95287340 |
| chr13 | 95290197 | 95290347 |
| chr13 | 95324267 | 95324539 |
| chr13 | 95324610 | 95324992 |
| chr13 | 95324992 | 95325502 |
| chr13 | 95325502 | 95325953 |
| chr13 | 95326608 | 95326843 |
| chr13 | 95347034 | 95347636 |
| chr13 | 95370712 | 95370914 |
| chr13 | 95374666 | 95375006 |
| chr13 | 95375006 | 95375233 |

|       |          |          |
|-------|----------|----------|
| chr13 | 95375233 | 95375535 |
| chr13 | 95376899 | 95377198 |
| chr13 | 95381300 | 95381590 |
| chr13 | 95384230 | 95384498 |
| chr13 | 95388073 | 95388297 |
| chr13 | 95388324 | 95388484 |
| chr13 | 95389121 | 95389420 |
| chr13 | 95390249 | 95390529 |
| chr13 | 95390529 | 95390827 |
| chr13 | 95412353 | 95412553 |
| chr13 | 95413590 | 95413929 |
| chr13 | 95413929 | 95414256 |
| chr13 | 95424873 | 95425198 |
| chr13 | 95427234 | 95427547 |
| chr13 | 95427547 | 95427970 |
| chr13 | 95443476 | 95443671 |
| chr13 | 95443704 | 95444010 |
| chr13 | 95444010 | 95444243 |
| chr13 | 95444765 | 95445029 |
| chr13 | 95450534 | 95450830 |
| chr13 | 95450830 | 95451170 |
| chr13 | 95451462 | 95451883 |
| chr13 | 95469700 | 95470030 |
| chr13 | 95470896 | 95471328 |
| chr13 | 95481490 | 95481774 |
| chr13 | 95484659 | 95485250 |
| chr13 | 95491912 | 95492236 |
| chr13 | 95506798 | 95507200 |
| chr13 | 95507387 | 95507581 |
| chr13 | 95514775 | 95515088 |
| chr13 | 95515088 | 95515372 |
| chr13 | 95524168 | 95524460 |
| chr13 | 95524470 | 95524693 |
| chr13 | 95524693 | 95525095 |
| chr13 | 95525095 | 95525651 |
| chr13 | 95529285 | 95529529 |
| chr13 | 95535245 | 95535504 |
| chr13 | 95535504 | 95535888 |
| chr13 | 95545631 | 95546121 |
| chr13 | 95546121 | 95546557 |
| chr13 | 95546557 | 95546813 |
| chr13 | 95548333 | 95548851 |

|       |          |          |
|-------|----------|----------|
| chr13 | 95551944 | 95552310 |
| chr13 | 95553840 | 95554471 |
| chr13 | 95563056 | 95563405 |
| chr13 | 95563747 | 95564128 |
| chr13 | 95583682 | 95583966 |
| chr13 | 95584879 | 95585217 |
| chr13 | 95585217 | 95585573 |
| chr13 | 95595955 | 95596196 |
| chr13 | 95598344 | 95598695 |
| chr13 | 95598695 | 95598979 |
| chr13 | 95599005 | 95599160 |
| chr13 | 95599630 | 95600021 |
| chr13 | 95600021 | 95600248 |
| chr13 | 95600886 | 95601103 |
| chr13 | 95601411 | 95601717 |
| chr13 | 95602631 | 95602785 |
| chr13 | 95608309 | 95608492 |
| chr13 | 95608502 | 95608776 |
| chr13 | 95608776 | 95609243 |
| chr13 | 95611216 | 95611539 |
| chr13 | 95611779 | 95612098 |
| chr13 | 95617990 | 95618188 |
| chr13 | 95618246 | 95618557 |
| chr13 | 95618557 | 95618852 |
| chr13 | 95622895 | 95623426 |
| chr13 | 95630781 | 95631014 |
| chr13 | 95633313 | 95633934 |
| chr13 | 95633971 | 95634188 |
| chr13 | 95634425 | 95634797 |
| chr13 | 95640190 | 95640364 |
| chr13 | 95640463 | 95640957 |
| chr13 | 95640957 | 95641274 |
| chr13 | 95641274 | 95641718 |
| chr13 | 95643716 | 95644110 |
| chr13 | 95650905 | 95651108 |
| chr13 | 95667177 | 95667570 |
| chr13 | 95667570 | 95667780 |
| chr13 | 95679768 | 95680114 |
| chr13 | 95684761 | 95685163 |
| chr13 | 95685811 | 95686033 |
| chr13 | 95686106 | 95686667 |
| chr13 | 95696791 | 95697225 |

|       |          |          |
|-------|----------|----------|
| chr13 | 95700128 | 95700372 |
| chr13 | 95705320 | 95705653 |
| chr13 | 95705653 | 95706019 |
| chr13 | 95706172 | 95706439 |
| chr13 | 95719335 | 95719686 |
| chr13 | 95719686 | 95719955 |
| chr13 | 95719955 | 95720250 |
| chr13 | 95722585 | 95722737 |
| chr13 | 95746574 | 95746791 |
| chr13 | 95776937 | 95777120 |
| chr13 | 95777263 | 95777596 |
| chr13 | 95783056 | 95783216 |
| chr13 | 95794360 | 95794680 |
| chr13 | 95805771 | 95805975 |
| chr13 | 95813687 | 95813946 |
| chr13 | 95820243 | 95820414 |
| chr13 | 95828833 | 95829076 |
| chr13 | 95831456 | 95831615 |
| chr13 | 95831764 | 95832160 |
| chr13 | 95843504 | 95844075 |
| chr13 | 95849387 | 95849796 |
| chr13 | 95888266 | 95888499 |
| chr13 | 95889871 | 95890022 |
| chr13 | 95890029 | 95890479 |
| chr13 | 95890942 | 95891248 |
| chr13 | 95891248 | 95891509 |
| chr13 | 95891594 | 95891933 |
| chr13 | 95891933 | 95892326 |
| chr13 | 95921460 | 95922039 |
| chr13 | 95922669 | 95923070 |
| chr13 | 95924226 | 95924506 |
| chr13 | 95924506 | 95924713 |
| chr13 | 95938077 | 95938384 |
| chr13 | 95939264 | 95939539 |
| chr13 | 95941273 | 95941495 |
| chr13 | 95948894 | 95949197 |
| chr13 | 95955248 | 95955554 |
| chr13 | 95955554 | 95955790 |
| chr13 | 95968079 | 95968383 |
| chr13 | 95973361 | 95973750 |
| chr13 | 95988169 | 95988522 |
| chr13 | 96010751 | 96011147 |

|       |          |          |
|-------|----------|----------|
| chr13 | 96011147 | 96011672 |
| chr13 | 96015577 | 96015889 |
| chr13 | 96030769 | 96030931 |
| chr13 | 96039436 | 96039921 |
| chr13 | 96049930 | 96050119 |
| chr13 | 96131114 | 96131429 |
| chr13 | 96132502 | 96132782 |
| chr13 | 96346612 | 96346899 |
| chr13 | 96351365 | 96351645 |
| chr13 | 96387925 | 96388567 |
| chr13 | 96388577 | 96388787 |
| chr13 | 96407084 | 96407304 |
| chr13 | 96431779 | 96432096 |
| chr13 | 96432360 | 96432809 |
| chr13 | 96436189 | 96436518 |
| chr13 | 96441455 | 96441690 |
| chr13 | 96451467 | 96451709 |
| chr13 | 96460713 | 96460863 |
| chr13 | 96470599 | 96470986 |
| chr13 | 96479547 | 96480025 |
| chr13 | 96480185 | 96480641 |
| chr13 | 96487241 | 96487908 |
| chr13 | 96510278 | 96510450 |
| chr13 | 96510479 | 96511005 |
| chr13 | 96511005 | 96511304 |
| chr13 | 96511304 | 96511640 |
| chr13 | 96521806 | 96522291 |
| chr13 | 96533557 | 96534199 |
| chr13 | 96538185 | 96538413 |
| chr13 | 96542237 | 96542473 |
| chr13 | 96542473 | 96542788 |
| chr13 | 96542788 | 96543148 |
| chr13 | 96543148 | 96543485 |
| chr13 | 96543485 | 96543707 |
| chr13 | 96574268 | 96574499 |
| chr13 | 96576126 | 96576302 |
| chr13 | 96591371 | 96591585 |
| chr13 | 96593715 | 96593889 |
| chr13 | 96617908 | 96618207 |
| chr13 | 96644260 | 96644460 |
| chr13 | 96645912 | 96646131 |
| chr13 | 96647167 | 96647398 |

|       |          |          |
|-------|----------|----------|
| chr13 | 96647398 | 96647654 |
| chr13 | 96647925 | 96648151 |
| chr13 | 96648154 | 96648529 |
| chr13 | 96655064 | 96655294 |
| chr13 | 96658476 | 96658626 |
| chr13 | 96670333 | 96671275 |
| chr13 | 96677145 | 96677426 |
| chr13 | 96680519 | 96680790 |
| chr13 | 96680790 | 96681038 |
| chr13 | 96681090 | 96681373 |
| chr13 | 96681373 | 96681665 |
| chr13 | 96681738 | 96681903 |
| chr13 | 96696967 | 96697124 |
| chr13 | 96697712 | 96698126 |
| chr13 | 96743023 | 96743184 |
| chr13 | 96792221 | 96792385 |
| chr13 | 96792684 | 96793004 |
| chr13 | 96793142 | 96793463 |
| chr13 | 96793463 | 96793757 |
| chr13 | 96793770 | 96794099 |
| chr13 | 96808009 | 96808439 |
| chr13 | 96808439 | 96808696 |
| chr13 | 96855270 | 96855499 |
| chr13 | 96870908 | 96871088 |
| chr13 | 96906776 | 96907143 |
| chr13 | 96924128 | 96924473 |
| chr13 | 96924473 | 96924992 |
| chr13 | 96925000 | 96925280 |
| chr13 | 96925280 | 96925594 |
| chr13 | 96926462 | 96926612 |
| chr13 | 96928534 | 96928751 |
| chr13 | 96937879 | 96938440 |
| chr13 | 96939378 | 96939543 |
| chr13 | 96939650 | 96940102 |
| chr13 | 96962790 | 96963383 |
| chr13 | 96971077 | 96971427 |
| chr13 | 96973429 | 96973711 |
| chr13 | 96997144 | 96997405 |
| chr13 | 96999069 | 96999593 |
| chr13 | 97001315 | 97001798 |
| chr13 | 97001866 | 97002018 |
| chr13 | 97007469 | 97007720 |

|       |          |          |
|-------|----------|----------|
| chr13 | 97007952 | 97008261 |
| chr13 | 97008261 | 97008529 |
| chr13 | 97008533 | 97008736 |
| chr13 | 97008736 | 97009087 |
| chr13 | 97021911 | 97022176 |
| chr13 | 97022176 | 97022430 |
| chr13 | 97050332 | 97050531 |
| chr13 | 97052683 | 97053034 |
| chr13 | 97064971 | 97065121 |
| chr13 | 97071169 | 97071578 |
| chr13 | 97071578 | 97071837 |
| chr13 | 97071837 | 97072205 |
| chr13 | 97075584 | 97075982 |
| chr13 | 97082464 | 97082826 |
| chr13 | 97082826 | 97083093 |
| chr13 | 97099543 | 97099779 |
| chr13 | 97137525 | 97137800 |
| chr13 | 97137800 | 97138074 |
| chr13 | 97138074 | 97138357 |
| chr13 | 97138509 | 97138694 |
| chr13 | 97145898 | 97146138 |
| chr13 | 97172795 | 97173202 |
| chr13 | 97186434 | 97186686 |
| chr13 | 97190470 | 97190703 |
| chr13 | 97192694 | 97192844 |
| chr13 | 97197831 | 97198222 |
| chr13 | 97198222 | 97198598 |
| chr13 | 97201225 | 97201432 |
| chr13 | 97205090 | 97205433 |
| chr13 | 97205433 | 97205708 |
| chr13 | 97227705 | 97227964 |
| chr13 | 97235106 | 97235380 |
| chr13 | 97238285 | 97238535 |
| chr13 | 97240250 | 97240521 |
| chr13 | 97240521 | 97240901 |
| chr13 | 97240901 | 97241290 |
| chr13 | 97241290 | 97241541 |
| chr13 | 97241541 | 97241774 |
| chr13 | 97248534 | 97248768 |
| chr13 | 97248853 | 97249563 |
| chr13 | 97249563 | 97250110 |
| chr13 | 97250177 | 97250416 |

|       |          |          |
|-------|----------|----------|
| chr13 | 97254188 | 97254341 |
| chr13 | 97256951 | 97257326 |
| chr13 | 97271461 | 97272240 |
| chr13 | 97275019 | 97275228 |
| chr13 | 97282212 | 97282571 |
| chr13 | 97292121 | 97292356 |
| chr13 | 97299877 | 97300248 |
| chr13 | 97300248 | 97300556 |
| chr13 | 97300556 | 97300961 |
| chr13 | 97305503 | 97305696 |
| chr13 | 97305696 | 97305910 |
| chr13 | 97309765 | 97310062 |
| chr13 | 97310236 | 97310427 |
| chr13 | 97310514 | 97310873 |
| chr13 | 97311497 | 97311750 |
| chr13 | 97311935 | 97312398 |
| chr13 | 97318333 | 97318516 |
| chr13 | 97321369 | 97321731 |
| chr13 | 97355554 | 97355759 |
| chr13 | 97357055 | 97357205 |
| chr13 | 97362711 | 97363466 |
| chr13 | 97363745 | 97364382 |
| chr13 | 97372443 | 97372593 |
| chr13 | 97385657 | 97385864 |
| chr13 | 97386470 | 97386863 |
| chr13 | 97386863 | 97387148 |
| chr13 | 97387670 | 97387839 |
| chr13 | 97390414 | 97390693 |
| chr13 | 97395389 | 97395621 |
| chr13 | 97398635 | 97398949 |
| chr13 | 97404964 | 97405152 |
| chr13 | 97406846 | 97407143 |
| chr13 | 97419039 | 97419426 |
| chr13 | 97429681 | 97429965 |
| chr13 | 97442827 | 97443170 |
| chr13 | 97443354 | 97443551 |
| chr13 | 97443684 | 97444100 |
| chr13 | 97444100 | 97444422 |
| chr13 | 97462358 | 97462556 |
| chr13 | 97471838 | 97472006 |
| chr13 | 97482526 | 97482748 |
| chr13 | 97485978 | 97486296 |



|       |          |          |
|-------|----------|----------|
| chr13 | 97497203 | 97497493 |
| chr13 | 97497493 | 97497885 |
| chr13 | 97503116 | 97503381 |
| chr13 | 97503489 | 97503852 |
| chr13 | 97504984 | 97505434 |
| chr13 | 97510900 | 97511456 |
| chr13 | 97512637 | 97512863 |
| chr13 | 97524151 | 97524359 |
| chr13 | 97524923 | 97525073 |
| chr13 | 97526784 | 97526943 |
| chr13 | 97530575 | 97530925 |
| chr13 | 97533836 | 97534177 |
| chr13 | 97534177 | 97534617 |
| chr13 | 97539784 | 97540007 |
| chr13 | 97545984 | 97546134 |
| chr13 | 97546139 | 97546512 |
| chr13 | 97550886 | 97551168 |
| chr13 | 97551168 | 97551441 |
| chr13 | 97587176 | 97587404 |
| chr13 | 97594861 | 97595106 |
| chr13 | 97604472 | 97604842 |
| chr13 | 97613709 | 97613975 |
| chr13 | 97621378 | 97621688 |
| chr13 | 97626688 | 97627143 |
| chr13 | 97638497 | 97638829 |
| chr13 | 97644791 | 97644984 |
| chr13 | 97678267 | 97678943 |
| chr13 | 97678943 | 97679223 |
| chr13 | 97764117 | 97764354 |
| chr13 | 97781629 | 97781931 |
| chr13 | 97825487 | 97825661 |
| chr13 | 97841530 | 97841857 |
| chr13 | 97842730 | 97842982 |
| chr13 | 97849123 | 97849468 |
| chr13 | 97853003 | 97853164 |
| chr13 | 97882580 | 97882730 |
| chr13 | 97915611 | 97915910 |
| chr13 | 97916184 | 97916527 |
| chr13 | 97916527 | 97916775 |
| chr13 | 97927840 | 97928112 |
| chr13 | 97928112 | 97928376 |
| chr13 | 97938928 | 97939274 |

|       |          |          |
|-------|----------|----------|
| chr13 | 97939342 | 97939834 |
| chr13 | 97945430 | 97945630 |
| chr13 | 97976562 | 97977093 |
| chr13 | 97990886 | 97991409 |
| chr13 | 98002352 | 98002508 |
| chr13 | 98002644 | 98002924 |
| chr13 | 98004744 | 98004950 |
| chr13 | 98005618 | 98005926 |
| chr13 | 98007366 | 98007536 |
| chr13 | 98008683 | 98008907 |
| chr13 | 98013635 | 98014131 |
| chr13 | 98015988 | 98016280 |
| chr13 | 98016280 | 98016574 |
| chr13 | 98016581 | 98016747 |
| chr13 | 98016986 | 98017183 |
| chr13 | 98027221 | 98027435 |
| chr13 | 98027455 | 98027673 |
| chr13 | 98027673 | 98027955 |
| chr13 | 98027955 | 98028459 |
| chr13 | 98031334 | 98031590 |
| chr13 | 98038807 | 98038957 |
| chr13 | 98040711 | 98040923 |
| chr13 | 98076952 | 98077233 |
| chr13 | 98077311 | 98077523 |
| chr13 | 98093018 | 98093308 |
| chr13 | 98105186 | 98105466 |
| chr13 | 98111099 | 98111317 |
| chr13 | 98113111 | 98113371 |
| chr13 | 98120608 | 98120949 |
| chr13 | 98121894 | 98122364 |
| chr13 | 98124229 | 98124451 |
| chr13 | 98124451 | 98124685 |
| chr13 | 98132821 | 98133376 |
| chr13 | 98133376 | 98133708 |
| chr13 | 98140579 | 98141054 |
| chr13 | 98146543 | 98147085 |
| chr13 | 98147558 | 98147779 |
| chr13 | 98148416 | 98148655 |
| chr13 | 98149501 | 98149755 |
| chr13 | 98152692 | 98152992 |
| chr13 | 98176529 | 98176701 |
| chr13 | 98180611 | 98180834 |

|       |          |          |
|-------|----------|----------|
| chr13 | 98183201 | 98183395 |
| chr13 | 98187346 | 98187612 |
| chr13 | 98192332 | 98192679 |
| chr13 | 98192679 | 98192905 |
| chr13 | 98192905 | 98193210 |
| chr13 | 98198933 | 98199225 |
| chr13 | 98199677 | 98199856 |
| chr13 | 98200754 | 98201077 |
| chr13 | 98202770 | 98203015 |
| chr13 | 98205570 | 98206028 |
| chr13 | 98206028 | 98206335 |
| chr13 | 98206335 | 98206706 |
| chr13 | 98222915 | 98223243 |
| chr13 | 98239799 | 98239966 |
| chr13 | 98240109 | 98240264 |
| chr13 | 98240322 | 98240495 |
| chr13 | 98255039 | 98255305 |
| chr13 | 98262629 | 98263057 |
| chr13 | 98263057 | 98263257 |
| chr13 | 98263257 | 98263673 |
| chr13 | 98275429 | 98276140 |
| chr13 | 98281087 | 98281524 |
| chr13 | 98290807 | 98291013 |
| chr13 | 98295965 | 98296470 |
| chr13 | 98298892 | 98299119 |
| chr13 | 98299119 | 98299394 |
| chr13 | 98305325 | 98305607 |
| chr13 | 98307239 | 98307392 |
| chr13 | 98307673 | 98307980 |
| chr13 | 98308099 | 98308327 |
| chr13 | 98316322 | 98316662 |
| chr13 | 98316662 | 98316868 |
| chr13 | 98316868 | 98317347 |
| chr13 | 98317408 | 98317558 |
| chr13 | 98332173 | 98332428 |
| chr13 | 98351606 | 98351821 |
| chr13 | 98354092 | 98354354 |
| chr13 | 98354354 | 98354754 |
| chr13 | 98354754 | 98355101 |
| chr13 | 98355101 | 98355299 |
| chr13 | 98355299 | 98355536 |
| chr13 | 98355536 | 98355794 |

|       |          |          |
|-------|----------|----------|
| chr13 | 98355822 | 98356007 |
| chr13 | 98365778 | 98366108 |
| chr13 | 98366148 | 98366597 |
| chr13 | 98377825 | 98378064 |
| chr13 | 98391142 | 98391330 |
| chr13 | 98391330 | 98391556 |
| chr13 | 98427870 | 98428021 |
| chr13 | 98435283 | 98435575 |
| chr13 | 98435660 | 98435888 |
| chr13 | 98453346 | 98453516 |
| chr13 | 98456397 | 98456878 |
| chr13 | 98468196 | 98468439 |
| chr13 | 98477748 | 98478039 |
| chr13 | 98478039 | 98478379 |
| chr13 | 98478379 | 98478774 |
| chr13 | 98491832 | 98492134 |
| chr13 | 98494907 | 98495245 |
| chr13 | 98495275 | 98495505 |
| chr13 | 98495505 | 98495699 |
| chr13 | 98497540 | 98497936 |
| chr13 | 98498049 | 98498463 |
| chr13 | 98504522 | 98505213 |
| chr13 | 98518438 | 98518642 |
| chr13 | 98533418 | 98533763 |
| chr13 | 98534157 | 98534595 |
| chr13 | 98534631 | 98534856 |
| chr13 | 98534856 | 98535136 |
| chr13 | 98588529 | 98588889 |
| chr13 | 98588889 | 98589244 |
| chr13 | 98589244 | 98589569 |
| chr13 | 98596787 | 98596948 |
| chr13 | 98598166 | 98598318 |
| chr13 | 98600902 | 98601086 |
| chr13 | 98611833 | 98612107 |
| chr13 | 98622547 | 98622968 |
| chr13 | 98622994 | 98623261 |
| chr13 | 98623261 | 98623695 |
| chr13 | 98632302 | 98632872 |
| chr13 | 98635232 | 98635559 |
| chr13 | 98648280 | 98648476 |
| chr13 | 98648757 | 98648907 |
| chr13 | 98651064 | 98651527 |

|       |          |          |
|-------|----------|----------|
| chr13 | 98651527 | 98651844 |
| chr13 | 98668195 | 98668367 |
| chr13 | 98679253 | 98679650 |
| chr13 | 98679650 | 98680233 |
| chr13 | 98684332 | 98684687 |
| chr13 | 98691930 | 98692142 |
| chr13 | 98692142 | 98692494 |
| chr13 | 98692683 | 98692980 |
| chr13 | 98693010 | 98693268 |
| chr13 | 98693289 | 98693605 |
| chr13 | 98694746 | 98695074 |
| chr13 | 98701095 | 98701335 |
| chr13 | 98701881 | 98702140 |
| chr13 | 98704428 | 98704702 |
| chr13 | 98715542 | 98716199 |
| chr13 | 98722343 | 98722623 |
| chr13 | 98726568 | 98726804 |
| chr13 | 98747026 | 98747212 |
| chr13 | 98768473 | 98768637 |
| chr13 | 98773006 | 98773209 |
| chr13 | 98809185 | 98809335 |
| chr13 | 98814707 | 98815045 |
| chr13 | 98815089 | 98815525 |
| chr13 | 98815525 | 98815807 |
| chr13 | 98818109 | 98818646 |
| chr13 | 98819158 | 98819388 |
| chr13 | 98826069 | 98826265 |
| chr13 | 98831148 | 98831398 |
| chr13 | 98834031 | 98834213 |
| chr13 | 98834312 | 98834496 |
| chr13 | 98836736 | 98837053 |
| chr13 | 98867905 | 98868170 |
| chr13 | 98871236 | 98871598 |
| chr13 | 98890123 | 98890635 |
| chr13 | 98890635 | 98890896 |
| chr13 | 98890896 | 98891221 |
| chr13 | 98891472 | 98891771 |
| chr13 | 98894021 | 98894302 |
| chr13 | 98896562 | 98896740 |
| chr13 | 98896787 | 98896988 |
| chr13 | 98912698 | 98912962 |
| chr13 | 98915642 | 98915974 |

|       |          |          |
|-------|----------|----------|
| chr13 | 98916287 | 98916606 |
| chr13 | 98917968 | 98918137 |
| chr13 | 98921978 | 98922196 |
| chr13 | 98925550 | 98925828 |
| chr13 | 98925833 | 98926187 |
| chr13 | 98926187 | 98926547 |
| chr13 | 98926547 | 98926880 |
| chr13 | 98931629 | 98931874 |
| chr13 | 98941875 | 98942335 |
| chr13 | 98944643 | 98944866 |
| chr13 | 98946534 | 98946816 |
| chr13 | 98954732 | 98954910 |
| chr13 | 98955249 | 98955658 |
| chr13 | 98955684 | 98955936 |
| chr13 | 98971047 | 98971307 |
| chr13 | 98971307 | 98971632 |
| chr13 | 98971632 | 98971970 |
| chr13 | 98986656 | 98986954 |
| chr13 | 98994912 | 98995247 |
| chr13 | 99037289 | 99037593 |
| chr13 | 99038331 | 99038703 |
| chr13 | 99046460 | 99046630 |
| chr13 | 99055644 | 99055869 |
| chr13 | 99058186 | 99058470 |
| chr13 | 99058477 | 99059020 |
| chr13 | 99063085 | 99063243 |
| chr13 | 99067489 | 99067790 |
| chr13 | 99070556 | 99070706 |
| chr13 | 99077142 | 99077322 |
| chr13 | 99085035 | 99085288 |
| chr13 | 99085336 | 99085493 |
| chr13 | 99085575 | 99085768 |
| chr13 | 99085768 | 99085964 |
| chr13 | 99087836 | 99088181 |
| chr13 | 99088316 | 99088639 |
| chr13 | 99093377 | 99093667 |
| chr13 | 99094090 | 99094608 |
| chr13 | 99100431 | 99100801 |
| chr13 | 99100867 | 99101020 |
| chr13 | 99105298 | 99105474 |
| chr13 | 99108584 | 99108950 |
| chr13 | 99116946 | 99117156 |

|       |          |          |
|-------|----------|----------|
| chr13 | 99124849 | 99125283 |
| chr13 | 99125843 | 99126056 |
| chr13 | 99126056 | 99126262 |
| chr13 | 99128467 | 99128840 |
| chr13 | 99142448 | 99142977 |
| chr13 | 99143322 | 99143574 |
| chr13 | 99150675 | 99150939 |
| chr13 | 99150942 | 99151094 |
| chr13 | 99152262 | 99152618 |
| chr13 | 99152618 | 99152992 |
| chr13 | 99157808 | 99158012 |
| chr13 | 99158528 | 99158705 |
| chr13 | 99158712 | 99159288 |
| chr13 | 99163891 | 99164041 |
| chr13 | 99164137 | 99164301 |
| chr13 | 99169460 | 99169789 |
| chr13 | 99170359 | 99170829 |
| chr13 | 99173292 | 99173630 |
| chr13 | 99194233 | 99194540 |
| chr13 | 99194540 | 99194909 |
| chr13 | 99216479 | 99216835 |
| chr13 | 99218043 | 99218334 |
| chr13 | 99220490 | 99220648 |
| chr13 | 99220836 | 99221209 |
| chr13 | 99223523 | 99223778 |
| chr13 | 99236876 | 99237071 |
| chr13 | 99237121 | 99237458 |
| chr13 | 99238203 | 99238428 |
| chr13 | 99238428 | 99238665 |
| chr13 | 99238665 | 99238949 |
| chr13 | 99238949 | 99239240 |
| chr13 | 99307483 | 99307633 |
| chr13 | 99307737 | 99308406 |
| chr13 | 99308406 | 99308857 |
| chr13 | 99314104 | 99314292 |
| chr13 | 99317196 | 99317346 |
| chr13 | 99317596 | 99317937 |
| chr13 | 99331311 | 99331566 |
| chr13 | 99331748 | 99331907 |
| chr13 | 99344245 | 99345070 |
| chr13 | 99352772 | 99353155 |
| chr13 | 99353155 | 99353563 |

|       |          |          |
|-------|----------|----------|
| chr13 | 99360255 | 99360616 |
| chr13 | 99375592 | 99375955 |
| chr13 | 99379386 | 99379536 |
| chr13 | 99384617 | 99384922 |
| chr13 | 99384922 | 99385219 |
| chr13 | 99385219 | 99385491 |
| chr13 | 99391082 | 99391471 |
| chr13 | 99391471 | 99391779 |
| chr13 | 99391779 | 99392086 |
| chr13 | 99395696 | 99395980 |
| chr13 | 99397423 | 99397547 |
| chr13 | 99397547 | 99397614 |
| chr13 | 99397881 | 99398130 |
| chr13 | 99398130 | 99398342 |
| chr13 | 99399414 | 99399701 |
| chr13 | 99403291 | 99403480 |
| chr13 | 99410428 | 99410649 |
| chr13 | 99410649 | 99410856 |
| chr13 | 99410856 | 99411389 |
| chr13 | 99412864 | 99413030 |
| chr13 | 99414417 | 99414625 |
| chr13 | 99416688 | 99416919 |
| chr13 | 99418505 | 99418690 |
| chr13 | 99431381 | 99431698 |
| chr13 | 99439414 | 99439681 |
| chr13 | 99441742 | 99442011 |
| chr13 | 99447415 | 99447859 |
| chr13 | 99449138 | 99449323 |
| chr13 | 99466137 | 99466289 |
| chr13 | 99475235 | 99475963 |
| chr13 | 99481477 | 99481764 |
| chr13 | 99502990 | 99503309 |
| chr13 | 99503639 | 99504027 |
| chr13 | 99514903 | 99515196 |
| chr13 | 99515196 | 99515501 |
| chr13 | 99515501 | 99515829 |
| chr13 | 99515829 | 99516116 |
| chr13 | 99516116 | 99516436 |
| chr13 | 99516436 | 99517136 |
| chr13 | 99528169 | 99528733 |
| chr13 | 99528733 | 99529009 |
| chr13 | 99534933 | 99535140 |



|       |           |           |
|-------|-----------|-----------|
| chr13 | 99540226  | 99540378  |
| chr13 | 99553074  | 99553224  |
| chr13 | 99553904  | 99554090  |
| chr13 | 99592484  | 99592881  |
| chr13 | 99592881  | 99593289  |
| chr13 | 99606733  | 99606895  |
| chr13 | 99607343  | 99607494  |
| chr13 | 99610467  | 99610887  |
| chr13 | 99647158  | 99647441  |
| chr13 | 99647607  | 99648343  |
| chr13 | 99761865  | 99762112  |
| chr13 | 99775999  | 99776285  |
| chr13 | 99781254  | 99781408  |
| chr13 | 99790878  | 99791214  |
| chr13 | 99802844  | 99802994  |
| chr13 | 99830139  | 99830658  |
| chr13 | 99830999  | 99831263  |
| chr13 | 99834467  | 99834688  |
| chr13 | 99837854  | 99838035  |
| chr13 | 99842732  | 99842891  |
| chr13 | 99857897  | 99858263  |
| chr13 | 99859136  | 99859371  |
| chr13 | 99900436  | 99900822  |
| chr13 | 99902871  | 99903251  |
| chr13 | 99920843  | 99921124  |
| chr13 | 99921201  | 99921911  |
| chr13 | 99937913  | 99938111  |
| chr13 | 99996967  | 99997180  |
| chr13 | 100001834 | 100002206 |
| chr13 | 100014999 | 100015151 |
| chr13 | 100015258 | 100015532 |
| chr13 | 100015532 | 100015922 |
| chr13 | 100023943 | 100024094 |
| chr13 | 100035010 | 100035203 |
| chr13 | 100078223 | 100078501 |
| chr13 | 100101132 | 100101282 |
| chr13 | 100103597 | 100103928 |
| chr13 | 100103928 | 100104237 |
| chr13 | 100107746 | 100108195 |
| chr13 | 100108195 | 100108545 |
| chr13 | 100112390 | 100112579 |
| chr13 | 100124689 | 100125202 |

|       |           |           |
|-------|-----------|-----------|
| chr13 | 100125316 | 100125691 |
| chr13 | 100125742 | 100125981 |
| chr13 | 100152159 | 100152349 |
| chr13 | 100152349 | 100152557 |
| chr13 | 100152712 | 100152897 |
| chr13 | 100173478 | 100173854 |
| chr13 | 100210614 | 100210885 |
| chr13 | 100341749 | 100342240 |
| chr13 | 100398733 | 100398953 |
| chr13 | 100411868 | 100412368 |
| chr13 | 100419610 | 100419760 |
| chr13 | 100419828 | 100420133 |
| chr13 | 100438622 | 100439055 |
| chr13 | 100439143 | 100439300 |
| chr13 | 100440284 | 100440495 |
| chr13 | 100449514 | 100449995 |
| chr13 | 100451722 | 100451906 |
| chr13 | 100453732 | 100454023 |
| chr13 | 100457717 | 100458072 |
| chr13 | 100461248 | 100461831 |
| chr13 | 100463454 | 100463855 |
| chr13 | 100463855 | 100464147 |
| chr13 | 100492062 | 100492284 |
| chr13 | 100492284 | 100492554 |
| chr13 | 100492554 | 100492831 |
| chr13 | 100493313 | 100493694 |
| chr13 | 100494838 | 100494990 |
| chr13 | 100496015 | 100496215 |
| chr13 | 100510831 | 100511070 |
| chr13 | 100511133 | 100511505 |
| chr13 | 100511505 | 100511786 |
| chr13 | 100514058 | 100514365 |
| chr13 | 100516635 | 100517169 |
| chr13 | 100521769 | 100522032 |
| chr13 | 100522205 | 100522635 |
| chr13 | 100522833 | 100522989 |
| chr13 | 100523192 | 100523387 |
| chr13 | 100532927 | 100533332 |
| chr13 | 100534280 | 100534440 |
| chr13 | 100535216 | 100535625 |
| chr13 | 100535908 | 100536169 |
| chr13 | 100536169 | 100536371 |

|       |           |           |
|-------|-----------|-----------|
| chr13 | 100536371 | 100536582 |
| chr13 | 100536822 | 100536992 |
| chr13 | 100543079 | 100543367 |
| chr13 | 100543367 | 100543729 |
| chr13 | 100547536 | 100547937 |
| chr13 | 100551285 | 100551565 |
| chr13 | 100551565 | 100551835 |
| chr13 | 100551973 | 100552138 |
| chr13 | 100552176 | 100552837 |
| chr13 | 100552837 | 100553075 |
| chr13 | 100553115 | 100553349 |
| chr13 | 100568476 | 100568728 |
| chr13 | 100576087 | 100576283 |
| chr13 | 100580043 | 100580254 |
| chr13 | 100581479 | 100581757 |
| chr13 | 100581757 | 100581981 |
| chr13 | 100581981 | 100582238 |
| chr13 | 100582238 | 100582523 |
| chr13 | 100589070 | 100589273 |
| chr13 | 100592595 | 100592857 |
| chr13 | 100592857 | 100593168 |
| chr13 | 100593974 | 100594514 |
| chr13 | 100600591 | 100600791 |
| chr13 | 100602661 | 100602878 |
| chr13 | 100607832 | 100608042 |
| chr13 | 100609225 | 100609529 |
| chr13 | 100616263 | 100616549 |
| chr13 | 100616549 | 100616869 |
| chr13 | 100616869 | 100617141 |
| chr13 | 100628247 | 100628510 |
| chr13 | 100650598 | 100650917 |
| chr13 | 100650917 | 100651183 |
| chr13 | 100651183 | 100651473 |
| chr13 | 100651473 | 100651730 |
| chr13 | 100656257 | 100656409 |
| chr13 | 100657376 | 100657594 |
| chr13 | 100659457 | 100659711 |
| chr13 | 100659916 | 100660203 |
| chr13 | 100662389 | 100662710 |
| chr13 | 100662838 | 100663044 |
| chr13 | 100668362 | 100668625 |
| chr13 | 100669285 | 100669584 |

|       |           |           |
|-------|-----------|-----------|
| chr13 | 100669584 | 100669830 |
| chr13 | 100669830 | 100670087 |
| chr13 | 100670410 | 100670564 |
| chr13 | 100670585 | 100670803 |
| chr13 | 100684428 | 100684688 |
| chr13 | 100690545 | 100690813 |
| chr13 | 100690813 | 100691078 |
| chr13 | 100703612 | 100703797 |
| chr13 | 100730427 | 100731296 |
| chr13 | 100743811 | 100744053 |
| chr13 | 100744053 | 100744436 |
| chr13 | 100744436 | 100744836 |
| chr13 | 100756742 | 100756979 |
| chr13 | 100767315 | 100767541 |
| chr13 | 100775342 | 100775572 |
| chr13 | 100775572 | 100775799 |
| chr13 | 100775799 | 100776054 |
| chr13 | 100776054 | 100776272 |
| chr13 | 100776272 | 100776467 |
| chr13 | 100776522 | 100776672 |
| chr13 | 100786194 | 100786510 |
| chr13 | 100786510 | 100786839 |
| chr13 | 100786839 | 100787072 |
| chr13 | 100787411 | 100787661 |
| chr13 | 100804921 | 100805222 |
| chr13 | 100813923 | 100814182 |
| chr13 | 100832771 | 100833157 |
| chr13 | 100833157 | 100833718 |
| chr13 | 100843386 | 100843691 |
| chr13 | 100844016 | 100844249 |
| chr13 | 100846343 | 100846657 |
| chr13 | 100849183 | 100849436 |
| chr13 | 100853202 | 100853415 |
| chr13 | 100854060 | 100854285 |
| chr13 | 100854285 | 100854496 |
| chr13 | 100892225 | 100892471 |
| chr13 | 100940871 | 100941082 |
| chr13 | 100990756 | 100990906 |
| chr13 | 101017153 | 101017303 |
| chr13 | 101127849 | 101128121 |
| chr13 | 101161811 | 101162119 |
| chr13 | 101465487 | 101465694 |

|       |           |           |
|-------|-----------|-----------|
| chr13 | 101478590 | 101478999 |
| chr13 | 101479056 | 101479298 |
| chr13 | 101510044 | 101510194 |
| chr13 | 101510693 | 101510843 |
| chr13 | 101540392 | 101541067 |
| chr13 | 101547962 | 101548181 |
| chr13 | 101632857 | 101633093 |
| chr13 | 101634555 | 101634708 |
| chr13 | 101658355 | 101658585 |
| chr13 | 101659083 | 101659304 |
| chr13 | 101664099 | 101664262 |
| chr13 | 101692373 | 101692558 |
| chr13 | 101694009 | 101694324 |
| chr13 | 101694463 | 101694771 |
| chr13 | 101694823 | 101695014 |
| chr13 | 101695014 | 101695218 |
| chr13 | 101695218 | 101695397 |
| chr13 | 101695946 | 101696181 |
| chr13 | 101712832 | 101712982 |
| chr13 | 101713068 | 101713406 |
| chr13 | 101717790 | 101718320 |
| chr13 | 101719304 | 101719456 |
| chr13 | 101721869 | 101722259 |
| chr13 | 101726796 | 101727492 |
| chr13 | 101735854 | 101736013 |
| chr13 | 101736753 | 101736913 |
| chr13 | 101740135 | 101740400 |
| chr13 | 101752260 | 101752412 |
| chr13 | 101753636 | 101754103 |
| chr13 | 101759257 | 101759596 |
| chr13 | 101760321 | 101760698 |
| chr13 | 101760698 | 101761007 |
| chr13 | 101767278 | 101767536 |
| chr13 | 101767569 | 101767821 |
| chr13 | 101767821 | 101768068 |
| chr13 | 101768068 | 101768282 |
| chr13 | 101768282 | 101768545 |
| chr13 | 101768545 | 101769005 |
| chr13 | 101945707 | 101945962 |
| chr13 | 102052862 | 102053194 |
| chr13 | 102053314 | 102053588 |
| chr13 | 102089243 | 102089440 |

|       |           |           |
|-------|-----------|-----------|
| chr13 | 102089552 | 102089911 |
| chr13 | 102103230 | 102103398 |
| chr13 | 102106362 | 102106728 |
| chr13 | 102107107 | 102107488 |
| chr13 | 102109003 | 102109389 |
| chr13 | 102109638 | 102109859 |
| chr13 | 102110114 | 102110272 |
| chr13 | 102122422 | 102122621 |
| chr13 | 102161231 | 102161519 |
| chr13 | 102167317 | 102167542 |
| chr13 | 102202393 | 102202690 |
| chr13 | 102216551 | 102216822 |
| chr13 | 102231108 | 102231419 |
| chr13 | 102257458 | 102257707 |
| chr13 | 102258228 | 102258466 |
| chr13 | 102482433 | 102482858 |
| chr13 | 102526852 | 102527067 |
| chr13 | 102573211 | 102573461 |
| chr13 | 102573461 | 102573724 |
| chr13 | 102573924 | 102574110 |
| chr13 | 102582376 | 102582674 |
| chr13 | 102583934 | 102584320 |
| chr13 | 102584320 | 102584558 |
| chr13 | 102639550 | 102639928 |
| chr13 | 102645010 | 102645164 |
| chr13 | 102674177 | 102674453 |
| chr13 | 102678512 | 102678854 |
| chr13 | 102697736 | 102697891 |
| chr13 | 102705900 | 102706205 |
| chr13 | 102727015 | 102727352 |
| chr13 | 102728081 | 102728233 |
| chr13 | 102728480 | 102728665 |
| chr13 | 102729834 | 102730109 |
| chr13 | 102730109 | 102730354 |
| chr13 | 102745079 | 102745252 |
| chr13 | 102745263 | 102745570 |
| chr13 | 102745570 | 102745962 |
| chr13 | 102745962 | 102746252 |
| chr13 | 102753741 | 102754158 |
| chr13 | 102756120 | 102756411 |
| chr13 | 102786771 | 102786952 |
| chr13 | 102794432 | 102794692 |

|       |           |           |
|-------|-----------|-----------|
| chr13 | 102820568 | 102820730 |
| chr13 | 102821248 | 102821648 |
| chr13 | 102827033 | 102827252 |
| chr13 | 102844000 | 102844595 |
| chr13 | 102844630 | 102844841 |
| chr13 | 102849098 | 102849367 |
| chr13 | 102850608 | 102850847 |
| chr13 | 102856931 | 102857380 |
| chr13 | 102857380 | 102857623 |
| chr13 | 102857623 | 102857869 |
| chr13 | 102857869 | 102858166 |
| chr13 | 102868449 | 102868828 |
| chr13 | 102869490 | 102869953 |
| chr13 | 102877087 | 102877563 |
| chr13 | 102880382 | 102880999 |
| chr13 | 102889085 | 102889245 |
| chr13 | 102894297 | 102894598 |
| chr13 | 102895854 | 102896291 |
| chr13 | 102897891 | 102898051 |
| chr13 | 102898721 | 102899250 |
| chr13 | 102899250 | 102899838 |
| chr13 | 102900641 | 102900907 |
| chr13 | 102905925 | 102906315 |
| chr13 | 102906315 | 102906594 |
| chr13 | 102906594 | 102907001 |
| chr13 | 102910116 | 102910343 |
| chr13 | 102914415 | 102914698 |
| chr13 | 102915334 | 102915487 |
| chr13 | 102931979 | 102932275 |
| chr13 | 102942531 | 102942996 |
| chr13 | 102943613 | 102943793 |
| chr13 | 102957408 | 102957644 |
| chr13 | 102957644 | 102957944 |
| chr13 | 102957944 | 102958368 |
| chr13 | 102958511 | 102958689 |
| chr13 | 102958689 | 102958889 |
| chr13 | 102958919 | 102959144 |
| chr13 | 102959144 | 102959418 |
| chr13 | 102963295 | 102963824 |
| chr13 | 102970232 | 102970480 |
| chr13 | 102981448 | 102981754 |
| chr13 | 102985657 | 102985911 |

|       |           |           |
|-------|-----------|-----------|
| chr13 | 102989754 | 102990027 |
| chr13 | 102990167 | 102990392 |
| chr13 | 103037871 | 103038099 |
| chr13 | 103049428 | 103049762 |
| chr13 | 103051408 | 103051589 |
| chr13 | 103071878 | 103072104 |
| chr13 | 103073394 | 103073854 |
| chr13 | 103083037 | 103083201 |
| chr13 | 103089169 | 103089350 |
| chr13 | 103096672 | 103097113 |
| chr13 | 103102511 | 103103274 |
| chr13 | 103109603 | 103109846 |
| chr13 | 103109846 | 103110247 |
| chr13 | 103110277 | 103110448 |
| chr13 | 103120937 | 103121203 |
| chr13 | 103151131 | 103151304 |
| chr13 | 103173850 | 103174094 |
| chr13 | 103186426 | 103186792 |
| chr13 | 103186792 | 103187130 |
| chr13 | 103201005 | 103201385 |
| chr13 | 103201385 | 103202006 |
| chr13 | 103207252 | 103207709 |
| chr13 | 103207839 | 103208044 |
| chr13 | 103211559 | 103211760 |
| chr13 | 103212626 | 103212781 |
| chr13 | 103225260 | 103225554 |
| chr13 | 103225587 | 103225780 |
| chr13 | 103226431 | 103226779 |
| chr13 | 103226779 | 103227002 |
| chr13 | 103238113 | 103238368 |
| chr13 | 103238368 | 103238687 |
| chr13 | 103239489 | 103240088 |
| chr13 | 103244116 | 103244339 |
| chr13 | 103245446 | 103245872 |
| chr13 | 103247253 | 103247409 |
| chr13 | 103260027 | 103260377 |
| chr13 | 103260421 | 103260747 |
| chr13 | 103260747 | 103260974 |
| chr13 | 103261476 | 103261692 |
| chr13 | 103271149 | 103271479 |
| chr13 | 103271883 | 103272183 |
| chr13 | 103279751 | 103279973 |



|       |           |           |
|-------|-----------|-----------|
| chr13 | 103290999 | 103291247 |
| chr13 | 103291247 | 103291530 |
| chr13 | 103303604 | 103303938 |
| chr13 | 103303938 | 103304303 |
| chr13 | 103304303 | 103304780 |
| chr13 | 103317612 | 103318453 |
| chr13 | 103319261 | 103319588 |
| chr13 | 103319673 | 103319831 |
| chr13 | 103321278 | 103321430 |
| chr13 | 103324761 | 103325003 |
| chr13 | 103327606 | 103328514 |
| chr13 | 103333612 | 103333932 |
| chr13 | 103333932 | 103334289 |
| chr13 | 103334289 | 103334782 |
| chr13 | 103344086 | 103344351 |
| chr13 | 103374516 | 103374806 |
| chr13 | 103386872 | 103387466 |
| chr13 | 103409327 | 103409593 |
| chr13 | 103410808 | 103411134 |
| chr13 | 103459562 | 103459830 |
| chr13 | 103491962 | 103492112 |
| chr13 | 103494472 | 103494695 |
| chr13 | 103539673 | 103539943 |
| chr13 | 103540686 | 103540978 |
| chr13 | 103609524 | 103609758 |
| chr13 | 103644455 | 103644808 |
| chr13 | 103645756 | 103645913 |
| chr13 | 103646095 | 103646332 |
| chr13 | 103670594 | 103670968 |
| chr13 | 103680764 | 103681197 |
| chr13 | 103681197 | 103681709 |
| chr13 | 103686418 | 103686832 |
| chr13 | 103686832 | 103687130 |
| chr13 | 103687130 | 103687519 |
| chr13 | 103695548 | 103695714 |
| chr13 | 103695957 | 103696269 |
| chr13 | 103696269 | 103696553 |
| chr13 | 103703398 | 103703731 |
| chr13 | 103711304 | 103711687 |
| chr13 | 103733372 | 103733553 |
| chr13 | 103735630 | 103735877 |
| chr13 | 103751475 | 103751700 |

|       |           |           |
|-------|-----------|-----------|
| chr13 | 103752148 | 103752459 |
| chr13 | 103756200 | 103756577 |
| chr13 | 103756633 | 103756903 |
| chr13 | 103759597 | 103759832 |
| chr13 | 103773836 | 103774115 |
| chr13 | 103774115 | 103774419 |
| chr13 | 103774419 | 103774937 |
| chr13 | 103795108 | 103795258 |
| chr13 | 103821480 | 103821769 |
| chr13 | 103838738 | 103838997 |
| chr13 | 103841305 | 103841656 |
| chr13 | 103841656 | 103841995 |
| chr13 | 103842233 | 103842415 |
| chr13 | 103847426 | 103847608 |
| chr13 | 103870936 | 103871103 |
| chr13 | 103884466 | 103884812 |
| chr13 | 103909990 | 103910176 |
| chr13 | 103920085 | 103920553 |
| chr13 | 103920553 | 103920915 |
| chr13 | 103920915 | 103921339 |
| chr13 | 103921339 | 103921849 |
| chr13 | 103962073 | 103962282 |
| chr13 | 103966415 | 103966565 |
| chr13 | 103977821 | 103978193 |
| chr13 | 103978193 | 103978573 |
| chr13 | 103978573 | 103978924 |
| chr13 | 103990821 | 103990971 |
| chr13 | 103991154 | 103991359 |
| chr13 | 104005486 | 104005663 |
| chr13 | 104015365 | 104015732 |
| chr13 | 104015732 | 104016315 |
| chr13 | 104021099 | 104021359 |
| chr13 | 104023334 | 104023696 |
| chr13 | 104023696 | 104024024 |
| chr13 | 104024857 | 104025008 |
| chr13 | 104029176 | 104029363 |
| chr13 | 104036254 | 104036420 |
| chr13 | 104036523 | 104036827 |
| chr13 | 104037035 | 104037374 |
| chr13 | 104037507 | 104037899 |
| chr13 | 104037899 | 104038171 |
| chr13 | 104041118 | 104041365 |

|       |           |           |
|-------|-----------|-----------|
| chr13 | 104048931 | 104049171 |
| chr13 | 104065651 | 104065989 |
| chr13 | 104065989 | 104066322 |
| chr13 | 104074593 | 104075214 |
| chr13 | 104082070 | 104082817 |
| chr13 | 104082817 | 104083078 |
| chr13 | 104089247 | 104089679 |
| chr13 | 104089679 | 104089967 |
| chr13 | 104094634 | 104095043 |
| chr13 | 104095043 | 104095432 |
| chr13 | 104109008 | 104109333 |
| chr13 | 104109333 | 104109851 |
| chr13 | 104109851 | 104110288 |
| chr13 | 104110327 | 104110789 |
| chr13 | 104139623 | 104139948 |
| chr13 | 104155753 | 104156057 |
| chr13 | 104157458 | 104157737 |
| chr13 | 104177898 | 104178113 |
| chr13 | 104178113 | 104178335 |
| chr13 | 104178335 | 104178645 |
| chr13 | 104178645 | 104178936 |
| chr13 | 104178936 | 104179216 |
| chr13 | 104187467 | 104187641 |
| chr13 | 104207112 | 104207517 |
| chr13 | 104228422 | 104228755 |
| chr13 | 104228755 | 104229227 |
| chr13 | 104229291 | 104229448 |
| chr13 | 104253047 | 104253255 |
| chr13 | 104285051 | 104285242 |
| chr13 | 104285315 | 104285457 |
| chr13 | 104285457 | 104285606 |
| chr13 | 104286034 | 104286233 |
| chr13 | 104286695 | 104287342 |
| chr13 | 104287740 | 104287956 |
| chr13 | 104288143 | 104288483 |
| chr13 | 104288564 | 104288836 |
| chr13 | 104295500 | 104295825 |
| chr13 | 104318176 | 104318377 |
| chr13 | 104323583 | 104323818 |
| chr13 | 104428854 | 104429027 |
| chr13 | 104432778 | 104433257 |
| chr13 | 104433257 | 104433517 |

|       |           |           |
|-------|-----------|-----------|
| chr13 | 104443242 | 104443433 |
| chr13 | 104447651 | 104447822 |
| chr13 | 104448238 | 104448697 |
| chr13 | 104448912 | 104449077 |
| chr13 | 104460286 | 104460892 |
| chr13 | 104467501 | 104468003 |
| chr13 | 104468003 | 104468403 |
| chr13 | 104506036 | 104506567 |
| chr13 | 104507353 | 104507592 |
| chr13 | 104513939 | 104514329 |
| chr13 | 104515158 | 104515363 |
| chr13 | 104517091 | 104517272 |
| chr13 | 104520287 | 104520560 |
| chr13 | 104520560 | 104520929 |
| chr13 | 104521538 | 104522007 |
| chr13 | 104526670 | 104526981 |
| chr13 | 104554916 | 104555118 |
| chr13 | 104562119 | 104562273 |
| chr13 | 104588439 | 104588648 |
| chr13 | 104622216 | 104622797 |
| chr13 | 104630864 | 104631125 |
| chr13 | 104662086 | 104662343 |
| chr13 | 104662425 | 104662883 |
| chr13 | 104662887 | 104663068 |
| chr13 | 104789754 | 104790014 |
| chr13 | 104805786 | 104805938 |
| chr13 | 104816332 | 104816803 |
| chr13 | 104816803 | 104817067 |
| chr13 | 104817067 | 104817532 |
| chr13 | 104846537 | 104846729 |
| chr13 | 104863313 | 104863812 |
| chr13 | 104863812 | 104864218 |
| chr13 | 104869695 | 104869929 |
| chr13 | 104883590 | 104883740 |
| chr13 | 104894840 | 104895086 |
| chr13 | 104910262 | 104910550 |
| chr13 | 104914622 | 104914824 |
| chr13 | 104918823 | 104918986 |
| chr13 | 104924218 | 104924404 |
| chr13 | 104934187 | 104934378 |
| chr13 | 104939111 | 104939676 |
| chr13 | 104939950 | 104940183 |

|       |           |           |
|-------|-----------|-----------|
| chr13 | 104948014 | 104948283 |
| chr13 | 104985743 | 104986032 |
| chr13 | 105022280 | 105022638 |
| chr13 | 105054136 | 105054379 |
| chr13 | 105054379 | 105054602 |
| chr13 | 105054602 | 105054939 |
| chr13 | 105293977 | 105294355 |
| chr13 | 105294355 | 105294548 |
| chr13 | 105377078 | 105377387 |
| chr13 | 105735065 | 105735228 |
| chr13 | 106427268 | 106427500 |
| chr13 | 106551285 | 106551594 |
| chr13 | 106551644 | 106551962 |
| chr13 | 106562670 | 106562933 |
| chr13 | 106584872 | 106585054 |
| chr13 | 106819810 | 106820106 |
| chr13 | 106828058 | 106828208 |
| chr13 | 106830497 | 106830657 |
| chr13 | 106880956 | 106881114 |
| chr13 | 106894378 | 106894583 |
| chr13 | 106936195 | 106936772 |
| chr13 | 106936772 | 106937251 |
| chr13 | 106941650 | 106941834 |
| chr13 | 106946652 | 106946951 |
| chr13 | 106946951 | 106947213 |
| chr13 | 106947213 | 106947525 |
| chr13 | 106960598 | 106960913 |
| chr13 | 106961401 | 106961826 |
| chr13 | 106994655 | 106994857 |
| chr13 | 106994857 | 106995091 |
| chr13 | 106998734 | 106999030 |
| chr13 | 107003127 | 107003643 |
| chr13 | 107015711 | 107015913 |
| chr13 | 107019351 | 107019821 |
| chr13 | 107021466 | 107021704 |
| chr13 | 107021704 | 107021987 |
| chr13 | 107021987 | 107022279 |
| chr13 | 107022279 | 107022750 |
| chr13 | 107022750 | 107023193 |
| chr13 | 107024352 | 107024514 |
| chr13 | 107035365 | 107035542 |
| chr13 | 107036658 | 107037069 |

|       |           |           |
|-------|-----------|-----------|
| chr13 | 107037069 | 107037453 |
| chr13 | 107056405 | 107056591 |
| chr13 | 107063522 | 107063775 |
| chr13 | 107094600 | 107094821 |
| chr13 | 107094939 | 107095317 |
| chr13 | 107095317 | 107095998 |
| chr13 | 107096941 | 107097270 |
| chr13 | 107101662 | 107101917 |
| chr13 | 107113968 | 107114196 |
| chr13 | 107114196 | 107114384 |
| chr13 | 107121637 | 107121820 |
| chr13 | 107130018 | 107130221 |
| chr13 | 107134280 | 107134558 |
| chr13 | 107168589 | 107168953 |
| chr13 | 107168953 | 107169191 |
| chr13 | 107182625 | 107182830 |
| chr13 | 107207957 | 107208208 |
| chr13 | 107325786 | 107325941 |
| chr13 | 107329064 | 107329388 |
| chr13 | 107333645 | 107333860 |
| chr13 | 107371657 | 107372227 |
| chr13 | 107377567 | 107377786 |
| chr13 | 107378201 | 107378363 |
| chr13 | 107461003 | 107461347 |
| chr13 | 107461347 | 107461721 |
| chr13 | 107469617 | 107470105 |
| chr13 | 107485481 | 107486128 |
| chr13 | 107536438 | 107536856 |
| chr13 | 107536970 | 107537282 |
| chr13 | 107537418 | 107537772 |
| chr13 | 107548597 | 107548832 |
| chr13 | 107562481 | 107562889 |
| chr13 | 107574974 | 107575420 |
| chr13 | 107598572 | 107598771 |
| chr13 | 107600672 | 107600904 |
| chr13 | 107607398 | 107607704 |
| chr13 | 107616895 | 107617058 |
| chr13 | 107619557 | 107619799 |
| chr13 | 107668459 | 107668808 |
| chr13 | 107668868 | 107669118 |
| chr13 | 107670971 | 107671144 |
| chr13 | 107676289 | 107676816 |

|       |           |           |
|-------|-----------|-----------|
| chr13 | 107676816 | 107677191 |
| chr13 | 107682517 | 107682904 |
| chr13 | 107698858 | 107699014 |
| chr13 | 107700284 | 107700591 |
| chr13 | 107700659 | 107700954 |
| chr13 | 107711315 | 107711903 |
| chr13 | 107712366 | 107712591 |
| chr13 | 107714049 | 107714460 |
| chr13 | 107718268 | 107718514 |
| chr13 | 107723171 | 107723321 |
| chr13 | 107736679 | 107736898 |
| chr13 | 107743807 | 107744276 |
| chr13 | 107798091 | 107798486 |
| chr13 | 107813536 | 107814295 |
| chr13 | 107814356 | 107814523 |
| chr13 | 107814531 | 107814691 |
| chr13 | 107829992 | 107830153 |
| chr13 | 107831138 | 107831587 |
| chr13 | 107838098 | 107838612 |
| chr13 | 107838920 | 107839070 |
| chr13 | 107844128 | 107844397 |
| chr13 | 107844949 | 107845143 |
| chr13 | 107845494 | 107845754 |
| chr13 | 107845854 | 107846139 |
| chr13 | 107846759 | 107846958 |
| chr13 | 107846996 | 107847202 |
| chr13 | 107847214 | 107847554 |
| chr13 | 107847554 | 107847947 |
| chr13 | 107848148 | 107848336 |
| chr13 | 107854857 | 107855020 |
| chr13 | 107858202 | 107858404 |
| chr13 | 107858404 | 107858711 |
| chr13 | 107858711 | 107859059 |
| chr13 | 107859059 | 107859348 |
| chr13 | 107859348 | 107859764 |
| chr13 | 107859764 | 107860140 |
| chr13 | 107865928 | 107866363 |
| chr13 | 107866392 | 107866675 |
| chr13 | 107866675 | 107866900 |
| chr13 | 107866900 | 107867156 |
| chr13 | 107873121 | 107873759 |
| chr13 | 107888826 | 107889095 |

|       |           |           |
|-------|-----------|-----------|
| chr13 | 107889095 | 107889300 |
| chr13 | 107889300 | 107889501 |
| chr13 | 107889889 | 107890359 |
| chr13 | 107890359 | 107890768 |
| chr13 | 107890768 | 107891151 |
| chr13 | 107891151 | 107891456 |
| chr13 | 107923373 | 107923582 |
| chr13 | 107925463 | 107925892 |
| chr13 | 107933712 | 107934050 |
| chr13 | 107940041 | 107940200 |
| chr13 | 107955812 | 107956067 |
| chr13 | 107961962 | 107962464 |
| chr13 | 107963495 | 107963805 |
| chr13 | 107967982 | 107968356 |
| chr13 | 108015287 | 108015482 |
| chr13 | 108025919 | 108026098 |
| chr13 | 108041522 | 108041773 |
| chr13 | 108043934 | 108044210 |
| chr13 | 108044210 | 108044573 |
| chr13 | 108044573 | 108044937 |
| chr13 | 108046046 | 108046411 |
| chr13 | 108074494 | 108074825 |
| chr13 | 108097085 | 108097384 |
| chr13 | 108098791 | 108099037 |
| chr13 | 108127249 | 108127453 |
| chr13 | 108153056 | 108153300 |
| chr13 | 108158097 | 108158445 |
| chr13 | 108158445 | 108158917 |
| chr13 | 108158917 | 108159249 |
| chr13 | 108188010 | 108188354 |
| chr13 | 108191402 | 108191645 |
| chr13 | 108204967 | 108205127 |
| chr13 | 108206397 | 108206588 |
| chr13 | 108214007 | 108214520 |
| chr13 | 108214520 | 108214797 |
| chr13 | 108214797 | 108215133 |
| chr13 | 108228658 | 108229134 |
| chr13 | 108229134 | 108229629 |
| chr13 | 108229629 | 108229930 |
| chr13 | 108229979 | 108230314 |
| chr13 | 108253915 | 108254386 |
| chr13 | 108263125 | 108263474 |



|       |           |           |
|-------|-----------|-----------|
| chr13 | 108277434 | 108277619 |
| chr13 | 108297307 | 108297623 |
| chr13 | 108297623 | 108297906 |
| chr13 | 108297906 | 108298110 |
| chr13 | 108302957 | 108303306 |
| chr13 | 108303306 | 108303728 |
| chr13 | 108303728 | 108304189 |
| chr13 | 108315818 | 108316544 |
| chr13 | 108316544 | 108316976 |
| chr13 | 108329549 | 108330084 |
| chr13 | 108338074 | 108338336 |
| chr13 | 108338336 | 108338654 |
| chr13 | 108347071 | 108347360 |
| chr13 | 108373321 | 108373472 |
| chr13 | 108390629 | 108390925 |
| chr13 | 108411377 | 108411763 |
| chr13 | 108415540 | 108415790 |
| chr13 | 108480495 | 108480720 |
| chr13 | 108485064 | 108485411 |
| chr13 | 108500485 | 108500641 |
| chr13 | 108553120 | 108553270 |
| chr13 | 108599480 | 108599892 |
| chr13 | 108603465 | 108603920 |
| chr13 | 108628528 | 108629020 |
| chr13 | 108636215 | 108636408 |
| chr13 | 108658092 | 108658452 |
| chr13 | 108677522 | 108677695 |
| chr13 | 108688268 | 108688506 |
| chr13 | 108692947 | 108693511 |
| chr13 | 108693511 | 108693804 |
| chr13 | 108695359 | 108695623 |
| chr13 | 108710829 | 108711051 |
| chr13 | 108713956 | 108714434 |
| chr13 | 108716589 | 108716824 |
| chr13 | 108746678 | 108746919 |
| chr13 | 108751212 | 108751454 |
| chr13 | 108751526 | 108751789 |
| chr13 | 108752015 | 108752165 |
| chr13 | 108752305 | 108752683 |
| chr13 | 108775704 | 108775907 |
| chr13 | 108775909 | 108776207 |
| chr13 | 108812958 | 108813384 |

|       |           |           |
|-------|-----------|-----------|
| chr13 | 108813384 | 108813702 |
| chr13 | 108817818 | 108818108 |
| chr13 | 108819852 | 108820447 |
| chr13 | 108834366 | 108834977 |
| chr13 | 108900242 | 108900452 |
| chr13 | 108964286 | 108964499 |
| chr13 | 109116037 | 109116373 |
| chr13 | 109116373 | 109116746 |
| chr13 | 109116792 | 109117050 |
| chr13 | 109158841 | 109158991 |
| chr13 | 109166359 | 109166577 |
| chr13 | 109170655 | 109170868 |
| chr13 | 109175329 | 109175656 |
| chr13 | 109204752 | 109204957 |
| chr13 | 109209651 | 109209921 |
| chr13 | 109210494 | 109210716 |
| chr13 | 109211531 | 109211779 |
| chr13 | 109211826 | 109211992 |
| chr13 | 109212000 | 109212417 |
| chr13 | 109212417 | 109212629 |
| chr13 | 109212673 | 109212832 |
| chr13 | 109213140 | 109213290 |
| chr13 | 109213312 | 109213478 |
| chr13 | 109229313 | 109229575 |
| chr13 | 109229575 | 109229837 |
| chr13 | 109229837 | 109230138 |
| chr13 | 109230138 | 109230485 |
| chr13 | 109230485 | 109230773 |
| chr13 | 109230773 | 109230996 |
| chr13 | 109236000 | 109236633 |
| chr13 | 109242429 | 109243042 |
| chr13 | 109243116 | 109243556 |
| chr13 | 109243721 | 109243968 |
| chr13 | 109260170 | 109260714 |
| chr13 | 109260714 | 109261023 |
| chr13 | 109261023 | 109261222 |
| chr13 | 109261222 | 109261458 |
| chr13 | 109261964 | 109262200 |
| chr13 | 109265287 | 109265492 |
| chr13 | 109268293 | 109268629 |
| chr13 | 109268917 | 109269313 |
| chr13 | 109278769 | 109278919 |

|       |           |           |
|-------|-----------|-----------|
| chr13 | 109279048 | 109279737 |
| chr13 | 109305123 | 109305284 |
| chr13 | 109315510 | 109315888 |
| chr13 | 109315888 | 109316172 |
| chr13 | 109317303 | 109317459 |
| chr13 | 109318505 | 109319022 |
| chr13 | 109319038 | 109319235 |
| chr13 | 109343659 | 109343950 |
| chr13 | 109348901 | 109349125 |
| chr13 | 109357807 | 109357992 |
| chr13 | 109360037 | 109360379 |
| chr13 | 109384080 | 109384241 |
| chr13 | 109408374 | 109408618 |
| chr13 | 109440370 | 109440799 |
| chr13 | 109440799 | 109441287 |
| chr13 | 109441505 | 109441674 |
| chr13 | 109481355 | 109482020 |
| chr13 | 109486837 | 109487156 |
| chr13 | 109487325 | 109487776 |
| chr13 | 109502760 | 109503354 |
| chr13 | 109508551 | 109508772 |
| chr13 | 109510799 | 109511092 |
| chr13 | 109536554 | 109536976 |
| chr13 | 109539815 | 109540043 |
| chr13 | 109547775 | 109548090 |
| chr13 | 109554430 | 109554635 |
| chr13 | 109555274 | 109555556 |
| chr13 | 109555556 | 109555889 |
| chr13 | 109558363 | 109558525 |
| chr13 | 109590111 | 109590310 |
| chr13 | 109609876 | 109610126 |
| chr13 | 109616011 | 109616241 |
| chr13 | 109623266 | 109623416 |
| chr13 | 109631140 | 109631394 |
| chr13 | 109632527 | 109632844 |
| chr13 | 109633202 | 109633646 |
| chr13 | 109643383 | 109643737 |
| chr13 | 109647868 | 109648178 |
| chr13 | 109648178 | 109648520 |
| chr13 | 109651742 | 109652159 |
| chr13 | 109652217 | 109652396 |
| chr13 | 109658687 | 109658968 |

|       |           |           |
|-------|-----------|-----------|
| chr13 | 109658981 | 109659472 |
| chr13 | 109659607 | 109659801 |
| chr13 | 109669601 | 109669849 |
| chr13 | 109669962 | 109670380 |
| chr13 | 109683065 | 109683226 |
| chr13 | 109685293 | 109685855 |
| chr13 | 109685855 | 109686135 |
| chr13 | 109686135 | 109686467 |
| chr13 | 109693037 | 109693227 |
| chr13 | 109693697 | 109694163 |
| chr13 | 109694163 | 109694588 |
| chr13 | 109703523 | 109703764 |
| chr13 | 109710730 | 109710910 |
| chr13 | 109732519 | 109732744 |
| chr13 | 109736397 | 109736547 |
| chr13 | 109754971 | 109755228 |
| chr13 | 109759286 | 109759493 |
| chr13 | 109759873 | 109760158 |
| chr13 | 109775938 | 109776481 |
| chr13 | 109789183 | 109789568 |
| chr13 | 109802263 | 109802537 |
| chr13 | 109806659 | 109806826 |
| chr13 | 109819068 | 109819404 |
| chr13 | 109822152 | 109822426 |
| chr13 | 109822426 | 109822926 |
| chr13 | 109839320 | 109839581 |
| chr13 | 109840335 | 109840707 |
| chr13 | 109841220 | 109841494 |
| chr13 | 109841494 | 109841703 |
| chr13 | 109842977 | 109843400 |
| chr13 | 109874843 | 109875086 |
| chr13 | 109881069 | 109881552 |
| chr13 | 109881552 | 109881868 |
| chr13 | 109897887 | 109898253 |
| chr13 | 109899796 | 109900024 |
| chr13 | 109900162 | 109900463 |
| chr13 | 109902451 | 109902803 |
| chr13 | 109902803 | 109903120 |
| chr13 | 109903120 | 109903531 |
| chr13 | 109907700 | 109907904 |
| chr13 | 109917428 | 109917733 |
| chr13 | 109922311 | 109922556 |

|       |           |           |
|-------|-----------|-----------|
| chr13 | 110018410 | 110018658 |
| chr13 | 110018658 | 110018881 |
| chr13 | 110019536 | 110019710 |
| chr13 | 110023173 | 110023349 |
| chr13 | 110040224 | 110040398 |
| chr13 | 110062209 | 110062626 |
| chr13 | 110062794 | 110063045 |
| chr13 | 110211766 | 110212023 |
| chr13 | 110218577 | 110218937 |
| chr13 | 110229823 | 110230072 |
| chr13 | 110230072 | 110230636 |
| chr13 | 110237673 | 110237907 |
| chr13 | 110280027 | 110280275 |
| chr13 | 110283902 | 110284107 |
| chr13 | 110333748 | 110333927 |
| chr13 | 110368679 | 110369021 |
| chr13 | 110380460 | 110380711 |
| chr13 | 110382618 | 110382852 |
| chr13 | 110394273 | 110394600 |
| chr13 | 110394600 | 110394834 |
| chr13 | 110394834 | 110395013 |
| chr13 | 110395013 | 110395282 |
| chr13 | 110395282 | 110395609 |
| chr13 | 110401177 | 110401327 |
| chr13 | 110401482 | 110401666 |
| chr13 | 110401666 | 110401855 |
| chr13 | 110401947 | 110402235 |
| chr13 | 110402742 | 110403100 |
| chr13 | 110403151 | 110403319 |
| chr13 | 110403319 | 110403511 |
| chr13 | 110403587 | 110403761 |
| chr13 | 110403761 | 110403979 |
| chr13 | 110404068 | 110404394 |
| chr13 | 110406247 | 110406579 |
| chr13 | 110409957 | 110410252 |
| chr13 | 110410354 | 110410699 |
| chr13 | 110412892 | 110413146 |
| chr13 | 110418694 | 110418994 |
| chr13 | 110419569 | 110419998 |
| chr13 | 110428655 | 110429211 |
| chr13 | 110435737 | 110435954 |
| chr13 | 110435977 | 110436473 |

|       |           |           |
|-------|-----------|-----------|
| chr13 | 110436625 | 110437131 |
| chr13 | 110444918 | 110445187 |
| chr13 | 110459936 | 110460349 |
| chr13 | 110466512 | 110466832 |
| chr13 | 110469123 | 110469277 |
| chr13 | 110470825 | 110471142 |
| chr13 | 110490142 | 110490686 |
| chr13 | 110490796 | 110491056 |
| chr13 | 110492690 | 110492987 |
| chr13 | 110502887 | 110503101 |
| chr13 | 110506352 | 110506588 |
| chr13 | 110507784 | 110508250 |
| chr13 | 110540611 | 110540902 |
| chr13 | 110541602 | 110541851 |
| chr13 | 110541851 | 110542072 |
| chr13 | 110545332 | 110545897 |
| chr13 | 110550160 | 110550459 |
| chr13 | 110561890 | 110562085 |
| chr13 | 110562827 | 110563357 |
| chr13 | 110600063 | 110600269 |
| chr13 | 110600413 | 110600681 |
| chr13 | 110601344 | 110601699 |
| chr13 | 110601703 | 110601929 |
| chr13 | 110602987 | 110603179 |
| chr13 | 110609354 | 110609532 |
| chr13 | 110609554 | 110609712 |
| chr13 | 110633088 | 110633847 |
| chr13 | 110643481 | 110644139 |
| chr13 | 110656900 | 110657246 |
| chr13 | 110672723 | 110672909 |
| chr13 | 110678528 | 110678808 |
| chr13 | 110679815 | 110680181 |
| chr13 | 110680765 | 110681032 |
| chr13 | 110700205 | 110700583 |
| chr13 | 110720282 | 110720757 |
| chr13 | 110724061 | 110724595 |
| chr13 | 110724617 | 110724938 |
| chr13 | 110725847 | 110726209 |
| chr13 | 110735348 | 110735557 |
| chr13 | 110735599 | 110736016 |
| chr13 | 110739152 | 110739400 |
| chr13 | 110741058 | 110741377 |

|       |           |           |
|-------|-----------|-----------|
| chr13 | 110741582 | 110741894 |
| chr13 | 110743899 | 110744305 |
| chr13 | 110744305 | 110744615 |
| chr13 | 110748668 | 110749014 |
| chr13 | 110749014 | 110749376 |
| chr13 | 110755063 | 110755408 |
| chr13 | 110756945 | 110757159 |
| chr13 | 110768666 | 110768855 |
| chr13 | 110769245 | 110769542 |
| chr13 | 110771271 | 110771442 |
| chr13 | 110780795 | 110780994 |
| chr13 | 110798389 | 110798544 |
| chr13 | 110804621 | 110804921 |
| chr13 | 110817108 | 110817506 |
| chr13 | 110824852 | 110825312 |
| chr13 | 110827914 | 110828183 |
| chr13 | 110854269 | 110854544 |
| chr13 | 110859138 | 110859564 |
| chr13 | 110874383 | 110874628 |
| chr13 | 110877216 | 110877422 |
| chr13 | 110877873 | 110878055 |
| chr13 | 110878123 | 110878375 |
| chr13 | 110882680 | 110883340 |
| chr13 | 110896613 | 110897186 |
| chr13 | 110903335 | 110903569 |
| chr13 | 110907655 | 110908068 |
| chr13 | 110911246 | 110911593 |
| chr13 | 110911865 | 110912257 |
| chr13 | 110913654 | 110914127 |
| chr13 | 110917566 | 110917786 |
| chr13 | 110924991 | 110925301 |
| chr13 | 110925301 | 110925613 |
| chr13 | 110929539 | 110929977 |
| chr13 | 110941603 | 110941970 |
| chr13 | 110941970 | 110942212 |
| chr13 | 110943020 | 110943213 |
| chr13 | 110943213 | 110943416 |
| chr13 | 110967052 | 110967592 |
| chr13 | 110967592 | 110968065 |
| chr13 | 110968113 | 110968429 |
| chr13 | 110972176 | 110972454 |
| chr13 | 111031722 | 111032037 |

|       |           |           |
|-------|-----------|-----------|
| chr13 | 111050165 | 111050610 |
| chr13 | 111068992 | 111069147 |
| chr13 | 111092071 | 111092345 |
| chr13 | 111095514 | 111095764 |
| chr13 | 111099261 | 111099583 |
| chr13 | 111099955 | 111100119 |
| chr13 | 111100496 | 111100844 |
| chr13 | 111116490 | 111116722 |
| chr13 | 111160287 | 111160489 |
| chr13 | 111233261 | 111233731 |
| chr13 | 111237941 | 111238207 |
| chr13 | 111256195 | 111256528 |
| chr13 | 111258199 | 111258560 |
| chr13 | 111294729 | 111295060 |
| chr13 | 111295060 | 111295507 |
| chr13 | 111295952 | 111296241 |
| chr13 | 111345317 | 111345779 |
| chr13 | 111345798 | 111346409 |
| chr13 | 111411052 | 111411214 |
| chr13 | 111418128 | 111418443 |
| chr13 | 111461467 | 111461709 |
| chr13 | 111489363 | 111489779 |
| chr13 | 111489779 | 111490177 |
| chr13 | 111490177 | 111490467 |
| chr13 | 111490467 | 111490774 |
| chr13 | 111542187 | 111542469 |
| chr13 | 111542469 | 111542703 |
| chr13 | 111545325 | 111545652 |
| chr13 | 111548366 | 111548579 |
| chr13 | 111570091 | 111570242 |
| chr13 | 111601496 | 111601651 |
| chr13 | 111623125 | 111623423 |
| chr13 | 111685727 | 111686095 |
| chr13 | 111686095 | 111686397 |
| chr13 | 111686397 | 111686672 |
| chr13 | 111686672 | 111686946 |
| chr13 | 111686946 | 111687230 |
| chr13 | 111687230 | 111687524 |
| chr13 | 111687524 | 111687828 |
| chr13 | 111725024 | 111725398 |
| chr13 | 111725398 | 111725680 |
| chr13 | 111725680 | 111725918 |



|       |           |           |
|-------|-----------|-----------|
| chr13 | 111725918 | 111726140 |
| chr13 | 111744422 | 111744705 |
| chr13 | 111744705 | 111745058 |
| chr13 | 111771283 | 111771600 |
| chr13 | 111772111 | 111772539 |
| chr13 | 111788186 | 111788445 |
| chr13 | 111788445 | 111788807 |
| chr13 | 111789198 | 111789438 |
| chr13 | 111796663 | 111796853 |
| chr13 | 111797044 | 111797362 |
| chr13 | 111797583 | 111797924 |
| chr13 | 111797924 | 111798325 |
| chr13 | 111802942 | 111803230 |
| chr13 | 111807729 | 111807986 |
| chr13 | 111807986 | 111808259 |
| chr13 | 111808288 | 111808629 |
| chr13 | 111808629 | 111808977 |
| chr13 | 111808977 | 111809446 |
| chr13 | 111809446 | 111809944 |
| chr13 | 111826676 | 111826852 |
| chr13 | 111850519 | 111850780 |
| chr13 | 111856031 | 111856210 |
| chr13 | 111862425 | 111862660 |
| chr13 | 111919490 | 111919697 |
| chr13 | 111941264 | 111941498 |
| chr13 | 111952091 | 111952247 |
| chr13 | 111966126 | 111966572 |
| chr13 | 111966572 | 111966867 |
| chr13 | 111967553 | 111967824 |
| chr13 | 111967824 | 111968055 |
| chr13 | 111984642 | 111984802 |
| chr13 | 111986715 | 111987023 |
| chr13 | 111999704 | 112000075 |
| chr13 | 112001061 | 112001297 |
| chr13 | 112001297 | 112001574 |
| chr13 | 112002673 | 112003011 |
| chr13 | 112003011 | 112003472 |
| chr13 | 112018606 | 112018955 |
| chr13 | 112018955 | 112019280 |
| chr13 | 112024915 | 112025254 |
| chr13 | 112030673 | 112031397 |
| chr13 | 112043628 | 112043857 |

|       |           |           |
|-------|-----------|-----------|
| chr13 | 112052123 | 112052328 |
| chr13 | 112052721 | 112052926 |
| chr13 | 112054565 | 112054728 |
| chr13 | 112054776 | 112055378 |
| chr13 | 112062059 | 112062512 |
| chr13 | 112063504 | 112064255 |
| chr13 | 112071180 | 112071693 |
| chr13 | 112071997 | 112072250 |
| chr13 | 112076251 | 112076406 |
| chr13 | 112100654 | 112100995 |
| chr13 | 112110112 | 112110465 |
| chr13 | 112144919 | 112145305 |
| chr13 | 112145473 | 112145729 |
| chr13 | 112150718 | 112151080 |
| chr13 | 112152981 | 112153407 |
| chr13 | 112185217 | 112185389 |
| chr13 | 112188305 | 112188713 |
| chr13 | 112222406 | 112222818 |
| chr13 | 112251532 | 112251818 |
| chr13 | 112252125 | 112252346 |
| chr13 | 112253954 | 112254315 |
| chr13 | 112254315 | 112254676 |
| chr13 | 112258495 | 112258877 |
| chr13 | 112259477 | 112259747 |
| chr13 | 112264754 | 112264982 |
| chr13 | 112271953 | 112272223 |
| chr13 | 112286811 | 112287168 |
| chr13 | 112287168 | 112287530 |
| chr13 | 112308721 | 112308937 |
| chr13 | 112311670 | 112311958 |
| chr13 | 112316729 | 112316949 |
| chr13 | 112317145 | 112317371 |
| chr13 | 112318102 | 112318527 |
| chr13 | 112318527 | 112318792 |
| chr13 | 112326255 | 112326480 |
| chr13 | 112326480 | 112326738 |
| chr13 | 112340800 | 112341084 |
| chr13 | 112343131 | 112343288 |
| chr13 | 112343496 | 112343974 |
| chr13 | 112349198 | 112349391 |
| chr13 | 112363190 | 112363630 |
| chr13 | 112365760 | 112366121 |

|       |           |           |
|-------|-----------|-----------|
| chr13 | 112371189 | 112371537 |
| chr13 | 112375867 | 112376067 |
| chr13 | 112379308 | 112379590 |
| chr13 | 112379590 | 112379856 |
| chr13 | 112379856 | 112380215 |
| chr13 | 112380215 | 112380517 |
| chr13 | 112380517 | 112380726 |
| chr13 | 112389860 | 112390082 |
| chr13 | 112390260 | 112390653 |
| chr13 | 112390912 | 112391138 |
| chr13 | 112391184 | 112391435 |
| chr13 | 112391435 | 112391704 |
| chr13 | 112425181 | 112425406 |
| chr13 | 112425406 | 112425646 |
| chr13 | 112430521 | 112430715 |
| chr13 | 112430715 | 112430939 |
| chr13 | 112430939 | 112431339 |
| chr13 | 112431339 | 112431711 |
| chr13 | 112431711 | 112432007 |
| chr13 | 112432007 | 112432319 |
| chr13 | 112440083 | 112440276 |
| chr13 | 112447236 | 112447439 |
| chr13 | 112454159 | 112454331 |
| chr13 | 112461214 | 112461571 |
| chr13 | 112463573 | 112463873 |
| chr13 | 112463873 | 112464210 |
| chr13 | 112464210 | 112464628 |
| chr13 | 112509546 | 112509828 |
| chr13 | 112517283 | 112517530 |
| chr13 | 112529926 | 112530345 |
| chr13 | 112541887 | 112542041 |
| chr13 | 112551718 | 112551926 |
| chr13 | 112556648 | 112556923 |
| chr13 | 112578106 | 112578400 |
| chr13 | 112593861 | 112594060 |
| chr13 | 112594933 | 112595156 |
| chr13 | 112619745 | 112620072 |
| chr13 | 112645635 | 112645785 |
| chr13 | 112660321 | 112660555 |
| chr13 | 112660555 | 112660836 |
| chr13 | 112660836 | 112661124 |
| chr13 | 112661124 | 112661413 |

|       |           |           |
|-------|-----------|-----------|
| chr13 | 112672870 | 112673021 |
| chr13 | 112674066 | 112674395 |
| chr13 | 112678243 | 112678459 |
| chr13 | 112683417 | 112683714 |
| chr13 | 112683717 | 112683878 |
| chr13 | 112706259 | 112706796 |
| chr13 | 112711707 | 112712167 |
| chr13 | 112712167 | 112712500 |
| chr13 | 112724955 | 112725155 |
| chr13 | 112725155 | 112725405 |
| chr13 | 112726028 | 112726402 |
| chr13 | 112739834 | 112739986 |
| chr13 | 112740184 | 112740566 |
| chr13 | 112744394 | 112744642 |
| chr13 | 112754988 | 112755361 |
| chr13 | 112762739 | 112762986 |
| chr13 | 112763405 | 112763565 |
| chr13 | 112768863 | 112769013 |
| chr13 | 112770380 | 112770798 |
| chr13 | 112770798 | 112771251 |
| chr13 | 112771251 | 112771646 |
| chr13 | 112772910 | 112773215 |
| chr13 | 112774128 | 112774356 |
| chr13 | 112787202 | 112787438 |
| chr13 | 112800564 | 112800992 |
| chr13 | 112800992 | 112801339 |
| chr13 | 112801339 | 112801674 |
| chr13 | 112803544 | 112803694 |
| chr13 | 112803728 | 112803984 |
| chr13 | 112810333 | 112810726 |
| chr13 | 112810726 | 112811300 |
| chr13 | 112811606 | 112811766 |
| chr13 | 112822442 | 112822924 |
| chr13 | 112861724 | 112862130 |
| chr13 | 112862130 | 112862374 |
| chr13 | 112862374 | 112862627 |
| chr13 | 112863229 | 112863446 |
| chr13 | 112909762 | 112909968 |
| chr13 | 112926864 | 112927076 |
| chr13 | 112927288 | 112927775 |
| chr13 | 112927775 | 112928152 |
| chr13 | 112987371 | 112987945 |

|       |           |           |
|-------|-----------|-----------|
| chr13 | 112987945 | 112988230 |
| chr13 | 112988230 | 112988431 |
| chr13 | 112993499 | 112993875 |
| chr13 | 112993875 | 112994082 |
| chr13 | 112994082 | 112994288 |
| chr13 | 112994288 | 112994547 |
| chr13 | 112996500 | 112996663 |
| chr13 | 112998451 | 112998661 |
| chr13 | 112998661 | 112998907 |
| chr13 | 112998907 | 112999269 |
| chr13 | 113000678 | 113000865 |
| chr13 | 113013189 | 113013339 |
| chr13 | 113013590 | 113013799 |
| chr13 | 113023482 | 113024011 |
| chr13 | 113033890 | 113034248 |
| chr13 | 113034303 | 113034508 |
| chr13 | 113034938 | 113035234 |
| chr13 | 113035234 | 113035463 |
| chr13 | 113035891 | 113036242 |
| chr13 | 113046298 | 113046560 |
| chr13 | 113046560 | 113046842 |
| chr13 | 113047744 | 113047894 |
| chr13 | 113048503 | 113048717 |
| chr13 | 113049416 | 113049912 |
| chr13 | 113056743 | 113057008 |
| chr13 | 113119040 | 113119190 |
| chr13 | 113120780 | 113120948 |
| chr13 | 113129599 | 113129808 |
| chr13 | 113168295 | 113168512 |
| chr13 | 113168512 | 113168754 |
| chr13 | 113170255 | 113170787 |
| chr13 | 113183264 | 113183721 |
| chr13 | 113202147 | 113202489 |
| chr13 | 113202489 | 113202770 |
| chr13 | 113203017 | 113203451 |
| chr13 | 113218860 | 113219054 |
| chr13 | 113223961 | 113224572 |
| chr13 | 113225747 | 113226434 |
| chr13 | 113227215 | 113227404 |
| chr13 | 113229527 | 113229797 |
| chr13 | 113252713 | 113252951 |
| chr13 | 113256815 | 113257121 |

|       |           |           |
|-------|-----------|-----------|
| chr13 | 113259326 | 113259476 |
| chr13 | 113262856 | 113263318 |
| chr13 | 113263676 | 113263907 |
| chr13 | 113265322 | 113265539 |
| chr13 | 113266506 | 113266662 |
| chr13 | 113266686 | 113266943 |
| chr13 | 113268631 | 113268786 |
| chr13 | 113269847 | 113270295 |
| chr13 | 113270763 | 113271125 |
| chr13 | 113287942 | 113288113 |
| chr13 | 113288888 | 113289055 |
| chr13 | 113293008 | 113293297 |
| chr13 | 113293297 | 113293591 |
| chr13 | 113322024 | 113322280 |
| chr13 | 113337328 | 113337489 |
| chr13 | 113340679 | 113340995 |
| chr13 | 113341242 | 113341432 |
| chr13 | 113344687 | 113344838 |
| chr13 | 113350819 | 113351102 |
| chr13 | 113351102 | 113351312 |
| chr13 | 113353953 | 113354414 |
| chr13 | 113355019 | 113355253 |
| chr13 | 113403721 | 113404134 |
| chr13 | 113414064 | 113414364 |
| chr13 | 113417525 | 113417709 |
| chr13 | 113418195 | 113418412 |
| chr13 | 113443147 | 113443328 |
| chr13 | 113448466 | 113448647 |
| chr13 | 113454457 | 113455044 |
| chr13 | 113465254 | 113465420 |
| chr13 | 113466564 | 113466817 |
| chr13 | 113466817 | 113467036 |
| chr13 | 113483995 | 113484194 |
| chr13 | 113484194 | 113484422 |
| chr13 | 113485634 | 113485861 |
| chr13 | 113487254 | 113487425 |
| chr13 | 113490082 | 113490379 |
| chr13 | 113490379 | 113490756 |
| chr13 | 113495546 | 113495893 |
| chr13 | 113495893 | 113496370 |
| chr13 | 113502067 | 113502866 |
| chr13 | 113507498 | 113507734 |

|       |           |           |
|-------|-----------|-----------|
| chr13 | 113509332 | 113509754 |
| chr13 | 113509754 | 113510058 |
| chr13 | 113517862 | 113518487 |
| chr13 | 113550842 | 113551406 |
| chr13 | 113553622 | 113554018 |
| chr13 | 113573433 | 113573591 |
| chr13 | 113574297 | 113574539 |
| chr13 | 113580039 | 113580339 |
| chr13 | 113582530 | 113582774 |
| chr13 | 113582774 | 113582986 |
| chr13 | 113583221 | 113583371 |
| chr13 | 113597270 | 113597505 |
| chr13 | 113601095 | 113601423 |
| chr13 | 113602828 | 113603424 |
| chr13 | 113603642 | 113603877 |
| chr13 | 113603877 | 113604166 |
| chr13 | 113606236 | 113606465 |
| chr13 | 113614717 | 113614922 |
| chr13 | 113615026 | 113615334 |
| chr13 | 113615805 | 113615973 |
| chr13 | 113616252 | 113616507 |
| chr13 | 113616782 | 113616960 |
| chr13 | 113617831 | 113618205 |
| chr13 | 113618205 | 113618433 |
| chr13 | 113618433 | 113618822 |
| chr13 | 113622457 | 113622749 |
| chr13 | 113622922 | 113623171 |
| chr13 | 113634828 | 113635032 |
| chr13 | 113645014 | 113645256 |
| chr13 | 113688262 | 113688440 |
| chr13 | 113693467 | 113693695 |
| chr13 | 113725554 | 113725735 |
| chr13 | 113774866 | 113775088 |
| chr13 | 113793950 | 113794302 |
| chr13 | 113794302 | 113794609 |
| chr13 | 113794609 | 113794824 |
| chr13 | 113794824 | 113795041 |
| chr13 | 113795041 | 113795305 |
| chr13 | 113806528 | 113806678 |
| chr13 | 113806750 | 113806915 |
| chr13 | 113806915 | 113807074 |
| chr13 | 113829127 | 113829398 |

|       |           |           |
|-------|-----------|-----------|
| chr13 | 113842419 | 113842713 |
| chr13 | 113864996 | 113865222 |
| chr13 | 113865960 | 113866113 |
| chr13 | 113867360 | 113868051 |
| chr13 | 113869284 | 113869481 |
| chr13 | 113877506 | 113877730 |
| chr13 | 113918801 | 113918952 |
| chr13 | 113933259 | 113933550 |
| chr13 | 113972312 | 113972838 |
| chr13 | 113983803 | 113984040 |
| chr13 | 113984602 | 113984837 |
| chr13 | 113999626 | 113999917 |
| chr13 | 114001605 | 114001937 |
| chr13 | 114003198 | 114003376 |
| chr13 | 114003526 | 114003834 |
| chr13 | 114076118 | 114076316 |
| chr13 | 114086357 | 114086800 |
| chr13 | 114092444 | 114092817 |
| chr13 | 114103080 | 114103473 |
| chr13 | 114103473 | 114103764 |
| chr13 | 114109560 | 114109752 |
| chr13 | 114113597 | 114113855 |
| chr13 | 114113855 | 114114113 |
| chr13 | 114203207 | 114203614 |
| chr13 | 114254724 | 114255113 |
| chr13 | 114260541 | 114260776 |
| chr13 | 114260776 | 114261002 |
| chr13 | 114261002 | 114261252 |
| chr13 | 114304737 | 114304921 |
| chr13 | 114319181 | 114319577 |
| chr13 | 114360554 | 114360948 |
| chr13 | 114360948 | 114361296 |
| chr13 | 114362139 | 114362494 |
| chr13 | 114379378 | 114379562 |
| chr13 | 114387177 | 114387529 |
| chr13 | 114387551 | 114387887 |
| chr13 | 114387887 | 114388225 |
| chr13 | 114393684 | 114393995 |
| chr13 | 114405890 | 114406177 |
| chr13 | 114420055 | 114420909 |
| chr13 | 114447268 | 114447561 |
| chr13 | 114457316 | 114457540 |



|       |           |           |
|-------|-----------|-----------|
| chr13 | 114458398 | 114458781 |
| chr13 | 114458975 | 114459393 |
| chr13 | 114459438 | 114459674 |
| chr13 | 114460327 | 114460582 |
| chr13 | 114460666 | 114460931 |
| chr13 | 114462579 | 114463211 |
| chr13 | 114490537 | 114490738 |
| chr13 | 114493707 | 114493929 |
| chr13 | 114493929 | 114494172 |
| chr13 | 114494172 | 114494411 |
| chr13 | 114494438 | 114494653 |
| chr13 | 114500885 | 114501365 |
| chr13 | 114513108 | 114513382 |
| chr13 | 114529380 | 114529548 |
| chr13 | 114578280 | 114578468 |
| chr13 | 114584368 | 114585073 |
| chr13 | 114592808 | 114593120 |
| chr13 | 114599677 | 114600061 |
| chr13 | 114607529 | 114607779 |
| chr13 | 114618456 | 114618742 |
| chr13 | 114619079 | 114619546 |
| chr13 | 114626215 | 114626376 |
| chr13 | 114632300 | 114632603 |
| chr13 | 114635783 | 114636179 |
| chr13 | 114638746 | 114639147 |
| chr13 | 114639147 | 114639400 |
| chr13 | 114639572 | 114639792 |
| chr13 | 114639816 | 114640200 |
| chr13 | 114654111 | 114654885 |
| chr13 | 114655009 | 114655257 |
| chr13 | 114661337 | 114661734 |
| chr13 | 114668803 | 114669030 |
| chr13 | 114678859 | 114679101 |
| chr13 | 114679101 | 114679328 |
| chr13 | 114679823 | 114680012 |
| chr13 | 114680068 | 114680370 |
| chr13 | 114680370 | 114680786 |
| chr13 | 114698791 | 114699517 |
| chr13 | 114699573 | 114699802 |
| chr13 | 114702193 | 114702390 |
| chr13 | 114722052 | 114722258 |
| chr13 | 114726349 | 114726586 |

|       |           |           |
|-------|-----------|-----------|
| chr13 | 114726831 | 114727220 |
| chr13 | 114727220 | 114727595 |
| chr13 | 114735027 | 114735496 |
| chr13 | 114735638 | 114735811 |
| chr13 | 114735892 | 114736104 |
| chr13 | 114736104 | 114736605 |
| chr13 | 114742565 | 114742948 |
| chr13 | 114757536 | 114757789 |
| chr13 | 114781841 | 114782093 |
| chr13 | 114793346 | 114793603 |
| chr13 | 114795573 | 114795985 |
| chr13 | 114801281 | 114801525 |
| chr13 | 114809674 | 114809937 |
| chr13 | 114809937 | 114810241 |
| chr13 | 114817697 | 114818114 |
| chr13 | 114818114 | 114818440 |
| chr13 | 114818552 | 114818764 |
| chr13 | 114818764 | 114818972 |
| chr13 | 114824131 | 114824340 |
| chr13 | 114827045 | 114827257 |
| chr13 | 114827398 | 114827722 |
| chr13 | 114827756 | 114827968 |
| chr13 | 114828448 | 114828614 |
| chr13 | 114830394 | 114830576 |
| chr13 | 114830643 | 114830805 |
| chr13 | 114830999 | 114831293 |
| chr13 | 114831315 | 114831537 |
| chr13 | 114831537 | 114831774 |
| chr13 | 114836555 | 114836705 |
| chr13 | 114841623 | 114841797 |
| chr13 | 114841797 | 114842015 |
| chr13 | 114844639 | 114844914 |
| chr13 | 114848443 | 114848744 |
| chr13 | 114849035 | 114849233 |
| chr13 | 114852300 | 114852579 |
| chr13 | 114852579 | 114852830 |
| chr13 | 114852830 | 114853112 |
| chr13 | 114853170 | 114853545 |
| chr13 | 114859991 | 114860246 |
| chr13 | 114860256 | 114860755 |
| chr13 | 114865225 | 114865422 |
| chr13 | 114876089 | 114876350 |

|       |           |           |
|-------|-----------|-----------|
| chr13 | 114876365 | 114876644 |
| chr13 | 114886540 | 114886788 |
| chr13 | 114886788 | 114887029 |
| chr13 | 114887161 | 114887311 |
| chr13 | 114890877 | 114891181 |
| chr13 | 114891639 | 114892057 |
| chr13 | 114895852 | 114896269 |
| chr13 | 114896892 | 114897062 |
| chr13 | 114904085 | 114904322 |
| chr13 | 114909657 | 114909829 |
| chr13 | 114914628 | 114914943 |
| chr13 | 114914943 | 114915289 |
| chr13 | 114915289 | 114915552 |
| chr13 | 114915799 | 114915954 |
| chr13 | 114916363 | 114916576 |
| chr13 | 114918071 | 114918347 |
| chr13 | 114918389 | 114918660 |
| chr13 | 114923367 | 114923678 |
| chr13 | 114924919 | 114925084 |
| chr13 | 114926643 | 114926885 |
| chr13 | 114931706 | 114932038 |
| chr13 | 114932038 | 114932486 |
| chr13 | 114933365 | 114933951 |
| chr13 | 114933951 | 114934183 |
| chr13 | 114935497 | 114935885 |
| chr13 | 114944764 | 114944973 |
| chr13 | 114945331 | 114945857 |
| chr13 | 114945857 | 114946495 |
| chr13 | 114949159 | 114949309 |
| chr13 | 114963930 | 114964088 |
| chr13 | 114964177 | 114964618 |
| chr13 | 114968151 | 114968316 |
| chr13 | 114984722 | 114984884 |
| chr13 | 114985169 | 114985434 |
| chr13 | 115005396 | 115005800 |
| chr13 | 115006242 | 115006392 |
| chr13 | 115033191 | 115033466 |
| chr13 | 115064289 | 115064498 |
| chr13 | 115077837 | 115078137 |
| chr13 | 115089289 | 115089651 |
| chr13 | 115089651 | 115090030 |
| chr13 | 115090030 | 115090402 |

|       |           |           |
|-------|-----------|-----------|
| chr13 | 115090402 | 115090662 |
| chr13 | 115090662 | 115090912 |
| chr13 | 115101323 | 115101832 |
| chr13 | 115101832 | 115102259 |
| chr13 | 115107503 | 115107788 |
| chr13 | 115230551 | 115230780 |
| chr13 | 115345566 | 115345721 |
| chr13 | 115346247 | 115346397 |
| chr13 | 115423792 | 115424209 |
| chr13 | 115491500 | 115491688 |
| chr13 | 115556097 | 115556261 |
| chr13 | 115567405 | 115567641 |
| chr13 | 115571999 | 115572484 |
| chr13 | 115606502 | 115606739 |
| chr13 | 115742180 | 115742402 |
| chr13 | 115757861 | 115758232 |
| chr13 | 115814242 | 115814610 |
| chr13 | 115890342 | 115890561 |
| chr13 | 115986345 | 115986576 |
| chr13 | 115987069 | 115987257 |
| chr13 | 115988157 | 115988346 |
| chr13 | 115989120 | 115989447 |
| chr13 | 115990576 | 115990963 |
| chr13 | 116003802 | 116004026 |
| chr13 | 116017955 | 116018174 |
| chr13 | 116030252 | 116030414 |
| chr13 | 116152723 | 116153007 |
| chr13 | 116166716 | 116166885 |
| chr13 | 116192826 | 116193060 |
| chr13 | 116309547 | 116310054 |
| chr13 | 116310095 | 116310278 |
| chr13 | 116410735 | 116411101 |
| chr13 | 116443253 | 116443478 |
| chr13 | 116509144 | 116509393 |
| chr13 | 116526939 | 116527140 |
| chr13 | 116527140 | 116527626 |
| chr13 | 116535257 | 116535497 |
| chr13 | 116535592 | 116535855 |
| chr13 | 116596469 | 116596625 |
| chr13 | 116712302 | 116712639 |
| chr13 | 116788468 | 116788788 |
| chr13 | 116828984 | 116829334 |

|       |           |           |
|-------|-----------|-----------|
| chr13 | 116926883 | 116927142 |
| chr13 | 116988779 | 116988970 |
| chr13 | 116990413 | 116990591 |
| chr13 | 117000578 | 117000834 |
| chr13 | 117000881 | 117001156 |
| chr13 | 117024085 | 117024310 |
| chr13 | 117024310 | 117024587 |
| chr13 | 117024587 | 117024920 |
| chr13 | 117024920 | 117025204 |
| chr13 | 117025293 | 117025600 |
| chr13 | 117025600 | 117025844 |
| chr13 | 117025844 | 117026088 |
| chr13 | 117127308 | 117127585 |
| chr13 | 117143713 | 117144229 |
| chr13 | 117202774 | 117202936 |
| chr13 | 117220459 | 117220745 |
| chr13 | 117220745 | 117220983 |
| chr13 | 117220983 | 117221265 |
| chr13 | 117223100 | 117223313 |
| chr13 | 117223313 | 117223564 |
| chr13 | 117311564 | 117311714 |
| chr13 | 117413676 | 117414010 |
| chr13 | 117426065 | 117426302 |
| chr13 | 117467495 | 117467692 |
| chr13 | 117602231 | 117602779 |
| chr13 | 117669402 | 117669588 |
| chr13 | 117710822 | 117711151 |
| chr13 | 117847398 | 117847567 |
| chr13 | 117848881 | 117849101 |
| chr13 | 117898106 | 117898308 |
| chr13 | 117907873 | 117908117 |
| chr13 | 117931838 | 117932074 |
| chr13 | 117953760 | 117954053 |
| chr13 | 117959146 | 117959447 |
| chr13 | 118021308 | 118021503 |
| chr13 | 118027928 | 118028195 |
| chr13 | 118028195 | 118028401 |
| chr13 | 118035566 | 118035946 |
| chr13 | 118058620 | 118058862 |
| chr13 | 118124955 | 118125244 |
| chr13 | 118339114 | 118339411 |
| chr13 | 118339662 | 118339911 |

|       |           |           |
|-------|-----------|-----------|
| chr13 | 118379260 | 118379428 |
| chr13 | 118386507 | 118386920 |
| chr13 | 118386920 | 118387176 |
| chr13 | 118387176 | 118387656 |
| chr13 | 118555213 | 118555467 |
| chr13 | 118560408 | 118560612 |
| chr13 | 118570921 | 118571302 |
| chr13 | 118571361 | 118571603 |
| chr13 | 118739632 | 118739790 |
| chr13 | 118763778 | 118764066 |
| chr13 | 118772648 | 118772803 |
| chr13 | 118773058 | 118773565 |
| chr13 | 118803818 | 118803995 |
| chr13 | 118917286 | 118917517 |
| chr13 | 119143416 | 119143665 |
| chr13 | 119177777 | 119177976 |
| chr13 | 119177976 | 119178171 |
| chr13 | 119258657 | 119258816 |
| chr13 | 119283556 | 119283739 |
| chr13 | 119341923 | 119342167 |
| chr13 | 119378531 | 119378698 |
| chr13 | 119388899 | 119389129 |
| chr13 | 119408511 | 119409127 |
| chr13 | 119409127 | 119409410 |
| chr13 | 119409410 | 119409709 |
| chr13 | 119428197 | 119428630 |
| chr13 | 119428630 | 119429094 |
| chr13 | 119429094 | 119429469 |
| chr13 | 119429469 | 119429918 |
| chr13 | 119442359 | 119442545 |
| chr13 | 119461970 | 119462120 |
| chr13 | 119462348 | 119462573 |
| chr13 | 119462573 | 119462877 |
| chr13 | 119462925 | 119463135 |
| chr13 | 119463266 | 119463504 |
| chr13 | 119464676 | 119464827 |
| chr13 | 119471970 | 119472221 |
| chr13 | 119477846 | 119478127 |
| chr13 | 119487689 | 119487922 |
| chr13 | 119487922 | 119488196 |
| chr13 | 119488202 | 119488704 |
| chr13 | 119488704 | 119489110 |

|       |           |           |
|-------|-----------|-----------|
| chr13 | 119494093 | 119494293 |
| chr13 | 119596364 | 119596581 |
| chr13 | 119596637 | 119596899 |
| chr13 | 119596899 | 119597119 |
| chr13 | 119597573 | 119597785 |
| chr13 | 119598054 | 119598401 |
| chr13 | 119598565 | 119598769 |
| chr13 | 119598933 | 119599391 |
| chr13 | 119599796 | 119599988 |
| chr13 | 119600228 | 119600456 |
| chr13 | 119600456 | 119600649 |
| chr13 | 119601240 | 119601558 |
| chr13 | 119601558 | 119601813 |
| chr13 | 119601813 | 119602222 |
| chr13 | 119603302 | 119603478 |
| chr13 | 119609636 | 119609828 |
| chr13 | 119613493 | 119613650 |
| chr13 | 119613654 | 119613911 |
| chr13 | 119614462 | 119614631 |
| chr13 | 119615415 | 119615771 |
| chr13 | 119616091 | 119616258 |
| chr13 | 119616335 | 119616790 |
| chr13 | 119616919 | 119617129 |
| chr13 | 119617189 | 119617571 |
| chr13 | 119623679 | 119623978 |
| chr13 | 119626035 | 119626267 |
| chr13 | 119629143 | 119629392 |
| chr13 | 119629392 | 119629636 |
| chr13 | 119631616 | 119632129 |
| chr13 | 119635511 | 119635692 |
| chr13 | 119635692 | 119635868 |
| chr13 | 119640636 | 119640814 |
| chr13 | 119661444 | 119661887 |
| chr13 | 119661887 | 119662308 |
| chr13 | 119669361 | 119669868 |
| chr13 | 119673690 | 119674098 |
| chr13 | 119682253 | 119682514 |
| chr13 | 119683902 | 119684141 |
| chr13 | 119689909 | 119690262 |
| chr13 | 119690262 | 119690659 |
| chr13 | 119690659 | 119691022 |
| chr13 | 119703036 | 119703230 |

|       |           |           |
|-------|-----------|-----------|
| chr13 | 119704421 | 119704615 |
| chr13 | 119706012 | 119706307 |
| chr13 | 119707065 | 119707279 |
| chr13 | 119709801 | 119710033 |
| chr13 | 119710040 | 119710276 |
| chr13 | 119710276 | 119710528 |
| chr13 | 119710528 | 119710789 |
| chr13 | 119710789 | 119710993 |
| chr13 | 119712344 | 119712563 |
| chr13 | 119716741 | 119716979 |
| chr13 | 119722161 | 119722522 |
| chr13 | 119722522 | 119722839 |
| chr13 | 119724618 | 119724773 |
| chr13 | 119729578 | 119729728 |
| chr13 | 119737001 | 119737226 |
| chr13 | 119755168 | 119755687 |
| chr13 | 119755687 | 119756073 |
| chr13 | 119756073 | 119756405 |
| chr13 | 119766586 | 119766782 |
| chr13 | 119774282 | 119774497 |
| chr13 | 119783646 | 119783913 |
| chr13 | 119789948 | 119790100 |
| chr13 | 119790331 | 119790674 |
| chr13 | 119790674 | 119791002 |
| chr13 | 119791002 | 119791340 |
| chr13 | 119791340 | 119791671 |
| chr13 | 119800994 | 119801308 |
| chr13 | 119805686 | 119805998 |
| chr13 | 119835472 | 119835943 |
| chr13 | 119836305 | 119836486 |
| chr13 | 119836486 | 119836782 |
| chr13 | 119837845 | 119838009 |
| chr13 | 119838033 | 119838262 |
| chr13 | 119840048 | 119840277 |
| chr13 | 119965422 | 119965635 |
| chr13 | 119965635 | 119965924 |
| chr13 | 119965924 | 119966231 |
| chr13 | 119966279 | 119966460 |
| chr13 | 119991367 | 119991587 |
| chr13 | 119998761 | 119998949 |
| chr13 | 120021582 | 120021814 |
| chr13 | 120034737 | 120034902 |



|       |           |           |
|-------|-----------|-----------|
| chr13 | 120040308 | 120040458 |
| chr13 | 120041213 | 120041440 |
| chr13 | 120063582 | 120063761 |
| chr13 | 120070141 | 120070300 |
| chr13 | 120070941 | 120071159 |
| chr13 | 120096105 | 120096260 |
| chr13 | 120096336 | 120096645 |
| chr13 | 120096645 | 120096945 |
| chr13 | 120096945 | 120097163 |
| chr13 | 120183180 | 120183376 |
| chr13 | 120231946 | 120232101 |
| chr13 | 120321330 | 120321709 |
| chr14 | 3271877   | 3272298   |
| chr14 | 3279996   | 3280364   |
| chr14 | 3332989   | 3333190   |
| chr14 | 3333508   | 3333715   |
| chr14 | 3413508   | 3413721   |
| chr14 | 3521701   | 3522047   |
| chr14 | 3545466   | 3546190   |
| chr14 | 3652919   | 3653113   |
| chr14 | 3761082   | 3761432   |
| chr14 | 3893940   | 3894100   |
| chr14 | 3901932   | 3902177   |
| chr14 | 3922324   | 3922670   |
| chr14 | 4595276   | 4595438   |
| chr14 | 4603226   | 4603492   |
| chr14 | 4856453   | 4856658   |
| chr14 | 4940178   | 4940450   |
| chr14 | 4948211   | 4948485   |
| chr14 | 4968826   | 4969062   |
| chr14 | 4969062   | 4969410   |
| chr14 | 5459271   | 5459428   |
| chr14 | 5811765   | 5811915   |
| chr14 | 6107568   | 6107779   |
| chr14 | 6108042   | 6108331   |
| chr14 | 6108331   | 6108596   |
| chr14 | 6108596   | 6108857   |
| chr14 | 6108857   | 6109064   |
| chr14 | 6312860   | 6313081   |
| chr14 | 6334025   | 6334359   |
| chr14 | 6342128   | 6342419   |
| chr14 | 6604141   | 6604294   |

|       |         |         |
|-------|---------|---------|
| chr14 | 6604617 | 6604907 |
| chr14 | 6605147 | 6605326 |
| chr14 | 6636899 | 6637180 |
| chr14 | 6637180 | 6637688 |
| chr14 | 6658129 | 6658560 |
| chr14 | 6666229 | 6666568 |
| chr14 | 6674327 | 6674626 |
| chr14 | 6755934 | 6756173 |
| chr14 | 6756404 | 6756708 |
| chr14 | 6756708 | 6757093 |
| chr14 | 6757093 | 6757445 |
| chr14 | 6757445 | 6757659 |
| chr14 | 7104369 | 7104574 |
| chr14 | 7173496 | 7173653 |
| chr14 | 7174450 | 7174675 |
| chr14 | 7313956 | 7314106 |
| chr14 | 7394424 | 7394826 |
| chr14 | 7402511 | 7402824 |
| chr14 | 7487535 | 7487742 |
| chr14 | 7567411 | 7567563 |
| chr14 | 7568457 | 7568704 |
| chr14 | 7657516 | 7657725 |
| chr14 | 7657997 | 7658243 |
| chr14 | 7658294 | 7658480 |
| chr14 | 7658480 | 7658690 |
| chr14 | 7749576 | 7749731 |
| chr14 | 7765884 | 7766247 |
| chr14 | 7773926 | 7774215 |
| chr14 | 7791394 | 7791775 |
| chr14 | 7791775 | 7792119 |
| chr14 | 7801957 | 7802145 |
| chr14 | 7808317 | 7808757 |
| chr14 | 7808757 | 7809094 |
| chr14 | 7809514 | 7809986 |
| chr14 | 7812530 | 7812688 |
| chr14 | 7817733 | 7818115 |
| chr14 | 7818115 | 7818430 |
| chr14 | 7818430 | 7818736 |
| chr14 | 7818736 | 7819082 |
| chr14 | 7819580 | 7819782 |
| chr14 | 7824226 | 7824462 |
| chr14 | 7824703 | 7825078 |

|       |         |         |
|-------|---------|---------|
| chr14 | 7826108 | 7826369 |
| chr14 | 7826369 | 7826647 |
| chr14 | 7826647 | 7826912 |
| chr14 | 7826912 | 7827218 |
| chr14 | 7832777 | 7832932 |
| chr14 | 7833316 | 7834013 |
| chr14 | 7842967 | 7843241 |
| chr14 | 7846689 | 7847014 |
| chr14 | 7847699 | 7848283 |
| chr14 | 7850948 | 7851323 |
| chr14 | 7851438 | 7851778 |
| chr14 | 7851778 | 7852158 |
| chr14 | 7853690 | 7854149 |
| chr14 | 7857970 | 7858166 |
| chr14 | 7860609 | 7860788 |
| chr14 | 7861409 | 7861564 |
| chr14 | 7862345 | 7862603 |
| chr14 | 7863246 | 7863524 |
| chr14 | 7864060 | 7864229 |
| chr14 | 7864896 | 7865112 |
| chr14 | 7867339 | 7867526 |
| chr14 | 7870483 | 7870844 |
| chr14 | 7870844 | 7871187 |
| chr14 | 7871187 | 7871388 |
| chr14 | 7871388 | 7871709 |
| chr14 | 7873499 | 7873947 |
| chr14 | 7880354 | 7880640 |
| chr14 | 7896148 | 7896502 |
| chr14 | 7905863 | 7906054 |
| chr14 | 7912412 | 7912661 |
| chr14 | 7912661 | 7912889 |
| chr14 | 7922047 | 7922239 |
| chr14 | 7924052 | 7924259 |
| chr14 | 7926941 | 7927113 |
| chr14 | 7929207 | 7929380 |
| chr14 | 7932774 | 7933050 |
| chr14 | 7933412 | 7933692 |
| chr14 | 7935320 | 7935605 |
| chr14 | 7940663 | 7941133 |
| chr14 | 7941187 | 7941587 |
| chr14 | 7943102 | 7943457 |
| chr14 | 7944788 | 7944971 |

|       |         |         |
|-------|---------|---------|
| chr14 | 7945381 | 7945621 |
| chr14 | 7951925 | 7952245 |
| chr14 | 7952686 | 7953423 |
| chr14 | 7953982 | 7954568 |
| chr14 | 7961215 | 7961372 |
| chr14 | 7961468 | 7961810 |
| chr14 | 7961810 | 7962302 |
| chr14 | 7962486 | 7962768 |
| chr14 | 7962793 | 7962943 |
| chr14 | 7963129 | 7963617 |
| chr14 | 7964544 | 7964774 |
| chr14 | 7975303 | 7975485 |
| chr14 | 7989469 | 7989632 |
| chr14 | 7994219 | 7994527 |
| chr14 | 7994527 | 7994838 |
| chr14 | 7997298 | 7997457 |
| chr14 | 7998786 | 7999093 |
| chr14 | 7999093 | 7999434 |
| chr14 | 7999559 | 7999794 |
| chr14 | 8002731 | 8003078 |
| chr14 | 8005947 | 8006271 |
| chr14 | 8016300 | 8016644 |
| chr14 | 8016977 | 8017253 |
| chr14 | 8028629 | 8028812 |
| chr14 | 8042148 | 8042360 |
| chr14 | 8044433 | 8044587 |
| chr14 | 8045283 | 8045517 |
| chr14 | 8059996 | 8060170 |
| chr14 | 8080127 | 8080443 |
| chr14 | 8080443 | 8080761 |
| chr14 | 8080857 | 8081112 |
| chr14 | 8092594 | 8092744 |
| chr14 | 8097160 | 8097343 |
| chr14 | 8097917 | 8098293 |
| chr14 | 8098293 | 8098643 |
| chr14 | 8098755 | 8098905 |
| chr14 | 8099753 | 8100023 |
| chr14 | 8111296 | 8111498 |
| chr14 | 8111511 | 8111856 |
| chr14 | 8111856 | 8112146 |
| chr14 | 8112165 | 8112320 |
| chr14 | 8122276 | 8122564 |

|       |         |         |
|-------|---------|---------|
| chr14 | 8125278 | 8125736 |
| chr14 | 8128013 | 8128312 |
| chr14 | 8135114 | 8135565 |
| chr14 | 8154128 | 8154458 |
| chr14 | 8157081 | 8157321 |
| chr14 | 8161825 | 8162117 |
| chr14 | 8172646 | 8172871 |
| chr14 | 8172871 | 8173148 |
| chr14 | 8173148 | 8173543 |
| chr14 | 8173723 | 8173874 |
| chr14 | 8201863 | 8202098 |
| chr14 | 8208823 | 8209115 |
| chr14 | 8213666 | 8214642 |
| chr14 | 8214699 | 8214963 |
| chr14 | 8215533 | 8215726 |
| chr14 | 8220460 | 8220627 |
| chr14 | 8232038 | 8232673 |
| chr14 | 8233298 | 8233612 |
| chr14 | 8242473 | 8242741 |
| chr14 | 8251184 | 8251363 |
| chr14 | 8257120 | 8257385 |
| chr14 | 8258339 | 8258600 |
| chr14 | 8258681 | 8259310 |
| chr14 | 8268723 | 8268965 |
| chr14 | 8274735 | 8274956 |
| chr14 | 8277498 | 8277660 |
| chr14 | 8286574 | 8286923 |
| chr14 | 8294202 | 8294819 |
| chr14 | 8297945 | 8298161 |
| chr14 | 8300374 | 8300686 |
| chr14 | 8304972 | 8305156 |
| chr14 | 8305156 | 8305358 |
| chr14 | 8305366 | 8305668 |
| chr14 | 8306920 | 8307443 |
| chr14 | 8309636 | 8309913 |
| chr14 | 8309913 | 8310329 |
| chr14 | 8311125 | 8311385 |
| chr14 | 8314695 | 8314853 |
| chr14 | 8319644 | 8319838 |
| chr14 | 8325381 | 8325541 |
| chr14 | 8332262 | 8332665 |
| chr14 | 8332665 | 8333019 |

|       |         |         |
|-------|---------|---------|
| chr14 | 8346663 | 8346924 |
| chr14 | 8348979 | 8349277 |
| chr14 | 8356048 | 8356259 |
| chr14 | 8356267 | 8356507 |
| chr14 | 8356670 | 8357459 |
| chr14 | 8367074 | 8367867 |
| chr14 | 8387687 | 8387947 |
| chr14 | 8415229 | 8415408 |
| chr14 | 8418445 | 8419126 |
| chr14 | 8419598 | 8419788 |
| chr14 | 8429868 | 8430046 |
| chr14 | 8430640 | 8430926 |
| chr14 | 8430926 | 8431237 |
| chr14 | 8444469 | 8444687 |
| chr14 | 8460569 | 8460798 |
| chr14 | 8486333 | 8486502 |
| chr14 | 8486619 | 8486823 |
| chr14 | 8489146 | 8489334 |
| chr14 | 8608640 | 8608859 |
| chr14 | 8610218 | 8610440 |
| chr14 | 8651818 | 8651968 |
| chr14 | 8665789 | 8665939 |
| chr14 | 8665944 | 8666518 |
| chr14 | 8680445 | 8680769 |
| chr14 | 8682878 | 8683092 |
| chr14 | 8779184 | 8779370 |
| chr14 | 8789322 | 8789721 |
| chr14 | 8789879 | 8790046 |
| chr14 | 8799818 | 8800007 |
| chr14 | 8800338 | 8800554 |
| chr14 | 8909805 | 8909987 |
| chr14 | 8985546 | 8985698 |
| chr14 | 9015974 | 9016206 |
| chr14 | 9239475 | 9239652 |
| chr14 | 9245401 | 9245615 |
| chr14 | 9284493 | 9284665 |
| chr14 | 9284937 | 9285518 |
| chr14 | 9285948 | 9286290 |
| chr14 | 9289530 | 9289750 |
| chr14 | 9548011 | 9548237 |
| chr14 | 9618535 | 9618728 |
| chr14 | 9619978 | 9620166 |

|       |          |          |
|-------|----------|----------|
| chr14 | 9620363  | 9620543  |
| chr14 | 9669821  | 9670276  |
| chr14 | 9670392  | 9670745  |
| chr14 | 9766722  | 9766995  |
| chr14 | 9785896  | 9786160  |
| chr14 | 9805157  | 9805334  |
| chr14 | 9805989  | 9806192  |
| chr14 | 9828778  | 9829024  |
| chr14 | 9990588  | 9990982  |
| chr14 | 10129187 | 10129504 |
| chr14 | 10372355 | 10372529 |
| chr14 | 10445210 | 10445488 |
| chr14 | 10452985 | 10453253 |
| chr14 | 10453507 | 10453674 |
| chr14 | 10548595 | 10549051 |
| chr14 | 10551986 | 10552309 |
| chr14 | 10554796 | 10555006 |
| chr14 | 10658311 | 10658491 |
| chr14 | 10764012 | 10764263 |
| chr14 | 10777864 | 10778175 |
| chr14 | 10811615 | 10811915 |
| chr14 | 10822058 | 10822282 |
| chr14 | 10824170 | 10824328 |
| chr14 | 10882874 | 10883105 |
| chr14 | 10979970 | 10980155 |
| chr14 | 11148677 | 11148940 |
| chr14 | 11160787 | 11161058 |
| chr14 | 11161725 | 11161993 |
| chr14 | 11161993 | 11162300 |
| chr14 | 11397300 | 11397703 |
| chr14 | 11445979 | 11446134 |
| chr14 | 11553243 | 11553457 |
| chr14 | 11553457 | 11553687 |
| chr14 | 11553687 | 11553985 |
| chr14 | 11553985 | 11554225 |
| chr14 | 11554278 | 11554684 |
| chr14 | 11554684 | 11555020 |
| chr14 | 11556406 | 11556619 |
| chr14 | 11612280 | 11612514 |
| chr14 | 11612514 | 11612819 |
| chr14 | 11612864 | 11613154 |
| chr14 | 11613154 | 11613498 |

|       |          |          |
|-------|----------|----------|
| chr14 | 11615632 | 11616080 |
| chr14 | 11617511 | 11617773 |
| chr14 | 11618207 | 11618569 |
| chr14 | 11622901 | 11623095 |
| chr14 | 11641051 | 11641489 |
| chr14 | 11658716 | 11659054 |
| chr14 | 11680318 | 11680713 |
| chr14 | 11680713 | 11681030 |
| chr14 | 11681412 | 11681576 |
| chr14 | 11682528 | 11682866 |
| chr14 | 11683840 | 11684105 |
| chr14 | 11685486 | 11685660 |
| chr14 | 11811371 | 11811759 |
| chr14 | 11825913 | 11826247 |
| chr14 | 11826247 | 11826566 |
| chr14 | 11826566 | 11826899 |
| chr14 | 11826899 | 11827122 |
| chr14 | 11858089 | 11858413 |
| chr14 | 11915850 | 11916127 |
| chr14 | 12070900 | 12071413 |
| chr14 | 12072530 | 12072726 |
| chr14 | 12073498 | 12073786 |
| chr14 | 12116905 | 12117297 |
| chr14 | 12124807 | 12125013 |
| chr14 | 12139981 | 12140227 |
| chr14 | 12152018 | 12152239 |
| chr14 | 12242217 | 12242423 |
| chr14 | 12284058 | 12284394 |
| chr14 | 12284394 | 12284689 |
| chr14 | 12284689 | 12285049 |
| chr14 | 12537626 | 12537818 |
| chr14 | 12591904 | 12592175 |
| chr14 | 12915125 | 12915331 |
| chr14 | 12966500 | 12966712 |
| chr14 | 13001165 | 13001551 |
| chr14 | 13022714 | 13023222 |
| chr14 | 13090949 | 13091162 |
| chr14 | 13357975 | 13358445 |
| chr14 | 13361202 | 13361593 |
| chr14 | 13416681 | 13417170 |
| chr14 | 13551211 | 13551480 |
| chr14 | 13553622 | 13553946 |



|       |          |          |
|-------|----------|----------|
| chr14 | 13555534 | 13555741 |
| chr14 | 13597894 | 13598125 |
| chr14 | 13901676 | 13901848 |
| chr14 | 13901880 | 13902098 |
| chr14 | 13917744 | 13917949 |
| chr14 | 13950491 | 13950697 |
| chr14 | 13957903 | 13958078 |
| chr14 | 13960127 | 13960367 |
| chr14 | 13960586 | 13960912 |
| chr14 | 13960912 | 13961122 |
| chr14 | 13961122 | 13961377 |
| chr14 | 13961377 | 13961850 |
| chr14 | 14012214 | 14012865 |
| chr14 | 14012865 | 14013335 |
| chr14 | 14013335 | 14013661 |
| chr14 | 14019567 | 14019824 |
| chr14 | 14036418 | 14036626 |
| chr14 | 14037414 | 14037665 |
| chr14 | 14054475 | 14054693 |
| chr14 | 14058374 | 14058575 |
| chr14 | 14063464 | 14063677 |
| chr14 | 14088653 | 14088872 |
| chr14 | 14091285 | 14091513 |
| chr14 | 14091513 | 14091697 |
| chr14 | 14098677 | 14098919 |
| chr14 | 14119830 | 14120032 |
| chr14 | 14120225 | 14120428 |
| chr14 | 14120428 | 14120624 |
| chr14 | 14120624 | 14120832 |
| chr14 | 14120832 | 14121150 |
| chr14 | 14197166 | 14197524 |
| chr14 | 14237183 | 14237625 |
| chr14 | 14238264 | 14238585 |
| chr14 | 14294424 | 14294774 |
| chr14 | 14345438 | 14345982 |
| chr14 | 14345982 | 14346377 |
| chr14 | 14346377 | 14346710 |
| chr14 | 14347076 | 14347406 |
| chr14 | 14348083 | 14348275 |
| chr14 | 14348275 | 14348472 |
| chr14 | 14423381 | 14423641 |
| chr14 | 14596477 | 14596643 |

|       |          |          |
|-------|----------|----------|
| chr14 | 14604400 | 14604738 |
| chr14 | 14607145 | 14607358 |
| chr14 | 14628517 | 14628667 |
| chr14 | 14628744 | 14629013 |
| chr14 | 14632555 | 14632737 |
| chr14 | 14633025 | 14633472 |
| chr14 | 14633472 | 14633768 |
| chr14 | 14633768 | 14633941 |
| chr14 | 14639262 | 14639447 |
| chr14 | 14642723 | 14642987 |
| chr14 | 14643602 | 14643863 |
| chr14 | 14650426 | 14650647 |
| chr14 | 14702467 | 14702723 |
| chr14 | 14702723 | 14702973 |
| chr14 | 14702973 | 14703166 |
| chr14 | 14703166 | 14703398 |
| chr14 | 14703398 | 14703848 |
| chr14 | 14803876 | 14804214 |
| chr14 | 14833007 | 14833207 |
| chr14 | 14843258 | 14843462 |
| chr14 | 14863873 | 14864055 |
| chr14 | 14890537 | 14890935 |
| chr14 | 14905065 | 14905282 |
| chr14 | 14915394 | 14915545 |
| chr14 | 14985319 | 14985597 |
| chr14 | 15421064 | 15421412 |
| chr14 | 16191943 | 16192104 |
| chr14 | 16242862 | 16243652 |
| chr14 | 16243736 | 16244206 |
| chr14 | 16249096 | 16249439 |
| chr14 | 16249439 | 16249675 |
| chr14 | 16249675 | 16249900 |
| chr14 | 16256112 | 16256566 |
| chr14 | 16364157 | 16364349 |
| chr14 | 16364533 | 16364917 |
| chr14 | 16364917 | 16365418 |
| chr14 | 16365418 | 16365861 |
| chr14 | 16365861 | 16366170 |
| chr14 | 16366174 | 16366364 |
| chr14 | 16380213 | 16380533 |
| chr14 | 16384939 | 16385165 |
| chr14 | 16433296 | 16433497 |

|       |          |          |
|-------|----------|----------|
| chr14 | 16434457 | 16434695 |
| chr14 | 16447615 | 16447971 |
| chr14 | 16448602 | 16449052 |
| chr14 | 16483594 | 16483956 |
| chr14 | 16484024 | 16484291 |
| chr14 | 16484291 | 16484503 |
| chr14 | 16509933 | 16510113 |
| chr14 | 16510594 | 16510992 |
| chr14 | 16513475 | 16513659 |
| chr14 | 16526163 | 16526422 |
| chr14 | 16541712 | 16541957 |
| chr14 | 16545009 | 16545555 |
| chr14 | 16545593 | 16545806 |
| chr14 | 16545806 | 16546089 |
| chr14 | 16551147 | 16551302 |
| chr14 | 16551487 | 16551665 |
| chr14 | 16551665 | 16551891 |
| chr14 | 16551899 | 16552220 |
| chr14 | 16556936 | 16557217 |
| chr14 | 16557405 | 16557557 |
| chr14 | 16557919 | 16558507 |
| chr14 | 16566216 | 16566547 |
| chr14 | 16575207 | 16575929 |
| chr14 | 16577179 | 16577380 |
| chr14 | 16578805 | 16578999 |
| chr14 | 16587981 | 16588197 |
| chr14 | 16594524 | 16594973 |
| chr14 | 16598239 | 16598470 |
| chr14 | 16603301 | 16603487 |
| chr14 | 16605541 | 16605728 |
| chr14 | 16663173 | 16663502 |
| chr14 | 16677092 | 16677457 |
| chr14 | 16681769 | 16682123 |
| chr14 | 16682189 | 16682375 |
| chr14 | 16732133 | 16732337 |
| chr14 | 16765989 | 16766155 |
| chr14 | 16813814 | 16813964 |
| chr14 | 16818668 | 16818963 |
| chr14 | 16874985 | 16875191 |
| chr14 | 16883557 | 16883784 |
| chr14 | 16944555 | 16944710 |
| chr14 | 16954608 | 16954760 |

|       |          |          |
|-------|----------|----------|
| chr14 | 16957860 | 16958171 |
| chr14 | 16958412 | 16958588 |
| chr14 | 17012180 | 17012587 |
| chr14 | 17012786 | 17013178 |
| chr14 | 17023581 | 17023873 |
| chr14 | 17024310 | 17024556 |
| chr14 | 17063327 | 17063538 |
| chr14 | 17172745 | 17173066 |
| chr14 | 17207457 | 17207639 |
| chr14 | 17211578 | 17211848 |
| chr14 | 17212169 | 17212362 |
| chr14 | 17352759 | 17352996 |
| chr14 | 17388645 | 17388924 |
| chr14 | 17397034 | 17397413 |
| chr14 | 17402782 | 17403019 |
| chr14 | 17404157 | 17404382 |
| chr14 | 17406065 | 17406266 |
| chr14 | 17409542 | 17409801 |
| chr14 | 17443140 | 17443328 |
| chr14 | 17589645 | 17589871 |
| chr14 | 17659049 | 17659275 |
| chr14 | 17659324 | 17659481 |
| chr14 | 17660068 | 17660390 |
| chr14 | 17660390 | 17660737 |
| chr14 | 17660737 | 17661258 |
| chr14 | 17675051 | 17675532 |
| chr14 | 17675532 | 17675836 |
| chr14 | 17735514 | 17735818 |
| chr14 | 17737327 | 17737477 |
| chr14 | 17777024 | 17777214 |
| chr14 | 17784351 | 17784712 |
| chr14 | 17822814 | 17823054 |
| chr14 | 17857025 | 17857534 |
| chr14 | 17862335 | 17862633 |
| chr14 | 17862714 | 17863034 |
| chr14 | 17903216 | 17903459 |
| chr14 | 17911570 | 17911783 |
| chr14 | 17916682 | 17916999 |
| chr14 | 17917940 | 17918339 |
| chr14 | 17918410 | 17918691 |
| chr14 | 17918691 | 17919027 |
| chr14 | 17920168 | 17920638 |

|       |          |          |
|-------|----------|----------|
| chr14 | 17927561 | 17927752 |
| chr14 | 17967187 | 17967421 |
| chr14 | 17967421 | 17967656 |
| chr14 | 18175775 | 18175953 |
| chr14 | 18201111 | 18201358 |
| chr14 | 18204307 | 18204652 |
| chr14 | 18210873 | 18211089 |
| chr14 | 18219529 | 18219772 |
| chr14 | 18234075 | 18234287 |
| chr14 | 18238160 | 18238470 |
| chr14 | 18238470 | 18238845 |
| chr14 | 18238845 | 18239209 |
| chr14 | 18239209 | 18239625 |
| chr14 | 18265528 | 18265687 |
| chr14 | 18270514 | 18270686 |
| chr14 | 18270686 | 18270950 |
| chr14 | 18270950 | 18271553 |
| chr14 | 18280401 | 18280736 |
| chr14 | 18282007 | 18282203 |
| chr14 | 18329390 | 18329625 |
| chr14 | 18330814 | 18331061 |
| chr14 | 18331061 | 18331500 |
| chr14 | 18331500 | 18332169 |
| chr14 | 18355606 | 18355807 |
| chr14 | 18355879 | 18356117 |
| chr14 | 18375270 | 18375420 |
| chr14 | 18378046 | 18378237 |
| chr14 | 18387256 | 18387593 |
| chr14 | 18443084 | 18443306 |
| chr14 | 18443306 | 18443588 |
| chr14 | 18448729 | 18449029 |
| chr14 | 18455450 | 18455917 |
| chr14 | 18456238 | 18456631 |
| chr14 | 18460539 | 18460881 |
| chr14 | 18461210 | 18461386 |
| chr14 | 18462330 | 18462816 |
| chr14 | 18462816 | 18463268 |
| chr14 | 18463268 | 18463560 |
| chr14 | 18468279 | 18468438 |
| chr14 | 18468551 | 18468980 |
| chr14 | 18468980 | 18469229 |
| chr14 | 18480132 | 18480349 |

|       |          |          |
|-------|----------|----------|
| chr14 | 18494173 | 18494323 |
| chr14 | 18511145 | 18511393 |
| chr14 | 18530150 | 18530312 |
| chr14 | 18554677 | 18554870 |
| chr14 | 18555377 | 18555540 |
| chr14 | 18564965 | 18565275 |
| chr14 | 18574474 | 18574637 |
| chr14 | 18592221 | 18592527 |
| chr14 | 18619404 | 18619577 |
| chr14 | 18676330 | 18676502 |
| chr14 | 18678465 | 18678822 |
| chr14 | 18773746 | 18774175 |
| chr14 | 18774311 | 18774523 |
| chr14 | 18774564 | 18774897 |
| chr14 | 18778999 | 18779341 |
| chr14 | 18779597 | 18779750 |
| chr14 | 18820651 | 18820910 |
| chr14 | 18879343 | 18879712 |
| chr14 | 18879712 | 18880007 |
| chr14 | 18882600 | 18882840 |
| chr14 | 18882840 | 18883101 |
| chr14 | 18893082 | 18893304 |
| chr14 | 18893304 | 18893651 |
| chr14 | 18893651 | 18894103 |
| chr14 | 18894103 | 18894420 |
| chr14 | 18896744 | 18896978 |
| chr14 | 18939878 | 18940595 |
| chr14 | 18978404 | 18978587 |
| chr14 | 19036070 | 19036249 |
| chr14 | 19038932 | 19039155 |
| chr14 | 19040962 | 19041218 |
| chr14 | 19042021 | 19042319 |
| chr14 | 19042403 | 19042883 |
| chr14 | 19111708 | 19111874 |
| chr14 | 19151028 | 19151280 |
| chr14 | 19175399 | 19175549 |
| chr14 | 19178132 | 19178313 |
| chr14 | 19180280 | 19180630 |
| chr14 | 19189733 | 19189883 |
| chr14 | 19278071 | 19278297 |
| chr14 | 19415655 | 19415986 |
| chr14 | 19416119 | 19416272 |

|       |          |          |
|-------|----------|----------|
| chr14 | 19416866 | 19417126 |
| chr14 | 19417126 | 19417446 |
| chr14 | 19417446 | 19417723 |
| chr14 | 19417749 | 19418004 |
| chr14 | 19418103 | 19418371 |
| chr14 | 19418536 | 19418987 |
| chr14 | 19419206 | 19419432 |
| chr14 | 19486932 | 19487218 |
| chr14 | 19494988 | 19495292 |
| chr14 | 19584041 | 19584279 |
| chr14 | 19584515 | 19584815 |
| chr14 | 19584815 | 19585202 |
| chr14 | 19585202 | 19585563 |
| chr14 | 19585563 | 19585784 |
| chr14 | 19610522 | 19610681 |
| chr14 | 19610851 | 19611091 |
| chr14 | 19664810 | 19664960 |
| chr14 | 19665756 | 19666094 |
| chr14 | 19667009 | 19667200 |
| chr14 | 19705737 | 19705965 |
| chr14 | 19706585 | 19706754 |
| chr14 | 19707151 | 19707316 |
| chr14 | 19750937 | 19751388 |
| chr14 | 19803704 | 19803949 |
| chr14 | 19823290 | 19823485 |
| chr14 | 19823485 | 19823711 |
| chr14 | 19823711 | 19824088 |
| chr14 | 19841086 | 19841358 |
| chr14 | 19881392 | 19881590 |
| chr14 | 19964093 | 19964483 |
| chr14 | 19976610 | 19976823 |
| chr14 | 19976880 | 19977259 |
| chr14 | 19985007 | 19985225 |
| chr14 | 19986813 | 19987027 |
| chr14 | 19987098 | 19987337 |
| chr14 | 20032690 | 20033006 |
| chr14 | 20033006 | 20033362 |
| chr14 | 20033382 | 20033552 |
| chr14 | 20034448 | 20034598 |
| chr14 | 20043233 | 20043436 |
| chr14 | 20046030 | 20046222 |
| chr14 | 20067330 | 20067665 |

|       |          |          |
|-------|----------|----------|
| chr14 | 20070742 | 20070924 |
| chr14 | 20082601 | 20082952 |
| chr14 | 20082952 | 20083242 |
| chr14 | 20083242 | 20083513 |
| chr14 | 20098181 | 20098364 |
| chr14 | 20114058 | 20114403 |
| chr14 | 20117410 | 20117676 |
| chr14 | 20129867 | 20130053 |
| chr14 | 20135110 | 20135261 |
| chr14 | 20135282 | 20135601 |
| chr14 | 20135601 | 20136033 |
| chr14 | 20138994 | 20139497 |
| chr14 | 20139595 | 20139804 |
| chr14 | 20149050 | 20149479 |
| chr14 | 20153895 | 20154150 |
| chr14 | 20154248 | 20154485 |
| chr14 | 20154742 | 20155217 |
| chr14 | 20155217 | 20155658 |
| chr14 | 20155849 | 20156111 |
| chr14 | 20162472 | 20163039 |
| chr14 | 20165285 | 20165915 |
| chr14 | 20168617 | 20168779 |
| chr14 | 20169328 | 20169546 |
| chr14 | 20175231 | 20175491 |
| chr14 | 20180388 | 20180584 |
| chr14 | 20180586 | 20181090 |
| chr14 | 20181090 | 20181434 |
| chr14 | 20181434 | 20181688 |
| chr14 | 20181688 | 20182031 |
| chr14 | 20196915 | 20197082 |
| chr14 | 20208459 | 20208813 |
| chr14 | 20214245 | 20214561 |
| chr14 | 20229454 | 20229708 |
| chr14 | 20246794 | 20247317 |
| chr14 | 20249501 | 20249745 |
| chr14 | 20253242 | 20253643 |
| chr14 | 20256999 | 20257200 |
| chr14 | 20257265 | 20257508 |
| chr14 | 20258481 | 20258791 |
| chr14 | 20291221 | 20291639 |
| chr14 | 20294465 | 20294824 |
| chr14 | 20297684 | 20297932 |



|       |          |          |
|-------|----------|----------|
| chr14 | 20298182 | 20298485 |
| chr14 | 20311629 | 20311928 |
| chr14 | 20319542 | 20319694 |
| chr14 | 20328512 | 20328895 |
| chr14 | 20340224 | 20340441 |
| chr14 | 20345878 | 20346335 |
| chr14 | 20347757 | 20348030 |
| chr14 | 20348030 | 20348605 |
| chr14 | 20378350 | 20378643 |
| chr14 | 20388313 | 20388736 |
| chr14 | 20388736 | 20388923 |
| chr14 | 20388923 | 20389146 |
| chr14 | 20393215 | 20393981 |
| chr14 | 20400118 | 20400394 |
| chr14 | 20422915 | 20423600 |
| chr14 | 20428714 | 20428912 |
| chr14 | 20478449 | 20479158 |
| chr14 | 20479454 | 20479785 |
| chr14 | 20479785 | 20480253 |
| chr14 | 20502942 | 20503324 |
| chr14 | 20503324 | 20503555 |
| chr14 | 20545752 | 20546092 |
| chr14 | 20546092 | 20546392 |
| chr14 | 20546392 | 20546720 |
| chr14 | 20576206 | 20576483 |
| chr14 | 20607884 | 20608060 |
| chr14 | 20608699 | 20609131 |
| chr14 | 20609457 | 20609850 |
| chr14 | 20609850 | 20610125 |
| chr14 | 20610140 | 20610578 |
| chr14 | 20616516 | 20616690 |
| chr14 | 20629482 | 20629774 |
| chr14 | 20630853 | 20631146 |
| chr14 | 20631258 | 20631688 |
| chr14 | 20640030 | 20640232 |
| chr14 | 20640269 | 20640686 |
| chr14 | 20640686 | 20641207 |
| chr14 | 20655024 | 20655341 |
| chr14 | 20658403 | 20658826 |
| chr14 | 20660798 | 20661296 |
| chr14 | 20661296 | 20661713 |
| chr14 | 20667573 | 20667835 |

|       |          |          |
|-------|----------|----------|
| chr14 | 20673838 | 20674055 |
| chr14 | 20674094 | 20674495 |
| chr14 | 20674495 | 20674872 |
| chr14 | 20682492 | 20682701 |
| chr14 | 20682701 | 20682913 |
| chr14 | 20694292 | 20694463 |
| chr14 | 20694586 | 20694754 |
| chr14 | 20694805 | 20695100 |
| chr14 | 20695100 | 20695490 |
| chr14 | 20695490 | 20695993 |
| chr14 | 20697105 | 20697295 |
| chr14 | 20702045 | 20702259 |
| chr14 | 20702485 | 20702817 |
| chr14 | 20702817 | 20703156 |
| chr14 | 20703156 | 20703362 |
| chr14 | 20707142 | 20707419 |
| chr14 | 20707419 | 20707880 |
| chr14 | 20707940 | 20708231 |
| chr14 | 20708474 | 20708649 |
| chr14 | 20721500 | 20721743 |
| chr14 | 20724146 | 20724375 |
| chr14 | 20733929 | 20734177 |
| chr14 | 20734177 | 20734469 |
| chr14 | 20734469 | 20734799 |
| chr14 | 20737336 | 20737664 |
| chr14 | 20741511 | 20741680 |
| chr14 | 20757709 | 20757891 |
| chr14 | 20765562 | 20765949 |
| chr14 | 20765949 | 20766365 |
| chr14 | 20780245 | 20780529 |
| chr14 | 20785279 | 20785508 |
| chr14 | 20791541 | 20791722 |
| chr14 | 20793225 | 20793531 |
| chr14 | 20793531 | 20793843 |
| chr14 | 20793843 | 20794513 |
| chr14 | 20798850 | 20799100 |
| chr14 | 20803613 | 20803870 |
| chr14 | 20804989 | 20805333 |
| chr14 | 20805333 | 20805719 |
| chr14 | 20806161 | 20806563 |
| chr14 | 20806563 | 20806990 |
| chr14 | 20810394 | 20810548 |

|       |          |          |
|-------|----------|----------|
| chr14 | 20811252 | 20811678 |
| chr14 | 20818808 | 20819314 |
| chr14 | 20819314 | 20819744 |
| chr14 | 20827554 | 20827859 |
| chr14 | 20828876 | 20829089 |
| chr14 | 20829834 | 20830034 |
| chr14 | 20831174 | 20831570 |
| chr14 | 20834140 | 20834444 |
| chr14 | 20834444 | 20834682 |
| chr14 | 20836168 | 20836506 |
| chr14 | 20836506 | 20836992 |
| chr14 | 20844171 | 20844378 |
| chr14 | 20844796 | 20844990 |
| chr14 | 20846366 | 20846658 |
| chr14 | 20846665 | 20846815 |
| chr14 | 20847729 | 20847925 |
| chr14 | 20850316 | 20851009 |
| chr14 | 20863336 | 20863644 |
| chr14 | 20863778 | 20864145 |
| chr14 | 20865225 | 20865415 |
| chr14 | 20865557 | 20865754 |
| chr14 | 20865802 | 20866234 |
| chr14 | 20866387 | 20866677 |
| chr14 | 20871602 | 20871774 |
| chr14 | 20873366 | 20873649 |
| chr14 | 20874426 | 20874602 |
| chr14 | 20885181 | 20885365 |
| chr14 | 20885603 | 20885815 |
| chr14 | 20891687 | 20892413 |
| chr14 | 20902995 | 20903234 |
| chr14 | 20903234 | 20903515 |
| chr14 | 20914416 | 20914794 |
| chr14 | 20919330 | 20919540 |
| chr14 | 20923852 | 20924062 |
| chr14 | 20924120 | 20924380 |
| chr14 | 20924892 | 20925164 |
| chr14 | 20928863 | 20929250 |
| chr14 | 20929250 | 20929511 |
| chr14 | 20929511 | 20929775 |
| chr14 | 20929954 | 20930110 |
| chr14 | 20930639 | 20930807 |
| chr14 | 20936654 | 20936921 |

|       |          |          |
|-------|----------|----------|
| chr14 | 20938123 | 20938300 |
| chr14 | 20938393 | 20938985 |
| chr14 | 20947328 | 20947689 |
| chr14 | 20967313 | 20967622 |
| chr14 | 20969146 | 20969397 |
| chr14 | 20970417 | 20970580 |
| chr14 | 20973590 | 20974459 |
| chr14 | 20976786 | 20977000 |
| chr14 | 20985559 | 20985796 |
| chr14 | 20990163 | 20990419 |
| chr14 | 20993419 | 20993634 |
| chr14 | 21019078 | 21019305 |
| chr14 | 21031973 | 21032583 |
| chr14 | 21051689 | 21051846 |
| chr14 | 21051874 | 21052310 |
| chr14 | 21052310 | 21052685 |
| chr14 | 21052685 | 21053107 |
| chr14 | 21064026 | 21064302 |
| chr14 | 21065473 | 21065644 |
| chr14 | 21065644 | 21065865 |
| chr14 | 21065865 | 21066239 |
| chr14 | 21066545 | 21066729 |
| chr14 | 21069691 | 21069845 |
| chr14 | 21075722 | 21076083 |
| chr14 | 21076083 | 21076514 |
| chr14 | 21076559 | 21076764 |
| chr14 | 21082781 | 21083246 |
| chr14 | 21087423 | 21087639 |
| chr14 | 21087677 | 21088106 |
| chr14 | 21088870 | 21089124 |
| chr14 | 21112214 | 21112527 |
| chr14 | 21112701 | 21112924 |
| chr14 | 21112945 | 21113208 |
| chr14 | 21116030 | 21116280 |
| chr14 | 21135009 | 21135244 |
| chr14 | 21135356 | 21135634 |
| chr14 | 21136984 | 21137220 |
| chr14 | 21177916 | 21178083 |
| chr14 | 21203950 | 21204256 |
| chr14 | 21268127 | 21268703 |
| chr14 | 21272722 | 21272945 |
| chr14 | 21278449 | 21278626 |

|       |          |          |
|-------|----------|----------|
| chr14 | 21278918 | 21279283 |
| chr14 | 21279283 | 21279514 |
| chr14 | 21284165 | 21284385 |
| chr14 | 21307631 | 21307796 |
| chr14 | 21336086 | 21336353 |
| chr14 | 21337949 | 21338420 |
| chr14 | 21339031 | 21339195 |
| chr14 | 21350674 | 21350824 |
| chr14 | 21350872 | 21351254 |
| chr14 | 21389907 | 21390191 |
| chr14 | 21453831 | 21454325 |
| chr14 | 21472760 | 21473065 |
| chr14 | 21477216 | 21477449 |
| chr14 | 21499690 | 21499878 |
| chr14 | 21499878 | 21500098 |
| chr14 | 21500098 | 21500384 |
| chr14 | 21500384 | 21500658 |
| chr14 | 21500658 | 21500984 |
| chr14 | 21500984 | 21501448 |
| chr14 | 21525741 | 21526098 |
| chr14 | 21547988 | 21548311 |
| chr14 | 21549722 | 21550154 |
| chr14 | 21552996 | 21553478 |
| chr14 | 21553877 | 21554146 |
| chr14 | 21554146 | 21554369 |
| chr14 | 21585554 | 21585862 |
| chr14 | 21586359 | 21586694 |
| chr14 | 21606248 | 21606543 |
| chr14 | 21610321 | 21610543 |
| chr14 | 21659739 | 21659979 |
| chr14 | 21662537 | 21662845 |
| chr14 | 21672548 | 21672737 |
| chr14 | 21682640 | 21682887 |
| chr14 | 21682887 | 21683193 |
| chr14 | 21685558 | 21685768 |
| chr14 | 21695028 | 21695447 |
| chr14 | 21709639 | 21709818 |
| chr14 | 21721038 | 21721262 |
| chr14 | 21741844 | 21742178 |
| chr14 | 21742515 | 21742728 |
| chr14 | 21746901 | 21747200 |
| chr14 | 21747794 | 21748163 |

|       |          |          |
|-------|----------|----------|
| chr14 | 21750403 | 21750840 |
| chr14 | 21750910 | 21751313 |
| chr14 | 21751344 | 21751571 |
| chr14 | 21766480 | 21766872 |
| chr14 | 21806611 | 21807062 |
| chr14 | 21808226 | 21808574 |
| chr14 | 21808634 | 21808967 |
| chr14 | 21812893 | 21813136 |
| chr14 | 21817493 | 21817808 |
| chr14 | 21820878 | 21821441 |
| chr14 | 21822804 | 21822967 |
| chr14 | 21822967 | 21823153 |
| chr14 | 21826167 | 21826349 |
| chr14 | 21830697 | 21831089 |
| chr14 | 21831089 | 21831394 |
| chr14 | 21831394 | 21831745 |
| chr14 | 21831745 | 21832023 |
| chr14 | 21832212 | 21832387 |
| chr14 | 21841962 | 21842133 |
| chr14 | 21847581 | 21847858 |
| chr14 | 21847858 | 21848232 |
| chr14 | 21848232 | 21848669 |
| chr14 | 21848669 | 21849177 |
| chr14 | 21853426 | 21853676 |
| chr14 | 21853921 | 21854081 |
| chr14 | 21869964 | 21870200 |
| chr14 | 21932810 | 21933024 |
| chr14 | 21969043 | 21969265 |
| chr14 | 21981478 | 21981795 |
| chr14 | 21982730 | 21982955 |
| chr14 | 21986040 | 21986275 |
| chr14 | 21987415 | 21987669 |
| chr14 | 21987707 | 21988164 |
| chr14 | 21988346 | 21988590 |
| chr14 | 21988906 | 21989138 |
| chr14 | 21989336 | 21989570 |
| chr14 | 21989570 | 21989794 |
| chr14 | 21995118 | 21995506 |
| chr14 | 21995506 | 21995823 |
| chr14 | 22003747 | 22003949 |
| chr14 | 22019738 | 22019896 |
| chr14 | 22171781 | 22172143 |

|       |          |          |
|-------|----------|----------|
| chr14 | 22578347 | 22578512 |
| chr14 | 22578671 | 22578932 |
| chr14 | 22587285 | 22587648 |
| chr14 | 22587665 | 22588221 |
| chr14 | 22700354 | 22700535 |
| chr14 | 22727650 | 22727863 |
| chr14 | 23401165 | 23401389 |
| chr14 | 23561483 | 23561639 |
| chr14 | 23751249 | 23751517 |
| chr14 | 23885585 | 23885974 |
| chr14 | 23886050 | 23886525 |
| chr14 | 24059807 | 24060007 |
| chr14 | 24182004 | 24182465 |
| chr14 | 24183003 | 24183392 |
| chr14 | 24194018 | 24194168 |
| chr14 | 24199793 | 24200046 |
| chr14 | 24206303 | 24206706 |
| chr14 | 24206706 | 24207324 |
| chr14 | 24207436 | 24207660 |
| chr14 | 24212890 | 24213549 |
| chr14 | 24213659 | 24213867 |
| chr14 | 24222451 | 24222647 |
| chr14 | 24222789 | 24223372 |
| chr14 | 24228411 | 24228895 |
| chr14 | 24232526 | 24232939 |
| chr14 | 24232982 | 24233153 |
| chr14 | 24244256 | 24244580 |
| chr14 | 24244686 | 24245012 |
| chr14 | 24245012 | 24245319 |
| chr14 | 24245319 | 24245577 |
| chr14 | 24245577 | 24245809 |
| chr14 | 24245809 | 24246035 |
| chr14 | 24273142 | 24273353 |
| chr14 | 24273653 | 24273845 |
| chr14 | 24275698 | 24275848 |
| chr14 | 24307245 | 24307460 |
| chr14 | 24311197 | 24311431 |
| chr14 | 24358372 | 24358579 |
| chr14 | 24468818 | 24469132 |
| chr14 | 24469175 | 24469327 |
| chr14 | 24486524 | 24486838 |
| chr14 | 24486838 | 24487324 |

|       |          |          |
|-------|----------|----------|
| chr14 | 24490462 | 24490830 |
| chr14 | 24490830 | 24491035 |
| chr14 | 24491035 | 24491249 |
| chr14 | 24491321 | 24491500 |
| chr14 | 24497732 | 24497894 |
| chr14 | 24498788 | 24499248 |
| chr14 | 24499635 | 24499868 |
| chr14 | 24500350 | 24500539 |
| chr14 | 24500539 | 24500835 |
| chr14 | 24500850 | 24501016 |
| chr14 | 24778872 | 24779097 |
| chr14 | 24779097 | 24779396 |
| chr14 | 24779396 | 24779695 |
| chr14 | 24793638 | 24794013 |
| chr14 | 24794044 | 24794194 |
| chr14 | 25116492 | 25116724 |
| chr14 | 25155087 | 25155380 |
| chr14 | 25155380 | 25155743 |
| chr14 | 25155743 | 25156110 |
| chr14 | 25156110 | 25156504 |
| chr14 | 25160738 | 25161098 |
| chr14 | 25186071 | 25186480 |
| chr14 | 25186480 | 25186864 |
| chr14 | 25187860 | 25188083 |
| chr14 | 25189419 | 25189596 |
| chr14 | 25226561 | 25226968 |
| chr14 | 25248995 | 25249176 |
| chr14 | 25268027 | 25268243 |
| chr14 | 25304043 | 25304212 |
| chr14 | 25304212 | 25304427 |
| chr14 | 25304427 | 25304655 |
| chr14 | 25304655 | 25304869 |
| chr14 | 25313650 | 25314150 |
| chr14 | 25342059 | 25342292 |
| chr14 | 25345978 | 25346367 |
| chr14 | 25354496 | 25354800 |
| chr14 | 25365266 | 25365622 |
| chr14 | 25371573 | 25371974 |
| chr14 | 25377811 | 25378301 |
| chr14 | 25378301 | 25378705 |
| chr14 | 25378874 | 25379226 |
| chr14 | 25380607 | 25380859 |



|       |          |          |
|-------|----------|----------|
| chr14 | 25397016 | 25397216 |
| chr14 | 25397289 | 25397478 |
| chr14 | 25405346 | 25405518 |
| chr14 | 25451630 | 25452049 |
| chr14 | 25452049 | 25452361 |
| chr14 | 25457356 | 25457521 |
| chr14 | 25457587 | 25457949 |
| chr14 | 25458209 | 25458380 |
| chr14 | 25458380 | 25458556 |
| chr14 | 25458664 | 25459027 |
| chr14 | 25459027 | 25459371 |
| chr14 | 25459371 | 25459651 |
| chr14 | 25459692 | 25459857 |
| chr14 | 25461533 | 25461724 |
| chr14 | 25464552 | 25464893 |
| chr14 | 25464893 | 25465192 |
| chr14 | 25466370 | 25466648 |
| chr14 | 25467670 | 25467873 |
| chr14 | 25472591 | 25472840 |
| chr14 | 25473064 | 25473253 |
| chr14 | 25474029 | 25474405 |
| chr14 | 25474849 | 25475079 |
| chr14 | 25475954 | 25476469 |
| chr14 | 25481314 | 25481673 |
| chr14 | 25484064 | 25484449 |
| chr14 | 25486428 | 25486643 |
| chr14 | 25486771 | 25487059 |
| chr14 | 25487059 | 25487534 |
| chr14 | 25488106 | 25488425 |
| chr14 | 25489423 | 25489662 |
| chr14 | 25496060 | 25496582 |
| chr14 | 25496675 | 25496929 |
| chr14 | 25497040 | 25497400 |
| chr14 | 25497672 | 25498037 |
| chr14 | 25504907 | 25505784 |
| chr14 | 25515891 | 25516116 |
| chr14 | 25516640 | 25517137 |
| chr14 | 25517249 | 25517494 |
| chr14 | 25519610 | 25520216 |
| chr14 | 25526836 | 25527288 |
| chr14 | 25527288 | 25527810 |
| chr14 | 25532711 | 25532861 |

|       |          |          |
|-------|----------|----------|
| chr14 | 25532932 | 25533536 |
| chr14 | 25533667 | 25533858 |
| chr14 | 25533858 | 25534016 |
| chr14 | 25534054 | 25534426 |
| chr14 | 25538562 | 25538946 |
| chr14 | 25539794 | 25539986 |
| chr14 | 25551665 | 25552157 |
| chr14 | 25554665 | 25555115 |
| chr14 | 25561020 | 25561213 |
| chr14 | 25564207 | 25564404 |
| chr14 | 25565556 | 25566052 |
| chr14 | 25576723 | 25576990 |
| chr14 | 25576990 | 25577236 |
| chr14 | 25586695 | 25586938 |
| chr14 | 25586938 | 25587237 |
| chr14 | 25589419 | 25589579 |
| chr14 | 25600337 | 25600570 |
| chr14 | 25603519 | 25603928 |
| chr14 | 25606631 | 25606961 |
| chr14 | 25607245 | 25607553 |
| chr14 | 25627632 | 25628014 |
| chr14 | 25628550 | 25628786 |
| chr14 | 25629876 | 25630235 |
| chr14 | 25630235 | 25630638 |
| chr14 | 25630641 | 25630847 |
| chr14 | 25640346 | 25640946 |
| chr14 | 25646197 | 25646676 |
| chr14 | 25660756 | 25660938 |
| chr14 | 25663684 | 25663862 |
| chr14 | 25666782 | 25667023 |
| chr14 | 25667188 | 25667431 |
| chr14 | 25674002 | 25674571 |
| chr14 | 25676202 | 25676714 |
| chr14 | 25676714 | 25677015 |
| chr14 | 25677592 | 25677863 |
| chr14 | 25681872 | 25682483 |
| chr14 | 25693894 | 25694545 |
| chr14 | 25694549 | 25694854 |
| chr14 | 25700774 | 25701123 |
| chr14 | 25701123 | 25701515 |
| chr14 | 25701527 | 25701708 |
| chr14 | 25707180 | 25707476 |

|       |          |          |
|-------|----------|----------|
| chr14 | 25707768 | 25707936 |
| chr14 | 25707998 | 25708196 |
| chr14 | 25708279 | 25708797 |
| chr14 | 25711307 | 25711457 |
| chr14 | 25713514 | 25713730 |
| chr14 | 25714576 | 25714861 |
| chr14 | 25719482 | 25719716 |
| chr14 | 25726311 | 25726606 |
| chr14 | 25735280 | 25735609 |
| chr14 | 25747218 | 25747373 |
| chr14 | 25750703 | 25750932 |
| chr14 | 25755109 | 25755512 |
| chr14 | 25755790 | 25755977 |
| chr14 | 25768253 | 25768588 |
| chr14 | 25768588 | 25768922 |
| chr14 | 25768922 | 25769306 |
| chr14 | 25774211 | 25774389 |
| chr14 | 25776039 | 25776290 |
| chr14 | 25776290 | 25776624 |
| chr14 | 25780655 | 25780898 |
| chr14 | 25785865 | 25786088 |
| chr14 | 25800244 | 25800526 |
| chr14 | 25807283 | 25807470 |
| chr14 | 25811168 | 25811368 |
| chr14 | 25816471 | 25816768 |
| chr14 | 25832275 | 25832742 |
| chr14 | 25839630 | 25840196 |
| chr14 | 25841954 | 25842310 |
| chr14 | 25842310 | 25842520 |
| chr14 | 25842520 | 25842760 |
| chr14 | 25842881 | 25843326 |
| chr14 | 25848234 | 25848519 |
| chr14 | 25849262 | 25849422 |
| chr14 | 25855325 | 25855520 |
| chr14 | 25855549 | 25855846 |
| chr14 | 25855883 | 25856089 |
| chr14 | 25856937 | 25857265 |
| chr14 | 25857265 | 25857849 |
| chr14 | 25861745 | 25862176 |
| chr14 | 25862185 | 25862432 |
| chr14 | 25869235 | 25869400 |
| chr14 | 25873189 | 25873374 |

|       |          |          |
|-------|----------|----------|
| chr14 | 25876359 | 25876553 |
| chr14 | 25876569 | 25877094 |
| chr14 | 25881789 | 25882162 |
| chr14 | 25882933 | 25883152 |
| chr14 | 25883152 | 25883513 |
| chr14 | 25885988 | 25886197 |
| chr14 | 25886826 | 25886986 |
| chr14 | 25889021 | 25889340 |
| chr14 | 25891848 | 25892195 |
| chr14 | 25892195 | 25892455 |
| chr14 | 25895788 | 25896020 |
| chr14 | 25902391 | 25902567 |
| chr14 | 25902780 | 25902995 |
| chr14 | 25907358 | 25907635 |
| chr14 | 25918359 | 25918612 |
| chr14 | 25918612 | 25918889 |
| chr14 | 25926826 | 25927126 |
| chr14 | 25927126 | 25927454 |
| chr14 | 25927454 | 25927836 |
| chr14 | 25940238 | 25940472 |
| chr14 | 25954636 | 25954853 |
| chr14 | 25957776 | 25957971 |
| chr14 | 25958049 | 25958199 |
| chr14 | 26007492 | 26007761 |
| chr14 | 26013706 | 26013913 |
| chr14 | 26013996 | 26014530 |
| chr14 | 26016353 | 26016855 |
| chr14 | 26021571 | 26021934 |
| chr14 | 26022704 | 26023369 |
| chr14 | 26025758 | 26025947 |
| chr14 | 26026565 | 26026840 |
| chr14 | 26028797 | 26029102 |
| chr14 | 26031607 | 26031970 |
| chr14 | 26031970 | 26032224 |
| chr14 | 26042157 | 26042319 |
| chr14 | 26047109 | 26047359 |
| chr14 | 26058111 | 26058354 |
| chr14 | 26058354 | 26058649 |
| chr14 | 26066567 | 26066876 |
| chr14 | 26066876 | 26067208 |
| chr14 | 26067208 | 26067589 |
| chr14 | 26079990 | 26080225 |

|       |          |          |
|-------|----------|----------|
| chr14 | 26094399 | 26094622 |
| chr14 | 26097520 | 26097718 |
| chr14 | 26097782 | 26097965 |
| chr14 | 26147115 | 26147378 |
| chr14 | 26153316 | 26153527 |
| chr14 | 26153610 | 26154041 |
| chr14 | 26155948 | 26156476 |
| chr14 | 26161186 | 26161598 |
| chr14 | 26162317 | 26162874 |
| chr14 | 26165372 | 26165590 |
| chr14 | 26166199 | 26166370 |
| chr14 | 26168405 | 26168725 |
| chr14 | 26171253 | 26171586 |
| chr14 | 26171586 | 26171837 |
| chr14 | 26175226 | 26175451 |
| chr14 | 26181771 | 26181934 |
| chr14 | 26182188 | 26182343 |
| chr14 | 26186722 | 26186973 |
| chr14 | 26197711 | 26197957 |
| chr14 | 26197957 | 26198259 |
| chr14 | 26206186 | 26206498 |
| chr14 | 26206498 | 26206824 |
| chr14 | 26206824 | 26207205 |
| chr14 | 26219606 | 26219802 |
| chr14 | 26234016 | 26234225 |
| chr14 | 26237126 | 26237371 |
| chr14 | 26286764 | 26287030 |
| chr14 | 26292992 | 26293207 |
| chr14 | 26293240 | 26293695 |
| chr14 | 26303193 | 26303396 |
| chr14 | 26376735 | 26376961 |
| chr14 | 26436420 | 26436580 |
| chr14 | 26468002 | 26468246 |
| chr14 | 26491185 | 26491527 |
| chr14 | 26507410 | 26507750 |
| chr14 | 26510573 | 26510876 |
| chr14 | 26527694 | 26527849 |
| chr14 | 26533352 | 26533539 |
| chr14 | 26533791 | 26534222 |
| chr14 | 26534222 | 26534717 |
| chr14 | 26534717 | 26535167 |
| chr14 | 26535196 | 26535427 |

|       |          |          |
|-------|----------|----------|
| chr14 | 26540656 | 26540940 |
| chr14 | 26540940 | 26541224 |
| chr14 | 26547350 | 26547526 |
| chr14 | 26547868 | 26548087 |
| chr14 | 26562190 | 26562938 |
| chr14 | 26563079 | 26563281 |
| chr14 | 26579354 | 26579725 |
| chr14 | 26579725 | 26580069 |
| chr14 | 26580069 | 26580336 |
| chr14 | 26617740 | 26617894 |
| chr14 | 26637728 | 26638570 |
| chr14 | 26638700 | 26639047 |
| chr14 | 26640088 | 26640260 |
| chr14 | 26657090 | 26657240 |
| chr14 | 26659038 | 26659459 |
| chr14 | 26668334 | 26668545 |
| chr14 | 26668545 | 26668736 |
| chr14 | 26668736 | 26668995 |
| chr14 | 26668995 | 26669294 |
| chr14 | 26669294 | 26669542 |
| chr14 | 26669542 | 26669769 |
| chr14 | 26669805 | 26670160 |
| chr14 | 26687739 | 26687910 |
| chr14 | 26687910 | 26688147 |
| chr14 | 26688147 | 26688501 |
| chr14 | 26695258 | 26695551 |
| chr14 | 26695575 | 26695842 |
| chr14 | 26782401 | 26782614 |
| chr14 | 26794044 | 26794485 |
| chr14 | 26794516 | 26794777 |
| chr14 | 26878789 | 26879041 |
| chr14 | 26911226 | 26911497 |
| chr14 | 26969827 | 26970305 |
| chr14 | 26970305 | 26970954 |
| chr14 | 26981602 | 26981842 |
| chr14 | 26981851 | 26982111 |
| chr14 | 26982118 | 26982534 |
| chr14 | 27019785 | 27020117 |
| chr14 | 27022961 | 27023194 |
| chr14 | 27029846 | 27030077 |
| chr14 | 27031211 | 27031500 |
| chr14 | 27038763 | 27039291 |

|       |          |          |
|-------|----------|----------|
| chr14 | 27039291 | 27039718 |
| chr14 | 27045076 | 27045344 |
| chr14 | 27054042 | 27054230 |
| chr14 | 27058465 | 27058900 |
| chr14 | 27059268 | 27059418 |
| chr14 | 27069536 | 27069753 |
| chr14 | 27069795 | 27070111 |
| chr14 | 27070132 | 27070756 |
| chr14 | 27070867 | 27071094 |
| chr14 | 27071941 | 27072177 |
| chr14 | 27072177 | 27072381 |
| chr14 | 27096820 | 27097130 |
| chr14 | 27108791 | 27109057 |
| chr14 | 27109185 | 27109418 |
| chr14 | 27114226 | 27114660 |
| chr14 | 27114660 | 27115001 |
| chr14 | 27115001 | 27115323 |
| chr14 | 27115332 | 27115499 |
| chr14 | 27131346 | 27131856 |
| chr14 | 27131856 | 27132314 |
| chr14 | 27140081 | 27140235 |
| chr14 | 27149519 | 27149725 |
| chr14 | 27150052 | 27150309 |
| chr14 | 27150347 | 27150497 |
| chr14 | 27172952 | 27173213 |
| chr14 | 27173213 | 27173538 |
| chr14 | 27173541 | 27173719 |
| chr14 | 27174705 | 27175395 |
| chr14 | 27182028 | 27182233 |
| chr14 | 27182233 | 27182420 |
| chr14 | 27182420 | 27182666 |
| chr14 | 27183777 | 27183928 |
| chr14 | 27185183 | 27185560 |
| chr14 | 27187069 | 27187367 |
| chr14 | 27192555 | 27192857 |
| chr14 | 27196988 | 27197367 |
| chr14 | 27198347 | 27198534 |
| chr14 | 27198825 | 27199182 |
| chr14 | 27199210 | 27199405 |
| chr14 | 27199441 | 27199934 |
| chr14 | 27213956 | 27214161 |
| chr14 | 27214203 | 27214353 |

|       |          |          |
|-------|----------|----------|
| chr14 | 27223847 | 27224098 |
| chr14 | 27224670 | 27224829 |
| chr14 | 27225363 | 27225557 |
| chr14 | 27229427 | 27229776 |
| chr14 | 27234370 | 27234630 |
| chr14 | 27239580 | 27239950 |
| chr14 | 27242275 | 27242593 |
| chr14 | 27242808 | 27243090 |
| chr14 | 27243520 | 27243670 |
| chr14 | 27243766 | 27243959 |
| chr14 | 27249139 | 27249716 |
| chr14 | 27270806 | 27270966 |
| chr14 | 27271305 | 27271981 |
| chr14 | 27299460 | 27299625 |
| chr14 | 27299649 | 27300097 |
| chr14 | 27335793 | 27336137 |
| chr14 | 27336137 | 27336694 |
| chr14 | 27340778 | 27341009 |
| chr14 | 27341150 | 27341791 |
| chr14 | 27341791 | 27342078 |
| chr14 | 27347239 | 27347693 |
| chr14 | 27347754 | 27347910 |
| chr14 | 27371326 | 27371658 |
| chr14 | 27373481 | 27373870 |
| chr14 | 27376089 | 27376537 |
| chr14 | 27414065 | 27414259 |
| chr14 | 27428497 | 27429021 |
| chr14 | 27429021 | 27429377 |
| chr14 | 27429377 | 27429741 |
| chr14 | 27507993 | 27508284 |
| chr14 | 27508284 | 27508682 |
| chr14 | 27508685 | 27508878 |
| chr14 | 27512430 | 27512688 |
| chr14 | 27521083 | 27521601 |
| chr14 | 27521601 | 27522001 |
| chr14 | 27528234 | 27528456 |
| chr14 | 27558835 | 27559167 |
| chr14 | 27560530 | 27560793 |
| chr14 | 27589740 | 27589895 |
| chr14 | 27596383 | 27596611 |
| chr14 | 27622032 | 27622592 |
| chr14 | 27622592 | 27622931 |



|       |          |          |
|-------|----------|----------|
| chr14 | 27623425 | 27623701 |
| chr14 | 27628709 | 27629100 |
| chr14 | 27635735 | 27635946 |
| chr14 | 27636573 | 27636943 |
| chr14 | 27741669 | 27741821 |
| chr14 | 27754369 | 27754691 |
| chr14 | 27756981 | 27757250 |
| chr14 | 27808175 | 27808329 |
| chr14 | 27810811 | 27811158 |
| chr14 | 27811522 | 27812014 |
| chr14 | 27822570 | 27822904 |
| chr14 | 27823014 | 27823576 |
| chr14 | 27823824 | 27824291 |
| chr14 | 27860389 | 27860712 |
| chr14 | 27860712 | 27861015 |
| chr14 | 27862281 | 27862711 |
| chr14 | 27870460 | 27870828 |
| chr14 | 27943502 | 27943712 |
| chr14 | 27945391 | 27945661 |
| chr14 | 27948458 | 27948628 |
| chr14 | 27956815 | 27957078 |
| chr14 | 27990692 | 27990890 |
| chr14 | 28034103 | 28034369 |
| chr14 | 28035085 | 28035354 |
| chr14 | 28040440 | 28040797 |
| chr14 | 28113203 | 28113416 |
| chr14 | 28359555 | 28359828 |
| chr14 | 28369306 | 28369508 |
| chr14 | 28417052 | 28417381 |
| chr14 | 28430572 | 28430888 |
| chr14 | 28456360 | 28456666 |
| chr14 | 28490463 | 28490816 |
| chr14 | 28504717 | 28504941 |
| chr14 | 28504941 | 28505223 |
| chr14 | 28505225 | 28505409 |
| chr14 | 28505409 | 28505591 |
| chr14 | 28505722 | 28505992 |
| chr14 | 28507597 | 28507824 |
| chr14 | 28584344 | 28584577 |
| chr14 | 28731306 | 28731568 |
| chr14 | 28808145 | 28808527 |
| chr14 | 28884666 | 28884828 |

|       |          |          |
|-------|----------|----------|
| chr14 | 28884845 | 28885228 |
| chr14 | 28885228 | 28885450 |
| chr14 | 28894582 | 28894897 |
| chr14 | 28984284 | 28984500 |
| chr14 | 29080621 | 29081025 |
| chr14 | 29081977 | 29082819 |
| chr14 | 29090151 | 29090399 |
| chr14 | 29132191 | 29132351 |
| chr14 | 29136361 | 29136650 |
| chr14 | 29137701 | 29137851 |
| chr14 | 29178315 | 29178497 |
| chr14 | 29221115 | 29221507 |
| chr14 | 29230829 | 29231052 |
| chr14 | 29278440 | 29278630 |
| chr14 | 29362487 | 29362775 |
| chr14 | 29521371 | 29521781 |
| chr14 | 29722025 | 29722193 |
| chr14 | 29722501 | 29722688 |
| chr14 | 29865048 | 29865340 |
| chr14 | 29865340 | 29865727 |
| chr14 | 29865766 | 29865937 |
| chr14 | 29876372 | 29876611 |
| chr14 | 29946983 | 29947185 |
| chr14 | 29968020 | 29968760 |
| chr14 | 29978230 | 29978540 |
| chr14 | 29978540 | 29978893 |
| chr14 | 29978919 | 29979084 |
| chr14 | 29979084 | 29979241 |
| chr14 | 30008670 | 30009333 |
| chr14 | 30052904 | 30053199 |
| chr14 | 30056590 | 30056837 |
| chr14 | 30080217 | 30080405 |
| chr14 | 30119120 | 30119274 |
| chr14 | 30129541 | 30129696 |
| chr14 | 30137044 | 30137391 |
| chr14 | 30196355 | 30196569 |
| chr14 | 30218211 | 30218394 |
| chr14 | 30459941 | 30460175 |
| chr14 | 30464549 | 30464937 |
| chr14 | 30465108 | 30465219 |
| chr14 | 30465219 | 30465264 |
| chr14 | 30473627 | 30474110 |

|       |          |          |
|-------|----------|----------|
| chr14 | 30479211 | 30479728 |
| chr14 | 30479728 | 30480103 |
| chr14 | 30497696 | 30498012 |
| chr14 | 30498012 | 30498268 |
| chr14 | 30498268 | 30498597 |
| chr14 | 30516359 | 30516614 |
| chr14 | 30531499 | 30531766 |
| chr14 | 30531782 | 30532239 |
| chr14 | 30532818 | 30533110 |
| chr14 | 30541552 | 30541834 |
| chr14 | 30548087 | 30548420 |
| chr14 | 30548420 | 30548715 |
| chr14 | 30548836 | 30549285 |
| chr14 | 30549285 | 30549699 |
| chr14 | 30556600 | 30556986 |
| chr14 | 30561070 | 30561376 |
| chr14 | 30561376 | 30561636 |
| chr14 | 30561636 | 30562128 |
| chr14 | 30564449 | 30564776 |
| chr14 | 30570324 | 30570836 |
| chr14 | 30573277 | 30573447 |
| chr14 | 30573447 | 30573531 |
| chr14 | 30574092 | 30574268 |
| chr14 | 30574270 | 30574532 |
| chr14 | 30576060 | 30576220 |
| chr14 | 30576228 | 30576550 |
| chr14 | 30584034 | 30584457 |
| chr14 | 30586734 | 30586951 |
| chr14 | 30586951 | 30587150 |
| chr14 | 30587293 | 30587510 |
| chr14 | 30591489 | 30591724 |
| chr14 | 30592985 | 30593524 |
| chr14 | 30593524 | 30593977 |
| chr14 | 30599794 | 30600244 |
| chr14 | 30612545 | 30612805 |
| chr14 | 30612805 | 30613004 |
| chr14 | 30616852 | 30617029 |
| chr14 | 30618942 | 30619155 |
| chr14 | 30624099 | 30624593 |
| chr14 | 30625073 | 30625269 |
| chr14 | 30625295 | 30625697 |
| chr14 | 30625900 | 30626111 |

|       |          |          |
|-------|----------|----------|
| chr14 | 30626111 | 30626390 |
| chr14 | 30626390 | 30626727 |
| chr14 | 30630860 | 30631032 |
| chr14 | 30631251 | 30631541 |
| chr14 | 30635228 | 30635600 |
| chr14 | 30635600 | 30635925 |
| chr14 | 30637211 | 30637409 |
| chr14 | 30638079 | 30638353 |
| chr14 | 30642523 | 30642870 |
| chr14 | 30642870 | 30643252 |
| chr14 | 30643860 | 30644386 |
| chr14 | 30648433 | 30648661 |
| chr14 | 30648661 | 30648909 |
| chr14 | 30650974 | 30651397 |
| chr14 | 30654218 | 30654699 |
| chr14 | 30671120 | 30671482 |
| chr14 | 30671807 | 30672022 |
| chr14 | 30672022 | 30672302 |
| chr14 | 30699744 | 30700020 |
| chr14 | 30714932 | 30715276 |
| chr14 | 30715276 | 30715541 |
| chr14 | 30715541 | 30715808 |
| chr14 | 30715808 | 30716043 |
| chr14 | 30716043 | 30716335 |
| chr14 | 30716335 | 30716743 |
| chr14 | 30716839 | 30717270 |
| chr14 | 30789556 | 30789816 |
| chr14 | 30790602 | 30790821 |
| chr14 | 30791123 | 30791368 |
| chr14 | 30823181 | 30823586 |
| chr14 | 30825363 | 30825775 |
| chr14 | 30825775 | 30826191 |
| chr14 | 30827437 | 30827661 |
| chr14 | 30856730 | 30857432 |
| chr14 | 30865386 | 30865618 |
| chr14 | 30867084 | 30867377 |
| chr14 | 30875454 | 30875939 |
| chr14 | 30877807 | 30878176 |
| chr14 | 30878276 | 30878445 |
| chr14 | 30879152 | 30879558 |
| chr14 | 30888252 | 30888627 |
| chr14 | 30904258 | 30904757 |

|       |          |          |
|-------|----------|----------|
| chr14 | 30931923 | 30932132 |
| chr14 | 30938643 | 30938793 |
| chr14 | 30943963 | 30944243 |
| chr14 | 30944313 | 30944635 |
| chr14 | 30951021 | 30951539 |
| chr14 | 30951539 | 30951880 |
| chr14 | 30982219 | 30982467 |
| chr14 | 30991009 | 30991314 |
| chr14 | 31001264 | 31001519 |
| chr14 | 31001519 | 31001758 |
| chr14 | 31001758 | 31002032 |
| chr14 | 31002032 | 31002288 |
| chr14 | 31010232 | 31010536 |
| chr14 | 31011265 | 31011425 |
| chr14 | 31011653 | 31011933 |
| chr14 | 31017895 | 31018137 |
| chr14 | 31018790 | 31019229 |
| chr14 | 31019229 | 31019687 |
| chr14 | 31025895 | 31026158 |
| chr14 | 31062343 | 31062539 |
| chr14 | 31088519 | 31088908 |
| chr14 | 31090007 | 31090259 |
| chr14 | 31128354 | 31128580 |
| chr14 | 31128675 | 31129269 |
| chr14 | 31130809 | 31131401 |
| chr14 | 31139683 | 31139961 |
| chr14 | 31160024 | 31160224 |
| chr14 | 31160357 | 31160971 |
| chr14 | 31166488 | 31166681 |
| chr14 | 31188922 | 31189288 |
| chr14 | 31196088 | 31196274 |
| chr14 | 31197848 | 31198152 |
| chr14 | 31198152 | 31198475 |
| chr14 | 31198746 | 31198976 |
| chr14 | 31205223 | 31205517 |
| chr14 | 31205517 | 31205856 |
| chr14 | 31205856 | 31206174 |
| chr14 | 31206174 | 31206516 |
| chr14 | 31206516 | 31207107 |
| chr14 | 31212605 | 31212789 |
| chr14 | 31215267 | 31215487 |
| chr14 | 31215509 | 31215786 |

|       |          |          |
|-------|----------|----------|
| chr14 | 31217608 | 31218110 |
| chr14 | 31234043 | 31234294 |
| chr14 | 31250909 | 31251193 |
| chr14 | 31251193 | 31251392 |
| chr14 | 31251392 | 31251585 |
| chr14 | 31251585 | 31251928 |
| chr14 | 31269497 | 31269712 |
| chr14 | 31272210 | 31272493 |
| chr14 | 31316631 | 31316946 |
| chr14 | 31323830 | 31324192 |
| chr14 | 31327220 | 31327524 |
| chr14 | 31327796 | 31327970 |
| chr14 | 31336309 | 31336594 |
| chr14 | 31336594 | 31336841 |
| chr14 | 31336841 | 31337206 |
| chr14 | 31365437 | 31365659 |
| chr14 | 31367675 | 31367852 |
| chr14 | 31386039 | 31386500 |
| chr14 | 31386540 | 31386727 |
| chr14 | 31387025 | 31387384 |
| chr14 | 31387636 | 31387803 |
| chr14 | 31403747 | 31404014 |
| chr14 | 31404014 | 31404417 |
| chr14 | 31404427 | 31404622 |
| chr14 | 31404738 | 31404916 |
| chr14 | 31405767 | 31406126 |
| chr14 | 31414693 | 31414945 |
| chr14 | 31416954 | 31417153 |
| chr14 | 31417176 | 31417463 |
| chr14 | 31417494 | 31417659 |
| chr14 | 31417659 | 31417821 |
| chr14 | 31420723 | 31420897 |
| chr14 | 31423228 | 31423421 |
| chr14 | 31423564 | 31423719 |
| chr14 | 31428769 | 31428955 |
| chr14 | 31435168 | 31435519 |
| chr14 | 31435674 | 31436376 |
| chr14 | 31462339 | 31462577 |
| chr14 | 31471996 | 31472276 |
| chr14 | 31494525 | 31494934 |
| chr14 | 31494934 | 31495225 |
| chr14 | 31495225 | 31495503 |

|       |          |          |
|-------|----------|----------|
| chr14 | 31496134 | 31496505 |
| chr14 | 31510065 | 31510217 |
| chr14 | 31533243 | 31533559 |
| chr14 | 31573123 | 31573279 |
| chr14 | 31613797 | 31614031 |
| chr14 | 31640442 | 31640612 |
| chr14 | 31640651 | 31641147 |
| chr14 | 31641147 | 31641464 |
| chr14 | 31656537 | 31656782 |
| chr14 | 31656905 | 31657159 |
| chr14 | 31657957 | 31658194 |
| chr14 | 31659585 | 31659786 |
| chr14 | 31661673 | 31661827 |
| chr14 | 31662022 | 31662362 |
| chr14 | 31662362 | 31662755 |
| chr14 | 31662755 | 31663221 |
| chr14 | 31663945 | 31664376 |
| chr14 | 31669101 | 31669723 |
| chr14 | 31669723 | 31670162 |
| chr14 | 31686403 | 31686705 |
| chr14 | 31700419 | 31700784 |
| chr14 | 31726283 | 31726522 |
| chr14 | 31746321 | 31746528 |
| chr14 | 31768202 | 31768517 |
| chr14 | 31768517 | 31768895 |
| chr14 | 31769049 | 31769291 |
| chr14 | 31774248 | 31774445 |
| chr14 | 31781367 | 31781590 |
| chr14 | 31781590 | 31781831 |
| chr14 | 31781831 | 31782121 |
| chr14 | 31785650 | 31786057 |
| chr14 | 31786562 | 31786840 |
| chr14 | 31786986 | 31787243 |
| chr14 | 31794523 | 31794732 |
| chr14 | 31800925 | 31801256 |
| chr14 | 31829895 | 31830398 |
| chr14 | 31830398 | 31830822 |
| chr14 | 31830822 | 31831241 |
| chr14 | 31857682 | 31857862 |
| chr14 | 31868695 | 31868916 |
| chr14 | 31896619 | 31896805 |
| chr14 | 31902003 | 31902307 |

|       |          |          |
|-------|----------|----------|
| chr14 | 31902319 | 31902471 |
| chr14 | 31929300 | 31929688 |
| chr14 | 31929724 | 31929907 |
| chr14 | 31930296 | 31930802 |
| chr14 | 31931778 | 31932060 |
| chr14 | 31932078 | 31932246 |
| chr14 | 31934862 | 31935062 |
| chr14 | 31941647 | 31941805 |
| chr14 | 31944831 | 31945052 |
| chr14 | 31945090 | 31945619 |
| chr14 | 31946101 | 31946447 |
| chr14 | 31947220 | 31947614 |
| chr14 | 31947660 | 31947815 |
| chr14 | 31954966 | 31955242 |
| chr14 | 31962985 | 31963263 |
| chr14 | 31963263 | 31963555 |
| chr14 | 31963555 | 31963979 |
| chr14 | 31964034 | 31964429 |
| chr14 | 31970494 | 31970745 |
| chr14 | 31974498 | 31974683 |
| chr14 | 32009864 | 32010047 |
| chr14 | 32014867 | 32015479 |
| chr14 | 32015479 | 32015762 |
| chr14 | 32015857 | 32016324 |
| chr14 | 32022542 | 32022759 |
| chr14 | 32032562 | 32032999 |
| chr14 | 32037903 | 32038158 |
| chr14 | 32042283 | 32042445 |
| chr14 | 32049666 | 32049934 |
| chr14 | 32049934 | 32050228 |
| chr14 | 32050228 | 32050631 |
| chr14 | 32073192 | 32073477 |
| chr14 | 32073477 | 32073754 |
| chr14 | 32076868 | 32077233 |
| chr14 | 32085176 | 32085468 |
| chr14 | 32085468 | 32086133 |
| chr14 | 32086408 | 32086712 |
| chr14 | 32113995 | 32114375 |
| chr14 | 32117608 | 32117776 |
| chr14 | 32118329 | 32118877 |
| chr14 | 32121973 | 32122266 |
| chr14 | 32140440 | 32140592 |



|       |          |          |
|-------|----------|----------|
| chr14 | 32159210 | 32159438 |
| chr14 | 32159438 | 32159751 |
| chr14 | 32159751 | 32160064 |
| chr14 | 32160064 | 32160293 |
| chr14 | 32160293 | 32160477 |
| chr14 | 32165212 | 32165545 |
| chr14 | 32165545 | 32165985 |
| chr14 | 32177806 | 32178147 |
| chr14 | 32192522 | 32192752 |
| chr14 | 32193641 | 32193857 |
| chr14 | 32201386 | 32201770 |
| chr14 | 32201770 | 32202057 |
| chr14 | 32202057 | 32202298 |
| chr14 | 32202298 | 32202666 |
| chr14 | 32233870 | 32234059 |
| chr14 | 32304822 | 32305175 |
| chr14 | 32305175 | 32305454 |
| chr14 | 32309869 | 32310158 |
| chr14 | 32317957 | 32318175 |
| chr14 | 32321766 | 32322279 |
| chr14 | 32344719 | 32344919 |
| chr14 | 32351320 | 32351540 |
| chr14 | 32351540 | 32351760 |
| chr14 | 32388237 | 32388585 |
| chr14 | 32437452 | 32437625 |
| chr14 | 32482157 | 32482328 |
| chr14 | 32492553 | 32493011 |
| chr14 | 32493504 | 32494001 |
| chr14 | 32496162 | 32496347 |
| chr14 | 32496570 | 32496748 |
| chr14 | 32506432 | 32506793 |
| chr14 | 32513304 | 32513617 |
| chr14 | 32513617 | 32514096 |
| chr14 | 32516086 | 32516503 |
| chr14 | 32524138 | 32524396 |
| chr14 | 32530972 | 32531189 |
| chr14 | 32537376 | 32537557 |
| chr14 | 32537859 | 32538490 |
| chr14 | 32538643 | 32539142 |
| chr14 | 32587067 | 32587339 |
| chr14 | 32597244 | 32597501 |
| chr14 | 32609424 | 32609690 |

|       |          |          |
|-------|----------|----------|
| chr14 | 32629335 | 32629584 |
| chr14 | 32878603 | 32878823 |
| chr14 | 33084337 | 33084579 |
| chr14 | 33207086 | 33207470 |
| chr14 | 33212610 | 33212937 |
| chr14 | 33212950 | 33213170 |
| chr14 | 33213811 | 33214176 |
| chr14 | 33214176 | 33214506 |
| chr14 | 33214506 | 33214789 |
| chr14 | 33214789 | 33215011 |
| chr14 | 33235016 | 33235197 |
| chr14 | 33247532 | 33248091 |
| chr14 | 33250139 | 33250502 |
| chr14 | 33250502 | 33250720 |
| chr14 | 33250720 | 33250943 |
| chr14 | 33251062 | 33251229 |
| chr14 | 33257101 | 33257294 |
| chr14 | 33257453 | 33258040 |
| chr14 | 33258257 | 33258708 |
| chr14 | 33258708 | 33259125 |
| chr14 | 33264840 | 33265131 |
| chr14 | 33276310 | 33276677 |
| chr14 | 33277676 | 33277826 |
| chr14 | 33282407 | 33282749 |
| chr14 | 33282749 | 33283241 |
| chr14 | 33287881 | 33288363 |
| chr14 | 33302777 | 33302994 |
| chr14 | 33303329 | 33303578 |
| chr14 | 33303578 | 33303899 |
| chr14 | 33313488 | 33313990 |
| chr14 | 33314140 | 33314508 |
| chr14 | 33319351 | 33319576 |
| chr14 | 33319576 | 33319784 |
| chr14 | 33319784 | 33320105 |
| chr14 | 33320105 | 33320548 |
| chr14 | 33322747 | 33322911 |
| chr14 | 33329072 | 33329427 |
| chr14 | 33329427 | 33329786 |
| chr14 | 33335557 | 33336201 |
| chr14 | 33336201 | 33336626 |
| chr14 | 33338516 | 33338750 |
| chr14 | 33340934 | 33341214 |

|       |          |          |
|-------|----------|----------|
| chr14 | 33347674 | 33348168 |
| chr14 | 33348168 | 33348546 |
| chr14 | 33350011 | 33350204 |
| chr14 | 33350918 | 33351135 |
| chr14 | 33351135 | 33351413 |
| chr14 | 33352356 | 33352846 |
| chr14 | 33355294 | 33355622 |
| chr14 | 33357748 | 33357958 |
| chr14 | 33358143 | 33358348 |
| chr14 | 33358698 | 33359223 |
| chr14 | 33359223 | 33359540 |
| chr14 | 33363900 | 33364408 |
| chr14 | 33364923 | 33365073 |
| chr14 | 33370099 | 33370325 |
| chr14 | 33370755 | 33370910 |
| chr14 | 33370923 | 33371100 |
| chr14 | 33371275 | 33371614 |
| chr14 | 33443802 | 33444319 |
| chr14 | 33446843 | 33447304 |
| chr14 | 33447304 | 33447608 |
| chr14 | 33471546 | 33471725 |
| chr14 | 33498816 | 33499011 |
| chr14 | 33499011 | 33499259 |
| chr14 | 33673746 | 33673997 |
| chr14 | 33695460 | 33695618 |
| chr14 | 33701811 | 33701969 |
| chr14 | 33825102 | 33825317 |
| chr14 | 33825317 | 33825569 |
| chr14 | 33959451 | 33959623 |
| chr14 | 33974767 | 33974949 |
| chr14 | 33980383 | 33980649 |
| chr14 | 33987030 | 33987320 |
| chr14 | 34022464 | 34022666 |
| chr14 | 34042718 | 34042940 |
| chr14 | 34056971 | 34057195 |
| chr14 | 34080277 | 34080650 |
| chr14 | 34080650 | 34080860 |
| chr14 | 34085371 | 34085550 |
| chr14 | 34085666 | 34086123 |
| chr14 | 34087711 | 34088273 |
| chr14 | 34089877 | 34090243 |
| chr14 | 34097908 | 34098206 |

|       |          |          |
|-------|----------|----------|
| chr14 | 34099025 | 34099300 |
| chr14 | 34099300 | 34099534 |
| chr14 | 34103629 | 34104212 |
| chr14 | 34104835 | 34105280 |
| chr14 | 34106782 | 34106969 |
| chr14 | 34142095 | 34142279 |
| chr14 | 34142303 | 34142763 |
| chr14 | 34142871 | 34143053 |
| chr14 | 34152410 | 34152697 |
| chr14 | 34154640 | 34154950 |
| chr14 | 34154981 | 34155242 |
| chr14 | 34173657 | 34173830 |
| chr14 | 34188708 | 34188945 |
| chr14 | 34190461 | 34190658 |
| chr14 | 34198682 | 34198952 |
| chr14 | 34201004 | 34201200 |
| chr14 | 34201331 | 34201674 |
| chr14 | 34216680 | 34216830 |
| chr14 | 34219931 | 34220274 |
| chr14 | 34229078 | 34229535 |
| chr14 | 34235043 | 34235391 |
| chr14 | 34247456 | 34247751 |
| chr14 | 34249380 | 34249562 |
| chr14 | 34297167 | 34297509 |
| chr14 | 34297736 | 34297886 |
| chr14 | 34310202 | 34310597 |
| chr14 | 34310597 | 34311107 |
| chr14 | 34311156 | 34311500 |
| chr14 | 34317932 | 34318498 |
| chr14 | 34346101 | 34346457 |
| chr14 | 34355373 | 34355600 |
| chr14 | 34358493 | 34358679 |
| chr14 | 34362886 | 34363054 |
| chr14 | 34363064 | 34363433 |
| chr14 | 34363433 | 34363740 |
| chr14 | 34363740 | 34364089 |
| chr14 | 34366434 | 34366688 |
| chr14 | 34372718 | 34372966 |
| chr14 | 34373844 | 34374042 |
| chr14 | 34376401 | 34376573 |
| chr14 | 34401210 | 34401475 |
| chr14 | 34447658 | 34448001 |

|       |          |          |
|-------|----------|----------|
| chr14 | 34458989 | 34459208 |
| chr14 | 34464514 | 34464690 |
| chr14 | 34464891 | 34465041 |
| chr14 | 34467567 | 34467779 |
| chr14 | 34475000 | 34475209 |
| chr14 | 34492816 | 34493001 |
| chr14 | 34493791 | 34493953 |
| chr14 | 34501898 | 34502332 |
| chr14 | 34502332 | 34502713 |
| chr14 | 34502713 | 34503038 |
| chr14 | 34503038 | 34503424 |
| chr14 | 34508163 | 34508541 |
| chr14 | 34514204 | 34514398 |
| chr14 | 34532664 | 34533035 |
| chr14 | 34540658 | 34540863 |
| chr14 | 34548450 | 34548716 |
| chr14 | 34548716 | 34548966 |
| chr14 | 34548966 | 34549224 |
| chr14 | 34549224 | 34549440 |
| chr14 | 34549440 | 34549741 |
| chr14 | 34562535 | 34562769 |
| chr14 | 34570360 | 34570644 |
| chr14 | 34574187 | 34574402 |
| chr14 | 34580861 | 34581078 |
| chr14 | 34583993 | 34584217 |
| chr14 | 34584217 | 34584425 |
| chr14 | 34615181 | 34615538 |
| chr14 | 34616840 | 34617155 |
| chr14 | 34658046 | 34658286 |
| chr14 | 34661855 | 34662126 |
| chr14 | 34673258 | 34673680 |
| chr14 | 34673680 | 34674114 |
| chr14 | 34674114 | 34674488 |
| chr14 | 34674605 | 34674782 |
| chr14 | 34763747 | 34764101 |
| chr14 | 34764101 | 34764644 |
| chr14 | 34768437 | 34768721 |
| chr14 | 34768994 | 34769257 |
| chr14 | 34769292 | 34769469 |
| chr14 | 34769596 | 34769866 |
| chr14 | 34777917 | 34778175 |
| chr14 | 34781414 | 34781582 |

|       |          |          |
|-------|----------|----------|
| chr14 | 34784826 | 34785022 |
| chr14 | 34795454 | 34795642 |
| chr14 | 34806973 | 34807162 |
| chr14 | 34816398 | 34816555 |
| chr14 | 34820051 | 34820256 |
| chr14 | 34822653 | 34822803 |
| chr14 | 35051526 | 35051815 |
| chr14 | 35067177 | 35067412 |
| chr14 | 35692484 | 35692760 |
| chr14 | 36137768 | 36138127 |
| chr14 | 36145164 | 36145653 |
| chr14 | 36147266 | 36147669 |
| chr14 | 36316472 | 36316752 |
| chr14 | 36316752 | 36317021 |
| chr14 | 36340922 | 36341153 |
| chr14 | 36393090 | 36393487 |
| chr14 | 36495213 | 36495510 |
| chr14 | 36527107 | 36527725 |
| chr14 | 36538429 | 36538722 |
| chr14 | 36559704 | 36560078 |
| chr14 | 36583710 | 36584041 |
| chr14 | 36584041 | 36584297 |
| chr14 | 36584297 | 36584537 |
| chr14 | 36586022 | 36586204 |
| chr14 | 36603181 | 36603331 |
| chr14 | 36610309 | 36610626 |
| chr14 | 36611313 | 36611640 |
| chr14 | 36611640 | 36611928 |
| chr14 | 36691343 | 36691556 |
| chr14 | 36698458 | 36698662 |
| chr14 | 36698917 | 36699399 |
| chr14 | 36699399 | 36699709 |
| chr14 | 36726248 | 36726512 |
| chr14 | 36755443 | 36755913 |
| chr14 | 36756054 | 36756212 |
| chr14 | 36774401 | 36774690 |
| chr14 | 36779018 | 36779354 |
| chr14 | 36799824 | 36800235 |
| chr14 | 36802232 | 36802488 |
| chr14 | 36802488 | 36802828 |
| chr14 | 36805858 | 36806201 |
| chr14 | 36809054 | 36809334 |

|       |          |          |
|-------|----------|----------|
| chr14 | 36855127 | 36855306 |
| chr14 | 36862439 | 36862728 |
| chr14 | 36863445 | 36863692 |
| chr14 | 36863716 | 36863871 |
| chr14 | 36863943 | 36864427 |
| chr14 | 36867039 | 36867259 |
| chr14 | 36919204 | 36919544 |
| chr14 | 36952222 | 36952450 |
| chr14 | 36962428 | 36962975 |
| chr14 | 36968058 | 36968530 |
| chr14 | 36968530 | 36969195 |
| chr14 | 37033336 | 37033575 |
| chr14 | 37049473 | 37049694 |
| chr14 | 37098148 | 37098542 |
| chr14 | 37110674 | 37111065 |
| chr14 | 37111465 | 37111673 |
| chr14 | 37115828 | 37116094 |
| chr14 | 37117143 | 37117474 |
| chr14 | 37117711 | 37117879 |
| chr14 | 37119503 | 37119779 |
| chr14 | 37134644 | 37134868 |
| chr14 | 37134874 | 37135637 |
| chr14 | 37184820 | 37185186 |
| chr14 | 37234957 | 37235233 |
| chr14 | 37503096 | 37503424 |
| chr14 | 38206300 | 38206495 |
| chr14 | 40791714 | 40791864 |
| chr14 | 40793642 | 40793836 |
| chr14 | 40851815 | 40852020 |
| chr14 | 40885216 | 40885618 |
| chr14 | 40886897 | 40887105 |
| chr14 | 40894567 | 40894928 |
| chr14 | 40894928 | 40895154 |
| chr14 | 40895801 | 40895963 |
| chr14 | 40898041 | 40898240 |
| chr14 | 40902198 | 40902672 |
| chr14 | 40902672 | 40903132 |
| chr14 | 40903132 | 40903611 |
| chr14 | 40908426 | 40908615 |
| chr14 | 40914677 | 40915118 |
| chr14 | 40915118 | 40915435 |
| chr14 | 40915600 | 40915830 |

|       |          |          |
|-------|----------|----------|
| chr14 | 40917711 | 40917977 |
| chr14 | 40917977 | 40918167 |
| chr14 | 40918251 | 40918428 |
| chr14 | 40918428 | 40918649 |
| chr14 | 40926887 | 40927430 |
| chr14 | 40931196 | 40931376 |
| chr14 | 40935597 | 40935969 |
| chr14 | 40935969 | 40936376 |
| chr14 | 40937133 | 40937423 |
| chr14 | 40938356 | 40938506 |
| chr14 | 40947479 | 40947718 |
| chr14 | 40947796 | 40948065 |
| chr14 | 40948065 | 40948292 |
| chr14 | 40948478 | 40948950 |
| chr14 | 40949716 | 40950020 |
| chr14 | 40950069 | 40950353 |
| chr14 | 40956039 | 40956530 |
| chr14 | 40956530 | 40956858 |
| chr14 | 40958618 | 40958800 |
| chr14 | 40959300 | 40959613 |
| chr14 | 40965904 | 40966064 |
| chr14 | 40966361 | 40966753 |
| chr14 | 40966753 | 40967077 |
| chr14 | 40967077 | 40967609 |
| chr14 | 40972403 | 40972757 |
| chr14 | 40975208 | 40975481 |
| chr14 | 40979052 | 40979358 |
| chr14 | 40987087 | 40987573 |
| chr14 | 40995266 | 40995615 |
| chr14 | 40995615 | 40995869 |
| chr14 | 40995869 | 40996129 |
| chr14 | 40996172 | 40996705 |
| chr14 | 40999911 | 41000319 |
| chr14 | 41008138 | 41008418 |
| chr14 | 41013522 | 41013993 |
| chr14 | 41014018 | 41014215 |
| chr14 | 41017171 | 41017431 |
| chr14 | 41017431 | 41017849 |
| chr14 | 41018372 | 41018568 |
| chr14 | 41019215 | 41019574 |
| chr14 | 41031097 | 41031307 |
| chr14 | 41031307 | 41031622 |



|       |          |          |
|-------|----------|----------|
| chr14 | 41033501 | 41033655 |
| chr14 | 41035239 | 41035478 |
| chr14 | 41035511 | 41035761 |
| chr14 | 41040677 | 41040892 |
| chr14 | 41053300 | 41053684 |
| chr14 | 41053684 | 41054099 |
| chr14 | 41061327 | 41061624 |
| chr14 | 41072649 | 41072999 |
| chr14 | 41104893 | 41105177 |
| chr14 | 41105177 | 41105468 |
| chr14 | 41141494 | 41141733 |
| chr14 | 41162775 | 41162983 |
| chr14 | 41167215 | 41167625 |
| chr14 | 41185246 | 41185396 |
| chr14 | 41232167 | 41232317 |
| chr14 | 41265277 | 41265466 |
| chr14 | 41336634 | 41336788 |
| chr14 | 41337574 | 41337861 |
| chr14 | 41421613 | 41421951 |
| chr14 | 41421951 | 41422172 |
| chr14 | 41422172 | 41422461 |
| chr14 | 41425638 | 41426006 |
| chr14 | 41486985 | 41487198 |
| chr14 | 41489285 | 41489678 |
| chr14 | 41501157 | 41501396 |
| chr14 | 41644025 | 41644240 |
| chr14 | 41646421 | 41646660 |
| chr14 | 41699142 | 41699308 |
| chr14 | 41715039 | 41715303 |
| chr14 | 41723850 | 41724017 |
| chr14 | 41772305 | 41772634 |
| chr14 | 41983197 | 41983422 |
| chr14 | 42130697 | 42131046 |
| chr14 | 42131046 | 42131419 |
| chr14 | 42134750 | 42135086 |
| chr14 | 42172764 | 42173021 |
| chr14 | 42188317 | 42188530 |
| chr14 | 42190726 | 42190942 |
| chr14 | 42243895 | 42244103 |
| chr14 | 42452836 | 42453018 |
| chr14 | 42583643 | 42583854 |
| chr14 | 42797852 | 42798165 |

|       |          |          |
|-------|----------|----------|
| chr14 | 42850741 | 42850902 |
| chr14 | 42866594 | 42866904 |
| chr14 | 43013085 | 43013254 |
| chr14 | 43015496 | 43015806 |
| chr14 | 43073784 | 43074223 |
| chr14 | 43084888 | 43085119 |
| chr14 | 43085119 | 43085386 |
| chr14 | 43085386 | 43085595 |
| chr14 | 43089627 | 43089849 |
| chr14 | 43153803 | 43153970 |
| chr14 | 43164281 | 43164658 |
| chr14 | 43164658 | 43165080 |
| chr14 | 43168869 | 43169101 |
| chr14 | 43238877 | 43239158 |
| chr14 | 43245775 | 43245983 |
| chr14 | 43246735 | 43247088 |
| chr14 | 43247088 | 43247335 |
| chr14 | 43247335 | 43247586 |
| chr14 | 43249808 | 43249972 |
| chr14 | 43250638 | 43250898 |
| chr14 | 43250898 | 43251152 |
| chr14 | 43256862 | 43257060 |
| chr14 | 43269350 | 43269603 |
| chr14 | 43270660 | 43270813 |
| chr14 | 43277857 | 43278044 |
| chr14 | 43278072 | 43278518 |
| chr14 | 43278518 | 43278855 |
| chr14 | 43291045 | 43291384 |
| chr14 | 43296461 | 43296889 |
| chr14 | 43300449 | 43300663 |
| chr14 | 43300663 | 43300897 |
| chr14 | 43318898 | 43319195 |
| chr14 | 43319563 | 43319717 |
| chr14 | 43329697 | 43329984 |
| chr14 | 43333461 | 43333700 |
| chr14 | 43345231 | 43345660 |
| chr14 | 43347088 | 43347341 |
| chr14 | 43347478 | 43347692 |
| chr14 | 43347692 | 43347985 |
| chr14 | 43350504 | 43350817 |
| chr14 | 43361211 | 43361376 |
| chr14 | 43361782 | 43362089 |

|       |          |          |
|-------|----------|----------|
| chr14 | 43368127 | 43368320 |
| chr14 | 43368416 | 43368608 |
| chr14 | 43368893 | 43369332 |
| chr14 | 43377849 | 43378115 |
| chr14 | 43379924 | 43380339 |
| chr14 | 43413466 | 43413686 |
| chr14 | 43413686 | 43413805 |
| chr14 | 43419138 | 43419300 |
| chr14 | 43470050 | 43470212 |
| chr14 | 43478720 | 43478953 |
| chr14 | 43480467 | 43480646 |
| chr14 | 43480744 | 43481219 |
| chr14 | 43500893 | 43501045 |
| chr14 | 43514298 | 43514627 |
| chr14 | 43519970 | 43520137 |
| chr14 | 43520771 | 43521062 |
| chr14 | 43525195 | 43525605 |
| chr14 | 43527702 | 43527863 |
| chr14 | 43528565 | 43529202 |
| chr14 | 43529226 | 43529407 |
| chr14 | 43531702 | 43531910 |
| chr14 | 43532109 | 43532439 |
| chr14 | 43532439 | 43532950 |
| chr14 | 43605541 | 43605739 |
| chr14 | 43607933 | 43608229 |
| chr14 | 43610838 | 43610990 |
| chr14 | 43611246 | 43611525 |
| chr14 | 43804547 | 43804813 |
| chr14 | 43812145 | 43812324 |
| chr14 | 43812450 | 43812786 |
| chr14 | 43918249 | 43918443 |
| chr14 | 43925035 | 43925449 |
| chr14 | 43925449 | 43925799 |
| chr14 | 43933054 | 43933382 |
| chr14 | 43983989 | 43984224 |
| chr14 | 43987521 | 43987715 |
| chr14 | 44139642 | 44139856 |
| chr14 | 44182918 | 44183159 |
| chr14 | 44183159 | 44183408 |
| chr14 | 44186593 | 44186877 |
| chr14 | 44256680 | 44256837 |
| chr14 | 44256910 | 44257172 |

|       |          |          |
|-------|----------|----------|
| chr14 | 44361500 | 44361670 |
| chr14 | 44500022 | 44500188 |
| chr14 | 44503289 | 44503492 |
| chr14 | 44547846 | 44548176 |
| chr14 | 44703214 | 44703390 |
| chr14 | 44977381 | 44977575 |
| chr14 | 45211481 | 45211873 |
| chr14 | 45219179 | 45219884 |
| chr14 | 45219884 | 45220254 |
| chr14 | 45220254 | 45220468 |
| chr14 | 45220468 | 45220675 |
| chr14 | 45220675 | 45220861 |
| chr14 | 45317898 | 45318050 |
| chr14 | 45318060 | 45318688 |
| chr14 | 45318688 | 45318942 |
| chr14 | 45318942 | 45319144 |
| chr14 | 45325328 | 45325799 |
| chr14 | 45329149 | 45329306 |
| chr14 | 45329503 | 45329884 |
| chr14 | 45329884 | 45330324 |
| chr14 | 45350845 | 45351405 |
| chr14 | 45351405 | 45351879 |
| chr14 | 45387594 | 45387795 |
| chr14 | 45388420 | 45389311 |
| chr14 | 45398579 | 45398801 |
| chr14 | 45422411 | 45422700 |
| chr14 | 45423295 | 45423501 |
| chr14 | 45443194 | 45443506 |
| chr14 | 45463475 | 45463660 |
| chr14 | 45463682 | 45464006 |
| chr14 | 45477677 | 45478038 |
| chr14 | 45478918 | 45479125 |
| chr14 | 45479212 | 45479364 |
| chr14 | 45479375 | 45479730 |
| chr14 | 45492010 | 45492592 |
| chr14 | 45493033 | 45493245 |
| chr14 | 45528897 | 45529111 |
| chr14 | 45529288 | 45529684 |
| chr14 | 45529684 | 45529996 |
| chr14 | 45529996 | 45530382 |
| chr14 | 45530382 | 45530688 |
| chr14 | 45540279 | 45540518 |

|       |          |          |
|-------|----------|----------|
| chr14 | 45543322 | 45543786 |
| chr14 | 45561807 | 45561986 |
| chr14 | 45563502 | 45563715 |
| chr14 | 45566425 | 45566628 |
| chr14 | 45566628 | 45566863 |
| chr14 | 45629870 | 45630224 |
| chr14 | 45632945 | 45633109 |
| chr14 | 45634067 | 45634391 |
| chr14 | 45642043 | 45642322 |
| chr14 | 45642322 | 45642683 |
| chr14 | 45652766 | 45653069 |
| chr14 | 45656938 | 45657129 |
| chr14 | 45657132 | 45657392 |
| chr14 | 45657392 | 45657685 |
| chr14 | 45657685 | 45657990 |
| chr14 | 45657990 | 45658301 |
| chr14 | 45658301 | 45658750 |
| chr14 | 45690619 | 45691021 |
| chr14 | 45691101 | 45691251 |
| chr14 | 45692922 | 45693081 |
| chr14 | 45732458 | 45732813 |
| chr14 | 45764341 | 45764661 |
| chr14 | 45769409 | 45769811 |
| chr14 | 45772664 | 45772895 |
| chr14 | 45812736 | 45812905 |
| chr14 | 45842573 | 45842842 |
| chr14 | 45849893 | 45850492 |
| chr14 | 45850492 | 45850991 |
| chr14 | 45859676 | 45860071 |
| chr14 | 45878406 | 45878638 |
| chr14 | 45878731 | 45878969 |
| chr14 | 45895667 | 45896026 |
| chr14 | 45958091 | 45958513 |
| chr14 | 45963204 | 45963796 |
| chr14 | 45963796 | 45964092 |
| chr14 | 45995690 | 45995854 |
| chr14 | 45996615 | 45997287 |
| chr14 | 46002105 | 46002443 |
| chr14 | 46060935 | 46061421 |
| chr14 | 46079502 | 46079747 |
| chr14 | 46084033 | 46084368 |
| chr14 | 46084368 | 46084594 |

|       |          |          |
|-------|----------|----------|
| chr14 | 46084594 | 46084832 |
| chr14 | 46144738 | 46145150 |
| chr14 | 46172639 | 46172833 |
| chr14 | 46227507 | 46227726 |
| chr14 | 46338832 | 46339142 |
| chr14 | 46357863 | 46358028 |
| chr14 | 46363287 | 46363575 |
| chr14 | 46387014 | 46387181 |
| chr14 | 46387188 | 46387745 |
| chr14 | 46387745 | 46388165 |
| chr14 | 46388775 | 46388990 |
| chr14 | 46394282 | 46394515 |
| chr14 | 46408357 | 46408864 |
| chr14 | 46409588 | 46409783 |
| chr14 | 46439722 | 46439907 |
| chr14 | 46478854 | 46479066 |
| chr14 | 46481046 | 46481261 |
| chr14 | 46500800 | 46501255 |
| chr14 | 46501468 | 46501672 |
| chr14 | 46512141 | 46512479 |
| chr14 | 46516056 | 46516626 |
| chr14 | 46516626 | 46516945 |
| chr14 | 46517316 | 46517571 |
| chr14 | 46519091 | 46519331 |
| chr14 | 46574347 | 46574732 |
| chr14 | 46577985 | 46578390 |
| chr14 | 46578468 | 46578817 |
| chr14 | 46596434 | 46596595 |
| chr14 | 46613806 | 46614053 |
| chr14 | 46634287 | 46634642 |
| chr14 | 46634672 | 46635178 |
| chr14 | 46635306 | 46635715 |
| chr14 | 46636161 | 46636770 |
| chr14 | 46660662 | 46661129 |
| chr14 | 46661183 | 46661523 |
| chr14 | 46670929 | 46671446 |
| chr14 | 46702832 | 46703068 |
| chr14 | 46703261 | 46703417 |
| chr14 | 46704063 | 46704737 |
| chr14 | 46721045 | 46721267 |
| chr14 | 46721267 | 46721502 |
| chr14 | 46722074 | 46722485 |

|       |          |          |
|-------|----------|----------|
| chr14 | 46723951 | 46724265 |
| chr14 | 46729139 | 46729652 |
| chr14 | 46760239 | 46760728 |
| chr14 | 46760728 | 46761075 |
| chr14 | 46770322 | 46770533 |
| chr14 | 46787806 | 46788125 |
| chr14 | 46788125 | 46788529 |
| chr14 | 46790454 | 46790682 |
| chr14 | 46790727 | 46791086 |
| chr14 | 46791108 | 46791265 |
| chr14 | 46798984 | 46799139 |
| chr14 | 46800637 | 46801011 |
| chr14 | 46801051 | 46801278 |
| chr14 | 46801278 | 46801504 |
| chr14 | 46818785 | 46818962 |
| chr14 | 46820108 | 46820285 |
| chr14 | 46821451 | 46821631 |
| chr14 | 46821709 | 46822089 |
| chr14 | 46822089 | 46822433 |
| chr14 | 46831911 | 46832341 |
| chr14 | 46832341 | 46832702 |
| chr14 | 46881030 | 46881204 |
| chr14 | 46881976 | 46882210 |
| chr14 | 46882210 | 46882430 |
| chr14 | 46882430 | 46882643 |
| chr14 | 46882643 | 46882843 |
| chr14 | 46882843 | 46883240 |
| chr14 | 46883398 | 46883613 |
| chr14 | 46883710 | 46883871 |
| chr14 | 46884065 | 46884310 |
| chr14 | 46884880 | 46885109 |
| chr14 | 46885953 | 46886212 |
| chr14 | 46887703 | 46887875 |
| chr14 | 46888021 | 46888183 |
| chr14 | 46908915 | 46909152 |
| chr14 | 46909152 | 46909393 |
| chr14 | 46909510 | 46910000 |
| chr14 | 46912505 | 46912761 |
| chr14 | 46924102 | 46924312 |
| chr14 | 46924462 | 46924682 |
| chr14 | 46925048 | 46925254 |
| chr14 | 46944446 | 46944708 |

|       |          |          |
|-------|----------|----------|
| chr14 | 46965846 | 46966190 |
| chr14 | 46966190 | 46966564 |
| chr14 | 46980463 | 46980661 |
| chr14 | 46980805 | 46981086 |
| chr14 | 46981089 | 46981451 |
| chr14 | 46988772 | 46989162 |
| chr14 | 46989162 | 46989563 |
| chr14 | 46989563 | 46990075 |
| chr14 | 46999042 | 46999266 |
| chr14 | 46999509 | 46999674 |
| chr14 | 47003725 | 47004136 |
| chr14 | 47004136 | 47004465 |
| chr14 | 47007217 | 47007698 |
| chr14 | 47011290 | 47011461 |
| chr14 | 47020905 | 47021296 |
| chr14 | 47022145 | 47022500 |
| chr14 | 47023513 | 47023942 |
| chr14 | 47024505 | 47024807 |
| chr14 | 47024960 | 47025110 |
| chr14 | 47031584 | 47031859 |
| chr14 | 47033850 | 47034103 |
| chr14 | 47034103 | 47034370 |
| chr14 | 47036784 | 47037109 |
| chr14 | 47037109 | 47037405 |
| chr14 | 47037463 | 47037711 |
| chr14 | 47043036 | 47043221 |
| chr14 | 47059093 | 47059276 |
| chr14 | 47075412 | 47075620 |
| chr14 | 47077495 | 47077985 |
| chr14 | 47078131 | 47078296 |
| chr14 | 47086551 | 47087169 |
| chr14 | 47087169 | 47087580 |
| chr14 | 47107465 | 47107851 |
| chr14 | 47108454 | 47108626 |
| chr14 | 47113412 | 47113764 |
| chr14 | 47116028 | 47116399 |
| chr14 | 47128114 | 47128320 |
| chr14 | 47134032 | 47134272 |
| chr14 | 47135319 | 47135540 |
| chr14 | 47161238 | 47161492 |
| chr14 | 47177821 | 47178249 |
| chr14 | 47179563 | 47179858 |



|       |          |          |
|-------|----------|----------|
| chr14 | 47186564 | 47186872 |
| chr14 | 47188685 | 47189197 |
| chr14 | 47189197 | 47189622 |
| chr14 | 47189648 | 47189847 |
| chr14 | 47208623 | 47208820 |
| chr14 | 47209181 | 47209436 |
| chr14 | 47242811 | 47243080 |
| chr14 | 47249808 | 47250172 |
| chr14 | 47250230 | 47250429 |
| chr14 | 47259049 | 47259201 |
| chr14 | 47276122 | 47276323 |
| chr14 | 47276323 | 47276646 |
| chr14 | 47276646 | 47277058 |
| chr14 | 47277058 | 47277412 |
| chr14 | 47297812 | 47298082 |
| chr14 | 47298082 | 47298447 |
| chr14 | 47298447 | 47298742 |
| chr14 | 47299053 | 47299203 |
| chr14 | 47302914 | 47303148 |
| chr14 | 47303306 | 47303804 |
| chr14 | 47308896 | 47309065 |
| chr14 | 47309102 | 47309393 |
| chr14 | 47311242 | 47311529 |
| chr14 | 47323215 | 47323382 |
| chr14 | 47327366 | 47327707 |
| chr14 | 47327751 | 47328088 |
| chr14 | 47334871 | 47335121 |
| chr14 | 47349954 | 47350131 |
| chr14 | 47351017 | 47351380 |
| chr14 | 47351468 | 47351618 |
| chr14 | 47352292 | 47352636 |
| chr14 | 47353985 | 47354361 |
| chr14 | 47354361 | 47354619 |
| chr14 | 47361719 | 47361944 |
| chr14 | 47366941 | 47367205 |
| chr14 | 47367464 | 47367690 |
| chr14 | 47367690 | 47367893 |
| chr14 | 47368267 | 47368557 |
| chr14 | 47371476 | 47372158 |
| chr14 | 47373672 | 47374102 |
| chr14 | 47374106 | 47374298 |
| chr14 | 47374359 | 47374701 |

|       |          |          |
|-------|----------|----------|
| chr14 | 47375202 | 47375419 |
| chr14 | 47377049 | 47377299 |
| chr14 | 47378490 | 47378672 |
| chr14 | 47382717 | 47383042 |
| chr14 | 47383895 | 47384086 |
| chr14 | 47384089 | 47384415 |
| chr14 | 47385480 | 47385790 |
| chr14 | 47385891 | 47386073 |
| chr14 | 47386215 | 47386474 |
| chr14 | 47387090 | 47387527 |
| chr14 | 47396153 | 47396555 |
| chr14 | 47417376 | 47417679 |
| chr14 | 47417796 | 47418134 |
| chr14 | 47418134 | 47418491 |
| chr14 | 47421711 | 47421944 |
| chr14 | 47433079 | 47433269 |
| chr14 | 47441373 | 47441572 |
| chr14 | 47472335 | 47472713 |
| chr14 | 47472713 | 47472942 |
| chr14 | 47472942 | 47473223 |
| chr14 | 47474655 | 47474918 |
| chr14 | 47482306 | 47482456 |
| chr14 | 47488735 | 47489047 |
| chr14 | 47496011 | 47496218 |
| chr14 | 47503987 | 47504355 |
| chr14 | 47504634 | 47504894 |
| chr14 | 47514915 | 47515090 |
| chr14 | 47515149 | 47515410 |
| chr14 | 47516708 | 47517127 |
| chr14 | 47518639 | 47519031 |
| chr14 | 47519181 | 47519369 |
| chr14 | 47524787 | 47525302 |
| chr14 | 47529119 | 47529339 |
| chr14 | 47533436 | 47534222 |
| chr14 | 47541656 | 47541923 |
| chr14 | 47548388 | 47548557 |
| chr14 | 47567944 | 47568326 |
| chr14 | 47568326 | 47568744 |
| chr14 | 47581391 | 47581594 |
| chr14 | 47597901 | 47598159 |
| chr14 | 47629393 | 47629600 |
| chr14 | 47634137 | 47634744 |

|       |          |          |
|-------|----------|----------|
| chr14 | 47638086 | 47638350 |
| chr14 | 47638529 | 47638858 |
| chr14 | 47648954 | 47649578 |
| chr14 | 47649578 | 47650110 |
| chr14 | 47654297 | 47654509 |
| chr14 | 47664540 | 47664812 |
| chr14 | 47665179 | 47665341 |
| chr14 | 47665433 | 47665758 |
| chr14 | 47703286 | 47703472 |
| chr14 | 47751854 | 47752131 |
| chr14 | 47753624 | 47753940 |
| chr14 | 47754189 | 47754633 |
| chr14 | 47766453 | 47766731 |
| chr14 | 47771682 | 47771837 |
| chr14 | 47776265 | 47776560 |
| chr14 | 47776560 | 47776777 |
| chr14 | 47795745 | 47796006 |
| chr14 | 47808522 | 47808791 |
| chr14 | 47813956 | 47814172 |
| chr14 | 47863081 | 47863448 |
| chr14 | 47868477 | 47868689 |
| chr14 | 47878147 | 47878366 |
| chr14 | 47944706 | 47945008 |
| chr14 | 47945802 | 47946062 |
| chr14 | 48120738 | 48121166 |
| chr14 | 48121258 | 48121728 |
| chr14 | 48189426 | 48189597 |
| chr14 | 48197410 | 48197566 |
| chr14 | 48212953 | 48213137 |
| chr14 | 48224821 | 48225114 |
| chr14 | 48225121 | 48225287 |
| chr14 | 48237113 | 48237583 |
| chr14 | 48241428 | 48241704 |
| chr14 | 48246276 | 48246555 |
| chr14 | 48249506 | 48249770 |
| chr14 | 48282829 | 48283116 |
| chr14 | 48283133 | 48283656 |
| chr14 | 48288397 | 48288605 |
| chr14 | 48288616 | 48288996 |
| chr14 | 48289668 | 48289927 |
| chr14 | 48290004 | 48290299 |
| chr14 | 48290299 | 48290586 |

|       |          |          |
|-------|----------|----------|
| chr14 | 48295491 | 48295757 |
| chr14 | 48295803 | 48296387 |
| chr14 | 48367183 | 48367336 |
| chr14 | 48370423 | 48370573 |
| chr14 | 48371869 | 48372079 |
| chr14 | 48421967 | 48422440 |
| chr14 | 48423058 | 48423259 |
| chr14 | 48423918 | 48424088 |
| chr14 | 48443807 | 48444089 |
| chr14 | 48445935 | 48446254 |
| chr14 | 48446254 | 48446746 |
| chr14 | 48458621 | 48458925 |
| chr14 | 48462466 | 48462866 |
| chr14 | 48679168 | 48679357 |
| chr14 | 48679395 | 48679654 |
| chr14 | 48679654 | 48680141 |
| chr14 | 48842191 | 48842347 |
| chr14 | 48949311 | 48949542 |
| chr14 | 48998823 | 48999001 |
| chr14 | 49033581 | 49033805 |
| chr14 | 49065902 | 49066259 |
| chr14 | 49066259 | 49066559 |
| chr14 | 49066559 | 49066977 |
| chr14 | 49074212 | 49074688 |
| chr14 | 49171353 | 49171611 |
| chr14 | 49171821 | 49172239 |
| chr14 | 49172239 | 49172540 |
| chr14 | 49172540 | 49172746 |
| chr14 | 49172746 | 49172952 |
| chr14 | 49172952 | 49173287 |
| chr14 | 49174686 | 49174881 |
| chr14 | 49238308 | 49238481 |
| chr14 | 49373010 | 49373265 |
| chr14 | 49373556 | 49373783 |
| chr14 | 49373783 | 49374124 |
| chr14 | 49376582 | 49376970 |
| chr14 | 49441722 | 49441910 |
| chr14 | 49458522 | 49458866 |
| chr14 | 49458973 | 49459170 |
| chr14 | 49464388 | 49464565 |
| chr14 | 49525177 | 49525488 |
| chr14 | 49783117 | 49783543 |

|       |          |          |
|-------|----------|----------|
| chr14 | 50061991 | 50062256 |
| chr14 | 50062256 | 50062533 |
| chr14 | 50062533 | 50062786 |
| chr14 | 50785015 | 50785214 |
| chr14 | 50785214 | 50785434 |
| chr14 | 50785434 | 50785718 |
| chr14 | 50788252 | 50788469 |
| chr14 | 50798590 | 50798815 |
| chr14 | 50799943 | 50800135 |
| chr14 | 50807268 | 50807780 |
| chr14 | 50807780 | 50808066 |
| chr14 | 50834100 | 50834345 |
| chr14 | 50859347 | 50859536 |
| chr14 | 50870009 | 50870219 |
| chr14 | 50870219 | 50870476 |
| chr14 | 50870476 | 50870822 |
| chr14 | 50870822 | 50871121 |
| chr14 | 50871231 | 50871404 |
| chr14 | 50896280 | 50896537 |
| chr14 | 50903983 | 50904233 |
| chr14 | 50904233 | 50904553 |
| chr14 | 50924478 | 50925012 |
| chr14 | 50925012 | 50925249 |
| chr14 | 50925249 | 50925425 |
| chr14 | 50930410 | 50930811 |
| chr14 | 50930811 | 50931557 |
| chr14 | 50939069 | 50939219 |
| chr14 | 50944248 | 50944639 |
| chr14 | 50944639 | 50944948 |
| chr14 | 50945138 | 50945359 |
| chr14 | 50947962 | 50948146 |
| chr14 | 50948146 | 50948360 |
| chr14 | 50955874 | 50956274 |
| chr14 | 50956274 | 50956561 |
| chr14 | 50956785 | 50957018 |
| chr14 | 50959816 | 50960061 |
| chr14 | 51026798 | 51027053 |
| chr14 | 51036309 | 51036480 |
| chr14 | 51063360 | 51063716 |
| chr14 | 51063727 | 51064083 |
| chr14 | 51064138 | 51064323 |
| chr14 | 51064489 | 51064757 |

|       |          |          |
|-------|----------|----------|
| chr14 | 51064757 | 51065061 |
| chr14 | 51065061 | 51065356 |
| chr14 | 51065356 | 51065619 |
| chr14 | 51069698 | 51069937 |
| chr14 | 51081173 | 51081407 |
| chr14 | 51082625 | 51083008 |
| chr14 | 51083008 | 51083260 |
| chr14 | 51083260 | 51083586 |
| chr14 | 51088610 | 51088836 |
| chr14 | 51088836 | 51089087 |
| chr14 | 51089087 | 51089395 |
| chr14 | 51089395 | 51089700 |
| chr14 | 51089700 | 51089927 |
| chr14 | 51090247 | 51090439 |
| chr14 | 51090543 | 51090797 |
| chr14 | 51090949 | 51091228 |
| chr14 | 51096108 | 51096495 |
| chr14 | 51098346 | 51098647 |
| chr14 | 51103414 | 51103576 |
| chr14 | 51132530 | 51132686 |
| chr14 | 51140554 | 51140714 |
| chr14 | 51147698 | 51147860 |
| chr14 | 51176325 | 51176559 |
| chr14 | 51187196 | 51187347 |
| chr14 | 51214175 | 51214343 |
| chr14 | 51218499 | 51218688 |
| chr14 | 51266190 | 51266426 |
| chr14 | 51633196 | 51633346 |
| chr14 | 51635574 | 51635780 |
| chr14 | 51735021 | 51735263 |
| chr14 | 51827926 | 51828145 |
| chr14 | 51838592 | 51838759 |
| chr14 | 51841770 | 51842111 |
| chr14 | 51842360 | 51842625 |
| chr14 | 51851093 | 51851310 |
| chr14 | 51863701 | 51863928 |
| chr14 | 51870793 | 51871115 |
| chr14 | 51877508 | 51878017 |
| chr14 | 51883561 | 51883948 |
| chr14 | 51884376 | 51884658 |
| chr14 | 51884658 | 51884996 |
| chr14 | 51884996 | 51885256 |

|       |          |          |
|-------|----------|----------|
| chr14 | 51893375 | 51893733 |
| chr14 | 51902876 | 51903108 |
| chr14 | 51904761 | 51904975 |
| chr14 | 51912652 | 51912942 |
| chr14 | 51912942 | 51913279 |
| chr14 | 51913279 | 51913640 |
| chr14 | 51913643 | 51913941 |
| chr14 | 51916496 | 51916791 |
| chr14 | 51930897 | 51931161 |
| chr14 | 51932184 | 51932608 |
| chr14 | 51932629 | 51933226 |
| chr14 | 51939128 | 51939339 |
| chr14 | 51954303 | 51954680 |
| chr14 | 51959521 | 51959731 |
| chr14 | 51960074 | 51960364 |
| chr14 | 51960364 | 51960790 |
| chr14 | 51963714 | 51964032 |
| chr14 | 51965311 | 51965558 |
| chr14 | 51984386 | 51984616 |
| chr14 | 51984616 | 51984783 |
| chr14 | 51984783 | 51985221 |
| chr14 | 51985345 | 51985548 |
| chr14 | 51985579 | 51985829 |
| chr14 | 51985829 | 51986206 |
| chr14 | 51987150 | 51987596 |
| chr14 | 52003998 | 52004337 |
| chr14 | 52004337 | 52004640 |
| chr14 | 52004870 | 52005154 |
| chr14 | 52008847 | 52009185 |
| chr14 | 52012208 | 52012393 |
| chr14 | 52013877 | 52014280 |
| chr14 | 52014590 | 52014814 |
| chr14 | 52014814 | 52015040 |
| chr14 | 52019351 | 52019608 |
| chr14 | 52019608 | 52019954 |
| chr14 | 52019954 | 52020432 |
| chr14 | 52020527 | 52020921 |
| chr14 | 52023081 | 52023426 |
| chr14 | 52045393 | 52045603 |
| chr14 | 52052716 | 52053064 |
| chr14 | 52053261 | 52053493 |
| chr14 | 52057871 | 52058174 |

|       |          |          |
|-------|----------|----------|
| chr14 | 52067528 | 52067678 |
| chr14 | 52069150 | 52069558 |
| chr14 | 52103880 | 52104322 |
| chr14 | 52104322 | 52104593 |
| chr14 | 52106898 | 52107119 |
| chr14 | 52118811 | 52119048 |
| chr14 | 52119048 | 52119287 |
| chr14 | 52119287 | 52119563 |
| chr14 | 52124009 | 52124235 |
| chr14 | 52164045 | 52164285 |
| chr14 | 52190747 | 52191005 |
| chr14 | 52196675 | 52197077 |
| chr14 | 52197077 | 52197377 |
| chr14 | 52197377 | 52197786 |
| chr14 | 52232340 | 52232555 |
| chr14 | 52234368 | 52234671 |
| chr14 | 52244072 | 52244389 |
| chr14 | 52244389 | 52244688 |
| chr14 | 52244688 | 52245053 |
| chr14 | 52246222 | 52246476 |
| chr14 | 52257365 | 52258244 |
| chr14 | 52278863 | 52279297 |
| chr14 | 52279297 | 52279740 |
| chr14 | 52279806 | 52280090 |
| chr14 | 52295718 | 52295948 |
| chr14 | 52304394 | 52304999 |
| chr14 | 52304999 | 52305479 |
| chr14 | 52311884 | 52312040 |
| chr14 | 52315704 | 52316030 |
| chr14 | 52316030 | 52316370 |
| chr14 | 52316397 | 52316584 |
| chr14 | 52316650 | 52316802 |
| chr14 | 52325995 | 52326162 |
| chr14 | 52338724 | 52338972 |
| chr14 | 52343058 | 52343279 |
| chr14 | 52343731 | 52343897 |
| chr14 | 52403191 | 52403375 |
| chr14 | 52768338 | 52768530 |
| chr14 | 52821748 | 52821905 |
| chr14 | 52918661 | 52918867 |
| chr14 | 52941816 | 52942112 |
| chr14 | 52942511 | 52942770 |



|       |          |          |
|-------|----------|----------|
| chr14 | 52948681 | 52948936 |
| chr14 | 52956692 | 52956875 |
| chr14 | 53032692 | 53032848 |
| chr14 | 53229630 | 53229845 |
| chr14 | 53252846 | 53253128 |
| chr14 | 53253539 | 53253797 |
| chr14 | 53259696 | 53259904 |
| chr14 | 53336882 | 53337032 |
| chr14 | 53516755 | 53516921 |
| chr14 | 53559584 | 53559746 |
| chr14 | 53582584 | 53582852 |
| chr14 | 53598691 | 53598882 |
| chr14 | 53604186 | 53604532 |
| chr14 | 53614418 | 53614648 |
| chr14 | 53615458 | 53615724 |
| chr14 | 53616119 | 53616348 |
| chr14 | 53619168 | 53619433 |
| chr14 | 53620862 | 53621104 |
| chr14 | 53621459 | 53621852 |
| chr14 | 53621893 | 53622048 |
| chr14 | 53633349 | 53633536 |
| chr14 | 53633653 | 53634130 |
| chr14 | 53634130 | 53634519 |
| chr14 | 53634607 | 53634891 |
| chr14 | 53634891 | 53635098 |
| chr14 | 53640655 | 53641053 |
| chr14 | 53649324 | 53649480 |
| chr14 | 53649664 | 53649814 |
| chr14 | 53683461 | 53683648 |
| chr14 | 53703692 | 53703889 |
| chr14 | 53710089 | 53710466 |
| chr14 | 53729327 | 53729504 |
| chr14 | 53738060 | 53738276 |
| chr14 | 53804313 | 53804585 |
| chr14 | 53896125 | 53896345 |
| chr14 | 53943355 | 53943689 |
| chr14 | 54032168 | 54032366 |
| chr14 | 54059853 | 54060090 |
| chr14 | 54061658 | 54061992 |
| chr14 | 54064575 | 54064862 |
| chr14 | 54064862 | 54065279 |
| chr14 | 54067925 | 54068193 |

|       |          |          |
|-------|----------|----------|
| chr14 | 54074719 | 54075203 |
| chr14 | 54097090 | 54097324 |
| chr14 | 54097475 | 54097673 |
| chr14 | 54097730 | 54098183 |
| chr14 | 54098183 | 54098878 |
| chr14 | 54105639 | 54106026 |
| chr14 | 54106142 | 54106333 |
| chr14 | 54106993 | 54107253 |
| chr14 | 54107253 | 54107720 |
| chr14 | 54108669 | 54109090 |
| chr14 | 54121075 | 54121689 |
| chr14 | 54122909 | 54123078 |
| chr14 | 54127521 | 54127717 |
| chr14 | 54128489 | 54128743 |
| chr14 | 54146414 | 54146808 |
| chr14 | 54152913 | 54153148 |
| chr14 | 54179344 | 54179590 |
| chr14 | 54184804 | 54184989 |
| chr14 | 54185049 | 54185265 |
| chr14 | 54185302 | 54185904 |
| chr14 | 54185904 | 54186329 |
| chr14 | 54186365 | 54186566 |
| chr14 | 54222112 | 54222583 |
| chr14 | 54222583 | 54222805 |
| chr14 | 54223369 | 54223620 |
| chr14 | 54223782 | 54223937 |
| chr14 | 54224082 | 54224457 |
| chr14 | 54224457 | 54224836 |
| chr14 | 54224836 | 54225217 |
| chr14 | 54225232 | 54225396 |
| chr14 | 54227254 | 54227854 |
| chr14 | 54230711 | 54230985 |
| chr14 | 54231124 | 54231396 |
| chr14 | 54232024 | 54232525 |
| chr14 | 54238909 | 54239394 |
| chr14 | 54239400 | 54239571 |
| chr14 | 54253533 | 54254300 |
| chr14 | 54254313 | 54254482 |
| chr14 | 54254907 | 54255097 |
| chr14 | 54259021 | 54259359 |
| chr14 | 54259359 | 54259784 |
| chr14 | 54259804 | 54259996 |

|       |          |          |
|-------|----------|----------|
| chr14 | 54282877 | 54283160 |
| chr14 | 54297109 | 54297286 |
| chr14 | 54340947 | 54341106 |
| chr14 | 54350330 | 54350480 |
| chr14 | 54360634 | 54360914 |
| chr14 | 54360914 | 54361161 |
| chr14 | 54361161 | 54361541 |
| chr14 | 54371089 | 54371397 |
| chr14 | 54383315 | 54383657 |
| chr14 | 54412835 | 54413077 |
| chr14 | 54413969 | 54414330 |
| chr14 | 54414345 | 54414622 |
| chr14 | 54414658 | 54414839 |
| chr14 | 54415267 | 54415523 |
| chr14 | 54423448 | 54423667 |
| chr14 | 54426276 | 54426507 |
| chr14 | 54426656 | 54427014 |
| chr14 | 54427014 | 54427254 |
| chr14 | 54431468 | 54431652 |
| chr14 | 54432262 | 54432489 |
| chr14 | 54433552 | 54433730 |
| chr14 | 54434059 | 54434511 |
| chr14 | 54435073 | 54435493 |
| chr14 | 54435493 | 54435882 |
| chr14 | 54448830 | 54449062 |
| chr14 | 54449062 | 54449325 |
| chr14 | 54449325 | 54449635 |
| chr14 | 54462691 | 54463107 |
| chr14 | 54463735 | 54463886 |
| chr14 | 54463986 | 54464262 |
| chr14 | 54464262 | 54464593 |
| chr14 | 54464593 | 54465027 |
| chr14 | 54475814 | 54476485 |
| chr14 | 54481282 | 54481548 |
| chr14 | 54481548 | 54481943 |
| chr14 | 54482646 | 54482796 |
| chr14 | 54487833 | 54488032 |
| chr14 | 54492367 | 54492629 |
| chr14 | 54492769 | 54493099 |
| chr14 | 54494258 | 54494561 |
| chr14 | 54501430 | 54501819 |
| chr14 | 54517082 | 54517883 |

|       |          |          |
|-------|----------|----------|
| chr14 | 54528494 | 54528759 |
| chr14 | 54528823 | 54528996 |
| chr14 | 54553533 | 54553683 |
| chr14 | 54553872 | 54554198 |
| chr14 | 54554198 | 54554511 |
| chr14 | 54554511 | 54554813 |
| chr14 | 54562681 | 54562937 |
| chr14 | 54569081 | 54569260 |
| chr14 | 54572757 | 54573202 |
| chr14 | 54573202 | 54573511 |
| chr14 | 54574194 | 54574602 |
| chr14 | 54575532 | 54575999 |
| chr14 | 54577460 | 54577727 |
| chr14 | 54578219 | 54578414 |
| chr14 | 54583745 | 54584007 |
| chr14 | 54585150 | 54585313 |
| chr14 | 54589054 | 54589289 |
| chr14 | 54596432 | 54596835 |
| chr14 | 54597138 | 54597399 |
| chr14 | 54603034 | 54603335 |
| chr14 | 54603335 | 54603686 |
| chr14 | 54605881 | 54606156 |
| chr14 | 54610033 | 54610294 |
| chr14 | 54616193 | 54616449 |
| chr14 | 54617478 | 54617814 |
| chr14 | 54617814 | 54618157 |
| chr14 | 54618157 | 54618404 |
| chr14 | 54634273 | 54634575 |
| chr14 | 54641047 | 54641276 |
| chr14 | 54641276 | 54641652 |
| chr14 | 54641652 | 54642020 |
| chr14 | 54644346 | 54644641 |
| chr14 | 54650646 | 54650921 |
| chr14 | 54651104 | 54651411 |
| chr14 | 54653573 | 54653920 |
| chr14 | 54654244 | 54654399 |
| chr14 | 54669492 | 54669731 |
| chr14 | 54678706 | 54678964 |
| chr14 | 54685670 | 54685891 |
| chr14 | 54686002 | 54686270 |
| chr14 | 54686270 | 54686526 |
| chr14 | 54686526 | 54686820 |

|       |          |          |
|-------|----------|----------|
| chr14 | 54686820 | 54687152 |
| chr14 | 54694985 | 54695174 |
| chr14 | 54701383 | 54701648 |
| chr14 | 54713698 | 54713853 |
| chr14 | 54714005 | 54714463 |
| chr14 | 54714622 | 54715211 |
| chr14 | 54767534 | 54767757 |
| chr14 | 54781106 | 54781347 |
| chr14 | 54781759 | 54782031 |
| chr14 | 54786008 | 54786235 |
| chr14 | 54817927 | 54818077 |
| chr14 | 54835710 | 54835864 |
| chr14 | 54835958 | 54836118 |
| chr14 | 54843558 | 54843730 |
| chr14 | 54863475 | 54863775 |
| chr14 | 54863775 | 54864061 |
| chr14 | 54864061 | 54864387 |
| chr14 | 54864416 | 54864635 |
| chr14 | 54870939 | 54871432 |
| chr14 | 54871434 | 54871614 |
| chr14 | 54876200 | 54876572 |
| chr14 | 54876572 | 54877004 |
| chr14 | 54877004 | 54877390 |
| chr14 | 54877390 | 54877686 |
| chr14 | 54883143 | 54883553 |
| chr14 | 54883553 | 54883839 |
| chr14 | 54883839 | 54884086 |
| chr14 | 54884451 | 54884647 |
| chr14 | 54886755 | 54886938 |
| chr14 | 54893583 | 54894226 |
| chr14 | 54894226 | 54894674 |
| chr14 | 54900469 | 54900735 |
| chr14 | 54903589 | 54904155 |
| chr14 | 54912203 | 54912429 |
| chr14 | 54912616 | 54912810 |
| chr14 | 54912993 | 54913181 |
| chr14 | 54925896 | 54926074 |
| chr14 | 54926074 | 54926289 |
| chr14 | 54929861 | 54930376 |
| chr14 | 54930408 | 54930804 |
| chr14 | 54931402 | 54931747 |
| chr14 | 54939395 | 54939809 |

|       |          |          |
|-------|----------|----------|
| chr14 | 54945741 | 54945935 |
| chr14 | 54945946 | 54946224 |
| chr14 | 55014609 | 55015043 |
| chr14 | 55015043 | 55015307 |
| chr14 | 55015307 | 55015599 |
| chr14 | 55015599 | 55015976 |
| chr14 | 55029099 | 55029278 |
| chr14 | 55054966 | 55055225 |
| chr14 | 55055225 | 55055527 |
| chr14 | 55055527 | 55055748 |
| chr14 | 55079306 | 55079584 |
| chr14 | 55091993 | 55092250 |
| chr14 | 55092250 | 55092654 |
| chr14 | 55094653 | 55094891 |
| chr14 | 55094891 | 55095297 |
| chr14 | 55098166 | 55098381 |
| chr14 | 55101834 | 55101989 |
| chr14 | 55105876 | 55106040 |
| chr14 | 55106166 | 55106456 |
| chr14 | 55106456 | 55106764 |
| chr14 | 55114050 | 55114238 |
| chr14 | 55114690 | 55115182 |
| chr14 | 55115182 | 55115461 |
| chr14 | 55115461 | 55115659 |
| chr14 | 55121983 | 55122294 |
| chr14 | 55124547 | 55124859 |
| chr14 | 55125775 | 55126037 |
| chr14 | 55153003 | 55153432 |
| chr14 | 55157464 | 55157625 |
| chr14 | 55161203 | 55161671 |
| chr14 | 55166639 | 55167024 |
| chr14 | 55167024 | 55167467 |
| chr14 | 55177398 | 55177576 |
| chr14 | 55194802 | 55194982 |
| chr14 | 55205124 | 55205386 |
| chr14 | 55208006 | 55208336 |
| chr14 | 55208336 | 55208672 |
| chr14 | 55208703 | 55208899 |
| chr14 | 55279345 | 55279640 |
| chr14 | 55458341 | 55458601 |
| chr14 | 55459963 | 55460129 |
| chr14 | 55469136 | 55469291 |

|       |          |          |
|-------|----------|----------|
| chr14 | 55477494 | 55477662 |
| chr14 | 55478624 | 55479052 |
| chr14 | 55479052 | 55479445 |
| chr14 | 55490981 | 55491264 |
| chr14 | 55491264 | 55491532 |
| chr14 | 55491532 | 55491844 |
| chr14 | 55497121 | 55497804 |
| chr14 | 55520463 | 55520946 |
| chr14 | 55520946 | 55521294 |
| chr14 | 55540042 | 55540622 |
| chr14 | 55540622 | 55541038 |
| chr14 | 55554473 | 55554828 |
| chr14 | 55557065 | 55557361 |
| chr14 | 55559733 | 55560140 |
| chr14 | 55560157 | 55560614 |
| chr14 | 55560614 | 55561031 |
| chr14 | 55578048 | 55578303 |
| chr14 | 55578303 | 55578637 |
| chr14 | 55578637 | 55578962 |
| chr14 | 55578981 | 55579181 |
| chr14 | 55584650 | 55584821 |
| chr14 | 55584924 | 55585497 |
| chr14 | 55585607 | 55585772 |
| chr14 | 55590844 | 55591251 |
| chr14 | 55591251 | 55591561 |
| chr14 | 55591561 | 55591892 |
| chr14 | 55591892 | 55592141 |
| chr14 | 55603759 | 55604280 |
| chr14 | 55604280 | 55604594 |
| chr14 | 55629387 | 55629622 |
| chr14 | 55634996 | 55635506 |
| chr14 | 55635506 | 55635909 |
| chr14 | 55642825 | 55643238 |
| chr14 | 55643238 | 55643463 |
| chr14 | 55643463 | 55643713 |
| chr14 | 55643713 | 55644005 |
| chr14 | 55659939 | 55660276 |
| chr14 | 55660276 | 55660679 |
| chr14 | 55660727 | 55660877 |
| chr14 | 55671578 | 55671786 |
| chr14 | 55671786 | 55672048 |
| chr14 | 55672048 | 55672471 |

|       |          |          |
|-------|----------|----------|
| chr14 | 55672517 | 55672687 |
| chr14 | 55681218 | 55681439 |
| chr14 | 55681439 | 55681733 |
| chr14 | 55681733 | 55682220 |
| chr14 | 55702448 | 55702725 |
| chr14 | 55702744 | 55703309 |
| chr14 | 55706254 | 55706597 |
| chr14 | 55709385 | 55709885 |
| chr14 | 55711122 | 55711343 |
| chr14 | 55713338 | 55713680 |
| chr14 | 55713848 | 55714147 |
| chr14 | 55714207 | 55714447 |
| chr14 | 55714817 | 55715367 |
| chr14 | 55715367 | 55715707 |
| chr14 | 55716925 | 55717150 |
| chr14 | 55721689 | 55722118 |
| chr14 | 55722118 | 55722432 |
| chr14 | 55724278 | 55724928 |
| chr14 | 55727864 | 55728226 |
| chr14 | 55730078 | 55730563 |
| chr14 | 55737725 | 55738010 |
| chr14 | 55743749 | 55744054 |
| chr14 | 55744889 | 55745206 |
| chr14 | 55745206 | 55745507 |
| chr14 | 55745507 | 55746025 |
| chr14 | 55758349 | 55758551 |
| chr14 | 55758567 | 55758849 |
| chr14 | 55760030 | 55760489 |
| chr14 | 55762162 | 55762420 |
| chr14 | 55767762 | 55768133 |
| chr14 | 55768133 | 55768506 |
| chr14 | 55768609 | 55768865 |
| chr14 | 55781141 | 55781731 |
| chr14 | 55795685 | 55796249 |
| chr14 | 55797177 | 55797448 |
| chr14 | 55804129 | 55804362 |
| chr14 | 55814934 | 55815204 |
| chr14 | 55815287 | 55815750 |
| chr14 | 55817645 | 55818181 |
| chr14 | 55822505 | 55822801 |
| chr14 | 55822904 | 55823234 |
| chr14 | 55823234 | 55823495 |



|       |          |          |
|-------|----------|----------|
| chr14 | 55823495 | 55823711 |
| chr14 | 55863836 | 55864109 |
| chr14 | 55873770 | 55874098 |
| chr14 | 55874098 | 55874395 |
| chr14 | 55874395 | 55874658 |
| chr14 | 55879716 | 55879875 |
| chr14 | 55882061 | 55882707 |
| chr14 | 55884743 | 55885404 |
| chr14 | 55899651 | 55899886 |
| chr14 | 55899886 | 55900108 |
| chr14 | 55900108 | 55900479 |
| chr14 | 55901497 | 55901697 |
| chr14 | 55903528 | 55904081 |
| chr14 | 55905596 | 55905807 |
| chr14 | 55905807 | 55905992 |
| chr14 | 55918357 | 55918533 |
| chr14 | 55918533 | 55918735 |
| chr14 | 55918740 | 55919014 |
| chr14 | 55923578 | 55923800 |
| chr14 | 55946343 | 55946592 |
| chr14 | 55946624 | 55946945 |
| chr14 | 55950336 | 55950691 |
| chr14 | 55997385 | 55997561 |
| chr14 | 55998092 | 55998292 |
| chr14 | 56013108 | 56013348 |
| chr14 | 56019537 | 56019766 |
| chr14 | 56034307 | 56034917 |
| chr14 | 56039862 | 56040080 |
| chr14 | 56043911 | 56044184 |
| chr14 | 56055430 | 56055597 |
| chr14 | 56057644 | 56058280 |
| chr14 | 56078233 | 56078812 |
| chr14 | 56084256 | 56084505 |
| chr14 | 56084977 | 56085250 |
| chr14 | 56085250 | 56085559 |
| chr14 | 56098993 | 56099268 |
| chr14 | 56120333 | 56120634 |
| chr14 | 56120634 | 56120938 |
| chr14 | 56120949 | 56121234 |
| chr14 | 56152130 | 56152525 |
| chr14 | 56155981 | 56156207 |
| chr14 | 56156449 | 56156622 |

|       |          |          |
|-------|----------|----------|
| chr14 | 56168018 | 56168291 |
| chr14 | 56171731 | 56171958 |
| chr14 | 56172029 | 56172237 |
| chr14 | 56186991 | 56187410 |
| chr14 | 56202092 | 56202250 |
| chr14 | 56205109 | 56205269 |
| chr14 | 56261988 | 56262173 |
| chr14 | 56262229 | 56262544 |
| chr14 | 56265553 | 56265853 |
| chr14 | 56304335 | 56304489 |
| chr14 | 56314481 | 56314704 |
| chr14 | 56352018 | 56352286 |
| chr14 | 56352313 | 56352608 |
| chr14 | 56364882 | 56365081 |
| chr14 | 56375799 | 56376078 |
| chr14 | 56468195 | 56468487 |
| chr14 | 56512236 | 56512435 |
| chr14 | 56571481 | 56572135 |
| chr14 | 56575421 | 56575895 |
| chr14 | 56581173 | 56581327 |
| chr14 | 56598845 | 56598998 |
| chr14 | 56667814 | 56668370 |
| chr14 | 56668370 | 56668768 |
| chr14 | 56689783 | 56690067 |
| chr14 | 56693925 | 56694156 |
| chr14 | 56708305 | 56708466 |
| chr14 | 56777360 | 56777545 |
| chr14 | 56777545 | 56777773 |
| chr14 | 56777773 | 56777984 |
| chr14 | 56777984 | 56778248 |
| chr14 | 56778248 | 56778533 |
| chr14 | 56778533 | 56778891 |
| chr14 | 56793315 | 56793558 |
| chr14 | 56811177 | 56811635 |
| chr14 | 56811635 | 56811990 |
| chr14 | 56811990 | 56812407 |
| chr14 | 56812407 | 56812742 |
| chr14 | 56812742 | 56812997 |
| chr14 | 56820546 | 56820719 |
| chr14 | 56832171 | 56832610 |
| chr14 | 56832662 | 56833072 |
| chr14 | 56833433 | 56833613 |

|       |          |          |
|-------|----------|----------|
| chr14 | 56875299 | 56875581 |
| chr14 | 56875581 | 56875806 |
| chr14 | 56875806 | 56876134 |
| chr14 | 56885335 | 56885545 |
| chr14 | 56885545 | 56885830 |
| chr14 | 56885859 | 56886287 |
| chr14 | 56886287 | 56886650 |
| chr14 | 56886650 | 56887142 |
| chr14 | 56887164 | 56887398 |
| chr14 | 56888017 | 56888197 |
| chr14 | 56895011 | 56895292 |
| chr14 | 56964458 | 56964609 |
| chr14 | 57016827 | 57017274 |
| chr14 | 57057602 | 57057791 |
| chr14 | 57057895 | 57058065 |
| chr14 | 57060079 | 57060367 |
| chr14 | 57067986 | 57068218 |
| chr14 | 57070012 | 57070241 |
| chr14 | 57093112 | 57093349 |
| chr14 | 57104104 | 57105030 |
| chr14 | 57107920 | 57108255 |
| chr14 | 57109346 | 57109496 |
| chr14 | 57122708 | 57122893 |
| chr14 | 57133224 | 57133487 |
| chr14 | 57138369 | 57138594 |
| chr14 | 57138594 | 57138854 |
| chr14 | 57138854 | 57139234 |
| chr14 | 57195421 | 57195696 |
| chr14 | 57197241 | 57197408 |
| chr14 | 57249861 | 57250074 |
| chr14 | 57251230 | 57251410 |
| chr14 | 57257939 | 57258097 |
| chr14 | 57266881 | 57267077 |
| chr14 | 57268318 | 57268735 |
| chr14 | 57268760 | 57268983 |
| chr14 | 57271968 | 57272120 |
| chr14 | 57274055 | 57274205 |
| chr14 | 57291325 | 57292083 |
| chr14 | 57297616 | 57298205 |
| chr14 | 57301971 | 57302121 |
| chr14 | 57316781 | 57317032 |
| chr14 | 57317042 | 57317695 |

|       |          |          |
|-------|----------|----------|
| chr14 | 57317890 | 57318159 |
| chr14 | 57318159 | 57318393 |
| chr14 | 57338711 | 57339008 |
| chr14 | 57339008 | 57339330 |
| chr14 | 57339367 | 57339608 |
| chr14 | 57348190 | 57348487 |
| chr14 | 57362827 | 57363085 |
| chr14 | 57372442 | 57372726 |
| chr14 | 57376760 | 57377253 |
| chr14 | 57385785 | 57385943 |
| chr14 | 57398162 | 57398750 |
| chr14 | 57398818 | 57399111 |
| chr14 | 57407436 | 57407732 |
| chr14 | 57423541 | 57423841 |
| chr14 | 57423841 | 57424198 |
| chr14 | 57424198 | 57424484 |
| chr14 | 57459889 | 57460178 |
| chr14 | 57524640 | 57524874 |
| chr14 | 57524874 | 57525280 |
| chr14 | 57525280 | 57525739 |
| chr14 | 57525739 | 57526120 |
| chr14 | 57533254 | 57533469 |
| chr14 | 57554689 | 57554962 |
| chr14 | 57571237 | 57571479 |
| chr14 | 57571479 | 57571780 |
| chr14 | 57607081 | 57607263 |
| chr14 | 57607369 | 57607883 |
| chr14 | 57619563 | 57619786 |
| chr14 | 57656511 | 57656764 |
| chr14 | 57656764 | 57656971 |
| chr14 | 57658438 | 57658596 |
| chr14 | 57664283 | 57664492 |
| chr14 | 57664492 | 57664654 |
| chr14 | 57664654 | 57664885 |
| chr14 | 57664885 | 57665515 |
| chr14 | 57679995 | 57680425 |
| chr14 | 57684658 | 57684910 |
| chr14 | 57684910 | 57685196 |
| chr14 | 57689155 | 57689329 |
| chr14 | 57695673 | 57695846 |
| chr14 | 57698056 | 57698270 |
| chr14 | 57702774 | 57703023 |

|       |          |          |
|-------|----------|----------|
| chr14 | 57704890 | 57705477 |
| chr14 | 57707145 | 57707305 |
| chr14 | 57709357 | 57709641 |
| chr14 | 57711438 | 57711859 |
| chr14 | 57711862 | 57712330 |
| chr14 | 57718141 | 57718349 |
| chr14 | 57718349 | 57718549 |
| chr14 | 57729805 | 57730222 |
| chr14 | 57730281 | 57731145 |
| chr14 | 57736648 | 57736923 |
| chr14 | 57736923 | 57737348 |
| chr14 | 57745403 | 57745783 |
| chr14 | 57745783 | 57746026 |
| chr14 | 57746026 | 57746303 |
| chr14 | 57746303 | 57746532 |
| chr14 | 57746532 | 57746732 |
| chr14 | 57749392 | 57749607 |
| chr14 | 57753763 | 57753940 |
| chr14 | 57759894 | 57760159 |
| chr14 | 57760229 | 57761133 |
| chr14 | 57762751 | 57762945 |
| chr14 | 57777351 | 57777675 |
| chr14 | 57777675 | 57778033 |
| chr14 | 57778044 | 57778194 |
| chr14 | 57791186 | 57791473 |
| chr14 | 57797478 | 57797747 |
| chr14 | 57797771 | 57798334 |
| chr14 | 57798334 | 57798567 |
| chr14 | 57798567 | 57798832 |
| chr14 | 57798832 | 57799035 |
| chr14 | 57808628 | 57808822 |
| chr14 | 57810760 | 57811008 |
| chr14 | 57811008 | 57811311 |
| chr14 | 57811311 | 57811568 |
| chr14 | 57825815 | 57826097 |
| chr14 | 57826097 | 57826448 |
| chr14 | 57826448 | 57826866 |
| chr14 | 57839706 | 57840342 |
| chr14 | 57840697 | 57840852 |
| chr14 | 57850404 | 57850911 |
| chr14 | 57850927 | 57851131 |
| chr14 | 57851137 | 57851398 |

|       |          |          |
|-------|----------|----------|
| chr14 | 57851936 | 57852319 |
| chr14 | 57852319 | 57852534 |
| chr14 | 57853074 | 57853271 |
| chr14 | 57881803 | 57882144 |
| chr14 | 57882799 | 57883032 |
| chr14 | 57883383 | 57883696 |
| chr14 | 57889532 | 57889728 |
| chr14 | 57889728 | 57889952 |
| chr14 | 57889952 | 57890230 |
| chr14 | 57890230 | 57890761 |
| chr14 | 57894359 | 57894625 |
| chr14 | 57896124 | 57896352 |
| chr14 | 57896958 | 57897219 |
| chr14 | 57910480 | 57911027 |
| chr14 | 57911923 | 57912272 |
| chr14 | 57912272 | 57912595 |
| chr14 | 57959367 | 57959740 |
| chr14 | 57980294 | 57980519 |
| chr14 | 57997586 | 57997774 |
| chr14 | 57998741 | 57999118 |
| chr14 | 57999118 | 57999597 |
| chr14 | 58019013 | 58019165 |
| chr14 | 58027984 | 58028269 |
| chr14 | 58029355 | 58029771 |
| chr14 | 58030087 | 58030455 |
| chr14 | 58037214 | 58037431 |
| chr14 | 58045870 | 58046125 |
| chr14 | 58046166 | 58046402 |
| chr14 | 58071070 | 58071254 |
| chr14 | 58071254 | 58071429 |
| chr14 | 58071700 | 58072030 |
| chr14 | 58072030 | 58072389 |
| chr14 | 58074972 | 58075138 |
| chr14 | 58075550 | 58075714 |
| chr14 | 58076313 | 58076576 |
| chr14 | 58096868 | 58097120 |
| chr14 | 58175695 | 58175880 |
| chr14 | 58183059 | 58183248 |
| chr14 | 58189894 | 58190367 |
| chr14 | 58253321 | 58253663 |
| chr14 | 58253663 | 58254040 |
| chr14 | 58281857 | 58282266 |

|       |          |          |
|-------|----------|----------|
| chr14 | 58306674 | 58307044 |
| chr14 | 58308717 | 58309198 |
| chr14 | 58324237 | 58324498 |
| chr14 | 58343354 | 58343744 |
| chr14 | 58445768 | 58445971 |
| chr14 | 58487946 | 58488126 |
| chr14 | 58658650 | 58658836 |
| chr14 | 59025891 | 59026058 |
| chr14 | 59116111 | 59116605 |
| chr14 | 59200821 | 59201196 |
| chr14 | 59201196 | 59201533 |
| chr14 | 59201533 | 59201843 |
| chr14 | 59330574 | 59330804 |
| chr14 | 59440415 | 59441366 |
| chr14 | 59463555 | 59463881 |
| chr14 | 59467907 | 59468068 |
| chr14 | 59470882 | 59471202 |
| chr14 | 59478687 | 59478932 |
| chr14 | 59547686 | 59548070 |
| chr14 | 59550929 | 59551197 |
| chr14 | 59551438 | 59551627 |
| chr14 | 59551929 | 59552435 |
| chr14 | 59552435 | 59552849 |
| chr14 | 59569452 | 59569603 |
| chr14 | 59571912 | 59572175 |
| chr14 | 59572175 | 59572416 |
| chr14 | 59573418 | 59573643 |
| chr14 | 59573965 | 59574209 |
| chr14 | 59588039 | 59588244 |
| chr14 | 59590671 | 59590914 |
| chr14 | 59597359 | 59597739 |
| chr14 | 59597739 | 59598074 |
| chr14 | 59598074 | 59598311 |
| chr14 | 59604080 | 59604294 |
| chr14 | 59605792 | 59605987 |
| chr14 | 59609516 | 59609668 |
| chr14 | 59625138 | 59625396 |
| chr14 | 59625399 | 59625730 |
| chr14 | 59994959 | 59995182 |
| chr14 | 60015994 | 60016216 |
| chr14 | 60059711 | 60059896 |
| chr14 | 60086790 | 60087040 |

|       |          |          |
|-------|----------|----------|
| chr14 | 60163516 | 60163689 |
| chr14 | 60176836 | 60177413 |
| chr14 | 60177413 | 60177779 |
| chr14 | 60188310 | 60188470 |
| chr14 | 60188519 | 60188748 |
| chr14 | 60240172 | 60240521 |
| chr14 | 60245342 | 60245613 |
| chr14 | 60250894 | 60251272 |
| chr14 | 60251272 | 60251717 |
| chr14 | 60251717 | 60252005 |
| chr14 | 60252005 | 60252222 |
| chr14 | 60264922 | 60265455 |
| chr14 | 60265455 | 60265778 |
| chr14 | 60286274 | 60286464 |
| chr14 | 60286591 | 60286741 |
| chr14 | 60318746 | 60318915 |
| chr14 | 60372123 | 60372335 |
| chr14 | 60378100 | 60378417 |
| chr14 | 60378514 | 60378782 |
| chr14 | 60378782 | 60379078 |
| chr14 | 60379078 | 60379283 |
| chr14 | 60409592 | 60409931 |
| chr14 | 60409931 | 60410242 |
| chr14 | 60418044 | 60418368 |
| chr14 | 60418903 | 60419315 |
| chr14 | 60425680 | 60425866 |
| chr14 | 60427948 | 60428439 |
| chr14 | 60428439 | 60429012 |
| chr14 | 60430323 | 60430528 |
| chr14 | 60431824 | 60432252 |
| chr14 | 60432252 | 60432625 |
| chr14 | 60435640 | 60435843 |
| chr14 | 60485189 | 60485343 |
| chr14 | 60485354 | 60485542 |
| chr14 | 60485545 | 60485933 |
| chr14 | 60485942 | 60486235 |
| chr14 | 60486589 | 60486863 |
| chr14 | 60525369 | 60525616 |
| chr14 | 60526841 | 60527168 |
| chr14 | 60529084 | 60529534 |
| chr14 | 60529882 | 60530269 |
| chr14 | 60541279 | 60541594 |



|       |          |          |
|-------|----------|----------|
| chr14 | 60541594 | 60542030 |
| chr14 | 60569810 | 60570024 |
| chr14 | 60572512 | 60572791 |
| chr14 | 60572887 | 60573037 |
| chr14 | 60592905 | 60593215 |
| chr14 | 60593218 | 60593392 |
| chr14 | 60606229 | 60606618 |
| chr14 | 60621042 | 60621367 |
| chr14 | 60621367 | 60621607 |
| chr14 | 60634002 | 60634287 |
| chr14 | 60634287 | 60634567 |
| chr14 | 60634567 | 60634860 |
| chr14 | 60634860 | 60635287 |
| chr14 | 60657944 | 60658227 |
| chr14 | 60667500 | 60667716 |
| chr14 | 60668036 | 60668252 |
| chr14 | 60688865 | 60689105 |
| chr14 | 60694750 | 60694900 |
| chr14 | 60697330 | 60697801 |
| chr14 | 60712537 | 60712908 |
| chr14 | 60726080 | 60726486 |
| chr14 | 60726486 | 60726814 |
| chr14 | 60732760 | 60733205 |
| chr14 | 60736564 | 60736807 |
| chr14 | 60736807 | 60737066 |
| chr14 | 60740579 | 60740800 |
| chr14 | 60741057 | 60741334 |
| chr14 | 60741519 | 60741789 |
| chr14 | 60741789 | 60742215 |
| chr14 | 60759947 | 60760462 |
| chr14 | 60765077 | 60765273 |
| chr14 | 60771010 | 60771240 |
| chr14 | 60771240 | 60771488 |
| chr14 | 60784380 | 60784699 |
| chr14 | 60784699 | 60784985 |
| chr14 | 60784985 | 60785237 |
| chr14 | 60790194 | 60790449 |
| chr14 | 60935631 | 60935935 |
| chr14 | 60947056 | 60947444 |
| chr14 | 60993154 | 60993463 |
| chr14 | 60993496 | 60993885 |
| chr14 | 61037866 | 61038072 |

|       |          |          |
|-------|----------|----------|
| chr14 | 61046397 | 61046758 |
| chr14 | 61060454 | 61060607 |
| chr14 | 61108728 | 61108900 |
| chr14 | 61112563 | 61112723 |
| chr14 | 61144006 | 61144156 |
| chr14 | 61171461 | 61171894 |
| chr14 | 61172453 | 61173214 |
| chr14 | 61173214 | 61173621 |
| chr14 | 61238788 | 61239188 |
| chr14 | 61261849 | 61262010 |
| chr14 | 61294491 | 61294711 |
| chr14 | 61294801 | 61294957 |
| chr14 | 61302479 | 61303067 |
| chr14 | 61303369 | 61303631 |
| chr14 | 61305240 | 61305449 |
| chr14 | 61309628 | 61309914 |
| chr14 | 61310100 | 61310413 |
| chr14 | 61310413 | 61310731 |
| chr14 | 61310878 | 61311051 |
| chr14 | 61316915 | 61317334 |
| chr14 | 61324596 | 61324860 |
| chr14 | 61327089 | 61327310 |
| chr14 | 61327765 | 61327947 |
| chr14 | 61328052 | 61328202 |
| chr14 | 61331162 | 61331367 |
| chr14 | 61331367 | 61331658 |
| chr14 | 61354997 | 61355155 |
| chr14 | 61360043 | 61360591 |
| chr14 | 61360652 | 61360825 |
| chr14 | 61421328 | 61421483 |
| chr14 | 61439188 | 61439453 |
| chr14 | 61439453 | 61439851 |
| chr14 | 61439851 | 61440388 |
| chr14 | 61447759 | 61448312 |
| chr14 | 61452599 | 61452803 |
| chr14 | 61468902 | 61469152 |
| chr14 | 61471724 | 61471971 |
| chr14 | 61472886 | 61473081 |
| chr14 | 61473663 | 61473846 |
| chr14 | 61479692 | 61479849 |
| chr14 | 61484070 | 61484232 |
| chr14 | 61498098 | 61498286 |

|       |          |          |
|-------|----------|----------|
| chr14 | 61498286 | 61498545 |
| chr14 | 61510388 | 61510592 |
| chr14 | 61530383 | 61530799 |
| chr14 | 61556083 | 61556623 |
| chr14 | 61556623 | 61556934 |
| chr14 | 61556934 | 61557294 |
| chr14 | 61559954 | 61560136 |
| chr14 | 61571463 | 61571665 |
| chr14 | 61599367 | 61599840 |
| chr14 | 61647966 | 61648251 |
| chr14 | 61648251 | 61648608 |
| chr14 | 61648608 | 61649045 |
| chr14 | 61649045 | 61649445 |
| chr14 | 61680785 | 61681280 |
| chr14 | 61681280 | 61681750 |
| chr14 | 61682077 | 61682347 |
| chr14 | 61682347 | 61682652 |
| chr14 | 61682652 | 61683085 |
| chr14 | 61686889 | 61687086 |
| chr14 | 61687204 | 61687354 |
| chr14 | 61706522 | 61706727 |
| chr14 | 61723666 | 61724022 |
| chr14 | 61737499 | 61738045 |
| chr14 | 61739518 | 61739836 |
| chr14 | 61739860 | 61740010 |
| chr14 | 61744138 | 61744339 |
| chr14 | 61751806 | 61752090 |
| chr14 | 61757122 | 61757413 |
| chr14 | 61757413 | 61757819 |
| chr14 | 61758647 | 61758902 |
| chr14 | 61770618 | 61770965 |
| chr14 | 61773931 | 61774085 |
| chr14 | 61774792 | 61775168 |
| chr14 | 61775801 | 61775987 |
| chr14 | 61797343 | 61797562 |
| chr14 | 61809363 | 61809587 |
| chr14 | 61825209 | 61825415 |
| chr14 | 61863425 | 61863890 |
| chr14 | 61863890 | 61864258 |
| chr14 | 61880564 | 61880910 |
| chr14 | 61880910 | 61881340 |
| chr14 | 61930919 | 61931069 |

|       |          |          |
|-------|----------|----------|
| chr14 | 62023095 | 62023423 |
| chr14 | 62170416 | 62170696 |
| chr14 | 62252093 | 62252334 |
| chr14 | 62300037 | 62300274 |
| chr14 | 62331909 | 62332216 |
| chr14 | 62332216 | 62332460 |
| chr14 | 62332460 | 62332764 |
| chr14 | 62339288 | 62339444 |
| chr14 | 62353406 | 62353697 |
| chr14 | 62353711 | 62354190 |
| chr14 | 62361491 | 62361771 |
| chr14 | 62370933 | 62371164 |
| chr14 | 62389568 | 62389723 |
| chr14 | 62443786 | 62443975 |
| chr14 | 62446144 | 62446304 |
| chr14 | 62446371 | 62446797 |
| chr14 | 62454308 | 62454584 |
| chr14 | 62457494 | 62457784 |
| chr14 | 62489285 | 62489478 |
| chr14 | 62492515 | 62492800 |
| chr14 | 62493719 | 62493996 |
| chr14 | 62506709 | 62507032 |
| chr14 | 62509099 | 62509449 |
| chr14 | 62509449 | 62509785 |
| chr14 | 62512946 | 62513104 |
| chr14 | 62530785 | 62531267 |
| chr14 | 62531267 | 62531569 |
| chr14 | 62533841 | 62534091 |
| chr14 | 62555302 | 62556223 |
| chr14 | 62556226 | 62556389 |
| chr14 | 62580990 | 62581286 |
| chr14 | 62627400 | 62627552 |
| chr14 | 62638202 | 62638381 |
| chr14 | 62641973 | 62642169 |
| chr14 | 62730482 | 62730636 |
| chr14 | 62759856 | 62760064 |
| chr14 | 62760064 | 62760290 |
| chr14 | 62760290 | 62760521 |
| chr14 | 62760521 | 62760958 |
| chr14 | 62760958 | 62761382 |
| chr14 | 62761382 | 62761855 |
| chr14 | 62774377 | 62774617 |

|       |          |          |
|-------|----------|----------|
| chr14 | 62775014 | 62775381 |
| chr14 | 62775381 | 62775624 |
| chr14 | 62784642 | 62784997 |
| chr14 | 62785875 | 62786148 |
| chr14 | 62786710 | 62786945 |
| chr14 | 62787506 | 62787829 |
| chr14 | 62796586 | 62796747 |
| chr14 | 62798585 | 62799124 |
| chr14 | 62806372 | 62806647 |
| chr14 | 62806689 | 62806907 |
| chr14 | 62806907 | 62807119 |
| chr14 | 62807119 | 62807397 |
| chr14 | 62812760 | 62813121 |
| chr14 | 62814556 | 62814885 |
| chr14 | 62825419 | 62825943 |
| chr14 | 62825943 | 62826292 |
| chr14 | 62837088 | 62837441 |
| chr14 | 62837441 | 62837866 |
| chr14 | 62837866 | 62838270 |
| chr14 | 62843225 | 62843400 |
| chr14 | 62855178 | 62855375 |
| chr14 | 62858459 | 62858609 |
| chr14 | 62870492 | 62870708 |
| chr14 | 62872096 | 62872393 |
| chr14 | 62879475 | 62879924 |
| chr14 | 62880030 | 62880306 |
| chr14 | 62880306 | 62880805 |
| chr14 | 62885274 | 62885439 |
| chr14 | 62888348 | 62888498 |
| chr14 | 62949997 | 62950242 |
| chr14 | 62957360 | 62957707 |
| chr14 | 62957707 | 62957989 |
| chr14 | 62987532 | 62987707 |
| chr14 | 62987750 | 62988134 |
| chr14 | 62991260 | 62991609 |
| chr14 | 62991769 | 62992231 |
| chr14 | 62992243 | 62992498 |
| chr14 | 63013225 | 63013416 |
| chr14 | 63013931 | 63014222 |
| chr14 | 63014744 | 63015072 |
| chr14 | 63020752 | 63021155 |
| chr14 | 63054743 | 63055058 |

|       |          |          |
|-------|----------|----------|
| chr14 | 63066642 | 63066855 |
| chr14 | 63067008 | 63067227 |
| chr14 | 63073270 | 63073542 |
| chr14 | 63076203 | 63076692 |
| chr14 | 63088537 | 63088814 |
| chr14 | 63093677 | 63094027 |
| chr14 | 63102911 | 63103454 |
| chr14 | 63103863 | 63104119 |
| chr14 | 63104218 | 63104420 |
| chr14 | 63111709 | 63112147 |
| chr14 | 63112147 | 63112689 |
| chr14 | 63119543 | 63119931 |
| chr14 | 63122309 | 63122678 |
| chr14 | 63122678 | 63123016 |
| chr14 | 63123074 | 63123342 |
| chr14 | 63123555 | 63123711 |
| chr14 | 63123791 | 63124066 |
| chr14 | 63130527 | 63130984 |
| chr14 | 63131737 | 63132019 |
| chr14 | 63132251 | 63132818 |
| chr14 | 63141279 | 63141446 |
| chr14 | 63141910 | 63142199 |
| chr14 | 63142488 | 63142656 |
| chr14 | 63148578 | 63149084 |
| chr14 | 63155471 | 63155730 |
| chr14 | 63156145 | 63156322 |
| chr14 | 63157615 | 63157765 |
| chr14 | 63164276 | 63164713 |
| chr14 | 63164713 | 63165216 |
| chr14 | 63165249 | 63165461 |
| chr14 | 63165611 | 63165766 |
| chr14 | 63172479 | 63172813 |
| chr14 | 63177504 | 63177789 |
| chr14 | 63177789 | 63178460 |
| chr14 | 63185487 | 63185744 |
| chr14 | 63185860 | 63186161 |
| chr14 | 63193659 | 63193990 |
| chr14 | 63195044 | 63195609 |
| chr14 | 63195845 | 63196103 |
| chr14 | 63207170 | 63207414 |
| chr14 | 63217256 | 63217555 |
| chr14 | 63222245 | 63222465 |

|       |          |          |
|-------|----------|----------|
| chr14 | 63242981 | 63243133 |
| chr14 | 63245178 | 63245712 |
| chr14 | 63255652 | 63255897 |
| chr14 | 63255977 | 63256238 |
| chr14 | 63280508 | 63280728 |
| chr14 | 63281820 | 63282235 |
| chr14 | 63308816 | 63309402 |
| chr14 | 63312163 | 63312459 |
| chr14 | 63347953 | 63348321 |
| chr14 | 63363699 | 63363895 |
| chr14 | 63371858 | 63372032 |
| chr14 | 63372562 | 63372836 |
| chr14 | 63373439 | 63373736 |
| chr14 | 63381906 | 63382187 |
| chr14 | 63409000 | 63409153 |
| chr14 | 63409231 | 63409593 |
| chr14 | 63409664 | 63409914 |
| chr14 | 63422245 | 63422395 |
| chr14 | 63422645 | 63423050 |
| chr14 | 63427413 | 63427656 |
| chr14 | 63427656 | 63428145 |
| chr14 | 63435312 | 63435666 |
| chr14 | 63435899 | 63436284 |
| chr14 | 63436284 | 63436821 |
| chr14 | 63443062 | 63443259 |
| chr14 | 63447270 | 63447435 |
| chr14 | 63447635 | 63447987 |
| chr14 | 63447987 | 63448318 |
| chr14 | 63448656 | 63449010 |
| chr14 | 63451136 | 63451634 |
| chr14 | 63453151 | 63453329 |
| chr14 | 63453470 | 63453642 |
| chr14 | 63454229 | 63454714 |
| chr14 | 63460776 | 63461273 |
| chr14 | 63466953 | 63467929 |
| chr14 | 63471165 | 63471323 |
| chr14 | 63488640 | 63488996 |
| chr14 | 63535028 | 63535256 |
| chr14 | 63543286 | 63543859 |
| chr14 | 63543859 | 63544183 |
| chr14 | 63544186 | 63544337 |
| chr14 | 63577101 | 63577271 |

|       |          |          |
|-------|----------|----------|
| chr14 | 63581321 | 63581583 |
| chr14 | 63605861 | 63606169 |
| chr14 | 63606169 | 63606525 |
| chr14 | 63606525 | 63606852 |
| chr14 | 63606852 | 63607132 |
| chr14 | 63607200 | 63607476 |
| chr14 | 63612513 | 63612745 |
| chr14 | 63624402 | 63624552 |
| chr14 | 63638394 | 63638703 |
| chr14 | 63653131 | 63653330 |
| chr14 | 63681523 | 63681887 |
| chr14 | 63741340 | 63741665 |
| chr14 | 63759860 | 63760110 |
| chr14 | 63777384 | 63777758 |
| chr14 | 63777758 | 63778117 |
| chr14 | 63795195 | 63795516 |
| chr14 | 63813533 | 63813711 |
| chr14 | 63859949 | 63860164 |
| chr14 | 63860164 | 63860412 |
| chr14 | 63860412 | 63860796 |
| chr14 | 63860800 | 63861069 |
| chr14 | 63867824 | 63868117 |
| chr14 | 63868511 | 63868676 |
| chr14 | 63872935 | 63873179 |
| chr14 | 63891875 | 63892117 |
| chr14 | 63893529 | 63893824 |
| chr14 | 63899487 | 63900004 |
| chr14 | 63905775 | 63905976 |
| chr14 | 63910353 | 63910536 |
| chr14 | 63925672 | 63925942 |
| chr14 | 63940753 | 63941089 |
| chr14 | 63943309 | 63943733 |
| chr14 | 63943733 | 63944061 |
| chr14 | 63954173 | 63954438 |
| chr14 | 63961388 | 63961556 |
| chr14 | 63962560 | 63963128 |
| chr14 | 63963700 | 63963970 |
| chr14 | 63968899 | 63969108 |
| chr14 | 63982337 | 63982786 |
| chr14 | 63982836 | 63983678 |
| chr14 | 63993312 | 63993764 |
| chr14 | 63994036 | 63994275 |



|       |          |          |
|-------|----------|----------|
| chr14 | 63994275 | 63994575 |
| chr14 | 63994636 | 63994906 |
| chr14 | 63995605 | 63995755 |
| chr14 | 63997669 | 63998051 |
| chr14 | 64006427 | 64006601 |
| chr14 | 64011286 | 64011485 |
| chr14 | 64011615 | 64012042 |
| chr14 | 64012042 | 64012555 |
| chr14 | 64038503 | 64038663 |
| chr14 | 64038911 | 64039321 |
| chr14 | 64047521 | 64047736 |
| chr14 | 64048519 | 64048671 |
| chr14 | 64049228 | 64049528 |
| chr14 | 64069997 | 64070199 |
| chr14 | 64070636 | 64070848 |
| chr14 | 64070848 | 64071097 |
| chr14 | 64071107 | 64071349 |
| chr14 | 64089843 | 64090517 |
| chr14 | 64097024 | 64097281 |
| chr14 | 64097546 | 64097872 |
| chr14 | 64098247 | 64098486 |
| chr14 | 64098853 | 64099189 |
| chr14 | 64099189 | 64099485 |
| chr14 | 64101164 | 64101386 |
| chr14 | 64103841 | 64104294 |
| chr14 | 64104294 | 64104609 |
| chr14 | 64125886 | 64126144 |
| chr14 | 64126147 | 64126354 |
| chr14 | 64153165 | 64153456 |
| chr14 | 64252604 | 64252840 |
| chr14 | 64261562 | 64261808 |
| chr14 | 64299821 | 64300038 |
| chr14 | 64300998 | 64301200 |
| chr14 | 64311730 | 64312003 |
| chr14 | 64327518 | 64327834 |
| chr14 | 64349956 | 64350409 |
| chr14 | 64368248 | 64368664 |
| chr14 | 64373512 | 64373787 |
| chr14 | 64440008 | 64440240 |
| chr14 | 64440267 | 64441189 |
| chr14 | 64453951 | 64454101 |
| chr14 | 64467312 | 64467505 |

|       |          |          |
|-------|----------|----------|
| chr14 | 64574449 | 64574602 |
| chr14 | 64587294 | 64587459 |
| chr14 | 64626046 | 64626196 |
| chr14 | 64627105 | 64627365 |
| chr14 | 64632874 | 64633705 |
| chr14 | 64638979 | 64639205 |
| chr14 | 64639564 | 64639899 |
| chr14 | 64639899 | 64640201 |
| chr14 | 64650665 | 64651004 |
| chr14 | 64652306 | 64652644 |
| chr14 | 64652644 | 64652978 |
| chr14 | 64656933 | 64657191 |
| chr14 | 64659697 | 64660023 |
| chr14 | 64660101 | 64660373 |
| chr14 | 64663949 | 64664541 |
| chr14 | 64665228 | 64665401 |
| chr14 | 64665901 | 64666184 |
| chr14 | 64666663 | 64667000 |
| chr14 | 64690155 | 64690493 |
| chr14 | 64744152 | 64744501 |
| chr14 | 64752808 | 64752971 |
| chr14 | 64765839 | 64766133 |
| chr14 | 64796952 | 64797270 |
| chr14 | 64810754 | 64811000 |
| chr14 | 64828461 | 64828614 |
| chr14 | 64865538 | 64865754 |
| chr14 | 64866650 | 64866828 |
| chr14 | 64876494 | 64876654 |
| chr14 | 64878901 | 64879051 |
| chr14 | 64885008 | 64885280 |
| chr14 | 64885352 | 64885639 |
| chr14 | 64902925 | 64903351 |
| chr14 | 64913960 | 64914303 |
| chr14 | 64914332 | 64914571 |
| chr14 | 64923363 | 64923591 |
| chr14 | 64923694 | 64924237 |
| chr14 | 64924604 | 64924769 |
| chr14 | 64949096 | 64949246 |
| chr14 | 64949566 | 64949818 |
| chr14 | 64949818 | 64950114 |
| chr14 | 64950114 | 64950394 |
| chr14 | 64959565 | 64960033 |

|       |          |          |
|-------|----------|----------|
| chr14 | 64960863 | 64961077 |
| chr14 | 64963585 | 64963930 |
| chr14 | 64965971 | 64966245 |
| chr14 | 64979620 | 64980065 |
| chr14 | 65026253 | 65026461 |
| chr14 | 65030195 | 65030355 |
| chr14 | 65035838 | 65036020 |
| chr14 | 65069338 | 65069574 |
| chr14 | 65097398 | 65097770 |
| chr14 | 65097770 | 65097991 |
| chr14 | 65097991 | 65098496 |
| chr14 | 65106557 | 65107006 |
| chr14 | 65112771 | 65112984 |
| chr14 | 65112984 | 65113151 |
| chr14 | 65113547 | 65114050 |
| chr14 | 65114077 | 65114350 |
| chr14 | 65126721 | 65127041 |
| chr14 | 65140489 | 65140712 |
| chr14 | 65149447 | 65149840 |
| chr14 | 65149840 | 65150313 |
| chr14 | 65163746 | 65164047 |
| chr14 | 65170131 | 65170288 |
| chr14 | 65245517 | 65245760 |
| chr14 | 65261847 | 65262634 |
| chr14 | 65262634 | 65262906 |
| chr14 | 65264586 | 65264836 |
| chr14 | 65326651 | 65326881 |
| chr14 | 65327988 | 65328267 |
| chr14 | 65331822 | 65332285 |
| chr14 | 65343197 | 65343622 |
| chr14 | 65343622 | 65344295 |
| chr14 | 65345513 | 65345827 |
| chr14 | 65348341 | 65348565 |
| chr14 | 65358032 | 65358202 |
| chr14 | 65358233 | 65358828 |
| chr14 | 65358828 | 65359294 |
| chr14 | 65374574 | 65375174 |
| chr14 | 65375174 | 65375493 |
| chr14 | 65380541 | 65380813 |
| chr14 | 65381663 | 65381916 |
| chr14 | 65389856 | 65390017 |
| chr14 | 65416891 | 65417115 |

|       |          |          |
|-------|----------|----------|
| chr14 | 65451490 | 65451739 |
| chr14 | 65451810 | 65452231 |
| chr14 | 65490176 | 65490618 |
| chr14 | 65517216 | 65517454 |
| chr14 | 65522738 | 65523089 |
| chr14 | 65529993 | 65530157 |
| chr14 | 65538623 | 65538935 |
| chr14 | 65540098 | 65540576 |
| chr14 | 65540995 | 65541171 |
| chr14 | 65541734 | 65542065 |
| chr14 | 65549331 | 65549545 |
| chr14 | 65590762 | 65590940 |
| chr14 | 65592775 | 65593282 |
| chr14 | 65593297 | 65593480 |
| chr14 | 65611760 | 65612108 |
| chr14 | 65657854 | 65658041 |
| chr14 | 65666194 | 65666505 |
| chr14 | 65676307 | 65676531 |
| chr14 | 65742186 | 65742613 |
| chr14 | 65742613 | 65743074 |
| chr14 | 65744232 | 65744369 |
| chr14 | 65744369 | 65744526 |
| chr14 | 65761927 | 65762412 |
| chr14 | 65774976 | 65775197 |
| chr14 | 65777852 | 65778195 |
| chr14 | 65783036 | 65783321 |
| chr14 | 65795884 | 65796035 |
| chr14 | 65801011 | 65801182 |
| chr14 | 65804526 | 65804678 |
| chr14 | 65805720 | 65805984 |
| chr14 | 65805984 | 65806162 |
| chr14 | 65806162 | 65806388 |
| chr14 | 65806388 | 65806663 |
| chr14 | 65833333 | 65833585 |
| chr14 | 65833585 | 65833848 |
| chr14 | 65833848 | 65834260 |
| chr14 | 65837214 | 65837464 |
| chr14 | 65837512 | 65837672 |
| chr14 | 65837680 | 65838031 |
| chr14 | 65844367 | 65844529 |
| chr14 | 65849198 | 65849520 |
| chr14 | 65850871 | 65851065 |

|       |          |          |
|-------|----------|----------|
| chr14 | 65851065 | 65851186 |
| chr14 | 65851189 | 65851624 |
| chr14 | 65859140 | 65859465 |
| chr14 | 65859465 | 65859722 |
| chr14 | 65863034 | 65863447 |
| chr14 | 65867412 | 65867636 |
| chr14 | 65869420 | 65869699 |
| chr14 | 65871473 | 65871715 |
| chr14 | 65875200 | 65875719 |
| chr14 | 65876250 | 65876560 |
| chr14 | 65878654 | 65879241 |
| chr14 | 65881364 | 65881916 |
| chr14 | 65883241 | 65883632 |
| chr14 | 65889005 | 65889184 |
| chr14 | 65890107 | 65890523 |
| chr14 | 65890523 | 65891077 |
| chr14 | 65900155 | 65900563 |
| chr14 | 65900563 | 65901062 |
| chr14 | 65907260 | 65907855 |
| chr14 | 65907998 | 65908159 |
| chr14 | 65914422 | 65914679 |
| chr14 | 65915387 | 65915844 |
| chr14 | 65916117 | 65916365 |
| chr14 | 65924344 | 65924611 |
| chr14 | 65925725 | 65925995 |
| chr14 | 65952935 | 65953100 |
| chr14 | 65953357 | 65953665 |
| chr14 | 65953665 | 65953921 |
| chr14 | 65953921 | 65954174 |
| chr14 | 65965574 | 65965724 |
| chr14 | 65968325 | 65968899 |
| chr14 | 65968932 | 65969186 |
| chr14 | 65976976 | 65977170 |
| chr14 | 65980766 | 65980933 |
| chr14 | 65981849 | 65982090 |
| chr14 | 65982195 | 65982487 |
| chr14 | 65982500 | 65982931 |
| chr14 | 65982931 | 65983155 |
| chr14 | 65984168 | 65984311 |
| chr14 | 65984311 | 65984485 |
| chr14 | 65984772 | 65985032 |
| chr14 | 65987968 | 65988239 |

|       |          |          |
|-------|----------|----------|
| chr14 | 65999869 | 66000122 |
| chr14 | 66028321 | 66028516 |
| chr14 | 66044905 | 66045094 |
| chr14 | 66061468 | 66061708 |
| chr14 | 66090872 | 66091027 |
| chr14 | 66091243 | 66091619 |
| chr14 | 66095203 | 66095448 |
| chr14 | 66105043 | 66105508 |
| chr14 | 66105944 | 66106348 |
| chr14 | 66106348 | 66106676 |
| chr14 | 66124256 | 66124683 |
| chr14 | 66139315 | 66139592 |
| chr14 | 66139592 | 66139917 |
| chr14 | 66139917 | 66140195 |
| chr14 | 66144239 | 66144544 |
| chr14 | 66147317 | 66147539 |
| chr14 | 66147560 | 66147923 |
| chr14 | 66175723 | 66176012 |
| chr14 | 66182734 | 66183188 |
| chr14 | 66184947 | 66185133 |
| chr14 | 66189338 | 66189528 |
| chr14 | 66190499 | 66190742 |
| chr14 | 66199945 | 66200150 |
| chr14 | 66220937 | 66221395 |
| chr14 | 66223727 | 66223991 |
| chr14 | 66224966 | 66225232 |
| chr14 | 66225232 | 66225471 |
| chr14 | 66235289 | 66235552 |
| chr14 | 66235699 | 66235853 |
| chr14 | 66244218 | 66244447 |
| chr14 | 66244447 | 66244848 |
| chr14 | 66257507 | 66258062 |
| chr14 | 66258780 | 66259306 |
| chr14 | 66260592 | 66260835 |
| chr14 | 66261954 | 66262204 |
| chr14 | 66263032 | 66263239 |
| chr14 | 66264484 | 66264646 |
| chr14 | 66264663 | 66265034 |
| chr14 | 66266298 | 66266606 |
| chr14 | 66266620 | 66266813 |
| chr14 | 66273757 | 66274012 |
| chr14 | 66276955 | 66277300 |

|       |          |          |
|-------|----------|----------|
| chr14 | 66278672 | 66279007 |
| chr14 | 66279126 | 66279276 |
| chr14 | 66279349 | 66279620 |
| chr14 | 66279620 | 66279866 |
| chr14 | 66280371 | 66280521 |
| chr14 | 66280623 | 66280773 |
| chr14 | 66280823 | 66281172 |
| chr14 | 66282701 | 66282964 |
| chr14 | 66296546 | 66296830 |
| chr14 | 66296830 | 66297163 |
| chr14 | 66297163 | 66297639 |
| chr14 | 66299635 | 66299791 |
| chr14 | 66307124 | 66307362 |
| chr14 | 66319969 | 66320216 |
| chr14 | 66320216 | 66320419 |
| chr14 | 66329954 | 66330139 |
| chr14 | 66340557 | 66340800 |
| chr14 | 66340800 | 66341123 |
| chr14 | 66341123 | 66341618 |
| chr14 | 66342095 | 66342283 |
| chr14 | 66344888 | 66345049 |
| chr14 | 66348054 | 66348266 |
| chr14 | 66348285 | 66348777 |
| chr14 | 66358751 | 66358901 |
| chr14 | 66380134 | 66380299 |
| chr14 | 66475200 | 66475352 |
| chr14 | 66494726 | 66494957 |
| chr14 | 66561777 | 66561974 |
| chr14 | 66600148 | 66600351 |
| chr14 | 66631108 | 66631367 |
| chr14 | 66672605 | 66672873 |
| chr14 | 66775775 | 66775934 |
| chr14 | 66783024 | 66783179 |
| chr14 | 66784997 | 66785208 |
| chr14 | 66791825 | 66792106 |
| chr14 | 66796732 | 66797031 |
| chr14 | 66802034 | 66802254 |
| chr14 | 66811047 | 66811287 |
| chr14 | 66834246 | 66834840 |
| chr14 | 66845665 | 66845874 |
| chr14 | 66846371 | 66846780 |
| chr14 | 66847653 | 66847830 |

|       |          |          |
|-------|----------|----------|
| chr14 | 66847830 | 66847978 |
| chr14 | 66858298 | 66858448 |
| chr14 | 66868534 | 66868952 |
| chr14 | 66868952 | 66869376 |
| chr14 | 66873431 | 66873668 |
| chr14 | 66909762 | 66910043 |
| chr14 | 66910818 | 66910993 |
| chr14 | 66910993 | 66911223 |
| chr14 | 66953163 | 66953460 |
| chr14 | 66955376 | 66955642 |
| chr14 | 66958961 | 66959113 |
| chr14 | 66964091 | 66964388 |
| chr14 | 66973020 | 66973521 |
| chr14 | 66974283 | 66974829 |
| chr14 | 66976970 | 66977619 |
| chr14 | 66990739 | 66990925 |
| chr14 | 66998257 | 66998420 |
| chr14 | 66998686 | 66998999 |
| chr14 | 66999469 | 66999892 |
| chr14 | 67001126 | 67001286 |
| chr14 | 67008188 | 67008421 |
| chr14 | 67008421 | 67008773 |
| chr14 | 67008773 | 67009322 |
| chr14 | 67017901 | 67018088 |
| chr14 | 67020479 | 67020786 |
| chr14 | 67045579 | 67045798 |
| chr14 | 67046772 | 67046967 |
| chr14 | 67046967 | 67047157 |
| chr14 | 67047157 | 67047350 |
| chr14 | 67047778 | 67048184 |
| chr14 | 67048940 | 67049102 |
| chr14 | 67050512 | 67050793 |
| chr14 | 67051096 | 67051347 |
| chr14 | 67053809 | 67053959 |
| chr14 | 67061057 | 67061247 |
| chr14 | 67070676 | 67070976 |
| chr14 | 67071744 | 67072118 |
| chr14 | 67072118 | 67072405 |
| chr14 | 67072405 | 67072830 |
| chr14 | 67097850 | 67098388 |
| chr14 | 67098388 | 67098588 |
| chr14 | 67100227 | 67100489 |



|       |          |          |
|-------|----------|----------|
| chr14 | 67100700 | 67100976 |
| chr14 | 67101448 | 67101598 |
| chr14 | 67108301 | 67108739 |
| chr14 | 67109018 | 67109353 |
| chr14 | 67118926 | 67119140 |
| chr14 | 67120344 | 67120846 |
| chr14 | 67150024 | 67150282 |
| chr14 | 67153505 | 67153761 |
| chr14 | 67153761 | 67153980 |
| chr14 | 67158721 | 67159459 |
| chr14 | 67169847 | 67170051 |
| chr14 | 67170277 | 67170692 |
| chr14 | 67175971 | 67176534 |
| chr14 | 67176534 | 67176907 |
| chr14 | 67181156 | 67181490 |
| chr14 | 67182677 | 67182928 |
| chr14 | 67183150 | 67183456 |
| chr14 | 67183775 | 67183958 |
| chr14 | 67186294 | 67186482 |
| chr14 | 67188371 | 67188693 |
| chr14 | 67188719 | 67188989 |
| chr14 | 67188989 | 67189251 |
| chr14 | 67194312 | 67194739 |
| chr14 | 67202941 | 67203215 |
| chr14 | 67211744 | 67212059 |
| chr14 | 67226217 | 67226434 |
| chr14 | 67233237 | 67233490 |
| chr14 | 67233974 | 67234322 |
| chr14 | 67234328 | 67234745 |
| chr14 | 67258324 | 67258640 |
| chr14 | 67260307 | 67260585 |
| chr14 | 67260710 | 67261013 |
| chr14 | 67275389 | 67275665 |
| chr14 | 67283116 | 67283487 |
| chr14 | 67289552 | 67289837 |
| chr14 | 67308200 | 67308350 |
| chr14 | 67438927 | 67439085 |
| chr14 | 67484659 | 67484855 |
| chr14 | 67485448 | 67485940 |
| chr14 | 67613266 | 67613485 |
| chr14 | 67620864 | 67621393 |
| chr14 | 67621590 | 67621793 |

|       |          |          |
|-------|----------|----------|
| chr14 | 67621878 | 67622126 |
| chr14 | 67623950 | 67624297 |
| chr14 | 67624297 | 67624579 |
| chr14 | 67635369 | 67635752 |
| chr14 | 67635906 | 67636087 |
| chr14 | 67642253 | 67642466 |
| chr14 | 67642485 | 67642961 |
| chr14 | 67642961 | 67643220 |
| chr14 | 67644418 | 67644653 |
| chr14 | 67663507 | 67663754 |
| chr14 | 67663754 | 67663968 |
| chr14 | 67664157 | 67664451 |
| chr14 | 67664451 | 67664668 |
| chr14 | 67672842 | 67673179 |
| chr14 | 67674713 | 67674977 |
| chr14 | 67715245 | 67715540 |
| chr14 | 67715577 | 67715952 |
| chr14 | 67715952 | 67716334 |
| chr14 | 67716362 | 67716663 |
| chr14 | 67716697 | 67717006 |
| chr14 | 67723174 | 67723502 |
| chr14 | 67754160 | 67754315 |
| chr14 | 67760277 | 67760544 |
| chr14 | 67760603 | 67760837 |
| chr14 | 67760837 | 67761046 |
| chr14 | 67802892 | 67803064 |
| chr14 | 67803753 | 67804250 |
| chr14 | 67851675 | 67852218 |
| chr14 | 67852712 | 67853020 |
| chr14 | 67853020 | 67853289 |
| chr14 | 67856476 | 67856697 |
| chr14 | 67877465 | 67878364 |
| chr14 | 67884791 | 67885055 |
| chr14 | 67885055 | 67885326 |
| chr14 | 67886857 | 67887237 |
| chr14 | 67888150 | 67888357 |
| chr14 | 67889803 | 67890192 |
| chr14 | 67890240 | 67890503 |
| chr14 | 67892821 | 67893006 |
| chr14 | 67899006 | 67899177 |
| chr14 | 67923435 | 67923671 |
| chr14 | 67923683 | 67924012 |

|       |          |          |
|-------|----------|----------|
| chr14 | 67924012 | 67924329 |
| chr14 | 67924329 | 67924652 |
| chr14 | 67929921 | 67930125 |
| chr14 | 67931456 | 67931632 |
| chr14 | 67932647 | 67932915 |
| chr14 | 67932938 | 67933187 |
| chr14 | 67933187 | 67933526 |
| chr14 | 67933526 | 67933993 |
| chr14 | 67934082 | 67934356 |
| chr14 | 67935346 | 67935568 |
| chr14 | 67940830 | 67941558 |
| chr14 | 67943081 | 67943394 |
| chr14 | 67946440 | 67946754 |
| chr14 | 67951328 | 67951525 |
| chr14 | 67951568 | 67952119 |
| chr14 | 67982450 | 67982611 |
| chr14 | 67993205 | 67993412 |
| chr14 | 68034394 | 68034812 |
| chr14 | 68040869 | 68041106 |
| chr14 | 68042532 | 68042750 |
| chr14 | 68044588 | 68045139 |
| chr14 | 68050836 | 68051028 |
| chr14 | 68051028 | 68051444 |
| chr14 | 68051570 | 68051844 |
| chr14 | 68065245 | 68065548 |
| chr14 | 68067881 | 68068034 |
| chr14 | 68083733 | 68083893 |
| chr14 | 68083944 | 68084118 |
| chr14 | 68084364 | 68084585 |
| chr14 | 68084726 | 68084900 |
| chr14 | 68085058 | 68085312 |
| chr14 | 68101752 | 68102285 |
| chr14 | 68102285 | 68102542 |
| chr14 | 68111756 | 68111993 |
| chr14 | 68118316 | 68118497 |
| chr14 | 68123661 | 68123916 |
| chr14 | 68124536 | 68124997 |
| chr14 | 68125624 | 68125859 |
| chr14 | 68139599 | 68139802 |
| chr14 | 68182713 | 68182941 |
| chr14 | 68198911 | 68199152 |
| chr14 | 68458668 | 68458884 |

|       |          |          |
|-------|----------|----------|
| chr14 | 68460461 | 68460742 |
| chr14 | 68642946 | 68643234 |
| chr14 | 68695828 | 68696393 |
| chr14 | 68718986 | 68719137 |
| chr14 | 68744682 | 68745045 |
| chr14 | 68776007 | 68776346 |
| chr14 | 68776346 | 68776715 |
| chr14 | 68778017 | 68778209 |
| chr14 | 68780082 | 68780340 |
| chr14 | 68780340 | 68780608 |
| chr14 | 68804597 | 68804831 |
| chr14 | 68809978 | 68810182 |
| chr14 | 68810182 | 68810445 |
| chr14 | 68847685 | 68847941 |
| chr14 | 68848592 | 68848841 |
| chr14 | 68903503 | 68903735 |
| chr14 | 68927873 | 68928196 |
| chr14 | 68954607 | 68954922 |
| chr14 | 68966861 | 68967070 |
| chr14 | 69006761 | 69006921 |
| chr14 | 69007460 | 69007660 |
| chr14 | 69008114 | 69008526 |
| chr14 | 69024249 | 69024470 |
| chr14 | 69028955 | 69029160 |
| chr14 | 69029756 | 69029922 |
| chr14 | 69088508 | 69088797 |
| chr14 | 69088968 | 69089432 |
| chr14 | 69089432 | 69089793 |
| chr14 | 69099364 | 69099514 |
| chr14 | 69103423 | 69103885 |
| chr14 | 69105098 | 69105507 |
| chr14 | 69105507 | 69105836 |
| chr14 | 69105908 | 69106107 |
| chr14 | 69130382 | 69130573 |
| chr14 | 69130575 | 69130749 |
| chr14 | 69133302 | 69133570 |
| chr14 | 69133570 | 69133842 |
| chr14 | 69135765 | 69136235 |
| chr14 | 69141028 | 69141250 |
| chr14 | 69141250 | 69141447 |
| chr14 | 69145314 | 69145548 |
| chr14 | 69146558 | 69146743 |

|       |          |          |
|-------|----------|----------|
| chr14 | 69160472 | 69160802 |
| chr14 | 69161923 | 69162171 |
| chr14 | 69162319 | 69162517 |
| chr14 | 69174716 | 69175310 |
| chr14 | 69176082 | 69176377 |
| chr14 | 69176406 | 69176556 |
| chr14 | 69190448 | 69190898 |
| chr14 | 69229600 | 69229945 |
| chr14 | 69230161 | 69230680 |
| chr14 | 69236050 | 69236219 |
| chr14 | 69236427 | 69236591 |
| chr14 | 69238260 | 69238609 |
| chr14 | 69241599 | 69241844 |
| chr14 | 69255686 | 69256016 |
| chr14 | 69256016 | 69256496 |
| chr14 | 69256622 | 69256799 |
| chr14 | 69257189 | 69257481 |
| chr14 | 69260733 | 69260983 |
| chr14 | 69267298 | 69267559 |
| chr14 | 69267559 | 69267979 |
| chr14 | 69269388 | 69269695 |
| chr14 | 69269695 | 69270294 |
| chr14 | 69273360 | 69273557 |
| chr14 | 69273866 | 69274053 |
| chr14 | 69275526 | 69275758 |
| chr14 | 69280646 | 69281218 |
| chr14 | 69281487 | 69281687 |
| chr14 | 69282073 | 69282380 |
| chr14 | 69284364 | 69284868 |
| chr14 | 69284868 | 69285385 |
| chr14 | 69293328 | 69293588 |
| chr14 | 69304439 | 69304719 |
| chr14 | 69324483 | 69324743 |
| chr14 | 69325824 | 69326103 |
| chr14 | 69327839 | 69328035 |
| chr14 | 69336887 | 69337239 |
| chr14 | 69337239 | 69337632 |
| chr14 | 69345606 | 69346028 |
| chr14 | 69364433 | 69364585 |
| chr14 | 69374585 | 69374745 |
| chr14 | 69380078 | 69380417 |
| chr14 | 69380429 | 69380649 |

|       |          |          |
|-------|----------|----------|
| chr14 | 69382923 | 69383083 |
| chr14 | 69385949 | 69386165 |
| chr14 | 69392096 | 69392530 |
| chr14 | 69392675 | 69392993 |
| chr14 | 69395697 | 69396005 |
| chr14 | 69396045 | 69396311 |
| chr14 | 69423649 | 69423961 |
| chr14 | 69423961 | 69424486 |
| chr14 | 69424681 | 69424831 |
| chr14 | 69430281 | 69430869 |
| chr14 | 69432856 | 69433037 |
| chr14 | 69435492 | 69435838 |
| chr14 | 69438020 | 69438416 |
| chr14 | 69438713 | 69439172 |
| chr14 | 69443046 | 69443420 |
| chr14 | 69447113 | 69447315 |
| chr14 | 69447315 | 69447566 |
| chr14 | 69448263 | 69448566 |
| chr14 | 69451152 | 69451388 |
| chr14 | 69466094 | 69466285 |
| chr14 | 69470187 | 69470422 |
| chr14 | 69471461 | 69471708 |
| chr14 | 69473952 | 69474264 |
| chr14 | 69474264 | 69474588 |
| chr14 | 69474873 | 69475049 |
| chr14 | 69475432 | 69475729 |
| chr14 | 69478946 | 69479212 |
| chr14 | 69485555 | 69485812 |
| chr14 | 69485812 | 69486246 |
| chr14 | 69487631 | 69487945 |
| chr14 | 69487945 | 69488544 |
| chr14 | 69491615 | 69491833 |
| chr14 | 69492136 | 69492291 |
| chr14 | 69493728 | 69493989 |
| chr14 | 69498896 | 69499468 |
| chr14 | 69499738 | 69499936 |
| chr14 | 69500324 | 69500630 |
| chr14 | 69502585 | 69503116 |
| chr14 | 69503116 | 69503632 |
| chr14 | 69511564 | 69511838 |
| chr14 | 69519113 | 69519313 |
| chr14 | 69522700 | 69522960 |

|       |          |          |
|-------|----------|----------|
| chr14 | 69542703 | 69542996 |
| chr14 | 69543933 | 69544115 |
| chr14 | 69544115 | 69544361 |
| chr14 | 69546084 | 69546334 |
| chr14 | 69555126 | 69555492 |
| chr14 | 69555492 | 69555859 |
| chr14 | 69563832 | 69564257 |
| chr14 | 69592835 | 69592999 |
| chr14 | 69598388 | 69598667 |
| chr14 | 69598684 | 69598863 |
| chr14 | 69601171 | 69601332 |
| chr14 | 69604211 | 69604425 |
| chr14 | 69610371 | 69610799 |
| chr14 | 69610958 | 69611247 |
| chr14 | 69613969 | 69614317 |
| chr14 | 69614319 | 69614599 |
| chr14 | 69641944 | 69642246 |
| chr14 | 69642246 | 69642761 |
| chr14 | 69642934 | 69643094 |
| chr14 | 69648561 | 69649154 |
| chr14 | 69651121 | 69651340 |
| chr14 | 69653748 | 69654113 |
| chr14 | 69656301 | 69656695 |
| chr14 | 69656989 | 69657440 |
| chr14 | 69661326 | 69661697 |
| chr14 | 69665376 | 69665581 |
| chr14 | 69665581 | 69665833 |
| chr14 | 69666485 | 69666864 |
| chr14 | 69669420 | 69669686 |
| chr14 | 69669791 | 69669941 |
| chr14 | 69684357 | 69684564 |
| chr14 | 69688458 | 69688697 |
| chr14 | 69689731 | 69690001 |
| chr14 | 69691511 | 69691676 |
| chr14 | 69691800 | 69692043 |
| chr14 | 69692043 | 69692250 |
| chr14 | 69692366 | 69692579 |
| chr14 | 69692579 | 69692819 |
| chr14 | 69697116 | 69697379 |
| chr14 | 69706816 | 69707143 |
| chr14 | 69707143 | 69707460 |
| chr14 | 69707460 | 69707757 |

|       |          |          |
|-------|----------|----------|
| chr14 | 69732008 | 69732452 |
| chr14 | 69732452 | 69732973 |
| chr14 | 69733625 | 69733890 |
| chr14 | 69734638 | 69734788 |
| chr14 | 69740672 | 69741037 |
| chr14 | 69741093 | 69741304 |
| chr14 | 69741304 | 69741598 |
| chr14 | 69741598 | 69742036 |
| chr14 | 69743790 | 69744035 |
| chr14 | 69763371 | 69763972 |
| chr14 | 69767353 | 69767593 |
| chr14 | 69767611 | 69767863 |
| chr14 | 69768074 | 69768338 |
| chr14 | 69771653 | 69771803 |
| chr14 | 69773750 | 69773936 |
| chr14 | 69783095 | 69783342 |
| chr14 | 69804026 | 69804236 |
| chr14 | 69804842 | 69805162 |
| chr14 | 69805162 | 69805523 |
| chr14 | 69805523 | 69805873 |
| chr14 | 69810371 | 69810565 |
| chr14 | 69812746 | 69813016 |
| chr14 | 69813016 | 69813543 |
| chr14 | 69815459 | 69815669 |
| chr14 | 69815744 | 69816594 |
| chr14 | 69823334 | 69823622 |
| chr14 | 69823659 | 69823874 |
| chr14 | 69827982 | 69828132 |
| chr14 | 69835332 | 69835553 |
| chr14 | 69845131 | 69845376 |
| chr14 | 69851228 | 69851485 |
| chr14 | 69852713 | 69852958 |
| chr14 | 69852958 | 69853235 |
| chr14 | 69861387 | 69861882 |
| chr14 | 69862522 | 69862806 |
| chr14 | 69897791 | 69898153 |
| chr14 | 69911443 | 69912140 |
| chr14 | 69912208 | 69912500 |
| chr14 | 69913223 | 69913492 |
| chr14 | 69926087 | 69926314 |
| chr14 | 69927125 | 69927309 |
| chr14 | 69965450 | 69965952 |



|       |          |          |
|-------|----------|----------|
| chr14 | 69966429 | 69966964 |
| chr14 | 69970520 | 69970697 |
| chr14 | 69979027 | 69979253 |
| chr14 | 69983993 | 69984149 |
| chr14 | 69994835 | 69995327 |
| chr14 | 70021244 | 70021494 |
| chr14 | 70021494 | 70021777 |
| chr14 | 70028189 | 70028443 |
| chr14 | 70031958 | 70032316 |
| chr14 | 70056791 | 70057399 |
| chr14 | 70067944 | 70068251 |
| chr14 | 70074431 | 70074784 |
| chr14 | 70074784 | 70075270 |
| chr14 | 70075683 | 70075871 |
| chr14 | 70075871 | 70076050 |
| chr14 | 70076132 | 70076305 |
| chr14 | 70076729 | 70077071 |
| chr14 | 70090994 | 70091331 |
| chr14 | 70096033 | 70096358 |
| chr14 | 70096358 | 70096670 |
| chr14 | 70096759 | 70096962 |
| chr14 | 70099887 | 70100277 |
| chr14 | 70100277 | 70100559 |
| chr14 | 70106584 | 70106930 |
| chr14 | 70135539 | 70135833 |
| chr14 | 70135833 | 70136066 |
| chr14 | 70136066 | 70136410 |
| chr14 | 70136415 | 70136576 |
| chr14 | 70153184 | 70153586 |
| chr14 | 70153586 | 70154029 |
| chr14 | 70159129 | 70159371 |
| chr14 | 70159371 | 70159654 |
| chr14 | 70159654 | 70160085 |
| chr14 | 70160545 | 70160700 |
| chr14 | 70160774 | 70161110 |
| chr14 | 70161890 | 70162294 |
| chr14 | 70166149 | 70166384 |
| chr14 | 70167935 | 70168300 |
| chr14 | 70169222 | 70169448 |
| chr14 | 70169448 | 70169652 |
| chr14 | 70173035 | 70173219 |
| chr14 | 70173617 | 70173863 |

|       |          |          |
|-------|----------|----------|
| chr14 | 70173956 | 70174215 |
| chr14 | 70175323 | 70175507 |
| chr14 | 70175804 | 70176216 |
| chr14 | 70176680 | 70176959 |
| chr14 | 70177201 | 70177358 |
| chr14 | 70177386 | 70177625 |
| chr14 | 70177625 | 70177922 |
| chr14 | 70179291 | 70179643 |
| chr14 | 70179704 | 70180023 |
| chr14 | 70187130 | 70187568 |
| chr14 | 70187568 | 70187848 |
| chr14 | 70191492 | 70191751 |
| chr14 | 70191751 | 70192082 |
| chr14 | 70192082 | 70192397 |
| chr14 | 70195912 | 70196482 |
| chr14 | 70206245 | 70206676 |
| chr14 | 70206678 | 70206951 |
| chr14 | 70208114 | 70208277 |
| chr14 | 70208277 | 70208441 |
| chr14 | 70210105 | 70210290 |
| chr14 | 70288817 | 70289275 |
| chr14 | 70289275 | 70289807 |
| chr14 | 70302977 | 70303181 |
| chr14 | 70303710 | 70303885 |
| chr14 | 70304414 | 70304691 |
| chr14 | 70308610 | 70309077 |
| chr14 | 70309201 | 70309397 |
| chr14 | 70309459 | 70309727 |
| chr14 | 70309892 | 70310191 |
| chr14 | 70310191 | 70310444 |
| chr14 | 70314007 | 70314157 |
| chr14 | 70317726 | 70317933 |
| chr14 | 70324244 | 70324734 |
| chr14 | 70324734 | 70324950 |
| chr14 | 70324950 | 70325133 |
| chr14 | 70330168 | 70330354 |
| chr14 | 70331554 | 70331714 |
| chr14 | 70333224 | 70333601 |
| chr14 | 70333601 | 70334137 |
| chr14 | 70336382 | 70336608 |
| chr14 | 70336608 | 70336868 |
| chr14 | 70340597 | 70340880 |

|       |          |          |
|-------|----------|----------|
| chr14 | 70341007 | 70341740 |
| chr14 | 70349335 | 70349556 |
| chr14 | 70350681 | 70350925 |
| chr14 | 70350925 | 70351263 |
| chr14 | 70351263 | 70351671 |
| chr14 | 70370937 | 70371293 |
| chr14 | 70381717 | 70381954 |
| chr14 | 70392755 | 70392906 |
| chr14 | 70442835 | 70443104 |
| chr14 | 70443104 | 70443348 |
| chr14 | 70443348 | 70443989 |
| chr14 | 70454526 | 70454692 |
| chr14 | 70457525 | 70457706 |
| chr14 | 70468136 | 70468331 |
| chr14 | 70469782 | 70470226 |
| chr14 | 70470226 | 70470565 |
| chr14 | 70471753 | 70472029 |
| chr14 | 70508576 | 70508728 |
| chr14 | 70515360 | 70515681 |
| chr14 | 70515932 | 70516155 |
| chr14 | 70516500 | 70516895 |
| chr14 | 70519926 | 70520311 |
| chr14 | 70520311 | 70520621 |
| chr14 | 70520621 | 70520867 |
| chr14 | 70527043 | 70527329 |
| chr14 | 70528186 | 70528345 |
| chr14 | 70528388 | 70528582 |
| chr14 | 70530706 | 70531102 |
| chr14 | 70531364 | 70531723 |
| chr14 | 70538049 | 70538339 |
| chr14 | 70538339 | 70538658 |
| chr14 | 70540785 | 70541207 |
| chr14 | 70545073 | 70545378 |
| chr14 | 70545378 | 70545596 |
| chr14 | 70545596 | 70545793 |
| chr14 | 70545928 | 70546179 |
| chr14 | 70546179 | 70546537 |
| chr14 | 70549299 | 70549651 |
| chr14 | 70554028 | 70554394 |
| chr14 | 70554394 | 70554712 |
| chr14 | 70554782 | 70555174 |
| chr14 | 70557052 | 70557202 |

|       |          |          |
|-------|----------|----------|
| chr14 | 70563292 | 70563582 |
| chr14 | 70570212 | 70570565 |
| chr14 | 70574692 | 70574942 |
| chr14 | 70575254 | 70575598 |
| chr14 | 70577440 | 70577836 |
| chr14 | 70577836 | 70578258 |
| chr14 | 70578523 | 70578706 |
| chr14 | 70592140 | 70592333 |
| chr14 | 70599032 | 70599417 |
| chr14 | 70599417 | 70599764 |
| chr14 | 70599764 | 70600148 |
| chr14 | 70605407 | 70605634 |
| chr14 | 70609684 | 70609918 |
| chr14 | 70610891 | 70611198 |
| chr14 | 70617816 | 70618304 |
| chr14 | 70618304 | 70618525 |
| chr14 | 70618525 | 70618829 |
| chr14 | 70618829 | 70619233 |
| chr14 | 70629351 | 70629775 |
| chr14 | 70635813 | 70636063 |
| chr14 | 70637609 | 70637823 |
| chr14 | 70645345 | 70645603 |
| chr14 | 70645603 | 70645875 |
| chr14 | 70647084 | 70647532 |
| chr14 | 70658940 | 70659542 |
| chr14 | 70659542 | 70659950 |
| chr14 | 70737586 | 70737797 |
| chr14 | 70766223 | 70766553 |
| chr14 | 70766553 | 70766854 |
| chr14 | 70766854 | 70767139 |
| chr14 | 70767527 | 70767961 |
| chr14 | 70772730 | 70773003 |
| chr14 | 70773032 | 70773382 |
| chr14 | 70774247 | 70774397 |
| chr14 | 70774420 | 70774637 |
| chr14 | 70776838 | 70777198 |
| chr14 | 70778096 | 70778362 |
| chr14 | 70780837 | 70781193 |
| chr14 | 70781193 | 70781557 |
| chr14 | 70798670 | 70798861 |
| chr14 | 70858757 | 70858907 |
| chr14 | 70885881 | 70886147 |

|       |          |          |
|-------|----------|----------|
| chr14 | 70889705 | 70890150 |
| chr14 | 70894276 | 70894435 |
| chr14 | 71082381 | 71082762 |
| chr14 | 71103954 | 71104505 |
| chr14 | 71107598 | 71107807 |
| chr14 | 71128462 | 71128945 |
| chr14 | 71169755 | 71170134 |
| chr14 | 71174010 | 71174577 |
| chr14 | 71199186 | 71199602 |
| chr14 | 71199602 | 71200060 |
| chr14 | 71225829 | 71225979 |
| chr14 | 71230077 | 71230246 |
| chr14 | 71230365 | 71230823 |
| chr14 | 71281007 | 71281281 |
| chr14 | 71326714 | 71327056 |
| chr14 | 71537438 | 71537739 |
| chr14 | 71635010 | 71635245 |
| chr14 | 71658681 | 71658868 |
| chr14 | 71670500 | 71670725 |
| chr14 | 71680651 | 71680916 |
| chr14 | 71795660 | 71796094 |
| chr14 | 71796094 | 71796428 |
| chr14 | 71796637 | 71796958 |
| chr14 | 71845598 | 71845890 |
| chr14 | 71845890 | 71846113 |
| chr14 | 72293755 | 72294039 |
| chr14 | 72319741 | 72320007 |
| chr14 | 72380215 | 72380502 |
| chr14 | 72392911 | 72393673 |
| chr14 | 72401904 | 72402699 |
| chr14 | 72404642 | 72404854 |
| chr14 | 72435448 | 72435788 |
| chr14 | 72435800 | 72435950 |
| chr14 | 72444717 | 72444900 |
| chr14 | 72445820 | 72446532 |
| chr14 | 72446675 | 72446972 |
| chr14 | 72447213 | 72447402 |
| chr14 | 72450633 | 72451125 |
| chr14 | 72459462 | 72459689 |
| chr14 | 72459689 | 72460154 |
| chr14 | 72461361 | 72461604 |
| chr14 | 72475224 | 72475451 |

|       |          |          |
|-------|----------|----------|
| chr14 | 72475468 | 72475819 |
| chr14 | 72475902 | 72476301 |
| chr14 | 72479160 | 72479430 |
| chr14 | 72479887 | 72480398 |
| chr14 | 72486287 | 72486599 |
| chr14 | 72486599 | 72487155 |
| chr14 | 72492054 | 72492283 |
| chr14 | 72497746 | 72497978 |
| chr14 | 72512476 | 72512633 |
| chr14 | 72516465 | 72516697 |
| chr14 | 72532239 | 72532631 |
| chr14 | 72532631 | 72532886 |
| chr14 | 72558875 | 72559118 |
| chr14 | 72602911 | 72603224 |
| chr14 | 72634082 | 72634253 |
| chr14 | 72634253 | 72634414 |
| chr14 | 72682034 | 72682287 |
| chr14 | 72682287 | 72682583 |
| chr14 | 72682583 | 72682886 |
| chr14 | 72682886 | 72683282 |
| chr14 | 72709215 | 72709770 |
| chr14 | 72709770 | 72710112 |
| chr14 | 72710112 | 72710426 |
| chr14 | 72710426 | 72710731 |
| chr14 | 72738357 | 72738540 |
| chr14 | 72770751 | 72771047 |
| chr14 | 72771047 | 72771314 |
| chr14 | 72777991 | 72778301 |
| chr14 | 72778869 | 72779149 |
| chr14 | 72779420 | 72779585 |
| chr14 | 72779718 | 72779963 |
| chr14 | 72784359 | 72784541 |
| chr14 | 72807288 | 72807623 |
| chr14 | 72807623 | 72807860 |
| chr14 | 72807931 | 72808284 |
| chr14 | 72810328 | 72810700 |
| chr14 | 72825615 | 72826039 |
| chr14 | 72830684 | 72830887 |
| chr14 | 72835050 | 72835468 |
| chr14 | 72835535 | 72835730 |
| chr14 | 72850691 | 72850847 |
| chr14 | 72850914 | 72851201 |

|       |          |          |
|-------|----------|----------|
| chr14 | 72869172 | 72869512 |
| chr14 | 72869512 | 72869816 |
| chr14 | 72869936 | 72870110 |
| chr14 | 72875066 | 72875243 |
| chr14 | 72886588 | 72886895 |
| chr14 | 72886895 | 72887420 |
| chr14 | 72889535 | 72889790 |
| chr14 | 72923910 | 72924348 |
| chr14 | 72924843 | 72925292 |
| chr14 | 72925361 | 72925519 |
| chr14 | 72926474 | 72926901 |
| chr14 | 72965777 | 72965996 |
| chr14 | 72982965 | 72983214 |
| chr14 | 72983214 | 72983429 |
| chr14 | 72983444 | 72983841 |
| chr14 | 73014197 | 73014589 |
| chr14 | 73017411 | 73017602 |
| chr14 | 73105391 | 73105690 |
| chr14 | 73122984 | 73123235 |
| chr14 | 73142800 | 73143277 |
| chr14 | 73143277 | 73143490 |
| chr14 | 73143490 | 73143737 |
| chr14 | 73143737 | 73143941 |
| chr14 | 73146876 | 73147026 |
| chr14 | 73170029 | 73170179 |
| chr14 | 73234419 | 73234706 |
| chr14 | 73234706 | 73234996 |
| chr14 | 73235199 | 73235387 |
| chr14 | 73237775 | 73238096 |
| chr14 | 73238096 | 73238341 |
| chr14 | 73238502 | 73238746 |
| chr14 | 73238957 | 73239107 |
| chr14 | 73239338 | 73239493 |
| chr14 | 73253346 | 73253831 |
| chr14 | 73253831 | 73254202 |
| chr14 | 73262129 | 73262590 |
| chr14 | 73274734 | 73274978 |
| chr14 | 73293564 | 73294025 |
| chr14 | 73295561 | 73295902 |
| chr14 | 73325149 | 73325361 |
| chr14 | 73325361 | 73325579 |
| chr14 | 73325579 | 73325846 |

|       |          |          |
|-------|----------|----------|
| chr14 | 73325846 | 73326346 |
| chr14 | 73365145 | 73365350 |
| chr14 | 73369015 | 73369285 |
| chr14 | 73371673 | 73371865 |
| chr14 | 73384690 | 73385032 |
| chr14 | 73385032 | 73385364 |
| chr14 | 73385364 | 73385619 |
| chr14 | 73385619 | 73385926 |
| chr14 | 73388551 | 73388937 |
| chr14 | 73394116 | 73394595 |
| chr14 | 73394636 | 73395116 |
| chr14 | 73402361 | 73402676 |
| chr14 | 73410152 | 73410405 |
| chr14 | 73441921 | 73442295 |
| chr14 | 73442295 | 73442602 |
| chr14 | 73447244 | 73447486 |
| chr14 | 73449188 | 73449423 |
| chr14 | 73451401 | 73451658 |
| chr14 | 73453314 | 73453575 |
| chr14 | 73460697 | 73460999 |
| chr14 | 73474857 | 73475139 |
| chr14 | 73508003 | 73508335 |
| chr14 | 73509765 | 73510124 |
| chr14 | 73510124 | 73510346 |
| chr14 | 73510376 | 73510650 |
| chr14 | 73524742 | 73525107 |
| chr14 | 73525107 | 73525401 |
| chr14 | 73552578 | 73552893 |
| chr14 | 73552893 | 73553113 |
| chr14 | 73553113 | 73553364 |
| chr14 | 73553364 | 73553583 |
| chr14 | 73656555 | 73656705 |
| chr14 | 73776150 | 73776390 |
| chr14 | 73803675 | 73804228 |
| chr14 | 73813306 | 73813538 |
| chr14 | 73825661 | 73825825 |
| chr14 | 73828891 | 73829206 |
| chr14 | 73838798 | 73839333 |
| chr14 | 73854516 | 73854740 |
| chr14 | 73871454 | 73871804 |
| chr14 | 73894565 | 73894821 |
| chr14 | 73902146 | 73902438 |



|       |          |          |
|-------|----------|----------|
| chr14 | 73902438 | 73902865 |
| chr14 | 74017977 | 74018203 |
| chr14 | 74018331 | 74018647 |
| chr14 | 74065862 | 74066078 |
| chr14 | 74094834 | 74095047 |
| chr14 | 74098869 | 74099192 |
| chr14 | 74099728 | 74100039 |
| chr14 | 74143440 | 74143862 |
| chr14 | 74169085 | 74169449 |
| chr14 | 74169449 | 74169795 |
| chr14 | 74218041 | 74218427 |
| chr14 | 74220322 | 74220478 |
| chr14 | 74222267 | 74222494 |
| chr14 | 74251118 | 74251401 |
| chr14 | 74264180 | 74264501 |
| chr14 | 74267115 | 74267391 |
| chr14 | 74283682 | 74283859 |
| chr14 | 74294698 | 74294902 |
| chr14 | 74309437 | 74309913 |
| chr14 | 74309913 | 74310225 |
| chr14 | 74327292 | 74327735 |
| chr14 | 74358795 | 74359082 |
| chr14 | 74369777 | 74370034 |
| chr14 | 74380728 | 74380979 |
| chr14 | 74381032 | 74381284 |
| chr14 | 74384444 | 74384911 |
| chr14 | 74482869 | 74483120 |
| chr14 | 74490635 | 74490903 |
| chr14 | 74490903 | 74491182 |
| chr14 | 74519523 | 74520146 |
| chr14 | 74541832 | 74542005 |
| chr14 | 74542119 | 74542416 |
| chr14 | 74543216 | 74543505 |
| chr14 | 74551171 | 74551498 |
| chr14 | 74599762 | 74600038 |
| chr14 | 74602688 | 74602848 |
| chr14 | 74616614 | 74616909 |
| chr14 | 74641101 | 74641282 |
| chr14 | 74642965 | 74643208 |
| chr14 | 74643219 | 74643677 |
| chr14 | 74646179 | 74646449 |
| chr14 | 74646449 | 74646807 |

|       |          |          |
|-------|----------|----------|
| chr14 | 74646824 | 74646984 |
| chr14 | 74718654 | 74718806 |
| chr14 | 74731815 | 74732440 |
| chr14 | 74732440 | 74732820 |
| chr14 | 74733404 | 74733790 |
| chr14 | 74736881 | 74737275 |
| chr14 | 74750851 | 74751192 |
| chr14 | 74751340 | 74751521 |
| chr14 | 74764294 | 74764498 |
| chr14 | 74787777 | 74788049 |
| chr14 | 74822546 | 74822748 |
| chr14 | 74822799 | 74823119 |
| chr14 | 74823119 | 74823411 |
| chr14 | 74823411 | 74823750 |
| chr14 | 74828157 | 74828423 |
| chr14 | 74840344 | 74840624 |
| chr14 | 74845600 | 74845994 |
| chr14 | 74845994 | 74846290 |
| chr14 | 74848963 | 74849389 |
| chr14 | 74852025 | 74852216 |
| chr14 | 74852830 | 74853259 |
| chr14 | 74853361 | 74853511 |
| chr14 | 74871260 | 74871536 |
| chr14 | 74880961 | 74881131 |
| chr14 | 74908783 | 74909042 |
| chr14 | 74910266 | 74910854 |
| chr14 | 74940871 | 74941039 |
| chr14 | 74945852 | 74946055 |
| chr14 | 74946576 | 74946831 |
| chr14 | 74946831 | 74947119 |
| chr14 | 74947119 | 74947420 |
| chr14 | 74947420 | 74947742 |
| chr14 | 74947742 | 74948070 |
| chr14 | 74948556 | 74949138 |
| chr14 | 74962558 | 74963182 |
| chr14 | 74972418 | 74972588 |
| chr14 | 74972799 | 74973059 |
| chr14 | 74996527 | 74996933 |
| chr14 | 74998469 | 74998630 |
| chr14 | 75005894 | 75006138 |
| chr14 | 75015835 | 75016277 |
| chr14 | 75016277 | 75016700 |

|       |          |          |
|-------|----------|----------|
| chr14 | 75035505 | 75035737 |
| chr14 | 75045196 | 75045539 |
| chr14 | 75045539 | 75045823 |
| chr14 | 75052506 | 75052715 |
| chr14 | 75054461 | 75055009 |
| chr14 | 75055009 | 75055274 |
| chr14 | 75060323 | 75060541 |
| chr14 | 75060636 | 75060836 |
| chr14 | 75064639 | 75064789 |
| chr14 | 75108929 | 75109129 |
| chr14 | 75130473 | 75130713 |
| chr14 | 75130713 | 75130975 |
| chr14 | 75130975 | 75131369 |
| chr14 | 75136828 | 75136978 |
| chr14 | 75149847 | 75150064 |
| chr14 | 75161838 | 75161988 |
| chr14 | 75222420 | 75222632 |
| chr14 | 75238328 | 75238640 |
| chr14 | 75256607 | 75256833 |
| chr14 | 75283977 | 75284425 |
| chr14 | 75284425 | 75284832 |
| chr14 | 75288419 | 75288742 |
| chr14 | 75328114 | 75328347 |
| chr14 | 75329714 | 75329881 |
| chr14 | 75330716 | 75330921 |
| chr14 | 75366865 | 75367020 |
| chr14 | 75369953 | 75370245 |
| chr14 | 75370285 | 75370511 |
| chr14 | 75372141 | 75372339 |
| chr14 | 75378875 | 75379157 |
| chr14 | 75445651 | 75445947 |
| chr14 | 75450896 | 75451096 |
| chr14 | 75674018 | 75674304 |
| chr14 | 75710708 | 75711000 |
| chr14 | 75722072 | 75722303 |
| chr14 | 75727127 | 75727325 |
| chr14 | 75728269 | 75728430 |
| chr14 | 75753890 | 75754373 |
| chr14 | 75754373 | 75754771 |
| chr14 | 75757103 | 75757304 |
| chr14 | 75761125 | 75761347 |
| chr14 | 75767968 | 75768303 |

|       |          |          |
|-------|----------|----------|
| chr14 | 75769975 | 75770223 |
| chr14 | 75771118 | 75771270 |
| chr14 | 75786449 | 75786859 |
| chr14 | 75786859 | 75787297 |
| chr14 | 75793973 | 75794143 |
| chr14 | 75794149 | 75794651 |
| chr14 | 75794651 | 75794957 |
| chr14 | 75798151 | 75798483 |
| chr14 | 75818583 | 75818851 |
| chr14 | 75819205 | 75819368 |
| chr14 | 75819464 | 75819768 |
| chr14 | 75819836 | 75820085 |
| chr14 | 75820085 | 75820567 |
| chr14 | 75828298 | 75828722 |
| chr14 | 75828911 | 75829130 |
| chr14 | 75829130 | 75829363 |
| chr14 | 75829490 | 75829753 |
| chr14 | 75829906 | 75830240 |
| chr14 | 75832142 | 75832354 |
| chr14 | 75834241 | 75834521 |
| chr14 | 75834521 | 75834824 |
| chr14 | 75834824 | 75835140 |
| chr14 | 75835140 | 75835433 |
| chr14 | 75836618 | 75836827 |
| chr14 | 75844725 | 75845455 |
| chr14 | 75845455 | 75846008 |
| chr14 | 75850178 | 75850354 |
| chr14 | 75850354 | 75850578 |
| chr14 | 75850900 | 75851083 |
| chr14 | 75851853 | 75852484 |
| chr14 | 75858450 | 75858684 |
| chr14 | 75863527 | 75863772 |
| chr14 | 75863772 | 75864028 |
| chr14 | 75864028 | 75864434 |
| chr14 | 75868105 | 75868395 |
| chr14 | 75870767 | 75870996 |
| chr14 | 75876348 | 75876681 |
| chr14 | 75899574 | 75899924 |
| chr14 | 75923422 | 75923624 |
| chr14 | 75937582 | 75937784 |
| chr14 | 75937840 | 75938307 |
| chr14 | 75938964 | 75939214 |

|       |          |          |
|-------|----------|----------|
| chr14 | 75939214 | 75939770 |
| chr14 | 75950079 | 75950621 |
| chr14 | 75954784 | 75955052 |
| chr14 | 75992491 | 75992705 |
| chr14 | 76009242 | 76009396 |
| chr14 | 76010191 | 76010346 |
| chr14 | 76010385 | 76010691 |
| chr14 | 76010691 | 76011136 |
| chr14 | 76028310 | 76028490 |
| chr14 | 76066026 | 76066224 |
| chr14 | 76073827 | 76074033 |
| chr14 | 76077194 | 76077493 |
| chr14 | 76099362 | 76099697 |
| chr14 | 76099697 | 76099952 |
| chr14 | 76110476 | 76110955 |
| chr14 | 76110955 | 76111380 |
| chr14 | 76118915 | 76119321 |
| chr14 | 76121972 | 76122201 |
| chr14 | 76149962 | 76150216 |
| chr14 | 76152063 | 76152367 |
| chr14 | 76152367 | 76152610 |
| chr14 | 76152610 | 76153110 |
| chr14 | 76165221 | 76165419 |
| chr14 | 76175821 | 76176130 |
| chr14 | 76200589 | 76200739 |
| chr14 | 76202557 | 76202942 |
| chr14 | 76212642 | 76212824 |
| chr14 | 76223059 | 76223338 |
| chr14 | 76223338 | 76223605 |
| chr14 | 76278836 | 76279387 |
| chr14 | 76279644 | 76279857 |
| chr14 | 76295514 | 76295687 |
| chr14 | 76310437 | 76310597 |
| chr14 | 76328451 | 76328611 |
| chr14 | 76328794 | 76329065 |
| chr14 | 76330178 | 76330328 |
| chr14 | 76359972 | 76360432 |
| chr14 | 76414020 | 76414557 |
| chr14 | 76414557 | 76415064 |
| chr14 | 76415064 | 76415452 |
| chr14 | 76415452 | 76415639 |
| chr14 | 76467001 | 76467207 |

|       |          |          |
|-------|----------|----------|
| chr14 | 76476598 | 76477122 |
| chr14 | 76478231 | 76478496 |
| chr14 | 76478587 | 76478963 |
| chr14 | 76479163 | 76479364 |
| chr14 | 76479907 | 76480062 |
| chr14 | 76482231 | 76482424 |
| chr14 | 76484386 | 76484537 |
| chr14 | 76495035 | 76495325 |
| chr14 | 76495325 | 76495538 |
| chr14 | 76496122 | 76496316 |
| chr14 | 76496420 | 76496605 |
| chr14 | 76504104 | 76504722 |
| chr14 | 76505454 | 76505697 |
| chr14 | 76505701 | 76506231 |
| chr14 | 76508139 | 76508451 |
| chr14 | 76515651 | 76515959 |
| chr14 | 76520590 | 76521118 |
| chr14 | 76521420 | 76521603 |
| chr14 | 76534982 | 76535208 |
| chr14 | 76535208 | 76535694 |
| chr14 | 76555308 | 76555579 |
| chr14 | 76556067 | 76556286 |
| chr14 | 76556286 | 76556586 |
| chr14 | 76556586 | 76557130 |
| chr14 | 76557233 | 76557392 |
| chr14 | 76558271 | 76558561 |
| chr14 | 76569833 | 76569983 |
| chr14 | 76570262 | 76570753 |
| chr14 | 76579643 | 76580203 |
| chr14 | 76582536 | 76582930 |
| chr14 | 76585898 | 76586406 |
| chr14 | 76587014 | 76587328 |
| chr14 | 76594565 | 76594921 |
| chr14 | 76597867 | 76598072 |
| chr14 | 76603038 | 76603480 |
| chr14 | 76609931 | 76610176 |
| chr14 | 76610404 | 76610904 |
| chr14 | 76611079 | 76611330 |
| chr14 | 76616061 | 76616810 |
| chr14 | 76622531 | 76622837 |
| chr14 | 76623605 | 76624007 |
| chr14 | 76630054 | 76630489 |

|       |          |          |
|-------|----------|----------|
| chr14 | 76630489 | 76631016 |
| chr14 | 76641777 | 76642073 |
| chr14 | 76642177 | 76642538 |
| chr14 | 76652371 | 76652659 |
| chr14 | 76652769 | 76653096 |
| chr14 | 76657484 | 76657731 |
| chr14 | 76658182 | 76658366 |
| chr14 | 76658366 | 76658570 |
| chr14 | 76662884 | 76663361 |
| chr14 | 76664564 | 76664849 |
| chr14 | 76664864 | 76665150 |
| chr14 | 76665150 | 76665492 |
| chr14 | 76673884 | 76674179 |
| chr14 | 76687101 | 76687453 |
| chr14 | 76688046 | 76688348 |
| chr14 | 76698674 | 76699435 |
| chr14 | 76700307 | 76700563 |
| chr14 | 76731491 | 76732022 |
| chr14 | 76733260 | 76733667 |
| chr14 | 76740829 | 76741094 |
| chr14 | 76742180 | 76742803 |
| chr14 | 76747905 | 76748139 |
| chr14 | 76755622 | 76755956 |
| chr14 | 76755956 | 76756283 |
| chr14 | 76756283 | 76756543 |
| chr14 | 76756623 | 76756797 |
| chr14 | 76761698 | 76762056 |
| chr14 | 76762056 | 76762294 |
| chr14 | 76762915 | 76763156 |
| chr14 | 76773400 | 76773670 |
| chr14 | 76773703 | 76773911 |
| chr14 | 76775268 | 76775960 |
| chr14 | 76780604 | 76780926 |
| chr14 | 76786245 | 76786677 |
| chr14 | 76786944 | 76787203 |
| chr14 | 76787203 | 76787430 |
| chr14 | 76787500 | 76788000 |
| chr14 | 76789442 | 76789723 |
| chr14 | 76817204 | 76817820 |
| chr14 | 76818245 | 76818765 |
| chr14 | 76833914 | 76834168 |
| chr14 | 76834168 | 76834657 |

|       |          |          |
|-------|----------|----------|
| chr14 | 76834774 | 76835043 |
| chr14 | 76874891 | 76875428 |
| chr14 | 76875428 | 76875787 |
| chr14 | 76876047 | 76876405 |
| chr14 | 76877521 | 76877732 |
| chr14 | 76880877 | 76881181 |
| chr14 | 76882608 | 76882919 |
| chr14 | 76882919 | 76883224 |
| chr14 | 76883282 | 76883719 |
| chr14 | 76903421 | 76903715 |
| chr14 | 76947054 | 76947538 |
| chr14 | 76951400 | 76951841 |
| chr14 | 76952994 | 76953217 |
| chr14 | 76958765 | 76959268 |
| chr14 | 77008071 | 77008635 |
| chr14 | 77011105 | 77011354 |
| chr14 | 77011937 | 77012128 |
| chr14 | 77016877 | 77017032 |
| chr14 | 77017277 | 77017516 |
| chr14 | 77036108 | 77036581 |
| chr14 | 77036581 | 77036814 |
| chr14 | 77036814 | 77037050 |
| chr14 | 77100282 | 77100737 |
| chr14 | 77141687 | 77141905 |
| chr14 | 77157292 | 77157449 |
| chr14 | 77352032 | 77352317 |
| chr14 | 77539655 | 77539881 |
| chr14 | 77874306 | 77875027 |
| chr14 | 77875027 | 77875306 |
| chr14 | 77885961 | 77886141 |
| chr14 | 77932199 | 77932408 |
| chr14 | 77932408 | 77932620 |
| chr14 | 77932742 | 77932965 |
| chr14 | 77933249 | 77933548 |
| chr14 | 78098594 | 78098759 |
| chr14 | 78244883 | 78245102 |
| chr14 | 78292689 | 78292938 |
| chr14 | 78330204 | 78330354 |
| chr14 | 78330711 | 78330901 |
| chr14 | 78330965 | 78331216 |
| chr14 | 78335885 | 78336091 |
| chr14 | 78354262 | 78354432 |



|       |          |          |
|-------|----------|----------|
| chr14 | 78355252 | 78355587 |
| chr14 | 78375813 | 78376208 |
| chr14 | 78376208 | 78376470 |
| chr14 | 78383206 | 78383749 |
| chr14 | 78387035 | 78387360 |
| chr14 | 78397964 | 78398267 |
| chr14 | 78420219 | 78420526 |
| chr14 | 78459277 | 78459466 |
| chr14 | 78474200 | 78474394 |
| chr14 | 78482776 | 78483001 |
| chr14 | 78502778 | 78503244 |
| chr14 | 78536229 | 78536918 |
| chr14 | 78536918 | 78537317 |
| chr14 | 78566610 | 78566783 |
| chr14 | 78583254 | 78583534 |
| chr14 | 78593084 | 78593234 |
| chr14 | 78668359 | 78668675 |
| chr14 | 78724757 | 78724967 |
| chr14 | 78724967 | 78725294 |
| chr14 | 78731821 | 78732133 |
| chr14 | 78732133 | 78732397 |
| chr14 | 78732397 | 78732659 |
| chr14 | 78732659 | 78732966 |
| chr14 | 78732966 | 78733226 |
| chr14 | 78734690 | 78735013 |
| chr14 | 78748068 | 78748248 |
| chr14 | 78752671 | 78752856 |
| chr14 | 78788544 | 78788707 |
| chr14 | 78848855 | 78849251 |
| chr14 | 78849251 | 78849769 |
| chr14 | 78857970 | 78858201 |
| chr14 | 78858272 | 78858519 |
| chr14 | 78858519 | 78858791 |
| chr14 | 78898668 | 78898829 |
| chr14 | 78900937 | 78901131 |
| chr14 | 78935544 | 78935785 |
| chr14 | 78935785 | 78936173 |
| chr14 | 78968379 | 78968545 |
| chr14 | 79012779 | 79013080 |
| chr14 | 79049718 | 79049929 |
| chr14 | 79065555 | 79066064 |
| chr14 | 79089481 | 79089859 |

|       |          |          |
|-------|----------|----------|
| chr14 | 79106935 | 79107203 |
| chr14 | 79109425 | 79109702 |
| chr14 | 79109841 | 79110037 |
| chr14 | 79110073 | 79110293 |
| chr14 | 79114807 | 79115341 |
| chr14 | 79115372 | 79115616 |
| chr14 | 79160486 | 79160869 |
| chr14 | 79161077 | 79161256 |
| chr14 | 79181660 | 79182089 |
| chr14 | 79182089 | 79182336 |
| chr14 | 79231815 | 79232069 |
| chr14 | 79248497 | 79249101 |
| chr14 | 79249101 | 79249368 |
| chr14 | 79249455 | 79249652 |
| chr14 | 79273712 | 79273928 |
| chr14 | 79273928 | 79274228 |
| chr14 | 79274307 | 79274457 |
| chr14 | 79301295 | 79302006 |
| chr14 | 79311481 | 79311631 |
| chr14 | 79321274 | 79321492 |
| chr14 | 79389774 | 79389927 |
| chr14 | 79389927 | 79390085 |
| chr14 | 79390181 | 79390540 |
| chr14 | 79390540 | 79391013 |
| chr14 | 79394617 | 79394873 |
| chr14 | 79397666 | 79398097 |
| chr14 | 79426284 | 79426694 |
| chr14 | 79426694 | 79427011 |
| chr14 | 79451635 | 79452027 |
| chr14 | 79452027 | 79452320 |
| chr14 | 79452320 | 79452518 |
| chr14 | 79476094 | 79476299 |
| chr14 | 79480697 | 79481008 |
| chr14 | 79481008 | 79481278 |
| chr14 | 79481278 | 79481529 |
| chr14 | 79481529 | 79482174 |
| chr14 | 79482261 | 79482455 |
| chr14 | 79483743 | 79483980 |
| chr14 | 79487206 | 79487478 |
| chr14 | 79487478 | 79487767 |
| chr14 | 79487769 | 79487952 |
| chr14 | 79488661 | 79488856 |

|       |          |          |
|-------|----------|----------|
| chr14 | 79503468 | 79503700 |
| chr14 | 79503724 | 79504028 |
| chr14 | 79504028 | 79504270 |
| chr14 | 79504335 | 79504642 |
| chr14 | 79504642 | 79504951 |
| chr14 | 79509117 | 79509268 |
| chr14 | 79515193 | 79515423 |
| chr14 | 79515438 | 79515785 |
| chr14 | 79515811 | 79515989 |
| chr14 | 79516352 | 79516506 |
| chr14 | 79527036 | 79527194 |
| chr14 | 79527709 | 79528159 |
| chr14 | 79534186 | 79534613 |
| chr14 | 79534753 | 79534967 |
| chr14 | 79534967 | 79535241 |
| chr14 | 79535378 | 79535610 |
| chr14 | 79537543 | 79537758 |
| chr14 | 79549549 | 79549740 |
| chr14 | 79550549 | 79550818 |
| chr14 | 79551988 | 79552277 |
| chr14 | 79562654 | 79562840 |
| chr14 | 79562859 | 79563120 |
| chr14 | 79564801 | 79564996 |
| chr14 | 79573872 | 79574153 |
| chr14 | 79587014 | 79587485 |
| chr14 | 79587485 | 79587834 |
| chr14 | 79587834 | 79588085 |
| chr14 | 79661008 | 79661429 |
| chr14 | 79661429 | 79661628 |
| chr14 | 79661628 | 79661803 |
| chr14 | 79769657 | 79770026 |
| chr14 | 79771194 | 79771485 |
| chr14 | 79960413 | 79960701 |
| chr14 | 80084677 | 80084914 |
| chr14 | 80207568 | 80207729 |
| chr14 | 80215996 | 80216217 |
| chr14 | 80484348 | 80484543 |
| chr14 | 80618151 | 80618397 |
| chr14 | 80626524 | 80626714 |
| chr14 | 80648855 | 80649078 |
| chr14 | 80657221 | 80657730 |
| chr14 | 82065101 | 82065676 |

|       |          |          |
|-------|----------|----------|
| chr14 | 82243398 | 82243671 |
| chr14 | 82753285 | 82753546 |
| chr14 | 82991032 | 82991331 |
| chr14 | 83737244 | 83737584 |
| chr14 | 84171507 | 84171885 |
| chr14 | 84442966 | 84443306 |
| chr14 | 84443306 | 84443696 |
| chr14 | 84444228 | 84444541 |
| chr14 | 84498835 | 84499083 |
| chr14 | 85528162 | 85528321 |
| chr14 | 85747508 | 85747745 |
| chr14 | 86153315 | 86153595 |
| chr14 | 86198922 | 86199210 |
| chr14 | 86229843 | 86230065 |
| chr14 | 86230460 | 86230675 |
| chr14 | 86230675 | 86230886 |
| chr14 | 86246476 | 86246684 |
| chr14 | 86251916 | 86252222 |
| chr14 | 86254036 | 86254637 |
| chr14 | 86392234 | 86392467 |
| chr14 | 86477265 | 86477485 |
| chr14 | 86522039 | 86522329 |
| chr14 | 86522329 | 86522585 |
| chr14 | 86662940 | 86663199 |
| chr14 | 86825746 | 86826083 |
| chr14 | 86861661 | 86861860 |
| chr14 | 86869596 | 86869782 |
| chr14 | 86889524 | 86889751 |
| chr14 | 87023561 | 87023877 |
| chr14 | 87051275 | 87051564 |
| chr14 | 87088088 | 87088281 |
| chr14 | 87088448 | 87088746 |
| chr14 | 87089029 | 87089217 |
| chr14 | 87140340 | 87140629 |
| chr14 | 87140682 | 87141047 |
| chr14 | 87141047 | 87141518 |
| chr14 | 87141720 | 87142125 |
| chr14 | 87144520 | 87144702 |
| chr14 | 87146775 | 87147007 |
| chr14 | 87147317 | 87147524 |
| chr14 | 87205563 | 87205758 |
| chr14 | 87215191 | 87215437 |

|       |          |          |
|-------|----------|----------|
| chr14 | 87386640 | 87386806 |
| chr14 | 87415743 | 87416130 |
| chr14 | 87416130 | 87416406 |
| chr14 | 87416406 | 87416718 |
| chr14 | 87416773 | 87417344 |
| chr14 | 87426654 | 87426838 |
| chr14 | 87452172 | 87452325 |
| chr14 | 87552227 | 87552575 |
| chr14 | 87637193 | 87637498 |
| chr14 | 88393938 | 88394236 |
| chr14 | 88394852 | 88395407 |
| chr14 | 88396001 | 88396460 |
| chr14 | 88429469 | 88429759 |
| chr14 | 88470919 | 88471112 |
| chr14 | 88479256 | 88479412 |
| chr14 | 88898737 | 88899096 |
| chr14 | 88899143 | 88899315 |
| chr14 | 88899364 | 88899662 |
| chr14 | 88901282 | 88901749 |
| chr14 | 88974636 | 88975018 |
| chr14 | 89226995 | 89227214 |
| chr14 | 89348098 | 89348272 |
| chr14 | 89393951 | 89394220 |
| chr14 | 89404472 | 89404783 |
| chr14 | 89444116 | 89444348 |
| chr14 | 89451264 | 89451414 |
| chr14 | 89455262 | 89455830 |
| chr14 | 89456151 | 89456301 |
| chr14 | 89456835 | 89457129 |
| chr14 | 89457766 | 89457949 |
| chr14 | 89565608 | 89565792 |
| chr14 | 89569080 | 89569250 |
| chr14 | 89569288 | 89569566 |
| chr14 | 89570721 | 89571073 |
| chr14 | 89571073 | 89571452 |
| chr14 | 89578309 | 89578524 |
| chr14 | 89609669 | 89610094 |
| chr14 | 89610094 | 89610565 |
| chr14 | 89610577 | 89611021 |
| chr14 | 89730104 | 89730409 |
| chr14 | 89755837 | 89756150 |
| chr14 | 89876015 | 89876168 |

|       |          |          |
|-------|----------|----------|
| chr14 | 89898232 | 89898503 |
| chr14 | 89898902 | 89899144 |
| chr14 | 89922331 | 89922558 |
| chr14 | 89938931 | 89939081 |
| chr14 | 89980273 | 89980561 |
| chr14 | 90223094 | 90223304 |
| chr14 | 90448041 | 90448216 |
| chr14 | 90737404 | 90737609 |
| chr14 | 90911117 | 90911345 |
| chr14 | 91260166 | 91260369 |
| chr14 | 91407965 | 91408226 |
| chr14 | 91458888 | 91459044 |
| chr14 | 91647444 | 91647644 |
| chr14 | 91844665 | 91844866 |
| chr14 | 91849025 | 91849619 |
| chr14 | 91849619 | 91849874 |
| chr14 | 91913652 | 91913869 |
| chr14 | 91913898 | 91914272 |
| chr14 | 91946891 | 91947051 |
| chr14 | 92009315 | 92009516 |
| chr14 | 92081099 | 92081375 |
| chr14 | 92120139 | 92120522 |
| chr14 | 92303239 | 92303398 |
| chr14 | 92832824 | 92833456 |
| chr14 | 92833456 | 92833999 |
| chr14 | 92881878 | 92882033 |
| chr14 | 93056914 | 93057171 |
| chr14 | 93058038 | 93058188 |
| chr14 | 93062252 | 93062824 |
| chr14 | 93069962 | 93070552 |
| chr14 | 93071942 | 93072102 |
| chr14 | 93079219 | 93079639 |
| chr14 | 93079884 | 93080330 |
| chr14 | 93181845 | 93182070 |
| chr14 | 93199506 | 93199775 |
| chr14 | 93199775 | 93200142 |
| chr14 | 93350991 | 93351171 |
| chr14 | 93524436 | 93524690 |
| chr14 | 93654007 | 93654273 |
| chr14 | 93654273 | 93654519 |
| chr14 | 93684780 | 93684954 |
| chr14 | 93889227 | 93889513 |

|       |          |          |
|-------|----------|----------|
| chr14 | 93889834 | 93890102 |
| chr14 | 93890285 | 93890602 |
| chr14 | 93890602 | 93890849 |
| chr14 | 93890849 | 93891064 |
| chr14 | 93891064 | 93891292 |
| chr14 | 94326402 | 94326552 |
| chr14 | 94735300 | 94735653 |
| chr14 | 94752859 | 94753093 |
| chr14 | 94851539 | 94851754 |
| chr14 | 94851754 | 94852033 |
| chr14 | 94860306 | 94860503 |
| chr14 | 94912416 | 94912566 |
| chr14 | 94918880 | 94919172 |
| chr14 | 94931583 | 94931767 |
| chr14 | 94931883 | 94932117 |
| chr14 | 95587947 | 95588229 |
| chr14 | 95881120 | 95881294 |
| chr14 | 95928467 | 95928681 |
| chr14 | 95979370 | 95979535 |
| chr14 | 96003579 | 96003911 |
| chr14 | 96107467 | 96107834 |
| chr14 | 96109855 | 96110006 |
| chr14 | 96154106 | 96154274 |
| chr14 | 96297554 | 96297872 |
| chr14 | 96301484 | 96301702 |
| chr14 | 96348270 | 96348591 |
| chr14 | 96499984 | 96500352 |
| chr14 | 96517848 | 96518009 |
| chr14 | 96518168 | 96518352 |
| chr14 | 96518352 | 96518581 |
| chr14 | 96518630 | 96518978 |
| chr14 | 96518978 | 96519335 |
| chr14 | 96519335 | 96519729 |
| chr14 | 96584893 | 96585172 |
| chr14 | 96683435 | 96683829 |
| chr14 | 96683834 | 96684188 |
| chr14 | 96684188 | 96684498 |
| chr14 | 96716532 | 96716853 |
| chr14 | 96760758 | 96761058 |
| chr14 | 96763314 | 96763597 |
| chr14 | 96935947 | 96936137 |
| chr14 | 96995689 | 96995906 |

|       |          |          |
|-------|----------|----------|
| chr14 | 96996314 | 96996536 |
| chr14 | 97050896 | 97051048 |
| chr14 | 97328486 | 97328641 |
| chr14 | 97356894 | 97357376 |
| chr14 | 97403270 | 97403701 |
| chr14 | 97447823 | 97448278 |
| chr14 | 97448400 | 97448671 |
| chr14 | 97543237 | 97543387 |
| chr14 | 97544419 | 97544601 |
| chr14 | 98112573 | 98112851 |
| chr14 | 98113091 | 98113460 |
| chr14 | 98167833 | 98167995 |
| chr14 | 98168041 | 98168257 |
| chr14 | 98168257 | 98168496 |
| chr14 | 98168601 | 98168795 |
| chr14 | 98168833 | 98169224 |
| chr14 | 98169454 | 98169619 |
| chr14 | 98169722 | 98170122 |
| chr14 | 98265094 | 98265354 |
| chr14 | 98483385 | 98483576 |
| chr14 | 98501692 | 98501852 |
| chr14 | 98589880 | 98590247 |
| chr14 | 98626476 | 98626877 |
| chr14 | 98626877 | 98627276 |
| chr14 | 98699980 | 98700327 |
| chr14 | 98707257 | 98707593 |
| chr14 | 98707649 | 98707915 |
| chr14 | 98708306 | 98708604 |
| chr14 | 98708656 | 98708851 |
| chr14 | 98824614 | 98825046 |
| chr14 | 98848512 | 98848847 |
| chr14 | 98857791 | 98857951 |
| chr14 | 98912544 | 98912714 |
| chr14 | 98929293 | 98929832 |
| chr14 | 99037695 | 99038235 |
| chr14 | 99045436 | 99045626 |
| chr14 | 99045673 | 99046230 |
| chr14 | 99046230 | 99046467 |
| chr14 | 99046467 | 99046722 |
| chr14 | 99046756 | 99046907 |
| chr14 | 99046969 | 99047136 |
| chr14 | 99053690 | 99054164 |



|       |          |          |
|-------|----------|----------|
| chr14 | 99063121 | 99063496 |
| chr14 | 99070397 | 99070634 |
| chr14 | 99070634 | 99070809 |
| chr14 | 99070809 | 99071054 |
| chr14 | 99071228 | 99071519 |
| chr14 | 99099248 | 99099660 |
| chr14 | 99099660 | 99100148 |
| chr14 | 99129143 | 99129509 |
| chr14 | 99134111 | 99134344 |
| chr14 | 99134420 | 99134688 |
| chr14 | 99134768 | 99134944 |
| chr14 | 99134944 | 99135104 |
| chr14 | 99135161 | 99135316 |
| chr14 | 99142323 | 99142574 |
| chr14 | 99155158 | 99155349 |
| chr14 | 99174114 | 99174475 |
| chr14 | 99174475 | 99174707 |
| chr14 | 99176407 | 99176934 |
| chr14 | 99199787 | 99199987 |
| chr14 | 99205847 | 99206211 |
| chr14 | 99206250 | 99206490 |
| chr14 | 99298311 | 99298936 |
| chr14 | 99298936 | 99299453 |
| chr14 | 99301483 | 99301861 |
| chr14 | 99305370 | 99305706 |
| chr14 | 99311467 | 99311798 |
| chr14 | 99324209 | 99324845 |
| chr14 | 99324845 | 99325235 |
| chr14 | 99333063 | 99333406 |
| chr14 | 99337610 | 99337955 |
| chr14 | 99364102 | 99364304 |
| chr14 | 99364492 | 99364686 |
| chr14 | 99373499 | 99373664 |
| chr14 | 99373695 | 99374059 |
| chr14 | 99374995 | 99375506 |
| chr14 | 99383143 | 99383568 |
| chr14 | 99384695 | 99384984 |
| chr14 | 99385521 | 99385715 |
| chr14 | 99385740 | 99386002 |
| chr14 | 99388596 | 99388748 |
| chr14 | 99403161 | 99403457 |
| chr14 | 99403457 | 99403739 |

|       |          |          |
|-------|----------|----------|
| chr14 | 99422878 | 99423075 |
| chr14 | 99423126 | 99423454 |
| chr14 | 99423454 | 99423770 |
| chr14 | 99449055 | 99449648 |
| chr14 | 99449933 | 99450089 |
| chr14 | 99464725 | 99464879 |
| chr14 | 99464921 | 99465071 |
| chr14 | 99475344 | 99475602 |
| chr14 | 99475769 | 99476453 |
| chr14 | 99488130 | 99488376 |
| chr14 | 99499540 | 99499805 |
| chr14 | 99515491 | 99515787 |
| chr14 | 99521908 | 99522212 |
| chr14 | 99528950 | 99529333 |
| chr14 | 99535517 | 99535687 |
| chr14 | 99535737 | 99536151 |
| chr14 | 99536216 | 99536401 |
| chr14 | 99541698 | 99542119 |
| chr14 | 99542190 | 99542436 |
| chr14 | 99547970 | 99548258 |
| chr14 | 99548262 | 99548591 |
| chr14 | 99548591 | 99548924 |
| chr14 | 99548924 | 99549201 |
| chr14 | 99549216 | 99549534 |
| chr14 | 99578618 | 99578872 |
| chr14 | 99578872 | 99579106 |
| chr14 | 99579225 | 99579543 |
| chr14 | 99579543 | 99579811 |
| chr14 | 99579811 | 99580159 |
| chr14 | 99580358 | 99580508 |
| chr14 | 99584261 | 99584453 |
| chr14 | 99592699 | 99593056 |
| chr14 | 99609196 | 99609346 |
| chr14 | 99610891 | 99611060 |
| chr14 | 99624368 | 99624739 |
| chr14 | 99624739 | 99625282 |
| chr14 | 99630978 | 99631590 |
| chr14 | 99631866 | 99632161 |
| chr14 | 99632532 | 99632784 |
| chr14 | 99635902 | 99636108 |
| chr14 | 99636651 | 99637111 |
| chr14 | 99657735 | 99657967 |

|       |           |           |
|-------|-----------|-----------|
| chr14 | 99745755  | 99745973  |
| chr14 | 99763283  | 99763487  |
| chr14 | 99764177  | 99764350  |
| chr14 | 99806606  | 99806885  |
| chr14 | 99826473  | 99827146  |
| chr14 | 99894782  | 99895070  |
| chr14 | 99900701  | 99900950  |
| chr14 | 99931969  | 99932189  |
| chr14 | 99943286  | 99943514  |
| chr14 | 100009854 | 100010009 |
| chr14 | 100189658 | 100189810 |
| chr14 | 100284571 | 100284728 |
| chr14 | 100284814 | 100285268 |
| chr14 | 100285701 | 100286099 |
| chr14 | 100286399 | 100286590 |
| chr14 | 101340441 | 101340663 |
| chr14 | 101379434 | 101379660 |
| chr14 | 101504595 | 101504852 |
| chr14 | 101517477 | 101517633 |
| chr14 | 101522251 | 101522436 |
| chr14 | 101595331 | 101595589 |
| chr14 | 101602911 | 101603113 |
| chr14 | 101608064 | 101608510 |
| chr14 | 101608510 | 101608740 |
| chr14 | 101608740 | 101609048 |
| chr14 | 101609048 | 101609407 |
| chr14 | 101638186 | 101638404 |
| chr14 | 101640090 | 101640327 |
| chr14 | 101640327 | 101640588 |
| chr14 | 101640588 | 101640905 |
| chr14 | 101653486 | 101653787 |
| chr14 | 101653907 | 101654203 |
| chr14 | 101654203 | 101654491 |
| chr14 | 101654491 | 101654858 |
| chr14 | 101697146 | 101697303 |
| chr14 | 101697985 | 101698135 |
| chr14 | 101718752 | 101719072 |
| chr14 | 101729173 | 101729398 |
| chr14 | 101729398 | 101729651 |
| chr14 | 101729651 | 101729965 |
| chr14 | 101729965 | 101730227 |
| chr14 | 101762402 | 101762562 |

|       |           |           |
|-------|-----------|-----------|
| chr14 | 101767707 | 101768026 |
| chr14 | 101774740 | 101774987 |
| chr14 | 101781195 | 101781506 |
| chr14 | 101781986 | 101782351 |
| chr14 | 101782351 | 101782627 |
| chr14 | 101783449 | 101783703 |
| chr14 | 101787898 | 101788449 |
| chr14 | 101788452 | 101788861 |
| chr14 | 101789076 | 101789359 |
| chr14 | 101794512 | 101794866 |
| chr14 | 101794866 | 101795197 |
| chr14 | 101797934 | 101798425 |
| chr14 | 101798896 | 101799197 |
| chr14 | 101804221 | 101804492 |
| chr14 | 101804890 | 101805167 |
| chr14 | 101805167 | 101805379 |
| chr14 | 101805379 | 101805865 |
| chr14 | 101822353 | 101822765 |
| chr14 | 101822884 | 101823305 |
| chr14 | 101829700 | 101829974 |
| chr14 | 101830195 | 101830377 |
| chr14 | 101832157 | 101832487 |
| chr14 | 101833957 | 101834462 |
| chr14 | 101836502 | 101836746 |
| chr14 | 101837281 | 101837484 |
| chr14 | 101839721 | 101840065 |
| chr14 | 101840065 | 101840427 |
| chr14 | 101840427 | 101840739 |
| chr14 | 101848623 | 101848794 |
| chr14 | 101852524 | 101852855 |
| chr14 | 101853698 | 101854137 |
| chr14 | 101854337 | 101854499 |
| chr14 | 101861730 | 101861981 |
| chr14 | 101861984 | 101862459 |
| chr14 | 101862562 | 101862763 |
| chr14 | 101867184 | 101867377 |
| chr14 | 101868929 | 101869079 |
| chr14 | 101869155 | 101869508 |
| chr14 | 101870033 | 101870525 |
| chr14 | 101878245 | 101878444 |
| chr14 | 101878470 | 101878789 |
| chr14 | 101878789 | 101879075 |

|       |           |           |
|-------|-----------|-----------|
| chr14 | 101879075 | 101879357 |
| chr14 | 101879357 | 101879589 |
| chr14 | 101882994 | 101883289 |
| chr14 | 101886260 | 101886534 |
| chr14 | 101886534 | 101886721 |
| chr14 | 101891946 | 101892396 |
| chr14 | 101896809 | 101897057 |
| chr14 | 101904628 | 101904930 |
| chr14 | 101909412 | 101909613 |
| chr14 | 101934773 | 101935007 |
| chr14 | 101936612 | 101936930 |
| chr14 | 101936930 | 101937297 |
| chr14 | 101940348 | 101940618 |
| chr14 | 101942996 | 101943146 |
| chr14 | 101943190 | 101943372 |
| chr14 | 101945811 | 101946010 |
| chr14 | 101946796 | 101946959 |
| chr14 | 101947224 | 101947448 |
| chr14 | 101947528 | 101947679 |
| chr14 | 101948896 | 101949217 |
| chr14 | 101949217 | 101949535 |
| chr14 | 101977555 | 101977758 |
| chr14 | 102013357 | 102013529 |
| chr14 | 102081180 | 102081368 |
| chr14 | 102674664 | 102674872 |
| chr14 | 102981452 | 102981602 |
| chr14 | 102981686 | 102981900 |
| chr14 | 102981900 | 102982154 |
| chr14 | 102982154 | 102982547 |
| chr14 | 102982547 | 102982928 |
| chr14 | 102982928 | 102983195 |
| chr14 | 102995289 | 102995444 |
| chr14 | 103011923 | 103012073 |
| chr14 | 103012595 | 103012876 |
| chr14 | 103051454 | 103051728 |
| chr14 | 103069748 | 103070069 |
| chr14 | 103070069 | 103070359 |
| chr14 | 103070359 | 103070730 |
| chr14 | 103070810 | 103070979 |
| chr14 | 103086721 | 103086998 |
| chr14 | 103086998 | 103087303 |
| chr14 | 103088667 | 103088842 |

|       |           |           |
|-------|-----------|-----------|
| chr14 | 103094057 | 103094207 |
| chr14 | 103098758 | 103099399 |
| chr14 | 103099399 | 103099957 |
| chr14 | 103115365 | 103115614 |
| chr14 | 103132111 | 103132361 |
| chr14 | 103180130 | 103180297 |
| chr14 | 103345890 | 103346269 |
| chr14 | 103346269 | 103346464 |
| chr14 | 103346464 | 103346731 |
| chr14 | 103346731 | 103347240 |
| chr14 | 103349496 | 103349694 |
| chr14 | 103354723 | 103354881 |
| chr14 | 103354960 | 103355324 |
| chr14 | 103363297 | 103363447 |
| chr14 | 103375528 | 103375783 |
| chr14 | 103426463 | 103426666 |
| chr14 | 103440311 | 103440557 |
| chr14 | 103440680 | 103440830 |
| chr14 | 103446626 | 103447118 |
| chr14 | 103464339 | 103464731 |
| chr14 | 103469129 | 103469384 |
| chr14 | 103469404 | 103469786 |
| chr14 | 103469797 | 103470110 |
| chr14 | 103472316 | 103472508 |
| chr14 | 103479554 | 103479814 |
| chr14 | 103489063 | 103489271 |
| chr14 | 103489271 | 103489660 |
| chr14 | 103490230 | 103490701 |
| chr14 | 103500162 | 103500745 |
| chr14 | 103500963 | 103501303 |
| chr14 | 103504433 | 103504858 |
| chr14 | 103509559 | 103509919 |
| chr14 | 103512895 | 103513156 |
| chr14 | 103513156 | 103513453 |
| chr14 | 103513453 | 103513686 |
| chr14 | 103550533 | 103550782 |
| chr14 | 103568058 | 103568262 |
| chr14 | 103620313 | 103620516 |
| chr14 | 103649868 | 103650327 |
| chr14 | 103650327 | 103650607 |
| chr14 | 103650607 | 103650820 |
| chr14 | 103650820 | 103651162 |

|       |           |           |
|-------|-----------|-----------|
| chr14 | 103718882 | 103719145 |
| chr14 | 103719178 | 103719501 |
| chr14 | 104038946 | 104039177 |
| chr14 | 104466608 | 104466816 |
| chr14 | 104467348 | 104467810 |
| chr14 | 104467810 | 104468356 |
| chr14 | 104473128 | 104473313 |
| chr14 | 104521945 | 104522147 |
| chr14 | 104522147 | 104522351 |
| chr14 | 104522351 | 104522545 |
| chr14 | 104522545 | 104522834 |
| chr14 | 104715706 | 104716148 |
| chr14 | 104849385 | 104849599 |
| chr14 | 105061343 | 105061550 |
| chr14 | 105085367 | 105085638 |
| chr14 | 105085638 | 105085893 |
| chr14 | 105086966 | 105087256 |
| chr14 | 105176419 | 105176709 |
| chr14 | 105176709 | 105176997 |
| chr14 | 105176997 | 105177236 |
| chr14 | 105177236 | 105177775 |
| chr14 | 105232409 | 105232761 |
| chr14 | 105237735 | 105238028 |
| chr14 | 105243943 | 105244327 |
| chr14 | 105255614 | 105255997 |
| chr14 | 105258350 | 105258809 |
| chr14 | 105258809 | 105259092 |
| chr14 | 105259092 | 105259363 |
| chr14 | 105265962 | 105266167 |
| chr14 | 105287654 | 105287879 |
| chr14 | 105288590 | 105288950 |
| chr14 | 105289138 | 105289303 |
| chr14 | 105289303 | 105289470 |
| chr14 | 105328567 | 105328722 |
| chr14 | 105351185 | 105351419 |
| chr14 | 105359884 | 105360175 |
| chr14 | 105362234 | 105362592 |
| chr14 | 105362600 | 105362761 |
| chr14 | 105369788 | 105369956 |
| chr14 | 105397513 | 105397766 |
| chr14 | 105475069 | 105475271 |
| chr14 | 105501001 | 105501153 |

|       |           |           |
|-------|-----------|-----------|
| chr14 | 105510388 | 105510636 |
| chr14 | 105522340 | 105522603 |
| chr14 | 105588355 | 105588674 |
| chr14 | 105588674 | 105589182 |
| chr14 | 105589313 | 105589776 |
| chr14 | 105597614 | 105597849 |
| chr14 | 105607005 | 105607364 |
| chr14 | 105607418 | 105607570 |
| chr14 | 105615420 | 105615737 |
| chr14 | 105615737 | 105616199 |
| chr14 | 105629271 | 105629511 |
| chr14 | 105661652 | 105661945 |
| chr14 | 105662610 | 105662876 |
| chr14 | 105662876 | 105663274 |
| chr14 | 105663310 | 105663533 |
| chr14 | 105664920 | 105665266 |
| chr14 | 105669027 | 105669417 |
| chr14 | 105675105 | 105675447 |
| chr14 | 105678040 | 105678569 |
| chr14 | 105678633 | 105679005 |
| chr14 | 105684304 | 105684747 |
| chr14 | 105685191 | 105685392 |
| chr14 | 105730775 | 105731066 |
| chr14 | 105732136 | 105732423 |
| chr14 | 105732423 | 105732672 |
| chr14 | 105732672 | 105732973 |
| chr14 | 105738648 | 105738856 |
| chr14 | 105752128 | 105752407 |
| chr14 | 105752407 | 105752698 |
| chr14 | 105752698 | 105753051 |
| chr14 | 105764568 | 105764718 |
| chr14 | 105767167 | 105767480 |
| chr14 | 105773773 | 105773948 |
| chr14 | 105792392 | 105792679 |
| chr14 | 105802522 | 105802927 |
| chr14 | 105802927 | 105803390 |
| chr14 | 105805321 | 105805766 |
| chr14 | 105816154 | 105816373 |
| chr14 | 105841682 | 105841842 |
| chr14 | 105841932 | 105842302 |
| chr14 | 105862321 | 105862521 |
| chr14 | 105869223 | 105869431 |



|       |           |           |
|-------|-----------|-----------|
| chr14 | 105875151 | 105875439 |
| chr14 | 105890675 | 105890858 |
| chr14 | 105891070 | 105891286 |
| chr14 | 105895992 | 105896168 |
| chr14 | 105896951 | 105897238 |
| chr14 | 105897238 | 105897656 |
| chr14 | 105897656 | 105898061 |
| chr14 | 105898584 | 105898856 |
| chr14 | 105898856 | 105899147 |
| chr14 | 105922404 | 105922780 |
| chr14 | 105922833 | 105923460 |
| chr14 | 105926813 | 105927030 |
| chr14 | 105999914 | 106000163 |
| chr14 | 106011983 | 106012577 |
| chr14 | 106156690 | 106156911 |
| chr14 | 106162410 | 106162617 |
| chr14 | 106163313 | 106163500 |
| chr14 | 106163723 | 106164076 |
| chr14 | 106455746 | 106456199 |
| chr14 | 106517849 | 106518040 |
| chr14 | 106681273 | 106681524 |
| chr14 | 106867187 | 106867339 |
| chr14 | 107878773 | 107878970 |
| chr14 | 107985594 | 107985851 |
| chr14 | 107995167 | 107995545 |
| chr14 | 108002650 | 108002899 |
| chr14 | 108007382 | 108007542 |
| chr14 | 108034263 | 108034470 |
| chr14 | 108036098 | 108036309 |
| chr14 | 108036309 | 108036494 |
| chr14 | 108170641 | 108170822 |
| chr14 | 108608675 | 108608934 |
| chr14 | 108638025 | 108638176 |
| chr14 | 108638351 | 108638629 |
| chr14 | 108746541 | 108746838 |
| chr14 | 108867859 | 108868124 |
| chr14 | 108878009 | 108878368 |
| chr14 | 108973985 | 108974377 |
| chr14 | 108974487 | 108974884 |
| chr14 | 108974884 | 108975107 |
| chr14 | 108975107 | 108975374 |
| chr14 | 108976917 | 108977353 |

|       |           |           |
|-------|-----------|-----------|
| chr14 | 108992804 | 108993355 |
| chr14 | 108998941 | 108999104 |
| chr14 | 109115461 | 109115943 |
| chr14 | 109115943 | 109116156 |
| chr14 | 109214810 | 109215242 |
| chr14 | 109443100 | 109443321 |
| chr14 | 109457632 | 109458004 |
| chr14 | 109676165 | 109676351 |
| chr14 | 109827500 | 109827718 |
| chr14 | 109834219 | 109834384 |
| chr14 | 110013180 | 110013631 |
| chr14 | 110424113 | 110424311 |
| chr14 | 110878867 | 110879056 |
| chr14 | 111674725 | 111674985 |
| chr14 | 111675851 | 111676139 |
| chr14 | 112518833 | 112519031 |
| chr14 | 113962497 | 113962674 |
| chr14 | 114027549 | 114027706 |
| chr14 | 114842410 | 114842560 |
| chr14 | 114962010 | 114962341 |
| chr14 | 115005807 | 115006014 |
| chr14 | 115017709 | 115018138 |
| chr14 | 115034326 | 115034553 |
| chr14 | 115037098 | 115037362 |
| chr14 | 115037515 | 115037720 |
| chr14 | 115037798 | 115038002 |
| chr14 | 115040266 | 115040435 |
| chr14 | 115040542 | 115040833 |
| chr14 | 115040833 | 115041419 |
| chr14 | 115041814 | 115042102 |
| chr14 | 115042102 | 115042379 |
| chr14 | 115042379 | 115042600 |
| chr14 | 115048201 | 115048396 |
| chr14 | 115048823 | 115049074 |
| chr14 | 115049121 | 115049481 |
| chr14 | 115074651 | 115074869 |
| chr14 | 115092068 | 115092424 |
| chr14 | 115092424 | 115092885 |
| chr14 | 115261399 | 115261852 |
| chr14 | 115402604 | 115402812 |
| chr14 | 115402812 | 115403025 |
| chr14 | 115417160 | 115417394 |

|       |           |           |
|-------|-----------|-----------|
| chr14 | 116301248 | 116301690 |
| chr14 | 116301710 | 116301918 |
| chr14 | 116475875 | 116476079 |
| chr14 | 116476084 | 116476385 |
| chr14 | 116514452 | 116514675 |
| chr14 | 116531674 | 116531909 |
| chr14 | 116554665 | 116554826 |
| chr14 | 116560074 | 116560285 |
| chr14 | 116590188 | 116590346 |
| chr14 | 116626111 | 116626291 |
| chr14 | 116925134 | 116925367 |
| chr14 | 116925406 | 116925615 |
| chr14 | 116925696 | 116925925 |
| chr14 | 116925925 | 116926179 |
| chr14 | 116926183 | 116926422 |
| chr14 | 116926422 | 116926670 |
| chr14 | 116926670 | 116926919 |
| chr14 | 116926919 | 116927185 |
| chr14 | 116928467 | 116928681 |
| chr14 | 116939633 | 116939836 |
| chr14 | 116975266 | 116975464 |
| chr14 | 116979250 | 116979400 |
| chr14 | 117058698 | 117059018 |
| chr14 | 117157425 | 117157755 |
| chr14 | 117386323 | 117386551 |
| chr14 | 117386551 | 117386765 |
| chr14 | 117720543 | 117720832 |
| chr14 | 117892122 | 117892331 |
| chr14 | 117919686 | 117919896 |
| chr14 | 117992937 | 117993202 |
| chr14 | 117993951 | 117994108 |
| chr14 | 117998996 | 117999177 |
| chr14 | 118001186 | 118001568 |
| chr14 | 118005773 | 118005989 |
| chr14 | 118051005 | 118051562 |
| chr14 | 118088771 | 118089120 |
| chr14 | 118089120 | 118089450 |
| chr14 | 118089450 | 118089696 |
| chr14 | 118089777 | 118090116 |
| chr14 | 118098309 | 118098607 |
| chr14 | 118099329 | 118099516 |
| chr14 | 118099679 | 118099935 |

|       |           |           |
|-------|-----------|-----------|
| chr14 | 118109747 | 118110105 |
| chr14 | 118110747 | 118110983 |
| chr14 | 118132657 | 118132992 |
| chr14 | 118136777 | 118137201 |
| chr14 | 118137201 | 118137469 |
| chr14 | 118137469 | 118137690 |
| chr14 | 118145109 | 118145577 |
| chr14 | 118145577 | 118145895 |
| chr14 | 118145895 | 118146249 |
| chr14 | 118155814 | 118155986 |
| chr14 | 118155986 | 118156066 |
| chr14 | 118175304 | 118175472 |
| chr14 | 118179179 | 118179345 |
| chr14 | 118179345 | 118179513 |
| chr14 | 118179797 | 118180034 |
| chr14 | 118180059 | 118180624 |
| chr14 | 118180906 | 118181122 |
| chr14 | 118212699 | 118213001 |
| chr14 | 118213463 | 118213679 |
| chr14 | 118214191 | 118214374 |
| chr14 | 118231010 | 118231372 |
| chr14 | 118236254 | 118236870 |
| chr14 | 118236870 | 118237314 |
| chr14 | 118382165 | 118382491 |
| chr14 | 118385619 | 118385861 |
| chr14 | 118393779 | 118393933 |
| chr14 | 118436931 | 118437210 |
| chr14 | 118443069 | 118443260 |
| chr14 | 118461953 | 118462217 |
| chr14 | 118462217 | 118462637 |
| chr14 | 118473801 | 118473976 |
| chr14 | 118511728 | 118511978 |
| chr14 | 118520845 | 118520999 |
| chr14 | 118530111 | 118530298 |
| chr14 | 118530298 | 118530479 |
| chr14 | 118547015 | 118547599 |
| chr14 | 118547723 | 118547955 |
| chr14 | 118547955 | 118548260 |
| chr14 | 118563537 | 118563847 |
| chr14 | 118566217 | 118566837 |
| chr14 | 118566951 | 118567106 |
| chr14 | 118591590 | 118591830 |

|       |           |           |
|-------|-----------|-----------|
| chr14 | 118593629 | 118593781 |
| chr14 | 118606161 | 118606443 |
| chr14 | 118616806 | 118617020 |
| chr14 | 118635376 | 118635709 |
| chr14 | 118635709 | 118636010 |
| chr14 | 118638435 | 118638693 |
| chr14 | 118642943 | 118643280 |
| chr14 | 118643280 | 118643556 |
| chr14 | 118656047 | 118656206 |
| chr14 | 118658116 | 118658783 |
| chr14 | 118662041 | 118662328 |
| chr14 | 118663773 | 118663926 |
| chr14 | 118666000 | 118666158 |
| chr14 | 118667499 | 118668066 |
| chr14 | 118674363 | 118674616 |
| chr14 | 118674725 | 118675382 |
| chr14 | 118678533 | 118678948 |
| chr14 | 118681216 | 118681405 |
| chr14 | 118682785 | 118682935 |
| chr14 | 118698408 | 118698592 |
| chr14 | 118700370 | 118700553 |
| chr14 | 118700642 | 118700792 |
| chr14 | 118702306 | 118702518 |
| chr14 | 118705761 | 118706095 |
| chr14 | 118706095 | 118706396 |
| chr14 | 118706396 | 118706892 |
| chr14 | 118709729 | 118710223 |
| chr14 | 118713401 | 118713811 |
| chr14 | 118716342 | 118716736 |
| chr14 | 118733231 | 118733540 |
| chr14 | 118735109 | 118735441 |
| chr14 | 118750463 | 118750831 |
| chr14 | 118750831 | 118751080 |
| chr14 | 118751154 | 118751734 |
| chr14 | 118756190 | 118756389 |
| chr14 | 118763942 | 118764186 |
| chr14 | 118764186 | 118764423 |
| chr14 | 118765302 | 118765826 |
| chr14 | 118766451 | 118766767 |
| chr14 | 118768087 | 118768351 |
| chr14 | 118773217 | 118773549 |
| chr14 | 118775162 | 118775312 |

|       |           |           |
|-------|-----------|-----------|
| chr14 | 118801977 | 118802745 |
| chr14 | 118808270 | 118808486 |
| chr14 | 118811389 | 118811566 |
| chr14 | 118816587 | 118816743 |
| chr14 | 118817694 | 118817930 |
| chr14 | 118820154 | 118820431 |
| chr14 | 118823440 | 118823592 |
| chr14 | 118908945 | 118909095 |
| chr14 | 118910423 | 118910618 |
| chr14 | 118910670 | 118910969 |
| chr14 | 118922504 | 118922656 |
| chr14 | 118922791 | 118923198 |
| chr14 | 118925042 | 118925362 |
| chr14 | 118925397 | 118925573 |
| chr14 | 118930883 | 118931061 |
| chr14 | 118937458 | 118938070 |
| chr14 | 118938070 | 118938440 |
| chr14 | 118948990 | 118949250 |
| chr14 | 118986806 | 118986957 |
| chr14 | 118987400 | 118987562 |
| chr14 | 118988184 | 118988393 |
| chr14 | 119007195 | 119007345 |
| chr14 | 119007369 | 119007805 |
| chr14 | 119013099 | 119013334 |
| chr14 | 119027203 | 119027474 |
| chr14 | 119027742 | 119027950 |
| chr14 | 119040327 | 119040570 |
| chr14 | 119043833 | 119044073 |
| chr14 | 119099264 | 119099497 |
| chr14 | 119163145 | 119163305 |
| chr14 | 119194014 | 119194205 |
| chr14 | 119286873 | 119287082 |
| chr14 | 119616175 | 119616335 |
| chr14 | 119877391 | 119877541 |
| chr14 | 119949562 | 119949773 |
| chr14 | 119950222 | 119950463 |
| chr14 | 119962043 | 119962208 |
| chr14 | 120076277 | 120076487 |
| chr14 | 120082839 | 120083089 |
| chr14 | 120104098 | 120104303 |
| chr14 | 120104303 | 120104500 |
| chr14 | 120127311 | 120127825 |

|       |           |           |
|-------|-----------|-----------|
| chr14 | 120127825 | 120128169 |
| chr14 | 120128207 | 120128420 |
| chr14 | 120137591 | 120137901 |
| chr14 | 120137901 | 120138212 |
| chr14 | 120144589 | 120144872 |
| chr14 | 120164134 | 120164458 |
| chr14 | 120165356 | 120165642 |
| chr14 | 120171713 | 120172187 |
| chr14 | 120172187 | 120172430 |
| chr14 | 120172835 | 120172998 |
| chr14 | 120175864 | 120176068 |
| chr14 | 120189654 | 120189881 |
| chr14 | 120190105 | 120190498 |
| chr14 | 120211841 | 120212091 |
| chr14 | 120259317 | 120259786 |
| chr14 | 120275432 | 120275948 |
| chr14 | 120277120 | 120277403 |
| chr14 | 120278312 | 120278772 |
| chr14 | 120278827 | 120279241 |
| chr14 | 120284630 | 120284847 |
| chr14 | 120285032 | 120285320 |
| chr14 | 120288510 | 120288722 |
| chr14 | 120292238 | 120292436 |
| chr14 | 120292510 | 120293247 |
| chr14 | 120299715 | 120300252 |
| chr14 | 120303170 | 120303437 |
| chr14 | 120307906 | 120308158 |
| chr14 | 120308158 | 120308392 |
| chr14 | 120308392 | 120308611 |
| chr14 | 120309802 | 120310060 |
| chr14 | 120310161 | 120310446 |
| chr14 | 120312958 | 120313496 |
| chr14 | 120313501 | 120313799 |
| chr14 | 120318360 | 120318694 |
| chr14 | 120319854 | 120320005 |
| chr14 | 120322746 | 120323064 |
| chr14 | 120323064 | 120323475 |
| chr14 | 120324229 | 120324472 |
| chr14 | 120324472 | 120324722 |
| chr14 | 120324930 | 120325133 |
| chr14 | 120325672 | 120325907 |
| chr14 | 120325907 | 120326210 |

|       |           |           |
|-------|-----------|-----------|
| chr14 | 120330414 | 120330885 |
| chr14 | 120336541 | 120336767 |
| chr14 | 120337677 | 120337851 |
| chr14 | 120341089 | 120341244 |
| chr14 | 120341780 | 120342267 |
| chr14 | 120342267 | 120342567 |
| chr14 | 120342567 | 120342827 |
| chr14 | 120350439 | 120350591 |
| chr14 | 120355149 | 120355318 |
| chr14 | 120363496 | 120363678 |
| chr14 | 120370850 | 120371093 |
| chr14 | 120371803 | 120371963 |
| chr14 | 120373088 | 120373362 |
| chr14 | 120373586 | 120374099 |
| chr14 | 120398165 | 120398616 |
| chr14 | 120405003 | 120405595 |
| chr14 | 120405658 | 120405916 |
| chr14 | 120406181 | 120406591 |
| chr14 | 120406822 | 120407148 |
| chr14 | 120413365 | 120413591 |
| chr14 | 120413591 | 120413824 |
| chr14 | 120427577 | 120427738 |
| chr14 | 120429061 | 120429218 |
| chr14 | 120433783 | 120434345 |
| chr14 | 120439996 | 120440284 |
| chr14 | 120440726 | 120441141 |
| chr14 | 120469127 | 120469502 |
| chr14 | 120469502 | 120469781 |
| chr14 | 120477336 | 120477616 |
| chr14 | 120477616 | 120477777 |
| chr14 | 120477777 | 120478097 |
| chr14 | 120478097 | 120478469 |
| chr14 | 120478469 | 120478796 |
| chr14 | 120518787 | 120518971 |
| chr14 | 120520914 | 120521163 |
| chr14 | 120568009 | 120568376 |
| chr14 | 120571361 | 120571529 |
| chr14 | 120626580 | 120627190 |
| chr14 | 120628617 | 120628833 |
| chr14 | 120636672 | 120637029 |
| chr14 | 120637029 | 120637363 |
| chr14 | 120637430 | 120637652 |



|       |           |           |
|-------|-----------|-----------|
| chr14 | 120637802 | 120638235 |
| chr14 | 120660274 | 120660490 |
| chr14 | 120669584 | 120670072 |
| chr14 | 120685272 | 120685426 |
| chr14 | 120685426 | 120685584 |
| chr14 | 120686810 | 120687139 |
| chr14 | 120815232 | 120815510 |
| chr14 | 120830347 | 120830845 |
| chr14 | 120831833 | 120832209 |
| chr14 | 120832217 | 120832695 |
| chr14 | 120846160 | 120846466 |
| chr14 | 120846466 | 120846867 |
| chr14 | 120847161 | 120847382 |
| chr14 | 120857905 | 120858292 |
| chr14 | 120861315 | 120861571 |
| chr14 | 120867838 | 120868293 |
| chr14 | 120868434 | 120868913 |
| chr14 | 120875237 | 120875437 |
| chr14 | 120880053 | 120880294 |
| chr14 | 120880636 | 120880881 |
| chr14 | 120880947 | 120881428 |
| chr14 | 120887888 | 120888126 |
| chr14 | 120888126 | 120888351 |
| chr14 | 120888587 | 120889042 |
| chr14 | 120910296 | 120910729 |
| chr14 | 120910729 | 120911017 |
| chr14 | 120911017 | 120911328 |
| chr14 | 120911424 | 120911772 |
| chr14 | 120921824 | 120922178 |
| chr14 | 120925837 | 120925989 |
| chr14 | 120926079 | 120926345 |
| chr14 | 120949086 | 120949314 |
| chr14 | 120952567 | 120952746 |
| chr14 | 120955522 | 120955784 |
| chr14 | 120971375 | 120971535 |
| chr14 | 120977444 | 120977594 |
| chr14 | 120995337 | 120995598 |
| chr14 | 120996181 | 120996564 |
| chr14 | 121000735 | 121001048 |
| chr14 | 121025485 | 121025643 |
| chr14 | 121034931 | 121035190 |
| chr14 | 121035192 | 121035561 |

|       |           |           |
|-------|-----------|-----------|
| chr14 | 121035561 | 121035898 |
| chr14 | 121037281 | 121037677 |
| chr14 | 121044237 | 121044528 |
| chr14 | 121050744 | 121050981 |
| chr14 | 121050985 | 121051336 |
| chr14 | 121051336 | 121051637 |
| chr14 | 121059301 | 121059518 |
| chr14 | 121073545 | 121073805 |
| chr14 | 121082371 | 121082590 |
| chr14 | 121085146 | 121085377 |
| chr14 | 121085377 | 121085580 |
| chr14 | 121098008 | 121098327 |
| chr14 | 121098327 | 121098581 |
| chr14 | 121099172 | 121099443 |
| chr14 | 121105036 | 121105215 |
| chr14 | 121118906 | 121119167 |
| chr14 | 121127960 | 121128174 |
| chr14 | 121136931 | 121137081 |
| chr14 | 121137141 | 121137692 |
| chr14 | 121159877 | 121160115 |
| chr14 | 121164896 | 121165147 |
| chr14 | 121177848 | 121178128 |
| chr14 | 121178231 | 121178538 |
| chr14 | 121182926 | 121183170 |
| chr14 | 121183170 | 121183430 |
| chr14 | 121183430 | 121183718 |
| chr14 | 121183718 | 121183996 |
| chr14 | 121189984 | 121190154 |
| chr14 | 121190359 | 121191000 |
| chr14 | 121191683 | 121191849 |
| chr14 | 121192386 | 121192619 |
| chr14 | 121192619 | 121192877 |
| chr14 | 121199905 | 121200151 |
| chr14 | 121217234 | 121217429 |
| chr14 | 121223814 | 121223974 |
| chr14 | 121227077 | 121227296 |
| chr14 | 121238767 | 121239246 |
| chr14 | 121239246 | 121239839 |
| chr14 | 121245877 | 121246415 |
| chr14 | 121247212 | 121247367 |
| chr14 | 121247465 | 121247728 |
| chr14 | 121251125 | 121251446 |

|       |           |           |
|-------|-----------|-----------|
| chr14 | 121259897 | 121260115 |
| chr14 | 121264604 | 121264778 |
| chr14 | 121268343 | 121268565 |
| chr14 | 121273729 | 121273891 |
| chr14 | 121278423 | 121278600 |
| chr14 | 121278955 | 121279163 |
| chr14 | 121279163 | 121279579 |
| chr14 | 121284591 | 121284741 |
| chr14 | 121285480 | 121285661 |
| chr14 | 121287506 | 121287677 |
| chr14 | 121287677 | 121287830 |
| chr14 | 121292135 | 121292420 |
| chr14 | 121292420 | 121292721 |
| chr14 | 121304598 | 121304789 |
| chr14 | 121310021 | 121310171 |
| chr14 | 121310363 | 121310647 |
| chr14 | 121310728 | 121310878 |
| chr14 | 121311540 | 121311761 |
| chr14 | 121314947 | 121315216 |
| chr14 | 121315583 | 121315925 |
| chr14 | 121340170 | 121340349 |
| chr14 | 121344962 | 121345224 |
| chr14 | 121346170 | 121346358 |
| chr14 | 121346358 | 121346586 |
| chr14 | 121346703 | 121347087 |
| chr14 | 121356577 | 121356728 |
| chr14 | 121361623 | 121362339 |
| chr14 | 121362384 | 121362543 |
| chr14 | 121371875 | 121372322 |
| chr14 | 121372343 | 121372998 |
| chr14 | 121378272 | 121378711 |
| chr14 | 121378711 | 121379113 |
| chr14 | 121379113 | 121379408 |
| chr14 | 121379408 | 121379675 |
| chr14 | 121379675 | 121380081 |
| chr14 | 121383974 | 121384272 |
| chr14 | 121385512 | 121385783 |
| chr14 | 121391654 | 121392556 |
| chr14 | 121399656 | 121400131 |
| chr14 | 121403058 | 121403376 |
| chr14 | 121406808 | 121407100 |
| chr14 | 121413842 | 121414080 |

|       |           |           |
|-------|-----------|-----------|
| chr14 | 121417648 | 121417962 |
| chr14 | 121425249 | 121425573 |
| chr14 | 121426917 | 121427136 |
| chr14 | 121429921 | 121430237 |
| chr14 | 121435753 | 121436101 |
| chr14 | 121436101 | 121436384 |
| chr14 | 121436905 | 121437232 |
| chr14 | 121437232 | 121437533 |
| chr14 | 121445242 | 121445546 |
| chr14 | 121447102 | 121447485 |
| chr14 | 121451005 | 121451210 |
| chr14 | 121451210 | 121451500 |
| chr14 | 121455654 | 121455828 |
| chr14 | 121489724 | 121489883 |
| chr14 | 121500720 | 121500965 |
| chr14 | 121505232 | 121505428 |
| chr14 | 121513847 | 121513997 |
| chr14 | 121524876 | 121525069 |
| chr14 | 121525736 | 121525963 |
| chr14 | 121546656 | 121546888 |
| chr14 | 121547835 | 121548045 |
| chr14 | 121579102 | 121579320 |
| chr14 | 121580677 | 121581143 |
| chr14 | 121588508 | 121588799 |
| chr14 | 121589216 | 121589420 |
| chr14 | 121589420 | 121589665 |
| chr14 | 121589665 | 121590019 |
| chr14 | 121604195 | 121604345 |
| chr14 | 121610963 | 121611537 |
| chr14 | 121611661 | 121611900 |
| chr14 | 121624130 | 121624280 |
| chr14 | 121625785 | 121626046 |
| chr14 | 121629963 | 121630127 |
| chr14 | 121636987 | 121637190 |
| chr14 | 121679019 | 121679306 |
| chr14 | 121687396 | 121687599 |
| chr14 | 121694102 | 121694428 |
| chr14 | 121694428 | 121694730 |
| chr14 | 121698005 | 121698310 |
| chr14 | 121698310 | 121698557 |
| chr14 | 121709534 | 121709917 |
| chr14 | 121710076 | 121710531 |

|       |           |           |
|-------|-----------|-----------|
| chr14 | 121710852 | 121711054 |
| chr14 | 121711513 | 121711693 |
| chr14 | 121712218 | 121712388 |
| chr14 | 121713271 | 121713570 |
| chr14 | 121714296 | 121714665 |
| chr14 | 121716534 | 121716833 |
| chr14 | 121716833 | 121717233 |
| chr14 | 121731930 | 121732093 |
| chr14 | 121752746 | 121753017 |
| chr14 | 121758135 | 121758393 |
| chr14 | 121758393 | 121758664 |
| chr14 | 121761691 | 121761886 |
| chr14 | 121764156 | 121764647 |
| chr14 | 121797383 | 121797656 |
| chr14 | 121797656 | 121797887 |
| chr14 | 121797887 | 121798152 |
| chr14 | 121798152 | 121798486 |
| chr14 | 121798486 | 121798801 |
| chr14 | 121804562 | 121804785 |
| chr14 | 121822595 | 121822804 |
| chr14 | 121823176 | 121823331 |
| chr14 | 121824399 | 121824873 |
| chr14 | 121824873 | 121825184 |
| chr14 | 121825474 | 121825684 |
| chr14 | 121825684 | 121825914 |
| chr14 | 121825914 | 121826119 |
| chr14 | 121826206 | 121826422 |
| chr14 | 121836606 | 121836841 |
| chr14 | 121852253 | 121852412 |
| chr14 | 121852599 | 121853154 |
| chr14 | 121865243 | 121865476 |
| chr14 | 121870380 | 121870530 |
| chr14 | 121878091 | 121878754 |
| chr14 | 121878754 | 121879147 |
| chr14 | 121987373 | 121987623 |
| chr14 | 122042070 | 122042228 |
| chr14 | 122045755 | 122046094 |
| chr14 | 122047057 | 122047419 |
| chr14 | 122060456 | 122060609 |
| chr14 | 122060729 | 122061008 |
| chr14 | 122064617 | 122064860 |
| chr14 | 122104757 | 122105282 |

|       |           |           |
|-------|-----------|-----------|
| chr14 | 122106780 | 122107236 |
| chr14 | 122107236 | 122107518 |
| chr14 | 122107566 | 122107755 |
| chr14 | 122130111 | 122130395 |
| chr14 | 122170283 | 122170643 |
| chr14 | 122181395 | 122181798 |
| chr14 | 122181798 | 122182084 |
| chr14 | 122190993 | 122191227 |
| chr14 | 122209177 | 122209534 |
| chr14 | 122222780 | 122222930 |
| chr14 | 122223160 | 122223330 |
| chr14 | 122223771 | 122224053 |
| chr14 | 122249513 | 122249790 |
| chr14 | 122269940 | 122270090 |
| chr14 | 122463826 | 122464351 |
| chr14 | 122464351 | 122464652 |
| chr14 | 122464652 | 122464985 |
| chr14 | 122464985 | 122465286 |
| chr14 | 122465428 | 122465698 |
| chr14 | 122473941 | 122474384 |
| chr14 | 122474480 | 122474630 |
| chr14 | 122474829 | 122475286 |
| chr14 | 122475385 | 122475625 |
| chr14 | 122475707 | 122475932 |
| chr14 | 122476173 | 122476328 |
| chr14 | 122490764 | 122490965 |
| chr14 | 122526581 | 122526768 |
| chr14 | 122528597 | 122528774 |
| chr14 | 122533904 | 122534398 |
| chr14 | 122534398 | 122534751 |
| chr14 | 122534871 | 122535034 |
| chr14 | 122560979 | 122561349 |
| chr14 | 122565037 | 122565197 |
| chr14 | 122568886 | 122569160 |
| chr14 | 122617715 | 122618086 |
| chr14 | 122618121 | 122618609 |
| chr14 | 122691640 | 122691880 |
| chr14 | 122713821 | 122714153 |
| chr14 | 122812413 | 122812563 |
| chr14 | 122833734 | 122834030 |
| chr14 | 122834230 | 122834598 |
| chr14 | 122876259 | 122876514 |

|       |           |           |
|-------|-----------|-----------|
| chr14 | 122902898 | 122903200 |
| chr14 | 122903200 | 122903494 |
| chr14 | 122903551 | 122903779 |
| chr14 | 122903794 | 122904406 |
| chr14 | 122909654 | 122910050 |
| chr14 | 122912795 | 122913082 |
| chr14 | 122913082 | 122913566 |
| chr14 | 122951006 | 122951216 |
| chr14 | 122953399 | 122953639 |
| chr14 | 122982560 | 122982874 |
| chr14 | 122982874 | 122983215 |
| chr14 | 122983215 | 122983581 |
| chr14 | 122983634 | 122983851 |
| chr14 | 122993007 | 122993188 |
| chr14 | 123015578 | 123015802 |
| chr14 | 123015802 | 123016233 |
| chr14 | 123025415 | 123025671 |
| chr14 | 123038936 | 123039199 |
| chr14 | 123041483 | 123041829 |
| chr14 | 123051666 | 123051818 |
| chr14 | 123057093 | 123057262 |
| chr14 | 123087451 | 123087639 |
| chr14 | 123171973 | 123172176 |
| chr14 | 123173192 | 123173633 |
| chr14 | 123202468 | 123202808 |
| chr14 | 123235555 | 123235733 |
| chr14 | 123236655 | 123237086 |
| chr14 | 123237086 | 123237485 |
| chr14 | 123237670 | 123237882 |
| chr14 | 123242331 | 123242593 |
| chr14 | 123242619 | 123243201 |
| chr14 | 123243329 | 123243477 |
| chr14 | 123243477 | 123243626 |
| chr14 | 123269423 | 123269693 |
| chr14 | 123299883 | 123300346 |
| chr14 | 123312437 | 123312676 |
| chr14 | 123353051 | 123353259 |
| chr14 | 123371662 | 123371817 |
| chr14 | 123377501 | 123377667 |
| chr14 | 123451557 | 123451750 |
| chr14 | 123462121 | 123462287 |
| chr14 | 123486098 | 123486259 |

|       |           |           |
|-------|-----------|-----------|
| chr14 | 123531007 | 123531251 |
| chr14 | 123531312 | 123531592 |
| chr14 | 123533130 | 123533284 |
| chr14 | 123535646 | 123535982 |
| chr14 | 123603655 | 123603807 |
| chr14 | 123626744 | 123626972 |
| chr14 | 123661188 | 123661354 |
| chr14 | 123662201 | 123662415 |
| chr14 | 123662419 | 123662876 |
| chr14 | 123663286 | 123663617 |
| chr14 | 124167632 | 124167811 |
| chr14 | 124174181 | 124174483 |
| chr14 | 124801488 | 124801870 |
| chr14 | 124801870 | 124802308 |
| chr15 | 3129371   | 3129540   |
| chr15 | 3167544   | 3167714   |
| chr15 | 3199858   | 3200193   |
| chr15 | 3202329   | 3202555   |
| chr15 | 3204066   | 3204483   |
| chr15 | 3218742   | 3219044   |
| chr15 | 3219367   | 3219517   |
| chr15 | 3251093   | 3251342   |
| chr15 | 3251418   | 3251587   |
| chr15 | 3286894   | 3287260   |
| chr15 | 3290513   | 3290783   |
| chr15 | 3319993   | 3320240   |
| chr15 | 3356395   | 3356555   |
| chr15 | 3356573   | 3356821   |
| chr15 | 3356886   | 3357149   |
| chr15 | 3369076   | 3369317   |
| chr15 | 3383741   | 3384054   |
| chr15 | 3384680   | 3384844   |
| chr15 | 3389103   | 3389612   |
| chr15 | 3397250   | 3397740   |
| chr15 | 3397740   | 3398058   |
| chr15 | 3398091   | 3398298   |
| chr15 | 3400881   | 3401065   |
| chr15 | 3404546   | 3404697   |
| chr15 | 3429104   | 3429324   |
| chr15 | 3441528   | 3441872   |
| chr15 | 3444401   | 3445055   |
| chr15 | 3463506   | 3463898   |



|       |         |         |
|-------|---------|---------|
| chr15 | 3464865 | 3465136 |
| chr15 | 3465326 | 3465524 |
| chr15 | 3465667 | 3465926 |
| chr15 | 3465926 | 3466110 |
| chr15 | 3468499 | 3468738 |
| chr15 | 3509260 | 3509431 |
| chr15 | 3544367 | 3544601 |
| chr15 | 3559623 | 3559773 |
| chr15 | 3581864 | 3582037 |
| chr15 | 3582037 | 3582207 |
| chr15 | 3582207 | 3582409 |
| chr15 | 3582500 | 3582818 |
| chr15 | 3582920 | 3583348 |
| chr15 | 3583348 | 3583718 |
| chr15 | 3587871 | 3588350 |
| chr15 | 3631498 | 3631706 |
| chr15 | 3644421 | 3644625 |
| chr15 | 3644625 | 3644810 |
| chr15 | 3647664 | 3647914 |
| chr15 | 3648294 | 3648651 |
| chr15 | 3666995 | 3667175 |
| chr15 | 3707497 | 3707725 |
| chr15 | 3707725 | 3707999 |
| chr15 | 3725347 | 3725561 |
| chr15 | 3743116 | 3743488 |
| chr15 | 3746356 | 3746513 |
| chr15 | 3875625 | 3875781 |
| chr15 | 3878384 | 3878828 |
| chr15 | 3878924 | 3879211 |
| chr15 | 3905424 | 3905998 |
| chr15 | 3938218 | 3938373 |
| chr15 | 3940655 | 3940834 |
| chr15 | 3958061 | 3958310 |
| chr15 | 3978976 | 3979392 |
| chr15 | 3979392 | 3979727 |
| chr15 | 3988072 | 3988267 |
| chr15 | 3995369 | 3995721 |
| chr15 | 3995721 | 3996171 |
| chr15 | 3996171 | 3996478 |
| chr15 | 4026278 | 4026765 |
| chr15 | 4026765 | 4027065 |
| chr15 | 4027065 | 4027300 |

|       |         |         |
|-------|---------|---------|
| chr15 | 4027300 | 4027561 |
| chr15 | 4027918 | 4028140 |
| chr15 | 4032738 | 4032893 |
| chr15 | 4033008 | 4033218 |
| chr15 | 4033218 | 4033529 |
| chr15 | 4033529 | 4034169 |
| chr15 | 4043030 | 4043180 |
| chr15 | 4043218 | 4043425 |
| chr15 | 4051706 | 4051860 |
| chr15 | 4060304 | 4060477 |
| chr15 | 4139628 | 4139790 |
| chr15 | 4167937 | 4168422 |
| chr15 | 4168906 | 4169066 |
| chr15 | 4169218 | 4169651 |
| chr15 | 4246928 | 4247320 |
| chr15 | 4247583 | 4248059 |
| chr15 | 4264605 | 4264879 |
| chr15 | 4375506 | 4375719 |
| chr15 | 4561541 | 4561697 |
| chr15 | 4642865 | 4643211 |
| chr15 | 4836352 | 4836580 |
| chr15 | 4926118 | 4926288 |
| chr15 | 4964318 | 4964489 |
| chr15 | 4980460 | 4980721 |
| chr15 | 4987095 | 4987368 |
| chr15 | 5086277 | 5086429 |
| chr15 | 5106412 | 5106576 |
| chr15 | 5106576 | 5106760 |
| chr15 | 5107812 | 5108006 |
| chr15 | 5108031 | 5108216 |
| chr15 | 5108233 | 5108434 |
| chr15 | 5108434 | 5108638 |
| chr15 | 5108646 | 5108888 |
| chr15 | 5108890 | 5109050 |
| chr15 | 5116006 | 5116467 |
| chr15 | 5116467 | 5116698 |
| chr15 | 5116698 | 5116955 |
| chr15 | 5116955 | 5117129 |
| chr15 | 5122046 | 5122320 |
| chr15 | 5126508 | 5126799 |
| chr15 | 5127575 | 5127797 |
| chr15 | 5129275 | 5129749 |

|       |         |         |
|-------|---------|---------|
| chr15 | 5134221 | 5134451 |
| chr15 | 5138057 | 5138318 |
| chr15 | 5143341 | 5143938 |
| chr15 | 5143938 | 5144220 |
| chr15 | 5144220 | 5144455 |
| chr15 | 5145597 | 5145895 |
| chr15 | 5185037 | 5185293 |
| chr15 | 5185293 | 5185614 |
| chr15 | 5185614 | 5185962 |
| chr15 | 5185962 | 5186281 |
| chr15 | 5193970 | 5194155 |
| chr15 | 5194155 | 5194476 |
| chr15 | 5194476 | 5194856 |
| chr15 | 5195927 | 5196271 |
| chr15 | 5196271 | 5196561 |
| chr15 | 5216526 | 5216803 |
| chr15 | 5220359 | 5220927 |
| chr15 | 5221038 | 5221497 |
| chr15 | 5235494 | 5235957 |
| chr15 | 5235957 | 5236125 |
| chr15 | 5236592 | 5236842 |
| chr15 | 5243856 | 5244138 |
| chr15 | 5244138 | 5244513 |
| chr15 | 5244513 | 5244932 |
| chr15 | 5266224 | 5266374 |
| chr15 | 5276493 | 5276643 |
| chr15 | 5277153 | 5277394 |
| chr15 | 5315215 | 5315390 |
| chr15 | 5315749 | 5315999 |
| chr15 | 5330680 | 5330960 |
| chr15 | 5330960 | 5331183 |
| chr15 | 5331183 | 5331401 |
| chr15 | 5335883 | 5336175 |
| chr15 | 5355435 | 5355819 |
| chr15 | 5414394 | 5414807 |
| chr15 | 5418584 | 5418787 |
| chr15 | 5422478 | 5422732 |
| chr15 | 5446504 | 5446667 |
| chr15 | 5459164 | 5459409 |
| chr15 | 5461768 | 5462029 |
| chr15 | 5462163 | 5462324 |
| chr15 | 5462528 | 5462697 |

|       |         |         |
|-------|---------|---------|
| chr15 | 5462764 | 5463039 |
| chr15 | 5475446 | 5475731 |
| chr15 | 5494933 | 5495706 |
| chr15 | 5495779 | 5495943 |
| chr15 | 5505230 | 5505491 |
| chr15 | 5507604 | 5508024 |
| chr15 | 5514197 | 5514491 |
| chr15 | 5528704 | 5529034 |
| chr15 | 5537277 | 5537798 |
| chr15 | 5538842 | 5538992 |
| chr15 | 5539359 | 5539611 |
| chr15 | 5539611 | 5539956 |
| chr15 | 5546537 | 5546752 |
| chr15 | 5579635 | 5579912 |
| chr15 | 5624413 | 5624569 |
| chr15 | 5674976 | 5675248 |
| chr15 | 5675419 | 5675974 |
| chr15 | 5692138 | 5692392 |
| chr15 | 5900943 | 5901184 |
| chr15 | 5915348 | 5915567 |
| chr15 | 5919388 | 5919541 |
| chr15 | 5966585 | 5966735 |
| chr15 | 6016621 | 6016792 |
| chr15 | 6028331 | 6028717 |
| chr15 | 6044510 | 6044816 |
| chr15 | 6055118 | 6055341 |
| chr15 | 6056916 | 6057175 |
| chr15 | 6059949 | 6060138 |
| chr15 | 6071949 | 6072169 |
| chr15 | 6080826 | 6081038 |
| chr15 | 6209379 | 6209621 |
| chr15 | 6213468 | 6213631 |
| chr15 | 6216948 | 6217128 |
| chr15 | 6237714 | 6237932 |
| chr15 | 6238262 | 6238493 |
| chr15 | 6278671 | 6278826 |
| chr15 | 6316840 | 6317025 |
| chr15 | 6319427 | 6319756 |
| chr15 | 6325621 | 6325781 |
| chr15 | 6325928 | 6326264 |
| chr15 | 6346358 | 6346531 |
| chr15 | 6386334 | 6386709 |

|       |         |         |
|-------|---------|---------|
| chr15 | 6386709 | 6386976 |
| chr15 | 6390649 | 6391018 |
| chr15 | 6391104 | 6391327 |
| chr15 | 6395971 | 6396290 |
| chr15 | 6411342 | 6411666 |
| chr15 | 6435878 | 6436118 |
| chr15 | 6449020 | 6449215 |
| chr15 | 6492291 | 6492828 |
| chr15 | 6500881 | 6501173 |
| chr15 | 6525489 | 6525646 |
| chr15 | 6527278 | 6527435 |
| chr15 | 6532593 | 6532783 |
| chr15 | 6539994 | 6540555 |
| chr15 | 6554788 | 6555086 |
| chr15 | 6555586 | 6555906 |
| chr15 | 6564939 | 6565513 |
| chr15 | 6570967 | 6571208 |
| chr15 | 6574281 | 6574627 |
| chr15 | 6574627 | 6575011 |
| chr15 | 6607867 | 6608123 |
| chr15 | 6608123 | 6608387 |
| chr15 | 6608387 | 6608638 |
| chr15 | 6610942 | 6611200 |
| chr15 | 6611200 | 6611386 |
| chr15 | 6611386 | 6611574 |
| chr15 | 6621416 | 6621591 |
| chr15 | 6622567 | 6622838 |
| chr15 | 6625530 | 6625818 |
| chr15 | 6625829 | 6626071 |
| chr15 | 6626152 | 6626555 |
| chr15 | 6635271 | 6635538 |
| chr15 | 6635569 | 6635719 |
| chr15 | 6645677 | 6646029 |
| chr15 | 6646029 | 6646334 |
| chr15 | 6648806 | 6649076 |
| chr15 | 6649076 | 6649351 |
| chr15 | 6654293 | 6654601 |
| chr15 | 6682059 | 6682272 |
| chr15 | 6683137 | 6683520 |
| chr15 | 6683594 | 6683813 |
| chr15 | 6694298 | 6694492 |
| chr15 | 6700917 | 6701250 |

|       |         |         |
|-------|---------|---------|
| chr15 | 6707491 | 6707943 |
| chr15 | 6707943 | 6708219 |
| chr15 | 6708219 | 6708547 |
| chr15 | 6708547 | 6708868 |
| chr15 | 6708868 | 6709129 |
| chr15 | 6709129 | 6709386 |
| chr15 | 6721853 | 6722049 |
| chr15 | 6725559 | 6725757 |
| chr15 | 6726218 | 6726455 |
| chr15 | 6726455 | 6726870 |
| chr15 | 6750286 | 6750436 |
| chr15 | 6750620 | 6750808 |
| chr15 | 6777369 | 6777623 |
| chr15 | 6801410 | 6801646 |
| chr15 | 6810646 | 6810847 |
| chr15 | 6840252 | 6840522 |
| chr15 | 6849730 | 6849900 |
| chr15 | 6849933 | 6850446 |
| chr15 | 6857515 | 6857790 |
| chr15 | 6872109 | 6872443 |
| chr15 | 6873493 | 6873810 |
| chr15 | 6873875 | 6874424 |
| chr15 | 6874424 | 6874678 |
| chr15 | 6874678 | 6874893 |
| chr15 | 6882830 | 6883010 |
| chr15 | 6883894 | 6884150 |
| chr15 | 6905640 | 6905798 |
| chr15 | 6909709 | 6910017 |
| chr15 | 6986238 | 6986550 |
| chr15 | 7012975 | 7013237 |
| chr15 | 7015144 | 7015305 |
| chr15 | 7017401 | 7017725 |
| chr15 | 7037621 | 7037862 |
| chr15 | 7075287 | 7075551 |
| chr15 | 7129179 | 7129453 |
| chr15 | 7129453 | 7129682 |
| chr15 | 7129682 | 7130027 |
| chr15 | 7134554 | 7134706 |
| chr15 | 7134780 | 7134948 |
| chr15 | 7136237 | 7136525 |
| chr15 | 7137537 | 7137782 |
| chr15 | 7137782 | 7138075 |

|       |         |         |
|-------|---------|---------|
| chr15 | 7172962 | 7173212 |
| chr15 | 7173392 | 7173647 |
| chr15 | 7208159 | 7208622 |
| chr15 | 7213677 | 7214024 |
| chr15 | 7214893 | 7215149 |
| chr15 | 7215821 | 7216071 |
| chr15 | 7216581 | 7216981 |
| chr15 | 7216981 | 7217419 |
| chr15 | 7226251 | 7226595 |
| chr15 | 7263881 | 7264186 |
| chr15 | 7297613 | 7297996 |
| chr15 | 7298020 | 7298295 |
| chr15 | 7408851 | 7409097 |
| chr15 | 7459979 | 7460196 |
| chr15 | 7460196 | 7460514 |
| chr15 | 7460514 | 7460931 |
| chr15 | 7480442 | 7480614 |
| chr15 | 7481028 | 7481264 |
| chr15 | 7493049 | 7493355 |
| chr15 | 7493355 | 7493746 |
| chr15 | 7493925 | 7494148 |
| chr15 | 7497180 | 7497330 |
| chr15 | 7501110 | 7501328 |
| chr15 | 7501611 | 7501763 |
| chr15 | 7537882 | 7538213 |
| chr15 | 7540063 | 7540339 |
| chr15 | 7548078 | 7548344 |
| chr15 | 7553274 | 7553544 |
| chr15 | 7553544 | 7554057 |
| chr15 | 7555913 | 7556184 |
| chr15 | 7567758 | 7568094 |
| chr15 | 7574328 | 7574600 |
| chr15 | 7596977 | 7597291 |
| chr15 | 7597291 | 7597733 |
| chr15 | 7597733 | 7598051 |
| chr15 | 7598510 | 7598859 |
| chr15 | 7609824 | 7610117 |
| chr15 | 7641424 | 7641764 |
| chr15 | 7652913 | 7653063 |
| chr15 | 7661307 | 7661573 |
| chr15 | 7661573 | 7661811 |
| chr15 | 7676609 | 7676971 |

|       |         |         |
|-------|---------|---------|
| chr15 | 7678742 | 7679151 |
| chr15 | 7680411 | 7680628 |
| chr15 | 7691339 | 7691660 |
| chr15 | 7692625 | 7692862 |
| chr15 | 7693115 | 7693409 |
| chr15 | 7693724 | 7694061 |
| chr15 | 7694061 | 7694350 |
| chr15 | 7700013 | 7700181 |
| chr15 | 7715895 | 7716177 |
| chr15 | 7716214 | 7716798 |
| chr15 | 7740929 | 7741212 |
| chr15 | 7750007 | 7750397 |
| chr15 | 7750397 | 7750624 |
| chr15 | 7750624 | 7750891 |
| chr15 | 7776150 | 7776332 |
| chr15 | 7779426 | 7779731 |
| chr15 | 7779731 | 7779998 |
| chr15 | 7801057 | 7801244 |
| chr15 | 7801244 | 7801444 |
| chr15 | 7801444 | 7801675 |
| chr15 | 7801675 | 7801884 |
| chr15 | 7801884 | 7802156 |
| chr15 | 7802156 | 7802405 |
| chr15 | 7802405 | 7802636 |
| chr15 | 7802636 | 7802895 |
| chr15 | 7810233 | 7810453 |
| chr15 | 7810498 | 7811089 |
| chr15 | 7811094 | 7811263 |
| chr15 | 7812789 | 7813110 |
| chr15 | 7813110 | 7813321 |
| chr15 | 7813321 | 7813565 |
| chr15 | 7813667 | 7813853 |
| chr15 | 7838440 | 7838867 |
| chr15 | 7838867 | 7839261 |
| chr15 | 7839741 | 7839905 |
| chr15 | 7842460 | 7842716 |
| chr15 | 7842890 | 7843047 |
| chr15 | 7846499 | 7846931 |
| chr15 | 7857332 | 7857777 |
| chr15 | 7862652 | 7862938 |
| chr15 | 7862938 | 7863349 |
| chr15 | 7863349 | 7863723 |



|       |         |         |
|-------|---------|---------|
| chr15 | 7877602 | 7878470 |
| chr15 | 7886479 | 7887319 |
| chr15 | 7889933 | 7890251 |
| chr15 | 7890318 | 7890602 |
| chr15 | 7891679 | 7891836 |
| chr15 | 7891988 | 7892230 |
| chr15 | 7894581 | 7894734 |
| chr15 | 7897769 | 7898148 |
| chr15 | 7898148 | 7898600 |
| chr15 | 7919459 | 7919633 |
| chr15 | 7925496 | 7925669 |
| chr15 | 7931449 | 7932088 |
| chr15 | 7939813 | 7940027 |
| chr15 | 7962856 | 7963217 |
| chr15 | 7998893 | 7999080 |
| chr15 | 8006129 | 8006443 |
| chr15 | 8035119 | 8035270 |
| chr15 | 8039965 | 8040115 |
| chr15 | 8050992 | 8051478 |
| chr15 | 8051478 | 8051718 |
| chr15 | 8067288 | 8067494 |
| chr15 | 8067494 | 8067678 |
| chr15 | 8067678 | 8067908 |
| chr15 | 8086954 | 8087127 |
| chr15 | 8088775 | 8088970 |
| chr15 | 8097911 | 8098176 |
| chr15 | 8098710 | 8099082 |
| chr15 | 8099082 | 8099416 |
| chr15 | 8108736 | 8109022 |
| chr15 | 8109022 | 8109405 |
| chr15 | 8109405 | 8109674 |
| chr15 | 8129365 | 8129600 |
| chr15 | 8131885 | 8132058 |
| chr15 | 8168455 | 8168884 |
| chr15 | 8168884 | 8169189 |
| chr15 | 8169189 | 8169513 |
| chr15 | 8169524 | 8169761 |
| chr15 | 8176315 | 8176973 |
| chr15 | 8189583 | 8190000 |
| chr15 | 8190088 | 8190245 |
| chr15 | 8190275 | 8190519 |
| chr15 | 8190519 | 8190869 |

|       |         |         |
|-------|---------|---------|
| chr15 | 8210968 | 8211357 |
| chr15 | 8228124 | 8228344 |
| chr15 | 8263584 | 8263824 |
| chr15 | 8265669 | 8265895 |
| chr15 | 8271310 | 8271887 |
| chr15 | 8271913 | 8272422 |
| chr15 | 8277533 | 8277806 |
| chr15 | 8277815 | 8278383 |
| chr15 | 8280006 | 8280268 |
| chr15 | 8280268 | 8280421 |
| chr15 | 8284089 | 8284467 |
| chr15 | 8429456 | 8429855 |
| chr15 | 8433336 | 8433576 |
| chr15 | 8442919 | 8443102 |
| chr15 | 8443683 | 8443868 |
| chr15 | 8443868 | 8444087 |
| chr15 | 8444087 | 8444453 |
| chr15 | 8444453 | 8444825 |
| chr15 | 8444825 | 8445064 |
| chr15 | 8445064 | 8445265 |
| chr15 | 8445364 | 8445626 |
| chr15 | 8445851 | 8446250 |
| chr15 | 8446479 | 8446903 |
| chr15 | 8451118 | 8451344 |
| chr15 | 8463217 | 8463369 |
| chr15 | 8463630 | 8463922 |
| chr15 | 8511938 | 8512116 |
| chr15 | 8518304 | 8518530 |
| chr15 | 8519066 | 8519501 |
| chr15 | 8519655 | 8520020 |
| chr15 | 8568565 | 8569008 |
| chr15 | 8569008 | 8569290 |
| chr15 | 8569290 | 8569594 |
| chr15 | 8569607 | 8569763 |
| chr15 | 8569766 | 8570025 |
| chr15 | 8577601 | 8577898 |
| chr15 | 8589605 | 8589782 |
| chr15 | 8589789 | 8589989 |
| chr15 | 8600609 | 8600793 |
| chr15 | 8600793 | 8600983 |
| chr15 | 8625405 | 8625762 |
| chr15 | 8627105 | 8627375 |

|       |         |         |
|-------|---------|---------|
| chr15 | 8627375 | 8627583 |
| chr15 | 8627583 | 8627747 |
| chr15 | 8629275 | 8629507 |
| chr15 | 8710162 | 8710345 |
| chr15 | 8710345 | 8710603 |
| chr15 | 8729003 | 8729153 |
| chr15 | 8822779 | 8822952 |
| chr15 | 8882806 | 8883304 |
| chr15 | 8883309 | 8883599 |
| chr15 | 8883740 | 8883976 |
| chr15 | 8896923 | 8897194 |
| chr15 | 8963414 | 8963628 |
| chr15 | 8992234 | 8992440 |
| chr15 | 8994746 | 8995232 |
| chr15 | 8995527 | 8995930 |
| chr15 | 9015593 | 9016074 |
| chr15 | 9016074 | 9016415 |
| chr15 | 9070788 | 9071322 |
| chr15 | 9071322 | 9071556 |
| chr15 | 9071556 | 9071770 |
| chr15 | 9071770 | 9072005 |
| chr15 | 9072005 | 9072211 |
| chr15 | 9085074 | 9085273 |
| chr15 | 9085273 | 9085569 |
| chr15 | 9086858 | 9087115 |
| chr15 | 9093685 | 9093870 |
| chr15 | 9120083 | 9120358 |
| chr15 | 9131519 | 9131792 |
| chr15 | 9140207 | 9140599 |
| chr15 | 9140599 | 9140856 |
| chr15 | 9140856 | 9141114 |
| chr15 | 9143714 | 9143882 |
| chr15 | 9186133 | 9186293 |
| chr15 | 9229172 | 9229467 |
| chr15 | 9435604 | 9435822 |
| chr15 | 9435844 | 9436171 |
| chr15 | 9455334 | 9455549 |
| chr15 | 9471150 | 9471334 |
| chr15 | 9528242 | 9528536 |
| chr15 | 9555869 | 9556324 |
| chr15 | 9665079 | 9665342 |
| chr15 | 9737534 | 9737951 |

|       |          |          |
|-------|----------|----------|
| chr15 | 9737951  | 9738264  |
| chr15 | 9748837  | 9749011  |
| chr15 | 10054810 | 10055024 |
| chr15 | 10116826 | 10116998 |
| chr15 | 10117101 | 10117492 |
| chr15 | 10248300 | 10248641 |
| chr15 | 10261354 | 10261573 |
| chr15 | 10400495 | 10400781 |
| chr15 | 10423667 | 10423974 |
| chr15 | 10463710 | 10463868 |
| chr15 | 10469739 | 10469936 |
| chr15 | 10469938 | 10470481 |
| chr15 | 10470481 | 10470870 |
| chr15 | 10485611 | 10485767 |
| chr15 | 10485801 | 10486130 |
| chr15 | 10486130 | 10486387 |
| chr15 | 10486387 | 10486634 |
| chr15 | 10487159 | 10487314 |
| chr15 | 10487355 | 10487620 |
| chr15 | 10487620 | 10487861 |
| chr15 | 10500901 | 10501177 |
| chr15 | 10501434 | 10501671 |
| chr15 | 10514901 | 10515056 |
| chr15 | 10515192 | 10515543 |
| chr15 | 10526026 | 10526303 |
| chr15 | 10530808 | 10531126 |
| chr15 | 10549240 | 10549398 |
| chr15 | 10554414 | 10554759 |
| chr15 | 10554762 | 10554966 |
| chr15 | 10560019 | 10560437 |
| chr15 | 10565528 | 10565680 |
| chr15 | 10573104 | 10573322 |
| chr15 | 10577176 | 10577415 |
| chr15 | 10583473 | 10583910 |
| chr15 | 10588939 | 10589093 |
| chr15 | 10590428 | 10590709 |
| chr15 | 10590709 | 10590925 |
| chr15 | 10591006 | 10591356 |
| chr15 | 10591717 | 10591883 |
| chr15 | 10596343 | 10596571 |
| chr15 | 10599481 | 10599705 |
| chr15 | 10600769 | 10600929 |

|       |          |          |
|-------|----------|----------|
| chr15 | 10612145 | 10612339 |
| chr15 | 10618377 | 10618566 |
| chr15 | 10623849 | 10624134 |
| chr15 | 10636954 | 10637104 |
| chr15 | 10640652 | 10641125 |
| chr15 | 10641514 | 10641668 |
| chr15 | 10646653 | 10646989 |
| chr15 | 10646989 | 10647405 |
| chr15 | 10647855 | 10648008 |
| chr15 | 10648080 | 10648263 |
| chr15 | 10648395 | 10648720 |
| chr15 | 10649664 | 10649844 |
| chr15 | 10664509 | 10664864 |
| chr15 | 10665019 | 10665199 |
| chr15 | 10670573 | 10671066 |
| chr15 | 10672019 | 10672232 |
| chr15 | 10673207 | 10673558 |
| chr15 | 10675937 | 10676146 |
| chr15 | 10678233 | 10678440 |
| chr15 | 10685690 | 10685962 |
| chr15 | 10685962 | 10686396 |
| chr15 | 10689022 | 10689205 |
| chr15 | 10690150 | 10690428 |
| chr15 | 10690428 | 10690668 |
| chr15 | 10690847 | 10691279 |
| chr15 | 10692522 | 10692690 |
| chr15 | 10694075 | 10694330 |
| chr15 | 10696243 | 10696435 |
| chr15 | 10697009 | 10697238 |
| chr15 | 10697457 | 10697692 |
| chr15 | 10703229 | 10703396 |
| chr15 | 10706456 | 10706782 |
| chr15 | 10708693 | 10708914 |
| chr15 | 10708949 | 10709256 |
| chr15 | 10713948 | 10714493 |
| chr15 | 10714493 | 10715045 |
| chr15 | 10715045 | 10715405 |
| chr15 | 10720109 | 10720520 |
| chr15 | 10723511 | 10723890 |
| chr15 | 10724762 | 10725083 |
| chr15 | 10747391 | 10748049 |
| chr15 | 10748171 | 10748487 |

|       |          |          |
|-------|----------|----------|
| chr15 | 10748662 | 10748812 |
| chr15 | 10749817 | 10749983 |
| chr15 | 10751197 | 10751440 |
| chr15 | 10758793 | 10759282 |
| chr15 | 10759432 | 10759731 |
| chr15 | 10759787 | 10760446 |
| chr15 | 10761584 | 10761743 |
| chr15 | 10763492 | 10763806 |
| chr15 | 10763806 | 10764083 |
| chr15 | 10770325 | 10770971 |
| chr15 | 10771304 | 10771669 |
| chr15 | 10771669 | 10771955 |
| chr15 | 10779774 | 10780036 |
| chr15 | 10780038 | 10780691 |
| chr15 | 10780846 | 10781140 |
| chr15 | 10787758 | 10787993 |
| chr15 | 10791524 | 10791798 |
| chr15 | 10796703 | 10796893 |
| chr15 | 10816124 | 10816490 |
| chr15 | 10816493 | 10816649 |
| chr15 | 10818079 | 10818424 |
| chr15 | 10818424 | 10818703 |
| chr15 | 10818703 | 10819112 |
| chr15 | 10819368 | 10819575 |
| chr15 | 10819575 | 10819867 |
| chr15 | 10828612 | 10829192 |
| chr15 | 10829192 | 10829589 |
| chr15 | 10838031 | 10838228 |
| chr15 | 10846827 | 10847046 |
| chr15 | 10847181 | 10847426 |
| chr15 | 10863941 | 10864360 |
| chr15 | 10864360 | 10864754 |
| chr15 | 10864793 | 10865042 |
| chr15 | 10868932 | 10869092 |
| chr15 | 10870895 | 10871245 |
| chr15 | 10872430 | 10872592 |
| chr15 | 10872688 | 10872868 |
| chr15 | 10889967 | 10890642 |
| chr15 | 10890687 | 10890904 |
| chr15 | 10890904 | 10891146 |
| chr15 | 10897228 | 10897378 |
| chr15 | 10898399 | 10898656 |

|       |          |          |
|-------|----------|----------|
| chr15 | 10898821 | 10899003 |
| chr15 | 10921141 | 10921357 |
| chr15 | 10941202 | 10941438 |
| chr15 | 10941438 | 10941658 |
| chr15 | 10941749 | 10942254 |
| chr15 | 10969572 | 10969751 |
| chr15 | 10981327 | 10981607 |
| chr15 | 10981607 | 10981889 |
| chr15 | 10981889 | 10982136 |
| chr15 | 10982136 | 10982314 |
| chr15 | 10987156 | 10987308 |
| chr15 | 10990494 | 10990646 |
| chr15 | 10991653 | 10991861 |
| chr15 | 11008821 | 11008976 |
| chr15 | 11019386 | 11019536 |
| chr15 | 11029876 | 11030099 |
| chr15 | 11036043 | 11036210 |
| chr15 | 11036592 | 11036832 |
| chr15 | 11036968 | 11037137 |
| chr15 | 11037256 | 11037425 |
| chr15 | 11037557 | 11037714 |
| chr15 | 11037795 | 11037965 |
| chr15 | 11040184 | 11040334 |
| chr15 | 11042810 | 11043152 |
| chr15 | 11063580 | 11064159 |
| chr15 | 11064566 | 11064738 |
| chr15 | 11064826 | 11064976 |
| chr15 | 11085044 | 11085319 |
| chr15 | 11095656 | 11095863 |
| chr15 | 11103304 | 11103542 |
| chr15 | 11145674 | 11145920 |
| chr15 | 11159153 | 11159358 |
| chr15 | 11159449 | 11159715 |
| chr15 | 11320534 | 11320769 |
| chr15 | 11360891 | 11361217 |
| chr15 | 11370755 | 11370928 |
| chr15 | 11378058 | 11378216 |
| chr15 | 11380158 | 11380556 |
| chr15 | 11380746 | 11380907 |
| chr15 | 11381934 | 11382109 |
| chr15 | 11382181 | 11382331 |
| chr15 | 11390736 | 11390963 |

|       |          |          |
|-------|----------|----------|
| chr15 | 11398823 | 11399028 |
| chr15 | 11399313 | 11399578 |
| chr15 | 11399578 | 11400088 |
| chr15 | 11407445 | 11407696 |
| chr15 | 11408488 | 11408766 |
| chr15 | 11428831 | 11429335 |
| chr15 | 11454142 | 11454322 |
| chr15 | 11457357 | 11457673 |
| chr15 | 11459399 | 11459551 |
| chr15 | 11480014 | 11480228 |
| chr15 | 11509664 | 11509956 |
| chr15 | 11519063 | 11519444 |
| chr15 | 11524366 | 11524991 |
| chr15 | 11537729 | 11537893 |
| chr15 | 11539429 | 11539848 |
| chr15 | 11542360 | 11542642 |
| chr15 | 11543194 | 11543369 |
| chr15 | 11543369 | 11543588 |
| chr15 | 11543600 | 11543966 |
| chr15 | 11552009 | 11552521 |
| chr15 | 11552652 | 11552861 |
| chr15 | 11562539 | 11562772 |
| chr15 | 11565392 | 11565643 |
| chr15 | 11573543 | 11573794 |
| chr15 | 11573794 | 11574204 |
| chr15 | 11574204 | 11574783 |
| chr15 | 11580750 | 11581085 |
| chr15 | 11590398 | 11590548 |
| chr15 | 11590627 | 11590839 |
| chr15 | 11593898 | 11594124 |
| chr15 | 11615438 | 11615588 |
| chr15 | 11616702 | 11616922 |
| chr15 | 11630694 | 11630996 |
| chr15 | 11637312 | 11637677 |
| chr15 | 11660272 | 11660626 |
| chr15 | 11660626 | 11661020 |
| chr15 | 11674853 | 11675003 |
| chr15 | 11675205 | 11675546 |
| chr15 | 11693014 | 11693219 |
| chr15 | 11696793 | 11697093 |
| chr15 | 11699579 | 11699967 |
| chr15 | 11699967 | 11700337 |



|       |          |          |
|-------|----------|----------|
| chr15 | 11718830 | 11718981 |
| chr15 | 11733481 | 11733631 |
| chr15 | 11735608 | 11735760 |
| chr15 | 11744343 | 11744664 |
| chr15 | 11745335 | 11745695 |
| chr15 | 11753290 | 11753534 |
| chr15 | 11782567 | 11782797 |
| chr15 | 11783091 | 11783290 |
| chr15 | 11800491 | 11800780 |
| chr15 | 11829143 | 11829470 |
| chr15 | 11835779 | 11836291 |
| chr15 | 11836291 | 11836692 |
| chr15 | 11890816 | 11891088 |
| chr15 | 11891088 | 11891359 |
| chr15 | 11891467 | 11891699 |
| chr15 | 11895668 | 11895974 |
| chr15 | 11904147 | 11904297 |
| chr15 | 11904391 | 11904788 |
| chr15 | 11905020 | 11905431 |
| chr15 | 11905431 | 11905715 |
| chr15 | 11906089 | 11906279 |
| chr15 | 11906279 | 11906495 |
| chr15 | 11906569 | 11906978 |
| chr15 | 11906978 | 11907343 |
| chr15 | 11907347 | 11907568 |
| chr15 | 11916258 | 11916481 |
| chr15 | 11917760 | 11917930 |
| chr15 | 11930762 | 11930956 |
| chr15 | 11932917 | 11933097 |
| chr15 | 11951306 | 11951479 |
| chr15 | 11952366 | 11952532 |
| chr15 | 11952576 | 11952857 |
| chr15 | 11954326 | 11954490 |
| chr15 | 11954490 | 11954628 |
| chr15 | 11960410 | 11961072 |
| chr15 | 11964154 | 11964448 |
| chr15 | 11964586 | 11964841 |
| chr15 | 11971885 | 11972235 |
| chr15 | 11978974 | 11979124 |
| chr15 | 11980740 | 11980962 |
| chr15 | 11987775 | 11988317 |
| chr15 | 11989705 | 11989990 |

|       |          |          |
|-------|----------|----------|
| chr15 | 11995342 | 11995623 |
| chr15 | 11995623 | 11995906 |
| chr15 | 11995906 | 11996204 |
| chr15 | 11996204 | 11996457 |
| chr15 | 12003071 | 12003261 |
| chr15 | 12003311 | 12003655 |
| chr15 | 12010266 | 12010609 |
| chr15 | 12010609 | 12011127 |
| chr15 | 12030216 | 12030674 |
| chr15 | 12034370 | 12034671 |
| chr15 | 12036782 | 12036973 |
| chr15 | 12037238 | 12037659 |
| chr15 | 12047595 | 12047920 |
| chr15 | 12070685 | 12070853 |
| chr15 | 12074593 | 12074809 |
| chr15 | 12074809 | 12075019 |
| chr15 | 12075019 | 12075274 |
| chr15 | 12075274 | 12075568 |
| chr15 | 12084917 | 12085192 |
| chr15 | 12089215 | 12089620 |
| chr15 | 12091340 | 12091603 |
| chr15 | 12092168 | 12092421 |
| chr15 | 12098291 | 12098695 |
| chr15 | 12098695 | 12099211 |
| chr15 | 12099211 | 12099612 |
| chr15 | 12099612 | 12099840 |
| chr15 | 12109020 | 12109318 |
| chr15 | 12111223 | 12111769 |
| chr15 | 12112310 | 12112490 |
| chr15 | 12117248 | 12117457 |
| chr15 | 12117457 | 12117693 |
| chr15 | 12117693 | 12117931 |
| chr15 | 12117931 | 12118223 |
| chr15 | 12118223 | 12118508 |
| chr15 | 12118508 | 12118709 |
| chr15 | 12118709 | 12118924 |
| chr15 | 12119110 | 12119260 |
| chr15 | 12125235 | 12125443 |
| chr15 | 12133687 | 12133861 |
| chr15 | 12134489 | 12134934 |
| chr15 | 12135548 | 12135711 |
| chr15 | 12196436 | 12196586 |

|       |          |          |
|-------|----------|----------|
| chr15 | 12196615 | 12196801 |
| chr15 | 12196804 | 12197245 |
| chr15 | 12203482 | 12203664 |
| chr15 | 12204605 | 12204965 |
| chr15 | 12204965 | 12205191 |
| chr15 | 12205191 | 12205489 |
| chr15 | 12205489 | 12205737 |
| chr15 | 12213371 | 12213710 |
| chr15 | 12215510 | 12215848 |
| chr15 | 12215907 | 12216125 |
| chr15 | 12220812 | 12221030 |
| chr15 | 12222001 | 12222151 |
| chr15 | 12224361 | 12224514 |
| chr15 | 12230004 | 12230156 |
| chr15 | 12230225 | 12230576 |
| chr15 | 12230576 | 12230919 |
| chr15 | 12232158 | 12232472 |
| chr15 | 12232472 | 12232864 |
| chr15 | 12245677 | 12245890 |
| chr15 | 12246470 | 12246655 |
| chr15 | 12246970 | 12247175 |
| chr15 | 12248403 | 12248587 |
| chr15 | 12267858 | 12268098 |
| chr15 | 12268098 | 12268517 |
| chr15 | 12279376 | 12279660 |
| chr15 | 12279798 | 12280179 |
| chr15 | 12293685 | 12293996 |
| chr15 | 12298526 | 12298691 |
| chr15 | 12300760 | 12300910 |
| chr15 | 12301860 | 12302087 |
| chr15 | 12306237 | 12306508 |
| chr15 | 12306508 | 12306809 |
| chr15 | 12306809 | 12307128 |
| chr15 | 12307128 | 12307448 |
| chr15 | 12315257 | 12315628 |
| chr15 | 12320847 | 12321042 |
| chr15 | 12321042 | 12321278 |
| chr15 | 12321278 | 12321551 |
| chr15 | 12321551 | 12321797 |
| chr15 | 12321797 | 12321983 |
| chr15 | 12321983 | 12322198 |
| chr15 | 12334471 | 12334832 |

|       |          |          |
|-------|----------|----------|
| chr15 | 12345935 | 12346086 |
| chr15 | 12350021 | 12350193 |
| chr15 | 12351594 | 12351819 |
| chr15 | 12354486 | 12354646 |
| chr15 | 12364840 | 12365129 |
| chr15 | 12371187 | 12371622 |
| chr15 | 12375603 | 12375956 |
| chr15 | 12379062 | 12379328 |
| chr15 | 12380636 | 12380844 |
| chr15 | 12384830 | 12385134 |
| chr15 | 12396851 | 12397394 |
| chr15 | 12414793 | 12414967 |
| chr15 | 12425210 | 12425505 |
| chr15 | 12431821 | 12431994 |
| chr15 | 12473411 | 12473598 |
| chr15 | 12518751 | 12518919 |
| chr15 | 12549279 | 12549773 |
| chr15 | 12549773 | 12550316 |
| chr15 | 12567361 | 12567579 |
| chr15 | 12577022 | 12577243 |
| chr15 | 12577380 | 12577555 |
| chr15 | 12578333 | 12578486 |
| chr15 | 12586154 | 12586446 |
| chr15 | 12590135 | 12590442 |
| chr15 | 12614963 | 12615436 |
| chr15 | 12617197 | 12617660 |
| chr15 | 12622118 | 12622356 |
| chr15 | 12632137 | 12632326 |
| chr15 | 12639253 | 12639539 |
| chr15 | 12655317 | 12655481 |
| chr15 | 12702973 | 12703142 |
| chr15 | 12715393 | 12715584 |
| chr15 | 12739321 | 12739478 |
| chr15 | 12739538 | 12739817 |
| chr15 | 12739817 | 12740335 |
| chr15 | 12752161 | 12752388 |
| chr15 | 12753174 | 12753621 |
| chr15 | 12795367 | 12795701 |
| chr15 | 12799738 | 12800047 |
| chr15 | 12800211 | 12800565 |
| chr15 | 12806073 | 12806233 |
| chr15 | 12824240 | 12824559 |

|       |          |          |
|-------|----------|----------|
| chr15 | 12824559 | 12824946 |
| chr15 | 12824946 | 12825327 |
| chr15 | 12832501 | 12832759 |
| chr15 | 12833511 | 12833722 |
| chr15 | 12841241 | 12841410 |
| chr15 | 12848251 | 12848501 |
| chr15 | 12872561 | 12872820 |
| chr15 | 12872947 | 12873419 |
| chr15 | 12936432 | 12936594 |
| chr15 | 12939231 | 12939430 |
| chr15 | 12964861 | 12965354 |
| chr15 | 12965354 | 12965631 |
| chr15 | 13001617 | 13001851 |
| chr15 | 13010369 | 13010625 |
| chr15 | 13015393 | 13015557 |
| chr15 | 13046758 | 13047015 |
| chr15 | 13047015 | 13047283 |
| chr15 | 13047283 | 13047640 |
| chr15 | 13077018 | 13077173 |
| chr15 | 13088685 | 13088991 |
| chr15 | 13090333 | 13090700 |
| chr15 | 13095033 | 13095210 |
| chr15 | 13107145 | 13107498 |
| chr15 | 13130289 | 13130444 |
| chr15 | 13134177 | 13134388 |
| chr15 | 13167970 | 13168196 |
| chr15 | 13171880 | 13172050 |
| chr15 | 13172372 | 13172579 |
| chr15 | 13172579 | 13172833 |
| chr15 | 13172972 | 13173457 |
| chr15 | 13173457 | 13173842 |
| chr15 | 13193059 | 13193533 |
| chr15 | 13209996 | 13210635 |
| chr15 | 13226496 | 13226755 |
| chr15 | 13236689 | 13236883 |
| chr15 | 13236926 | 13237361 |
| chr15 | 13237361 | 13237838 |
| chr15 | 13237838 | 13238120 |
| chr15 | 13238120 | 13238324 |
| chr15 | 13243602 | 13243899 |
| chr15 | 13244339 | 13244697 |
| chr15 | 13245894 | 13246400 |

|       |          |          |
|-------|----------|----------|
| chr15 | 13258903 | 13259053 |
| chr15 | 13292227 | 13292698 |
| chr15 | 13347635 | 13347790 |
| chr15 | 13350395 | 13350587 |
| chr15 | 13366110 | 13366308 |
| chr15 | 13366577 | 13366950 |
| chr15 | 13367333 | 13367639 |
| chr15 | 13367639 | 13367915 |
| chr15 | 13367989 | 13368166 |
| chr15 | 13368623 | 13368873 |
| chr15 | 13368884 | 13369053 |
| chr15 | 13383357 | 13383953 |
| chr15 | 13384882 | 13385202 |
| chr15 | 13431192 | 13431396 |
| chr15 | 13431396 | 13431617 |
| chr15 | 13448952 | 13449103 |
| chr15 | 13495847 | 13496028 |
| chr15 | 13549570 | 13549759 |
| chr15 | 13712088 | 13712314 |
| chr15 | 13798539 | 13798855 |
| chr15 | 13798855 | 13799219 |
| chr15 | 13969173 | 13969367 |
| chr15 | 13979753 | 13979962 |
| chr15 | 13979962 | 13980300 |
| chr15 | 14424230 | 14424437 |
| chr15 | 14429877 | 14430434 |
| chr15 | 14593525 | 14593887 |
| chr15 | 14623839 | 14624211 |
| chr15 | 14628670 | 14628838 |
| chr15 | 14629300 | 14629626 |
| chr15 | 14641184 | 14641335 |
| chr15 | 14641406 | 14641748 |
| chr15 | 14642366 | 14642532 |
| chr15 | 14645195 | 14645455 |
| chr15 | 14645455 | 14645647 |
| chr15 | 14798457 | 14798655 |
| chr15 | 14799201 | 14799351 |
| chr15 | 14857315 | 14857907 |
| chr15 | 15089941 | 15090091 |
| chr15 | 15240507 | 15240749 |
| chr15 | 15284375 | 15284549 |
| chr15 | 15284693 | 15285027 |

|       |          |          |
|-------|----------|----------|
| chr15 | 15285027 | 15285310 |
| chr15 | 15285310 | 15285658 |
| chr15 | 15789729 | 15789879 |
| chr15 | 15792187 | 15792418 |
| chr15 | 15839661 | 15839824 |
| chr15 | 15873598 | 15873835 |
| chr15 | 16047114 | 16047609 |
| chr15 | 16151540 | 16151761 |
| chr15 | 16180804 | 16181011 |
| chr15 | 16279776 | 16279926 |
| chr15 | 16313888 | 16314158 |
| chr15 | 16404016 | 16404653 |
| chr15 | 16437282 | 16437655 |
| chr15 | 16566243 | 16566466 |
| chr15 | 16566466 | 16566743 |
| chr15 | 16616852 | 16617072 |
| chr15 | 16702393 | 16702573 |
| chr15 | 16956026 | 16956177 |
| chr15 | 17099054 | 17099230 |
| chr15 | 17576231 | 17576485 |
| chr15 | 17576794 | 17576944 |
| chr15 | 17598414 | 17598703 |
| chr15 | 17665642 | 17665884 |
| chr15 | 17667632 | 17667795 |
| chr15 | 17801484 | 17801686 |
| chr15 | 17836960 | 17837225 |
| chr15 | 18064007 | 18064567 |
| chr15 | 18087954 | 18088302 |
| chr15 | 18818585 | 18818738 |
| chr15 | 18820715 | 18820982 |
| chr15 | 18821426 | 18821702 |
| chr15 | 18832392 | 18832554 |
| chr15 | 18994387 | 18994537 |
| chr15 | 19126222 | 19126491 |
| chr15 | 19391342 | 19391530 |
| chr15 | 19391994 | 19392201 |
| chr15 | 19622375 | 19622592 |
| chr15 | 20323627 | 20323898 |
| chr15 | 20436393 | 20436663 |
| chr15 | 20643095 | 20643374 |
| chr15 | 20853923 | 20854191 |
| chr15 | 20957500 | 20957660 |

|       |          |          |
|-------|----------|----------|
| chr15 | 20957920 | 20958303 |
| chr15 | 20958329 | 20958639 |
| chr15 | 20976810 | 20977000 |
| chr15 | 21126797 | 21126972 |
| chr15 | 22256737 | 22256917 |
| chr15 | 22258579 | 22258810 |
| chr15 | 22339048 | 22339230 |
| chr15 | 22433148 | 22433302 |
| chr15 | 22542140 | 22542319 |
| chr15 | 22561641 | 22561816 |
| chr15 | 22564963 | 22565208 |
| chr15 | 22565346 | 22565532 |
| chr15 | 22603802 | 22604032 |
| chr15 | 22628735 | 22629010 |
| chr15 | 22666502 | 22666655 |
| chr15 | 22683759 | 22683939 |
| chr15 | 22711703 | 22711876 |
| chr15 | 22713600 | 22713893 |
| chr15 | 22726536 | 22726704 |
| chr15 | 22733035 | 22733489 |
| chr15 | 22736165 | 22736486 |
| chr15 | 22739439 | 22739778 |
| chr15 | 22752581 | 22752838 |
| chr15 | 22799616 | 22799798 |
| chr15 | 22799798 | 22800001 |
| chr15 | 22800001 | 22800250 |
| chr15 | 22800250 | 22800512 |
| chr15 | 22800512 | 22800971 |
| chr15 | 22903302 | 22903549 |
| chr15 | 22916211 | 22916485 |
| chr15 | 22974165 | 22974427 |
| chr15 | 23035815 | 23036008 |
| chr15 | 23036008 | 23036204 |
| chr15 | 23036251 | 23036561 |
| chr15 | 23036748 | 23036912 |
| chr15 | 23105004 | 23105469 |
| chr15 | 23231389 | 23231618 |
| chr15 | 23317507 | 23317709 |
| chr15 | 23366397 | 23366728 |
| chr15 | 23366801 | 23367100 |
| chr15 | 23402765 | 23403029 |
| chr15 | 23428590 | 23428913 |



|       |          |          |
|-------|----------|----------|
| chr15 | 23429958 | 23430420 |
| chr15 | 23430543 | 23430698 |
| chr15 | 23437176 | 23437437 |
| chr15 | 23452023 | 23452693 |
| chr15 | 23486375 | 23486607 |
| chr15 | 23562929 | 23563164 |
| chr15 | 23565038 | 23565474 |
| chr15 | 23566216 | 23566408 |
| chr15 | 23580480 | 23580833 |
| chr15 | 23581818 | 23582315 |
| chr15 | 23582931 | 23583081 |
| chr15 | 23590593 | 23590821 |
| chr15 | 23636086 | 23636284 |
| chr15 | 23637946 | 23638344 |
| chr15 | 23682196 | 23682703 |
| chr15 | 23717103 | 23717269 |
| chr15 | 23738033 | 23738254 |
| chr15 | 23738580 | 23738742 |
| chr15 | 23798287 | 23798516 |
| chr15 | 23807650 | 23807805 |
| chr15 | 23904096 | 23904595 |
| chr15 | 24158026 | 24158279 |
| chr15 | 24161963 | 24162295 |
| chr15 | 24280635 | 24280790 |
| chr15 | 24281575 | 24281890 |
| chr15 | 24294006 | 24294163 |
| chr15 | 24302684 | 24302861 |
| chr15 | 24302861 | 24303061 |
| chr15 | 24303153 | 24303669 |
| chr15 | 24419899 | 24420070 |
| chr15 | 24456243 | 24456512 |
| chr15 | 24589012 | 24589220 |
| chr15 | 24596311 | 24596549 |
| chr15 | 24597193 | 24597413 |
| chr15 | 24599694 | 24599865 |
| chr15 | 24649707 | 24649914 |
| chr15 | 24724770 | 24724961 |
| chr15 | 25047925 | 25048176 |
| chr15 | 25118057 | 25118277 |
| chr15 | 25135898 | 25136212 |
| chr15 | 25143703 | 25143938 |
| chr15 | 25144289 | 25144608 |

|       |          |          |
|-------|----------|----------|
| chr15 | 25146358 | 25146777 |
| chr15 | 25146824 | 25146986 |
| chr15 | 25188227 | 25188378 |
| chr15 | 25217450 | 25217695 |
| chr15 | 25217928 | 25218272 |
| chr15 | 25265475 | 25265718 |
| chr15 | 25267186 | 25267349 |
| chr15 | 25268490 | 25268789 |
| chr15 | 25269167 | 25269483 |
| chr15 | 25269483 | 25269771 |
| chr15 | 25269771 | 25270095 |
| chr15 | 25271818 | 25272261 |
| chr15 | 25272261 | 25272532 |
| chr15 | 25272532 | 25272764 |
| chr15 | 25301996 | 25302153 |
| chr15 | 25302691 | 25302985 |
| chr15 | 25302985 | 25303318 |
| chr15 | 25322314 | 25322601 |
| chr15 | 25322601 | 25322928 |
| chr15 | 25322928 | 25323189 |
| chr15 | 25323214 | 25323457 |
| chr15 | 25343229 | 25343617 |
| chr15 | 25348379 | 25348667 |
| chr15 | 25348667 | 25349036 |
| chr15 | 25352727 | 25353144 |
| chr15 | 25354874 | 25355043 |
| chr15 | 25365466 | 25365884 |
| chr15 | 25365884 | 25366329 |
| chr15 | 25369404 | 25369948 |
| chr15 | 25370515 | 25370680 |
| chr15 | 25373585 | 25373752 |
| chr15 | 25376799 | 25377299 |
| chr15 | 25377594 | 25377774 |
| chr15 | 25384941 | 25385417 |
| chr15 | 25387631 | 25387996 |
| chr15 | 25392410 | 25392562 |
| chr15 | 25396039 | 25396304 |
| chr15 | 25396304 | 25396683 |
| chr15 | 25397340 | 25397591 |
| chr15 | 25398777 | 25399082 |
| chr15 | 25400215 | 25400488 |
| chr15 | 25402006 | 25402232 |

|       |          |          |
|-------|----------|----------|
| chr15 | 25407050 | 25407233 |
| chr15 | 25407233 | 25407431 |
| chr15 | 25412136 | 25412399 |
| chr15 | 25412399 | 25412695 |
| chr15 | 25412695 | 25412975 |
| chr15 | 25412975 | 25413293 |
| chr15 | 25413293 | 25413630 |
| chr15 | 25413630 | 25413901 |
| chr15 | 25413901 | 25414141 |
| chr15 | 25414157 | 25414377 |
| chr15 | 25414377 | 25414580 |
| chr15 | 25414580 | 25414834 |
| chr15 | 25414836 | 25415063 |
| chr15 | 25420198 | 25420667 |
| chr15 | 25420667 | 25421015 |
| chr15 | 25428560 | 25428985 |
| chr15 | 25428985 | 25429407 |
| chr15 | 25432253 | 25432595 |
| chr15 | 25435900 | 25436316 |
| chr15 | 25436316 | 25436577 |
| chr15 | 25436577 | 25436837 |
| chr15 | 25436837 | 25437281 |
| chr15 | 25441068 | 25441218 |
| chr15 | 25444124 | 25444616 |
| chr15 | 25449033 | 25449298 |
| chr15 | 25449393 | 25449701 |
| chr15 | 25449701 | 25449968 |
| chr15 | 25457512 | 25457785 |
| chr15 | 25484901 | 25485056 |
| chr15 | 25490889 | 25491509 |
| chr15 | 25494686 | 25495122 |
| chr15 | 25504956 | 25505518 |
| chr15 | 25518037 | 25518511 |
| chr15 | 25518988 | 25519169 |
| chr15 | 25521350 | 25521505 |
| chr15 | 25543895 | 25544187 |
| chr15 | 25545743 | 25545924 |
| chr15 | 25546048 | 25546319 |
| chr15 | 25546319 | 25546698 |
| chr15 | 25551824 | 25552022 |
| chr15 | 25555871 | 25556166 |
| chr15 | 25556532 | 25556893 |

|       |          |          |
|-------|----------|----------|
| chr15 | 25559791 | 25560082 |
| chr15 | 25560954 | 25561168 |
| chr15 | 25561170 | 25561629 |
| chr15 | 25563431 | 25563698 |
| chr15 | 25563698 | 25564127 |
| chr15 | 25573923 | 25574227 |
| chr15 | 25574227 | 25574548 |
| chr15 | 25577393 | 25577684 |
| chr15 | 25577684 | 25578034 |
| chr15 | 25582143 | 25582365 |
| chr15 | 25589407 | 25589584 |
| chr15 | 25592049 | 25592329 |
| chr15 | 25598236 | 25598715 |
| chr15 | 25602217 | 25602545 |
| chr15 | 25606061 | 25606278 |
| chr15 | 25614677 | 25614872 |
| chr15 | 25621937 | 25622150 |
| chr15 | 25622150 | 25622428 |
| chr15 | 25622428 | 25622877 |
| chr15 | 25622877 | 25623474 |
| chr15 | 25624364 | 25624568 |
| chr15 | 25635813 | 25636039 |
| chr15 | 25637628 | 25638183 |
| chr15 | 25638324 | 25638494 |
| chr15 | 25639229 | 25639618 |
| chr15 | 25642421 | 25642616 |
| chr15 | 25645658 | 25645838 |
| chr15 | 25646442 | 25646602 |
| chr15 | 25647034 | 25647727 |
| chr15 | 25650501 | 25650675 |
| chr15 | 25652629 | 25653004 |
| chr15 | 25653004 | 25653316 |
| chr15 | 25653316 | 25653560 |
| chr15 | 25665775 | 25665956 |
| chr15 | 25667673 | 25667897 |
| chr15 | 25668148 | 25668355 |
| chr15 | 25670010 | 25670231 |
| chr15 | 25674658 | 25674824 |
| chr15 | 25675369 | 25675539 |
| chr15 | 25678268 | 25678426 |
| chr15 | 25680270 | 25680502 |
| chr15 | 25688491 | 25688657 |

|       |          |          |
|-------|----------|----------|
| chr15 | 25698990 | 25699264 |
| chr15 | 25699278 | 25699428 |
| chr15 | 25707240 | 25707454 |
| chr15 | 25715320 | 25715520 |
| chr15 | 25715663 | 25715872 |
| chr15 | 25716865 | 25717061 |
| chr15 | 25717099 | 25717334 |
| chr15 | 25717682 | 25717859 |
| chr15 | 25722768 | 25722983 |
| chr15 | 25726867 | 25727177 |
| chr15 | 25728557 | 25728812 |
| chr15 | 25730691 | 25730871 |
| chr15 | 25732850 | 25733072 |
| chr15 | 25733993 | 25734170 |
| chr15 | 25742102 | 25742409 |
| chr15 | 25743692 | 25743947 |
| chr15 | 25746257 | 25746522 |
| chr15 | 25758339 | 25759203 |
| chr15 | 25760403 | 25760587 |
| chr15 | 25767697 | 25768507 |
| chr15 | 25768750 | 25769054 |
| chr15 | 25769054 | 25769350 |
| chr15 | 25774230 | 25774402 |
| chr15 | 25778862 | 25779342 |
| chr15 | 25792001 | 25792325 |
| chr15 | 25794555 | 25794848 |
| chr15 | 25796425 | 25796713 |
| chr15 | 25802326 | 25802656 |
| chr15 | 25805290 | 25805552 |
| chr15 | 25805695 | 25805850 |
| chr15 | 25805887 | 25806115 |
| chr15 | 25809067 | 25809409 |
| chr15 | 25811886 | 25812036 |
| chr15 | 25815837 | 25816050 |
| chr15 | 25816930 | 25817209 |
| chr15 | 25817351 | 25817528 |
| chr15 | 25820885 | 25821048 |
| chr15 | 25824430 | 25824810 |
| chr15 | 25826464 | 25826767 |
| chr15 | 25828365 | 25828678 |
| chr15 | 25834337 | 25834535 |
| chr15 | 25842578 | 25842856 |

|       |          |          |
|-------|----------|----------|
| chr15 | 25842957 | 25843461 |
| chr15 | 25843461 | 25843963 |
| chr15 | 25847784 | 25848051 |
| chr15 | 25856122 | 25856335 |
| chr15 | 25856839 | 25857030 |
| chr15 | 25858118 | 25858276 |
| chr15 | 25858608 | 25859091 |
| chr15 | 25859373 | 25859784 |
| chr15 | 25863261 | 25863607 |
| chr15 | 25865251 | 25865519 |
| chr15 | 25865610 | 25865921 |
| chr15 | 25866168 | 25866642 |
| chr15 | 25872781 | 25872982 |
| chr15 | 25876520 | 25877207 |
| chr15 | 25879160 | 25879560 |
| chr15 | 25883302 | 25883515 |
| chr15 | 25883674 | 25883846 |
| chr15 | 25900398 | 25900915 |
| chr15 | 25907076 | 25907253 |
| chr15 | 25913018 | 25913271 |
| chr15 | 25915001 | 25915428 |
| chr15 | 25915428 | 25915906 |
| chr15 | 25915908 | 25916103 |
| chr15 | 25916190 | 25916662 |
| chr15 | 25928093 | 25928313 |
| chr15 | 25932501 | 25932766 |
| chr15 | 25932925 | 25933153 |
| chr15 | 25933153 | 25933392 |
| chr15 | 25933392 | 25933720 |
| chr15 | 25933720 | 25934048 |
| chr15 | 25940303 | 25940577 |
| chr15 | 25940577 | 25940772 |
| chr15 | 25940772 | 25940993 |
| chr15 | 25940993 | 25941210 |
| chr15 | 25948684 | 25948907 |
| chr15 | 25948907 | 25949225 |
| chr15 | 25950635 | 25950976 |
| chr15 | 25950976 | 25951272 |
| chr15 | 25956304 | 25956842 |
| chr15 | 25956842 | 25957377 |
| chr15 | 25958849 | 25959011 |
| chr15 | 25959472 | 25959643 |

|       |          |          |
|-------|----------|----------|
| chr15 | 25966170 | 25966479 |
| chr15 | 25966479 | 25966845 |
| chr15 | 25983725 | 25983899 |
| chr15 | 25983964 | 25984442 |
| chr15 | 25984442 | 25985091 |
| chr15 | 25991404 | 25991557 |
| chr15 | 25992510 | 25992674 |
| chr15 | 25993394 | 25993663 |
| chr15 | 25995610 | 25995823 |
| chr15 | 25999615 | 25999767 |
| chr15 | 26005371 | 26005545 |
| chr15 | 26021201 | 26021387 |
| chr15 | 26041373 | 26041535 |
| chr15 | 26051358 | 26051838 |
| chr15 | 26070151 | 26070345 |
| chr15 | 26081382 | 26081534 |
| chr15 | 26223332 | 26223612 |
| chr15 | 26309388 | 26309543 |
| chr15 | 26309543 | 26309729 |
| chr15 | 26309729 | 26309971 |
| chr15 | 26353690 | 26353965 |
| chr15 | 26355558 | 26355952 |
| chr15 | 26359939 | 26360108 |
| chr15 | 26364287 | 26364580 |
| chr15 | 26366619 | 26366904 |
| chr15 | 26374298 | 26374651 |
| chr15 | 26374748 | 26374965 |
| chr15 | 26374965 | 26375398 |
| chr15 | 26378916 | 26379196 |
| chr15 | 26410992 | 26411208 |
| chr15 | 26412021 | 26412298 |
| chr15 | 26418458 | 26418644 |
| chr15 | 26432594 | 26433030 |
| chr15 | 26437199 | 26437498 |
| chr15 | 26469932 | 26470196 |
| chr15 | 26894976 | 26895171 |
| chr15 | 26895255 | 26895775 |
| chr15 | 26917805 | 26918022 |
| chr15 | 26918321 | 26918524 |
| chr15 | 26918524 | 26918793 |
| chr15 | 27234839 | 27235123 |
| chr15 | 27304322 | 27304594 |

|       |          |          |
|-------|----------|----------|
| chr15 | 27316066 | 27316270 |
| chr15 | 27325889 | 27326185 |
| chr15 | 27356853 | 27357017 |
| chr15 | 27381568 | 27381915 |
| chr15 | 27405631 | 27406121 |
| chr15 | 27418560 | 27418906 |
| chr15 | 27418906 | 27419200 |
| chr15 | 27466091 | 27466710 |
| chr15 | 27466710 | 27467010 |
| chr15 | 27467010 | 27467243 |
| chr15 | 27477587 | 27478009 |
| chr15 | 27481979 | 27482253 |
| chr15 | 27492162 | 27492514 |
| chr15 | 27506147 | 27506511 |
| chr15 | 27506511 | 27507076 |
| chr15 | 27513621 | 27513899 |
| chr15 | 27517130 | 27517365 |
| chr15 | 27518033 | 27518409 |
| chr15 | 27518539 | 27518763 |
| chr15 | 27528081 | 27528405 |
| chr15 | 27529631 | 27529901 |
| chr15 | 27529922 | 27530374 |
| chr15 | 27560924 | 27561165 |
| chr15 | 27561331 | 27561488 |
| chr15 | 27563562 | 27563834 |
| chr15 | 27570063 | 27570224 |
| chr15 | 27575950 | 27576320 |
| chr15 | 27576942 | 27577273 |
| chr15 | 27579989 | 27580165 |
| chr15 | 27583169 | 27583389 |
| chr15 | 27590823 | 27590976 |
| chr15 | 27595531 | 27595825 |
| chr15 | 27596514 | 27596748 |
| chr15 | 27596801 | 27597290 |
| chr15 | 27612658 | 27613217 |
| chr15 | 27613371 | 27613708 |
| chr15 | 27614473 | 27614647 |
| chr15 | 27617376 | 27617537 |
| chr15 | 27630016 | 27630394 |
| chr15 | 27630394 | 27630772 |
| chr15 | 27630772 | 27631038 |
| chr15 | 27631038 | 27631309 |



|       |          |          |
|-------|----------|----------|
| chr15 | 27642979 | 27643216 |
| chr15 | 27655089 | 27655290 |
| chr15 | 27657907 | 27658222 |
| chr15 | 27659612 | 27659915 |
| chr15 | 27662923 | 27663156 |
| chr15 | 27672703 | 27673035 |
| chr15 | 27681077 | 27682033 |
| chr15 | 27691192 | 27691342 |
| chr15 | 27691342 | 27691494 |
| chr15 | 27695828 | 27696174 |
| chr15 | 27696174 | 27696487 |
| chr15 | 27702055 | 27702257 |
| chr15 | 27705143 | 27705470 |
| chr15 | 27714407 | 27714600 |
| chr15 | 27715426 | 27715671 |
| chr15 | 27720346 | 27720507 |
| chr15 | 27723854 | 27724080 |
| chr15 | 27740278 | 27740437 |
| chr15 | 27741522 | 27741708 |
| chr15 | 27741708 | 27741904 |
| chr15 | 27741904 | 27742146 |
| chr15 | 27742146 | 27742428 |
| chr15 | 27747680 | 27747907 |
| chr15 | 27752020 | 27752423 |
| chr15 | 27754973 | 27755135 |
| chr15 | 27759731 | 27759926 |
| chr15 | 27767690 | 27767878 |
| chr15 | 27772862 | 27773022 |
| chr15 | 27780065 | 27780298 |
| chr15 | 27782720 | 27782998 |
| chr15 | 27783149 | 27783367 |
| chr15 | 27783520 | 27783707 |
| chr15 | 27783707 | 27783934 |
| chr15 | 27783968 | 27784231 |
| chr15 | 27784231 | 27784697 |
| chr15 | 27785349 | 27785651 |
| chr15 | 27785651 | 27785973 |
| chr15 | 27792269 | 27792421 |
| chr15 | 27792581 | 27792740 |
| chr15 | 27794711 | 27795020 |
| chr15 | 27798250 | 27798438 |
| chr15 | 27798733 | 27799007 |

|       |          |          |
|-------|----------|----------|
| chr15 | 27801213 | 27801430 |
| chr15 | 27802230 | 27802628 |
| chr15 | 27806308 | 27806702 |
| chr15 | 27815667 | 27815866 |
| chr15 | 27815866 | 27816152 |
| chr15 | 27816152 | 27816456 |
| chr15 | 27816456 | 27816744 |
| chr15 | 27821701 | 27822203 |
| chr15 | 27823256 | 27823642 |
| chr15 | 27823642 | 27823911 |
| chr15 | 27825414 | 27825730 |
| chr15 | 27826154 | 27826304 |
| chr15 | 27842963 | 27843239 |
| chr15 | 27849552 | 27850269 |
| chr15 | 27850269 | 27850554 |
| chr15 | 27859739 | 27859896 |
| chr15 | 27860425 | 27860844 |
| chr15 | 27865854 | 27866178 |
| chr15 | 27867694 | 27867946 |
| chr15 | 27871871 | 27872013 |
| chr15 | 27872013 | 27872165 |
| chr15 | 27872271 | 27872618 |
| chr15 | 27877432 | 27877601 |
| chr15 | 27884413 | 27884667 |
| chr15 | 27884667 | 27884904 |
| chr15 | 27884904 | 27885152 |
| chr15 | 27885742 | 27885904 |
| chr15 | 27892209 | 27892728 |
| chr15 | 27898934 | 27899403 |
| chr15 | 27899403 | 27899752 |
| chr15 | 27905314 | 27905671 |
| chr15 | 27905867 | 27906065 |
| chr15 | 27907823 | 27908020 |
| chr15 | 27908421 | 27908667 |
| chr15 | 27914236 | 27914797 |
| chr15 | 27919680 | 27919874 |
| chr15 | 27923649 | 27923990 |
| chr15 | 27923990 | 27924356 |
| chr15 | 27931140 | 27931340 |
| chr15 | 27936958 | 27937600 |
| chr15 | 27937614 | 27937901 |
| chr15 | 27942122 | 27942554 |

|       |          |          |
|-------|----------|----------|
| chr15 | 27943476 | 27943770 |
| chr15 | 27943770 | 27944147 |
| chr15 | 27954164 | 27954643 |
| chr15 | 27954643 | 27954992 |
| chr15 | 27964886 | 27965166 |
| chr15 | 27969334 | 27969716 |
| chr15 | 27972390 | 27972549 |
| chr15 | 27972585 | 27972781 |
| chr15 | 27976331 | 27976654 |
| chr15 | 27977157 | 27977356 |
| chr15 | 27991984 | 27992198 |
| chr15 | 27992198 | 27992471 |
| chr15 | 27997327 | 27997947 |
| chr15 | 27997987 | 27998198 |
| chr15 | 27998811 | 27999024 |
| chr15 | 28004276 | 28004703 |
| chr15 | 28004711 | 28004929 |
| chr15 | 28007409 | 28007882 |
| chr15 | 28008304 | 28008523 |
| chr15 | 28009722 | 28009967 |
| chr15 | 28011330 | 28011508 |
| chr15 | 28012251 | 28012443 |
| chr15 | 28012535 | 28012687 |
| chr15 | 28019438 | 28019736 |
| chr15 | 28024222 | 28024675 |
| chr15 | 28024675 | 28024912 |
| chr15 | 28024912 | 28025149 |
| chr15 | 28025149 | 28025408 |
| chr15 | 28025512 | 28025898 |
| chr15 | 28025898 | 28026475 |
| chr15 | 28051868 | 28052111 |
| chr15 | 28057920 | 28058070 |
| chr15 | 28063573 | 28063839 |
| chr15 | 28067466 | 28067691 |
| chr15 | 28070818 | 28071149 |
| chr15 | 28081017 | 28081602 |
| chr15 | 28092792 | 28092959 |
| chr15 | 28099644 | 28099984 |
| chr15 | 28100414 | 28100566 |
| chr15 | 28128927 | 28129157 |
| chr15 | 28132194 | 28132628 |
| chr15 | 28132854 | 28133082 |

|       |          |          |
|-------|----------|----------|
| chr15 | 28133125 | 28133801 |
| chr15 | 28140732 | 28140974 |
| chr15 | 28141368 | 28141807 |
| chr15 | 28153382 | 28153653 |
| chr15 | 28158587 | 28158962 |
| chr15 | 28158962 | 28159240 |
| chr15 | 28159240 | 28159544 |
| chr15 | 28162557 | 28162818 |
| chr15 | 28178932 | 28179299 |
| chr15 | 28179546 | 28179829 |
| chr15 | 28179829 | 28180180 |
| chr15 | 28181420 | 28181739 |
| chr15 | 28181832 | 28182307 |
| chr15 | 28188100 | 28188342 |
| chr15 | 28189687 | 28189979 |
| chr15 | 28209982 | 28210134 |
| chr15 | 28248022 | 28248310 |
| chr15 | 28299509 | 28299710 |
| chr15 | 28315919 | 28316090 |
| chr15 | 28316130 | 28316408 |
| chr15 | 28393714 | 28394045 |
| chr15 | 28397590 | 28397888 |
| chr15 | 28402651 | 28402899 |
| chr15 | 28403361 | 28403511 |
| chr15 | 28618423 | 28618889 |
| chr15 | 28623186 | 28623381 |
| chr15 | 28626810 | 28626979 |
| chr15 | 28628185 | 28628552 |
| chr15 | 28628552 | 28628752 |
| chr15 | 28629650 | 28629803 |
| chr15 | 28979410 | 28979599 |
| chr15 | 28980029 | 28980329 |
| chr15 | 29041903 | 29042086 |
| chr15 | 29234775 | 29234932 |
| chr15 | 29292677 | 29293096 |
| chr15 | 29568532 | 29568712 |
| chr15 | 29669525 | 29669826 |
| chr15 | 29686728 | 29687033 |
| chr15 | 29687033 | 29687286 |
| chr15 | 29687286 | 29687760 |
| chr15 | 29693983 | 29694156 |
| chr15 | 29703742 | 29704072 |

|       |          |          |
|-------|----------|----------|
| chr15 | 29714685 | 29714880 |
| chr15 | 29714880 | 29715134 |
| chr15 | 29728339 | 29728619 |
| chr15 | 29769173 | 29769504 |
| chr15 | 29781722 | 29781902 |
| chr15 | 29783837 | 29784002 |
| chr15 | 29836815 | 29836990 |
| chr15 | 29862046 | 29862252 |
| chr15 | 29881958 | 29882482 |
| chr15 | 29886019 | 29886280 |
| chr15 | 29911017 | 29911284 |
| chr15 | 29911486 | 29911766 |
| chr15 | 29911903 | 29912344 |
| chr15 | 29913289 | 29913470 |
| chr15 | 29932707 | 29933384 |
| chr15 | 29977090 | 29977391 |
| chr15 | 29977413 | 29977625 |
| chr15 | 29980411 | 29980672 |
| chr15 | 29983025 | 29983216 |
| chr15 | 30029349 | 30029554 |
| chr15 | 30150594 | 30150803 |
| chr15 | 30150803 | 30151026 |
| chr15 | 30172328 | 30172796 |
| chr15 | 30172796 | 30173028 |
| chr15 | 30173028 | 30173290 |
| chr15 | 30173290 | 30173563 |
| chr15 | 30276653 | 30277106 |
| chr15 | 30399773 | 30400178 |
| chr15 | 30400628 | 30401248 |
| chr15 | 30427428 | 30427694 |
| chr15 | 30467252 | 30467495 |
| chr15 | 30467826 | 30468049 |
| chr15 | 30468787 | 30469092 |
| chr15 | 30625081 | 30625232 |
| chr15 | 30628555 | 30628883 |
| chr15 | 30628883 | 30629116 |
| chr15 | 30630744 | 30630894 |
| chr15 | 30640438 | 30641149 |
| chr15 | 30646469 | 30646934 |
| chr15 | 30646934 | 30647171 |
| chr15 | 30647171 | 30647586 |
| chr15 | 30648692 | 30648947 |

|       |          |          |
|-------|----------|----------|
| chr15 | 30649990 | 30650297 |
| chr15 | 30654542 | 30654874 |
| chr15 | 30686780 | 30686969 |
| chr15 | 30690884 | 30691113 |
| chr15 | 30740825 | 30741061 |
| chr15 | 30785761 | 30785949 |
| chr15 | 30786039 | 30786226 |
| chr15 | 30885432 | 30885812 |
| chr15 | 30886147 | 30886362 |
| chr15 | 30909758 | 30909926 |
| chr15 | 31047672 | 31047871 |
| chr15 | 31052170 | 31052325 |
| chr15 | 31068149 | 31068445 |
| chr15 | 31070294 | 31070711 |
| chr15 | 31070840 | 31071076 |
| chr15 | 31091774 | 31092204 |
| chr15 | 31092204 | 31092542 |
| chr15 | 31105327 | 31105517 |
| chr15 | 31113211 | 31113591 |
| chr15 | 31117440 | 31117715 |
| chr15 | 31137381 | 31137597 |
| chr15 | 31150564 | 31150842 |
| chr15 | 31150879 | 31151110 |
| chr15 | 31175645 | 31176075 |
| chr15 | 31176075 | 31176386 |
| chr15 | 31176386 | 31176759 |
| chr15 | 31184550 | 31184870 |
| chr15 | 31184870 | 31185123 |
| chr15 | 31185123 | 31185317 |
| chr15 | 31186400 | 31186601 |
| chr15 | 31187363 | 31187856 |
| chr15 | 31188836 | 31189131 |
| chr15 | 31197016 | 31197168 |
| chr15 | 31197181 | 31197586 |
| chr15 | 31217710 | 31217944 |
| chr15 | 31224091 | 31224451 |
| chr15 | 31224451 | 31224789 |
| chr15 | 31225032 | 31225262 |
| chr15 | 31225262 | 31225493 |
| chr15 | 31227929 | 31228079 |
| chr15 | 31229710 | 31229976 |
| chr15 | 31229976 | 31230275 |

|       |          |          |
|-------|----------|----------|
| chr15 | 31235186 | 31235731 |
| chr15 | 31235731 | 31236235 |
| chr15 | 31245943 | 31246408 |
| chr15 | 31254128 | 31254345 |
| chr15 | 31258770 | 31258931 |
| chr15 | 31261170 | 31261473 |
| chr15 | 31264827 | 31265213 |
| chr15 | 31279148 | 31279350 |
| chr15 | 31279609 | 31279990 |
| chr15 | 31292503 | 31292981 |
| chr15 | 31297263 | 31297441 |
| chr15 | 31297571 | 31297802 |
| chr15 | 31297802 | 31298018 |
| chr15 | 31298018 | 31298304 |
| chr15 | 31302298 | 31302849 |
| chr15 | 31309661 | 31309822 |
| chr15 | 31311704 | 31312044 |
| chr15 | 31312044 | 31312337 |
| chr15 | 31315690 | 31315988 |
| chr15 | 31317254 | 31317590 |
| chr15 | 31325302 | 31325452 |
| chr15 | 31331781 | 31332022 |
| chr15 | 31332531 | 31332851 |
| chr15 | 31336655 | 31337117 |
| chr15 | 31337240 | 31337424 |
| chr15 | 31338633 | 31339033 |
| chr15 | 31342013 | 31342542 |
| chr15 | 31342542 | 31342963 |
| chr15 | 31349718 | 31350021 |
| chr15 | 31350021 | 31350308 |
| chr15 | 31352906 | 31353196 |
| chr15 | 31356724 | 31357273 |
| chr15 | 31366381 | 31366568 |
| chr15 | 31366648 | 31366906 |
| chr15 | 31366906 | 31367192 |
| chr15 | 31367192 | 31367473 |
| chr15 | 31367473 | 31367812 |
| chr15 | 31367812 | 31368091 |
| chr15 | 31374699 | 31374915 |
| chr15 | 31375222 | 31375546 |
| chr15 | 31382287 | 31382486 |
| chr15 | 31392164 | 31392500 |

|       |          |          |
|-------|----------|----------|
| chr15 | 31401044 | 31401289 |
| chr15 | 31410761 | 31410916 |
| chr15 | 31418197 | 31418398 |
| chr15 | 31424522 | 31424708 |
| chr15 | 31434607 | 31434772 |
| chr15 | 31435895 | 31436057 |
| chr15 | 31447125 | 31447320 |
| chr15 | 31447320 | 31447524 |
| chr15 | 31453270 | 31453982 |
| chr15 | 31472906 | 31473517 |
| chr15 | 31517331 | 31517504 |
| chr15 | 31530063 | 31530258 |
| chr15 | 31530309 | 31530623 |
| chr15 | 31530623 | 31530993 |
| chr15 | 31530993 | 31531539 |
| chr15 | 31535991 | 31536435 |
| chr15 | 31542225 | 31542500 |
| chr15 | 31542500 | 31542689 |
| chr15 | 31542689 | 31542913 |
| chr15 | 31546363 | 31546624 |
| chr15 | 31558329 | 31558568 |
| chr15 | 31561314 | 31561809 |
| chr15 | 31568737 | 31568984 |
| chr15 | 31569366 | 31569567 |
| chr15 | 31570400 | 31570586 |
| chr15 | 31578951 | 31579103 |
| chr15 | 31579382 | 31579561 |
| chr15 | 31583804 | 31583990 |
| chr15 | 31586550 | 31586874 |
| chr15 | 31587731 | 31587916 |
| chr15 | 31587918 | 31588093 |
| chr15 | 31589009 | 31589270 |
| chr15 | 31590520 | 31590670 |
| chr15 | 31599919 | 31600198 |
| chr15 | 31601250 | 31601649 |
| chr15 | 31601649 | 31601969 |
| chr15 | 31602051 | 31602419 |
| chr15 | 31602490 | 31602728 |
| chr15 | 31606885 | 31607133 |
| chr15 | 31632418 | 31632837 |
| chr15 | 31652004 | 31652393 |
| chr15 | 31652393 | 31652823 |



|       |          |          |
|-------|----------|----------|
| chr15 | 31673160 | 31673335 |
| chr15 | 31724337 | 31724595 |
| chr15 | 32096083 | 32096233 |
| chr15 | 32141611 | 32141761 |
| chr15 | 32150202 | 32150481 |
| chr15 | 32195957 | 32196145 |
| chr15 | 32232698 | 32233109 |
| chr15 | 32241586 | 32241987 |
| chr15 | 32244325 | 32244634 |
| chr15 | 32244634 | 32244950 |
| chr15 | 32244958 | 32245291 |
| chr15 | 32245291 | 32245701 |
| chr15 | 32245701 | 32246012 |
| chr15 | 32246047 | 32246289 |
| chr15 | 32305363 | 32305628 |
| chr15 | 32322522 | 32322850 |
| chr15 | 32322850 | 32323204 |
| chr15 | 32323204 | 32323519 |
| chr15 | 32328735 | 32328924 |



|                                                                       |                    |          |           |        |      |        |         |        |
|-----------------------------------------------------------------------|--------------------|----------|-----------|--------|------|--------|---------|--------|
| OCTOC1-short[POU]HomeoboxNCP-CTC6-ChIP-Seq(GSE43916)Hom               | ATGCAATWGCATRW     | 1.00E-05 | -1.31E+01 | 0      | 382  | 14.56% | 22994.3 | 11.56% |
| ZNF633[KF52-ZNF633-ChIP-Seq(GSE27771)Hom                              | CTGTCGGTGCG        | 1.00E-05 | -1.28E+01 | 0      | 713  | 27.17% | 48374.3 | 23.32% |
| AP-2gamma[AP2]MZF2-1-TPAC-ChIP-Seq(GSE1234)Hom                        | SCCTAATGGSCAW      | 1.00E-05 | -1.26E+01 | 0      | 406  | 15.47% | 24373.6 | 12.42% |
| KLF5[Zf]KLF5-KLF5-ChIP-Seq(GSE49402)Hom                               | DGGGVTGGGG         | 1.00E-05 | -1.26E+01 | 0      | 678  | 25.84% | 43296.5 | 22.06% |
| AP-2alpha[AP2]HesA-AP2alpha-ChIP-Seq(GSE31477)Hom                     | ATGCCCTGAGGCC      | 1.00E-05 | -1.26E+01 | 0      | 318  | 11.84% | 18342.9 | 9.35%  |
| Son1[TKM]Endomysin1-ChIP-Seq(GSE104319)Hom                            | CCZATGTATYB        | 1.00E-05 | -1.21E+01 | 0      | 403  | 13.4%  | 23443.7 | 10.3%  |
| Unknown[Homeobox]Limb-p300-ChIP-Seq                                   | SSCMATWAA          | 1.00E-05 | -1.25E+01 | 0      | 420  | 10.79% | 18206.6 | 8.26%  |
| Lt1[Zf]HMG12878-Lt1-Zf-ChIP-Seq(GSE32465)Hom                          | VCAGCTGYTG         | 1.00E-05 | -1.23E+01 | 0      | 285  | 16.20% | 25827.9 | 13.16% |
| PRDM12[Zf]HEK293-PRDM12-ChIP-Seq(GSE42606)Hom                         | TGGTGACATCCA       | 1.00E-05 | -1.22E+01 | 0      | 418  | 15.38% | 17263.1 | 8.88%  |
| pe3[pe3]Keratinocyte-pe3-ChIP-Seq(GSE17611)Hom                        | NNDRCATGYNRRCATG   | 1.00E-05 | -1.22E+01 | 0      | 183  | 6.97%  | 9776    | 4.98%  |
| Zfp281[Zf]ES-Zfp281-ChIP-Seq(GSE81042)Hom                             | CCCCCTCCCCAG       | 1.00E-05 | -1.21E+01 | 0      | 130  | 4.95%  | 6474.6  | 3.30%  |
| Nkx3.1[Homeobox]LncAP-Nkx3.1-ChIP-Seq(GSE26264)Hom                    | AAGCACTTAA         | 1.00E-05 | -1.21E+01 | 0      | 1009 | 38.45% | 67370.5 | 34.33% |
| AIN1[TH1]Teles-AIN1-ChIP-Seq(GSE4458)Hom                              | TGGCACTTGG         | 1.00E-05 | -1.21E+01 | 0      | 676  | 25.76% | 34242.3 | 22.13% |
| Pt1x1[Ebox]Homeobox.bHLH1/Hindlimb-Pt1x1-ChIP-Seq(GSE41591)Hom        | YTAATTRAWWCCAGATG  | 1.00E-05 | -1.20E+01 | 0      | 100  | 3.81%  | 4683.3  | 2.39%  |
| HNF1b[Homeobox]Liver-HNF1b-ChIP-Seq(ERP000394)Hom                     | NTATYGATCT         | 1.00E-05 | -1.19E+01 | 0      | 213  | 8.12%  | 11751.2 | 5.9%   |
| Srsf3[Zf]Srsf3-CDN-Srsf3-ChIP-Seq(GSE19189)Hom                        | SYVATCCGGRARB      | 1.00E-05 | -1.17E+01 | 0      | 351  | 13.38% | 23950.4 | 10.58% |
| ZNF711[Zf]SHS9Y-ZNF711-ChIP-Seq(GSE20673)Hom                          | AGGCCTAG           | 1.00E-05 | -1.17E+01 | 0      | 648  | 24.70% | 41561.7 | 21.18% |
| GATA3[Zf]DR1[Trag]Gata3-ChIP-Seq(GSE20886)Hom                         | AGATGKGAGGATAAG    | 1.00E-04 | -1.13E+01 | 0      | 56   | 2.10%  | 2185.3  | 1.11%  |
| FOXP1[Forebrain]FOX-1-ChIP-Seq(GSE11006)Hom                           | NYTTTGTACTH        | 1.00E-04 | -1.12E+01 | 0      | 252  | 9.80%  | 14452.4 | 7.38%  |
| Glis2[Zf]HPC7-GLI2-ChIP-Seq(GSE22173)Hom                              | MAATCACTG          | 1.00E-04 | -1.11E+01 | 0      | 310  | 11.81% | 18328.9 | 9.34%  |
| HIF2a[bHLH]785-O-HIF2a-ChIP-Seq(GSE34871)Hom                          | GCAGCCTAG          | 1.00E-04 | -1.11E+01 | 0      | 141  | 5.37%  | 7301.1  | 3.72%  |
| ZNF322[Zf]HEK293-ZNF322-Zf-ChIP-Seq(GSE38341)Hom                      | GCACCCTGGTACTGGGCC | 1.00E-04 | -1.10E+01 | 0      | 145  | 5.53%  | 7585.2  | 3.86%  |
| Smaad2[MADS]S-SMAO2-ChIP-Seq(GSE29422)Hom                             | C1GTCTGG           | 1.00E-04 | -1.10E+01 | 0      | 691  | 26.53% | 44864.2 | 22.86% |
| Klf6[Zf]PDAC-Klf6-ChIP-Seq(GSE45557)Hom                               | MKGGGCTGGGCC       | 1.00E-04 | -1.10E+01 | 0      | 258  | 20.01% | 33145.6 | 16.89% |
| NF1[CTF]LncAP-NF1-ChIP-Seq(Unpublished)Hom                            | CYTGCCABNSTGCCAR   | 1.00E-04 | -1.10E+01 | 0      | 525  | 18.95% | 14895.1 | 7.59%  |
| Ox21[Homeobox]VLDL-Cox2-ChIP-Seq(GSE5909)Hom                          | NYTAACTCYB         | 1.00E-04 | -1.08E+01 | 0      | 359  | 13.98% | 21599.5 | 11.06% |
| Afz2[Zf]ZP131-Afz2-ChIP-Seq(GSE56872)Hom                              | NRRTAGCCTCAT       | 1.00E-04 | -1.09E+01 | 0      | 290  | 11.05% | 17040   | 8.68%  |
| Foxo3[Forebrain]UZOS-Foxo3-ChIP-Seq(EMTAB-2701)Hom                    | DG3TAAEA           | 1.00E-04 | -1.06E+01 | 0.0001 | 394  | 15.02% | 24193.3 | 12.33% |
| NPAS2[HLH]Liver-NPAS2-ChIP-Seq(GSE39850)Hom                           | KCCAGCTGAC         | 1.00E-04 | -1.05E+01 | 0.0001 | 481  | 18.33% | 30121.2 | 15.40% |
| Mez2[MADS]HEK293-Mez2-V-ChIP-Seq(GSE24592)Hom                         | GCTATTTTCGGM       | 1.00E-04 | -1.04E+01 | 0.0001 | 391  | 14.73% | 24732.4 | 12.32% |
| MyoG[bHLH]C2C12-MyoG-ChIP-Seq(GSE36024)Hom                            | AACAGCTG           | 1.00E-04 | -1.02E+01 | 0.0001 | 452  | 17.23% | 28308.8 | 14.43% |
| EBF1[EBF]Near-E2A-ChIP-Seq(GSE21512)Hom                               | GTCGCCVGGGGGA      | 1.00E-04 | -9.89E+00 | 0.0001 | 414  | 15.78% | 25770.1 | 13.13% |
| Isl1a[Zf]HSC-101.1-ChIP-Seq(GSE21713)Hom                              | YTGCCAGCWRG        | 1.00E-04 | -9.85E+00 | 0.0002 | 380  | 14.48% | 24370.2 | 12.3%  |
| KLF14[Zf]HSC9-KLF14-GFP-ChIP-Seq(GSE58341)Hom                         | RKTGGCCGCGCC       | 1.00E-04 | -9.77E+00 | 0.0001 | 746  | 28.43% | 49214.1 | 25.10% |
| Egr1[Zf]K562-Egr1-ChIP-Seq(GSE32465)Hom                               | TGCTGTGGYG         | 1.00E-04 | -9.59E+00 | 0.0002 | 273  | 10.40% | 16221.6 | 8.27%  |
| GATA2[Zf]H4-Gata2-ChIP-Seq(GSE2113)Hom                                | NAGATTHRNBNACTNN   | 1.00E-04 | -9.54E+00 | 0.0002 | 40   | 1.5%   | 1053.2  | 0.54%  |
| Kat2[Homeobox]Liver-Kat2-ChIP-Seq(GSE35985)Hom                        | HRNRATCAV          | 1.00E-04 | -9.46E+00 | 0.0002 | 160  | 6.10%  | 7872.6  | 4.0%   |
| PAX3[KRHR]Muscle/Paired.Homeobox/IR4-PAX3-KRHR-ChIP-Seq(GSE190190)Hom | ACCRGTGACTAATTNN   | 1.00E-04 | -9.36E+00 | 0.0002 | 361  | 13.64% | 6870.3  | 3.52%  |
| NFYA2[NFY]Pancreas-LRH1-ChIP-Seq(GSE34295)Hom                         | BTCAAGCTG          | 1.00E-04 | -9.30E+00 | 0.0002 | 123  | 4.7%   | 19687.5 | 10.03% |
| RUNX3[RUNX]HEK293-RUNX3-ChIP-Seq(GSE21713)Hom                         | SAAKACACAG         | 1.00E-04 | -9.28E+00 | 0.0002 | 241  | 9.0%   | 15911.1 | 8.16%  |
| Mez2a[MADS]HL1-Mez2a biotin-ChIP-Seq(GSE21529)Hom                     | CYAAATAAG          | 1.00E-04 | -9.27E+00 | 0.0002 | 180  | 6.86%  | 10121.3 | 5.16%  |
| brachyury1[box]Mesoderm-Brachyury-ChIP-Seq(GSE54963)Hom               | ANITMRCASBNNGTGY   | 1.00E-03 | -9.17E+00 | 0.0002 | 149  | 5.68%  | 8133.7  | 4.14%  |
| CAGX[MADS]Liver-Sir1-ChIP-Seq(GSE5909)Hom                             | CCATCATATG         | 1.00E-03 | -9.16E+00 | 0.0002 | 140  | 5.4%   | 7560.4  | 3.85%  |
| EBF2[EBF]BrownAdipose-EBF2-ChIP-Seq(GSE97114)Hom                      | NABTCCCVGCGGVAH    | 1.00E-03 | -9.02E+00 | 0.0003 | 387  | 14.75% | 24170.2 | 12.32% |
| Pt1x1[Homeobox]G/Crat-Pt1x1-ChIP-Seq(GSE58009)Hom                     | ATGCATATGA         | 1.00E-03 | -9.01E+00 | 0.0003 | 177  | 6.75%  | 9979.4  | 5.09%  |
| Rever1[NR]LDZ[RAW]Rever1 biotin-ChIP-Seq(GSE45914)Hom                 | GTRGCTGACGGTCA     | 1.00E-03 | -8.91E+00 | 0.0003 | 96   | 3.73%  | 4964    | 2.53%  |
| GATA2[Zf]IR31-Gata2-ChIP-Seq(GSE20886)Hom                             | NNWNNBAGATAYATCTC  | 1.00E-03 | -8.91E+00 | 0.0003 | 380  | 14.6%  | 4960    | 2.47%  |
| NAT1[Stat]HelaS3-STAT1-ChIP-Seq(GSE12782)Hom                          | NAT1TCCGGAAT       | 1.00E-03 | -8.78E+00 | 0.0003 | 156  | 5.96%  | 8662.1  | 4.41%  |
| HRE[HSP]Stratum-HSF1-ChIP-Seq(GSE3000)Hom                             | TTCTAGABNTICTA     | 1.00E-03 | -8.72E+00 | 0.0004 | 140  | 4.19%  | 5736.4  | 2.92%  |
| PRDM12[Zf]H1-PRDM12-ChIP-Seq(GSE42606)Hom                             | ROGTCCTCAADY       | 1.00E-03 | -8.72E+00 | 0.0004 | 142  | 5.43%  | 1768.3  | 0.9%   |
| HLF[Zf]HSC-HLF-Flag-ChIP-Seq(GSE69817)Hom                             | RTATGAYAB          | 1.00E-03 | -8.61E+00 | 0.0003 | 399  | 15.21% | 52131.5 | 27.18% |
| ZNF652[Zf]C2-ZNF652-Flag-ChIP-Seq(Encode)Hom                          | TTAACCCTT1YNNKN    | 1.00E-03 | -8.57E+00 | 0.0004 | 120  | 4.87%  | 6390.6  | 3.26%  |
| NFSA2[NFY]M5-Nf5a-ChIP-Seq(GSE1919)Hom                                | BTCAAGCTG          | 1.00E-03 | -8.37E+00 | 0.0004 | 91   | 3.41%  | 14440.2 | 7.38%  |
| NUT1[NFY]K562-NK4A1-ChIP-Seq(GSE11963)Hom                             | GCATCTTNNCT        | 1.00E-03 | -8.30E+00 | 0.0005 | 200  | 3.81%  | 4178.7  | 2.64%  |
| FOXK2[Forebrain]UZOS-FOXK2-ChIP-Seq(EMTAB-2204)Hom                    | SCHTTGTTACAT       | 1.00E-03 | -8.26E+00 | 0.0004 | 332  | 12.65% | 20608.2 | 10.50% |
| ETS1[TS]Promoter/Target                                               | KAGCCGGAGT         | 1.00E-03 | -8.18E+00 | 0.0006 | 195  | 7.43%  | 11345.2 | 5.78%  |
| HIF-1a[HLH]K562-HIF1a-ChIP-Seq(GSE28352)Hom                           | TAZCTCTCY          | 1.00E-03 | -8.11E+00 | 0.0007 | 98   | 3.8%   | 24857.8 | 12.5%  |
| NPAS1[HLH]Liver-NPAS-ChIP-Seq(GSE39850)Hom                            | NVACCGTG           | 1.00E-03 | -7.91E+00 | 0.0007 | 678  | 25.84% | 45154.8 | 23.01% |
| FoxM1[Forebrain]HES3-FOXH1-ChIP-Seq(GSE29422)Hom                      | NNITGGTATSS        | 1.00E-03 | -7.86E+00 | 0.0008 | 277  | 10.56% | 16957.3 | 8.64%  |
| HOXA2[Homeobox]Imes-Hoxa2-ChIP-Seq(GSE11431)Hom                       | CATCATMATCAT       | 1.00E-03 | -7.78E+00 | 0.0009 | 62   | 2.36%  | 2300    | 1.2%   |
| Pt1[Homeobox]G/Crat-Pt1-ChIP-Seq(GSE58009)Hom                         | ATGMATDC           | 1.00E-03 | -7.72E+00 | 0.0009 | 449  | 17.11% | 29942.2 | 14.75% |
| RUNX2[RUNX]Pca-RUNX2-ChIP-Seq(GSE33889)Hom                            | NUNAACACANN        | 1.00E-03 | -7.67E+00 | 0.0009 | 541  | 20.62% | 35466.3 | 18.07% |
| ZNF180[Zf]HEK293-ZNF180-GFP-ChIP-Seq(GSE38341)Hom                     | TGACACAGCA         | 1.00E-03 | -7.67E+00 | 0.0009 | 359  | 13.88% | 22698.8 | 11.55% |
| Am1[Homeobox]HMG17-Am1-ChIP-Seq(GSE45914)Hom                          | NKACACACCA         | 1.00E-03 | -7.64E+00 | 0.0009 | 241  | 9.18%  | 14658.1 | 7.42%  |
| ZfBP1[IRF]IRF1-Th17-Baif-ChIP-Seq(GSE39758)Hom                        | NAGT1TCABTHGACTNW  | 1.00E-03 | -7.45E+00 | 0.0011 | 258  | 10.52% | 19357.2 | 9.8%   |
| Mez2c[MADS]GM12878-Mez2c-ChIP-Seq(GSE32465)Hom                        | DCYAAATAAG         | 1.00E-03 | -7.41E+00 | 0.0012 | 181  | 6.90%  | 10595.8 | 5.40%  |
| Tcp21[Cf]Zf]ES-Tcp21-ChIP-Seq(GSE11431)Hom                            | NRAAKGCTT1YAAACCRG | 1.00E-03 | -7.40E+00 | 0.0012 | 138  | 5.18%  | 2268.1  | 1.17%  |
| p73[pe3]Tadpole-p73-ChIP-Seq(PR.JNA310161)Hom                         | NRRRCAGVCCDGRCACT  | 1.00E-03 | -7.36E+00 | 0.0012 | 33   | 1.26%  | 3116.8  | 0.67%  |
| ROrta[RUNX]Liver-Rorc-ChIP-Seq(GSE10115)Hom                           | NBTAATAGTGT        | 1.00E-03 | -7.33E+00 | 0.0012 | 53   | 2.02%  | 2452.9  | 1.25%  |
| TNFRNF[NFY]K562-TNFRNF-ChIP-Seq(GSE18256)Hom                          | CTTCCGCTGCCA       | 1.00E-03 | -7.25E+00 | 0.0013 | 248  | 11.53% | 15133.3 | 7.71%  |
| Bar1[Homeobox]Stomach-Bar1-Sar-Seq-ChIP-Seq(GSE69483)Hom              | AAACMATAN          | 1.00E-03 | -7.25E+00 | 0.0013 | 214  | 8.12%  | 13848.3 | 6.55%  |
| ZNF264[Zf]HEK293-ZNF264-GFP-ChIP-Seq(GSE58341)Hom                     | RGGGACCTAACY       | 1.00E-03 | -7.18E+00 | 0.0014 | 280  | 10.67% | 17363.2 | 8.85%  |
| Srsf2[TS]M5-Srsf2-Flag-ChIP-Seq(GSE2999)Hom                           | RKGGCCGGGAGC       | 1.00E-03 | -7.15E+00 | 0.0015 | 459  | 17.49% | 29892.7 | 15.22% |
| FoxL1[Forebrain]Lung-FoxL1-ChIP-Seq(GSE71951)Hom                      | WVATYTAACAACAN     | 1.00E-03 | -7.13E+00 | 0.0015 | 251  | 9.5%   | 30721.2 | 15.4%  |
| Stat3[Stat]M5-Stat3-ChIP-Seq(GSE11431)Hom                             | CTTCCGGGAA         | 1.00E-03 | -7.12E+00 | 0.0015 | 436  | 9.38%  | 15055.5 | 7.87%  |
| Lhx1[Homeobox]Embryo-Caricoma-Lhx1-ChIP-Seq(GSE70957)Hom              | NNYTAATAR          | 1.00E-03 | -7.07E+00 | 0.0016 | 246  | 9.62%  | 28270.8 | 14.11% |
| Frab2[BP]Stratum-Fr2-ChIP-Seq(GSE34871)Hom                            | CATGATGATCAT       | 1.00E-03 | -7.07E+00 | 0.0016 | 1032 | 38.92% | 37893.2 | 19.7%  |
| MafB[Zf]BMM-MafB-ChIP-Seq(GSE15722)Hom                                | WNTGCTGASTCAGCANNV | 1.00E-03 | -7.05E+00 | 0.0016 | 338  | 12.88% | 21416.2 | 10.91% |
| CEBPb[Zf]ThioMac-CEBPb-ChIP-Seq(GSE21512)Hom                          | ATTGCGGAC          | 1.00E-03 | -7.03E+00 | 0.0016 | 289  | 10.82% | 18029.6 | 9.19%  |
| ZFX[Zf]M5-Zfx-ChIP-Seq(GSE11431)Hom                                   | AGGCTG             | 1.00E-03 | -7.00E+00 | 0.0016 | 470  | 17.91% | 30702.7 | 15.65% |
| PSE1[RNA]K562-PSE1-Seq                                                | WVATYTAACAACAN     | 1.00E-03 | -7.00E+00 | 0.0016 | 255  | 9.72%  | 19753.2 | 10.14% |
| RUNX-AML[RUNX]CD4+Pol1-ChIP-Seq(Barski.et.al)Hom                      | GCTGTGGTWW         | 1.00E-02 | -6.88E+00 | 0.0018 | 454  | 17.30% | 29619.1 | 15.09% |
| DMRT1[DM]Testis-DMRT1-ChIP-Seq(GSE6040)Hom                            | YDGHCAWGTATDC      | 1.00E-02 | -6.79E+00 | 0.0021 | 114  | 4.23%  | 6141.2  | 3.13%  |
| NFkB[pe3]H2b[Homeobox]pe3-ChIP-Seq(GSE104319)Hom                      | GGGGGAGCTG         | 1.00E-02 | -6.65E+00 | 0.0021 | 61   | 2.34%  | 3194.3  | 1.62%  |
| MafA[Zf]Hela-MafA-ChIP-Seq(GSE30296)Hom                               | TGCTGACTCA         | 1.00E-02 | -6.65E+00 | 0.0021 | 511  | 19.59% | 33972.4 | 17.31% |
| GRE[NR]IR3A54-GR-ChIP-Seq(GSE32465)Hom                                | NRFGACBNYTGICY     | 1.00E-02 | -6.60E+00 | 0.0024 | 70   | 2.67%  | 3572.1  | 1.82%  |
| c-Jun[CRE]Zf]IR3562-cJun-ChIP-Seq(GSE31477)Hom                        | ATGAGCTCACCT       | 1.00E-02 | -6.59E+00 | 0.0024 | 108  | 4.0%   | 16588.2 | 8.45%  |
| PNR3[RY]endobronch-PKR-ChIP-Seq(GSE38341)Hom                          | AAGACAAWHGTGTC     | 1.00E-02 | -6.58E+00 | 0.0024 | 114  | 4.24%  | 6387.8  | 3.24%  |
| Klf4[Zf]M5-Klf4-ChIP-Seq(GSE11431)Hom                                 | GCCACACCCCA        | 1.00E-02 | -6.58E+00 | 0.0024 | 252  | 9.60%  | 17662.5 | 9.28%  |
| ROrta[RUNX]EL4-ROrta-Flag-ChIP-Seq(GSE5909)Hom                        | AAVYAGTCA          | 1.00E-02 | -6.55E+00 | 0.0025 | 78   | 2.97%  | 4076.8  | 2.08%  |
| ROrta[RUNX]EL4-ROrta-Flag-ChIP-Seq(GSE5909)Hom                        | AAVYAGTCA          | 1.00E-02 | -6.55E+00 | 0.0025 | 78   | 2.97%  | 4076.8  | 2.08%  |
| SF1[NFY]H2SR-Nfs1-ChIP-Seq(GSE44220)Hom                               | CAAGGHCANV         | 1.00E-02 | -6.55E+00 | 0.0026 | 226  | 8.81%  | 13856.6 | 7.06%  |
| PBX1[Homeobox]MCF7-PBX1-ChIP-Seq(GSE28007)Hom                         | GSGCTGTCACTCA      | 1.00E-02 | -6.49E+00 | 0.0026 | 59   | 2.25%  | 2913.3  | 1.48%  |
| pe3[pe3]Sas3-pe3-ChIP-Seq(GSE15722)Hom                                | NRRATGYVRCRATGY    | 1.00E-02 | -6.48E+00 | 0.0026 | 55   | 2.0%   |         |        |

**Supplementary Figure 4. ATAC-seq peaks and Motif analysis.** Motif analysis *Top* regions: List of known motifs from Homer (P-value < 0.05) using peaks upregulated in KP6 compared to KP.

| Motif Name | Motif Name      | Consensus          | P-value  | Log P-value | q-value (Benjamini) | # of Target Sequences with Motif (of 2521) | % of Target Sequences with Motif | # of Background Sequences with Motif (of 206156) | % of Background Sequences with Motif |
|------------|-----------------|--------------------|----------|-------------|---------------------|--------------------------------------------|----------------------------------|--------------------------------------------------|--------------------------------------|
| Nkx2-1     | Homeobox/Nkx2-1 | TTRAGTCATCA        | 1.00E-06 | -8.707E+01  | 0                   | 116                                        | 4.582%                           | 66023                                            | 3.19%                                |
| Nkx2-1     | Homeobox/Nkx2-1 | RSCACCTYRAG        | 1.00E-04 | -6.933E+01  | 0                   | 116                                        | 4.582%                           | 65531                                            | 3.14%                                |
| Nkx2-1     | Homeobox/Nkx2-1 | BTRRAGTGSN         | 1.00E-38 | -8.311E+01  | 0                   | 1021                                       | 40.50%                           | 592104                                           | 28.72%                               |
| Nkx2-1     | Homeobox/Nkx2-1 | BRRSCACTTAA        | 1.00E-40 | -8.422E+01  | 0                   | 1138                                       | 44.82%                           | 61761                                            | 32.80%                               |
| Nkx2-1     | Homeobox/Nkx2-1 | VTGCATCATC         | 1.00E-38 | -8.19E+01   | 0                   | 1138                                       | 44.82%                           | 604037                                           | 41.74%                               |
| Nkx2-1     | Homeobox/Nkx2-1 | YTGCCAGG           | 1.00E-28 | -6.668E+01  | 0                   | 1345                                       | 52.90%                           | 580669                                           | 28.17%                               |
| Nkx2-1     | Homeobox/Nkx2-1 | DAGTASGTCATH       | 1.00E-28 | -6.15E+01   | 0                   | 1194                                       | 47.33%                           | 637967                                           | 40.65%                               |
| Nkx2-1     | Homeobox/Nkx2-1 | DAGTASGTCATC       | 1.00E-26 | -5.95E+01   | 0                   | 1276                                       | 50.2%                            | 629643                                           | 40.21%                               |
| Nkx2-1     | Homeobox/Nkx2-1 | RTAGTGATCAT        | 1.00E-25 | -5.95E+01   | 0                   | 1294                                       | 51.33%                           | 763319                                           | 40.65%                               |
| Nkx2-1     | Homeobox/Nkx2-1 | NNATGASTCATH       | 1.00E-25 | -5.87E+01   | 0                   | 1107                                       | 42.92%                           | 774965                                           | 37.60%                               |
| Nkx2-1     | Homeobox/Nkx2-1 | YTGTCATCA          | 1.00E-25 | -5.86E+01   | 0                   | 1561                                       | 61.52%                           | 120583                                           | 57.49%                               |
| Nkx2-1     | Homeobox/Nkx2-1 | AAGCAGCTAA         | 1.00E-25 | -5.76E+01   | 0                   | 1218                                       | 47.31%                           | 705911                                           | 34.25%                               |
| Nkx2-1     | Homeobox/Nkx2-1 | TRCATTCGAG         | 1.00E-24 | -5.54E+01   | 0                   | 769                                        | 30.50%                           | 448288                                           | 21.75%                               |
| Nkx2-1     | Homeobox/Nkx2-1 | CGCATCATCATC       | 1.00E-23 | -5.34E+01   | 0                   | 1116                                       | 43.27%                           | 71268                                            | 34.95%                               |
| Nkx2-1     | Homeobox/Nkx2-1 | ACAGGAAGTG         | 1.00E-23 | -5.31E+01   | 0                   | 948                                        | 37.60%                           | 584771                                           | 28.57%                               |
| Nkx2-1     | Homeobox/Nkx2-1 | WAAGTAACAA         | 1.00E-22 | -5.24E+01   | 0                   | 661                                        | 26.22%                           | 375248                                           | 18.20%                               |
| Nkx2-1     | Homeobox/Nkx2-1 | SAAKCAACAG         | 1.00E-21 | -4.95E+01   | 0                   | 582                                        | 23.09%                           | 323772                                           | 15.77%                               |
| Nkx2-1     | Homeobox/Nkx2-1 | CYTRCATTCA         | 1.00E-21 | -4.90E+01   | 0                   | 674                                        | 26.74%                           | 389799                                           | 19.51%                               |
| Nkx2-1     | Homeobox/Nkx2-1 | AAACCCAGRM         | 1.00E-21 | -4.88E+01   | 0                   | 712                                        | 28.24%                           | 417473                                           | 20.25%                               |
| Nkx2-1     | Homeobox/Nkx2-1 | CGTGTGGTTW         | 1.00E-20 | -4.78E+01   | 0                   | 564                                        | 22.37%                           | 313685                                           | 15.25%                               |
| Nkx2-1     | Homeobox/Nkx2-1 | AACCGGAGT          | 1.00E-20 | -4.72E+01   | 0                   | 624                                        | 32.69%                           | 502483                                           | 24.58%                               |
| Nkx2-1     | Homeobox/Nkx2-1 | YTGWCADY           | 1.00E-20 | -4.71E+01   | 0                   | 443                                        | 57.24%                           | 967235                                           | 47.89%                               |
| Nkx2-1     | Homeobox/Nkx2-1 | CTGTGTAATWY        | 1.00E-20 | -4.67E+01   | 0                   | 511                                        | 20.27%                           | 270561                                           | 13.51%                               |
| Nkx2-1     | Homeobox/Nkx2-1 | WAAGTAACAA         | 1.00E-20 | -4.62E+01   | 0                   | 1551                                       | 21.86%                           | 309922                                           | 14.89%                               |
| Nkx2-1     | Homeobox/Nkx2-1 | ACCGGAAGTG         | 1.00E-19 | -4.60E+01   | 0                   | 727                                        | 28.75%                           | 41486                                            | 20.13%                               |
| Nkx2-1     | Homeobox/Nkx2-1 | TRTTCATTCA         | 1.00E-19 | -4.47E+01   | 0                   | 579                                        | 22.97%                           | 326931                                           | 15.89%                               |
| Nkx2-1     | Homeobox/Nkx2-1 | NNATGASTCATH       | 1.00E-19 | -4.43E+01   | 0                   | 1091                                       | 42.8%                            | 628374                                           | 18.92%                               |
| Nkx2-1     | Homeobox/Nkx2-1 | NNATGASTCATH       | 1.00E-18 | -4.36E+01   | 0                   | 617                                        | 24.33%                           | 37492                                            | 18.19%                               |
| Nkx2-1     | Homeobox/Nkx2-1 | TCGTCGATCAT        | 1.00E-18 | -4.29E+01   | 0                   | 541                                        | 20.51%                           | 28726                                            | 13.84%                               |
| Nkx2-1     | Homeobox/Nkx2-1 | ACAGGAAGTG         | 1.00E-18 | -4.17E+01   | 0                   | 687                                        | 27.25%                           | 411557                                           | 19.89%                               |
| Nkx2-1     | Homeobox/Nkx2-1 | CGCGGAAGTG         | 1.00E-17 | -4.02E+01   | 0                   | 609                                        | 24.16%                           | 357581                                           | 17.35%                               |
| Nkx2-1     | Homeobox/Nkx2-1 | NYTYTCGGH          | 1.00E-17 | -4.00E+01   | 0                   | 881                                        | 34.51%                           | 41004                                            | 19.89%                               |
| Nkx2-1     | Homeobox/Nkx2-1 | WYTGTCATCA         | 1.00E-17 | -3.99E+01   | 0                   | 1241                                       | 49.19%                           | 629253                                           | 31.4%                                |
| Nkx2-1     | Homeobox/Nkx2-1 | NATGASTCABNN       | 1.00E-16 | -3.90E+01   | 0                   | 911                                        | 36.14%                           | 583926                                           | 28.36%                               |
| Nkx2-1     | Homeobox/Nkx2-1 | CGAGGAAGTG         | 1.00E-16 | -3.81E+01   | 0                   | 1591                                       | 63.11%                           | 1130787                                          | 54.86%                               |
| Nkx2-1     | Homeobox/Nkx2-1 | WYTGTCATCA         | 1.00E-16 | -3.74E+01   | 0                   | 925                                        | 37.04%                           | 529422                                           | 26.2%                                |
| Nkx2-1     | Homeobox/Nkx2-1 | NRGCATTAAC         | 1.00E-15 | -3.62E+01   | 0                   | 1499                                       | 63.07%                           | 1154502                                          | 55.04%                               |
| Nkx2-1     | Homeobox/Nkx2-1 | AGGTGTCA           | 1.00E-15 | -3.54E+01   | 0                   | 1590                                       | 64.07%                           | 1060723                                          | 51.46%                               |
| Nkx2-1     | Homeobox/Nkx2-1 | NNATGASTCATH       | 1.00E-15 | -3.48E+01   | 0                   | 987                                        | 40.43%                           | 37269                                            | 18.0%                                |
| Nkx2-1     | Homeobox/Nkx2-1 | CTGTGTTAC          | 1.00E-13 | -3.19E+01   | 0                   | 741                                        | 34.95%                           | 576642                                           | 27.97%                               |
| Nkx2-1     | Homeobox/Nkx2-1 | GAGTASTCATCN       | 1.00E-13 | -3.14E+01   | 0                   | 885                                        | 34.95%                           | 474666                                           | 23.03%                               |
| Nkx2-1     | Homeobox/Nkx2-1 | CGTGTGGAGT         | 1.00E-13 | -3.09E+01   | 0                   | 851                                        | 33.29%                           | 427667                                           | 20.59%                               |
| Nkx2-1     | Homeobox/Nkx2-1 | CTGTGTGG           | 1.00E-13 | -3.05E+01   | 0                   | 757                                        | 31.22%                           | 350817                                           | 24.65%                               |
| Nkx2-1     | Homeobox/Nkx2-1 | AVCAGCTGT          | 1.00E-12 | -2.87E+01   | 0                   | 1780                                       | 69.42%                           | 129888                                           | 62.57%                               |
| Nkx2-1     | Homeobox/Nkx2-1 | DGTAACAA           | 1.00E-12 | -2.84E+01   | 0                   | 389                                        | 15.07%                           | 215084                                           | 10.32%                               |
| Nkx2-1     | Homeobox/Nkx2-1 | AVCAGGAAGTG        | 1.00E-12 | -2.84E+01   | 0                   | 703                                        | 27.89%                           | 449433                                           | 21.80%                               |
| Nkx2-1     | Homeobox/Nkx2-1 | WWRTTAAACAG        | 1.00E-12 | -2.84E+01   | 0                   | 406                                        | 16.0%                            | 238362                                           | 11.33%                               |
| Nkx2-1     | Homeobox/Nkx2-1 | AGGTGTGGAGT        | 1.00E-12 | -2.84E+01   | 0                   | 620                                        | 24.59%                           | 383799                                           | 18.92%                               |
| Nkx2-1     | Homeobox/Nkx2-1 | BSNTGTTCATWYGN     | 1.00E-12 | -2.81E+01   | 0                   | 242                                        | 9.60%                            | 128229                                           | 5.9%                                 |
| Nkx2-1     | Homeobox/Nkx2-1 | TRHRTNR            | 1.00E-12 | -2.81E+01   | 0                   | 1621                                       | 64.30%                           | 1182133                                          | 57.35%                               |
| Nkx2-1     | Homeobox/Nkx2-1 | MACAGGAAGT         | 1.00E-12 | -2.79E+01   | 0                   | 275                                        | 10.91%                           | 144782                                           | 7.02%                                |
| Nkx2-1     | Homeobox/Nkx2-1 | NRWTGTTTAC         | 1.00E-11 | -2.74E+01   | 0                   | 620                                        | 24.59%                           | 290732                                           | 14.11%                               |
| Nkx2-1     | Homeobox/Nkx2-1 | NNBARRGGTCA        | 1.00E-11 | -2.72E+01   | 0                   | 687                                        | 27.25%                           | 440552                                           | 21.37%                               |
| Nkx2-1     | Homeobox/Nkx2-1 | TGTTCATCAACAC      | 1.00E-11 | -2.62E+01   | 0                   | 573                                        | 22.73%                           | 358086                                           | 17.37%                               |
| Nkx2-1     | Homeobox/Nkx2-1 | YBSYGTCTG          | 1.00E-11 | -2.59E+01   | 0                   | 761                                        | 30.1%                            | 424933                                           | 24.23%                               |
| Nkx2-1     | Homeobox/Nkx2-1 | CGCGGAAGTG         | 1.00E-11 | -2.59E+01   | 0                   | 504                                        | 19.91%                           | 234465                                           | 11.38%                               |
| Nkx2-1     | Homeobox/Nkx2-1 | WAGRCANCTGTGC      | 1.00E-10 | -2.52E+01   | 0                   | 987                                        | 39.35%                           | 683734                                           | 33.17%                               |
| Nkx2-1     | Homeobox/Nkx2-1 | NTCTGTCGNH         | 1.00E-10 | -2.49E+01   | 0                   | 495                                        | 19.7%                            | 320289                                           | 15.89%                               |
| Nkx2-1     | Homeobox/Nkx2-1 | CKCAGCTAC          | 1.00E-10 | -2.45E+01   | 0                   | 875                                        | 34.1%                            | 363308                                           | 17.63%                               |
| Nkx2-1     | Homeobox/Nkx2-1 | TCGTGAGB           | 1.00E-10 | -2.44E+01   | 0                   | 975                                        | 38.69%                           | 668785                                           | 32.44%                               |
| Nkx2-1     | Homeobox/Nkx2-1 | CGTGTGGAGT         | 1.00E-10 | -2.44E+01   | 0                   | 925                                        | 37.04%                           | 628868                                           | 30.75%                               |
| Nkx2-1     | Homeobox/Nkx2-1 | CVTRGCTCCC         | 1.00E-10 | -2.39E+01   | 0                   | 812                                        | 32.21%                           | 543808                                           | 26.37%                               |
| Nkx2-1     | Homeobox/Nkx2-1 | ARGGTGTCA          | 1.00E-10 | -2.39E+01   | 0                   | 860                                        | 34.11%                           | 580686                                           | 28.17%                               |
| Nkx2-1     | Homeobox/Nkx2-1 | TTCAAGCTTG         | 1.00E-10 | -2.31E+01   | 0                   | 851                                        | 33.29%                           | 404484                                           | 20.59%                               |
| Nkx2-1     | Homeobox/Nkx2-1 | GKBCARAGTCA        | 1.00E-10 | -2.31E+01   | 0                   | 726                                        | 28.7%                            | 479177                                           | 23.25%                               |
| Nkx2-1     | Homeobox/Nkx2-1 | AAACYKGTWDMACGRTTB | 1.00E-09 | -2.24E+01   | 0                   | 282                                        | 10.90%                           | 13729                                            | 6.68%                                |
| Nkx2-1     | Homeobox/Nkx2-1 | NTCTGTCGNH         | 1.00E-09 | -2.21E+01   | 0                   | 617                                        | 24.34%                           | 388604                                           | 18.92%                               |
| Nkx2-1     | Homeobox/Nkx2-1 | VCAGTGBNN          | 1.00E-09 | -2.22E+01   | 0                   | 557                                        | 21.8%                            | 609433                                           | 29.42%                               |
| Nkx2-1     | Homeobox/Nkx2-1 | ACCATCTGTT         | 1.00E-09 | -2.21E+01   | 0                   | 727                                        | 28.84%                           | 484403                                           | 23.45%                               |
| Nkx2-1     | Homeobox/Nkx2-1 | CAMPNTE            | 1.00E-09 | -2.21E+01   | 0                   | 525                                        | 21.46%                           | 163953                                           | 8.12%                                |
| Nkx2-1     | Homeobox/Nkx2-1 | ASWTCTGBT          | 1.00E-09 | -2.20E+01   | 0                   | 575                                        | 22.81%                           | 369877                                           | 17.90%                               |
| Nkx2-1     | Homeobox/Nkx2-1 | HAWRGGGCGM         | 1.00E-09 | -2.20E+01   | 0                   | 1047                                       | 41.53%                           | 732539                                           | 35.54%                               |
| Nkx2-1     | Homeobox/Nkx2-1 | NNATGASTCATH       | 1.00E-09 | -2.19E+01   | 0                   | 617                                        | 24.34%                           | 388604                                           | 18.92%                               |
| Nkx2-1     | Homeobox/Nkx2-1 | NYTYTTCATCN        | 1.00E-09 | -2.17E+01   | 0                   | 238                                        | 9.44%                            | 128901                                           | 6.25%                                |
| Nkx2-1     | Homeobox/Nkx2-1 | VACAGGAAGT         | 1.00E-09 | -2.13E+01   | 0                   | 719                                        | 14.99%                           | 228764                                           | 11.00%                               |
| Nkx2-1     | Homeobox/Nkx2-1 | CGTGTGGAGT         | 1.00E-09 | -2.12E+01   | 0                   | 618                                        | 24.40%                           | 401013                                           | 19.45%                               |
| Nkx2-1     | Homeobox/Nkx2-1 | WWRTTAAACAG        | 1.00E-09 | -2.08E+01   | 0                   | 405                                        | 15.89%                           | 194889                                           | 9.9%                                 |
| Nkx2-1     | Homeobox/Nkx2-1 | RGCATATNAA         | 1.00E-09 | -2.08E+01   | 0                   | 200                                        | 39.67%                           | 698843                                           | 33.91%                               |
| Nkx2-1     | Homeobox/Nkx2-1 | NNVCCAGTCBN        | 1.00E-09 | -2.06E+01   | 0                   | 136                                        | 29.19%                           | 494337                                           | 23.89%                               |
| Nkx2-1     | Homeobox/Nkx2-1 | TTTTTTCAT          | 1.00E-09 | -2.03E+01   | 0                   | 101                                        | 4.04%                            | 116114                                           | 5.9%                                 |
| Nkx2-1     | Homeobox/Nkx2-1 | NVCCAGTG           | 1.00E-08 | -2.02E+01   | 0                   | 760                                        | 30.15%                           | 118823                                           | 9.23%                                |
| Nkx2-1     | Homeobox/Nkx2-1 | SCHTGTTTACAT       | 1.00E-08 | -1.99E+01   | 0                   | 322                                        | 12.77%                           | 59323                                            | 2.92%                                |
| Nkx2-1     | Homeobox/Nkx2-1 | TTCAAGCTTG         | 1.00E-08 | -1.98E+01   | 0                   | 620                                        | 24.59%                           | 246353                                           | 12.4%                                |
| Nkx2-1     | Homeobox/Nkx2-1 | TCGTGTGGY          | 1.00E-08 | -1.96E+01   | 0                   | 332                                        | 13.12%                           | 19733                                            | 9.67%                                |
| Nkx2-1     | Homeobox/Nkx2-1 | GNCCAGTG           | 1.00E-08 | -1.93E+01   | 0                   | 881                                        | 34.35%                           | 610225                                           | 29.80%                               |
| Nkx2-1     | Homeobox/Nkx2-1 | NTCTGTCGNH         | 1.00E-08 | -1.92E+01   | 0                   | 495                                        | 19.7%                            | 320289                                           | 15.89%                               |
| Nkx2-1     | Homeobox/Nkx2-1 | ACAGCTGTGC         | 1.00E-08 | -1.90E+01   | 0                   | 1166                                       | 46.2%                            | 83709                                            | 40.61%                               |
| Nkx2-1     | Homeobox/Nkx2-1 | CGTGTGGTR          | 1.00E-08 | -1.87E+01   | 0                   | 828                                        | 32.84%                           | 570995                                           | 27.70%                               |
| Nkx2-1     | Homeobox/Nkx2-1 | RGCGGCGGCGCC       | 1.00E-08 | -1.82E+01   | 0                   | 745                                        | 30.52%                           | 428398                                           | 20.9%                                |
| Nkx2-1     | Homeobox/Nkx2-1 | YBGCAGGCGCC        | 1.00E-07 | -1.81E+01   | 0                   | 769                                        | 30.50%                           | 527117                                           | 25.57%                               |
| Nkx2-1     | Homeobox/Nkx2-1 | TCGTGATCAT         | 1.00E-07 | -1.79E+01   | 0                   | 688                                        | 27.3%                            | 381721                                           | 18.52%                               |
| Nkx2-1     | Homeobox/Nkx2-1 | ACATGTTG           | 1.00E-07 | -1.79E+01   | 0                   | 618                                        | 24.33%                           | 37442                                            | 18.2%                                |
| Nkx2-1     | Homeobox/Nkx2-1 | VNVRGCGTGGY        | 1.00E-07 | -1.77E+01   | 0                   | 517                                        | 20.55%                           | 134659                                           | 16.42%                               |
| Nkx2-1     | Homeobox/Nkx2-1 | CGTGTGGAGT         | 1.00E-07 | -1.72E+01   | 0                   | 318                                        | 12.57%                           | 318577                                           | 9.29%                                |
| Nkx2-1     | Homeobox/Nkx2-1 | RGCGGCGGCGCC       | 1.00E-07 | -1.69E+01   | 0                   | 620                                        | 24.59%                           | 288815                                           | 14.25%                               |
| Nkx2-1     | Homeobox/Nkx2-1 | CAAAGTGCAT         | 1.00E-07 | -1.64E+01   | 0                   | 387                                        | 38.3%                            | 667631                                           | 33.36%                               |
| Nkx2-1     | Homeobox/Nkx2-1 | SVTTCGGAARB        | 1.00E-07 | -1.63E+01   | 0                   | 357                                        | 14.16%                           | 222124                                           | 10.78%                               |
| Nkx2-1     | Homeobox/Nkx2-1 | TRTTCATTCA         | 1.00E-07 | -1.62E+01   | 0                   | 424                                        | 17.18%                           | 217924                                           | 13.2%                                |
| Nkx2-1     | Homeobox/Nkx2-1 | GATGAGCTCA         | 1.00E-06 | -1.58E+01   | 0                   | 411                                        | 15.68%                           | 154852                                           | 7.62%                                |
| Nkx2-1     | Homeobox/Nkx2-1 | NTTTCGGAAR         | 1.00E-06 | -1.58E+01   | 0                   | 449                                        | 18.62%                           | 268709                                           | 13.04%                               |
