# Supplementary material
Source: PubMed Central journal article supplement (PMC7195258)
Supplement: NIHMS1566883-supplement-6.pdf [file NIHMS1566883-supplement-6.pdf]

**Supplementary Table 5.** Summary of GEMM experiments. Summary of mouse experiments including strain, background, age at infection, type of viral delivery and titer, sex of the mice, and end time point for each experiment.

| Mouse strain   | Genotypes                                                  | Source                 | Stock | Reference                          |
|----------------|------------------------------------------------------------|------------------------|-------|------------------------------------|
| LSL K-Ras G12D | B6.129S4-Kras <sup>G12R/J</sup>                            | The Jackson laboratory | 8179  | Jackson et al, 2001. PMID 11751630 |
| p53 floxed     | B6.129P2-Trp53 <sup>tm1Bm/J</sup>                          | The Jackson laboratory | 8462  | Marion et al. PMID 10783170        |
| Gata6 floxed   | Gata6 <sup>tm1.2</sup> Sad/J                               | The Jackson laboratory | 8196  | Sodhi et al, 2006. PMID 16611361   |
| R26-LSL Tomato | B6.129-Gt(ROSA)26Sor <sup>tmob.11(CAG-tdTomato)Hze/J</sup> | Valentina Greco lab    |       |                                    |

| Background | Genotypes      | Viral delivery/injection<br>(Virus type / cells) | Age at inj  | Males/females                       | Titer (mouse)           | End timepoint            | Figures                                |
|------------|----------------|--------------------------------------------------|-------------|-------------------------------------|-------------------------|--------------------------|----------------------------------------|
| C57Bl/6    | K / KP         | AdCRE                                            | 20 weeks    | M / F                               | 2.5x10 <sup>7</sup> PFU | 60, 90, 111 days         | Fig. 1a                                |
| C57Bl/6    | K / KG         | AdCRE                                            | 10 weeks    | M & F                               | 5x10 <sup>8</sup> PFU   | 365 days                 | Fig. 1b                                |
| FVB        | KP / KPG       | AdCRE                                            | 12 weeks    | M & F                               | 2x10 <sup>7</sup> PFU   | 90 days                  | Fig. 1d                                |
| FVB        | K / KG         | Lenti-CRE-Luc                                    | 10 weeks    | M & F                               | 3x10 <sup>5</sup> VP    | 91 days                  | Fig. 1c, Supplementary Fig. 1c         |
| FVB        | KP / KPG       | Lenti-CRE-Luc                                    | 9-11 weeks  | M & F                               | 5x10 <sup>5</sup> VP    | 102 days                 | Fig. 1e, Fig. 2, Supplementary Fig. 1d |
| FVB        | K / KG         | AdCRE                                            | 11 weeks    | M & F                               | 5x10 <sup>8</sup> PFU   | 82 days                  | Supplementary Fig. 1b                  |
| C57Bl/6    | K / KG         | AdSPC-CRE                                        | 12-15 weeks | M & F                               | 2.5x10 <sup>8</sup> PFU | 154 days                 | Fig. 3d, Supplementary Fig. 1a, 2e,f   |
| C57Bl/6    | KP / KPG       | AdSPC-CRE                                        | 14-16 weeks | M & F                               | 2x10 <sup>8</sup> PFU   | 90 days                  | Fig. 3e, Supplementary Fig. 2e, f      |
| C57Bl/6    | K / KG         | AdCC10-CRE                                       | 9-11 weeks  | M & F                               | 2.5x10 <sup>8</sup> PFU | 93 days                  | Fig. 3b                                |
| C57Bl/6    | KP / KPG       | AdCC10-CRE                                       | 20 weeks    | M & F                               | 2.5x10 <sup>8</sup> PFU | 90 days                  | Fig. 3c, Supplementary Fig. 2d         |
| B6/129S    | R26-LSL Tomato | AdSPC-CRE, AdCC10-CRE                            | 16 weeks    | F, M, M                             | 2.5x10 <sup>8</sup> PFU | 11 days                  | Supplementary Fig. 2b, c               |
| C57Bl/6    | WT             | SPC KP and KPG cells                             | 6 weeks     | Matched to sex origin of cell lines | -                       | 20 days                  | Fig. 3g                                |
| Athymic    | WT             | SPC KPG cells                                    | 7 weeks     | M                                   | -                       | 13 days post-doxycycline | Supplementary Fig. 2g                  |

| Abbreviation | Genotype                          |
|--------------|-----------------------------------|
| K            | KrasG12D                          |
| KG           | KrasG12D Gata6 floxed             |
| KP           | Kras G12D p53 floxed              |
| KPG          | Kras G12D p53 floxed Gata6 floxed |
